# Supplementary material for: Proteomic and phosphoproteomic profilings reveal distinct cellular responses during Tilapinevirus tilapiae entry and replication
Source: PeerJ. 2025 Feb 21;13:e18923. doi: 10.7717/peerj.18923 (PMC11849505; doi:10.7717/peerj.18923)
Supplement: Supplemental Information 1 [file peerj-13-18923-s001.xlsx]

## Sheet: Sheet 1
T: Majority protein IDs	Protein names	Gene Names	Organism	Gene Ontology (biological process)	Gene Ontology (cellular component)	Gene Ontology (molecular function)	T: Peptide sequences	N: Q-value	N: Score	E11_BL-1_1	E11_BL-1_2	E11_BL-1_3	E11_BL-2_1	E11_BL-2_2	E11_BL-2_3	E11_BL-3_1	E11_BL-3_2	E11_BL-3_3	E11_10min-1_1	E11_10min-1_2	E11_10min-1_3	E11_10min-2_1	E11_10min-2_2	E11_10min-2_3	E11_10min-3_1	E11_10min-3_2	E11_10min-3_3	E11_30min-1_1	E11_30min-1_2	E11_30min-1_3	E11_30min-2_1	E11_30min-2_2	E11_30min-2_3	E11_30min-3_1	E11_30min-3_2	E11_30min-3_3	E11_1hr-1_1	E11_1hr-1_2	E11_1hr-1_3	E11_1hr-2_1	E11_1hr-2_2	E11_1hr-2_3	E11_1hr-3_1	E11_1hr-3_2	E11_1hr-3_3	E11_3hr-1_1	E11_3hr-1_2	E11_3hr-1_3	E11_3hr-2_1
A0A060BLN4	Fibroblast growth factor receptor (EC 2.7.10.1)	FGFR-1	Oreochromis niloticus (Nile tilapia) (Tilapia nilotica)	positive regulation of cell population proliferation [GO:0008284]	cytoplasmic vesicle [GO:0031410]; cytosol [GO:0005829]; nucleus [GO:0005634]; plasma membrane [GO:0005886]	ATP binding [GO:0005524]; fibroblast growth factor receptor activity [GO:0005007]	KQHAVPASK	0.98723	-1.7249	0	0	0	0	0	0	0	0	0	0	0	0	0	0	0	0	0	0	0	0	0	0	0	0	0	0	0	0	0	0	0	0	0	0	0	0	0	0	0	0
A0A076JPK5	CD2 cytoplasmic tail-binding protein 2	CD2BP2	Oreochromis niloticus (Nile tilapia) (Tilapia nilotica)		U5 snRNP [GO:0005682]		SCEAVSGPGSRFK	0.98712	-1.7576	0	0	0	0	0	0	0	0	0	0	0	0	0	0	0	0	0	0	0	0	0	0	0	0	0	0	0	0	0	0	0	0	0	0	0	0	0	0	0	0
A0A173N0H9	C-type lysozyme		Oreochromis niloticus (Nile tilapia) (Tilapia nilotica)	cytolysis [GO:0019835]; defense response to bacterium [GO:0042742]; metabolic process [GO:0008152]		lysozyme activity [GO:0003796]	ENGMDGYR	0.95992	-1.4762	0	0	0	0	0	0	0	0	0	0	0	0	0	0	0	0	0	0	0	0	0	0	0	0	0	0	0	0	0	0	0	0	0	0	0	0	0	0	0	0
A0A190A823	Interleukin family protein	IL-10	Oreochromis niloticus (Nile tilapia) (Tilapia nilotica)	immune response [GO:0006955]; regulation of cytokine production [GO:0001817]	extracellular space [GO:0005615]	cytokine activity [GO:0005125]	KQFDINNLNSTYTQMESR	0.31522	-0.34052	0	0	0	0	0	0	0	0	0	0	0	0	0	0	0	0	0	0	0	0	0	0	0	0	0	0	0	0	0	0	0	0	0	0	0	0	0	0	0	0
A0A3S5GZH8	MHC class II antigen beta chain	Orni-DAB	Oreochromis niloticus (Nile tilapia) (Tilapia nilotica)	antigen processing and presentation [GO:0019882]; immune response [GO:0006955]	MHC class II protein complex [GO:0042613]		YVLSCYYNK	0.96131	-1.5056	0	0	0	0	0	0	10.056	0	0	0	0	0	0	0	0	0	0	0	0	0	0	0	0	0	0	0	0	0	0	0	0	0	0	0	0	0	0	0	0	0
A0A669AUV3	Pleckstrin homology-like domain, family B, member 1a		Oreochromis niloticus (Nile tilapia) (Tilapia nilotica)				GSTLQKR	0.98644	-1.767	0	0	0	0	0	0	0	0	0	0	0	0	0	0	0	0	0	12.0073	0	0	0	0	0	0	0	0	0	0	0	0	0	0	0	0	0	0	0	0	0	0
A0A669AUY5	Chondromodulin		Oreochromis niloticus (Nile tilapia) (Tilapia nilotica)		membrane [GO:0016020]		GYWPWPYNYR	0.95435	-1.3779	0	0	0	0	0	0	0	0	0	0	0	0	0	0	0	0	0	0	0	0	0	0	0	0	0	0	0	0	0	0	0	0	0	0	0	0	0	0	0	0
A0A669AV07	inositol-polyphosphate 5-phosphatase (EC 3.1.3.56)	LOC100702630	Oreochromis niloticus (Nile tilapia) (Tilapia nilotica)	inositol phosphate dephosphorylation [GO:0046855]; phosphatidylinositol dephosphorylation [GO:0046856]	cellular anatomical entity [GO:0110165]	inositol-1,3,4,5-tetrakisphosphate 5-phosphatase activity [GO:0052659]; inositol-1,4,5-trisphosphate 5-phosphatase activity [GO:0052658]; inositol-polyphosphate 5-phosphatase activity [GO:0004445]	SKTVLRQR	0.94083	-0.94673	0	0	0	0	0	0	0	0	11.0245	0	0	0	0	0	0	0	0	0	0	0	0	0	0	0	0	0	0	0	0	0	0	0	0	0	0	0	0	0	0	0
A0A669AV71	Galactosamine (N-acetyl)-6-sulfatase	galns	Oreochromis niloticus (Nile tilapia) (Tilapia nilotica)			sulfuric ester hydrolase activity [GO:0008484]	SIWCSIFSNIQKR	0.93243	-0.58771	0	0	0	0	0	0	0	0	9.82096	0	0	0	0	0	0	0	0	0	0	0	0	0	0	0	0	0	0	0	0	0	0	0	0	0	0	0	0	0	0	0
A0A669AV85	Aminomethyltransferase (EC 2.1.2.10) (Glycine cleavage system T protein)		Oreochromis niloticus (Nile tilapia) (Tilapia nilotica)	glycine catabolic process [GO:0006546]	mitochondrion [GO:0005739]	aminomethyltransferase activity [GO:0004047]; transaminase activity [GO:0008483]	RVGLVSTGPPVR	0.98557	-1.7399	0	0	0	0	0	0	0	9.39142	0	0	0	0	0	0	0	0	0	0	0	0	0	0	0	0	0	0	0	0	0	0	0	0	0	0	0	0	0	0	0	0
A0A669AVI3	Peroxisome proliferator-activated receptor gamma coactivator 1-alpha	ppargc1a	Oreochromis niloticus (Nile tilapia) (Tilapia nilotica)	rhythmic process [GO:0048511]	PML body [GO:0016605]	RNA binding [GO:0003723]; transcription coregulator activity [GO:0003712]	SRSRSQSGSR	0.9916	-2.1205	0	0	0	0	0	0	0	0	0	0	0	0	0	0	0	0	0	0	0	0	0	0	0	0	0	0	0	0	0	0	0	0	0	0	0	0	9.9901	0	0	0
A0A669AVP4	FIIND domain-containing protein		Oreochromis niloticus (Nile tilapia) (Tilapia nilotica)		cytoplasm [GO:0005737]		SVLSLFLIFK	0.99834	-2.3564	0	0	0	0	0	0	0	0	0	0	0	0	0	0	0	0	0	0	0	0	0	0	0	0	0	0	0	0	0	0	0	0	0	0	0	0	0	0	8.64378	0
A0A669AVQ2	HEAT repeat-containing protein 6	heatr6	Oreochromis niloticus (Nile tilapia) (Tilapia nilotica)				SLATALENSEDTNDFLEYR	0.92196	-0.65782	0	0	0	0	0	0	0	0	0	0	0	0	0	0	0	0	0	0	0	0	0	0	0	0	0	0	0	0	0	0	0	0	0	0	0	0	0	0	0	0
A0A669AVS4	ribonuclease H (EC 3.1.26.4)		Oreochromis niloticus (Nile tilapia) (Tilapia nilotica)				LNHYKSCCK	0.98159	-1.6512	0	0	0	0	0	0	0	0	0	0	0	0	0	0	0	0	0	0	0	0	0	0	0	0	0	0	0	0	0	0	0	0	0	0	0	0	0	0	0	0
A0A669AVT0	Echinoderm microtubule-associated protein-like 2	LOC100704294	Oreochromis niloticus (Nile tilapia) (Tilapia nilotica)				GTIKEGTK	0.99335	-3.7607	0	0	0	0	9.93909	0	0	0	0	0	0	0	0	0	0	0	0	0	0	0	0	0	0	0	0	0	0	0	0	0	0	0	0	0	0	0	0	0	0	0
A0A669AVU0	Leucine rich repeat and sterile alpha motif containing 1	lrsam1	Oreochromis niloticus (Nile tilapia) (Tilapia nilotica)				ILNVEKNHLK	0.9912	-2.0791	0	0	0	0	0	0	0	0	0	0	0	0	0	0	0	0	0	0	0	0	0	0	0	0	0	0	0	0	0	0	0	0	0	0	0	0	0	9.82749	0	0
A0A669AW31	Cysteine rich secretory protein LCCL domain containing 1	crispld1	Oreochromis niloticus (Nile tilapia) (Tilapia nilotica)		extracellular region [GO:0005576]		HFFIKSYK	0.98625	-1.5929	0	0	0	0	0	0	0	0	0	0	0	0	0	0	0	0	0	0	0	0	0	0	0	0	0	0	0	0	0	0	0	0	8.47671	0	0	0	0	0	0	0
A0A669AW64	Uncharacterized protein		Oreochromis niloticus (Nile tilapia) (Tilapia nilotica)				RPRRSSSR	0.9333	-0.94894	0	0	0	0	0	0	0	0	0	0	0	0	0	0	0	0	0	0	0	0	0	0	0	0	0	0	0	0	0	0	0	0	0	0	0	0	9.07178	0	0	0
A0A669AW88	Zinc finger protein 429	LOC100693811	Oreochromis niloticus (Nile tilapia) (Tilapia nilotica)				AKERHMK	0.98399	-1.6223	0	0	0	0	0	0	0	0	0	0	0	0	0	0	0	0	0	0	0	0	0	0	0	0	0	0	0	0	0	0	0	0	0	0	0	0	0	0	0	0
A0A669AWA2	2-oxoglutarate and iron-dependent oxygenase domain containing 1		Oreochromis niloticus (Nile tilapia) (Tilapia nilotica)	metabolic process [GO:0008152]		2-oxoglutarate-dependent dioxygenase activity [GO:0016706]; iron ion binding [GO:0005506]; L-ascorbic acid binding [GO:0031418]	KSDKESR	0.93138	-0.98403	0	0	0	0	0	0	11.0518	0	0	0	0	0	0	0	0	0	0	0	0	0	0	0	0	0	0	0	0	0	0	0	0	0	0	0	0	0	0	0	0	0
A0A669AWD7	Zinc finger FYVE domain-containing protein 1	LOC100694251	Oreochromis niloticus (Nile tilapia) (Tilapia nilotica)		intracellular membrane-bounded organelle [GO:0043231]	metal ion binding [GO:0046872]	HFTPELR	1.0023	-1.5073	0	0	0	0	0	0	0	0	0	0	0	0	0	0	0	0	0	0	0	0	0	0	0	0	0	0	0	0	0	0	0	11.1171	0	0	0	0	0	0	0	0
A0A669AWG2	Reticulon-4 receptor-like 1	LOC100703114	Oreochromis niloticus (Nile tilapia) (Tilapia nilotica)		membrane [GO:0016020]		ALSLWDWLR	0.98879	-1.9817	0	0	0	0	0	0	0	0	0	8.93452	0	0	0	0	0	0	0	0	0	0	0	0	0	0	0	0	0	0	0	0	0	0	0	0	0	0	0	0	0	0
A0A669AWR8	Stereocilin		Oreochromis niloticus (Nile tilapia) (Tilapia nilotica)		cellular anatomical entity [GO:0110165]		TLGLLPSR	0.95659	-1.3893	0	0	0	11.1383	0	0	0	0	0	0	9.75206	0	0	0	0	0	12.0285	0	0	0	0	0	0	0	0	0	0	0	0	9.3845	0	0	0	0	0	10.439	0	0	0	0
A0A669AWT7	Si:ch1073-224n8.1		Oreochromis niloticus (Nile tilapia) (Tilapia nilotica)				IESCYDR	0.98213	-1.5892	0	0	0	0	0	0	0	0	0	0	0	0	0	0	0	0	0	0	0	0	0	0	0	0	0	0	0	0	0	0	0	0	0	0	0	0	0	0	0	0
A0A669AWW4	non-specific serine/threonine protein kinase (EC 2.7.11.1)	atm	Oreochromis niloticus (Nile tilapia) (Tilapia nilotica)	DNA repair [GO:0006281]; phosphorylation [GO:0016310]	nucleus [GO:0005634]	ATP binding [GO:0005524]; protein serine/threonine kinase activity [GO:0004674]	GCSSEDR	0.99306	-3.2372	0	0	0	0	0	0	0	0	0	0	0	0	0	0	0	0	0	0	0	0	0	9.87971	0	0	0	0	0	0	0	0	0	0	0	0	0	0	0	0	0	0
A0A669AX19	Discs, large homolog 5b (Drosophila), tandem duplicate 1		Oreochromis niloticus (Nile tilapia) (Tilapia nilotica)	regulation of apoptotic process [GO:0042981]	membrane [GO:0016020]		YELEKEAR	0.96538	-1.5077	0	0	0	0	0	0	0	0	0	0	0	0	0	0	0	0	0	0	0	0	0	0	0	0	0	0	0	0	0	0	0	0	0	0	0	0	0	0	0	0
A0A669AX26	ribonuclease H (EC 3.1.26.4)		Oreochromis niloticus (Nile tilapia) (Tilapia nilotica)	DNA integration [GO:0015074]		nucleic acid binding [GO:0003676]	EYVVWGK	0.9935	-3.7476	0	0	0	0	0	0	0	0	0	0	0	0	0	0	0	0	0	0	0	0	0	10.1744	0	0	0	0	0	0	0	0	9.54535	0	0	0	0	0	0	0	0	0
A0A669AX53	BRD4 interacting chromatin remodeling complex associated protein	bicra	Oreochromis niloticus (Nile tilapia) (Tilapia nilotica)				MDDEDGR	1.003	-1.5073	0	0	0	9.8282	0	0	0	0	0	0	0	0	0	0	0	0	0	0	0	0	0	0	0	0	0	0	0	0	0	0	0	0	0	0	0	0	0	0	0	0
A0A669AX96	protein disulfide-isomerase (EC 5.3.4.1)	p4hb	Oreochromis niloticus (Nile tilapia) (Tilapia nilotica)		endoplasmic reticulum lumen [GO:0005788]	protein disulfide isomerase activity [GO:0003756]	ALAPEYAK	0.99105	-2.0959	9.48876	0	9.07419	0	0	8.07393	10.337	10.3924	10.3851	0	0	0	0	0	0	0	0	0	0	0	0	0	0	0	9.65739	0	0	0	0	0	0	0	0	0	0	0	0	0	0	0
A0A669AXE3	Collagen alpha-1(XXI) chain	COL21A1	Oreochromis niloticus (Nile tilapia) (Tilapia nilotica)		cellular anatomical entity [GO:0110165]; collagen trimer [GO:0005581]		GDMGPPGPPGPEGR	0.94088	-0.92274	0	0	0	0	0	0	0	0	0	0	0	0	0	0	0	0	0	0	0	0	0	0	0	0	0	0	0	0	0	0	0	0	0	0	0	0	0	0	0	0
A0A669AXE6	Vav guanine nucleotide exchange factor 1	VAV1	Oreochromis niloticus (Nile tilapia) (Tilapia nilotica)	intracellular signal transduction [GO:0035556]		guanyl-nucleotide exchange factor activity [GO:0005085]; metal ion binding [GO:0046872]	IRQNQLKGNISVR	0.98711	-1.8836	0	0	0	0	0	0	0	0	0	0	0	0	0	0	0	0	0	0	0	0	0	0	0	0	0	0	0	0	0	0	0	0	0	0	0	0	0	0	0	0
A0A669AXF0	Baculoviral IAP repeat containing 6		Oreochromis niloticus (Nile tilapia) (Tilapia nilotica)	apoptotic process [GO:0006915]; regulation of cytokinesis [GO:0032465]		ubiquitin-protein transferase activity [GO:0004842]	TRLTDIVR	0.97797	-1.587	0	0	0	10.458	0	0	0	0	0	0	0	0	0	0	0	0	0	0	0	0	0	0	0	0	0	0	0	0	0	0	0	0	0	0	0	0	0	0	11.7096	0
A0A669AXG5	Hypoxia inducible factor 1 subunit alpha inhibitor	hif1an	Oreochromis niloticus (Nile tilapia) (Tilapia nilotica)				WDIAYLK	0.95994	-1.5073	0	0	9.08768	0	8.61043	0	0	0	0	0	0	0	0	0	0	0	0	0	0	0	0	0	0	0	0	0	0	0	0	0	0	0	0	0	0	0	0	0	0	0
A0A669AXN5	WD repeat and SOCS box containing 1	wsb1	Oreochromis niloticus (Nile tilapia) (Tilapia nilotica)	intracellular signal transduction [GO:0035556]; protein ubiquitination [GO:0016567]			VIVWDHDK	0.96014	-1.4755	0	0	0	8.56251	0	0	0	0	0	0	0	0	0	0	0	0	0	0	0	0	0	0	0	0	0	0	0	0	0	0	0	0	0	0	0	0	0	0	0	0
A0A669AXQ6	N-acetylglucosamine-1-phosphate transferase subunits alpha and beta	gnptab	Oreochromis niloticus (Nile tilapia) (Tilapia nilotica)		membrane [GO:0016020]	calcium ion binding [GO:0005509]; transferase activity, transferring phosphorus-containing groups [GO:0016772]	LQDTFADSLR	0.92596	-0.58346	0	0	0	0	0	0	0	0	0	0	0	0	0	0	0	0	0	0	0	0	0	0	0	0	0	0	0	0	0	0	0	0	0	0	0	0	0	0	0	0
A0A669AXR8	Eukaryotic translation initiation factor 2A (eIF-2A)		Oreochromis niloticus (Nile tilapia) (Tilapia nilotica)			translation initiation factor activity [GO:0003743]	MAPPVPLLAVR	0.95569	-1.4563	0	0	0	0	0	0	0	0	0	0	0	0	0	0	0	0	0	0	0	0	0	0	0	0	0	0	0	0	0	0	0	0	0	0	0	0	0	0	0	0
A0A669AXS4	CCR4-NOT transcription complex subunit 10		Oreochromis niloticus (Nile tilapia) (Tilapia nilotica)	regulation of translation [GO:0006417]; RNA-mediated gene silencing [GO:0031047]	CCR4-NOT complex [GO:0030014]; cytoplasm [GO:0005737]; nucleus [GO:0005634]		NGKGEYK	0.98473	-1.6243	0	0	0	0	0	10.4635	0	0	0	0	0	0	0	0	0	0	0	0	0	0	0	0	0	0	0	0	0	0	0	0	0	0	0	0	0	0	0	0	0	0
A0A669AXS5	Reverse transcriptase domain-containing protein		Oreochromis niloticus (Nile tilapia) (Tilapia nilotica)				FKEIQYKILHR	0.99349	-3.6896	0	0	0	9.37632	0	0	0	0	0	0	0	0	0	0	0	13.0625	0	0	0	0	0	0	0	0	0	0	0	0	0	0	0	0	0	0	0	0	0	0	0	0
A0A669AY45	Complement component c3a, duplicate 5		Oreochromis niloticus (Nile tilapia) (Tilapia nilotica)		extracellular space [GO:0005615]	endopeptidase inhibitor activity [GO:0004866]	KQSFPDSLQK	0.98444	-1.6393	0	0	0	0	0	0	0	0	0	0	0	0	0	0	0	0	0	0	0	0	0	0	0	0	0	0	0	0	0	0	0	0	0	0	0	0	0	0	0	0
A0A669AY55	protein disulfide-isomerase (EC 5.3.4.1)	txndc5	Oreochromis niloticus (Nile tilapia) (Tilapia nilotica)		endoplasmic reticulum lumen [GO:0005788]	protein disulfide isomerase activity [GO:0003756]	EFPGFTDVKIAKVDCTVER	0.92966	-0.59379	0	0	0	0	0	0	0	0	0	0	0	0	0	0	0	0	0	0	0	0	0	0	0	0	0	0	0	0	0	0	0	0	0	0	0	0	0	0	0	0
A0A669AY62	Myosin-10	LOC100690099	Oreochromis niloticus (Nile tilapia) (Tilapia nilotica)	system development [GO:0048731]	myosin complex [GO:0016459]	actin binding [GO:0003779]; ATP binding [GO:0005524]; cytoskeletal motor activity [GO:0003774]	EMEAELEDERK	0.98537	-1.6129	0	0	0	0	0	0	0	0	0	0	0	0	0	0	0	0	0	0	0	0	0	0	0	0	0	0	0	0	0	0	0	0	0	0	0	0	0	0	0	0
A0A669AYC2	Eukaryotic translation initiation factor 2 alpha kinase 1	eif2ak1	Oreochromis niloticus (Nile tilapia) (Tilapia nilotica)	protein phosphorylation [GO:0006468]	cytoplasm [GO:0005737]	ATP binding [GO:0005524]; protein kinase activity [GO:0004672]	GSYGNVFK	0.99532	-2.71	0	0	0	0	0	8.60229	0	0	9.29004	0	0	0	9.11673	0	0	0	0	0	0	0	0	0	0	0	0	0	0	0	0	0	0	0	0	0	0	0	0	0	0	0
A0A669AYE3	SAM domain, SH3 domain and nuclear localization signals 1	samsn1	Oreochromis niloticus (Nile tilapia) (Tilapia nilotica)		cellular anatomical entity [GO:0110165]		EISLTMRRK	0.93907	-0.9275	0	0	0	0	0	0	0	0	0	0	0	0	0	0	0	0	0	0	0	0	0	0	0	0	0	0	0	0	0	0	0	0	0	0	0	0	0	10.737	0	0
A0A669AYJ5	Tripartite motif-containing protein 16-like		Oreochromis niloticus (Nile tilapia) (Tilapia nilotica)			zinc ion binding [GO:0008270]	RYKPCPHHPDR	0.9501	-1.1448	0	0	0	0	0	0	0	0	0	0	0	0	0	0	0	0	0	0	0	0	0	0	0	0	0	0	0	0	0	0	0	0	0	0	0	0	0	0	0	0
A0A669AYJ9	Ig-like domain-containing protein		Oreochromis niloticus (Nile tilapia) (Tilapia nilotica)				NGNISLK	0.96882	-1.5073	0	0	0	0	0	0	0	0	0	0	0	0	10.6911	0	10.7411	0	0	0	0	0	0	0	0	0	0	0	0	0	0	0	0	0	0	11.2336	0	0	0	0	0	0
A0A669AYK5	Nck-associated protein 5	NCKAP5	Oreochromis niloticus (Nile tilapia) (Tilapia nilotica)				DKDCLDLDAGYGTALAPQK	0.99762	-2.1906	0	0	0	0	0	0	0	0	0	0	0	0	0	0	0	0	0	0	0	0	0	0	0	0	0	0	0	0	0	0	0	0	0	0	9.61254	0	0	0	0	0
A0A669AYY9	NACHT domain-containing protein		Oreochromis niloticus (Nile tilapia) (Tilapia nilotica)				SDRSKDQQPDFSAEPGLTR	0.81046	-0.51947	0	0	0	0	0	0	0	0	0	0	0	0	0	0	0	0	0	0	0	0	0	0	0	0	0	0	0	0	0	0	0	0	0	0	0	0	0	0	0	0
A0A669AZ02	Origin recognition complex subunit 3	orc3	Oreochromis niloticus (Nile tilapia) (Tilapia nilotica)	DNA replication [GO:0006260]	nuclear origin of replication recognition complex [GO:0005664]	DNA binding [GO:0003677]	LGEIRECLYKICLPELSEVR	0.94177	-0.79238	0	0	0	0	10.3433	0	0	0	0	0	0	0	0	0	0	0	0	0	0	0	0	0	0	0	0	0	0	0	0	0	0	0	0	0	0	0	0	0	0	0
A0A669AZ08	Zgc:162324		Oreochromis niloticus (Nile tilapia) (Tilapia nilotica)				QTSSDECRTPAK	0.97868	-1.5796	0	0	0	0	0	0	0	0	0	0	0	0	0	0	0	0	0	0	0	0	0	0	0	0	0	0	0	0	0	0	0	0	0	0	0	0	0	0	0	0
A0A669AZ20	Tyrosine-protein kinase (EC 2.7.10.2)		Oreochromis niloticus (Nile tilapia) (Tilapia nilotica)			ATP binding [GO:0005524]; non-membrane spanning protein tyrosine kinase activity [GO:0004715]	MGCVRSKEDK	0.9306	-1.0135	0	0	0	0	0	10.2105	0	0	0	0	0	0	0	0	0	0	0	0	0	0	0	0	0	0	0	0	0	0	0	0	0	0	0	0	0	0	0	0	0	0
A0A669AZ34	Extracellular serine/threonine protein kinase FAM20C	LOC100706789	Oreochromis niloticus (Nile tilapia) (Tilapia nilotica)		Golgi apparatus [GO:0005794]; membrane [GO:0016020]		KTWRNPWR	0.93837	-0.95262	0	0	0	9.31039	0	0	0	0	0	0	0	0	0	0	0	0	0	0	0	0	0	0	0	0	0	0	0	0	0	0	0	0	0	0	0	0	0	0	0	0
A0A669AZ59	Zinc finger protein 665	LOC109194461	Oreochromis niloticus (Nile tilapia) (Tilapia nilotica)				TFTQNVHLKK	0.99594	-2.6392	0	0	0	0	0	0	0	0	0	0	0	0	0	0	0	0	0	0	0	0	0	0	0	0	0	0	0	0	0	0	0	0	0	0	10.9692	0	0	0	0	0
A0A669AZ64	Olfactory receptor 52D1-like	LOC100693293	Oreochromis niloticus (Nile tilapia) (Tilapia nilotica)		membrane [GO:0016020]	G protein-coupled receptor activity [GO:0004930]; olfactory receptor activity [GO:0004984]	ILVALHIKR	0.98918	-1.8063	0	0	0	0	0	0	0	0	0	0	0	0	0	0	0	0	0	0	0	0	0	0	0	0	0	0	0	0	0	0	0	0	0	0	0	0	0	0	0	0
A0A669AZF2	Serine/threonine-protein phosphatase (EC 3.1.3.16)	LOC100706881	Oreochromis niloticus (Nile tilapia) (Tilapia nilotica)	cell division [GO:0051301]; glycogen metabolic process [GO:0005977]	cytoplasm [GO:0005737]	metal ion binding [GO:0046872]; myosin phosphatase activity [GO:0017018]	SALITVVK	0.96359	-1.482	0	0	0	0	0	0	0	0	0	0	0	0	0	0	10.3577	0	0	0	0	0	0	0	0	0	0	0	0	0	0	0	0	0	0	0	0	0	0	0	0	0
A0A669AZK3	Protein arginine methyltransferase 6		Oreochromis niloticus (Nile tilapia) (Tilapia nilotica)	peptidyl-arginine methylation [GO:0018216]		protein-arginine N-methyltransferase activity [GO:0016274]	MYPSEENAR	0.96167	-1.4736	0	0	0	0	0	0	0	0	0	0	0	0	0	0	0	0	0	0	0	0	0	0	0	0	0	0	0	0	0	0	0	0	0	0	0	10.02	0	0	0	0
A0A669AZM7	Linkage group 14 C3orf33 homolog	C3orf33	Oreochromis niloticus (Nile tilapia) (Tilapia nilotica)				GKVHSITEKGFK	0.99126	-2.1234	0	0	0	12.9257	0	0	0	0	0	0	0	0	0	0	0	0	0	0	0	0	0	0	0	0	0	0	0	0	0	0	0	0	0	0	0	0	0	0	0	0
A0A669AZU9	Mitogen-activated protein kinase (EC 2.7.11.24)	LOC102082809	Oreochromis niloticus (Nile tilapia) (Tilapia nilotica)	protein phosphorylation [GO:0006468]	cytoplasm [GO:0005737]	ATP binding [GO:0005524]; MAP kinase activity [GO:0004707]	QRLQFRPLVRVK	0.93487	-0.95455	0	0	0	0	10.9167	11.0116	0	0	0	11.0532	11.0612	0	11.0377	0	0	11.1172	0	11.0428	0	0	0	0	0	0	0	10.1566	10.2244	0	0	0	10.7589	0	0	0	0	0	10.7728	0	10.7221	0
A0A669B041	Cryptochrome-1	LOC100694525	Oreochromis niloticus (Nile tilapia) (Tilapia nilotica)				SLQSAIR	0	-0.10957	0	0	0	0	0	0	0	0	0	0	0	0	9.24911	9.42559	9.59208	0	0	0	0	0	0	0	0	0	0	0	0	0	0	0	0	0	0	0	0	8.43212	0	0	0	0
A0A669B087	Adenosine deaminase RNA specific	adar	Oreochromis niloticus (Nile tilapia) (Tilapia nilotica)	defense response to virus [GO:0051607]; RNA processing [GO:0006396]		double-stranded RNA adenosine deaminase activity [GO:0003726]; RNA binding [GO:0003723]	AAQSNPAVLVK	0.99517	-2.7231	0	0	0	0	0	0	0	0	0	9.50108	0	0	0	0	0	0	0	0	0	0	0	0	0	0	0	0	0	0	0	0	0	0	0	0	0	0	0	0	0	0
A0A669B091	Tetratricopeptide repeat domain 9	ttc9	Oreochromis niloticus (Nile tilapia) (Tilapia nilotica)				SQGTQCYKDK	0.96173	-1.4966	0	0	0	0	0	0	9.94206	0	0	0	0	0	0	0	0	0	0	0	0	0	0	0	0	0	0	0	0	0	0	0	0	0	0	0	0	0	0	0	0	0
A0A669B098	[histone H3]-trimethyl-L-lysine(4) demethylase (EC 1.14.11.67)	kdm5a	Oreochromis niloticus (Nile tilapia) (Tilapia nilotica)	chromatin organization [GO:0006325]	nucleus [GO:0005634]	DNA binding [GO:0003677]; histone H3K4me/H3K4me2/H3K4me3 demethylase activity [GO:0034647]; metal ion binding [GO:0046872]	QCVAHYRR	0.9949	-2.8631	0	0	0	0	0	0	0	0	0	0	0	0	0	0	0	0	0	0	0	0	0	0	0	0	0	0	0	0	0	9.9424	0	0	0	0	0	0	0	0	0	0
A0A669B0A4	PH and SEC7 domain-containing protein 1	LOC100697881	Oreochromis niloticus (Nile tilapia) (Tilapia nilotica)	regulation of ARF protein signal transduction [GO:0032012]	ruffle membrane [GO:0032587]	guanyl-nucleotide exchange factor activity [GO:0005085]; phospholipid binding [GO:0005543]	RYLDCNPK	0.99503	-2.7521	0	0	0	0	0	0	0	0	0	0	0	0	0	0	0	0	0	0	0	0	0	0	0	0	0	0	0	0	0	0	0	0	0	0	0	0	0	0	0	0
A0A669B0B1	Deleted in malignant brain tumors 1 protein	LOC100699270	Oreochromis niloticus (Nile tilapia) (Tilapia nilotica)		membrane [GO:0016020]	scavenger receptor activity [GO:0005044]	TTVALDER	0.98747	-1.8943	0	9.77085	0	0	0	0	0	0	0	0	0	0	0	0	0	0	0	0	0	0	0	0	0	0	0	0	0	0	0	0	0	0	0	0	0	0	0	0	0	0
A0A669B0F9	Uncharacterized protein		Oreochromis niloticus (Nile tilapia) (Tilapia nilotica)				DEYGMSMLER	0.99464	-2.986	9.29271	9.30841	9.36567	9.30513	9.38089	9.3537	9.21301	9.12539	9.25415	9.38556	0	0	0	0	0	0	0	0	0	0	0	0	0	0	0	0	0	0	0	0	0	0	0	0	0	0	0	0	0	0
A0A669B0H6	Chemokine interleukin-8-like domain-containing protein		Oreochromis niloticus (Nile tilapia) (Tilapia nilotica)	immune response [GO:0006955]; inflammatory response [GO:0006954]	extracellular space [GO:0005615]	chemokine activity [GO:0008009]	QVLKSKK	0.93469	-0.98403	0	0	0	0	0	0	0	0	0	0	10.7381	0	0	0	0	0	0	0	0	10.4613	0	0	0	0	0	0	0	11.0287	0	0	0	0	0	0	0	0	11.0507	0	0	0
A0A669B0I6	TIAM Rac1 associated GEF 1b		Oreochromis niloticus (Nile tilapia) (Tilapia nilotica)	activation of GTPase activity [GO:0090630]; small GTPase mediated signal transduction [GO:0007264]		guanyl-nucleotide exchange factor activity [GO:0005085]	QLSDADKLR	0.98619	-1.609	0	0	0	0	0	0	0	0	0	0	0	0	0	0	0	0	0	0	0	0	0	0	0	0	0	0	0	0	0	0	0	0	0	0	0	0	0	0	0	0
A0A669B0M6	Connector enhancer of kinase suppressor of ras 2	LOC100707937	Oreochromis niloticus (Nile tilapia) (Tilapia nilotica)	regulation of signal transduction [GO:0009966]	cytoplasm [GO:0005737]; membrane [GO:0016020]		DAGHGRDCR	0.97137	-1.5256	0	0	0	0	0	0	0	0	0	0	0	0	0	0	0	0	0	0	0	0	0	0	0	0	0	0	0	0	0	0	0	0	0	0	0	0	0	0	0	0
A0A669B0P9	WD repeat domain 37	WDR37	Oreochromis niloticus (Nile tilapia) (Tilapia nilotica)				ISVSVNQK	0.93563	-1.0981	8.93283	0	0	0	0	0	0	0	8.80848	0	0	0	0	0	0	0	0	0	0	0	0	0	0	0	0	0	0	0	0	0	0	0	0	0	0	0	0	0	0	0
A0A669B0V6	RNA helicase (EC 3.6.4.13)	YTHDC2	Oreochromis niloticus (Nile tilapia) (Tilapia nilotica)			ATP binding [GO:0005524]; hydrolase activity [GO:0016787]; nucleic acid binding [GO:0003676]; RNA helicase activity [GO:0003724]	ALKTSPPGVR	0.99433	-3.3426	0	0	0	0	8.63507	0	0	0	0	0	0	0	0	0	0	0	0	0	0	0	0	0	0	0	0	0	0	0	0	0	0	0	0	0	0	0	0	0	0	0
A0A669B0W3	Lysosome membrane protein 2	LOC100709098	Oreochromis niloticus (Nile tilapia) (Tilapia nilotica)		lysosome [GO:0005764]; membrane [GO:0016020]	scavenger receptor activity [GO:0005044]	EITLTEK	1.0084	-1.5073	0	0	0	0	0	0	0	0	0	0	0	0	0	0	0	0	0	0	0	0	0	0	0	0	0	0	0	0	0	0	0	0	0	0	0	0	0	0	0	0
A0A669B0X1	Zinc finger and BTB domain containing 40	zbtb40	Oreochromis niloticus (Nile tilapia) (Tilapia nilotica)				MLAHMKR	0.95187	-1.255	0	0	0	0	0	0	0	0	0	0	0	0	0	0	0	0	0	0	0	0	0	0	0	0	0	0	0	0	0	0	0	0	0	0	0	0	0	0	0	0
A0A669B0Z4	Nebulin-related anchoring protein		Oreochromis niloticus (Nile tilapia) (Tilapia nilotica)	animal organ development [GO:0048513]	cytoplasm [GO:0005737]	actin binding [GO:0003779]; metal ion binding [GO:0046872]	YRQLPDSLK	0.98359	-1.6237	0	0	0	0	0	0	0	0	0	0	0	0	0	0	0	0	0	0	0	0	0	0	0	0	0	0	0	0	0	0	0	0	9.2213	0	0	0	0	0	0	0
A0A669B156	Snurportin-1 (RNA U transporter 1)	snupn	Oreochromis niloticus (Nile tilapia) (Tilapia nilotica)	protein import into nucleus [GO:0006606]; snRNA import into nucleus [GO:0061015]	cytoplasm [GO:0005737]; nucleus [GO:0005634]	nuclear import signal receptor activity [GO:0061608]; RNA binding [GO:0003723]	DGNTEEEEMEIERR	0.99323	-3.2733	0	0	0	0	0	0	0	0	0	0	0	0	0	0	0	0	0	0	0	0	0	0	0	0	0	0	0	0	0	0	0	0	0	0	0	0	0	0	0	0
A0A669B1A9	Creatine kinase M-type	LOC100701380	Oreochromis niloticus (Nile tilapia) (Tilapia nilotica)	phosphocreatine biosynthetic process [GO:0046314]		creatine kinase activity [GO:0004111]	EVYGKLR	0.98326	-1.6243	0	0	0	0	0	0	0	0	0	0	0	0	0	0	0	0	0	0	0	0	0	0	0	0	0	0	0	0	0	0	0	0	0	0	0	0	0	0	0	0
A0A669B1F8	Uncharacterized protein		Oreochromis niloticus (Nile tilapia) (Tilapia nilotica)		membrane [GO:0016020]		GFCTRFK	0.99801	-2.3843	0	0	0	0	0	0	9.26754	0	0	8.72141	0	0	0	0	0	0	0	0	0	0	0	0	0	0	0	0	0	0	0	0	0	0	0	0	0	0	0	0	0	0
A0A669B1G8	Transmembrane protein 104	tmem104	Oreochromis niloticus (Nile tilapia) (Tilapia nilotica)		membrane [GO:0016020]		SVERSGQQR	0.95184	-1.4204	8.7268	0	0	0	0	0	0	0	0	0	0	0	0	0	0	0	0	0	0	0	0	0	0	0	0	0	0	0	0	0	0	0	0	0	0	0	0	0	0	0
A0A669B1L9	Synaptotagmin	LOC100700879	Oreochromis niloticus (Nile tilapia) (Tilapia nilotica)		chromaffin granule membrane [GO:0042584]; synaptic vesicle membrane [GO:0030672]	calcium ion binding [GO:0005509]; calcium-dependent phospholipid binding [GO:0005544]	INLLQNGK	0.95921	-1.466	0	0	0	0	0	0	0	0	0	0	0	0	0	0	0	0	0	0	0	0	0	0	0	0	0	0	0	0	0	0	0	0	0	0	0	0	0	0	0	0
A0A669B1Q7	Dual specificity protein phosphatase (EC 3.1.3.16) (EC 3.1.3.48)		Oreochromis niloticus (Nile tilapia) (Tilapia nilotica)	protein dephosphorylation [GO:0006470]	membrane [GO:0016020]	myosin phosphatase activity [GO:0017018]; protein tyrosine phosphatase activity [GO:0004725]; protein tyrosine/serine/threonine phosphatase activity [GO:0008138]	DALKHVVQKR	0.93575	-0.90815	0	0	0	0	0	0	0	0	0	0	0	0	0	0	0	0	0	0	0	0	0	0	0	0	0	0	0	0	0	10.123	0	0	0	0	0	0	0	0	0	0
A0A669B1T9	Trafficking protein particle complex subunit 2-like protein	trappc2l	Oreochromis niloticus (Nile tilapia) (Tilapia nilotica)	COPII vesicle coating [GO:0048208]; vesicle tethering [GO:0099022]	perinuclear region of cytoplasm [GO:0048471]; TRAPPII protein complex [GO:1990071]; TRAPPIII protein complex [GO:1990072]		ENYPLYIR	0.96271	-1.4803	0	0	0	0	0	0	0	0	0	0	0	0	0	0	0	0	0	0	0	0	0	0	0	0	0	0	0	0	0	0	0	0	0	0	0	0	0	0	0	0
A0A669B1X0	Ig-like domain-containing protein		Oreochromis niloticus (Nile tilapia) (Tilapia nilotica)		membrane [GO:0016020]		HDGNVNK	0.9985	-1.5073	0	0	0	0	11.8759	0	0	0	0	0	0	0	0	0	0	0	0	0	0	0	0	0	0	0	0	0	0	0	0	0	0	0	0	0	0	0	0	0	0	0
A0A669B219	protein-tyrosine-phosphatase (EC 3.1.3.48)		Oreochromis niloticus (Nile tilapia) (Tilapia nilotica)	protein dephosphorylation [GO:0006470]		MAP kinase tyrosine/serine/threonine phosphatase activity [GO:0017017]; myosin phosphatase activity [GO:0017018]	RGKPPGR	0.98658	-1.767	0	0	0	0	0	0	0	0	0	0	0	0	0	0	0	0	0	0	0	0	0	0	0	0	0	0	0	0	0	0	0	0	0	0	12.7249	0	0	0	0	0
A0A669B251	Lipopolysaccharide-induced tumor necrosis factor-alpha factor homolog	LOC100709546	Oreochromis niloticus (Nile tilapia) (Tilapia nilotica)		lysosomal membrane [GO:0005765]	metal ion binding [GO:0046872]	CNRVLHVEK	0.9603	-1.4723	0	0	0	0	0	0	0	0	0	0	0	0	0	0	0	0	0	0	0	0	0	0	0	0	0	0	0	0	0	0	0	0	0	0	0	0	0	0	0	0
A0A669B2B1	ABC transporter G family member 20	LOC100709572	Oreochromis niloticus (Nile tilapia) (Tilapia nilotica)		ATP-binding cassette (ABC) transporter complex [GO:0043190]	ABC-type transporter activity [GO:0140359]; ATP binding [GO:0005524]; ATP hydrolysis activity [GO:0016887]	GPANSTEMEVR	0.9969	-2.5804	0	0	0	0	0	0	0	0	0	0	0	0	0	0	0	0	0	0	0	0	0	0	0	0	0	0	0	0	0	0	0	0	0	0	0	0	0	0	0	0
A0A669B2B4	AP-1 complex subunit mu-1	LOC100711404	Oreochromis niloticus (Nile tilapia) (Tilapia nilotica)	intracellular protein transport [GO:0006886]; vesicle-mediated transport [GO:0016192]	clathrin adaptor complex [GO:0030131]		RKNTVCFIR	0.93419	-1.0076	0	0	0	10.2745	0	0	0	0	0	0	0	0	0	0	0	0	0	0	0	0	0	0	0	0	0	0	0	0	0	0	0	0	0	0	0	0	0	0	0	0
A0A669B2I0	RING finger protein B	LOC100708373	Oreochromis niloticus (Nile tilapia) (Tilapia nilotica)				VAVPPSVR	0.95632	-1.3907	13.0625	12.81	0	9.07714	11.688	11.9507	14.1916	13.9129	13.7665	11.1838	10.5736	10.577	0	12.1419	0	0	0	13.0475	11.5885	11.5187	11.3486	0	0	0	12.5588	0	0	0	0	10.0736	11.5156	0	0	11.3025	0	11.344	12.2747	12.1629	12.3421	0
A0A669B2Q7	NHR domain-containing protein		Oreochromis niloticus (Nile tilapia) (Tilapia nilotica)				PWPYSMR	0.95936	-1.5029	0	0	0	0	9.70411	0	0	0	8.3407	0	0	0	0	0	0	0	0	0	0	0	0	0	0	0	0	0	0	0	0	0	0	0	0	0	0	0	0	0	0	0
A0A669B2R6	Cyclin G associated kinase	gak	Oreochromis niloticus (Nile tilapia) (Tilapia nilotica)	protein phosphorylation [GO:0006468]	cytoplasm [GO:0005737]	ATP binding [GO:0005524]; protein kinase activity [GO:0004672]	LQAKMASMK	0.99612	-2.688	0	0	0	0	0	0	0	0	0	0	0	0	0	0	0	0	0	0	0	0	0	0	0	0	0	0	0	0	0	0	0	0	0	0	0	0	0	0	0	0
A0A669B2R8	Immunoglobulin heavy variable 6-1		Oreochromis niloticus (Nile tilapia) (Tilapia nilotica)				CDTMRGSNR	0.98293	-1.6479	0	0	0	0	0	0	0	0	0	0	0	0	0	0	0	0	0	0	0	0	0	0	0	0	0	0	0	0	0	0	0	0	0	0	0	0	0	0	0	0
A0A669B2T7	Teneurin transmembrane protein 3	TENM3	Oreochromis niloticus (Nile tilapia) (Tilapia nilotica)	anatomical structure development [GO:0048856]; signal transduction [GO:0007165]	cell projection [GO:0042995]; plasma membrane [GO:0005886]		ALSEPDTRAR	0.99287	-3.1576	0	0	0	0	0	0	0	0	0	0	0	0	0	9.88851	0	0	0	0	0	0	0	0	0	0	0	9.76075	0	0	0	0	0	0	0	0	0	0	0	0	0	0
A0A669B310	Multifunctional fusion protein [Includes: Delta-1-pyrroline-5-carboxylate dehydrogenase (P5C dehydrogenase) (L-glutamate gamma-semialdehyde dehydrogenase); L-glutamate gamma-semialdehyde dehydrogenase (EC 1.2.1.88)]	aldh4a1	Oreochromis niloticus (Nile tilapia) (Tilapia nilotica)	proline catabolic process to glutamate [GO:0010133]		1-pyrroline-5-carboxylate dehydrogenase activity [GO:0003842]	MADSWCR	1.0048	-1.5073	0	0	0	0	0	10.3599	0	0	0	0	0	0	0	0	0	0	0	0	0	0	0	0	0	0	0	0	0	0	0	0	0	0	0	0	0	0	0	0	0	0
A0A669B363	Calmodulin regulated spectrin associated protein family member 2	camsap2	Oreochromis niloticus (Nile tilapia) (Tilapia nilotica)	neuron projection development [GO:0031175]	cytoplasm [GO:0005737]; microtubule [GO:0005874]	calmodulin binding [GO:0005516]; microtubule binding [GO:0008017]; spectrin binding [GO:0030507]	RKSASFHSR	0.93227	-0.95665	0	0	0	0	0	0	0	0	0	0	0	0	0	0	0	0	0	0	0	0	0	0	0	0	0	0	0	0	0	0	0	0	0	0	0	0	0	9.94907	0	0
A0A669B392	Ig-like domain-containing protein		Oreochromis niloticus (Nile tilapia) (Tilapia nilotica)	adaptive immune response [GO:0002250]	membrane [GO:0016020]	signaling receptor activity [GO:0038023]	EDFTVGNSADKSR	0.98749	-1.7573	0	0	0	0	0	0	0	0	0	0	0	0	0	0	0	0	0	0	0	0	0	0	0	0	0	0	0	0	0	0	0	0	0	0	0	0	0	0	0	0
A0A669B3B7	6-phosphofructo-2-kinase/fructose-2,6-bisphosphatase 2	PFKFB2	Oreochromis niloticus (Nile tilapia) (Tilapia nilotica)	fructose 2,6-bisphosphate metabolic process [GO:0006003]; fructose metabolic process [GO:0006000]		6-phosphofructo-2-kinase activity [GO:0003873]; ATP binding [GO:0005524]; fructose-2,6-bisphosphate 2-phosphatase activity [GO:0004331]	NFYTFSLCVYLVLEHI	0.97268	-1.5509	0	0	0	0	8.99935	0	0	0	0	0	0	0	0	0	0	0	0	0	0	0	0	0	0	0	0	0	0	0	0	0	0	0	0	0	0	0	0	0	0	0
A0A669B3E0	PHD finger protein 21B	PHF21B	Oreochromis niloticus (Nile tilapia) (Tilapia nilotica)			metal ion binding [GO:0046872]	TVRQEEKR	0.94243	-0.87666	0	0	0	0	0	0	0	0	0	0	0	0	0	0	0	0	0	0	0	0	0	0	0	0	0	0	0	0	0	11.2348	0	0	0	0	0	0	0	0	0	0
A0A669B3E7	Protocadherin gamma-C5	LOC100711027	Oreochromis niloticus (Nile tilapia) (Tilapia nilotica)	homophilic cell adhesion via plasma membrane adhesion molecules [GO:0007156]	plasma membrane [GO:0005886]	calcium ion binding [GO:0005509]	SYDIDVTAKDK	0.95338	-1.3264	0	9.62253	0	0	0	0	0	0	0	0	0	0	0	0	0	0	0	0	0	0	0	0	0	0	0	0	0	0	0	0	0	0	0	0	0	0	0	0	0	0
A0A669B3F5	Thrombospondin, type I, domain containing 7Ab		Oreochromis niloticus (Nile tilapia) (Tilapia nilotica)		membrane [GO:0016020]		CMGSDCGLGGSQSR	0.99396	-3.8651	0	0	0	0	0	0	0	0	0	0	0	0	0	0	0	0	0	0	0	0	0	0	0	0	0	0	0	0	0	0	0	0	0	10.9868	0	0	0	0	0	0
A0A669B3G5	Serine/threonine kinase 32C	STK32C	Oreochromis niloticus (Nile tilapia) (Tilapia nilotica)	protein phosphorylation [GO:0006468]	cytoplasm [GO:0005737]	ATP binding [GO:0005524]; protein kinase activity [GO:0004672]	YAMKYMNK	0.96859	-1.5113	0	0	0	0	0	0	0	0	0	0	0	0	9.98783	10.0595	0	0	0	0	0	0	8.96385	9.28586	0	0	0	0	10.8684	0	0	0	0	0	0	0	0	0	0	0	0	0
A0A669B3J0	Cytoplasmic FMR1 interacting protein 2		Oreochromis niloticus (Nile tilapia) (Tilapia nilotica)	regulation of actin filament polymerization [GO:0030833]		small GTPase binding [GO:0031267]	KLPLAPE	0.95218	-1.255	0	0	0	9.1981	0	0	0	0	0	0	0	0	0	0	0	0	0	0	0	0	0	0	0	0	0	0	0	0	0	0	0	0	0	0	0	0	0	0	0	0
A0A669B3K4	PAT complex subunit Asterix (Protein associated with the ER translocon of 10kDa)	wdr83os	Oreochromis niloticus (Nile tilapia) (Tilapia nilotica)	protein insertion into ER membrane [GO:0045048]	endoplasmic reticulum membrane [GO:0005789]	protein folding chaperone [GO:0044183]	MLSNNMADPRR	0	0.49034	9.69209	0	0	0	0	0	0	0	0	8.19727	0	0	0	0	0	0	8.74218	0	0	0	0	0	0	0	0	0	9.25642	0	0	0	0	9.26695	0	0	0	0	9.31703	0	0	9.05645
A0A669B3K9	Heat shock protein 90 beta family member 1	hsp90b1	Oreochromis niloticus (Nile tilapia) (Tilapia nilotica)			ATP binding [GO:0005524]; ATP hydrolysis activity [GO:0016887]; ATP-dependent protein folding chaperone [GO:0140662]; unfolded protein binding [GO:0051082]	MKEKQDK	0.99106	-2.101	0	0	0	8.53609	0	0	0	0	0	0	0	0	0	0	0	0	0	0	0	0	9.08736	0	0	0	0	0	0	0	0	0	0	0	0	0	8.56453	0	0	0	0	0
A0A669B3R1	Myosin IE	myo1e	Oreochromis niloticus (Nile tilapia) (Tilapia nilotica)	system development [GO:0048731]	myosin complex [GO:0016459]	actin binding [GO:0003779]; ATP binding [GO:0005524]; cytoskeletal motor activity [GO:0003774]	NILLPERRR	0.91555	-0.66982	0	0	0	0	0	0	0	0	0	0	0	0	0	0	0	0	0	0	0	0	0	0	0	0	0	0	0	0	0	0	0	0	0	0	0	0	0	0	0	0
A0A669B3U6	XPC complex subunit, DNA damage recognition and repair factor	xpc	Oreochromis niloticus (Nile tilapia) (Tilapia nilotica)	nucleotide-excision repair [GO:0006289]	nucleus [GO:0005634]	damaged DNA binding [GO:0003684]	RMVNRYK	0.93141	-0.98403	0	0	0	0	0	0	0	0	0	0	0	0	0	0	0	0	0	0	0	0	0	0	0	0	0	0	0	0	0	0	0	0	0	0	0	0	0	0	0	0
A0A669B438	G-protein coupled receptors family 1 profile domain-containing protein		Oreochromis niloticus (Nile tilapia) (Tilapia nilotica)	chemotaxis [GO:0006935]	membrane [GO:0016020]	chemokine receptor activity [GO:0004950]	FQKHLLNLLR	0.98335	-1.6205	0	0	0	11.0692	0	0	0	0	8.84471	0	0	0	0	0	0	0	0	0	0	0	0	0	0	0	0	0	0	0	0	0	0	0	9.83534	0	0	10.1591	0	0	0	0
A0A669B477	Vacuolar protein sorting-associated protein 51 homolog		Oreochromis niloticus (Nile tilapia) (Tilapia nilotica)	endocytic recycling [GO:0032456]; Golgi organization [GO:0007030]; lipid transport [GO:0006869]; protein transport [GO:0015031]; retrograde transport, endosome to Golgi [GO:0042147]	cytosol [GO:0005829]; EARP complex [GO:1990745]; GARP complex [GO:0000938]		NVRAVMKR	0.99674	-2.5959	0	0	0	0	0	0	0	0	0	8.96154	0	0	0	0	0	0	0	0	0	0	0	0	0	0	0	0	0	0	0	0	0	0	0	0	0	0	0	10.8634	0	0
A0A669B496	Ras homolog, mTORC1 binding	rheb	Oreochromis niloticus (Nile tilapia) (Tilapia nilotica)				IVFYEGK	1.0063	-1.5073	0	0	0	0	14.1759	14.1295	0	0	0	0	0	0	0	0	0	0	0	0	0	0	0	0	0	0	0	0	0	0	0	0	0	0	0	0	0	0	0	0	0	0
A0A669B4C8	Serine palmitoyltransferase long chain base subunit 3	sptlc3	Oreochromis niloticus (Nile tilapia) (Tilapia nilotica)	biosynthetic process [GO:0009058]	membrane [GO:0016020]	pyridoxal phosphate binding [GO:0030170]; transferase activity [GO:0016740]	FCVSAAHTR	0.99452	-3.0516	0	0	0	0	0	0	0	0	0	0	0	0	0	0	9.57272	0	0	0	0	0	0	0	0	0	0	0	0	0	0	0	0	0	0	0	0	0	0	0	0	0
A0A669B4G6	Uncharacterized protein		Oreochromis niloticus (Nile tilapia) (Tilapia nilotica)				LTSNLGNANK	0.92904	-0.59667	9.18391	9.16063	8.98131	0	0	0	10.0778	9.9475	0	0	0	0	0	0	0	9.58933	9.46432	9.51615	0	0	0	0	0	0	9.49161	9.40782	9.61408	0	0	0	0	0	0	0	0	0	0	0	0	0
A0A669B4I3	non-specific serine/threonine protein kinase (EC 2.7.11.1)	raf1	Oreochromis niloticus (Nile tilapia) (Tilapia nilotica)	cell development [GO:0048468]; protein phosphorylation [GO:0006468]; signal transduction [GO:0007165]	cytoplasm [GO:0005737]	ATP binding [GO:0005524]; metal ion binding [GO:0046872]; protein serine/threonine kinase activity [GO:0004674]	VYLPNQQR	0.95962	-1.4755	0	0	0	9.74995	0	0	0	0	0	0	0	0	0	0	0	0	0	0	0	0	0	0	0	0	0	0	0	0	0	0	0	0	0	0	0	0	0	0	0	0
A0A669B4K3	Pogo transposable element derived with ZNF domain b		Oreochromis niloticus (Nile tilapia) (Tilapia nilotica)				RLGNQLAK	0.98909	-1.7025	0	0	0	0	0	0	0	0	0	10.7035	0	0	0	0	0	0	11.1051	0	0	0	9.39881	0	0	0	0	0	0	0	0	0	0	0	0	0	0	0	0	0	0	0
A0A669B4N8	Transmembrane channel-like protein		Oreochromis niloticus (Nile tilapia) (Tilapia nilotica)		plasma membrane [GO:0005886]		RKAANEER	0.93462	-0.95204	0	0	0	0	0	0	0	0	0	0	0	0	0	0	0	0	0	0	0	0	0	0	0	0	0	0	0	0	0	0	0	0	0	0	0	0	0	9.34176	0	0
A0A669B4R6	Tubulin tyrosine ligase like 9	ttll9	Oreochromis niloticus (Nile tilapia) (Tilapia nilotica)	protein modification process [GO:0036211]		ATP binding [GO:0005524]	EGFRSVSERSCVR	0.9961	-2.6423	0	0	0	0	0	0	0	0	0	0	0	0	0	0	0	0	0	0	0	0	0	0	0	0	0	0	0	0	0	0	0	0	8.80864	0	0	0	0	0	0	0
A0A669B4T3	TSC22 domain family protein 3	TSC22D3	Oreochromis niloticus (Nile tilapia) (Tilapia nilotica)	regulation of transcription by RNA polymerase II [GO:0006357]			NHLMYAVR	0.96027	-1.4722	0	0	0	0	0	9.51562	0	0	0	0	0	0	0	0	0	0	0	0	0	0	0	0	0	0	0	0	0	0	0	0	0	0	0	0	0	0	0	0	0	0
A0A669B4V5	DCC netrin 1 receptor		Oreochromis niloticus (Nile tilapia) (Tilapia nilotica)		membrane [GO:0016020]		VTVAGPLK	0.95863	-1.4702	0	0	0	9.64165	0	0	0	0	0	0	0	0	0	0	0	0	0	0	0	0	0	0	0	0	0	0	0	0	0	0	0	0	0	0	0	0	0	0	0	0
A0A669B4Y1	Chemokine-like receptor 1	LOC102076817	Oreochromis niloticus (Nile tilapia) (Tilapia nilotica)		membrane [GO:0016020]	G protein-coupled receptor activity [GO:0004930]	RSSTLAR	0.94326	-1.1874	0	0	0	0	0	0	0	0	0	0	10.4596	0	0	0	0	0	0	0	0	0	0	0	0	0	0	0	0	0	0	0	0	0	0	0	0	0	0	0	0	0
A0A669B4Z7	ABC-type glutathione-S-conjugate transporter (EC 7.6.2.3)		Oreochromis niloticus (Nile tilapia) (Tilapia nilotica)		plasma membrane [GO:0005886]	ABC-type transporter activity [GO:0140359]; ATP binding [GO:0005524]; ATP hydrolysis activity [GO:0016887]	TYAAVDK	1.0025	-1.5073	0	0	0	0	0	0	0	0	0	0	0	0	0	0	0	0	0	0	0	0	0	0	0	0	0	0	0	0	0	0	0	0	0	0	0	0	0	0	0	0
A0A669B504	RAB, member RAS oncogene family-like 6b		Oreochromis niloticus (Nile tilapia) (Tilapia nilotica)			GTP binding [GO:0005525]; GTPase activity [GO:0003924]	STLWHRLQGKK	0.93784	-0.93649	0	0	0	0	0	0	0	0	0	0	0	0	0	0	0	0	0	0	0	0	0	0	0	0	0	0	0	0	0	0	0	0	0	0	0	0	8.83599	0	0	0
A0A669B531	Glutathione synthetase (GSH-S) (EC 6.3.2.3)	gss	Oreochromis niloticus (Nile tilapia) (Tilapia nilotica)			ATP binding [GO:0005524]; glutathione binding [GO:0043295]; glutathione synthase activity [GO:0004363]; magnesium ion binding [GO:0000287]	IHQQILKEGR	0.98399	-1.6282	0	0	0	0	0	0	0	0	0	0	0	0	0	0	0	0	0	0	0	0	0	0	0	0	0	0	0	0	0	0	0	0	0	0	0	0	0	10.2392	0	0
A0A669B593	ADAMTS like 2	adamtsl2	Oreochromis niloticus (Nile tilapia) (Tilapia nilotica)	extracellular matrix organization [GO:0030198]	extracellular region [GO:0005576]		KQCRQISR	0.99785	-2.4014	0	0	8.57762	0	0	0	0	0	0	0	0	0	0	0	0	0	0	0	0	0	0	0	0	0	0	0	0	0	0	0	0	0	0	0	9.05994	9.45228	0	0	0	0
A0A669B5C6	Scribble planar cell polarity protein		Oreochromis niloticus (Nile tilapia) (Tilapia nilotica)				AEVDEDDEAAAER	0.98947	-1.9623	0	0	0	0	0	0	0	0	0	0	0	0	0	0	0	0	0	0	0	0	0	0	0	0	0	0	0	0	0	0	0	0	0	0	0	0	8.66025	9.96482	9.86623	0
A0A669B5J9	Transportin 2	tnpo2	Oreochromis niloticus (Nile tilapia) (Tilapia nilotica)	protein import into nucleus [GO:0006606]	cytoplasm [GO:0005737]; membrane [GO:0016020]	small GTPase binding [GO:0031267]	SLSGLILK	0.95988	-1.4759	0	0	0	0	0	0	0	0	0	0	0	0	0	0	0	0	0	0	0	0	0	0	0	0	0	0	0	0	0	0	0	0	0	0	0	0	0	0	10.7309	0
A0A669B5N5	Tyrosine specific protein phosphatases domain-containing protein		Oreochromis niloticus (Nile tilapia) (Tilapia nilotica)	protein dephosphorylation [GO:0006470]		protein tyrosine/serine/threonine phosphatase activity [GO:0008138]	VPIWSIK	0.9879	-1.5073	0	0	0	0	0	0	0	0	0	0	0	0	0	0	0	0	0	0	0	0	0	0	0	0	0	0	0	0	0	0	0	0	0	0	0	0	0	0	0	0
A0A669B5W6	Si:dkey-89b17.4		Oreochromis niloticus (Nile tilapia) (Tilapia nilotica)				AFRLARFLR	0.99658	-2.5938	0	0	0	14.0442	0	0	0	12.237	0	0	0	0	0	0	0	0	0	0	0	0	0	0	0	0	0	0	0	11.7007	0	0	0	0	0	0	0	0	0	0	0	0
A0A669B639	Hsp90 co-chaperone Cdc37 (Hsp90 chaperone protein kinase-targeting subunit) (p50Cdc37)	CDC37	Oreochromis niloticus (Nile tilapia) (Tilapia nilotica)		cytoplasm [GO:0005737]	protein kinase binding [GO:0019901]	EYEEEER	0.98937	-1.5073	0	0	0	0	10.4066	0	0	0	0	0	0	0	9.42501	0	0	0	0	0	0	0	0	0	0	0	0	0	0	0	0	0	0	0	0	0	0	0	0	0	0	0
A0A669B651	Matrix metalloproteinase-14	LOC100691693	Oreochromis niloticus (Nile tilapia) (Tilapia nilotica)	proteolysis [GO:0006508]	extracellular matrix [GO:0031012]; membrane [GO:0016020]	metalloendopeptidase activity [GO:0004222]; zinc ion binding [GO:0008270]	KYGTPRR	0.93632	-0.98403	0	0	0	0	0	0	0	10.9205	0	0	0	0	0	0	0	0	0	0	0	0	0	0	0	0	0	0	0	0	0	0	0	0	0	0	0	0	0	0	0	0
A0A669B6G1	P2Y purinoceptor 14	P2RY14	Oreochromis niloticus (Nile tilapia) (Tilapia nilotica)		membrane [GO:0016020]	G protein-coupled receptor activity [GO:0004930]	TFRESLLRK	0.93534	-1.0042	0	0	0	0	0	0	0	0	0	0	9.82345	0	0	0	0	0	0	0	0	0	0	0	0	0	0	0	0	0	0	0	0	0	0	0	0	0	0	0	0	0
A0A669B6G9	Ecotropic viral integration site 5 like	EVI5L	Oreochromis niloticus (Nile tilapia) (Tilapia nilotica)				LRELETLRSFR	0.94346	-0.85721	0	0	0	0	0	0	0	0	0	0	0	0	0	0	0	0	0	0	10.0353	0	0	0	0	0	0	0	0	0	0	0	0	0	0	0	0	0	0	0	0	0
A0A669B6K6	Cadherin-4	CDH4	Oreochromis niloticus (Nile tilapia) (Tilapia nilotica)	homophilic cell adhesion via plasma membrane adhesion molecules [GO:0007156]	plasma membrane [GO:0005886]	calcium ion binding [GO:0005509]	KQNTASLKK	0.93617	-0.95358	0	0	0	0	0	0	0	0	0	0	0	0	0	0	0	0	0	0	0	0	0	0	0	0	0	0	0	0	0	0	0	0	0	0	0	0	0	0	0	0
A0A669B6P6	Uncharacterized protein		Oreochromis niloticus (Nile tilapia) (Tilapia nilotica)				SFRRPSK	0.98285	-1.6243	0	0	0	0	0	0	0	0	0	0	0	0	0	0	0	0	0	0	0	0	0	0	0	0	0	0	0	0	0	0	0	0	0	0	0	0	0	0	0	0
A0A669B6R9	sn-1-specific diacylglycerol lipase (EC 3.1.1.116)	daglb	Oreochromis niloticus (Nile tilapia) (Tilapia nilotica)	lipid metabolic process [GO:0006629]			EAILVAVR	0.95813	-1.4687	0	0	0	0	0	0	0	0	0	0	0	0	0	0	0	0	0	0	0	0	0	0	0	0	0	0	0	0	0	0	0	0	0	0	0	0	0	0	13.1113	0
A0A669B6U4	RIB43A domain with coiled-coils 2		Oreochromis niloticus (Nile tilapia) (Tilapia nilotica)				AAAIATKDFNR	0.97026	-1.5161	0	0	0	0	0	0	0	0	0	0	0	0	0	0	0	0	0	0	0	0	0	0	0	0	0	0	0	0	0	0	0	0	0	0	0	0	0	0	8.91196	0
A0A669B715	Methyltransferase domain-containing protein		Oreochromis niloticus (Nile tilapia) (Tilapia nilotica)				VHLQWAGFEVAGRDEEVLR	0.91047	-0.55312	0	0	0	0	0	0	0	0	0	0	0	0	0	0	0	0	0	0	0	0	0	0	0	0	0	0	0	0	0	0	0	0	0	0	0	0	0	0	0	0
A0A669B724	Cationic amino acid transporter 2	LOC100689797	Oreochromis niloticus (Nile tilapia) (Tilapia nilotica)		plasma membrane [GO:0005886]	L-arginine transmembrane transporter activity [GO:0061459]	MAGVKMLK	0.97973	-1.5882	0	0	0	0	0	0	0	0	0	0	0	0	0	0	0	0	0	0	0	0	0	0	0	0	0	0	0	0	0	0	0	0	0	0	0	0	0	0	0	0
A0A669B741	Protein phosphatase 1 regulatory subunit 15A/B C-terminal domain-containing protein		Oreochromis niloticus (Nile tilapia) (Tilapia nilotica)	negative regulation of phosphate metabolic process [GO:0045936]; negative regulation of protein modification process [GO:0031400]	cytoplasm [GO:0005737]		AGKTSAYR	0.97793	-1.5656	0	0	0	0	0	0	0	0	0	0	0	0	0	0	0	0	0	0	0	0	0	0	0	0	0	0	0	0	0	0	0	0	0	0	0	0	0	0	0	0
A0A669B778	Mitogen-activated protein kinase kinase kinase 19		Oreochromis niloticus (Nile tilapia) (Tilapia nilotica)	protein phosphorylation [GO:0006468]	cytoplasm [GO:0005737]	ATP binding [GO:0005524]; protein kinase activity [GO:0004672]	SPCQPIPPPHRR	0.98882	-2.0024	9.52168	0	0	0	0	0	0	0	0	0	0	0	0	0	0	0	0	0	0	0	0	0	0	0	0	0	0	0	0	0	0	10.5087	0	0	0	0	0	12.4059	0	0
A0A669B7B4	Forkhead box protein L1	FOXL3	Oreochromis niloticus (Nile tilapia) (Tilapia nilotica)	system development [GO:0048731]	nucleus [GO:0005634]	DNA-binding transcription factor activity [GO:0003700]; sequence-specific DNA binding [GO:0043565]	RNMKIGLR	0.93573	-0.95225	0	0	0	0	0	0	0	0	0	0	0	0	0	9.7519	0	0	10.3375	0	0	0	0	0	0	0	0	0	0	0	0	0	0	0	0	0	0	0	0	0	0	0
A0A669B7E4	FIIND domain-containing protein		Oreochromis niloticus (Nile tilapia) (Tilapia nilotica)		cytoplasm [GO:0005737]		RKLNGDER	0.93811	-0.94703	0	10.3165	0	0	0	0	0	0	0	0	0	9.87234	0	0	0	0	0	0	0	0	0	0	0	0	0	0	0	0	0	0	11.3474	0	0	0	0	0	0	10.9839	0	0
A0A669B7G2	DnaJ homolog subfamily B member 9	LOC100706374	Oreochromis niloticus (Nile tilapia) (Tilapia nilotica)		membrane [GO:0016020]		MFTFDRHTK	0.38095	-0.4063	0	0	0	0	0	9.11938	0	0	0	0	0	0	0	0	0	0	0	0	0	0	0	0	0	0	0	10.3271	0	0	0	0	0	9.12203	0	8.64882	0	0	0	0	0	0
A0A669B7G9	DnaJ heat shock protein family (Hsp40) member C13	DNAJC13	Oreochromis niloticus (Nile tilapia) (Tilapia nilotica)	endosome organization [GO:0007032]; regulation of early endosome to late endosome transport [GO:2000641]			EMMLEHFKQQK	0.99293	-3.2843	0	9.50966	0	0	9.57075	9.70217	9.52832	9.38545	9.55919	10.286	0	0	8.54013	8.45755	0	0	0	0	0	0	8.47723	8.73254	0	0	0	8.51979	0	9.46189	8.66074	8.68696	0	0	0	8.85823	8.9526	0	9.52366	8.93631	0	0
A0A669B7K3	Collagen and calcium-binding EGF domain-containing protein 1	LOC100695086	Oreochromis niloticus (Nile tilapia) (Tilapia nilotica)		membrane [GO:0016020]	calcium ion binding [GO:0005509]	LRRFHSLEK	0.93314	-0.95033	0	0	0	0	0	9.40416	0	0	0	0	0	0	0	0	0	0	0	0	0	0	0	0	0	0	0	0	0	0	0	0	0	0	0	0	0	0	0	0	0	0
A0A669B7R3	Galactose mutarotase (EC 5.1.3.3) (Aldose 1-epimerase)	galm	Oreochromis niloticus (Nile tilapia) (Tilapia nilotica)	galactose metabolic process [GO:0006012]		aldose 1-epimerase activity [GO:0004034]; carbohydrate binding [GO:0030246]	GTPFDLR	0.98524	-1.5073	0	0	0	0	0	0	0	0	0	0	0	0	0	0	0	0	0	0	0	0	0	0	0	0	0	0	0	0	0	0	0	0	0	0	0	0	0	0	0	0
A0A669B817	RING-type E3 ubiquitin transferase (EC 2.3.2.27)		Oreochromis niloticus (Nile tilapia) (Tilapia nilotica)	protein ubiquitination [GO:0016567]		metal ion binding [GO:0046872]	HCMENHR	0.98572	-1.5073	0	0	0	0	0	0	0	0	10.5524	0	0	0	0	0	0	0	0	0	0	0	0	0	0	0	0	0	0	0	0	0	0	0	0	0	0	0	0	0	0	0
A0A669B833	Neutral ceramidase (EC 3.5.1.23)	asah2	Oreochromis niloticus (Nile tilapia) (Tilapia nilotica)	ceramide catabolic process [GO:0046514]		ceramidase activity [GO:0102121]; N-acylsphingosine amidohydrolase activity [GO:0017040]	YKWNTDK	0.9823	-1.6243	0	0	0	0	0	0	0	8.94477	0	0	0	0	0	0	0	0	0	0	0	0	0	0	0	0	0	0	0	0	0	0	0	0	0	0	0	0	0	0	0	0
A0A669B8F6	Patatin-like phospholipase domain-containing protein 7	LOC100705489	Oreochromis niloticus (Nile tilapia) (Tilapia nilotica)	lipid catabolic process [GO:0016042]	endoplasmic reticulum membrane [GO:0005789]	lysophospholipase activity [GO:0004622]; phosphatidyl phospholipase B activity [GO:0102545]	MASSVVTMSR	0.94966	-1.4161	0	0	0	8.57031	0	0	0	0	0	0	0	0	0	0	0	0	0	0	0	0	0	0	0	0	0	0	0	0	0	0	0	0	0	0	0	0	0	0	0	0
A0A669B8G0	Ig-like domain-containing protein		Oreochromis niloticus (Nile tilapia) (Tilapia nilotica)		cytoplasmic microtubule [GO:0005881]; membrane [GO:0016020]		FLEGSDVKMSCK	0.97142	-1.5266	0	0	0	0	0	0	0	0	0	0	0	0	0	0	0	0	0	0	0	0	0	0	0	0	0	0	0	0	0	0	0	0	0	0	0	0	0	0	0	0
A0A669B8H2	DNA-directed RNA polymerase III subunit RPC3 (RNA polymerase III subunit C3)	polr3c	Oreochromis niloticus (Nile tilapia) (Tilapia nilotica)	DNA-templated transcription [GO:0006351]	RNA polymerase III complex [GO:0005666]	single-stranded DNA binding [GO:0003697]	VGTHLLK	0.98669	-1.5073	0	0	0	0	0	0	0	0	0	0	0	0	0	0	0	0	0	0	0	0	0	0	0	0	0	0	0	0	0	0	0	0	0	0	0	0	0	0	0	0
A0A669B8I9	RNA helicase (EC 3.6.4.13)	dhx38	Oreochromis niloticus (Nile tilapia) (Tilapia nilotica)			ATP binding [GO:0005524]; hydrolase activity [GO:0016787]; nucleic acid binding [GO:0003676]; RNA helicase activity [GO:0003724]	ISRGSRR	0.94353	-0.80334	0	0	0	0	0	0	0	0	0	0	0	0	0	0	0	0	0	0	0	0	0	0	0	0	0	0	0	0	0	0	0	0	0	0	0	0	0	0	0	0
A0A669B8J3	Angiotensin-converting enzyme (EC 3.4.-.-)	ace2	Oreochromis niloticus (Nile tilapia) (Tilapia nilotica)	proteolysis [GO:0006508]	apical plasma membrane [GO:0016324]; cilium [GO:0005929]; cytoplasm [GO:0005737]; extracellular region [GO:0005576]	carboxypeptidase activity [GO:0004180]; metal ion binding [GO:0046872]; metallopeptidase activity [GO:0008237]; peptidyl-dipeptidase activity [GO:0008241]	RMRPLYEDYVDLKNEAAK	0	0.29998	0	0	0	12.8989	12.9674	12.7714	0	13.9568	13.7836	0	0	0	13.151	0	0	13.8176	0	13.2854	0	11.7642	12.4989	0	0	0	11.2536	0	11.0705	0	0	0	0	0	0	0	0	0	0	11.06	10.7736	11.4851
A0A669B8N3	Spectrin alpha, non-erythrocytic 1	sptan1	Oreochromis niloticus (Nile tilapia) (Tilapia nilotica)	actin filament capping [GO:0051693]	cell cortex [GO:0005938]; cytoskeleton [GO:0005856]	actin binding [GO:0003779]; calcium ion binding [GO:0005509]; calmodulin binding [GO:0005516]	NMAASRR	0.9864	-1.767	0	11.2989	0	0	0	0	0	0	0	0	0	11.08	0	0	0	0	0	0	0	0	0	9.99746	0	10.0037	0	0	9.96953	11.5035	0	0	0	11.3324	0	0	0	0	0	0	0	0
A0A669B8V1	Terpene cyclase/mutase family member (EC 5.4.99.-)	LOC100690152	Oreochromis niloticus (Nile tilapia) (Tilapia nilotica)	triterpenoid biosynthetic process [GO:0016104]	lipid droplet [GO:0005811]	intramolecular transferase activity [GO:0016866]	RRGGPYK	0.93635	-0.98403	0	0	0	0	0	0	0	0	0	0	0	0	0	0	0	0	0	0	0	0	0	0	0	0	9.65037	0	0	0	0	0	0	0	0	0	0	0	0	0	0	10.817
A0A669B8W1	Calcium/calmodulin-dependent protein kinase IGa		Oreochromis niloticus (Nile tilapia) (Tilapia nilotica)	protein phosphorylation [GO:0006468]	cytoplasm [GO:0005737]	ATP binding [GO:0005524]; protein kinase activity [GO:0004672]	KTGKMYALK	0.93887	-0.98917	0	0	0	0	9.51928	0	0	0	0	0	0	0	0	0	0	0	0	0	0	0	0	0	0	0	0	0	0	0	0	0	0	0	0	0	0	0	0	0	0	0
A0A669B8X8	Signal peptide peptidase like 2A	SPPL2A	Oreochromis niloticus (Nile tilapia) (Tilapia nilotica)		endosome membrane [GO:0010008]; lysosomal membrane [GO:0005765]	aspartic-type endopeptidase activity [GO:0004190]	VNISLALMRHR	0.97814	-1.5745	0	0	0	0	0	0	0	0	0	0	0	0	0	0	0	0	0	0	0	0	0	0	0	0	0	0	0	0	0	0	0	0	0	0	0	0	9.41365	0	0	0
A0A669B965	F-box protein 15	fbxo15	Oreochromis niloticus (Nile tilapia) (Tilapia nilotica)				AASKGVVPGRALR	0.99416	-2.9701	0	0	0	0	0	0	0	0	0	0	0	0	0	0	0	0	0	0	0	0	0	0	0	0	0	0	0	0	0	0	0	0	0	0	0	0	0	0	0	0
A0A669B971	Nidogen 1	nid1	Oreochromis niloticus (Nile tilapia) (Tilapia nilotica)	animal organ development [GO:0048513]; cell-matrix adhesion [GO:0007160]	basement membrane [GO:0005604]; extracellular region [GO:0005576]; membrane [GO:0016020]	calcium ion binding [GO:0005509]	RPFLQVSR	0.95717	-1.4542	0	0	0	0	0	0	0	0	0	0	0	0	0	0	0	0	0	0	0	0	0	0	0	0	0	0	0	0	0	0	0	0	0	0	0	0	0	0	0	0
A0A669B9H4	Cadherin-6	LOC100701150	Oreochromis niloticus (Nile tilapia) (Tilapia nilotica)	homophilic cell adhesion via plasma membrane adhesion molecules [GO:0007156]	plasma membrane [GO:0005886]	calcium ion binding [GO:0005509]	ATVVNKWTGQK	0.97336	-1.547	0	0	0	9.00042	0	0	0	0	0	0	0	0	0	0	0	0	0	0	0	0	0	0	0	0	0	0	0	0	0	0	0	0	0	0	0	0	0	0	0	0
A0A669B9I9	SUN domain containing ossification factor		Oreochromis niloticus (Nile tilapia) (Tilapia nilotica)		membrane [GO:0016020]		ASKNLLGSATK	0.99446	-2.9518	0	9.05102	0	0	0	0	9.66137	0	0	0	0	0	0	0	0	0	0	0	0	0	0	0	0	0	0	0	0	0	0	0	0	0	0	0	0	0	0	0	0	0
A0A669B9J1	Protein Wiz	LOC100708337	Oreochromis niloticus (Nile tilapia) (Tilapia nilotica)				AGRSSPSLSR	0.96845	-1.5118	0	0	0	0	0	0	0	0	0	0	0	0	0	0	0	0	0	0	0	0	0	0	0	0	0	0	0	0	0	0	0	0	0	0	0	0	0	0	9.97628	0
A0A669B9P4	Zinc finger Y-chromosomal protein 1	LOC100691538	Oreochromis niloticus (Nile tilapia) (Tilapia nilotica)	regulation of DNA-templated transcription [GO:0006355]	nucleus [GO:0005634]	DNA binding [GO:0003677]; metal ion binding [GO:0046872]	KHSVSHRTK	0.93944	-0.93152	0	0	0	0	0	0	0	0	0	0	0	0	0	0	0	0	0	0	0	0	0	0	0	0	9.26697	0	0	0	0	0	0	0	0	0	0	0	0	0	0	0
A0A669B9S2	RNA-binding protein 5	RBM5	Oreochromis niloticus (Nile tilapia) (Tilapia nilotica)		nucleus [GO:0005634]	metal ion binding [GO:0046872]; RNA binding [GO:0003723]	TIAVHYSNR	0.95214	-1.3397	9.28563	0	0	0	0	0	0	0	0	0	0	0	0	0	0	0	0	0	0	0	0	0	0	0	0	0	0	0	0	0	0	0	0	0	0	0	0	0	0	0
A0A669BA52	DNA helicase (EC 3.6.4.12)	chd9	Oreochromis niloticus (Nile tilapia) (Tilapia nilotica)		nucleus [GO:0005634]	ATP binding [GO:0005524]; ATP-dependent chromatin remodeler activity [GO:0140658]; helicase activity [GO:0004386]; hydrolase activity [GO:0016787]	CVIIDEAHRLKNK	0.99578	-2.6625	0	0	0	0	0	0	0	0	0	0	0	0	0	0	0	0	0	0	0	0	0	0	0	0	0	0	0	0	0	0	0	0	0	0	0	0	0	0	0	0
A0A669BA71	Moesin b		Oreochromis niloticus (Nile tilapia) (Tilapia nilotica)		cytoplasm [GO:0005737]; cytoskeleton [GO:0005856]; plasma membrane [GO:0005886]	actin binding [GO:0003779]	FVIKPIDR	0.96066	-1.4755	0	0	0	0	0	0	0	0	0	0	0	0	0	0	0	0	0	0	0	0	0	0	0	0	0	0	0	0	0	0	0	0	0	0	0	0	0	0	0	0
A0A669BA80	Reverse transcriptase		Oreochromis niloticus (Nile tilapia) (Tilapia nilotica)	DNA integration [GO:0015074]		nucleic acid binding [GO:0003676]; zinc ion binding [GO:0008270]	HTLKEKYPK	0.99848	-2.2623	0	0	0	0	0	0	0	0	0	0	0	0	0	0	0	0	0	0	0	0	0	0	0	0	0	0	0	0	9.06426	0	0	0	0	0	0	0	0	0	0	0
A0A669BAB3	Mitogen-activated protein kinase kinase kinase (EC 2.7.11.25)	MAP3K12	Oreochromis niloticus (Nile tilapia) (Tilapia nilotica)	protein autophosphorylation [GO:0046777]	cytoplasm [GO:0005737]	ATP binding [GO:0005524]; MAP kinase kinase kinase activity [GO:0004709]	SRRGKPR	0.93652	-0.91609	0	0	12.0846	0	0	0	0	0	0	0	0	0	0	0	0	0	0	0	0	0	0	0	0	10.3376	0	0	0	0	0	0	0	0	0	0	0	0	0	0	0	0
A0A669BAC9	Malic enzyme	me1	Oreochromis niloticus (Nile tilapia) (Tilapia nilotica)			malate dehydrogenase (decarboxylating) (NAD+) activity [GO:0004471]; metal ion binding [GO:0046872]; NAD binding [GO:0051287]	ESVETEMHR	0.97862	-1.5572	0	0	0	0	0	0	0	0	9.3433	0	0	0	0	0	0	0	0	0	0	0	0	0	0	0	0	0	0	0	0	0	0	0	0	0	0	0	0	0	0	0
A0A669BAG4	NACHT domain-containing protein		Oreochromis niloticus (Nile tilapia) (Tilapia nilotica)				LAVEELSLVPKK	0.94154	-1.1816	0	0	0	0	0	0	0	0	0	0	0	0	0	0	0	0	0	0	0	0	0	0	0	0	0	0	0	0	0	0	0	0	0	0	0	0	0	0	0	0
A0A669BAJ2	Si:ch211-226m7.4		Oreochromis niloticus (Nile tilapia) (Tilapia nilotica)				AEGLPSK	0.99059	-1.5073	0	0	0	0	0	0	0	0	0	0	0	0	0	0	0	0	0	0	0	0	0	0	0	0	0	0	0	0	0	0	0	0	0	0	0	0	0	0	0	0
A0A669BAM8	propionate--CoA ligase (EC 6.2.1.17) (Propionate--CoA ligase)	acss3	Oreochromis niloticus (Nile tilapia) (Tilapia nilotica)	lipid metabolic process [GO:0006629]		acetate-CoA ligase activity [GO:0003987]; propionate-CoA ligase activity [GO:0050218]	VRLSYPLTL	0.98381	-1.634	0	0	0	0	0	0	0	0	0	0	0	0	0	0	0	0	0	0	0	0	0	0	0	0	0	0	0	0	0	0	0	0	0	0	0	0	0	0	0	0
A0A669BAY0	Solute carrier family 39 member 11	SLC39A11	Oreochromis niloticus (Nile tilapia) (Tilapia nilotica)		membrane [GO:0016020]	metal ion transmembrane transporter activity [GO:0046873]	QQEVAEQRGSSWRR	0.9354	-0.91392	0	0	0	0	0	0	0	0	0	0	0	0	0	0	0	0	0	0	0	0	0	0	0	0	0	0	0	0	0	0	0	0	0	0	0	0	0	0	0	0
A0A669BB15	ATP-dependent DNA helicase (EC 3.6.4.12)		Oreochromis niloticus (Nile tilapia) (Tilapia nilotica)	DNA recombination [GO:0006310]; DNA repair [GO:0006281]; telomere maintenance [GO:0000723]		ATP binding [GO:0005524]; DNA helicase activity [GO:0003678]; hydrolase activity [GO:0016787]	MGFVQRR	0.98663	-1.767	0	0	0	0	12.1817	0	0	0	0	0	0	0	0	0	0	0	0	0	0	0	0	0	0	0	0	0	0	0	0	0	0	0	0	0	0	0	0	0	0	0
A0A669BB62	Plectin b		Oreochromis niloticus (Nile tilapia) (Tilapia nilotica)	intermediate filament cytoskeleton organization [GO:0045104]	cytoskeleton [GO:0005856]	actin binding [GO:0003779]	DKVDECQK	0.92658	-0.62509	0	0	0	0	0	0	0	0	0	0	0	0	0	0	0	0	0	0	0	0	0	0	0	0	0	0	0	0	0	0	0	0	0	0	0	0	0	0	0	0
A0A669BB92	DNA helicase (EC 3.6.4.12) (ATP-dependent helicase ATRX)		Oreochromis niloticus (Nile tilapia) (Tilapia nilotica)	DNA repair [GO:0006281]	chromosome, telomeric region [GO:0000781]; nucleus [GO:0005634]	ATP binding [GO:0005524]; ATP hydrolysis activity [GO:0016887]; ATP-dependent chromatin remodeler activity [GO:0140658]; DNA binding [GO:0003677]; metal ion binding [GO:0046872]	QRSYAQK	0.98285	-1.6243	0	0	0	0	0	0	0	0	0	0	0	0	0	0	0	0	0	0	0	0	0	0	0	0	0	0	0	0	0	0	0	0	0	0	0	0	0	0	0	0
A0A669BBF6	E3 SUMO-protein ligase RanBP2	LOC100692890	Oreochromis niloticus (Nile tilapia) (Tilapia nilotica)	intracellular transport [GO:0046907]; protein peptidyl-prolyl isomerization [GO:0000413]		metal ion binding [GO:0046872]; peptidyl-prolyl cis-trans isomerase activity [GO:0003755]	CVSCGNGQWDCNACLVRNDASATECVSCK	0.98327	-1.6436	0	0	0	0	0	0	0	0	0	0	0	0	0	0	0	11.837	0	0	0	0	0	0	0	0	0	0	11.6035	0	0	0	0	0	11.7084	0	0	0	0	0	0	0
A0A669BBF8	Peptidase M12B domain-containing protein		Oreochromis niloticus (Nile tilapia) (Tilapia nilotica)	extracellular matrix organization [GO:0030198]; proteolysis [GO:0006508]	extracellular region [GO:0005576]; membrane [GO:0016020]	metal ion binding [GO:0046872]; metalloendopeptidase activity [GO:0004222]	VDSKMVHK	0.98515	-1.5909	0	0	0	0	0	0	0	0	0	0	0	0	0	0	0	0	0	0	0	0	0	0	0	0	0	0	0	0	0	0	0	0	0	0	0	0	0	0	0	0
A0A669BBH4	Heat shock protein family A (Hsp70) member 12B	hspa12b	Oreochromis niloticus (Nile tilapia) (Tilapia nilotica)				AVQKALGR	0.99329	-3.0985	0	0	0	0	0	0	0	0	0	0	0	0	0	0	0	0	0	0	0	0	0	0	0	0	0	0	0	0	0	0	0	0	0	0	0	0	0	0	0	0
A0A669BBJ5	Growth factor receptor-bound protein 10a		Oreochromis niloticus (Nile tilapia) (Tilapia nilotica)	signal transduction [GO:0007165]	cytoplasm [GO:0005737]		EPGRKSWK	0.99851	-2.4354	0	0	0	0	0	0	0	0	0	0	0	0	0	0	0	0	0	0	0	0	0	0	0	0	0	0	0	0	0	0	0	0	0	0	0	0	0	0	0	0
A0A669BBJ7	Apelin receptor B	LOC100690011	Oreochromis niloticus (Nile tilapia) (Tilapia nilotica)		membrane [GO:0016020]	G protein-coupled receptor activity [GO:0004930]	GEQSSAFPMR	0.92967	-1.0595	0	0	0	0	0	0	10.649	0	0	0	0	0	0	0	0	0	0	0	0	0	0	0	0	0	0	0	0	0	0	0	0	0	0	0	0	0	0	0	0	0
A0A669BBS2	Bridging integrator 3		Oreochromis niloticus (Nile tilapia) (Tilapia nilotica)	actin cortical patch localization [GO:0051666]; endocytosis [GO:0006897]	cytoplasm [GO:0005737]		QLLDEMPK	0.3125	-0.36174	0	0	0	0	0	0	0	10.1322	0	0	0	0	0	0	0	0	0	0	0	0	0	0	0	0	0	0	0	0	0	0	0	0	0	0	0	0	0	0	0	0
A0A669BBU8	AIG1-type G domain-containing protein		Oreochromis niloticus (Nile tilapia) (Tilapia nilotica)			GTP binding [GO:0005525]	QSLLPAGVLWLKLK	0.99308	-3.28	0	0	0	0	0	0	0	0	0	0	0	0	0	0	0	0	0	0	0	0	0	0	0	0	0	0	0	0	0	0	0	0	0	0	0	0	0	0	0	0
A0A669BC02	Arrestin C-terminal-like domain-containing protein		Oreochromis niloticus (Nile tilapia) (Tilapia nilotica)				SMPSSFK	0.99527	-1.5073	0	0	0	0	0	11.6961	0	0	0	0	0	0	0	0	0	0	0	0	0	0	0	0	0	0	0	0	0	0	0	0	0	0	0	0	0	0	0	0	0	0
A0A669BC03	Arf-GAP with coiled-coil, ANK repeat and PH domain-containing protein (Cnt-b) (Centaurin-beta)	acap2	Oreochromis niloticus (Nile tilapia) (Tilapia nilotica)		endosome membrane [GO:0010008]	GTPase activator activity [GO:0005096]; metal ion binding [GO:0046872]	HEVEAYIKAK	0.98176	-1.6504	0	0	0	0	0	0	0	0	0	0	0	0	0	0	0	0	0	0	0	0	0	0	0	0	0	0	0	0	0	0	0	0	0	0	0	0	9.73622	0	0	0
A0A669BC30	C2H2-type domain-containing protein		Oreochromis niloticus (Nile tilapia) (Tilapia nilotica)				GFTLKQLLR	0.98293	-1.6479	0	0	0	0	0	0	0	0	0	0	0	0	0	8.93826	0	0	0	0	0	0	0	0	0	0	0	0	0	0	0	0	0	0	0	0	0	0	0	0	0	0
A0A669BC63	PH domain and leucine rich repeat protein phosphatase 2	PHLPP2	Oreochromis niloticus (Nile tilapia) (Tilapia nilotica)				GKTQLHK	0.98361	-1.6243	0	0	0	0	0	0	0	0	0	0	0	0	0	0	0	0	0	0	0	0	0	0	0	0	0	0	0	0	0	0	0	0	0	0	0	0	0	0	0	0
A0A669BCA4	Histone deacetylase (EC 3.5.1.98)	hdac5	Oreochromis niloticus (Nile tilapia) (Tilapia nilotica)	chromatin organization [GO:0006325]; histone deacetylation [GO:0016575]; negative regulation of transcription by RNA polymerase II [GO:0000122]; response to stimulus [GO:0050896]	histone deacetylase complex [GO:0000118]	histone deacetylase activity [GO:0004407]; metal ion binding [GO:0046872]	EQQLQQELILLKQQQELQK	0.99819	-2.4811	0	0	0	0	0	0	0	0	0	0	0	0	0	0	0	0	0	0	0	0	0	0	0	0	0	0	0	0	0	0	0	0	0	0	0	0	0	0	0	0
A0A669BCC1	Guanylate cyclase (EC 4.6.1.2)		Oreochromis niloticus (Nile tilapia) (Tilapia nilotica)	intracellular signal transduction [GO:0035556]; protein phosphorylation [GO:0006468]	membrane [GO:0016020]	ATP binding [GO:0005524]; guanylate cyclase activity [GO:0004383]; protein kinase activity [GO:0004672]	ALPSVAAQLAVNR	0.99303	-3.1717	0	0	0	0	0	0	0	0	0	0	0	0	0	0	0	0	0	0	0	0	0	0	0	0	0	0	0	0	0	0	0	0	0	0	0	0	9.41365	0	0	0
A0A669BCE3	Replication factor C subunit 1	rfc1	Oreochromis niloticus (Nile tilapia) (Tilapia nilotica)	DNA repair [GO:0006281]; DNA replication [GO:0006260]	DNA replication factor C complex [GO:0005663]; nucleus [GO:0005634]	ATP binding [GO:0005524]; ATP hydrolysis activity [GO:0016887]; DNA binding [GO:0003677]; DNA clamp loader activity [GO:0003689]	DGRTPPGR	0.9991	-4.312	0	0	0	0	0	0	0	0	0	0	0	0	0	0	0	0	0	0	0	0	0	0	11.2413	0	0	0	0	0	0	0	0	0	0	0	0	0	0	0	0	0
A0A669BCL4	Transitional endoplasmic reticulum ATPase (EC 3.6.4.6) (Valosin-containing protein)	vcp	Oreochromis niloticus (Nile tilapia) (Tilapia nilotica)	autophagy [GO:0006914]		ATP binding [GO:0005524]; ATP hydrolysis activity [GO:0016887]; lipid binding [GO:0008289]	EKTHGEVERR	0.99346	-3.5218	0	0	0	0	0	0	0	0	0	0	0	0	0	0	0	0	0	0	0	0	0	0	0	0	0	0	0	0	0	0	0	0	0	0	0	0	0	0	0	0
A0A669BCM4	Autophagy protein 5	atg5	Oreochromis niloticus (Nile tilapia) (Tilapia nilotica)	macroautophagy [GO:0016236]	phagophore assembly site membrane [GO:0034045]		FDQFWAMNR	0.96203	-1.5055	0	0	0	0	0	0	0	0	0	8.21315	0	0	0	0	0	0	0	0	0	0	0	8.68755	0	0	0	0	0	0	0	0	0	0	0	0	0	0	0	0	0	0
A0A669BCP0	Anoctamin	LOC100696049	Oreochromis niloticus (Nile tilapia) (Tilapia nilotica)		membrane [GO:0016020]		FLKSPEVKK	0.96235	-1.4851	0	0	0	0	11.6378	0	0	0	0	0	0	0	0	0	0	9.22547	0	0	0	0	0	0	0	0	0	0	0	0	0	0	0	0	0	0	0	0	0	0	0	0
A0A669BCZ6	C2H2-type domain-containing protein		Oreochromis niloticus (Nile tilapia) (Tilapia nilotica)				GVKAYSCDQCDR	0.98578	-1.6114	9.2494	0	0	0	0	0	0	0	0	0	0	0	0	0	0	0	0	0	0	0	0	0	0	0	0	0	0	0	0	0	0	0	0	0	0	0	0	0	0	0
A0A669BD03	Furin-1	LOC100705046	Oreochromis niloticus (Nile tilapia) (Tilapia nilotica)	proteolysis [GO:0006508]	membrane [GO:0016020]	serine-type endopeptidase activity [GO:0004252]	TAFIKTQSAL	0.98929	-1.7024	0	0	0	0	0	0	0	0	0	0	0	0	0	0	0	0	0	0	0	0	0	0	0	0	0	0	0	0	0	0	0	0	0	0	0	0	0	0	0	0
A0A669BD97	Cysteine and serine rich nuclear protein 3	CSRNP3	Oreochromis niloticus (Nile tilapia) (Tilapia nilotica)		nucleus [GO:0005634]		EDCGCDCR	0.96309	-1.4825	9.25191	9.07722	0	10.2771	10.2363	10.2258	0	0	0	10.0474	0	0	0	0	0	0	0	0	0	0	0	0	0	0	0	0	0	0	0	0	0	0	0	0	0	0	0	0	0	0
A0A669BDI4	Myosin heavy chain, fast skeletal muscle	LOC100710639	Oreochromis niloticus (Nile tilapia) (Tilapia nilotica)	system development [GO:0048731]	myosin complex [GO:0016459]	actin filament binding [GO:0051015]; ATP binding [GO:0005524]; cytoskeletal motor activity [GO:0003774]	DEEIEQMK	0.95406	-1.461	0	0	0	0	0	0	0	0	0	0	0	0	0	0	0	0	0	0	0	0	0	0	0	0	0	0	0	0	0	0	0	0	0	0	0	0	0	0	0	0
A0A669BDI5	cAMP-dependent protein kinase (EC 2.7.11.11)	LOC100700452	Oreochromis niloticus (Nile tilapia) (Tilapia nilotica)	protein phosphorylation [GO:0006468]	cytoplasm [GO:0005737]	AMP-activated protein kinase activity [GO:0004679]; ATP binding [GO:0005524]; cAMP-dependent protein kinase activity [GO:0004691]	KVRGQLSCK	0.9301	-1.0109	0	0	0	0	0	0	9.69665	0	0	0	0	0	0	0	0	0	0	0	0	0	0	0	0	0	0	0	0	0	0	0	0	0	0	0	0	0	0	0	0	0
A0A669BDT1	THO complex 1	thoc1	Oreochromis niloticus (Nile tilapia) (Tilapia nilotica)	signal transduction [GO:0007165]			TVLLIKK	0.98566	-1.767	0	0	0	0	0	0	0	0	0	0	0	0	0	0	0	0	0	0	0	0	0	0	0	0	0	0	0	0	0	0	0	0	0	0	0	0	0	0	0	0
A0A669BDX5	Endoplasmic reticulum oxidoreductase 1 alpha	ero1a	Oreochromis niloticus (Nile tilapia) (Tilapia nilotica)	protein folding in endoplasmic reticulum [GO:0034975]	endoplasmic reticulum membrane [GO:0005789]	FAD binding [GO:0071949]; protein-disulfide reductase activity [GO:0015035]; thiol oxidase activity [GO:0016972]	YDDEAER	0.98718	-1.5073	0	0	0	0	0	0	0	0	0	0	0	0	0	0	0	0	0	0	0	0	0	0	0	0	0	0	0	0	0	0	0	0	0	0	0	0	0	0	0	0
A0A669BDZ6	RNA helicase (EC 3.6.4.13)	LOC100708206	Oreochromis niloticus (Nile tilapia) (Tilapia nilotica)			ATP binding [GO:0005524]; hydrolase activity [GO:0016787]; nucleic acid binding [GO:0003676]; RNA helicase activity [GO:0003724]	IVEQDTMPPK	0.99463	-2.9644	0	0	0	0	0	0	0	0	0	0	0	0	0	0	0	0	0	0	0	0	0	0	0	0	0	0	0	0	0	0	0	0	0	0	0	0	0	0	0	0
A0A669BE21	Scm polycomb group protein homolog 1	SCMH1	Oreochromis niloticus (Nile tilapia) (Tilapia nilotica)	regulation of DNA-templated transcription [GO:0006355]	nucleus [GO:0005634]		GPKPGSKRKPR	0.99516	-2.7117	0	0	0	0	0	0	0	0	0	0	0	0	0	0	0	0	0	0	0	0	0	0	0	0	0	0	0	0	9.18753	0	0	0	0	0	0	0	0	0	0	0
A0A669BE44	Leucine rich repeat containing G protein-coupled receptor 4	lgr4	Oreochromis niloticus (Nile tilapia) (Tilapia nilotica)		plasma membrane [GO:0005886]	G protein-coupled receptor activity [GO:0004930]	EDWLRLR	0.98381	-1.6243	0	0	0	0	0	0	0	0	0	0	0	0	0	0	0	0	0	0	0	0	0	0	0	0	0	0	0	0	0	0	0	0	0	0	0	0	0	0	0	0
A0A669BE64	CD209 antigen-like protein E	LOC102081526	Oreochromis niloticus (Nile tilapia) (Tilapia nilotica)		membrane [GO:0016020]		SDNPTYSRNR	0.98397	-1.6245	0	0	0	0	0	0	0	0	0	0	0	0	0	0	0	0	0	0	0	0	0	0	0	0	0	0	0	0	0	0	0	0	0	0	0	0	0	9.11434	0	0
A0A669BE94	Alpha-actinin-4	ACTN4	Oreochromis niloticus (Nile tilapia) (Tilapia nilotica)			actin binding [GO:0003779]; calcium ion binding [GO:0005509]	LERLEHLAVK	0.98375	-1.6205	0	0	0	0	0	0	0	0	0	9.49173	0	0	0	0	0	0	0	0	0	0	0	0	0	0	0	0	0	0	0	0	0	0	0	0	0	0	0	0	0	0
A0A669BEA5	Cholesterol side-chain cleavage enzyme, mitochondrial (EC 1.14.15.6) (Cholesterol desmolase)		Oreochromis niloticus (Nile tilapia) (Tilapia nilotica)	C21-steroid hormone metabolic process [GO:0008207]; cholesterol metabolic process [GO:0008203]; steroid biosynthetic process [GO:0006694]	mitochondrial inner membrane [GO:0005743]	cholesterol monooxygenase (side-chain-cleaving) activity [GO:0008386]; heme binding [GO:0020037]; iron ion binding [GO:0005506]	LHPVAVSLQR	0.95564	-1.4007	0	0	0	0	0	0	0	0	0	0	0	0	0	0	0	0	0	0	0	0	0	0	0	0	0	0	0	0	0	0	0	0	0	0	0	0	0	11.0342	0	0
A0A669BEB0	Myosin-10	LOC100699125	Oreochromis niloticus (Nile tilapia) (Tilapia nilotica)	system development [GO:0048731]	myosin complex [GO:0016459]	actin filament binding [GO:0051015]; ATP binding [GO:0005524]; cytoskeletal motor activity [GO:0003774]	EMEAELEDERK	0.99418	-3.3475	0	0	0	0	0	0	10.1245	0	10.0853	0	0	0	0	0	0	0	9.54328	0	0	0	0	0	0	0	9.28619	9.34804	9.37706	0	0	0	8.66306	8.73234	0	0	0	0	8.58316	0	0	0
A0A669BEB1	KRIT1 ankyrin repeat containing	krit1	Oreochromis niloticus (Nile tilapia) (Tilapia nilotica)		cytoskeleton [GO:0005856]		QGFLNEENLK	0.96215	-1.4918	0	0	0	0	0	0	0	0	0	0	0	0	0	0	0	0	0	0	0	0	0	0	0	0	0	0	0	0	0	0	0	0	0	0	0	0	0	0	0	0
A0A669BEL6	RNA binding motif protein 26	rbm26	Oreochromis niloticus (Nile tilapia) (Tilapia nilotica)			metal ion binding [GO:0046872]; RNA binding [GO:0003723]	DSGKLKYDHER	0.97791	-1.5739	0	0	0	0	0	0	0	0	0	0	0	0	0	0	0	0	0	0	0	0	0	8.85674	0	0	0	0	9.80636	0	0	0	0	0	0	0	0	0	0	0	0	0
A0A669BEN5	Glutamate rich 3	erich3	Oreochromis niloticus (Nile tilapia) (Tilapia nilotica)				DSEEAEQDQNGNK	0.98833	-2.0192	0	13.1582	0	0	0	0	0	0	0	0	0	0	0	0	0	0	0	0	0	0	0	0	0	0	0	12.2389	0	0	0	0	0	0	0	0	0	0	0	0	0	0
A0A669BEV7	O-acyltransferase	LOC100691118	Oreochromis niloticus (Nile tilapia) (Tilapia nilotica)		endoplasmic reticulum membrane [GO:0005789]	O-acyltransferase activity [GO:0008374]	LFLENLLR	0.95873	-1.4758	0	0	0	0	0	0	0	0	0	0	0	0	0	0	0	0	0	0	0	0	0	0	0	0	0	0	0	0	0	0	0	0	0	0	10.1977	0	0	0	0	0
A0A669BF89	Histone H4		Oreochromis niloticus (Nile tilapia) (Tilapia nilotica)		nucleosome [GO:0000786]; nucleus [GO:0005634]	DNA binding [GO:0003677]; protein heterodimerization activity [GO:0046982]; structural constituent of chromatin [GO:0030527]	DAGTYTEHAK	0.95357	-1.3335	0	0	0	0	0	0	0	0	0	0	0	0	0	0	0	0	0	0	0	0	0	0	0	0	0	0	0	0	0	0	0	0	0	0	0	0	0	0	0	0
A0A669BFF2	Zinc finger CCCH-type containing 3	zc3h3	Oreochromis niloticus (Nile tilapia) (Tilapia nilotica)			metal ion binding [GO:0046872]	QIELLQNLINK	0.95186	-1.43	0	0	0	0	0	0	0	0	0	0	0	0	0	0	0	0	0	0	0	0	0	0	0	0	0	0	0	0	0	0	0	0	0	0	0	0	0	0	0	0
A0A669BFH1	GTP binding protein 2b		Oreochromis niloticus (Nile tilapia) (Tilapia nilotica)			GTP binding [GO:0005525]; GTPase activity [GO:0003924]	TAEEICESSSK	0.94092	-1.1838	0	0	0	0	0	0	0	0	0	0	0	0	0	0	0	0	0	0	0	0	0	0	0	0	0	0	0	0	0	0	0	0	0	0	0	0	0	0	0	0
A0A669BFH9	Methylcytosine dioxygenase TET (EC 1.14.11.n2)		Oreochromis niloticus (Nile tilapia) (Tilapia nilotica)	5-methylcytosine catabolic process [GO:0006211]; DNA demethylation [GO:0080111]	chromosome [GO:0005694]; nucleus [GO:0005634]	DNA binding [GO:0003677]; methylcytosine dioxygenase activity [GO:0070579]; zinc ion binding [GO:0008270]	KTDGINQR	0.99593	-2.6054	0	0	0	0	0	0	0	0	0	0	0	0	0	0	0	0	0	0	0	0	0	0	0	0	0	0	0	0	0	0	0	0	0	0	0	0	0	0	0	0
A0A669BFI1	Phosphoinositide phospholipase C (EC 3.1.4.11)	plcd1	Oreochromis niloticus (Nile tilapia) (Tilapia nilotica)	intracellular signal transduction [GO:0035556]; lipid catabolic process [GO:0016042]		calcium ion binding [GO:0005509]; phosphatidylinositol phospholipase C activity [GO:0004435]	SIVDPLVK	0.95714	-1.4542	0	0	0	0	0	0	0	0	0	0	0	0	0	0	0	0	0	0	0	0	0	0	0	0	0	0	0	0	0	0	0	0	0	0	0	0	0	0	0	0
A0A669BFI2	G protein-coupled receptor 158	gpr158	Oreochromis niloticus (Nile tilapia) (Tilapia nilotica)		plasma membrane [GO:0005886]	G protein-coupled receptor activity [GO:0004930]	GGPVGAAKKADVCPWDFEDSTSSK	0.98812	-1.8429	10.9012	10.7217	10.8107	9.45496	9.39086	9.38379	11.9569	11.8036	11.7735	0	0	0	10.1775	10.3706	10.4545	11.0486	10.9364	10.8491	9.32751	9.33116	9.4402	10.2503	10.0934	10.0438	11.2097	11.1024	11.0334	0	0	0	9.94045	10.1303	10.0753	8.93967	8.88185	9.1014	9.8707	10.0021	9.8885	0
A0A669BFM5	Inhibitor of nuclear factor kappa-B kinase subunit alpha (EC 2.7.11.10) (Nuclear factor NF-kappa-B inhibitor kinase alpha)		Oreochromis niloticus (Nile tilapia) (Tilapia nilotica)		cytoplasm [GO:0005737]; nucleus [GO:0005634]	ATP binding [GO:0005524]; IkappaB kinase activity [GO:0008384]	YETLTTK	0.99157	-1.5073	0	0	0	0	0	0	0	0	0	13.3379	0	0	0	0	0	0	10.5094	0	0	0	0	0	0	0	0	0	0	0	0	0	0	0	0	0	0	0	0	0	0	0
A0A669BFN2	Down syndrome cell adhesion molecule like 1		Oreochromis niloticus (Nile tilapia) (Tilapia nilotica)	axon guidance [GO:0007411]; cell adhesion [GO:0007155]	plasma membrane [GO:0005886]		NVAVPIPHR	0.99468	-3.0502	0	0	0	0	10.3968	0	0	0	0	0	0	0	0	0	0	0	0	0	0	0	0	0	0	0	0	0	0	0	0	0	0	0	8.49797	0	0	0	0	0	0	0
A0A669BFP5	Reverse transcriptase domain-containing protein		Oreochromis niloticus (Nile tilapia) (Tilapia nilotica)				HGITAICK	0.9633	-1.4813	0	0	0	0	0	0	0	0	0	0	0	0	0	0	0	0	0	0	0	0	0	0	0	0	0	0	0	0	11.0662	0	0	0	0	0	0	0	0	0	0	0
A0A669BG02	Sodium channel protein	SCN4A	Oreochromis niloticus (Nile tilapia) (Tilapia nilotica)	regulation of ion transmembrane transport [GO:0034765]	voltage-gated sodium channel complex [GO:0001518]	calcium ion binding [GO:0005509]; voltage-gated ion channel activity [GO:0005244]; voltage-gated sodium channel activity [GO:0005248]	HLLLRGK	0.98321	-1.6243	11.568	0	0	0	0	0	0	0	0	0	0	0	0	0	0	0	0	0	0	0	0	0	0	0	0	0	0	0	0	0	0	0	0	0	0	0	0	0	0	0
A0A669BG21	Adenylosuccinate synthetase (AMPSase) (AdSS) (EC 6.3.4.4) (IMP--aspartate ligase)	LOC100691320	Oreochromis niloticus (Nile tilapia) (Tilapia nilotica)	'de novo' AMP biosynthetic process [GO:0044208]	cytoplasm [GO:0005737]	adenylosuccinate synthase activity [GO:0004019]; GTP binding [GO:0005525]; magnesium ion binding [GO:0000287]	LDILDVFTKIKVGIGYK	0.99104	-2.0879	0	0	0	0	0	0	0	0	0	0	0	0	0	0	0	0	0	0	0	0	0	0	0	0	0	0	0	0	0	0	0	0	0	0	0	0	10.4067	0	0	0
A0A669BGB7	calcium/calmodulin-dependent protein kinase (EC 2.7.11.17)	LOC100695450	Oreochromis niloticus (Nile tilapia) (Tilapia nilotica)	protein phosphorylation [GO:0006468]	cytoplasm [GO:0005737]	ATP binding [GO:0005524]; calmodulin binding [GO:0005516]; calmodulin-dependent protein kinase activity [GO:0004683]	ISTGQEYAAK	0.95503	-1.4413	0	0	9.36807	0	0	0	0	0	0	0	0	0	0	0	0	0	0	0	0	0	0	0	0	0	0	0	0	0	0	0	0	0	0	0	0	0	0	0	0	0
A0A669BGK8	Kinesin-like protein	KIF5C	Oreochromis niloticus (Nile tilapia) (Tilapia nilotica)	microtubule-based movement [GO:0007018]; system development [GO:0048731]	microtubule [GO:0005874]	ATP binding [GO:0005524]; microtubule binding [GO:0008017]; microtubule motor activity [GO:0003777]	AARGKIQSL	0.93137	-0.96873	0	0	0	0	0	0	0	0	0	0	0	0	0	0	0	0	0	0	0	0	0	0	0	0	0	0	0	0	0	0	0	0	0	12.3633	0	0	0	0	0	0
A0A669BGL6	Collagen alpha-2(VI) chain	LOC100700514	Oreochromis niloticus (Nile tilapia) (Tilapia nilotica)		cellular anatomical entity [GO:0110165]		GNSRLSR	0.99206	-3.1183	0	0	0	0	0	0	0	0	0	0	0	0	0	0	0	0	0	0	0	0	0	0	0	0	0	0	0	0	0	0	0	0	0	0	0	0	0	0	0	0
A0A669BGM6	Clustered mitochondria protein homolog		Oreochromis niloticus (Nile tilapia) (Tilapia nilotica)	mitochondrion organization [GO:0007005]	cytoplasm [GO:0005737]	RNA binding [GO:0003723]	GEEPAEDQKDGLCWMSHK	0.9831	-1.6461	0	0	0	0	0	0	0	0	0	0	0	0	0	0	0	0	0	0	0	0	0	0	0	0	0	0	0	0	0	0	0	0	0	0	0	0	0	0	0	0
A0A669BGN6	Protoporphyrinogen oxidase (EC 1.3.3.4)		Oreochromis niloticus (Nile tilapia) (Tilapia nilotica)	protoporphyrinogen IX biosynthetic process [GO:0006782]	mitochondrial inner membrane [GO:0005743]	oxygen-dependent protoporphyrinogen oxidase activity [GO:0004729]	ALSSVLPR	0.95531	-1.387	15.5361	0	0	0	0	0	16.6056	0	0	0	10.1384	0	0	0	0	0	0	0	0	0	0	0	0	14.0666	0	0	0	0	0	0	0	0	0	0	0	0	0	0	0	0
A0A669BGR3	Pre-mRNA processing factor 8	prpf8	Oreochromis niloticus (Nile tilapia) (Tilapia nilotica)	mRNA splicing, via spliceosome [GO:0000398]	spliceosomal complex [GO:0005681]	U5 snRNA binding [GO:0030623]; U6 snRNA binding [GO:0017070]	IKRHLLTQR	0.99504	-2.7974	0	0	0	0	0	0	0	0	0	0	0	0	0	0	0	0	0	0	0	0	0	0	0	0	0	0	0	0	0	0	0	0	0	0	0	0	0	0	0	0
A0A669BGS9	C2H2-type domain-containing protein		Oreochromis niloticus (Nile tilapia) (Tilapia nilotica)				TLRAQKR	0.93683	-0.98403	0	0	0	9.41781	0	0	0	0	0	0	0	0	0	0	0	0	0	0	0	0	0	0	0	0	0	0	0	0	0	0	0	0	0	0	0	0	0	0	0	0
A0A669BH09	Retinoblastoma-like protein 2	LOC100692495	Oreochromis niloticus (Nile tilapia) (Tilapia nilotica)	cell cycle [GO:0007049]; cell division [GO:0051301]; chromatin organization [GO:0006325]; regulation of cell cycle [GO:0051726]; regulation of transcription by RNA polymerase II [GO:0006357]	membrane [GO:0016020]; nucleus [GO:0005634]		TGETPTR	0.99255	-1.5073	0	0	0	0	0	0	0	0	0	0	0	0	0	0	0	0	11.3974	0	0	0	0	0	0	0	0	10.3673	0	0	0	0	0	0	0	0	0	0	0	0	0	0
A0A669BH16	acetyl-CoA carboxylase (EC 6.4.1.2)	acacb	Oreochromis niloticus (Nile tilapia) (Tilapia nilotica)	fatty acid biosynthetic process [GO:0006633]; malonyl-CoA biosynthetic process [GO:2001295]		acetyl-CoA carboxylase activity [GO:0003989]; ATP binding [GO:0005524]; metal ion binding [GO:0046872]	GHVIAAR	0.94893	-1.3024	0	0	0	0	0	0	0	0	0	0	0	0	0	0	11.9827	0	0	0	0	0	0	0	0	0	0	0	0	0	13.063	0	0	0	0	0	0	0	0	0	0	0
A0A669BH22	Si:ch211-156l18.7		Oreochromis niloticus (Nile tilapia) (Tilapia nilotica)		intermediate filament [GO:0005882]	structural molecule activity [GO:0005198]	AQYEAITDK	0.97358	-1.5461	0	0	0	0	0	0	0	8.58988	0	0	0	0	0	0	0	0	0	0	0	0	0	0	0	0	0	0	0	0	0	0	0	0	0	0	0	0	0	0	0	0
A0A669BH57	Formin binding protein 1 like	fnbp1l	Oreochromis niloticus (Nile tilapia) (Tilapia nilotica)	autophagy [GO:0006914]; endocytosis [GO:0006897]; signal transduction [GO:0007165]	cell cortex [GO:0005938]; plasma membrane [GO:0005886]		NCFQYWR	0.99447	-2.9656	0	0	0	0	0	0	0	0	10.2699	0	0	0	0	0	0	0	0	0	0	0	0	0	0	0	0	0	0	0	0	0	0	0	0	0	0	0	0	0	0	0
A0A669BHA7	Synaptic Ras GTPase activating protein 1b		Oreochromis niloticus (Nile tilapia) (Tilapia nilotica)	regulation of GTPase activity [GO:0043087]		GTPase activator activity [GO:0005096]	VVQNLANFSK	0.97358	-1.5464	0	0	0	0	0	0	0	0	0	0	0	0	0	0	0	0	0	0	0	0	0	0	0	0	0	0	0	0	0	0	0	0	0	0	0	0	0	0	0	0
A0A669BHB3	Dynein, axonemal, heavy chain 12		Oreochromis niloticus (Nile tilapia) (Tilapia nilotica)	microtubule-based movement [GO:0007018]	cilium [GO:0005929]; cytoplasm [GO:0005737]; dynein complex [GO:0030286]; microtubule [GO:0005874]	ATP binding [GO:0005524]; dynein intermediate chain binding [GO:0045505]; dynein light intermediate chain binding [GO:0051959]; minus-end-directed microtubule motor activity [GO:0008569]	QEHPIPETVGK	0.99555	-2.8965	0	0	0	0	0	0	0	0	0	0	0	0	0	0	0	0	0	0	0	0	0	0	0	0	0	0	0	0	0	0	0	0	0	0	0	0	0	0	0	10.5526
A0A669BHF6	Tc1-like transposase DDE domain-containing protein		Oreochromis niloticus (Nile tilapia) (Tilapia nilotica)			nucleic acid binding [GO:0003676]	LLKRDHQTIK	0.99818	-2.4452	0	0	0	0	0	0	0	0	0	0	0	0	0	0	0	0	0	0	0	0	0	0	0	0	0	0	0	0	0	0	0	0	0	9.03933	9.14234	0	0	0	0	0
A0A669BHQ5	SWI/SNF related, matrix associated, actin dependent regulator of chromatin, subfamily a, member 4	smarca4	Oreochromis niloticus (Nile tilapia) (Tilapia nilotica)	regulation of DNA-templated transcription [GO:0006355]	SWI/SNF superfamily-type complex [GO:0070603]	ATP binding [GO:0005524]; ATP-dependent chromatin remodeler activity [GO:0140658]; helicase activity [GO:0004386]; histone binding [GO:0042393]; hydrolase activity [GO:0016787]	LSPNPPSLTK	0.95812	-1.4685	0	0	0	0	0	0	0	0	0	0	0	0	0	0	0	0	0	0	0	0	0	0	0	0	0	0	0	0	0	0	0	0	0	0	9.25274	0	0	0	0	0
A0A669BHS8	Low density lipoprotein receptor-related protein 1Bb		Oreochromis niloticus (Nile tilapia) (Tilapia nilotica)	animal organ development [GO:0048513]; endocytosis [GO:0006897]	membrane [GO:0016020]	calcium ion binding [GO:0005509]	DCEDGYDEGVHCR	0.99659	-2.6357	12.8485	0	0	0	0	0	0	0	0	0	11.417	0	0	0	0	0	0	0	0	0	0	0	0	0	0	0	0	0	0	0	0	0	0	0	0	0	0	12.29	0	0
A0A669BHY5	HTH_Tnp_Tc3_2 domain-containing protein		Oreochromis niloticus (Nile tilapia) (Tilapia nilotica)	DNA integration [GO:0015074]; transposition, DNA-mediated [GO:0006313]		DNA binding [GO:0003677]	TPLLQPR	0.99706	-2.5803	13.0625	12.81	12.5548	0	11.688	11.9507	0	0	0	0	0	0	0	0	0	13.2981	0	0	11.5885	0	0	0	0	11.5345	0	0	0	0	8.35076	0	0	11.7911	0	11.3025	0	11.344	0	12.1629	12.3421	0
A0A669BI13	Reverse transcriptase domain-containing protein		Oreochromis niloticus (Nile tilapia) (Tilapia nilotica)				IGRKEHR	0.99583	-2.7668	0	0	0	0	0	0	0	0	0	0	0	0	8.68243	0	0	0	0	0	0	0	0	0	0	0	0	0	0	0	0	0	0	0	0	0	0	0	0	0	0	0
A0A669BI64	Macro domain-containing protein		Oreochromis niloticus (Nile tilapia) (Tilapia nilotica)				RQTVVPEK	0.98684	-1.7253	0	0	0	0	0	0	0	0	0	0	0	0	0	0	0	0	0	0	0	0	0	0	0	0	0	0	0	0	0	0	0	0	0	0	0	0	0	0	0	0
A0A669BI84	ELKS/RAB6-interacting/CAST family member 2		Oreochromis niloticus (Nile tilapia) (Tilapia nilotica)		cell junction [GO:0030054]; cytoplasm [GO:0005737]		LKDQRER	0.93125	-0.98403	0	0	0	0	0	0	0	0	0	0	0	0	0	0	0	0	0	0	0	0	0	0	0	0	0	0	0	0	0	0	0	0	0	0	0	0	0	0	0	0
A0A669BIB7	Peptidase S1 domain-containing protein		Oreochromis niloticus (Nile tilapia) (Tilapia nilotica)	proteolysis [GO:0006508]	extracellular space [GO:0005615]	serine-type endopeptidase activity [GO:0004252]	LIYLFTGVLK	0.93973	-0.73594	0	0	0	0	0	0	0	0	0	0	0	0	0	0	0	0	0	0	0	0	0	0	0	0	0	0	0	0	0	0	0	0	0	0	0	0	0	0	0	0
A0A669BIM7	Spartin	LOC100692187	Oreochromis niloticus (Nile tilapia) (Tilapia nilotica)				GLTADEAGDK	0.95076	-1.2231	0	0	0	0	0	0	0	0	0	0	0	0	0	0	0	0	0	0	0	0	0	0	0	0	0	0	0	0	0	0	0	0	0	0	0	0	0	0	0	0
A0A669BIR7	Reverse transcriptase domain-containing protein		Oreochromis niloticus (Nile tilapia) (Tilapia nilotica)	DNA metabolic process [GO:0006259]		metal ion binding [GO:0046872]; nucleic acid binding [GO:0003676]; RNA-DNA hybrid ribonuclease activity [GO:0004523]	VVPWWTR	0.99803	-2.4983	0	0	0	0	0	0	0	0	0	0	0	0	0	0	0	0	0	0	0	0	0	0	0	0	0	0	0	0	0	0	0	0	0	0	0	0	0	0	0	0
A0A669BIU3	Progestin and adipoQ receptor family member VI		Oreochromis niloticus (Nile tilapia) (Tilapia nilotica)		membrane [GO:0016020]		FLELQFPKR	0.98786	-1.7307	0	0	0	0	0	0	0	0	0	0	0	0	0	0	0	0	0	0	0	0	0	0	0	0	0	0	0	0	0	0	0	0	0	0	0	0	0	10.3073	0	0
A0A669BJ21	RIMS binding protein 2		Oreochromis niloticus (Nile tilapia) (Tilapia nilotica)				APMDMYSSK	0.99436	-3.4761	0	0	0	0	0	0	11.2786	0	0	0	0	0	0	0	0	0	0	0	0	0	0	0	0	0	0	0	0	0	0	0	0	0	0	0	0	0	0	10.5545	0	0
A0A669BJ59	Coagulation factor VIII	LOC100698479	Oreochromis niloticus (Nile tilapia) (Tilapia nilotica)	regulation of body fluid levels [GO:0050878]; regulation of response to external stimulus [GO:0032101]	extracellular region [GO:0005576]	copper ion binding [GO:0005507]; oxidoreductase activity [GO:0016491]	LDQSGYINAWMGK	0.98362	-1.6382	0	0	0	0	0	0	0	0	0	0	0	0	0	0	0	0	0	0	0	0	0	0	0	0	0	0	0	0	0	0	0	0	0	0	0	0	0	0	0	0
A0A669BJA6	RUN domain-containing protein 3A	LOC100703962	Oreochromis niloticus (Nile tilapia) (Tilapia nilotica)				KMEQRFK	0.93192	-0.98403	0	0	0	0	0	0	0	0	0	0	0	0	10.0418	0	0	0	0	0	0	0	9.85265	0	0	0	0	9.90384	0	0	0	0	0	0	0	0	0	0	0	0	0	0
A0A669BJH9	Trichohyalin	LOC100690222	Oreochromis niloticus (Nile tilapia) (Tilapia nilotica)			small GTPase binding [GO:0031267]	KEEEEQAKR	0.99699	-4.1084	0	0	0	8.59742	0	0	0	0	0	0	0	0	0	0	0	0	0	0	0	0	0	0	0	0	0	0	0	0	0	0	0	0	0	0	0	0	0	0	8.74823	0
A0A669BJK3	Misshapen-like kinase 1		Oreochromis niloticus (Nile tilapia) (Tilapia nilotica)	protein phosphorylation [GO:0006468]	cytoplasm [GO:0005737]	ATP binding [GO:0005524]; protein kinase activity [GO:0004672]	VYYLAWLRNK	0.98357	-1.6205	0	0	0	0	0	0	0	0	0	0	0	0	0	0	0	0	0	0	0	0	0	0	0	0	0	0	0	0	0	0	0	0	0	0	0	0	9.86454	0	0	0
A0A669BJL2	Complement component c3a, duplicate 5		Oreochromis niloticus (Nile tilapia) (Tilapia nilotica)		extracellular space [GO:0005615]	endopeptidase inhibitor activity [GO:0004866]	YGRYKTR	0.93252	-0.98403	0	0	0	0	0	13.6623	11.672	0	0	0	10.659	0	0	0	0	0	0	0	0	0	0	0	0	0	0	0	0	0	0	11.0003	0	0	0	0	0	0	0	11.6391	0	0
A0A669BK06	C-myc promoter-binding protein	DENND4A	Oreochromis niloticus (Nile tilapia) (Tilapia nilotica)		cytoplasm [GO:0005737]	guanyl-nucleotide exchange factor activity [GO:0005085]	SSTVSETESAK	0.98962	-2.0633	9.50892	9.4514	9.43515	0	0	0	0	10.2563	10.1965	0	0	0	0	8.94158	0	9.73383	9.6571	9.83856	0	0	0	8.89391	0	0	9.90668	9.89574	10.0154	0	0	0	0	0	0	0	0	0	0	0	0	0
A0A669BKB2	Coiled-coil domain containing 178	ccdc178	Oreochromis niloticus (Nile tilapia) (Tilapia nilotica)				AVKQMCEER	0.9548	-1.3822	0	0	0	0	0	0	0	0	0	0	0	0	0	0	0	0	0	0	0	0	0	0	0	0	0	0	0	0	0	0	0	0	0	0	0	0	0	0	0	0
A0A669BKI7	DEAH (Asp-Glu-Ala-His) box polypeptide 32b		Oreochromis niloticus (Nile tilapia) (Tilapia nilotica)			helicase activity [GO:0004386]	KELPVWK	0.98603	-1.767	11.3386	0	0	0	0	0	0	0	0	0	0	0	0	0	0	0	0	0	0	0	0	0	0	0	9.81065	0	0	0	0	0	0	0	0	0	0	0	0	0	0	0
A0A669BKQ2	Procollagen-lysine,2-oxoglutarate 5-dioxygenase 1	LOC100699058	Oreochromis niloticus (Nile tilapia) (Tilapia nilotica)		endoplasmic reticulum membrane [GO:0005789]	iron ion binding [GO:0005506]; L-ascorbic acid binding [GO:0031418]; procollagen-lysine 5-dioxygenase activity [GO:0008475]	LLVVTVATK	0.97812	-1.5735	0	0	0	0	0	0	0	0	0	0	0	0	0	0	0	0	0	0	0	0	0	0	0	0	0	0	0	0	0	0	0	0	0	0	0	0	0	0	0	0
A0A669BKV8	G protein-coupled receptor kinase (EC 2.7.11.-)	grk6	Oreochromis niloticus (Nile tilapia) (Tilapia nilotica)	protein phosphorylation [GO:0006468]; signal transduction [GO:0007165]	cytoplasm [GO:0005737]	ATP binding [GO:0005524]; G protein-coupled receptor kinase activity [GO:0004703]	DYSSLCER	0.99525	-2.9479	0	0	0	0	14.8177	0	0	0	0	0	0	0	0	0	0	0	0	0	0	0	0	0	0	0	0	0	0	0	0	0	0	0	0	0	10.1765	0	0	0	0	0
A0A669BL16	Tripartite motif containing 36	trim36	Oreochromis niloticus (Nile tilapia) (Tilapia nilotica)		cytoskeleton [GO:0005856]	zinc ion binding [GO:0008270]	SISSPGWRR	0.38182	-0.42389	0	0	0	0	0	0	0	0	0	0	0	0	0	0	0	0	0	0	0	0	0	0	0	0	0	0	0	0	0	0	0	0	0	0	0	0	0	0	0	0
A0A669BL55	MICAL-like protein 2	LOC102076226	Oreochromis niloticus (Nile tilapia) (Tilapia nilotica)				SQPKVETPKK	0.94246	-0.87747	0	0	0	9.54986	0	0	0	0	0	0	0	0	0	0	0	0	0	0	0	0	0	0	0	0	0	0	0	0	0	0	9.26111	0	0	0	0	0	0	9.17495	9.20548	0
A0A669BL87	Oxoglutarate dehydrogenase like		Oreochromis niloticus (Nile tilapia) (Tilapia nilotica)	tricarboxylic acid cycle [GO:0006099]		oxoglutarate dehydrogenase (succinyl-transferring) activity [GO:0004591]; thiamine pyrophosphate binding [GO:0030976]	NMGYYDYVRPR	0.99882	-2.26	0	0	0	0	9.13635	0	0	0	0	0	0	0	0	0	0	0	0	0	0	0	0	0	0	0	0	0	0	0	0	0	0	0	0	0	0	0	9.08138	0	0	0
A0A669BLA9	LIM homeobox 2	lhx2	Oreochromis niloticus (Nile tilapia) (Tilapia nilotica)	animal organ development [GO:0048513]	nucleus [GO:0005634]	DNA binding [GO:0003677]; DNA-binding transcription factor activity, RNA polymerase II-specific [GO:0000981]; metal ion binding [GO:0046872]	DSQYSSSQK	0.95396	-1.443	0	0	0	0	0	0	0	0	0	0	0	0	0	0	0	0	0	0	0	0	0	0	0	0	0	0	0	0	0	0	0	0	0	0	0	10.5114	0	0	0	0
A0A669BLC9	NLRC4_HD2 domain-containing protein		Oreochromis niloticus (Nile tilapia) (Tilapia nilotica)				LTAAVRNCR	0.95953	-1.4663	0	0	0	0	0	0	0	0	0	0	0	0	0	0	0	0	0	0	0	0	0	0	0	0	0	0	0	0	0	0	0	0	0	0	0	0	0	0	0	0
A0A669BLF2	Neuropilin	NRP1	Oreochromis niloticus (Nile tilapia) (Tilapia nilotica)	angiogenesis [GO:0001525]; axon guidance [GO:0007411]; regulation of plasma membrane bounded cell projection organization [GO:0120035]; regulation of response to external stimulus [GO:0032101]	membrane [GO:0016020]	heparin binding [GO:0008201]; metal ion binding [GO:0046872]; semaphorin receptor activity [GO:0017154]; vascular endothelial growth factor receptor activity [GO:0005021]	INGQTNYSEA	0.97454	-1.5367	0	0	0	0	0	0	0	0	0	0	0	0	0	0	0	0	0	0	0	0	0	0	0	0	0	0	0	0	0	0	0	0	0	0	0	0	0	0	0	0
A0A669BLF3	TRASH domain-containing protein		Oreochromis niloticus (Nile tilapia) (Tilapia nilotica)			zinc ion binding [GO:0008270]	TKPSIATQK	0.96168	-1.492	8.70266	0	0	0	0	0	0	0	0	0	0	0	0	0	0	0	0	0	0	0	0	0	0	0	0	0	0	0	0	0	0	0	0	0	0	0	0	0	0	0
A0A669BLM9	SWT1 RNA endoribonuclease homolog	swt1	Oreochromis niloticus (Nile tilapia) (Tilapia nilotica)				SASSPVKDDSQSTR	0.94676	-0.8403	0	0	0	0	0	0	0	0	0	0	0	0	0	0	0	0	0	0	0	0	0	0	0	0	0	0	0	0	0	0	0	0	0	0	0	0	0	0	0	0
A0A669BLN7	Uncharacterized LOC100712394	LOC100712394	Oreochromis niloticus (Nile tilapia) (Tilapia nilotica)		nascent polypeptide-associated complex [GO:0005854]		NNSTPRLSGK	0.99369	-3.2638	0	0	10.0798	0	0	0	0	0	10.6355	0	0	0	0	0	0	0	0	0	0	0	0	0	0	0	0	0	0	0	0	0	0	0	0	0	0	0	0	0	0	0
A0A669BLT4	receptor protein-tyrosine kinase (EC 2.7.10.1)	LOC100705478	Oreochromis niloticus (Nile tilapia) (Tilapia nilotica)		plasma membrane [GO:0005886]	ATP binding [GO:0005524]; transmembrane receptor protein tyrosine kinase activity [GO:0004714]	TLLSVGK	0.9928	-1.5073	0	0	0	0	0	0	0	0	0	0	10.2339	0	0	10.1988	10.1175	0	0	0	10.4231	0	10.1816	10.4335	0	10.3158	0	0	0	0	0	0	0	0	0	0	10.2102	0	0	10.2759	10.3436	0
A0A669BLX1	Regulator of G-protein signaling 6	LOC100709782	Oreochromis niloticus (Nile tilapia) (Tilapia nilotica)	G protein-coupled receptor signaling pathway [GO:0007186]; intracellular signal transduction [GO:0035556]; negative regulation of signal transduction [GO:0009968]; regulation of G protein-coupled receptor signaling pathway [GO:0008277]			SVVSVPLR	0.95435	-1.386	0	0	0	11.4927	0	11.3547	0	0	0	11.1797	9.75206	9.66784	0	0	0	0	0	0	0	0	0	0	0	0	0	0	0	0	0	0	0	0	10.6523	0	10.4502	0	0	0	0	0
A0A669BLX3	Olfactory receptor		Oreochromis niloticus (Nile tilapia) (Tilapia nilotica)		plasma membrane [GO:0005886]	G protein-coupled receptor activity [GO:0004930]; olfactory receptor activity [GO:0004984]	FYKIFKK	0.93438	-0.98403	0	0	0	0	0	0	0	0	0	0	0	0	0	0	0	0	0	0	0	0	0	0	0	0	0	0	0	0	0	8.87817	0	0	0	0	0	0	0	0	0	0
A0A669BM50	Integrase catalytic domain-containing protein		Oreochromis niloticus (Nile tilapia) (Tilapia nilotica)	DNA integration [GO:0015074]		nucleic acid binding [GO:0003676]	VHVVVKR	0.98584	-1.767	11.568	0	0	0	0	0	0	0	0	0	0	0	0	0	0	0	0	0	0	0	0	0	0	0	0	0	0	0	0	0	0	0	0	0	0	0	0	0	0	0
A0A669BM63	Sterile alpha motif domain-containing protein 9	LOC102077564	Oreochromis niloticus (Nile tilapia) (Tilapia nilotica)				KAEEKHLSVIK	0.98215	-1.6493	0	0	0	0	0	0	0	0	0	9.58092	0	0	0	0	0	0	0	0	0	0	0	0	0	0	0	0	0	0	0	0	0	0	0	0	0	0	0	0	0	0
A0A669BM71	YqaJ viral recombinase domain-containing protein		Oreochromis niloticus (Nile tilapia) (Tilapia nilotica)				TSLLGFAR	0.9577	-1.4542	0	0	0	0	0	0	0	0	0	0	0	0	0	0	0	0	0	0	0	0	0	0	0	0	0	0	0	0	0	0	0	0	0	0	0	0	0	0	0	0
A0A669BM82	CSC1-like protein 2	LOC100709232	Oreochromis niloticus (Nile tilapia) (Tilapia nilotica)		membrane [GO:0016020]	calcium activated cation channel activity [GO:0005227]; nucleic acid binding [GO:0003676]	DMQLVGYC	0.99321	-3.2366	12.0634	0	0	0	0	0	0	0	12.2578	0	0	0	0	0	0	9.98741	0	0	0	0	0	0	0	0	0	0	0	0	0	0	0	0	0	10.8037	0	0	0	0	11.7831	11.2646
A0A669BMF3	Reverse transcriptase domain-containing protein		Oreochromis niloticus (Nile tilapia) (Tilapia nilotica)				IAAITPILKK	0.94806	-1.2891	0	0	0	0	0	0	0	0	0	0	0	0	0	0	0	0	0	0	0	0	0	0	0	0	0	0	0	0	0	0	0	0	0	0	9.23915	0	0	0	0	0
A0A669BMH3	Phosphodiesterase (EC 3.1.4.-)		Oreochromis niloticus (Nile tilapia) (Tilapia nilotica)	signal transduction [GO:0007165]		3',5'-cyclic-nucleotide phosphodiesterase activity [GO:0004114]; metal ion binding [GO:0046872]	ALYTVRTYLQCER	0.95129	-1.3416	0	0	0	0	0	0	0	0	0	0	0	0	0	0	0	0	0	0	0	0	0	0	0	0	0	0	0	0	0	0	0	0	0	0	0	0	0	0	0	0
A0A669BMH4	Dynein cytoplasmic 2 heavy chain 1	DYNC2H1	Oreochromis niloticus (Nile tilapia) (Tilapia nilotica)	microtubule-based movement [GO:0007018]	cytoplasm [GO:0005737]; dynein complex [GO:0030286]; microtubule [GO:0005874]; plasma membrane [GO:0005886]	ATP binding [GO:0005524]; dynein intermediate chain binding [GO:0045505]; dynein light intermediate chain binding [GO:0051959]; minus-end-directed microtubule motor activity [GO:0008569]	IAALGANLK	1.0002	-4.4412	0	0	0	11.9832	11.9403	0	0	0	0	0	0	0	0	0	0	0	0	0	0	0	0	0	0	0	0	0	0	0	0	0	0	0	0	0	0	0	0	0	0	0
A0A669BMH6	von Willebrand factor A domain containing 2	vwa2	Oreochromis niloticus (Nile tilapia) (Tilapia nilotica)	anatomical structure development [GO:0048856]			QELKKQIK	0.94283	-0.87097	0	0	8.70047	10.2099	10.321	8.85562	9.30435	9.68317	9.32968	0	0	0	0	0	0	0	0	0	0	0	0	0	0	0	0	0	0	0	0	0	0	0	0	0	0	0	0	0	0	0
A0A669BMI7	Inhibitor of Bruton agammaglobulinemia tyrosine kinase		Oreochromis niloticus (Nile tilapia) (Tilapia nilotica)				GEGLHCEDLSEVR	0.9615	-1.4934	0	0	0	0	0	0	0	0	0	0	0	0	0	0	0	0	0	0	0	0	0	0	0	0	0	0	0	0	0	0	0	0	0	0	0	0	0	0	0	0
A0A669BMM6	FRAS1-related extracellular matrix protein 2	LOC100696095	Oreochromis niloticus (Nile tilapia) (Tilapia nilotica)	cell adhesion [GO:0007155]; cell communication [GO:0007154]	membrane [GO:0016020]		LVLGNPK	0.99713	-2.2369	0	0	0	0	0	0	0	0	0	0	10.8217	0	0	0	0	0	0	0	0	0	0	0	0	0	0	0	0	0	0	0	0	0	0	0	0	0	0	0	0	0
A0A669BMN4	SCAN box domain-containing protein		Oreochromis niloticus (Nile tilapia) (Tilapia nilotica)	proteolysis [GO:0006508]		aspartic-type endopeptidase activity [GO:0004190]; nucleic acid binding [GO:0003676]; RNA-directed DNA polymerase activity [GO:0003964]	ALQHQFR	0.99206	-1.5073	0	0	0	13.6929	0	0	0	0	0	0	0	0	0	0	0	0	0	0	0	0	0	0	0	0	0	0	0	0	0	0	0	0	0	0	0	0	0	0	0	0
A0A669BMQ2	H-2 class II histocompatibility antigen, E-S beta chain	LOC100708205	Oreochromis niloticus (Nile tilapia) (Tilapia nilotica)	antigen processing and presentation [GO:0019882]; immune response [GO:0006955]	MHC class II protein complex [GO:0042613]		AILTKSVQPSVRIK	0.93095	-1.0448	0	0	0	0	0	0	0	0	0	0	0	0	0	0	11.009	0	0	0	0	0	0	0	0	0	0	0	0	0	0	0	0	0	0	0	0	0	0	0	0	0
A0A669BMT7	RNA helicase (EC 3.6.4.13)	ifih1	Oreochromis niloticus (Nile tilapia) (Tilapia nilotica)	innate immune response [GO:0045087]	cytoplasm [GO:0005737]	ATP binding [GO:0005524]; DNA binding [GO:0003677]; hydrolase activity [GO:0016787]; metal ion binding [GO:0046872]; RNA binding [GO:0003723]; RNA helicase activity [GO:0003724]	GLLTIDER	0.99642	-2.6038	0	0	0	0	0	0	0	0	0	0	0	0	0	0	0	0	0	0	0	0	0	0	0	0	0	8.70494	0	0	0	0	0	0	0	0	0	0	0	0	0	0
A0A669BMW4	Gamma-aminobutyric acid type A receptor beta2 subunit	gabrb2	Oreochromis niloticus (Nile tilapia) (Tilapia nilotica)	cell-cell signaling [GO:0007267]	chloride channel complex [GO:0034707]; postsynaptic membrane [GO:0045211]	chloride channel activity [GO:0005254]; extracellular ligand-gated ion channel activity [GO:0005230]; GABA-A receptor activity [GO:0004890]	NKMTPDDNILFSTLEMK	0.51538	-0.48874	0	0	0	9.255	8.70425	0	0	0	0	0	0	0	0	0	0	0	0	0	0	0	0	0	0	0	0	0	0	0	0	0	0	0	0	0	0	0	0	0	0	0
A0A669BMZ7	60S ribosomal protein L7a	RPL7A	Oreochromis niloticus (Nile tilapia) (Tilapia nilotica)	ribosome biogenesis [GO:0042254]	cytosolic large ribosomal subunit [GO:0022625]	RNA binding [GO:0003723]	QTATQLFK	0.94855	-1.1552	0	0	0	0	0	0	8.45348	0	8.00826	0	0	0	0	0	0	0	0	0	0	0	0	0	0	0	0	0	0	0	0	0	0	0	0	0	0	0	0	0	0	0
A0A669BN18	Fibrillar collagen NC1 domain-containing protein	col1a2	Oreochromis niloticus (Nile tilapia) (Tilapia nilotica)			extracellular matrix structural constituent [GO:0005201]	GEGGSFGPAGPAGPR	0.99435	-3.0259	0	0	0	0	14.8068	0	0	0	0	0	0	0	11.6369	0	0	0	12.1195	0	10.7469	0	0	0	0	0	0	0	0	0	0	0	0	0	0	0	0	12.6589	12.7476	0	0	0
A0A669BN26	THO complex subunit 2		Oreochromis niloticus (Nile tilapia) (Tilapia nilotica)	mRNA export from nucleus [GO:0006406]; mRNA processing [GO:0006397]	THO complex [GO:0000347]		ANSAAAKENK	0.99355	-2.9995	0	0	0	0	0	0	0	0	0	0	0	0	0	0	0	0	0	0	0	0	0	0	0	0	0	0	0	0	0	0	0	0	0	0	0	0	0	0	0	0
A0A669BN33	Uncharacterized LOC102079322	LOC102079322	Oreochromis niloticus (Nile tilapia) (Tilapia nilotica)				IMLTTTLFIEK	0.95431	-1.4449	0	0	0	0	0	0	0	0	0	0	0	0	0	0	0	0	0	0	0	0	0	0	0	0	0	0	0	0	0	0	0	0	0	0	0	0	0	9.43377	0	0
A0A669BN79	IKAROS family zinc finger 2	ikzf2	Oreochromis niloticus (Nile tilapia) (Tilapia nilotica)				GSPAVVFSGER	0.2	-0.33417	0	0	0	0	0	0	0	0	0	0	0	0	0	0	0	0	0	0	0	0	0	0	0	0	0	0	0	0	0	0	0	0	0	0	0	0	0	0	0	0
A0A669BN92	DNA-binding protein SATB (Special AT-rich sequence-binding protein)	satb2	Oreochromis niloticus (Nile tilapia) (Tilapia nilotica)	chromatin remodeling [GO:0006338]	nucleus [GO:0005634]	DNA binding [GO:0003677]	LSQKVWER	0.97158	-1.5186	0	0	0	0	0	0	0	0	0	0	0	0	13.7955	0	0	0	0	0	0	0	0	0	0	0	0	0	0	0	0	11.0832	0	0	0	0	0	0	0	0	0	0
A0A669BNA4	Transcription cofactor vestigial-like protein 2	LOC100706150	Oreochromis niloticus (Nile tilapia) (Tilapia nilotica)	regulation of DNA-templated transcription [GO:0006355]	nucleus [GO:0005634]		GKELYWF	0.99312	-3.3913	0	0	0	0	0	0	0	0	0	11.246	0	0	0	0	0	0	0	0	0	0	0	0	0	0	0	0	0	0	0	0	0	0	0	0	0	0	0	0	0	0
A0A669BNE4	Zgc:103508	C17orf49	Oreochromis niloticus (Nile tilapia) (Tilapia nilotica)				VPISSESPK	0.95468	-1.4619	0	0	0	0	13.556	0	0	0	0	0	0	0	0	0	0	0	0	0	0	0	0	0	0	0	0	0	0	0	0	0	0	0	0	0	0	0	0	0	0	0
A0A669BNI2	Derlin	derl2	Oreochromis niloticus (Nile tilapia) (Tilapia nilotica)	proteasomal protein catabolic process [GO:0010498]; response to stress [GO:0006950]	endoplasmic reticulum membrane [GO:0005789]		YCRMLEEGSFR	0.94963	-1.4158	0	0	0	0	0	0	0	0	0	0	0	0	0	0	0	0	0	0	0	0	0	9.61616	0	0	0	0	0	0	0	0	0	0	0	0	0	0	0	0	0	0
A0A669BNL4	Fibronectin type III domain containing 3A	fndc3a	Oreochromis niloticus (Nile tilapia) (Tilapia nilotica)		membrane [GO:0016020]		MQPSLKWR	0.97777	-1.587	0	0	0	0	0	0	0	0	0	0	0	0	0	0	0	0	0	0	0	0	0	0	0	0	0	0	0	0	0	0	0	0	0	0	0	0	0	0	0	0
A0A669BNN4	GTPase IMAP family member 4-like	LOC100695714	Oreochromis niloticus (Nile tilapia) (Tilapia nilotica)			GTP binding [GO:0005525]	AEEFNDFK	0.95306	-1.4225	0	9.75921	0	0	0	0	9.82016	0	0	0	0	0	0	0	0	0	0	0	0	0	0	0	0	0	0	0	0	0	0	0	0	0	0	0	0	0	0	0	0	0
A0A669BNR7	Regulator of G protein signaling 11	rgs11	Oreochromis niloticus (Nile tilapia) (Tilapia nilotica)	G protein-coupled receptor signaling pathway [GO:0007186]; intracellular signal transduction [GO:0035556]; negative regulation of signal transduction [GO:0009968]; regulation of G protein-coupled receptor signaling pathway [GO:0008277]			EQMACFRKMEK	0.95019	-0.83378	0	0	0	0	0	0	0	0	0	0	0	0	0	0	0	0	0	0	0	0	0	0	0	0	0	0	0	0	0	0	0	0	0	0	0	0	0	0	0	0
A0A669BNR9	[tau protein] kinase (EC 2.7.11.26)		Oreochromis niloticus (Nile tilapia) (Tilapia nilotica)	protein phosphorylation [GO:0006468]	cytoplasm [GO:0005737]	ATP binding [GO:0005524]; protein serine/threonine kinase activity [GO:0004674]; tau-protein kinase activity [GO:0050321]	FLGDSGK	0.99182	-1.5073	0	0	0	0	0	0	0	0	0	0	0	0	0	0	0	0	0	12.1948	0	0	0	0	0	0	0	0	0	0	0	0	0	0	0	0	0	0	0	0	0	0
A0A669BNT5	Centrosomal protein 295	cep295	Oreochromis niloticus (Nile tilapia) (Tilapia nilotica)				IQQVREQHR	0.98177	-1.6512	0	0	0	0	0	0	0	0	0	0	0	0	0	0	0	0	0	0	0	0	0	0	0	0	0	0	0	0	0	0	0	0	0	0	8.62549	0	0	0	0	0
A0A669BP07	P-type domain-containing protein		Oreochromis niloticus (Nile tilapia) (Tilapia nilotica)	carbohydrate metabolic process [GO:0005975]	membrane [GO:0016020]	alpha-glucosidase activity [GO:0090599]; carbohydrate binding [GO:0030246]	TQGLNIQGSNAGMRNR	0.92463	-0.5807	9.62501	9.36698	0	0	0	0	9.74816	0	0	0	0	0	0	0	0	0	0	0	0	0	0	0	0	0	0	0	0	0	0	0	0	0	0	0	0	0	0	0	0	0
A0A669BPH6	Myc box-dependent-interacting protein 1	LOC100707182	Oreochromis niloticus (Nile tilapia) (Tilapia nilotica)		cytoplasm [GO:0005737]; intracellular organelle [GO:0043229]		DGGMMETSR	0.97477	-1.5371	0	0	0	0	0	0	0	0	0	0	0	0	0	0	0	0	0	0	0	0	0	0	0	0	0	0	0	0	0	0	0	0	0	9.37508	0	0	0	0	0	0
A0A669BPI2	Transposase_22 domain-containing protein		Oreochromis niloticus (Nile tilapia) (Tilapia nilotica)				RAAFTPVRNLLR	0.81644	-0.52749	0	0	0	0	0	0	0	0	0	0	0	0	0	0	0	0	0	0	0	0	0	0	0	0	0	0	0	0	0	0	0	0	0	0	0	0	0	0	0	0
A0A669BPK4	non-specific serine/threonine protein kinase (EC 2.7.11.1)	cdc42bpa	Oreochromis niloticus (Nile tilapia) (Tilapia nilotica)	cell development [GO:0048468]; protein phosphorylation [GO:0006468]	cytoplasm [GO:0005737]	ATP binding [GO:0005524]; metal ion binding [GO:0046872]; protein serine/threonine kinase activity [GO:0004674]	DEIIRVGDNK	0.99105	-2.0959	0	0	0	8.49398	0	0	0	0	0	0	0	0	0	0	0	0	0	0	0	0	0	0	0	0	0	0	0	0	0	0	0	0	0	0	0	0	0	0	0	0
A0A669BPL2	Myelin basic protein		Oreochromis niloticus (Nile tilapia) (Tilapia nilotica)		myelin sheath [GO:0043209]	structural constituent of myelin sheath [GO:0019911]	EPHTDGK	0.99378	-1.5073	0	0	0	11.8494	0	0	0	10.6951	0	0	0	0	0	0	0	0	0	0	0	0	0	0	0	0	0	0	0	0	0	0	0	0	0	0	0	0	0	0	0	0
A0A669BPM0	Nipped-B protein	LOC100699860	Oreochromis niloticus (Nile tilapia) (Tilapia nilotica)	embryo development [GO:0009790]; mitotic cohesin loading [GO:0061780]; regulation of gene expression [GO:0010468]	nucleus [GO:0005634]	chromatin binding [GO:0003682]	DKERNIEK	0.99638	-3.9944	0	0	0	0	0	0	0	0	0	0	0	0	0	0	0	0	0	0	0	0	0	0	0	0	0	0	9.61408	0	0	0	0	0	0	0	0	0	0	0	0	0
A0A669BPS8	Supervillin	SVIL	Oreochromis niloticus (Nile tilapia) (Tilapia nilotica)	cytoskeleton organization [GO:0007010]		actin filament binding [GO:0051015]	TARRASLPSTR	0.94535	-0.84991	0	0	0	0	0	0	0	0	0	0	0	0	0	0	0	0	0	0	0	0	0	0	0	0	0	0	0	0	0	0	0	0	0	0	0	0	0	0	10.8327	0
A0A669BPW0	Tropomyosin beta chain	LOC100710292	Oreochromis niloticus (Nile tilapia) (Tilapia nilotica)		cytoskeleton [GO:0005856]	actin binding [GO:0003779]	LATALQK	0	0.70577	0	0	0	0	0	0	0	0	0	0	0	0	0	0	0	0	0	0	0	0	0	0	0	0	0	0	0	0	0	0	0	0	0	0	0	0	0	0	0	0
A0A669BPW5	Acyl-CoA synthetase family member 2, mitochondrial	LOC100698949	Oreochromis niloticus (Nile tilapia) (Tilapia nilotica)	lipid metabolic process [GO:0006629]			AKTDECITK	0.95199	-1.344	0	0	0	0	0	0	0	0	0	0	0	0	0	0	0	0	0	0	0	0	0	0	0	0	0	0	0	0	0	0	0	0	0	0	0	0	0	0	0	0
A0A669BPX5	ribonuclease H (EC 3.1.26.4)		Oreochromis niloticus (Nile tilapia) (Tilapia nilotica)	DNA integration [GO:0015074]		nucleic acid binding [GO:0003676]	AAEKSKR	0.99769	-2.4657	0	0	0	0	0	0	0	0	0	0	0	0	0	0	0	0	0	0	0	0	0	0	0	0	0	0	11.4524	0	0	0	0	0	0	0	0	0	0	0	0	0
A0A669BQ12	Arginine and glutamate rich 1	arglu1	Oreochromis niloticus (Nile tilapia) (Tilapia nilotica)				HSKSSKHSK	0.93088	-1.0109	0	0	0	0	9.61058	0	0	0	0	0	0	0	0	0	0	0	0	0	0	0	0	0	0	0	0	0	0	0	0	0	0	0	0	0	0	0	0	0	0	0
A0A669BQ82	Adhesion G protein-coupled receptor L3	ADGRL3	Oreochromis niloticus (Nile tilapia) (Tilapia nilotica)	cell surface receptor signaling pathway [GO:0007166]	plasma membrane [GO:0005886]	carbohydrate binding [GO:0030246]; G protein-coupled receptor activity [GO:0004930]	FSPVRRQR	0.93498	-0.94817	0	0	0	0	0	0	0	0	0	0	0	0	0	0	0	0	0	0	0	0	0	0	0	0	0	0	0	0	0	0	0	0	0	0	0	0	9.61705	0	0	0
A0A669BQA2	SFI1 centrin binding protein	sfi1	Oreochromis niloticus (Nile tilapia) (Tilapia nilotica)				ELRIRHLAR	0.99779	-2.1903	0	0	10.1888	0	0	0	0	0	0	0	0	0	0	0	0	0	0	0	0	0	0	0	0	0	0	0	0	0	0	0	0	0	0	9.24534	0	0	0	0	0	0
A0A669BQC6	Calcium-transporting ATPase (EC 7.2.2.10)	LOC100710397	Oreochromis niloticus (Nile tilapia) (Tilapia nilotica)		sarcoplasmic reticulum membrane [GO:0033017]	ATP binding [GO:0005524]; ATP hydrolysis activity [GO:0016887]; P-type calcium transporter activity [GO:0005388]	LTSIKSTTLR	0.99502	-2.7327	0	0	0	0	0	0	0	0	0	0	0	0	0	0	0	0	0	0	0	0	0	0	0	0	0	0	0	0	0	0	0	0	0	0	0	0	11.1031	0	10.9965	0
A0A669BQG4	Reverse transcriptase		Oreochromis niloticus (Nile tilapia) (Tilapia nilotica)	DNA integration [GO:0015074]		metal ion binding [GO:0046872]; nucleic acid binding [GO:0003676]	SAKTVAEK	0.99272	-3.1692	0	0	0	0	0	0	0	0	0	0	0	0	0	0	9.75425	0	0	0	0	0	0	0	0	0	0	0	0	0	0	0	0	0	0	0	0	0	0	0	0	0
A0A669BQK1	ADP ribosylation factor like GTPase 4C	arl4c	Oreochromis niloticus (Nile tilapia) (Tilapia nilotica)			GTP binding [GO:0005525]; GTPase activity [GO:0003924]	LYEMILKRR	0.9355	-0.98236	0	0	0	0	0	0	0	0	0	0	0	0	0	0	0	0	0	0	0	0	0	0	0	0	0	0	0	0	0	0	0	0	0	0	0	0	10.2015	0	0	0
A0A669BQK3	Solute carrier family 4 member 1b (Diego blood group)		Oreochromis niloticus (Nile tilapia) (Tilapia nilotica)		membrane [GO:0016020]	solute:inorganic anion antiporter activity [GO:0005452]	KPTAVFVR	0.98704	-1.7488	0	0	0	0	9.67606	0	0	0	0	0	0	0	0	0	0	0	0	0	0	0	0	0	0	0	0	0	0	0	0	0	0	0	0	0	0	0	0	0	0	0
A0A669BQQ3	VGF nerve growth factor inducible		Oreochromis niloticus (Nile tilapia) (Tilapia nilotica)			neuropeptide hormone activity [GO:0005184]	NEDSYRRLR	0.9947	-2.7341	0	0	0	0	0	0	0	0	0	0	0	0	0	0	0	0	0	0	0	0	0	0	0	0	0	0	0	0	0	0	0	0	0	0	0	0	0	0	0	0
A0A669BQU1	Cyclin-dependent kinase 8		Oreochromis niloticus (Nile tilapia) (Tilapia nilotica)	protein phosphorylation [GO:0006468]	cytoplasm [GO:0005737]	ATP binding [GO:0005524]; protein serine/threonine kinase activity [GO:0004674]	ANKKPLQLPR	0.99436	-3.0543	0	0	0	0	0	0	0	0	0	0	0	0	0	0	0	0	0	0	0	0	0	0	0	0	0	0	0	0	0	0	0	0	0	0	0	0	0	0	0	0
A0A669BQU7	Pyruvate carboxylase (EC 6.4.1.1)	PC	Oreochromis niloticus (Nile tilapia) (Tilapia nilotica)	gluconeogenesis [GO:0006094]; lipid metabolic process [GO:0006629]; pyruvate metabolic process [GO:0006090]	cytoplasm [GO:0005737]	ATP binding [GO:0005524]; metal ion binding [GO:0046872]; pyruvate carboxylase activity [GO:0004736]	LFLDGPK	0.99626	-1.5073	0	0	0	0	0	0	0	0	0	0	0	0	0	0	0	0	0	0	0	0	0	0	0	0	0	0	0	0	0	0	0	11.8151	0	0	0	0	0	0	0	0
A0A669BR43	Selenoprotein O	selenoo	Oreochromis niloticus (Nile tilapia) (Tilapia nilotica)			ATP binding [GO:0005524]; metal ion binding [GO:0046872]; nucleotidyltransferase activity [GO:0016779]	EVVLRTAR	0.99104	-2.0877	0	11.3591	11.2393	0	0	0	0	11.7446	0	0	0	12.5626	0	0	0	0	0	0	0	0	0	0	0	0	10.2869	0	0	0	0	0	0	13.52	0	0	0	0	12.6423	12.6488	0	0
A0A669BR65	Nucleolar GTP-binding protein 2	gnl2	Oreochromis niloticus (Nile tilapia) (Tilapia nilotica)		nucleolus [GO:0005730]	GTP binding [GO:0005525]	KDPYRVVMR	0.93219	-1.0076	0	0	0	0	9.64841	0	0	0	0	9.08375	0	0	0	0	0	0	0	0	0	0	0	0	0	0	0	0	0	0	0	0	0	0	0	0	0	0	0	0	0	0
A0A669BRE3	WD repeat domain 36	wdr36	Oreochromis niloticus (Nile tilapia) (Tilapia nilotica)	rRNA processing [GO:0006364]	small-subunit processome [GO:0032040]		KLEEEMK	0.99363	-3.1455	0	0	0	8.53609	0	0	0	0	0	0	0	0	0	0	0	0	0	0	0	0	0	0	0	0	0	0	0	0	0	0	0	0	0	0	0	0	0	11.143	0	0
A0A669BRF5	EFR3 homolog A	efr3a	Oreochromis niloticus (Nile tilapia) (Tilapia nilotica)				KAIDTTGLEEQER	0.99489	-2.8067	0	0	0	0	10.4776	0	0	0	0	0	0	0	0	0	0	0	0	0	0	0	0	0	0	0	0	0	0	0	0	0	0	0	0	0	0	0	0	0	0	0
A0A669BRH0	Cyclin-dependent kinase 11B	LOC100697195	Oreochromis niloticus (Nile tilapia) (Tilapia nilotica)	protein phosphorylation [GO:0006468]	cytoplasm [GO:0005737]	ATP binding [GO:0005524]; protein serine/threonine kinase activity [GO:0004674]	SLMETMKQPFLPGEVK	0.99448	-3.3415	0	0	0	0	0	0	9.30668	9.14167	0	0	0	0	0	0	0	0	0	0	0	0	0	0	0	0	0	0	0	0	0	0	0	13.1732	0	0	0	0	0	0	0	0
A0A669BRH7	Melanin-concentrating hormone receptor 1 (G-protein coupled receptor 24) (MCH-1R)	LOC100695139	Oreochromis niloticus (Nile tilapia) (Tilapia nilotica)	neuropeptide signaling pathway [GO:0007218]	plasma membrane [GO:0005886]	melanin-concentrating hormone receptor activity [GO:0030273]	AVRPAHRKFR	0.9368	-0.98018	0	0	0	0	0	0	0	0	0	0	0	0	0	0	0	0	0	0	0	0	0	0	0	0	0	0	0	0	0	0	0	0	10.5062	0	0	0	0	0	0	0
A0A669BRK5	Tc1-like transposase DDE domain-containing protein		Oreochromis niloticus (Nile tilapia) (Tilapia nilotica)			nucleic acid binding [GO:0003676]	LNSQCYCQFLEDTFFK	0.92985	-1.0672	0	0	0	0	0	0	0	0	0	0	0	0	0	0	0	0	0	0	0	0	0	0	0	0	0	0	0	0	0	0	0	0	0	0	0	0	0	0	0	0
A0A669BRL4	Inositol polyphosphate-5-phosphatase E	inpp5e	Oreochromis niloticus (Nile tilapia) (Tilapia nilotica)	phosphatidylinositol dephosphorylation [GO:0046856]	membrane [GO:0016020]	inositol-polyphosphate 5-phosphatase activity [GO:0004445]	SFASATLRAANRIDR	0.99333	-3.1487	0	0	0	0	0	9.12792	0	0	0	0	0	0	0	0	0	0	0	0	0	0	0	0	0	0	0	0	0	0	0	0	0	0	0	0	0	0	0	0	0	0
A0A669BRQ0	Profilin	PFN2	Oreochromis niloticus (Nile tilapia) (Tilapia nilotica)	actin cytoskeleton organization [GO:0030036]		actin binding [GO:0003779]	SQGGEPTYNISVGR	0.042857	-0.24319	0	0	0	0	0	0	8.90075	8.71648	8.7138	0	0	0	0	0	0	0	0	0	0	0	0	0	0	0	0	0	0	0	0	0	0	0	0	0	0	0	0	0	0	0
A0A669BRQ8	DEAH-box helicase 15	DHX15	Oreochromis niloticus (Nile tilapia) (Tilapia nilotica)				FAHIDGDHLTLLNVYHAFK	0.31959	-0.37098	0	0	0	0	0	0	0	0	0	0	0	0	0	0	0	0	0	0	0	0	0	0	0	0	0	0	0	10.6988	0	10.5692	0	0	0	0	0	0	0	0	0	0
A0A669BRR7	IlvB (bacterial acetolactate synthase)-like		Oreochromis niloticus (Nile tilapia) (Tilapia nilotica)	fatty acid metabolic process [GO:0006631]	membrane [GO:0016020]	catalytic activity [GO:0003824]; magnesium ion binding [GO:0000287]; thiamine pyrophosphate binding [GO:0030976]	GPLCWLDPGR	0.94805	-1.1647	8.91409	0	0	8.57728	0	0	0	0	0	0	0	0	0	0	0	0	0	0	0	0	0	0	0	0	0	0	0	0	0	0	0	0	8.52235	0	0	0	0	0	0	0
A0A669BRU4	Ig-like domain-containing protein		Oreochromis niloticus (Nile tilapia) (Tilapia nilotica)				NPENHTFHT	0.9714	-1.5309	0	0	0	0	0	0	0	0	0	0	0	0	0	0	0	0	0	0	0	0	0	0	0	0	0	0	0	0	0	0	0	0	0	0	0	0	0	0	0	0
A0A669BRY6	GREB1 like retinoic acid receptor coactivator	greb1l	Oreochromis niloticus (Nile tilapia) (Tilapia nilotica)		membrane [GO:0016020]		VVVPEPK	1.0033	-1.5073	0	0	12.2987	14.5558	0	14.2734	12.6304	0	0	0	0	0	0	11.9628	0	0	0	0	0	0	11.2201	11.8876	0	11.8542	0	0	11.5841	0	0	0	0	0	13.3127	0	12.7249	0	12.7107	0	0	0
A0A669BS39	C2H2-type domain-containing protein		Oreochromis niloticus (Nile tilapia) (Tilapia nilotica)				KSHTVRK	0.93426	-0.98403	0	0	0	0	0	0	0	0	0	0	0	0	11.0019	0	0	0	0	0	0	0	0	0	0	0	0	0	0	0	0	0	0	0	0	0	0	0	0	0	0	0
A0A669BSA8	Endothelial cell adhesion molecule	esam	Oreochromis niloticus (Nile tilapia) (Tilapia nilotica)	cell-cell adhesion [GO:0098609]	membrane [GO:0016020]		VPPSVPK	0.99725	-1.5073	0	0	12.0746	0	14.3485	14.162	12.5992	12.6138	12.5863	0	0	0	0	0	0	12.6073	0	0	0	0	0	0	0	0	0	0	0	0	0	0	0	0	13.1397	12.4848	0	12.4684	12.536	12.3858	0	0
A0A669BSA9	ribonuclease H (EC 3.1.26.4)		Oreochromis niloticus (Nile tilapia) (Tilapia nilotica)	DNA integration [GO:0015074]		metal ion binding [GO:0046872]; nucleic acid binding [GO:0003676]; RNA-DNA hybrid ribonuclease activity [GO:0004523]	AVWLKVIKR	0.99394	-3.6675	0	0	0	0	0	0	0	0	0	0	0	0	0	0	0	0	0	0	0	0	0	0	0	0	0	0	0	0	0	0	0	0	0	0	0	0	0	0	0	0
A0A669BSE5	Mucin 5.3		Oreochromis niloticus (Nile tilapia) (Tilapia nilotica)				DPCAYNRYR	0.97411	-1.5376	0	0	0	9.41863	0	0	0	0	0	0	0	0	0	0	0	0	0	0	0	0	0	0	0	0	0	0	0	0	0	0	0	0	0	0	0	0	0	0	0	0
A0A669BSL7	LanC like 2	lancl2	Oreochromis niloticus (Nile tilapia) (Tilapia nilotica)	carbohydrate metabolic process [GO:0005975]; peptide modification [GO:0031179]			ALDYVKR	0.9949	-2.8441	0	0	0	10.0023	0	0	0	0	0	0	0	0	0	0	0	0	0	0	0	0	0	0	0	0	0	0	0	0	0	0	0	0	0	0	0	0	0	0	9.71706	0
A0A669BSN1	Protein phosphatase 6, regulatory subunit 3		Oreochromis niloticus (Nile tilapia) (Tilapia nilotica)	regulation of phosphoprotein phosphatase activity [GO:0043666]		protein phosphatase binding [GO:0019903]	ATFTSYKLEK	0.98416	-1.62	0	0	0	0	8.97963	0	0	0	0	0	0	0	0	0	0	0	0	0	0	0	0	0	0	0	0	0	0	0	0	0	0	0	0	0	0	0	0	0	0	0
A0A669BSQ5	Transmembrane protein 120A	TMEM120A	Oreochromis niloticus (Nile tilapia) (Tilapia nilotica)		nuclear inner membrane [GO:0005637]		TPILDEMKEKIK	0.90891	-0.67683	0	0	0	0	0	0	0	0	0	0	0	0	0	0	0	0	0	0	0	0	0	0	0	0	0	0	0	0	0	0	0	0	0	0	0	0	0	0	0	0
A0A669BSR7	polynucleotide adenylyltransferase (EC 2.7.7.19)	LOC100704180	Oreochromis niloticus (Nile tilapia) (Tilapia nilotica)	mRNA processing [GO:0006397]; RNA 3'-end processing [GO:0031123]; RNA polyadenylation [GO:0043631]	nucleus [GO:0005634]	ATP binding [GO:0005524]; polynucleotide adenylyltransferase activity [GO:0004652]; RNA binding [GO:0003723]	MPSGQQPQK	0.97424	-1.5341	0	0	0	8.27654	0	0	0	0	0	0	0	0	0	0	0	0	0	0	0	0	0	0	0	0	0	0	0	0	0	0	0	0	0	0	0	0	0	0	0	0
A0A669BSR9	Cathepsin L1	LOC100711989	Oreochromis niloticus (Nile tilapia) (Tilapia nilotica)	proteolysis [GO:0006508]		cysteine-type peptidase activity [GO:0008234]	DYRFIPR	0.98284	-1.6243	0	0	0	0	0	0	0	0	0	0	0	0	0	0	0	0	0	0	0	0	0	0	0	0	0	0	0	0	0	0	0	0	0	0	0	0	0	0	0	0
A0A669BST6	DUF4371 domain-containing protein		Oreochromis niloticus (Nile tilapia) (Tilapia nilotica)			protein dimerization activity [GO:0046983]	SLQRRLFR	0.93298	-0.95001	0	0	0	0	0	0	0	0	0	0	0	0	0	0	0	9.22547	0	0	0	0	0	0	0	0	0	0	0	0	0	0	0	0	0	0	10.7581	0	0	0	0	0
A0A669BSV6	Timeless circadian regulator	timeless	Oreochromis niloticus (Nile tilapia) (Tilapia nilotica)		nucleus [GO:0005634]		GMYGGVKVR	0.98788	-1.6943	0	0	0	0	0	0	0	0	0	0	0	0	0	0	0	0	0	0	0	0	0	0	0	0	0	0	0	0	0	0	0	0	0	0	0	0	0	0	0	0
A0A669BSX2	C-terminal binding protein 1	ctbp1	Oreochromis niloticus (Nile tilapia) (Tilapia nilotica)		nucleus [GO:0005634]	NAD binding [GO:0051287]; oxidoreductase activity, acting on the CH-OH group of donors, NAD or NADP as acceptor [GO:0016616]; transcription corepressor activity [GO:0003714]	QNMLHNKQLR	0.98335	-1.6205	0	0	0	0	0	0	0	0	0	8.84937	0	0	0	0	0	0	0	0	0	0	0	0	0	0	0	0	0	0	0	0	0	0	0	0	0	0	0	0	0	0
A0A669BSX3	non-specific protein-tyrosine kinase (EC 2.7.10.2)	PTK2B	Oreochromis niloticus (Nile tilapia) (Tilapia nilotica)	positive regulation of cell population proliferation [GO:0008284]; regulation of cellular component organization [GO:0051128]; signal complex assembly [GO:0007172]	cell projection [GO:0042995]; cytoskeleton [GO:0005856]; focal adhesion [GO:0005925]	ATP binding [GO:0005524]; non-membrane spanning protein tyrosine kinase activity [GO:0004715]	NLLDAVDQARVR	0.98428	-1.5897	0	0	0	0	0	0	0	0	0	0	0	0	0	0	0	0	0	0	0	0	0	0	0	0	0	0	0	0	0	0	0	0	0	0	0	0	8.96249	0	0	0
A0A669BT07	40S ribosomal protein S9	rps9	Oreochromis niloticus (Nile tilapia) (Tilapia nilotica)	translation [GO:0006412]	small ribosomal subunit [GO:0015935]	rRNA binding [GO:0019843]; structural constituent of ribosome [GO:0003735]	KTYVTPR	0.98476	-1.6183	10.9371	0	0	0	0	0	0	0	0	0	0	0	0	0	0	0	0	0	0	0	0	0	0	0	0	0	0	0	0	0	0	0	0	0	0	0	0	0	0	0
A0A669BT11	Janus kinase and microtubule-interacting protein 2	LOC100711386	Oreochromis niloticus (Nile tilapia) (Tilapia nilotica)			kinase binding [GO:0019900]; microtubule binding [GO:0008017]	QIKDLEEK	0.97799	-1.587	0	0	0	0	0	0	0	0	0	0	0	0	0	0	0	0	0	0	0	0	0	0	0	0	0	0	0	0	0	0	0	0	0	0	0	0	0	0	0	0
A0A669BT19	AP-1 complex subunit mu-1	ap1m1	Oreochromis niloticus (Nile tilapia) (Tilapia nilotica)	intracellular protein transport [GO:0006886]; vesicle-mediated transport [GO:0016192]	clathrin adaptor complex [GO:0030131]; clathrin-coated vesicle membrane [GO:0030665]; Golgi apparatus [GO:0005794]		SEIVGSIKMR	0.98307	-1.6437	0	0	0	0	0	0	0	0	0	0	0	0	0	0	0	0	0	0	0	0	0	0	0	0	0	0	0	0	0	0	0	0	0	0	0	0	0	0	0	0
A0A669BT29	Si:ch211-66i15.4		Oreochromis niloticus (Nile tilapia) (Tilapia nilotica)				KSLRLASEK	0.93973	-0.93152	0	0	0	0	0	0	0	0	0	0	0	0	0	0	0	0	0	0	0	0	0	0	0	0	0	0	0	0	0	0	0	0	0	0	0	0	0	0	0	0
A0A669BT66	Glutathione peroxidase		Oreochromis niloticus (Nile tilapia) (Tilapia nilotica)	response to oxidative stress [GO:0006979]		glutathione peroxidase activity [GO:0004602]	LHAKYAER	0.98059	-1.5887	0	0	0	0	0	0	0	0	0	0	0	0	0	0	0	0	0	0	0	0	0	0	0	0	0	0	0	0	0	0	0	0	0	0	0	0	0	0	0	0
A0A669BT72	Islet cell autoantigen 1	ica1	Oreochromis niloticus (Nile tilapia) (Tilapia nilotica)		cytoplasm [GO:0005737]; endomembrane system [GO:0012505]; intracellular membrane-bounded organelle [GO:0043231]	protein domain specific binding [GO:0019904]	QMEKFRK	0.93198	-0.98403	0	0	0	0	0	0	0	0	0	11.8726	0	0	0	0	0	0	0	0	0	0	0	0	0	0	0	0	0	0	0	0	0	0	0	0	0	0	0	0	0	0
A0A669BT74	Protein Wiz	LOC100695065	Oreochromis niloticus (Nile tilapia) (Tilapia nilotica)				MGDLYIKKSHK	0.99549	-2.7187	0	0	0	0	0	0	0	0	0	0	0	0	0	0	0	0	0	0	0	0	0	0	0	0	0	0	0	0	0	0	0	0	0	0	0	0	0	0	0	0
A0A669BTA6	Transmembrane protein 150B	tmem150b	Oreochromis niloticus (Nile tilapia) (Tilapia nilotica)		membrane [GO:0016020]		WWVGPVR	0.99626	-1.5073	0	0	11.3086	0	0	0	11.7149	11.567	0	0	0	0	0	0	0	0	0	0	0	0	0	0	0	0	0	0	0	0	0	0	0	0	0	0	0	0	0	0	11.4887	0
A0A669BTB5	40S ribosomal protein S20	rps20	Oreochromis niloticus (Nile tilapia) (Tilapia nilotica)	translation [GO:0006412]	small ribosomal subunit [GO:0015935]	RNA binding [GO:0003723]; structural constituent of ribosome [GO:0003735]	ITLTSRNVK	0.9772	-1.5718	0	0	0	0	0	0	0	0	0	0	0	0	0	0	0	0	0	0	0	0	0	0	0	0	0	0	0	0	0	0	0	0	0	0	0	0	0	0	0	9.68296
A0A669BTB8	Trinucleotide repeat containing 18	tnrc18	Oreochromis niloticus (Nile tilapia) (Tilapia nilotica)			chromatin binding [GO:0003682]	LPSVENRPK	0.96038	-1.4768	0	0	0	0	9.51928	0	0	0	0	0	0	0	0	0	0	0	0	0	0	0	0	0	0	0	0	0	0	0	0	0	0	0	0	0	0	0	0	0	10.634	0
A0A669BTF4	MAM and LDL receptor class A domain containing 1	malrd1	Oreochromis niloticus (Nile tilapia) (Tilapia nilotica)		membrane [GO:0016020]		SPVFPPSR	0.99464	-2.9848	0	8.43008	0	0	0	0	0	0	0	0	0	0	0	0	0	0	0	0	0	0	0	0	0	0	0	0	0	0	0	0	0	0	0	0	0	0	0	0	0	0
A0A669BTF8	Membrane associated guanylate kinase, WW and PDZ domain containing 1a		Oreochromis niloticus (Nile tilapia) (Tilapia nilotica)		membrane [GO:0016020]		GTFINTKLKK	0.91292	-0.64815	0	0	0	0	0	0	0	0	0	0	0	0	0	0	0	0	0	0	0	0	0	0	0	0	0	0	0	0	0	0	0	0	0	0	0	0	0	0	0	0
A0A669BTJ0	NAD(+) kinase (EC 2.7.1.23)	LOC100706290	Oreochromis niloticus (Nile tilapia) (Tilapia nilotica)	NAD metabolic process [GO:0019674]; NADP biosynthetic process [GO:0006741]; phosphorylation [GO:0016310]		NAD+ kinase activity [GO:0003951]	MPVIRHTR	0.97839	-1.5867	9.53395	0	0	0	0	0	0	0	9.69596	0	0	0	0	0	0	0	0	0	0	0	0	0	0	0	0	0	0	0	0	0	0	0	0	0	9.83234	0	0	0	0	0
A0A669BTM0	Copine 7	cpne7	Oreochromis niloticus (Nile tilapia) (Tilapia nilotica)			calcium-dependent phospholipid binding [GO:0005544]	TASGPATCVTK	0.98843	-1.8276	0	0	0	0	0	0	0	0	0	0	0	0	0	0	0	0	0	0	0	0	0	0	0	0	0	0	0	0	0	0	0	0	0	0	0	0	0	0	0	0
A0A669BTX2	Piccolo presynaptic cytomatrix protein a		Oreochromis niloticus (Nile tilapia) (Tilapia nilotica)		cell projection [GO:0042995]; membrane [GO:0016020]; organelle [GO:0043226]; presynaptic active zone [GO:0048786]	metal ion binding [GO:0046872]	EHEQLMVQK	0.9985	-2.3387	0	0	0	13.4842	0	0	0	0	0	0	0	0	0	0	0	0	0	0	0	0	0	0	0	0	0	0	0	0	0	0	0	0	0	0	0	0	0	0	0	0
A0A669BTZ6	Purine-rich element-binding protein gamma-like	LOC100706527	Oreochromis niloticus (Nile tilapia) (Tilapia nilotica)		nucleus [GO:0005634]	purine-rich negative regulatory element binding [GO:0032422]; RNA polymerase II transcription regulatory region sequence-specific DNA binding [GO:0000977]	MADGCCK	0.998	-2.3283	0	0	0	0	0	0	0	0	0	0	0	0	0	0	0	0	0	0	0	0	0	0	0	0	0	0	0	0	0	0	0	0	0	0	0	0	0	0	0	0
A0A669BU14	Glutamyl-tRNA(Gln) amidotransferase subunit C, mitochondrial (Glu-AdT subunit C) (EC 6.3.5.-)	gatc GATC	Oreochromis niloticus (Nile tilapia) (Tilapia nilotica)	glutaminyl-tRNAGln biosynthesis via transamidation [GO:0070681]; mitochondrial translation [GO:0032543]; regulation of translational fidelity [GO:0006450]	glutamyl-tRNA(Gln) amidotransferase complex [GO:0030956]; mitochondrion [GO:0005739]	ATP binding [GO:0005524]; glutaminyl-tRNA synthase (glutamine-hydrolyzing) activity [GO:0050567]	LALVDFR	0.99339	-2.9964	0	0	0	0	0	0	0	0	0	0	0	0	0	0	0	0	0	0	0	0	0	0	0	0	0	0	0	0	0	0	0	0	0	0	0	0	0	0	0	0
A0A669BU45	Reverse transcriptase domain-containing protein		Oreochromis niloticus (Nile tilapia) (Tilapia nilotica)			2-oxoglutarate-dependent dioxygenase activity [GO:0016706]; methyltransferase activity [GO:0008168]	HQNSLPGK	0.9563	-1.3896	0	0	0	0	0	0	0	0	0	0	0	0	0	0	0	0	0	0	8.99628	0	0	0	0	10.0945	0	0	0	0	0	0	0	0	0	0	0	0	9.64834	0	0	0
A0A669BUB2	Histone H4		Oreochromis niloticus (Nile tilapia) (Tilapia nilotica)		nucleosome [GO:0000786]; nucleus [GO:0005634]	DNA binding [GO:0003677]; protein heterodimerization activity [GO:0046982]; structural constituent of chromatin [GO:0030527]	DAVTYTEHAK	0	66.588	10.5278	10.016	8.51021	8.90168	8.97083	9.45479	11.5877	10.793	9.43594	9.35614	10.4463	9.45047	9.89392	0	0	10.3151	9.04573	0	0	0	0	0	0	0	0	0	0	0	0	0	0	0	0	0	0	0	0	0	0	0
A0A669BUB5	AAA+ ATPase domain-containing protein		Oreochromis niloticus (Nile tilapia) (Tilapia nilotica)	neurogenesis [GO:0022008]		ATP binding [GO:0005524]; ATP hydrolysis activity [GO:0016887]	RTAWEDPSK	0.98933	-1.7145	0	0	0	0	0	0	0	0	0	0	0	0	0	0	0	0	0	0	0	0	0	0	0	0	0	0	0	0	0	0	0	0	0	0	0	0	0	0	0	0
A0A669BUC7	Noelin-3	LOC100700019	Oreochromis niloticus (Nile tilapia) (Tilapia nilotica)		extracellular region [GO:0005576]; synapse [GO:0045202]		NCMSKLTCGK	0.97812	-1.5855	0	0	0	0	0	0	0	0	0	0	0	0	0	0	0	0	0	0	0	0	0	0	0	0	0	0	0	0	0	0	0	0	0	0	0	0	0	0	0	0
A0A669BUG9	Serpin domain-containing protein		Oreochromis niloticus (Nile tilapia) (Tilapia nilotica)		extracellular space [GO:0005615]	serine-type endopeptidase inhibitor activity [GO:0004867]	ATEATFK	0.99502	-1.5073	0	0	0	0	0	0	0	0	0	0	0	0	0	0	0	0	0	0	0	0	0	0	0	0	0	10.9194	0	0	0	0	0	0	0	0	0	0	0	0	0	0
A0A669BUK4	ArfGAP with RhoGAP domain, ankyrin repeat and PH domain 2	arap2	Oreochromis niloticus (Nile tilapia) (Tilapia nilotica)	signal transduction [GO:0007165]	cytoplasm [GO:0005737]	GTPase activator activity [GO:0005096]	KFVGFRLLGK	0.93281	-1.0101	0	0	0	0	0	0	0	0	0	0	0	0	0	0	0	0	0	12.991	0	0	0	0	0	0	0	0	0	0	0	0	0	0	0	0	0	0	0	0	0	0
A0A669BUL3	Calcitonin related polypeptide beta	calcb	Oreochromis niloticus (Nile tilapia) (Tilapia nilotica)		extracellular region [GO:0005576]	hormone activity [GO:0005179]	VTLTDYEAR	0.95556	-1.3682	0	0	9.36807	0	0	0	0	0	0	0	0	0	0	0	0	0	0	0	0	0	0	0	0	0	0	0	0	0	0	0	0	0	0	0	0	0	0	0	0	0
A0A669BUM7	C2 domain-containing protein		Oreochromis niloticus (Nile tilapia) (Tilapia nilotica)			small GTPase binding [GO:0031267]	MSLIDLDDDQR	0	0.23468	0	0	0	9.98071	0	0	0	0	9.99788	0	0	0	9.1721	9.13224	0	0	0	0	0	0	0	0	0	0	9.02373	9.03796	0	0	0	0	0	0	0	9.06313	0	0	0	0	0	0
A0A669BUS2	Protein tyrosine phosphatase non-receptor type 12	ptpn12	Oreochromis niloticus (Nile tilapia) (Tilapia nilotica)	protein dephosphorylation [GO:0006470]		protein tyrosine phosphatase activity [GO:0004725]	KGVRGNDNK	0.93233	-0.95807	0	0	0	0	0	0	0	0	0	0	0	0	0	0	0	0	0	0	0	0	0	0	0	0	0	0	0	0	0	0	11.3474	0	0	0	0	0	0	0	0	0
A0A669BUW7	Secreted protein		Oreochromis niloticus (Nile tilapia) (Tilapia nilotica)				TLLVTNDER	0.95238	-1.3205	0	0	0	0	0	0	0	0	0	0	0	0	0	0	0	0	0	0	0	0	0	0	0	0	0	0	0	0	0	0	0	0	0	0	0	0	0	0	0	0
A0A669BV63	Centrosomal protein 131	cep131	Oreochromis niloticus (Nile tilapia) (Tilapia nilotica)	intraciliary transport involved in cilium assembly [GO:0035735]	cilium [GO:0005929]		LEVERVTR	0.99348	-3.6445	0	0	0	0	0	0	0	0	0	10.5734	0	11.1475	0	0	0	0	0	0	0	0	0	0	0	0	0	0	0	11.2373	0	11.2348	0	0	0	0	0	0	0	0	0	0
A0A669BV64	Fanconi-associated nuclease (EC 3.1.4.1)	fan1	Oreochromis niloticus (Nile tilapia) (Tilapia nilotica)	interstrand cross-link repair [GO:0036297]	nucleus [GO:0005634]	DNA binding [GO:0003677]; metal ion binding [GO:0046872]; phosphodiesterase I activity [GO:0004528]	GRLSLSRTK	0.98517	-1.6143	0	0	0	11.0813	0	0	0	0	0	0	0	0	0	0	0	0	0	0	0	0	0	0	0	0	0	0	0	0	0	0	0	0	0	0	0	0	0	0	0	0
A0A669BVB8	Transcriptional adapter	tada2b	Oreochromis niloticus (Nile tilapia) (Tilapia nilotica)	regulation of histone acetylation [GO:0035065]; regulation of transcription by RNA polymerase II [GO:0006357]	nucleus [GO:0005634]; SAGA-type complex [GO:0070461]	transcription coactivator activity [GO:0003713]; zinc ion binding [GO:0008270]	MPSYLDKVLK	0.99247	-2.1356	0	0	0	0	0	0	0	0	0	0	0	0	0	0	0	0	0	0	0	0	0	0	0	0	0	0	0	0	0	0	0	0	0	0	0	0	0	0	10.9695	0
A0A669BVJ9	Myosin IXAa	MYO9A	Oreochromis niloticus (Nile tilapia) (Tilapia nilotica)	intracellular signal transduction [GO:0035556]; system development [GO:0048731]	cytoplasm [GO:0005737]; growth cone [GO:0030426]; membrane [GO:0016020]; myosin complex [GO:0016459]; synapse [GO:0045202]	actin binding [GO:0003779]; ATP binding [GO:0005524]; GTPase activator activity [GO:0005096]; microfilament motor activity [GO:0000146]	GSPGLGWNGR	0.974	-1.5333	0	0	0	0	0	0	0	8.3773	0	0	0	0	0	0	0	0	0	0	0	0	0	0	0	0	0	0	0	0	0	0	0	0	0	0	0	0	0	0	0	0
A0A669BVK8	Si:dkey-46i9.6		Oreochromis niloticus (Nile tilapia) (Tilapia nilotica)			zinc ion binding [GO:0008270]	RNAELETVAR	0.98787	-1.6912	0	0	0	8.49398	0	0	0	0	0	0	0	0	0	0	0	0	0	0	0	0	0	0	0	0	0	0	0	0	0	0	0	0	0	0	0	0	0	0	0	0
A0A669BVX4	DUF4817 domain-containing protein		Oreochromis niloticus (Nile tilapia) (Tilapia nilotica)			nucleic acid binding [GO:0003676]	GPVEWPPR	0.95707	-1.4693	0	0	0	0	0	0	0	0	0	0	0	0	0	0	0	0	0	0	0	0	0	0	0	0	0	0	0	0	0	0	0	0	0	0	0	0	0	0	0	0
A0A669BVY5	RUN domain containing 3b		Oreochromis niloticus (Nile tilapia) (Tilapia nilotica)				DFRTSRR	0.93278	-0.98403	0	0	0	0	0	0	0	0	0	0	0	0	0	0	0	0	0	0	0	0	0	0	0	0	0	0	0	0	0	0	0	0	10.594	0	0	0	0	0	0	0
A0A669BW14	Janus kinase and microtubule-interacting protein 2	LOC100711386	Oreochromis niloticus (Nile tilapia) (Tilapia nilotica)			kinase binding [GO:0019900]; microtubule binding [GO:0008017]	AGDGAEHCGSPCK	0.98346	-1.6418	0	0	0	0	0	0	0	0	0	0	0	0	0	0	0	0	0	0	0	0	0	0	0	0	0	0	0	0	0	0	0	0	0	0	0	0	0	0	0	0
A0A669BWB8	Astrotactin 1	astn1	Oreochromis niloticus (Nile tilapia) (Tilapia nilotica)	neuron migration [GO:0001764]	membrane [GO:0016020]		DNGGCSR	0.99403	-1.5073	0	0	0	0	0	0	0	0	0	0	0	0	0	0	0	0	0	0	0	0	0	0	0	0	0	0	0	0	0	0	0	0	0	0	0	0	0	0	0	0
A0A669BWD2	Protein AHNAK2	LOC100691190	Oreochromis niloticus (Nile tilapia) (Tilapia nilotica)				EPSISLKTSGSEHEVK	0.99751	-2.409	0	0	0	0	0	0	0	0	8.87354	0	0	0	0	0	0	0	0	0	0	0	0	0	0	0	0	0	0	0	0	0	0	0	0	0	0	0	0	0	0	0
A0A669BWD6	DLG associated protein 1	dlgap1	Oreochromis niloticus (Nile tilapia) (Tilapia nilotica)	signaling [GO:0023052]			QRLEARK	0.94292	-1.1874	0	0	0	0	0	0	0	0	0	0	0	0	0	0	0	0	0	0	8.6985	0	0	0	0	0	0	0	0	0	0	0	0	0	0	0	0	0	0	0	0	0
A0A669BWE0	C-1-tetrahydrofolate synthase, cytoplasmic (EC 1.5.1.5) (EC 3.5.4.9) (EC 6.3.4.3)		Oreochromis niloticus (Nile tilapia) (Tilapia nilotica)	tetrahydrofolate interconversion [GO:0035999]		ATP binding [GO:0005524]; formate-tetrahydrofolate ligase activity [GO:0004329]; methenyltetrahydrofolate cyclohydrolase activity [GO:0004477]; methylenetetrahydrofolate dehydrogenase (NADP+) activity [GO:0004488]	EVSAQVRER	0.92957	-1.0234	0	0	0	0	0	0	0	9.69417	0	0	0	0	0	0	0	0	0	0	0	0	0	0	0	0	0	0	0	0	0	0	0	0	0	0	0	0	0	0	0	0
A0A669BWF7	Rho GTPase activating protein 42	arhgap42	Oreochromis niloticus (Nile tilapia) (Tilapia nilotica)	signal transduction [GO:0007165]		GTPase activator activity [GO:0005096]	LKCHEIELERTNK	0.98835	-2.0336	0	0	0	13.9554	0	13.9974	0	0	0	0	0	10.8941	0	0	0	0	0	0	0	0	0	0	0	0	0	0	0	0	0	0	11.5172	0	0	0	0	0	0	0	0	0
A0A669BWG2	Neural EGFL like 2	nell2	Oreochromis niloticus (Nile tilapia) (Tilapia nilotica)	animal organ development [GO:0048513]		calcium ion binding [GO:0005509]	VVMIGFKK	0.99831	-2.2097	0	0	0	0	0	0	0	0	0	0	0	0	0	0	0	0	0	0	0	0	0	0	0	0	0	0	0	0	0	0	0	0	0	0	0	0	0	0	0	0
A0A669BWH3	SPARC-like protein 1	LOC100693466	Oreochromis niloticus (Nile tilapia) (Tilapia nilotica)		extracellular space [GO:0005615]	calcium ion binding [GO:0005509]	ETSGKEMAK	0.95745	-1.4646	0	0	0	0	0	0	0	0	0	0	0	0	0	0	0	0	0	0	0	0	0	0	0	0	0	0	0	0	0	0	0	0	0	0	0	0	0	0	0	0
A0A669BWH7	Histone H2A		Oreochromis niloticus (Nile tilapia) (Tilapia nilotica)		nucleosome [GO:0000786]; nucleus [GO:0005634]	DNA binding [GO:0003677]; protein heterodimerization activity [GO:0046982]; structural constituent of chromatin [GO:0030527]	AGLQFPVGR	0	18.407	10.7868	10.4368	10.2696	9.86346	9.72819	9.66219	11.6821	11.3982	11.1492	10.2963	10.0415	10.0545	10.4246	10.1356	10.0849	10.5905	10.2727	10.1324	8.90617	8.85755	8.52266	8.83687	0	0	9.47806	9.35931	9.51605	0	0	0	8.6189	8.608	0	8.22246	8.25456	8.14771	8.88515	8.67701	8.78542	0
A0A669BWS6	VWFD domain-containing protein		Oreochromis niloticus (Nile tilapia) (Tilapia nilotica)				DCHFKVDPEPYYHACVQESCSCEFEGK	0.98808	-1.6946	0	0	0	0	0	0	0	11.865	0	0	0	0	0	0	0	0	11.7206	0	0	0	0	0	0	0	0	0	0	0	0	0	0	0	0	0	0	0	0	0	0	0
A0A669BWU2	Transcription factor 7-like 1-B	LOC100693117	Oreochromis niloticus (Nile tilapia) (Tilapia nilotica)	Wnt signaling pathway [GO:0016055]	nucleus [GO:0005634]	DNA binding [GO:0003677]	TSSTASASEPK	0.9496	-0.82642	0	8.79416	0	0	0	0	0	9.55911	9.47717	0	0	0	0	0	0	0	0	0	0	0	0	0	0	0	0	9.61705	9.455	0	0	0	0	0	0	0	0	0	0	0	0	0
A0A669BWX6	EPH receptor A10	epha10	Oreochromis niloticus (Nile tilapia) (Tilapia nilotica)		plasma membrane [GO:0005886]	ATP binding [GO:0005524]; ephrin receptor activity [GO:0005003]	DCNSIPGVAGTCK	0.99642	-2.6359	0	0	0	0	0	0	0	0	0	0	0	0	0	0	0	0	0	0	0	0	0	0	0	0	0	0	0	0	0	0	0	0	9.16164	0	0	0	0	0	0	0
A0A669BX70	Lysine (K)-specific demethylase 7Ab	KDM7A	Oreochromis niloticus (Nile tilapia) (Tilapia nilotica)	chromatin organization [GO:0006325]	nucleus [GO:0005634]	dioxygenase activity [GO:0051213]; metal ion binding [GO:0046872]	LSRHNRVFV	0.9403	-0.89654	0	0	0	0	0	0	0	0	0	0	0	0	0	0	0	0	0	0	0	0	0	0	0	0	0	0	0	0	0	0	0	0	0	9.12686	0	9.04805	0	0	11.168	0
A0A669BX89	Olfactory receptor	LOC100690407	Oreochromis niloticus (Nile tilapia) (Tilapia nilotica)		plasma membrane [GO:0005886]	G protein-coupled receptor activity [GO:0004930]; olfactory receptor activity [GO:0004984]	IESSSPVLR	0.95613	-1.4585	0	0	0	0	0	0	0	0	0	0	0	0	0	0	0	0	0	0	0	0	0	0	0	0	0	0	0	0	0	0	0	0	0	10.3129	0	0	0	0	0	0
A0A669BXC0	NACHT, LRR and PYD domains-containing protein 3-like	LOC100700854	Oreochromis niloticus (Nile tilapia) (Tilapia nilotica)			GTP binding [GO:0005525]	QKYGPEK	0.99522	-2.1549	0	0	0	0	0	0	0	0	0	0	0	0	0	0	0	0	0	0	0	0	0	0	0	0	0	0	0	0	0	0	0	0	0	0	0	0	0	0	0	0
A0A669BXD4	Ubiquitin carboxyl-terminal hydrolase 19	LOC100705341	Oreochromis niloticus (Nile tilapia) (Tilapia nilotica)	protein deubiquitination [GO:0016579]; ubiquitin-dependent protein catabolic process [GO:0006511]		cysteine-type deubiquitinase activity [GO:0004843]	RPDQNLESD	0.96158	-1.498	0	0	10.0685	0	0	0	0	0	0	0	0	0	0	0	0	0	0	0	0	0	0	0	0	0	0	0	0	0	0	0	0	0	0	0	0	0	0	0	0	0
A0A669BXJ0	FERM and PDZ domain-containing protein 1	LOC100693353	Oreochromis niloticus (Nile tilapia) (Tilapia nilotica)	signal transduction [GO:0007165]	cytoskeleton [GO:0005856]		DFCLAAER	0.95119	-1.4103	0	0	0	0	0	0	0	0	0	0	0	0	0	0	0	0	0	0	0	0	0	0	0	0	0	0	0	0	0	0	0	0	0	0	0	0	0	0	0	0
A0A669BXM7	Protein HIRA	LOC100695474	Oreochromis niloticus (Nile tilapia) (Tilapia nilotica)	chromatin organization [GO:0006325]; DNA-templated transcription [GO:0006351]; regulation of DNA-templated transcription [GO:0006355]	nucleus [GO:0005634]		ELGYTTK	0.99385	-2.9784	0	0	0	0	0	0	0	0	0	0	0	0	0	0	0	0	0	0	0	0	0	0	0	0	0	0	0	0	0	0	0	0	0	0	0	0	0	0	0	0
A0A669BXN0	Kit ligand (Mast cell growth factor) (Stem cell factor) (c-Kit ligand)		Oreochromis niloticus (Nile tilapia) (Tilapia nilotica)	cell adhesion [GO:0007155]	cytoplasm [GO:0005737]; extracellular region [GO:0005576]; filopodium [GO:0030175]; lamellipodium [GO:0030027]; membrane [GO:0016020]	stem cell factor receptor binding [GO:0005173]	TFPPQILK	0.9578	-1.4755	0	0	0	0	0	0	0	0	0	0	0	0	0	0	0	0	0	0	0	0	0	0	0	0	0	0	0	12.8177	0	0	0	0	0	0	0	0	0	0	0	0
A0A669BXU3	Periostin	LOC100695303	Oreochromis niloticus (Nile tilapia) (Tilapia nilotica)				VSCSGGRKCDPSTD	0.93209	-1.0396	0	0	0	0	0	0	0	0	0	0	0	0	0	0	0	0	0	0	0	0	0	0	0	0	0	0	0	0	0	0	0	0	0	0	0	0	0	0	0	0
A0A669BXX2	Actin related protein 6	actr6	Oreochromis niloticus (Nile tilapia) (Tilapia nilotica)		intracellular organelle [GO:0043229]		KGFCKPR	0.93942	-0.99536	9.47565	0	0	0	0	0	0	0	0	0	0	0	0	0	0	0	0	0	0	0	0	0	0	0	0	0	0	0	0	0	0	0	0	0	0	0	0	0	0	0
A0A669BY35	Glutamate receptor	LOC100706002	Oreochromis niloticus (Nile tilapia) (Tilapia nilotica)		postsynaptic membrane [GO:0045211]	ionotropic glutamate receptor activity [GO:0004970]	GFGSDLK	0.99786	-2.4599	13.5074	9.29239	0	0	9.00039	0	9.08709	9.16842	0	0	12.3434	0	0	0	0	0	0	0	0	0	0	0	0	0	0	0	11.4838	12.9555	0	0	0	0	0	0	0	0	0	0	0	0
A0A669BY39	ATP-dependent DNA helicase (EC 3.6.4.12)		Oreochromis niloticus (Nile tilapia) (Tilapia nilotica)	DNA recombination [GO:0006310]; DNA repair [GO:0006281]; telomere maintenance [GO:0000723]		ATP binding [GO:0005524]; DNA helicase activity [GO:0003678]; hydrolase activity [GO:0016787]	EQLRRIYR	0.93703	-0.95296	0	0	0	0	0	0	0	0	0	0	0	0	0	0	0	0	0	0	0	0	0	0	0	0	0	0	0	0	0	0	0	0	0	0	0	0	0	0	0	0
A0A669BY44	RAB guanine nucleotide exchange factor (GEF) 1		Oreochromis niloticus (Nile tilapia) (Tilapia nilotica)	vesicle-mediated transport [GO:0016192]		DNA binding [GO:0003677]; guanyl-nucleotide exchange factor activity [GO:0005085]; zinc ion binding [GO:0008270]	QKQIQDDWALAEK	0.98934	-1.7154	0	0	0	0	0	0	0	0	0	0	0	0	0	0	0	0	0	0	0	0	0	0	0	0	0	0	0	0	0	0	0	0	0	0	0	0	0	0	0	0
A0A669BY72	receptor protein-tyrosine kinase (EC 2.7.10.1)	tie1	Oreochromis niloticus (Nile tilapia) (Tilapia nilotica)	anatomical structure development [GO:0048856]	plasma membrane [GO:0005886]	ATP binding [GO:0005524]; transmembrane receptor protein tyrosine kinase activity [GO:0004714]	VSTDGGQDSR	0.95109	-1.2231	0	0	0	0	0	0	0	0	0	0	0	0	0	0	0	0	0	0	0	0	0	0	0	0	0	0	0	0	0	0	0	0	0	0	0	0	0	0	0	0
A0A669BYE5	Stress induced phosphoprotein 1	stip1	Oreochromis niloticus (Nile tilapia) (Tilapia nilotica)		cytoplasm [GO:0005737]		GSLKDQGNK	0.99504	-2.7835	0	0	0	0	0	0	0	0	8.97439	0	0	0	0	0	0	0	0	0	0	0	0	0	0	0	0	0	0	0	0	0	0	0	0	0	0	0	0	0	0	0
A0A669BYI5	CUGBP Elav-like family member 1	celf1	Oreochromis niloticus (Nile tilapia) (Tilapia nilotica)	mRNA processing [GO:0006397]	cytoplasm [GO:0005737]; nucleus [GO:0005634]; ribonucleoprotein complex [GO:1990904]	RNA binding [GO:0003723]	KLFIGMISKK	0.93169	-1.0404	0	0	0	0	0	0	0	0	0	0	0	0	13.0585	0	0	0	0	0	0	0	0	0	0	0	0	0	0	0	0	0	0	0	0	0	0	0	0	0	0	0
A0A669BYJ4	Succinate dehydrogenase assembly factor 3 (SDH assembly factor 3) (SDHAF3)		Oreochromis niloticus (Nile tilapia) (Tilapia nilotica)	mitochondrial respiratory chain complex II assembly [GO:0034553]	mitochondrial matrix [GO:0005759]		QSTSLLTK	0.96011	-1.4776	0	0	0	0	0	0	0	10.9205	0	0	0	0	0	0	0	0	0	0	0	0	0	0	0	0	0	0	0	0	0	0	0	0	0	0	0	0	0	0	0	0
A0A669BYL8	ATP-dependent RNA helicase (EC 3.6.4.13)		Oreochromis niloticus (Nile tilapia) (Tilapia nilotica)			ATP binding [GO:0005524]; hydrolase activity [GO:0016787]; nucleic acid binding [GO:0003676]; RNA helicase activity [GO:0003724]	KELEEMK	0.99749	-2.2955	0	0	0	0	0	0	0	0	0	0	0	0	0	0	0	0	0	0	0	0	0	0	0	0	0	0	0	0	0	0	0	0	0	0	0	0	0	0	0	0
A0A669BYM8	5'-AMP-activated protein kinase subunit beta-1	LOC100704877	Oreochromis niloticus (Nile tilapia) (Tilapia nilotica)	fatty acid biosynthetic process [GO:0006633]	cytoplasm [GO:0005737]		MGNSSSDR	0.99463	-2.9621	0	0	0	0	0	0	13.0765	0	0	0	0	0	0	0	0	0	0	0	0	0	0	0	10.9694	0	0	0	0	0	0	0	0	0	0	0	0	0	0	0	0	0
A0A669BYR6	glutaminase (EC 3.5.1.2)	LOC100694977	Oreochromis niloticus (Nile tilapia) (Tilapia nilotica)	glutamine metabolic process [GO:0006541]		glutaminase activity [GO:0004359]	VQKQSDGK	0.97813	-1.5649	0	0	0	0	0	0	0	0	0	0	0	0	0	0	0	8.60744	0	0	0	0	0	0	0	0	0	0	0	0	0	0	0	0	0	0	0	0	0	0	0	0
A0A669BZ39	ATPase family AAA domain containing 2B	atad2b	Oreochromis niloticus (Nile tilapia) (Tilapia nilotica)			ATP binding [GO:0005524]; ATP hydrolysis activity [GO:0016887]	ALCTEAALMALRR	0.99524	-2.9276	0	0	0	0	0	9.31123	0	0	0	0	0	0	0	0	0	0	0	0	0	0	0	0	0	0	0	0	0	0	0	0	0	0	0	0	0	0	0	0	0	0
A0A669BZ43	Myopalladin	MYPN	Oreochromis niloticus (Nile tilapia) (Tilapia nilotica)		membrane [GO:0016020]		EPPPVLAKPK	0.9598	-1.5022	0	0	0	0	0	0	0	0	0	0	0	0	0	0	0	0	0	0	0	0	0	0	0	0	0	0	0	0	0	0	0	0	0	0	0	0	0	0	0	0
A0A669BZ81	Gamma-crystallin M2-like	LOC100699427	Oreochromis niloticus (Nile tilapia) (Tilapia nilotica)				NVYGKSWK	0.98582	-1.5929	0	0	0	0	0	0	0	0	0	0	0	0	0	0	0	0	0	0	0	0	0	0	0	0	0	0	0	0	0	0	0	0	0	0	0	0	0	9.27864	0	0
A0A669BZE5	Roundabout homolog 2	LOC100700503	Oreochromis niloticus (Nile tilapia) (Tilapia nilotica)		membrane [GO:0016020]		GEHFSPER	0.99847	-2.2048	0	0	0	0	0	0	0	0	0	0	0	0	0	0	0	0	0	0	0	0	0	0	0	0	0	0	0	0	0	0	0	0	0	0	0	0	0	0	0	0
A0A669BZL6	Elongator complex protein 1	elp1	Oreochromis niloticus (Nile tilapia) (Tilapia nilotica)	tRNA wobble uridine modification [GO:0002098]	cytoplasm [GO:0005737]; elongator holoenzyme complex [GO:0033588]; nucleus [GO:0005634]		NLKLLKSLR	0.99222	-3.1203	0	8.45681	0	0	0	0	0	0	0	0	0	0	0	0	0	0	0	0	0	0	0	0	0	0	0	0	0	0	0	0	0	0	0	0	0	0	0	0	0	0
A0A669BZQ1	Short chain dehydrogenase/reductase family 16C member 5	sdr16c5	Oreochromis niloticus (Nile tilapia) (Tilapia nilotica)			oxidoreductase activity [GO:0016491]	SSIRTLKR	0.99562	-2.6555	8.93996	0	0	0	0	0	0	0	0	0	0	0	0	0	0	0	0	0	0	0	0	0	0	0	0	0	0	0	0	0	0	0	0	0	0	0	0	0	0	0
A0A669C028	Cell division control protein 42 homolog (EC 3.6.5.2)		Oreochromis niloticus (Nile tilapia) (Tilapia nilotica)	anatomical structure morphogenesis [GO:0009653]; establishment or maintenance of cell polarity [GO:0007163]; positive regulation of cellular component organization [GO:0051130]; small GTPase mediated signal transduction [GO:0007264]	cytoplasm [GO:0005737]; membrane-bounded organelle [GO:0043227]; midbody [GO:0030496]; plasma membrane [GO:0005886]	G protein activity [GO:0003925]; GTP binding [GO:0005525]	YVECSALTQK	0.040541	-0.2719	10.0534	9.86281	9.74179	9.09519	9.09228	9.11938	11.0172	10.924	10.9382	0	0	0	9.19763	9.31859	9.21917	10.3296	10.3316	10.2975	0	0	0	9.12774	9.09498	9.08433	10.1042	0	10.2733	0	0	0	8.95094	0	9.03922	0	0	8.69199	9.08895	9.26148	9.22656	0
A0A669C0B5	Solute carrier family 26 member 6	slc26a6	Oreochromis niloticus (Nile tilapia) (Tilapia nilotica)		membrane [GO:0016020]	secondary active sulfate transmembrane transporter activity [GO:0008271]	QCLLYVRK	0.98467	-1.7356	0	0	0	0	0	0	0	0	0	0	0	0	0	0	0	0	0	0	0	0	0	0	0	0	0	0	0	10.0566	0	0	0	0	0	0	0	0	0	0	0	0
A0A669C0D7	Myotubularin-related protein 9	LOC100702538	Oreochromis niloticus (Nile tilapia) (Tilapia nilotica)				FHRPMERGK	0.98249	-1.6444	0	0	0	0	0	0	0	0	0	0	0	0	0	0	0	0	0	0	0	0	0	0	0	0	0	0	0	0	0	0	0	0	0	0	0	0	0	0	0	0
A0A669C0E8	Cullin 4B		Oreochromis niloticus (Nile tilapia) (Tilapia nilotica)	ubiquitin-dependent protein catabolic process [GO:0006511]		ubiquitin protein ligase binding [GO:0031625]	DIMVQFK	0.98596	-1.5073	0	0	0	0	8.84295	0	0	0	0	0	0	0	0	0	0	0	0	0	0	0	0	0	0	0	0	0	0	0	0	0	0	0	0	0	0	0	0	0	0	0
A0A669C0H1	Bromodomain and PHD finger-containing protein 3	LOC100699843	Oreochromis niloticus (Nile tilapia) (Tilapia nilotica)		nucleus [GO:0005634]	metal ion binding [GO:0046872]	GGAFKQTSDGR	0.9966	-2.1774	0	0	0	0	0	0	0	0	0	0	0	0	0	0	0	0	0	0	0	0	0	0	0	0	0	0	0	0	0	0	0	0	0	0	0	0	0	0	0	0
A0A669C0J4	La ribonucleoprotein 4B	LARP4B	Oreochromis niloticus (Nile tilapia) (Tilapia nilotica)			RNA binding [GO:0003723]	EGCDSSR	0.98214	-1.5892	0	0	0	0	0	0	0	0	0	0	0	0	0	0	0	0	0	0	0	0	0	0	0	0	0	0	0	0	0	0	0	0	0	0	0	0	0	0	0	0
A0A669C0N6	Protein kinase domain containing, cytoplasmic	pkdcc	Oreochromis niloticus (Nile tilapia) (Tilapia nilotica)		membrane [GO:0016020]	ATP binding [GO:0005524]; non-membrane spanning protein tyrosine kinase activity [GO:0004715]	NFTLPCSAR	0.95087	-1.2736	0	0	0	0	0	0	0	0	0	0	0	0	0	0	0	0	0	0	0	0	0	0	0	10.2911	0	0	0	0	0	0	0	0	0	0	0	0	0	0	0	0
A0A669C0R0	Tyrosine-protein kinase (EC 2.7.10.2)	hck	Oreochromis niloticus (Nile tilapia) (Tilapia nilotica)			ATP binding [GO:0005524]; non-membrane spanning protein tyrosine kinase activity [GO:0004715]	CFPCHHK	0.98852	-2.0335	0	0	0	0	0	0	0	0	0	0	0	0	0	0	0	0	0	0	0	0	0	0	0	0	0	0	0	0	0	0	0	0	0	0	0	0	0	0	0	0
A0A669C0R9	Ubiquilin 4	UBQLN4	Oreochromis niloticus (Nile tilapia) (Tilapia nilotica)				LLGSQPS	0.99034	-1.5073	0	0	0	0	0	0	0	0	0	0	0	0	0	0	0	0	0	0	0	0	0	10.2655	0	10.3597	0	0	0	0	0	0	0	0	0	0	0	0	0	0	0	0
A0A669C0Y7	non-specific serine/threonine protein kinase (EC 2.7.11.1)	lrrk1	Oreochromis niloticus (Nile tilapia) (Tilapia nilotica)	protein phosphorylation [GO:0006468]; regulation of signal transduction [GO:0009966]		ATP binding [GO:0005524]; GTP binding [GO:0005525]; protein serine/threonine kinase activity [GO:0004674]	RMACPGSRISCQMK	0.93028	-1.0147	0	0	0	0	0	0	0	0	0	0	0	0	0	0	0	0	0	0	0	0	0	0	0	0	0	0	0	0	0	0	0	0	0	0	0	0	0	0	0	0
A0A669C0Z1	Sema domain, immunoglobulin domain (Ig), short basic domain, secreted, (semaphorin) 3Ga		Oreochromis niloticus (Nile tilapia) (Tilapia nilotica)	axon guidance [GO:0007411]		semaphorin receptor binding [GO:0030215]	ILDRDIVLALTAQDEDEEPK	0.97546	-1.552	0	0	11.097	0	0	0	0	0	0	0	0	0	0	0	0	0	0	0	0	0	0	0	0	0	0	0	0	0	0	0	0	0	0	0	0	0	0	0	0	0
A0A669C130	ATP-binding cassette, sub-family A (ABC1), member 12		Oreochromis niloticus (Nile tilapia) (Tilapia nilotica)		membrane [GO:0016020]	ABC-type transporter activity [GO:0140359]; ATP binding [GO:0005524]; ATP hydrolysis activity [GO:0016887]	EKLGQGYKLTLTK	0.99362	-3.5961	0	0	0	0	0	0	0	0	0	0	0	0	0	0	0	0	0	0	0	0	0	0	0	0	0	0	0	0	0	0	0	0	0	0	0	0	8.9851	0	0	0
A0A669C140	Myosin VIIAa		Oreochromis niloticus (Nile tilapia) (Tilapia nilotica)	system development [GO:0048731]	cytoplasm [GO:0005737]; myosin complex [GO:0016459]; plasma membrane bounded cell projection [GO:0120025]	actin binding [GO:0003779]; ATP binding [GO:0005524]; cytoskeletal motor activity [GO:0003774]	FAKFAATYFQGTTTHTYVR	0.99369	-2.9774	0	0	0	0	0	0	0	0	0	0	9.56468	0	0	0	0	0	0	0	0	0	0	0	0	0	0	0	0	0	0	0	0	0	0	0	0	0	0	0	0	0
A0A669C162	Vesicle transport through interaction with t-SNAREs 1A		Oreochromis niloticus (Nile tilapia) (Tilapia nilotica)	intracellular protein transport [GO:0006886]; vesicle-mediated transport [GO:0016192]	cytoplasm [GO:0005737]; intracellular membrane-bounded organelle [GO:0043231]; membrane [GO:0016020]		SSRILTGMLR	0.97806	-1.5814	0	0	0	0	0	0	0	0	0	0	0	0	0	0	0	0	0	0	0	0	0	0	0	0	0	0	0	0	0	0	0	0	0	0	0	0	0	10.2108	10.2726	0
A0A669C196	Inhibin beta B chain (Activin beta-B chain)	INHBB	Oreochromis niloticus (Nile tilapia) (Tilapia nilotica)		extracellular region [GO:0005576]	growth factor activity [GO:0008083]	LVFEKGDRR	0.99016	-1.9451	0	0	0	0	10.3775	0	0	0	0	0	0	0	0	0	0	0	0	0	0	0	0	0	0	0	0	0	0	0	0	0	0	0	0	0	0	0	0	0	9.37821	0
A0A669C1A2	Zinc finger protein 521	ZNF521	Oreochromis niloticus (Nile tilapia) (Tilapia nilotica)	macromolecule metabolic process [GO:0043170]; nitrogen compound metabolic process [GO:0006807]; primary metabolic process [GO:0044238]			ASPSQTEEK	0.95557	-1.4619	0	0	0	0	0	0	0	0	0	0	0	0	0	0	0	0	0	0	0	0	0	0	0	0	0	0	0	0	0	0	0	0	0	0	10.4103	0	0	0	0	0
A0A669C1B8	Uncharacterized protein		Oreochromis niloticus (Nile tilapia) (Tilapia nilotica)				YGECWAR	0.98742	-1.5073	0	0	12.8535	0	0	0	0	0	0	0	0	0	0	0	0	0	0	0	0	0	0	0	0	0	0	0	0	0	0	0	0	0	0	0	0	0	0	0	0	0
A0A669C1D2	Rac GTPase activating protein 1		Oreochromis niloticus (Nile tilapia) (Tilapia nilotica)	cell development [GO:0048468]; signal transduction [GO:0007165]		metal ion binding [GO:0046872]	GSLEVKLKHAR	0.94043	-0.92578	0	0	0	0	0	0	0	0	0	0	0	0	0	0	0	0	0	0	0	0	0	0	0	0	0	0	0	0	0	0	10.7737	0	0	0	0	0	0	0	0	0
A0A669C1F6	Uncharacterized LOC102077955	LOC102077955	Oreochromis niloticus (Nile tilapia) (Tilapia nilotica)			metal ion binding [GO:0046872]	KGGLEEGSER	0.99504	-2.7846	0	0	0	0	0	0	0	0	0	0	0	0	0	0	0	0	0	0	0	0	0	0	0	0	0	0	0	0	0	0	0	0	0	0	0	0	0	0	0	0
A0A669C1K9	NACHT domain-containing protein		Oreochromis niloticus (Nile tilapia) (Tilapia nilotica)				NELQKIHK	0.97831	-1.584	0	9.34662	9.13645	0	0	0	0	0	0	0	0	0	0	0	0	0	0	0	0	0	0	0	0	0	0	0	0	0	0	0	0	0	0	0	0	0	10.6716	0	0	0
A0A669C1Q5	Protein MMS22-like (Methyl methanesulfonate-sensitivity protein 22-like)	mms22l	Oreochromis niloticus (Nile tilapia) (Tilapia nilotica)	chromatin organization [GO:0006325]; double-strand break repair via homologous recombination [GO:0000724]; replication fork processing [GO:0031297]	chromosome [GO:0005694]; nucleus [GO:0005634]		LLFGLFRQR	0.9942	-3.0442	9.89148	0	0	0	0	0	0	0	0	0	0	0	0	0	0	0	0	0	0	0	0	0	0	0	0	0	0	0	0	0	0	0	0	11.0605	0	0	0	0	0	0
A0A669C1T2	Dysferlin, limb girdle muscular dystrophy 2B (autosomal recessive)		Oreochromis niloticus (Nile tilapia) (Tilapia nilotica)		cytoplasmic vesicle membrane [GO:0030659]; plasma membrane [GO:0005886]	metal ion binding [GO:0046872]	FYASTGEKNK	0.99303	-3.1752	0	0	0	0	0	0	0	0	0	0	0	0	0	0	0	0	0	0	0	0	0	0	0	0	0	0	0	0	0	0	0	0	0	0	0	0	10.4221	0	0	0
A0A669C1W5	Integrator complex subunit 11 (Cleavage and polyadenylation-specific factor 3-like protein)	ints11	Oreochromis niloticus (Nile tilapia) (Tilapia nilotica)				NLCTEKHV	0.98483	-1.5932	9.08359	0	0	0	0	0	0	0	0	0	0	0	0	0	0	0	0	0	0	0	0	0	0	0	0	0	0	0	0	0	0	0	0	0	0	0	0	0	0	0
A0A669C228	Regulator of G-protein signaling 14	LOC100694276	Oreochromis niloticus (Nile tilapia) (Tilapia nilotica)	signal transduction [GO:0007165]	dendrite [GO:0030425]	GTPase activator activity [GO:0005096]	KTPNSAK	0.99339	-3.2879	0	0	0	0	0	0	0	0	0	0	0	0	0	0	0	0	0	0	0	0	0	0	0	0	0	0	0	0	0	0	0	0	0	0	0	0	0	0	0	0
A0A669C240	GDP-fucose protein O-fucosyltransferase 2 (EC 2.4.1.221) (Peptide-O-fucosyltransferase 2)		Oreochromis niloticus (Nile tilapia) (Tilapia nilotica)	fucose metabolic process [GO:0006004]	membrane [GO:0016020]	peptide-O-fucosyltransferase activity [GO:0046922]	LMYSKDKHGYYR	0.94234	-0.79285	0	0	0	0	0	0	0	0	0	0	0	0	0	0	0	0	0	0	0	0	0	0	0	0	0	0	0	0	0	0	0	0	0	0	0	0	0	0	0	0
A0A669C261	Ig-like domain-containing protein		Oreochromis niloticus (Nile tilapia) (Tilapia nilotica)		membrane [GO:0016020]		GGRGNSVYYTEDSQSVRIDK	0.94352	-1.2142	0	0	0	0	0	0	0	0	0	0	0	0	0	0	8.65026	0	8.82645	0	0	0	0	0	0	0	0	0	0	0	0	0	0	0	0	0	0	0	0	0	0	0
A0A669C2D5	NACHT domain-containing protein		Oreochromis niloticus (Nile tilapia) (Tilapia nilotica)				LVSDITQK	0.95742	-1.4542	0	0	0	0	0	0	0	0	0	0	0	0	0	0	0	0	0	0	0	0	0	0	0	0	0	9.70422	0	0	0	0	0	0	0	0	0	0	0	0	0	0
A0A669C2G2	C2H2-type domain-containing protein		Oreochromis niloticus (Nile tilapia) (Tilapia nilotica)				VDNTAVSMSQSQTGTR	0.99669	-4.0722	0	0	0	0	0	0	0	0	0	0	0	0	0	0	0	0	0	0	0	0	0	0	0	0	0	0	0	0	0	0	0	0	0	0	0	0	0	0	0	0
A0A669C2K7	ST3 beta-galactoside alpha-2,3-sialyltransferase 1	ST3GAL1	Oreochromis niloticus (Nile tilapia) (Tilapia nilotica)	protein glycosylation [GO:0006486]	Golgi apparatus [GO:0005794]; membrane [GO:0016020]	sialyltransferase activity [GO:0008373]	YVRVVKLDK	0.94444	-0.85613	0	0	0	0	0	0	0	0	0	0	0	0	0	0	0	0	0	0	0	0	0	0	0	0	0	0	0	0	0	0	0	0	0	0	0	10.3142	0	0	0	0
A0A669C2N0	Mitogen-activated protein kinase 8 interacting protein 3		Oreochromis niloticus (Nile tilapia) (Tilapia nilotica)		cytoplasm [GO:0005737]	MAP-kinase scaffold activity [GO:0005078]	NKVDARIK	0.93881	-0.95262	0	0	0	0	0	0	0	0	0	0	0	12.5626	0	0	0	0	0	0	0	0	0	0	0	0	0	0	0	0	0	0	0	0	0	0	0	0	0	0	0	0
A0A669C2N7	ATP-binding cassette, sub-family C (CFTR/MRP), member 4		Oreochromis niloticus (Nile tilapia) (Tilapia nilotica)		membrane [GO:0016020]	ABC-type transporter activity [GO:0140359]; ATP binding [GO:0005524]; ATP hydrolysis activity [GO:0016887]	GENSIEIEKLTCYWDK	0.99574	-2.1668	0	0	11.9315	0	0	0	12.179	0	0	0	0	0	0	0	0	0	0	0	0	0	0	0	0	0	0	0	0	0	0	0	0	0	0	0	0	0	0	0	0	0
A0A669C2Q4	Interleukin 1 receptor associated kinase 1	irak1	Oreochromis niloticus (Nile tilapia) (Tilapia nilotica)	cellular response to chemical stimulus [GO:0070887]; protein phosphorylation [GO:0006468]; regulation of response to stimulus [GO:0048583]	cytoplasm [GO:0005737]	ATP binding [GO:0005524]; protein kinase activity [GO:0004672]	RKRPVMK	0.93108	-0.98403	0	0	0	0	0	0	0	0	0	0	0	0	0	0	0	0	0	0	0	0	0	0	0	0	0	0	0	0	0	0	0	0	0	0	0	0	0	0	0	0
A0A669C2S3	Fork-head domain-containing protein		Oreochromis niloticus (Nile tilapia) (Tilapia nilotica)	anatomical structure morphogenesis [GO:0009653]; system development [GO:0048731]	nucleus [GO:0005634]	DNA-binding transcription factor activity [GO:0003700]; sequence-specific DNA binding [GO:0043565]	GGFWKIDPQYAERLLSGAYK	0.9184	-0.65562	0	0	0	0	0	0	0	0	0	10.0937	0	0	0	0	0	0	0	0	0	0	0	0	0	0	0	0	0	0	0	0	0	0	0	0	0	0	0	0	0	0
A0A669C2Y7	Isocitrate dehydrogenase [NADP] (EC 1.1.1.42)	LOC100707874	Oreochromis niloticus (Nile tilapia) (Tilapia nilotica)	glyoxylate cycle [GO:0006097]; isocitrate metabolic process [GO:0006102]; tricarboxylic acid cycle [GO:0006099]		isocitrate dehydrogenase (NADP+) activity [GO:0004450]; magnesium ion binding [GO:0000287]; NAD binding [GO:0051287]	NTIKISLSR	0.97762	-1.5718	0	0	0	0	0	0	0	0	0	0	0	0	0	0	0	0	0	0	0	0	0	0	0	0	8.97393	0	0	0	0	0	0	0	0	0	0	0	0	0	0	0
A0A669C304	SLIT-ROBO Rho GTPase activating protein 1b		Oreochromis niloticus (Nile tilapia) (Tilapia nilotica)	signal transduction [GO:0007165]			ATLVVMR	1.0028	-1.5073	0	0	0	0	0	0	0	0	0	0	0	0	0	0	0	0	0	0	0	0	0	0	0	0	0	0	0	0	0	0	0	0	0	0	0	0	0	0	0	0
A0A669C335	Kinesin-like protein	kif11	Oreochromis niloticus (Nile tilapia) (Tilapia nilotica)	cell cycle [GO:0007049]; cell division [GO:0051301]; microtubule-based movement [GO:0007018]; system development [GO:0048731]	microtubule [GO:0005874]	ATP binding [GO:0005524]; microtubule binding [GO:0008017]; microtubule motor activity [GO:0003777]	RDLAATRDK	0.92922	-0.70891	0	0	0	0	0	0	0	0	0	0	0	0	0	0	0	0	0	0	0	0	0	0	0	0	0	0	0	0	0	12.4152	0	0	0	0	0	13.0775	0	0	0	0
A0A669C3C6	Tc1-like transposase DDE domain-containing protein		Oreochromis niloticus (Nile tilapia) (Tilapia nilotica)			nucleic acid binding [GO:0003676]	KGGYSGR	0.94358	-1.1874	0	0	0	0	0	0	0	0	0	0	0	0	0	0	0	0	0	0	0	0	0	0	0	0	0	9.65735	0	0	0	0	0	0	0	0	0	0	0	0	0	0
A0A669C3F6	AIG1-type G domain-containing protein		Oreochromis niloticus (Nile tilapia) (Tilapia nilotica)			GTP binding [GO:0005525]	EFATFLK	0.9926	-3.2389	0	0	11.8591	0	0	0	0	0	0	0	0	0	0	0	0	0	0	0	0	0	0	0	0	0	0	0	0	0	0	0	0	0	0	0	0	0	0	0	0	0
A0A669C3L8	WD_REPEATS_REGION domain-containing protein		Oreochromis niloticus (Nile tilapia) (Tilapia nilotica)				LWDRDTKK	0.9994	-4.3423	0	0	0	9.90197	0	9.69373	0	0	0	0	0	0	0	0	0	0	0	0	0	0	0	0	0	0	0	0	0	0	0	0	0	0	0	0	0	0	0	0	0	0
A0A669C3R3	Trypsin-2	LOC100699793	Oreochromis niloticus (Nile tilapia) (Tilapia nilotica)	proteolysis [GO:0006508]	extracellular space [GO:0005615]	serine-type endopeptidase activity [GO:0004252]	FTLRNFVI	0.9858	-1.5925	0	0	0	0	0	0	0	0	0	0	0	0	0	0	0	0	0	0	0	0	0	0	0	0	0	0	0	0	0	0	0	0	0	0	0	0	0	0	0	0
A0A669C3U0	Midnolin	LOC100691436	Oreochromis niloticus (Nile tilapia) (Tilapia nilotica)		nucleus [GO:0005634]		SPLTLALR	0.95804	-1.4708	0	0	0	0	0	0	0	0	0	10.6209	0	0	0	0	0	0	0	0	0	0	0	0	0	0	0	0	0	0	0	0	0	0	0	0	0	0	0	0	0	0
A0A669C425	GTPase IMAP family member 8-like	LOC100694918	Oreochromis niloticus (Nile tilapia) (Tilapia nilotica)			GTP binding [GO:0005525]	LLQTFRQR	0.98544	-1.5929	0	0	0	0	0	0	0	0	0	0	0	0	0	0	0	0	0	0	0	0	0	0	0	0	0	0	0	0	0	0	0	0	0	0	0	0	0	0	0	0
A0A669C466	Caskin-1	LOC100701096	Oreochromis niloticus (Nile tilapia) (Tilapia nilotica)				LAEMQRSSDGR	0.99801	-2.4182	0	0	0	0	0	0	0	0	0	0	0	0	0	0	0	0	0	0	0	0	0	0	0	0	0	0	0	0	0	0	0	0	0	0	0	0	0	0	0	0
A0A669C4A3	Nucleoside diphosphate kinase (EC 2.7.4.6)	LOC100696772	Oreochromis niloticus (Nile tilapia) (Tilapia nilotica)	cell cycle [GO:0007049]; CTP biosynthetic process [GO:0006241]; GTP biosynthetic process [GO:0006183]; nucleoside diphosphate phosphorylation [GO:0006165]; UTP biosynthetic process [GO:0006228]	cytoplasm [GO:0005737]; lamellipodium [GO:0030027]; nucleus [GO:0005634]; ruffle [GO:0001726]	ATP binding [GO:0005524]; nucleoside diphosphate kinase activity [GO:0004550]	EISLWFKDDELVNYSSCAFSWLY	0	3.5836	0	0	0	0	0	0	9.41405	9.12335	0	0	0	0	0	0	0	0	0	0	0	0	0	0	0	0	0	0	0	0	0	0	0	0	0	0	0	0	0	0	0	0
A0A669C4F0	Rho GTPase activating protein 44		Oreochromis niloticus (Nile tilapia) (Tilapia nilotica)	signal transduction [GO:0007165]	cytoplasm [GO:0005737]		IAPSASKLK	0.97797	-1.5869	0	0	0	0	0	0	0	0	0	0	0	0	0	0	0	0	0	0	0	0	0	0	0	0	0	0	0	0	0	0	0	0	0	0	0	0	0	0	0	0
A0A669C4H9	Uncharacterized LOC102078926	LOC102078926	Oreochromis niloticus (Nile tilapia) (Tilapia nilotica)				EVEVEEKGLMMSHEVQWK	0.98787	-1.6858	0	0	0	0	0	0	0	0	0	0	0	0	0	0	0	0	0	0	0	0	0	0	0	0	0	0	0	0	0	0	0	0	0	0	0	0	0	0	0	0
A0A669C4J3	Kynurenine 3-monooxygenase	kmo	Oreochromis niloticus (Nile tilapia) (Tilapia nilotica)			FAD binding [GO:0071949]; monooxygenase activity [GO:0004497]	HVGLEEK	0.99552	-1.5073	0	12.4958	0	0	0	0	0	0	0	0	0	0	0	0	0	0	0	0	0	0	0	0	0	0	0	0	0	0	0	0	0	0	0	0	0	0	0	0	0	0
A0A669C4Q2	Complement factor I	cfi	Oreochromis niloticus (Nile tilapia) (Tilapia nilotica)	proteolysis [GO:0006508]	extracellular space [GO:0005615]; membrane [GO:0016020]	scavenger receptor activity [GO:0005044]; serine-type endopeptidase activity [GO:0004252]	KELLVCKK	0.98614	-1.7328	0	0	0	0	0	0	0	0	0	0	0	0	0	0	0	0	0	0	0	0	0	0	0	0	0	0	0	0	0	0	0	0	0	0	0	0	0	0	0	0
A0A669C4U4	Si:dkeyp-93d12.1		Oreochromis niloticus (Nile tilapia) (Tilapia nilotica)				CKVVSQLYVKNK	0.96146	-1.4929	0	0	0	0	0	0	0	0	0	0	0	0	0	0	0	0	0	0	0	0	0	0	0	0	0	0	0	0	0	0	0	0	0	0	0	0	0	0	9.1518	0
A0A669C4V8	Rho GTPase-activating protein 17	LOC100693200	Oreochromis niloticus (Nile tilapia) (Tilapia nilotica)	signal transduction [GO:0007165]	cytoplasm [GO:0005737]		MMDVCGEAESK	0.99355	-3.0031	0	0	0	0	0	0	0	0	0	0	0	0	0	0	0	0	0	0	0	0	0	0	0	0	0	0	0	0	0	0	0	0	0	0	0	0	0	0	0	0
A0A669C4Z6	Integrase catalytic domain-containing protein		Oreochromis niloticus (Nile tilapia) (Tilapia nilotica)	DNA integration [GO:0015074]		nucleic acid binding [GO:0003676]	TLSRLKNR	0.93605	-0.95296	0	0	0	0	0	0	0	0	0	0	0	0	0	0	0	0	0	0	0	0	0	0	0	0	0	0	0	0	0	0	0	0	13.0295	0	0	0	0	0	0	0
A0A669C516	Anoctamin	ano10	Oreochromis niloticus (Nile tilapia) (Tilapia nilotica)		membrane [GO:0016020]		LTFSGSR	0.98621	-1.5073	0	0	0	0	15.2334	0	0	0	0	0	0	0	11.2019	0	0	0	11.778	0	0	0	0	0	0	0	10.8668	0	0	0	0	0	0	0	0	11.9451	12.2013	0	0	0	0	0
A0A669C5C7	HECT and RLD domain containing E3 ubiquitin protein ligase 4		Oreochromis niloticus (Nile tilapia) (Tilapia nilotica)			ubiquitin-protein transferase activity [GO:0004842]	EKLLQAIDHNQGFNLA	0.99751	-2.3908	0	0	0	0	0	0	0	0	0	0	0	0	0	0	0	0	0	0	0	0	0	0	0	0	0	0	0	0	0	0	0	0	0	0	0	0	0	0	0	0
A0A669C5C9	PiggyBac transposable element-derived protein domain-containing protein		Oreochromis niloticus (Nile tilapia) (Tilapia nilotica)				CTVHQAR	0.99419	-3.0219	0	0	0	0	0	11.0656	0	0	0	0	0	0	0	0	0	0	0	0	0	0	0	0	0	0	0	0	0	0	0	0	0	0	0	0	0	0	0	0	0	0
A0A669C5D9	ribonuclease H (EC 3.1.26.4)		Oreochromis niloticus (Nile tilapia) (Tilapia nilotica)	DNA integration [GO:0015074]; proteolysis [GO:0006508]		aspartic-type endopeptidase activity [GO:0004190]; nucleic acid binding [GO:0003676]; zinc ion binding [GO:0008270]	LVIPANMR	0.99392	-3.5703	0	11.4128	0	11.389	11.3499	11.3556	0	11.2493	11.3635	11.685	10.6242	10.8211	10.6841	10.6814	10.581	10.6493	10.6475	10.9559	10.8519	10.4722	10.5379	10.5054	10.4836	10.5704	10.6083	10.589	10.62	10.8645	10.4667	10.5509	10.75	10.6388	10.5168	10.5924	10.4351	10.4567	0	10.4207	10.4913	10.5382
A0A669C5S9	Bassoon (presynaptic cytomatrix protein) b		Oreochromis niloticus (Nile tilapia) (Tilapia nilotica)				KAQLMQR	0.99449	-3.3669	0	0	0	0	0	0	0	0	0	0	0	0	0	0	0	0	0	0	0	0	0	0	0	0	0	0	0	0	0	0	0	0	0	0	0	0	0	0	0	0
A0A669C5V9	PHD finger protein 10	phf10	Oreochromis niloticus (Nile tilapia) (Tilapia nilotica)	nervous system development [GO:0007399]	npBAF complex [GO:0071564]	metal ion binding [GO:0046872]	CSSCDIR	0.98524	-1.5073	0	0	0	0	0	0	0	12.793	0	13.4624	0	0	0	0	0	0	0	0	0	0	0	0	0	0	0	0	0	0	0	0	0	0	0	0	0	0	0	0	0	0
A0A669C5Y3	chitin synthase (EC 2.4.1.16)	LOC102076176	Oreochromis niloticus (Nile tilapia) (Tilapia nilotica)		membrane [GO:0016020]	chitin synthase activity [GO:0004100]	EEHKDCFDFECHILMDDAFMTDDDTNK	0.99361	-3.5208	0	0	0	0	0	0	0	0	0	0	0	0	0	0	11.2255	0	0	11.66	0	0	0	0	0	0	0	0	0	0	0	0	0	0	0	0	0	0	12.327	0	0	0
A0A669C5Y6	EFR3 homolog B		Oreochromis niloticus (Nile tilapia) (Tilapia nilotica)				KLQDAVIK	0.99407	-3.5607	0	0	0	0	0	0	0	0	0	0	0	0	0	0	0	0	0	0	0	0	0	0	0	0	0	0	0	0	0	0	0	0	0	0	0	0	0	0	0	0
A0A669C625	Exostosin-1a	LOC100705583	Oreochromis niloticus (Nile tilapia) (Tilapia nilotica)	protein glycosylation [GO:0006486]	endoplasmic reticulum membrane [GO:0005789]	glucuronosyl-N-acetylglucosaminyl-proteoglycan 4-alpha-N-acetylglucosaminyltransferase activity [GO:0050508]; metal ion binding [GO:0046872]; N-acetylglucosaminyl-proteoglycan 4-beta-glucuronosyltransferase activity [GO:0050509]	GYLKYNTIPPYRK	0.97236	-1.5317	0	0	0	0	0	0	0	0	0	0	0	0	0	0	0	0	0	0	0	0	0	0	0	0	0	0	0	0	0	0	0	0	0	0	0	0	9.16164	0	0	0
A0A669C680	PICALM interacting mitotic regulator		Oreochromis niloticus (Nile tilapia) (Tilapia nilotica)				KLRSSSSLNSLR	0.93723	-0.95261	0	0	0	0	0	9.23012	0	0	0	0	0	0	0	0	0	0	0	0	0	0	0	0	0	0	0	0	0	0	0	0	0	0	0	0	0	0	0	0	0	0
A0A669C6C5	ANK_REP_REGION domain-containing protein		Oreochromis niloticus (Nile tilapia) (Tilapia nilotica)				ILVNWGQAK	0.95161	-1.2651	0	0	0	0	0	0	0	0	0	0	0	0	0	0	0	8.56636	0	0	0	0	0	0	0	0	0	0	0	0	0	0	0	0	0	0	0	0	0	0	0	0
A0A669C6C9	CTD small phosphatase-like protein 2-A	LOC100695025	Oreochromis niloticus (Nile tilapia) (Tilapia nilotica)			phosphoprotein phosphatase activity [GO:0004721]	THPSQAK	0.98255	-1.5892	0	0	0	0	0	0	0	0	0	0	0	0	0	0	0	0	0	0	0	0	0	0	0	0	0	0	0	0	0	0	0	0	0	0	0	0	0	0	0	0
A0A669C6G8	Transient receptor potential cation channel subfamily V member 4	trpv4	Oreochromis niloticus (Nile tilapia) (Tilapia nilotica)		membrane [GO:0016020]	ion channel activity [GO:0005216]	ALMNLYGR	0.99417	-3.3125	0	0	0	0	0	0	0	0	0	0	0	0	0	0	0	0	0	0	0	0	0	0	0	0	0	0	0	0	0	0	0	0	0	0	0	0	0	0	0	9.43883
A0A669C6K6	Heterogeneous nuclear ribonucleoprotein Q	LOC100696647	Oreochromis niloticus (Nile tilapia) (Tilapia nilotica)			RNA binding [GO:0003723]	LFVGSIPKSK	0.97331	-1.5332	0	0	0	0	0	0	0	0	0	0	0	0	0	0	0	0	0	0	0	0	0	0	0	0	0	0	0	0	0	0	0	0	0	0	0	0	0	0	11.5808	0
A0A669C6N3	Rho guanine nucleotide exchange factor 10-like protein	LOC100709217	Oreochromis niloticus (Nile tilapia) (Tilapia nilotica)			guanyl-nucleotide exchange factor activity [GO:0005085]	YAARNGTK	0.98549	-1.5941	0	0	0	0	0	0	0	0	0	0	0	0	0	0	0	0	0	0	0	0	0	0	0	0	0	0	0	0	0	0	0	0	0	0	0	0	8.73583	0	0	0
A0A669C6N4	Calcium channel, voltage-dependent, P/Q type, alpha 1A subunit, a		Oreochromis niloticus (Nile tilapia) (Tilapia nilotica)	regulation of ion transmembrane transport [GO:0034765]	voltage-gated calcium channel complex [GO:0005891]	metal ion binding [GO:0046872]; voltage-gated calcium channel activity [GO:0005245]	AVRVLRPLK	0.99715	-2.2882	0	0	0	0	0	0	0	0	0	0	0	0	0	0	0	0	0	0	0	0	0	9.28586	0	0	0	0	0	0	0	0	0	0	0	0	0	0	0	0	0	0
A0A669C6R6	Solute carrier family 12 member 2		Oreochromis niloticus (Nile tilapia) (Tilapia nilotica)	sodium ion transport [GO:0006814]	plasma membrane [GO:0005886]	cation:chloride symporter activity [GO:0015377]	DDEDDGK	0.98766	-1.5073	0	0	0	9.71982	9.92437	9.9104	0	0	0	0	0	0	0	0	0	0	0	0	0	0	0	0	0	0	0	0	0	0	0	0	0	0	0	0	0	0	0	0	0	0
A0A669C6V4	A-kinase anchoring protein 9	AKAP9	Oreochromis niloticus (Nile tilapia) (Tilapia nilotica)	signal transduction [GO:0007165]	cytoplasm [GO:0005737]; microtubule organizing center [GO:0005815]	molecular adaptor activity [GO:0060090]	SYMERNEK	0.99442	-3.8771	0	0	0	0	0	0	0	0	0	0	0	0	0	0	0	0	0	0	0	0	0	0	0	0	0	0	0	0	0	0	0	0	0	0	11.2922	0	0	0	0	0
A0A669C6W9	Protocadherin-7	LOC100709358	Oreochromis niloticus (Nile tilapia) (Tilapia nilotica)	homophilic cell adhesion via plasma membrane adhesion molecules [GO:0007156]	plasma membrane [GO:0005886]	calcium ion binding [GO:0005509]	QRHGSDPPR	0.99591	-2.1644	0	0	0	0	0	0	0	0	0	0	0	0	0	0	0	0	0	0	0	0	0	0	0	0	0	0	0	0	0	0	0	0	0	0	0	0	0	0	0	0
A0A669C6Z7	non-specific serine/threonine protein kinase (EC 2.7.11.1)	pdpk1	Oreochromis niloticus (Nile tilapia) (Tilapia nilotica)	protein phosphorylation [GO:0006468]	cytoplasm [GO:0005737]	ATP binding [GO:0005524]; protein serine/threonine kinase activity [GO:0004674]	TQYVKRER	0.9378	-0.95296	0	0	0	0	0	0	0	0	0	10.8802	9.41124	0	0	0	0	0	0	0	0	0	0	0	0	0	0	0	0	0	0	0	0	0	0	0	0	0	0	0	0	0
A0A669C787	NEDD4 family-interacting protein 1	NDFIP1	Oreochromis niloticus (Nile tilapia) (Tilapia nilotica)	metal ion transport [GO:0030001]; vacuolar transport [GO:0007034]	cytoplasm [GO:0005737]; membrane [GO:0016020]		VTEEDFVAR	0.95203	-1.4252	0	0	0	0	0	0	0	0	0	0	0	0	0	0	0	0	0	0	0	0	0	0	0	0	0	0	0	0	0	0	0	0	0	0	0	0	0	0	0	0
A0A669C788	Staufen double-stranded RNA binding protein 1	stau1	Oreochromis niloticus (Nile tilapia) (Tilapia nilotica)			RNA binding [GO:0003723]	GRTRQLAK	0.99596	-2.6982	0	0	0	0	0	9.8119	0	0	0	0	0	0	0	0	0	0	0	0	0	0	0	0	0	0	0	0	0	0	0	0	0	0	0	0	0	0	0	0	0	0
A0A669C7A4	Gastric inhibitory polypeptide (Glucose-dependent insulinotropic polypeptide)		Oreochromis niloticus (Nile tilapia) (Tilapia nilotica)	regulation of fatty acid biosynthetic process [GO:0042304]; regulation of insulin secretion [GO:0050796]; response to glucose [GO:0009749]	extracellular region [GO:0005576]	hormone activity [GO:0005179]	NFIKFLLSQR	0.96834	-1.5135	0	0	0	0	0	0	0	0	0	0	0	0	0	0	0	0	0	0	0	0	0	0	0	0	0	0	0	0	0	0	0	0	0	0	0	0	0	0	9.86623	0
A0A669C7B7	SH2 domain-containing protein 1B	LOC100689879	Oreochromis niloticus (Nile tilapia) (Tilapia nilotica)				KNKDGAYLIR	0.9376	-0.90656	0	0	0	0	0	0	0	0	0	0	0	0	0	0	0	0	0	0	0	0	0	0	0	0	0	0	0	0	0	0	0	0	0	0	0	0	0	10.3073	0	0
A0A669C7G5	Tyrosine-protein phosphatase (EC 3.1.3.48)	ptpn4	Oreochromis niloticus (Nile tilapia) (Tilapia nilotica)	protein dephosphorylation [GO:0006470]	cytoplasm [GO:0005737]; cytoskeleton [GO:0005856]	cytoskeletal protein binding [GO:0008092]; protein tyrosine phosphatase activity [GO:0004725]	TNKSTVAL	0.97951	-1.5882	0	11.2143	11.2442	0	13.3833	13.3848	0	0	0	0	0	0	0	0	0	0	0	10.6841	9.42859	0	0	0	0	10.1012	0	0	9.88626	11.9379	0	11.697	12.1164	0	0	0	0	0	0	0	0	0
A0A669C7I0	HEPN domain-containing protein		Oreochromis niloticus (Nile tilapia) (Tilapia nilotica)				LVRNMTLR	0.99321	-3.2263	0	0	0	0	0	0	0	0	0	0	0	0	0	0	0	0	0	0	0	0	0	0	0	0	0	0	0	0	0	0	0	0	0	0	0	0	0	0	0	0
A0A669C7J9	C2H2-type domain-containing protein		Oreochromis niloticus (Nile tilapia) (Tilapia nilotica)				TFKSPRHLR	0.93656	-1.0042	0	0	0	0	0	0	0	0	0	0	0	0	0	0	0	0	0	0	0	0	0	0	0	0	0	0	0	0	0	0	0	0	0	0	0	0	0	0	0	0
A0A669C7N8	Disintegrin and metalloproteinase domain-containing protein 12	LOC100703495	Oreochromis niloticus (Nile tilapia) (Tilapia nilotica)	anatomical structure development [GO:0048856]; proteolysis [GO:0006508]	membrane [GO:0016020]	metal ion binding [GO:0046872]; metalloendopeptidase activity [GO:0004222]	LVEIANYVDK	0.94063	-0.75569	0	0	0	10.0079	9.76112	9.51665	9.62996	9.57073	0	0	8.76311	0	0	0	0	0	0	0	0	0	0	0	0	0	0	0	0	0	0	0	0	0	0	0	0	0	0	0	0	0
A0A669C7Y0	Pseudopodium enriched atypical kinase 1	peak1	Oreochromis niloticus (Nile tilapia) (Tilapia nilotica)	protein phosphorylation [GO:0006468]		ATP binding [GO:0005524]; protein kinase activity [GO:0004672]	LLLTVNPSER	0.95193	-1.4314	0	0	0	0	0	0	0	0	0	0	0	0	0	0	0	0	0	0	0	0	0	0	0	0	0	0	0	0	0	0	0	9.01784	0	0	0	0	0	0	0	0
A0A669C806	Tumor protein p53-inducible protein 11 (p53-induced gene 11 protein)	tp53i11	Oreochromis niloticus (Nile tilapia) (Tilapia nilotica)		membrane [GO:0016020]		ASKPPAPLMK	0.9539	-1.4413	0	0	0	9.625	0	0	0	0	0	0	0	0	0	0	0	0	0	0	0	0	0	0	0	0	0	0	0	0	0	0	0	0	0	0	0	0	0	0	0	0
A0A669C840	Anoctamin	ANO1	Oreochromis niloticus (Nile tilapia) (Tilapia nilotica)		membrane [GO:0016020]	protein dimerization activity [GO:0046983]	IEKLTFQDR	0.98157	-1.6512	0	0	0	0	0	0	0	0	0	0	0	0	0	0	0	0	0	0	0	0	0	0	0	0	0	0	0	0	0	0	0	0	0	0	0	0	10.9329	0	0	0
A0A669C850	HTH_Tnp_Tc3_2 domain-containing protein		Oreochromis niloticus (Nile tilapia) (Tilapia nilotica)	DNA integration [GO:0015074]; transposition, DNA-mediated [GO:0006313]		DNA binding [GO:0003677]	ISQAFNIPR	0.99485	-2.7256	0	0	0	0	0	10.2971	0	0	0	0	0	0	0	0	0	0	0	0	0	0	0	0	0	0	0	0	0	0	0	0	0	0	0	0	0	0	0	0	0	0
A0A669C859	Protein Wnt	wnt1	Oreochromis niloticus (Nile tilapia) (Tilapia nilotica)	animal organ development [GO:0048513]; Wnt signaling pathway [GO:0016055]	extracellular region [GO:0005576]	signaling receptor binding [GO:0005102]	TGTLGTSGR	0.95988	-1.5066	0	0	0	0	0	0	0	0	0	0	0	0	0	0	0	0	0	0	0	0	0	0	9.29368	0	0	0	0	0	0	0	0	0	10.8409	0	0	0	0	0	0	0
A0A669C876	Inositol 1,4,5-trisphosphate receptor	ITPR3	Oreochromis niloticus (Nile tilapia) (Tilapia nilotica)		endoplasmic reticulum membrane [GO:0005789]	inositol 1,4,5 trisphosphate binding [GO:0070679]; inositol 1,4,5-trisphosphate-sensitive calcium-release channel activity [GO:0005220]	LALFINLIIDVAPK	0.97772	-1.566	0	0	0	0	0	0	0	0	0	0	0	0	0	0	0	0	0	0	0	0	0	0	0	0	0	0	0	0	0	0	0	0	0	0	10.7228	0	0	0	0	0
A0A669C8H5	Serine active site containing 1		Oreochromis niloticus (Nile tilapia) (Tilapia nilotica)				RLSTLIK	0.98587	-1.767	0	0	0	0	0	0	0	0	0	0	0	0	0	0	0	0	0	0	0	0	0	0	0	0	10.6671	0	0	0	0	0	0	0	0	0	0	0	0	0	0	0
A0A669C8Q4	Ribosome biogenesis protein BRX1 homolog (Brix domain-containing protein 2)		Oreochromis niloticus (Nile tilapia) (Tilapia nilotica)	rRNA processing [GO:0006364]	nucleolus [GO:0005730]	rRNA binding [GO:0019843]	EKLPGRSISGK	0.94212	-0.8877	0	0	0	0	0	0	0	0	0	0	0	0	0	0	0	0	0	0	0	0	0	0	0	0	0	0	0	0	0	0	0	0	0	0	0	8.96301	0	0	0	0
A0A669C8Q8	Anoctamin	LOC100697197	Oreochromis niloticus (Nile tilapia) (Tilapia nilotica)		membrane [GO:0016020]	protein dimerization activity [GO:0046983]	ENENSKHTAV	0.99327	-3.3902	9.20415	0	0	0	0	0	0	0	0	0	0	0	0	0	0	0	0	0	0	0	0	0	0	0	0	0	0	0	0	0	0	0	0	0	0	0	0	0	0	0
A0A669C8U8	Uncharacterized LOC102076942	LOC102076942	Oreochromis niloticus (Nile tilapia) (Tilapia nilotica)				QRPGATNR	0.95742	-1.4714	0	0	0	0	0	0	0	0	0	0	0	0	0	0	0	9.71265	0	0	0	0	0	0	0	0	0	0	0	0	0	0	0	0	0	0	0	0	0	0	0	0
A0A669C8X4	Lymphoid restricted membrane protein	lrmp	Oreochromis niloticus (Nile tilapia) (Tilapia nilotica)		cytoplasm [GO:0005737]; membrane [GO:0016020]		AVEVMIQHVENLR	0.99925	-4.2922	0	0	0	0	0	0	0	0	0	0	0	0	0	0	10.0849	0	0	0	0	0	0	0	0	0	0	0	0	0	0	0	0	0	0	0	0	0	0	0	0	0
A0A669C8Z6	Protein Wnt		Oreochromis niloticus (Nile tilapia) (Tilapia nilotica)	animal organ development [GO:0048513]; Wnt signaling pathway [GO:0016055]	extracellular region [GO:0005576]	signaling receptor binding [GO:0005102]	NGKLGGR	0.98318	-1.6243	0	0	0	0	0	0	0	0	0	0	0	0	0	0	0	0	0	0	0	0	0	0	0	0	0	0	0	0	0	0	0	0	0	0	0	0	0	0	0	0
A0A669C946	Sulfotransferase (EC 2.8.2.-)	LOC100693845	Oreochromis niloticus (Nile tilapia) (Tilapia nilotica)			sulfotransferase activity [GO:0008146]	LCNQKRGR	0.93719	-0.94641	0	0	0	0	0	0	0	0	0	0	9.18359	0	0	0	0	0	0	0	0	0	0	0	0	0	0	0	0	0	0	0	0	0	0	0	9.61254	0	0	0	0	0
A0A669C996	Valine--tRNA ligase (EC 6.1.1.9) (Valyl-tRNA synthetase)		Oreochromis niloticus (Nile tilapia) (Tilapia nilotica)	valyl-tRNA aminoacylation [GO:0006438]		aminoacyl-tRNA editing activity [GO:0002161]; ATP binding [GO:0005524]; valine-tRNA ligase activity [GO:0004832]	TNAAQLK	0.98961	-1.5073	0	0	0	0	0	0	0	11.9037	0	12.7179	0	11.7352	10.6911	0	0	0	11.2744	0	0	0	0	0	0	0	0	0	0	0	11.7277	0	0	0	11.7489	11.2336	0	0	0	0	0	0
A0A669C9E9	PiggyBac transposable element-derived protein domain-containing protein		Oreochromis niloticus (Nile tilapia) (Tilapia nilotica)		membrane [GO:0016020]		YYSVQQK	0.99034	-1.5073	0	0	0	0	0	0	9.26754	0	0	0	0	0	0	0	0	0	0	0	0	0	0	0	0	0	0	0	0	0	0	0	0	0	0	0	0	0	0	0	0	0
A0A669C9G4	Mediator of RNA polymerase II transcription subunit 24 (Mediator complex subunit 24)	med24	Oreochromis niloticus (Nile tilapia) (Tilapia nilotica)		mediator complex [GO:0016592]		GQDFMEDVNIAFQYLLK	0.92231	-0.57839	0	0	0	0	0	0	0	0	0	9.09658	0	0	0	0	0	0	0	0	0	0	0	0	0	0	0	0	0	0	0	0	0	0	0	0	0	0	0	0	0	0
A0A669C9H0	Integrin beta		Oreochromis niloticus (Nile tilapia) (Tilapia nilotica)	cell adhesion [GO:0007155]; integrin-mediated signaling pathway [GO:0007229]	anchoring junction [GO:0070161]; membrane [GO:0016020]		VLVSVHDQK	0.94879	-1.2784	0	0	0	9.50042	9.5336	0	0	0	0	0	0	0	0	0	0	0	0	0	0	0	0	0	0	0	0	0	0	0	0	0	0	0	0	0	0	0	0	0	0	0
A0A669C9I4	Serine/threonine-protein kinase TOR (EC 2.7.11.1)	mtor	Oreochromis niloticus (Nile tilapia) (Tilapia nilotica)	positive regulation of protein metabolic process [GO:0051247]; protein phosphorylation [GO:0006468]; regulation of nucleobase-containing compound metabolic process [GO:0019219]; response to chemical [GO:0042221]	TORC1 complex [GO:0031931]	ATP binding [GO:0005524]; protein serine/threonine kinase activity [GO:0004674]; protein-containing complex binding [GO:0044877]	ALHYKELEFQK	0.99377	-3.5926	0	0	0	0	0	0	0	0	0	0	0	0	0	0	0	0	0	0	0	0	0	0	0	0	0	0	0	0	0	0	0	0	0	0	0	0	0	0	9.62755	0
A0A669C9L1	ATP-binding cassette, sub-family B (MDR/TAP), member 7		Oreochromis niloticus (Nile tilapia) (Tilapia nilotica)		membrane [GO:0016020]	ABC-type transporter activity [GO:0140359]; ATP binding [GO:0005524]; ATP hydrolysis activity [GO:0016887]	ALMLAPLK	0.95428	-1.4439	0	0	0	0	0	0	0	0	0	10.1645	0	9.66784	0	0	0	0	0	0	0	0	0	10.7536	10.3208	0	0	0	0	0	9.49735	9.3845	0	0	0	0	10.4502	0	0	0	0	0
A0A669C9Z0	Coiled-coil domain containing 47	ccdc47	Oreochromis niloticus (Nile tilapia) (Tilapia nilotica)	endoplasmic reticulum calcium ion homeostasis [GO:0032469]	rough endoplasmic reticulum membrane [GO:0030867]	calcium ion binding [GO:0005509]	MMRPACDQVQVK	0.95852	-1.4532	0	0	0	0	0	0	0	0	0	0	0	0	0	0	0	0	0	0	0	0	0	0	0	0	0	0	0	0	0	0	0	0	0	0	0	0	0	0	0	0
A0A669CA08	proline--tRNA ligase (EC 6.1.1.15)	eprs1	Oreochromis niloticus (Nile tilapia) (Tilapia nilotica)	prolyl-tRNA aminoacylation [GO:0006433]	aminoacyl-tRNA synthetase multienzyme complex [GO:0017101]; cytoplasm [GO:0005737]	ATP binding [GO:0005524]; proline-tRNA ligase activity [GO:0004827]	GVPIRLEVGPK	0.984	-1.6231	0	0	0	0	0	0	0	0	0	0	0	0	0	0	0	0	0	0	0	0	0	0	0	0	0	0	0	0	0	0	0	0	0	0	0	0	0	0	0	0
A0A669CAG5	UDP-glucuronosyltransferase (EC 2.4.1.17)	LOC112841656	Oreochromis niloticus (Nile tilapia) (Tilapia nilotica)		membrane [GO:0016020]	glucuronosyltransferase activity [GO:0015020]	SEVVMKKLK	0.93493	-1.0042	0	0	0	0	0	0	0	0	0	0	0	0	0	0	0	0	0	0	0	0	0	0	0	0	0	0	0	0	9.87781	0	0	0	0	0	0	0	0	0	0	0
A0A669CAL0	DnaJ (Hsp40) homolog, subfamily C, member 3b		Oreochromis niloticus (Nile tilapia) (Tilapia nilotica)				ECFSHYK	0.99836	-2.4913	0	11.245	0	0	0	0	0	0	0	0	0	0	0	0	0	0	0	10.4755	0	0	10.4174	0	0	0	0	0	10.6475	0	0	0	0	0	0	0	9.29379	0	0	0	0	0
A0A669CAN5	C-type lectin domain-containing protein		Oreochromis niloticus (Nile tilapia) (Tilapia nilotica)				IKCGALK	0.99343	-3.4099	0	0	0	0	0	0	0	0	0	0	0	0	0	0	0	0	0	0	0	0	0	0	0	0	0	0	0	0	0	0	0	0	0	0	0	0	0	0	0	0
A0A669CAX2	WW and C2 domain containing 1		Oreochromis niloticus (Nile tilapia) (Tilapia nilotica)				ELKTQLEKAR	0.99653	-4.05	0	0	0	10.437	0	0	0	0	0	0	0	0	0	0	0	0	0	0	0	0	0	0	0	0	0	0	0	0	0	0	0	0	0	0	0	0	0	0	0	0
A0A669CB01	Ankyrin repeat domain 33Bb		Oreochromis niloticus (Nile tilapia) (Tilapia nilotica)				LAELKRLGPER	0.93808	-0.90387	0	0	0	0	0	0	0	0	0	0	0	0	0	0	0	0	0	0	0	0	0	0	0	0	0	0	0	0	0	0	0	0	0	0	0	0	11.7248	0	0	0
A0A669CB03	Palmitoyltransferase (EC 2.3.1.225)	LOC100700131	Oreochromis niloticus (Nile tilapia) (Tilapia nilotica)		cytoplasmic vesicle membrane [GO:0030659]; Golgi membrane [GO:0000139]	protein-cysteine S-palmitoyltransferase activity [GO:0019706]	ILCTSCMIK	0.97138	-1.5309	0	0	0	0	0	0	0	0	0	0	0	0	0	0	0	0	0	0	0	0	0	0	0	0	0	0	0	0	0	0	0	0	0	0	0	0	0	0	0	0
A0A669CB11	Neuralized E3 ubiquitin protein ligase 2	neurl2	Oreochromis niloticus (Nile tilapia) (Tilapia nilotica)	intracellular signal transduction [GO:0035556]; protein ubiquitination [GO:0016567]	cytoplasm [GO:0005737]		HYCNPTSDSE	0.96196	-1.504	0	0	0	10.506	10.5369	0	0	0	0	0	0	0	0	0	0	0	0	0	0	0	0	0	0	0	0	0	0	0	0	0	0	0	0	0	0	0	0	0	0	0
A0A669CB99	YLP motif containing 1	ylpm1	Oreochromis niloticus (Nile tilapia) (Tilapia nilotica)		nucleus [GO:0005634]		GGPLMMR	0.99206	-1.5073	0	0	0	0	0	0	0	0	0	0	0	0	0	0	0	0	0	0	0	0	0	0	0	0	0	0	0	0	0	11.8249	0	0	0	0	0	0	0	0	0	0
A0A669CBD6	Adhesion G-protein coupled receptor G1	LOC100705549	Oreochromis niloticus (Nile tilapia) (Tilapia nilotica)	cell surface receptor signaling pathway [GO:0007166]	membrane [GO:0016020]	G protein-coupled receptor activity [GO:0004930]	IMTGIKQLK	0.97774	-1.5678	0	0	0	0	0	0	0	0	10.4757	0	0	0	0	9.39015	0	0	0	0	0	0	0	0	0	0	0	0	0	0	0	0	0	0	0	0	0	0	0	0	0	0
A0A669CBV9	protein-tyrosine-phosphatase (EC 3.1.3.48)	LOC100711602	Oreochromis niloticus (Nile tilapia) (Tilapia nilotica)	protein dephosphorylation [GO:0006470]	membrane [GO:0016020]	protein tyrosine phosphatase activity [GO:0004725]	VGSIREQER	0.98268	-1.6444	0	0	0	0	0	0	0	0	0	0	0	0	0	0	0	0	0	0	0	0	0	0	0	0	0	0	0	0	0	0	0	0	0	0	0	0	0	0	0	0
A0A669CBX6	non-specific protein-tyrosine kinase (EC 2.7.10.2)	jak1	Oreochromis niloticus (Nile tilapia) (Tilapia nilotica)	intracellular signal transduction [GO:0035556]	cytoskeleton [GO:0005856]; membrane [GO:0016020]	ATP binding [GO:0005524]; non-membrane spanning protein tyrosine kinase activity [GO:0004715]	VVLKVLGSGHR	0.98341	-1.6354	0	0	0	0	0	0	0	0	0	0	0	0	13.0585	0	0	0	0	0	0	0	0	0	0	0	0	0	0	0	0	0	0	0	0	0	0	0	0	0	0	0
A0A669CBY1	Adhesion G protein-coupled receptor L2	adgrl2	Oreochromis niloticus (Nile tilapia) (Tilapia nilotica)	cell surface receptor signaling pathway [GO:0007166]	plasma membrane [GO:0005886]	carbohydrate binding [GO:0030246]; G protein-coupled receptor activity [GO:0004930]	AALPFGLVR	0.99335	-3.8291	0	0	0	0	0	0	11.921	0	0	0	0	0	0	0	0	0	0	0	0	0	0	0	0	0	0	0	0	0	0	0	0	0	0	0	0	0	0	0	0	0
A0A669CBZ9	Protein phosphatase 2, regulatory subunit A, beta a		Oreochromis niloticus (Nile tilapia) (Tilapia nilotica)				DKAVESLRK	0.94038	-0.93152	0	0	0	0	0	0	0	0	0	0	0	0	0	0	0	0	0	0	0	0	0	0	0	0	0	0	0	0	0	0	0	0	0	0	0	0	9.61705	0	0	0
A0A669CC23	Protein kinase domain-containing protein		Oreochromis niloticus (Nile tilapia) (Tilapia nilotica)	protein phosphorylation [GO:0006468]		ATP binding [GO:0005524]; protein kinase activity [GO:0004672]	TYMAKFVK	0.97818	-1.5867	0	0	0	0	12.5106	0	0	0	0	0	0	0	0	0	0	0	0	0	0	0	0	0	0	0	0	0	0	0	0	0	0	0	0	0	0	10.3778	0	0	0	0
A0A669CC34	Proteasomal ubiquitin receptor ADRM1	LOC100701093	Oreochromis niloticus (Nile tilapia) (Tilapia nilotica)		cytoplasm [GO:0005737]; nucleus [GO:0005634]; proteasome complex [GO:0000502]		DDEYCRK	0.95473	-1.2495	12.0634	0	0	0	0	0	0	0	0	0	0	0	0	0	0	0	0	0	0	0	0	0	0	0	0	0	0	0	0	0	0	0	0	0	0	0	0	0	0	0
A0A669CC56	G-protein coupled receptors family 1 profile domain-containing protein		Oreochromis niloticus (Nile tilapia) (Tilapia nilotica)		membrane [GO:0016020]	G protein-coupled receptor activity [GO:0004930]; olfactory receptor activity [GO:0004984]	KTKVNLK	0.93091	-0.98403	0	0	0	0	0	0	0	0	0	0	0	0	0	0	0	0	0	0	0	0	0	0	0	0	0	0	0	0	0	0	0	0	0	0	0	0	0	0	0	0
A0A669CC77	Beta-1,4 N-acetylgalactosaminyltransferase	LOC100705425	Oreochromis niloticus (Nile tilapia) (Tilapia nilotica)	cellular nitrogen compound metabolic process [GO:0034641]; lipid glycosylation [GO:0030259]	Golgi membrane [GO:0000139]	hexosyltransferase activity [GO:0016758]	IILPWSK	0.9901	-1.5073	0	0	0	0	0	0	0	0	0	0	0	0	0	0	0	0	0	0	0	0	0	0	0	0	0	0	0	0	9.49735	0	0	0	0	0	0	0	0	0	0	0
A0A669CCC3	RNA helicase (EC 3.6.4.13)	ddx27	Oreochromis niloticus (Nile tilapia) (Tilapia nilotica)			ATP binding [GO:0005524]; hydrolase activity [GO:0016787]; nucleic acid binding [GO:0003676]; RNA helicase activity [GO:0003724]	EERELAASEAK	0.9929	-3.2193	0	0	0	0	0	0	0	0	0	0	0	0	0	0	0	0	0	0	0	0	0	0	0	0	0	0	10.4734	0	0	0	0	0	0	0	0	0	0	0	0	0
A0A669CCD5	General transcription factor IIE subunit 2	gtf2e2	Oreochromis niloticus (Nile tilapia) (Tilapia nilotica)	transcription initiation at RNA polymerase II promoter [GO:0006367]	transcription factor TFIIE complex [GO:0005673]		IVNYMKTR	0.97895	-1.5621	0	0	0	0	0	0	0	0	0	0	0	0	0	0	0	0	0	0	0	0	0	0	0	0	0	0	0	0	0	0	0	0	0	0	0	0	0	0	0	0
A0A669CCG0	C-C motif chemokine	LOC100704474	Oreochromis niloticus (Nile tilapia) (Tilapia nilotica)	immune response [GO:0006955]	extracellular space [GO:0005615]	chemokine activity [GO:0008009]	SRSVCVDASASWTQR	0.97843	-1.5876	0	0	0	0	0	0	0	0	0	0	0	0	0	0	0	0	0	0	0	0	0	0	0	0	0	0	0	0	0	0	0	0	0	0	0	0	0	0	0	0
A0A669CCL0	Alsin	LOC100694505	Oreochromis niloticus (Nile tilapia) (Tilapia nilotica)			guanyl-nucleotide exchange factor activity [GO:0005085]	SLTGEEVIK	0.95392	-1.2534	0	0	0	0	0	10.3316	0	0	0	0	0	0	0	0	0	0	0	0	0	0	0	0	0	0	0	0	0	0	0	0	0	0	0	0	0	0	0	0	0	0
A0A669CCL5	Neuropilin (NRP) and tolloid (TLL)-like 2b		Oreochromis niloticus (Nile tilapia) (Tilapia nilotica)		membrane [GO:0016020]		GSMELPK	0.98986	-1.5073	0	0	0	0	0	0	0	0	0	0	0	0	0	0	0	0	0	0	0	0	0	0	0	0	0	0	0	0	11.8253	0	0	0	0	0	0	0	0	0	0	0
A0A669CCQ1	Mitogen-activated protein kinase kinase kinase kinase 4	map4k4	Oreochromis niloticus (Nile tilapia) (Tilapia nilotica)	protein phosphorylation [GO:0006468]	cytoplasm [GO:0005737]	ATP binding [GO:0005524]; protein kinase activity [GO:0004672]	TTSRSPVLSRR	0.93843	-0.89936	0	0	0	10.0429	0	0	0	0	0	0	0	0	0	0	0	0	0	0	0	0	0	0	0	0	0	0	0	0	0	0	0	0	0	0	0	0	0	0	0	0
A0A669CCY4	Cdk5 and Abl enzyme substrate 1	cables1	Oreochromis niloticus (Nile tilapia) (Tilapia nilotica)	cell division [GO:0051301]; regulation of cell cycle [GO:0051726]			LTLSKIR	0.98327	-1.6243	0	0	0	0	0	11.4995	0	0	0	0	0	0	0	0	0	0	0	0	0	0	0	0	0	0	0	0	0	0	0	0	0	0	0	0	0	0	0	0	0	0
A0A669CD01	Prefoldin subunit 6	pfdn6	Oreochromis niloticus (Nile tilapia) (Tilapia nilotica)	protein folding [GO:0006457]	prefoldin complex [GO:0016272]	unfolded protein binding [GO:0051082]	AQGLAVGKV	0.91482	-0.66982	0	0	0	0	0	0	0	0	0	0	0	0	0	0	0	0	0	0	0	0	0	0	0	0	0	0	0	0	0	0	0	0	0	0	0	0	0	0	0	0
A0A669CD39	Ryanodine receptor 3		Oreochromis niloticus (Nile tilapia) (Tilapia nilotica)	cellular calcium ion homeostasis [GO:0006874]	sarcoplasmic reticulum membrane [GO:0033017]	calmodulin binding [GO:0005516]; ryanodine-sensitive calcium-release channel activity [GO:0005219]	EVWLERAFK	0.99336	-3.2312	0	0	0	0	8.50279	8.55359	0	8.4219	8.54882	0	0	0	0	0	0	0	0	0	0	0	0	0	0	0	0	0	0	0	0	0	0	0	0	0	0	0	0	0	0	0
A0A669CD44	Reverse transcriptase domain-containing protein		Oreochromis niloticus (Nile tilapia) (Tilapia nilotica)			catalytic activity [GO:0003824]	FWREICEDLSKCLK	0.98871	-1.9081	0	0	0	0	0	0	0	0	0	0	0	0	0	0	0	0	0	0	0	0	0	0	0	0	0	0	0	0	0	0	0	0	0	0	0	0	0	0	0	0
A0A669CD47	Hephaestin-like protein 1	LOC100702360	Oreochromis niloticus (Nile tilapia) (Tilapia nilotica)			copper ion binding [GO:0005507]; oxidoreductase activity [GO:0016491]	IGSIYKKAVFR	0.93856	-0.90387	0	0	0	11.0692	11.1428	0	0	0	0	0	0	0	0	0	0	0	0	0	0	0	0	0	0	0	0	0	0	0	0	0	0	0	0	0	0	0	0	0	0	0
A0A669CD82	Homeobox domain-containing protein		Oreochromis niloticus (Nile tilapia) (Tilapia nilotica)	regulation of DNA-templated transcription [GO:0006355]	nucleus [GO:0005634]	DNA binding [GO:0003677]	ALESHSSSSFSSR	0.97216	-1.5221	0	0	10.5658	0	0	0	0	0	0	0	0	0	0	0	0	0	0	0	8.78323	0	0	0	0	0	0	0	0	0	0	0	0	8.64609	0	0	0	0	0	0	0	0
A0A669CDC5	Dipeptidyl peptidase 9	LOC100694249	Oreochromis niloticus (Nile tilapia) (Tilapia nilotica)	proteolysis [GO:0006508]		serine-type peptidase activity [GO:0008236]	RQQNLQLVLLPPELFIPAHQDEAK	0.93019	-0.62386	0	0	0	0	0	0	0	0	0	0	0	0	0	0	0	0	0	0	0	0	0	0	0	0	0	0	0	0	0	0	0	0	0	0	0	0	0	0	0	0
A0A669CDJ9	Dystonin	DST	Oreochromis niloticus (Nile tilapia) (Tilapia nilotica)	intermediate filament cytoskeleton organization [GO:0045104]	cell projection [GO:0042995]; cytoplasm [GO:0005737]; microtubule [GO:0005874]; plasma membrane [GO:0005886]	actin binding [GO:0003779]; calcium ion binding [GO:0005509]; microtubule binding [GO:0008017]	GRMRFHR	0.99319	-3.7248	0	0	0	0	0	0	0	0	0	0	0	13.1944	0	0	0	0	13.176	0	0	0	0	0	0	0	12.055	0	0	0	0	0	0	0	0	0	0	0	0	0	0	12.5381
A0A669CDK9	6-phosphofructokinase (EC 2.7.1.11) (Phosphohexokinase)		Oreochromis niloticus (Nile tilapia) (Tilapia nilotica)	fructose 6-phosphate metabolic process [GO:0006002]	cytoplasm [GO:0005737]	6-phosphofructokinase activity [GO:0003872]; ATP binding [GO:0005524]; metal ion binding [GO:0046872]	RLGYDTR	0.98644	-1.767	0	0	0	0	0	0	0	10.9543	0	0	0	0	0	0	0	0	0	0	0	0	0	0	0	0	0	0	0	0	0	0	0	0	0	0	0	0	0	0	0	0
A0A669CDN5	Zinc finger protein 260-like	LOC106099054	Oreochromis niloticus (Nile tilapia) (Tilapia nilotica)				EFHANEKQYSCSTCGKR	0.99222	-3.1086	0	0	0	0	0	0	0	0	0	0	0	0	0	0	0	0	0	0	0	0	0	0	0	0	0	0	0	0	0	0	0	0	0	0	0	0	0	0	0	0
A0A669CDP1	Furry homolog b (Drosophila)		Oreochromis niloticus (Nile tilapia) (Tilapia nilotica)	cell morphogenesis [GO:0000902]			LTSITTTLFPK	0.99694	-2.1807	0	0	0	9.0281	0	0	0	0	0	0	0	0	0	0	0	0	0	0	0	0	0	0	0	0	0	0	0	0	0	0	0	0	0	0	0	0	0	0	10.2367	0
A0A669CDQ4	Sorting nexin-27	LOC100707918	Oreochromis niloticus (Nile tilapia) (Tilapia nilotica)	intracellular protein transport [GO:0006886]; signal transduction [GO:0007165]; vesicle-mediated transport [GO:0016192]	endosome [GO:0005768]; membrane [GO:0016020]	phosphatidylinositol-3-phosphate binding [GO:0032266]	GFIKTEDK	0.9952	-2.8003	0	0	0	0	0	0	0	0	0	0	0	0	0	0	0	0	0	0	0	0	0	0	0	0	0	0	0	10.5485	0	0	0	0	0	0	0	0	0	0	0	0
A0A669CDV7	Alpha-1A adrenergic receptor	LOC100708890	Oreochromis niloticus (Nile tilapia) (Tilapia nilotica)		plasma membrane [GO:0005886]	adrenergic receptor activity [GO:0004935]	TCCCILRAR	0.9842	-1.6226	0	0	0	0	0	0	0	0	0	0	0	0	0	0	0	0	0	0	0	0	0	0	0	0	0	0	9.00501	0	0	0	0	0	0	0	0	0	0	0	0	0
A0A669CDW4	Fibrillin 1	FBN1	Oreochromis niloticus (Nile tilapia) (Tilapia nilotica)	animal organ development [GO:0048513]	extracellular matrix [GO:0031012]	calcium ion binding [GO:0005509]	TLTGGNQCIVPICR	0.96464	-1.5097	0	0	0	0	0	0	0	0	0	0	0	0	0	0	0	0	0	0	0	0	0	0	0	0	0	0	0	0	0	0	0	0	0	0	0	0	0	0	0	0
A0A669CEJ1	Leucine rich repeat containing 18b		Oreochromis niloticus (Nile tilapia) (Tilapia nilotica)				VLNLCNNR	0.95453	-1.4597	0	0	0	0	0	0	0	0	0	0	0	0	0	0	0	0	0	0	0	0	0	0	0	0	0	0	8.62249	0	0	0	0	0	0	0	0	0	0	0	0	0
A0A669CEP8	Troponin I type 1b (skeletal, slow)		Oreochromis niloticus (Nile tilapia) (Tilapia nilotica)		troponin complex [GO:0005861]		HKVSLDLRANLK	0.95641	-1.4583	0	0	0	0	0	0	0	0	0	0	0	0	0	0	0	0	0	0	0	0	0	0	0	0	0	0	0	0	0	0	0	0	11.858	0	0	0	0	0	0	0
A0A669CER5	NACHT domain-containing protein		Oreochromis niloticus (Nile tilapia) (Tilapia nilotica)		cytosol [GO:0005829]		SVKQKLK	0.93478	-0.98403	0	0	0	0	0	0	0	0	0	0	0	0	0	0	0	0	0	0	0	0	0	0	0	10.5202	0	0	0	0	0	0	0	0	0	0	0	0	0	0	0	0
A0A669CEW9	Cytoplasmic FMR1 interacting protein 1		Oreochromis niloticus (Nile tilapia) (Tilapia nilotica)	regulation of actin filament polymerization [GO:0030833]		small GTPase binding [GO:0031267]	LCHTERRK	0.93768	-0.95262	0	0	0	0	0	9.14231	0	0	0	0	0	0	0	0	0	0	0	0	0	0	0	0	0	0	0	0	0	0	0	0	0	0	0	0	0	0	0	0	0	0
A0A669CEX9	Myosin regulatory light polypeptide 9	LOC100697131	Oreochromis niloticus (Nile tilapia) (Tilapia nilotica)			calcium ion binding [GO:0005509]	LNGTDPEDVIR	0	19.172	0	0	0	0	0	0	0	0	0	0	0	0	0	0	0	0	0	0	0	0	0	0	0	0	0	0	0	0	0	0	0	0	0	0	0	0	0	0	0	0
A0A669CF08	Vav 3 guanine nucleotide exchange factor b		Oreochromis niloticus (Nile tilapia) (Tilapia nilotica)	cell surface receptor signaling pathway [GO:0007166]; intracellular signal transduction [GO:0035556]		guanyl-nucleotide exchange factor activity [GO:0005085]; metal ion binding [GO:0046872]	RNVGLPR	0.95474	-1.2497	0	0	0	14.5061	14.3498	14.3508	0	0	12.3371	0	0	12.9934	11.6178	11.4343	11.3197	12.3546	12.3976	0	0	0	10.8104	0	11.3985	0	0	11.23	0	13.3911	13.153	13.2459	13.5445	0	13.3187	12.7689	12.7086	12.6986	12.6533	0	12.7233	0
A0A669CF14	Mitogen-activated protein kinase 8 interacting protein 3		Oreochromis niloticus (Nile tilapia) (Tilapia nilotica)		cytoplasm [GO:0005737]	MAP-kinase scaffold activity [GO:0005078]	VDQQMFESLHR	0.94923	-1.2845	0	0	0	0	0	0	0	0	0	0	0	0	0	0	0	0	0	0	0	0	0	0	0	0	0	0	0	0	0	0	0	0	0	0	0	0	0	0	0	0
A0A669CF23	Rho GTPase-activating protein 21	LOC100711250	Oreochromis niloticus (Nile tilapia) (Tilapia nilotica)	signal transduction [GO:0007165]			GGEDADDER	0.99317	-3.1487	0	0	0	0	0	0	0	0	0	0	0	0	0	0	0	0	0	0	0	0	0	0	0	0	0	0	0	0	0	0	0	0	0	0	0	0	0	0	0	0
A0A669CF77	Protein FAM107B	LOC100700289	Oreochromis niloticus (Nile tilapia) (Tilapia nilotica)				CCAQDSGPPPSCYGGISCK	0.98942	-2.051	0	0	0	0	0	0	0	0	0	0	0	0	0	0	0	0	0	0	0	0	0	0	0	0	0	0	0	0	0	9.56146	0	0	0	0	0	0	0	0	0	0
A0A669CF83	Contactin-3	LOC100695819	Oreochromis niloticus (Nile tilapia) (Tilapia nilotica)		membrane [GO:0016020]		LITKEVIK	0.98462	-1.5932	11.7936	0	0	0	0	0	0	0	0	0	0	0	0	0	0	0	0	0	0	0	0	0	0	0	0	0	0	0	0	0	0	0	0	0	0	0	0	0	0	0
A0A669CFB3	Serine palmitoyltransferase long chain base subunit 2	sptlc2	Oreochromis niloticus (Nile tilapia) (Tilapia nilotica)	biosynthetic process [GO:0009058]	membrane [GO:0016020]	pyridoxal phosphate binding [GO:0030170]; transferase activity [GO:0016740]	FCVSAAHTR	0.9834	-1.6243	0	0	0	13.4367	0	0	0	0	0	0	0	0	0	0	0	0	0	0	0	0	0	0	0	0	0	0	0	0	0	0	11.5623	0	11.1747	0	0	11.1431	0	0	0	0
A0A669CFJ1	39S ribosomal protein L23, mitochondrial	LOC100697226	Oreochromis niloticus (Nile tilapia) (Tilapia nilotica)				ALWRRCR	0.93186	-0.98403	0	0	0	9.74995	0	0	0	0	0	0	0	0	0	0	0	0	0	0	0	0	0	0	0	0	0	0	0	0	0	0	0	0	0	0	0	0	0	0	0	0
A0A669CFK0	Uncharacterized LOC100700505	LOC100700505	Oreochromis niloticus (Nile tilapia) (Tilapia nilotica)	centriole replication [GO:0007099]; regulation of cytokinesis [GO:0032465]	centriole [GO:0005814]		KSQEYRR	0.93235	-0.98403	0	0	0	0	0	0	0	0	0	0	0	0	0	0	0	0	0	0	0	0	0	0	0	0	0	0	0	0	0	0	0	0	0	0	0	0	0	0	0	0
A0A669CFL1	Protocadherin-related 15a		Oreochromis niloticus (Nile tilapia) (Tilapia nilotica)	homophilic cell adhesion via plasma membrane adhesion molecules [GO:0007156]; inner ear development [GO:0048839]; sensory perception of sound [GO:0007605]	plasma membrane [GO:0005886]; stereocilium [GO:0032420]	calcium ion binding [GO:0005509]	RVFIEVRDENDHPPVFSR	0.93203	-0.58992	0	0	0	0	0	0	0	0	0	0	0	0	0	0	0	0	0	0	0	0	0	0	0	0	0	0	0	0	0	0	0	0	0	0	10.2955	0	0	0	0	0
A0A669CFQ2	Arginyl-tRNA--protein transferase 1 (Arginyltransferase 1) (R-transferase 1) (EC 2.3.2.8) (Arginine-tRNA--protein transferase 1)	ATE1	Oreochromis niloticus (Nile tilapia) (Tilapia nilotica)			arginyltransferase activity [GO:0004057]	LVRSNPPSPQFK	0.98597	-1.6038	0	0	0	9.40873	0	0	0	0	0	0	0	0	0	0	0	0	0	0	0	0	0	0	0	0	0	0	0	0	0	0	0	0	0	0	0	0	0	0	0	0
A0A669CFT3	Myosin-7	LOC100701355	Oreochromis niloticus (Nile tilapia) (Tilapia nilotica)	system development [GO:0048731]	myosin complex [GO:0016459]	actin filament binding [GO:0051015]; ATP binding [GO:0005524]; cytoskeletal motor activity [GO:0003774]	ANAEVAQWR	0.98862	-1.9828	0	0	0	0	0	0	0	0	0	0	0	0	0	0	0	0	0	0	0	0	0	0	0	0	0	0	0	0	0	0	0	0	0	0	9.44031	0	0	0	0	0
A0A669CFU1	Integrator complex subunit 8	ints8	Oreochromis niloticus (Nile tilapia) (Tilapia nilotica)	snRNA 3'-end processing [GO:0034472]	nucleus [GO:0005634]		LAGYWNACR	0.99738	-2.5627	0	9.26714	0	0	0	0	0	0	0	0	0	8.32012	0	0	0	8.63441	0	0	0	0	0	0	0	0	0	0	0	0	0	0	0	0	0	0	0	0	0	0	0	0
A0A669CFV6	ATP binding cassette subfamily F member 2	abcf2	Oreochromis niloticus (Nile tilapia) (Tilapia nilotica)			ATP binding [GO:0005524]; ATP hydrolysis activity [GO:0016887]	KHSHVKIGR	0.99801	-2.4127	0	0	0	0	0	0	0	0	0	0	0	0	0	0	0	0	0	0	0	0	0	0	0	0	0	9.70274	0	0	0	0	0	0	0	0	0	0	12.7842	0	0	0
A0A669CFY3	Ras-interacting protein 1	LOC100701657	Oreochromis niloticus (Nile tilapia) (Tilapia nilotica)				KPTIRER	0.9834	-1.6243	11.3386	0	11.1808	0	13.6087	0	0	11.49	11.3846	0	0	12.3091	0	0	0	0	0	0	0	0	0	0	0	0	0	0	0	0	0	0	0	12.945	0	0	0	11.9712	12.3825	12.3212	12.1854	0
A0A669CG13	Aurora kinase A interacting protein 1	aurkaip1	Oreochromis niloticus (Nile tilapia) (Tilapia nilotica)				NVLEIRR	0.94893	-1.2246	0	0	0	0	0	13.6374	0	0	0	0	0	0	0	0	0	0	0	0	0	0	0	0	0	0	0	0	0	0	0	0	13.0402	0	0	0	0	0	0	0	0	0
A0A669CG48	Uncharacterized protein		Oreochromis niloticus (Nile tilapia) (Tilapia nilotica)				GFVRRTIER	0.93739	-1.0042	0	0	0	0	0	0	0	0	0	0	0	0	0	0	0	0	0	0	0	0	0	0	0	0	0	0	0	0	0	0	0	0	0	0	0	0	0	0	0	0
A0A669CG76	Trafficking protein particle complex 8	trappc8	Oreochromis niloticus (Nile tilapia) (Tilapia nilotica)				TLATPLQR	0.95725	-1.3921	0	0	0	0	0	0	0	0	0	0	0	0	0	0	0	0	0	0	0	0	0	0	0	0	0	0	0	0	0	0	0	8.41316	0	0	0	0	0	0	0	0
A0A669CG83	Alpha-1,4 glucan phosphorylase (EC 2.4.1.1)		Oreochromis niloticus (Nile tilapia) (Tilapia nilotica)	glycogen metabolic process [GO:0005977]		glycogen phosphorylase activity [GO:0008184]; linear malto-oligosaccharide phosphorylase activity [GO:0102250]; pyridoxal phosphate binding [GO:0030170]; SHG alpha-glucan phosphorylase activity [GO:0102499]	DRNVATRR	0.96335	-1.4823	0	0	0	0	0	12.6192	0	0	0	0	0	0	0	0	0	0	0	0	0	0	0	0	0	0	0	0	0	0	0	0	0	0	0	0	0	0	0	0	0	0
A0A669CGE2	RING-type E3 ubiquitin transferase (EC 2.3.2.27)	rnf13	Oreochromis niloticus (Nile tilapia) (Tilapia nilotica)		endomembrane system [GO:0012505]; membrane [GO:0016020]	zinc ion binding [GO:0008270]	EDYMYDK	0.98912	-1.5073	0	0	0	9.53724	0	9.62244	0	0	0	0	0	0	0	0	0	0	0	0	0	0	0	0	0	0	0	0	0	0	0	0	0	0	0	0	0	0	0	0	0	0
A0A669CGK0	Cystatin-B	LOC100695024	Oreochromis niloticus (Nile tilapia) (Tilapia nilotica)		cytoplasm [GO:0005737]	cysteine-type endopeptidase inhibitor activity [GO:0004869]	NFEVFTAK	0	0.92868	0	0	0	0	0	0	0	0	0	0	0	0	0	0	0	0	0	0	0	0	0	0	0	0	0	0	0	0	0	0	0	0	0	0	0	0	0	0	0	0
A0A669CGS9	Tyrosine-protein kinase (EC 2.7.10.2)	fyn	Oreochromis niloticus (Nile tilapia) (Tilapia nilotica)			ATP binding [GO:0005524]; non-membrane spanning protein tyrosine kinase activity [GO:0004715]	LDFLANPPR	0.94849	-1.2785	0	0	0	0	8.87135	0	0	0	0	0	0	0	0	0	0	0	0	0	0	0	0	0	0	0	0	0	0	0	0	0	0	0	0	0	0	0	0	0	0	0
A0A669CGY2	Arf-GAP with SH3 domain, ANK repeat and PH domain-containing protein 1	LOC100691828	Oreochromis niloticus (Nile tilapia) (Tilapia nilotica)	positive regulation of GTPase activity [GO:0043547]	cytoplasm [GO:0005737]	GTPase activator activity [GO:0005096]; metal ion binding [GO:0046872]	AALYEEVK	0.95463	-1.4462	0	0	0	0	0	0	0	0	0	0	0	0	0	0	0	0	0	0	0	0	0	0	0	0	0	0	0	0	0	0	0	0	0	0	0	0	0	0	0	0
A0A669CH21	Annexin	ANXA2	Oreochromis niloticus (Nile tilapia) (Tilapia nilotica)	negative regulation of coagulation [GO:0050819]	basement membrane [GO:0005604]; extracellular region [GO:0005576]; membrane [GO:0016020]	calcium ion binding [GO:0005509]; calcium-dependent phospholipid binding [GO:0005544]	ITVTAFRLR	0.99609	-2.611	0	0	0	0	0	0	0	9.1316	0	0	0	0	0	0	0	0	0	0	0	0	0	0	0	0	0	0	0	0	0	0	0	0	0	0	0	0	0	0	0	0
A0A669CHF3	SPT20 homolog, SAGA complex component	supt20h	Oreochromis niloticus (Nile tilapia) (Tilapia nilotica)		SAGA complex [GO:0000124]	transcription coregulator activity [GO:0003712]	ISSGGRK	0.9373	-0.98417	0	0	0	0	0	0	0	0	9.13958	0	0	0	0	0	0	0	0	0	0	0	0	0	0	0	0	0	0	0	0	0	0	0	0	0	0	0	0	0	0	0
A0A669CHG1	C2H2-type domain-containing protein		Oreochromis niloticus (Nile tilapia) (Tilapia nilotica)		nucleus [GO:0005634]	DNA binding [GO:0003677]; metal ion binding [GO:0046872]	AFKAKYK	0.9316	-0.98403	0	0	0	0	0	0	0	0	0	0	0	0	0	0	0	0	0	0	0	0	0	0	0	0	0	0	0	0	0	0	0	0	0	0	0	0	0	12.5195	0	0
A0A669CHH4	GTPase IMAP family member 8	LOC100694118	Oreochromis niloticus (Nile tilapia) (Tilapia nilotica)			GTP binding [GO:0005525]	DKKQVPK	0.94381	-0.86948	0	0	0	0	0	0	0	0	0	0	0	0	0	0	0	0	0	0	0	0	0	0	0	0	0	0	0	0	0	0	0	0	0	0	0	0	0	0	0	0
A0A669CHL2	Heat shock protein family A (Hsp70) member 4 like	hspa4l	Oreochromis niloticus (Nile tilapia) (Tilapia nilotica)			ATP binding [GO:0005524]; ATP-dependent protein folding chaperone [GO:0140662]	WLYEDGEDQPK	0.94895	-1.3027	0	0	0	0	0	0	0	0	0	0	0	0	0	0	0	0	0	0	0	0	0	0	0	0	0	0	0	0	0	0	0	0	0	0	0	0	0	0	0	0
A0A669CHT0	Neuropilin	nrp1	Oreochromis niloticus (Nile tilapia) (Tilapia nilotica)	angiogenesis [GO:0001525]; axon guidance [GO:0007411]; regulation of plasma membrane bounded cell projection organization [GO:0120035]; regulation of response to external stimulus [GO:0032101]	membrane [GO:0016020]	heparin binding [GO:0008201]; metal ion binding [GO:0046872]; semaphorin receptor activity [GO:0017154]; vascular endothelial growth factor receptor activity [GO:0005021]	SPGFPEK	0.98767	-1.5073	12.1584	12.0738	0	0	0	0	0	0	0	13.1125	0	11.7299	0	0	0	0	0	0	0	10.2306	0	10.627	0	0	0	0	0	0	0	0	0	0	0	0	0	0	0	0	0	0
A0A669CHT3	Ribonucleoside-diphosphate reductase subunit M2 B	LOC100710041	Oreochromis niloticus (Nile tilapia) (Tilapia nilotica)	deoxyribonucleotide biosynthetic process [GO:0009263]	membrane [GO:0016020]	metal ion binding [GO:0046872]; oxidoreductase activity [GO:0016491]	MIQPNPR	0.98888	-1.5073	0	0	0	0	0	0	0	0	0	0	0	0	0	0	0	0	0	0	0	0	0	0	0	0	0	0	0	0	0	0	0	0	0	0	0	0	0	0	0	0
A0A669CHZ9	ATP-dependent DNA helicase (EC 3.6.4.12)		Oreochromis niloticus (Nile tilapia) (Tilapia nilotica)	DNA recombination [GO:0006310]; DNA repair [GO:0006281]; telomere maintenance [GO:0000723]		ATP binding [GO:0005524]; DNA helicase activity [GO:0003678]; hydrolase activity [GO:0016787]	MSGLPEK	0.98863	-1.5073	0	12.0738	0	0	0	13.6892	0	0	0	0	0	0	0	0	0	0	0	0	0	0	0	0	0	0	0	0	0	0	0	11.8249	0	0	0	0	0	0	0	0	0	0
A0A669CI15	Pentatricopeptide repeat domain 3	ptcd3	Oreochromis niloticus (Nile tilapia) (Tilapia nilotica)	mitochondrial translation [GO:0032543]; regulation of translation [GO:0006417]	mitochondrion [GO:0005739]; ribonucleoprotein complex [GO:1990904]; ribosome [GO:0005840]	ribosomal small subunit binding [GO:0043024]; rRNA binding [GO:0019843]	SLRRCGFLAK	0.93584	-0.98018	0	0	0	9.51863	0	0	0	0	0	0	0	0	0	0	0	0	0	0	0	0	0	0	0	0	0	0	0	0	0	0	0	0	0	0	0	0	0	0	0	0
A0A669CI64	Citron rho-interacting serine/threonine kinase b		Oreochromis niloticus (Nile tilapia) (Tilapia nilotica)	cell development [GO:0048468]	cellular anatomical entity [GO:0110165]	metal ion binding [GO:0046872]	LIDFLQAQAHGGSKK	0.98851	-2.0254	0	0	0	0	0	0	0	0	0	0	0	0	0	0	0	0	0	0	0	0	0	0	0	0	0	0	0	0	0	0	0	0	0	0	0	0	0	0	0	0
A0A669CI77	Signal peptide, CUB domain and EGF like domain containing 2	scube2	Oreochromis niloticus (Nile tilapia) (Tilapia nilotica)	animal organ development [GO:0048513]	extracellular region [GO:0005576]	calcium ion binding [GO:0005509]	TLRKSINR	0.93635	-0.94787	0	0	0	12.9257	0	0	0	0	0	0	0	0	0	0	0	0	0	0	0	0	0	0	0	0	0	0	0	0	0	0	0	0	0	0	0	11.7495	0	0	0	0
A0A669CIA7	Secreted protein		Oreochromis niloticus (Nile tilapia) (Tilapia nilotica)				AQRHMHER	0.98722	-1.7488	0	0	0	0	0	0	0	0	0	8.21616	0	0	0	0	0	0	0	0	0	0	0	0	0	0	0	0	0	0	0	0	0	0	0	0	0	0	0	0	0	0
A0A669CIF3	Rho GTPase-activating protein 29	LOC100690565	Oreochromis niloticus (Nile tilapia) (Tilapia nilotica)	cell development [GO:0048468]; signal transduction [GO:0007165]		metal ion binding [GO:0046872]	RLAMDIESAK	0.98751	-1.7579	0	0	0	0	0	0	0	0	0	0	0	0	0	0	0	0	0	0	0	0	0	0	0	0	0	0	0	0	0	0	0	0	0	0	0	0	9.13232	0	0	0
A0A669CIG1	RNA helicase (EC 3.6.4.13)		Oreochromis niloticus (Nile tilapia) (Tilapia nilotica)		nucleus [GO:0005634]	ATP binding [GO:0005524]; RNA binding [GO:0003723]; RNA helicase activity [GO:0003724]	KWLGEVKK	0.93945	-0.94692	0	0	0	0	0	0	0	0	0	0	0	0	0	0	0	0	0	0	0	0	0	0	0	0	0	0	0	0	0	0	0	0	13.0295	0	0	0	0	0	0	0
A0A669CII6	ribonuclease H (EC 3.1.26.4)		Oreochromis niloticus (Nile tilapia) (Tilapia nilotica)	DNA integration [GO:0015074]		metal ion binding [GO:0046872]; nucleic acid binding [GO:0003676]; RNA-DNA hybrid ribonuclease activity [GO:0004523]	DIFSFTYR	0.98839	-1.5073	0	0	0	0	0	0	0	0	0	0	0	0	0	0	0	0	0	0	0	0	0	0	0	0	0	0	0	0	0	0	0	0	0	0	0	0	0	0	0	0
A0A669CIP3	protein kinase C (EC 2.7.11.13)		Oreochromis niloticus (Nile tilapia) (Tilapia nilotica)	cell development [GO:0048468]; protein phosphorylation [GO:0006468]	cytoplasm [GO:0005737]; membrane [GO:0016020]	ATP binding [GO:0005524]; calcium-dependent protein kinase C activity [GO:0004698]; metal ion binding [GO:0046872]	EVACSIVDQK	0.92931	-1.0311	0	0	0	0	8.90201	0	0	0	0	0	0	0	0	0	0	0	0	0	0	0	0	0	0	0	0	0	0	0	0	0	0	0	0	0	0	0	0	0	0	0
A0A669CIR3	LEM domain containing 3	lemd3	Oreochromis niloticus (Nile tilapia) (Tilapia nilotica)		endomembrane system [GO:0012505]; membrane [GO:0016020]; nucleus [GO:0005634]	nucleic acid binding [GO:0003676]	FSTYSGLSQTYR	0.99391	-3.068	0	0	0	0	0	0	0	0	0	0	0	0	0	0	0	0	0	0	0	0	0	0	0	0	0	0	0	0	0	0	0	0	0	0	0	0	0	0	0	0
A0A669CIS1	Uncharacterized LOC106097715	LOC106097715	Oreochromis niloticus (Nile tilapia) (Tilapia nilotica)		membrane [GO:0016020]		GRPLFSVKHLK	0.97245	-1.5499	0	0	0	0	0	0	0	0	0	0	0	0	0	0	0	0	0	0	0	0	0	0	0	0	0	0	0	0	0	0	0	0	0	0	0	10.1591	0	0	0	0
A0A669CIT1	Bromodomain and WD repeat domain containing 1		Oreochromis niloticus (Nile tilapia) (Tilapia nilotica)				AKKPRPSINR	0.9396	-0.73594	0	0	0	0	0	0	0	0	0	0	0	0	0	0	0	0	0	0	0	0	0	0	0	0	0	0	0	0	0	0	0	0	0	0	0	0	0	0	0	0
A0A669CIT7	Uncharacterized LOC102079344	LOC102079344	Oreochromis niloticus (Nile tilapia) (Tilapia nilotica)				NCSTCQK	0.98815	-1.5073	0	0	0	0	0	0	0	0	0	0	0	0	0	0	0	0	0	0	0	0	0	0	0	0	0	0	0	0	0	0	0	0	0	0	0	0	0	0	0	0
A0A669CIU2	Reverse transcriptase domain-containing protein		Oreochromis niloticus (Nile tilapia) (Tilapia nilotica)				AFDTLQHFILISK	0.99817	-2.3827	0	0	0	0	0	0	0	0	0	8.70453	0	0	0	0	0	0	0	0	0	0	0	0	0	0	0	0	0	0	0	0	0	0	0	0	0	0	0	0	0	0
A0A669CIZ3	GTPase IMAP family member 8	LOC100691412	Oreochromis niloticus (Nile tilapia) (Tilapia nilotica)		membrane [GO:0016020]	GTP binding [GO:0005525]	ILQQMFGVHLGGYTMALFTR	0.90705	-0.55394	0	0	0	0	0	9.9993	0	0	0	0	0	0	0	0	0	0	0	0	0	0	0	0	0	0	0	0	0	0	0	0	0	0	0	0	0	0	0	0	0	0
A0A669CJ37	Twinfilin-2	LOC100709494	Oreochromis niloticus (Nile tilapia) (Tilapia nilotica)	negative regulation of actin filament polymerization [GO:0030837]	cytoskeleton [GO:0005856]	actin binding [GO:0003779]	ITEDERRR	0.99679	-2.2247	0	0	0	0	0	0	0	0	0	0	0	0	0	0	0	0	8.88328	0	0	0	0	0	0	0	0	0	0	0	0	0	0	0	0	0	0	0	0	0	0	0
A0A669CJ41	Reverse transcriptase domain-containing protein		Oreochromis niloticus (Nile tilapia) (Tilapia nilotica)				HVAHMDPR	0.95003	-1.3111	0	0	0	0	0	0	0	8.88655	8.65796	0	0	0	0	0	0	0	0	0	0	0	0	0	0	0	0	0	0	0	0	0	0	0	0	0	0	0	0	0	0	0
A0A669CJ51	LARGE xylosyl- and glucuronyltransferase 2	LOC100690862	Oreochromis niloticus (Nile tilapia) (Tilapia nilotica)	cellular macromolecule biosynthetic process [GO:0034645]; primary metabolic process [GO:0044238]		UDP-glycosyltransferase activity [GO:0008194]	SEQCYTEVSDLK	0.95816	-1.4691	0	0	0	0	0	0	0	0	0	0	0	0	0	0	0	0	0	0	0	0	0	0	0	0	0	0	0	0	0	0	0	0	0	0	0	0	0	0	0	0
A0A669CJ76	Calcium/calmodulin-dependent protein kinase type 1	LOC100704700	Oreochromis niloticus (Nile tilapia) (Tilapia nilotica)	protein phosphorylation [GO:0006468]	cytoplasm [GO:0005737]	ATP binding [GO:0005524]; protein kinase activity [GO:0004672]	DFICHLMEK	0.98982	-1.9594	0	0	0	0	0	0	0	0	0	0	0	0	0	0	0	0	0	0	0	0	0	0	0	0	0	0	0	0	0	0	0	0	0	0	0	0	0	0	0	0
A0A669CJC5	ATP binding cassette subfamily A member 5	ABCA5	Oreochromis niloticus (Nile tilapia) (Tilapia nilotica)		membrane [GO:0016020]	ABC-type transporter activity [GO:0140359]; ATP binding [GO:0005524]; ATP hydrolysis activity [GO:0016887]	QHVPKAKLSR	0.9367	-0.90815	0	0	0	10.779	0	0	0	0	0	0	0	0	0	0	0	0	0	0	0	0	0	0	0	0	0	0	0	0	0	0	0	0	0	0	0	0	0	0	0	0
A0A669CJE1	Golgin A3	golga3	Oreochromis niloticus (Nile tilapia) (Tilapia nilotica)				KVKQLFVCK	0.93416	-1.0076	0	0	0	0	0	0	0	0	0	0	0	0	0	0	0	0	0	0	0	0	0	0	0	0	0	0	0	0	0	0	0	0	0	0	0	0	0	0	0	0
A0A669CJG4	Protocadherin Fat 4	LOC102080140	Oreochromis niloticus (Nile tilapia) (Tilapia nilotica)	anatomical structure development [GO:0048856]	membrane [GO:0016020]		GQRAYIMLK	0.99363	-3.1381	0	0	0	0	0	0	0	0	0	0	0	0	0	0	0	0	0	0	0	0	0	0	0	0	0	9.14075	0	0	0	0	0	0	0	0	0	0	0	0	0	0
A0A669CJH0	Microtubule associated tumor suppressor 1b		Oreochromis niloticus (Nile tilapia) (Tilapia nilotica)		nucleus [GO:0005634]		DELVVSSQCCER	0.99452	-3.048	0	0	0	0	0	0	0	0	0	0	0	0	0	0	0	0	0	0	0	0	0	0	0	0	0	0	0	0	0	0	0	0	0	0	0	0	0	0	9.93275	0
A0A669CJH2	Rap guanine nucleotide exchange factor 2	rapgef2	Oreochromis niloticus (Nile tilapia) (Tilapia nilotica)	cell differentiation [GO:0030154]; proteolysis [GO:0006508]; small GTPase mediated signal transduction [GO:0007264]	anchoring junction [GO:0070161]; late endosome [GO:0005770]; perinuclear region of cytoplasm [GO:0048471]	GTPase activator activity [GO:0005096]; guanyl-nucleotide exchange factor activity [GO:0005085]; metalloendopeptidase activity [GO:0004222]	NGAPHLPK	0.98889	-2.0443	0	0	0	0	0	0	0	0	0	0	0	0	0	0	0	0	0	0	0	0	0	10.0926	0	0	0	0	0	0	0	0	0	0	0	0	0	0	0	11.1989	0	0
A0A669CJI5	Sphingolipid transporter 2	SPNS2	Oreochromis niloticus (Nile tilapia) (Tilapia nilotica)		membrane [GO:0016020]	transmembrane transporter activity [GO:0022857]	CQQWCQLGGPR	0.81839	-0.52931	0	0	0	0	0	9.01377	0	0	0	0	0	0	0	0	0	0	0	0	0	0	0	0	0	0	0	0	0	0	0	0	0	0	0	0	0	0	0	0	0	0
A0A669CJK3	Synaptic vesicle glycoprotein 2A	LOC100702979	Oreochromis niloticus (Nile tilapia) (Tilapia nilotica)		membrane [GO:0016020]	transmembrane transporter activity [GO:0022857]	YRLINCK	0.98298	-1.6243	0	0	0	0	0	0	0	0	0	0	0	0	0	0	0	0	0	0	0	0	0	0	0	0	0	0	0	0	0	0	0	0	0	0	0	0	0	0	0	0
A0A669CJL8	RFNG O-fucosylpeptide 3-beta-N-acetylglucosaminyltransferase		Oreochromis niloticus (Nile tilapia) (Tilapia nilotica)		membrane [GO:0016020]	glycosyltransferase activity [GO:0016757]	KEITAGLNR	0.94544	-1.2085	0	0	0	0	0	0	0	0	0	0	0	0	0	0	0	0	0	0	0	0	0	0	0	0	0	0	0	0	0	0	0	0	0	0	0	0	0	0	8.94764	0
A0A669CJN2	Peptidase, mitochondrial processing beta subunit	pmpcb	Oreochromis niloticus (Nile tilapia) (Tilapia nilotica)	proteolysis [GO:0006508]	mitochondrial matrix [GO:0005759]	metal ion binding [GO:0046872]; metalloendopeptidase activity [GO:0004222]	FTAGPYR	0.99354	-1.5073	0	0	0	0	0	0	0	0	0	0	0	0	0	0	0	0	0	0	0	0	0	0	0	0	0	0	0	0	0	0	0	0	0	0	0	0	0	0	0	0
A0A669CJR6	SET binding protein 1	setbp1	Oreochromis niloticus (Nile tilapia) (Tilapia nilotica)			DNA binding [GO:0003677]	LDKAERADK	0.93648	-0.72573	0	0	0	0	0	0	0	0	0	0	0	0	0	0	0	0	0	0	0	0	0	0	0	0	0	14.4435	0	0	0	0	0	0	0	0	0	0	0	0	0	0
A0A669CJS8	Nuclear receptor ROR-alpha	LOC100700925	Oreochromis niloticus (Nile tilapia) (Tilapia nilotica)		nucleus [GO:0005634]	nuclear receptor activity [GO:0004879]; sequence-specific DNA binding [GO:0043565]; zinc ion binding [GO:0008270]	EEIQTYQSK	0.94012	-0.75574	9.81788	0	9.42561	0	0	0	0	10.2253	10.1297	0	0	0	0	0	0	9.27864	0	0	0	0	0	0	0	0	9.98968	0	0	0	0	0	0	0	0	0	0	0	0	0	0	0
A0A669CK10	C2H2-type domain-containing protein		Oreochromis niloticus (Nile tilapia) (Tilapia nilotica)				HCLNWHGK	0.9939	-3.0603	0	0	0	0	0	0	0	0	0	0	0	0	0	0	0	0	0	0	0	0	0	0	0	0	0	0	0	0	0	0	0	0	0	0	0	0	0	0	0	0
A0A669CK52	Matrix metalloproteinase-17	LOC100702797	Oreochromis niloticus (Nile tilapia) (Tilapia nilotica)	proteolysis [GO:0006508]	extracellular matrix [GO:0031012]	metalloendopeptidase activity [GO:0004222]; zinc ion binding [GO:0008270]	MALVLHK	1.0043	-1.5073	12.1793	0	0	0	0	0	0	12.3591	0	14.568	13.0367	12.9934	0	0	0	0	0	12.1782	0	0	0	11.6495	0	11.5931	11.0488	0	11.303	0	0	0	0	0	0	0	0	0	0	12.6317	0	12.0948
A0A669CKB6	Adaptor related protein complex 3 subunit beta 2	AP3B2	Oreochromis niloticus (Nile tilapia) (Tilapia nilotica)	intracellular protein transport [GO:0006886]; vesicle-mediated transport [GO:0016192]	AP-3 adaptor complex [GO:0030123]; clathrin-coated vesicle membrane [GO:0030665]		KMAKSFTNEEDIVK	0.98711	-1.8827	0	0	0	0	0	0	0	0	0	0	0	0	0	0	0	0	0	0	0	0	0	0	0	0	0	0	0	0	0	0	0	0	0	0	0	0	0	0	0	0
A0A669CKC7	Tetraspanin	TSPAN7	Oreochromis niloticus (Nile tilapia) (Tilapia nilotica)		membrane [GO:0016020]		HEIKGTFR	0.99852	-2.5185	9.4941	0	0	0	0	0	0	0	0	0	0	0	0	0	0	0	0	0	0	0	0	0	0	0	0	0	0	0	0	0	0	0	0	0	0	0	0	0	11.0394	9.85985
A0A669CKG3	Tyrosine-protein kinase receptor (EC 2.7.10.1)	ntrk3	Oreochromis niloticus (Nile tilapia) (Tilapia nilotica)	transmembrane receptor protein tyrosine kinase signaling pathway [GO:0007169]	plasma membrane [GO:0005886]	ATP binding [GO:0005524]; transmembrane receptor protein tyrosine kinase activity [GO:0004714]	DLWFHSIR	0.95848	-1.4523	0	0	0	0	0	0	0	0	0	0	0	0	0	0	0	0	0	0	0	0	0	9.91821	0	0	0	0	0	0	0	0	0	0	0	0	0	0	0	0	0	0
A0A669CKI1	Glycerophosphodiester phosphodiesterase domain containing 2	gdpd2	Oreochromis niloticus (Nile tilapia) (Tilapia nilotica)	lipid metabolic process [GO:0006629]		phosphoric diester hydrolase activity [GO:0008081]	NISDLRKR	0.93664	-0.94641	0	0	0	0	0	0	0	0	0	0	0	0	0	0	0	0	0	0	0	0	0	0	0	0	0	0	0	0	0	0	0	0	0	0	0	0	9.07178	0	0	0
A0A669CKJ2	ribonuclease H (EC 3.1.26.4)		Oreochromis niloticus (Nile tilapia) (Tilapia nilotica)	DNA integration [GO:0015074]		nucleic acid binding [GO:0003676]	MPNPADDTGHIR	0.99353	-3.2657	0	0	0	0	0	0	0	0	0	0	0	0	0	0	0	0	0	0	0	0	0	0	0	0	0	0	0	0	0	0	0	0	0	0	0	0	0	0	9.1558	0
A0A669CKJ7	Small G protein signaling modulator 2	sgsm2	Oreochromis niloticus (Nile tilapia) (Tilapia nilotica)		cytoplasmic vesicle [GO:0031410]	GTPase activator activity [GO:0005096]	MLCQNMKR	0.98428	-1.7356	0	0	0	0	0	0	0	0	0	0	0	0	0	0	0	0	0	0	0	0	0	0	0	0	0	0	0	0	0	0	0	0	0	0	0	0	0	0	0	0
A0A669CKP3	Leucine rich repeat containing 23		Oreochromis niloticus (Nile tilapia) (Tilapia nilotica)		membrane [GO:0016020]		LERLTTLHLR	0.98355	-1.6205	0	0	0	0	0	0	0	0	0	0	0	0	0	0	0	0	0	0	0	0	0	0	0	0	0	0	0	0	0	0	0	0	0	0	0	0	0	0	0	0
A0A669CKR1	RNA binding motif protein 19		Oreochromis niloticus (Nile tilapia) (Tilapia nilotica)			RNA binding [GO:0003723]	ETDRNFSR	0.98621	-1.5923	0	0	0	0	9.16526	0	0	0	0	0	0	0	0	0	0	0	0	0	0	0	0	0	0	0	0	0	0	0	0	0	0	0	0	0	0	0	0	0	0	0
A0A669CLA3	Phospholipid-transporting ATPase (EC 7.6.2.1)	atp10a	Oreochromis niloticus (Nile tilapia) (Tilapia nilotica)	phospholipid transport [GO:0015914]	membrane [GO:0016020]	ATP binding [GO:0005524]; ATP hydrolysis activity [GO:0016887]; ATPase-coupled intramembrane lipid transporter activity [GO:0140326]; magnesium ion binding [GO:0000287]	LGLVIDGR	0.98852	-2.0309	0	0	0	0	0	0	0	0	0	0	0	0	0	0	0	0	0	0	0	0	0	0	0	0	0	0	0	0	0	0	0	0	0	0	0	0	0	0	0	0
A0A669CLA9	Early endosome antigen 1		Oreochromis niloticus (Nile tilapia) (Tilapia nilotica)				QLLIQQK	1.0089	-1.5073	0	0	0	0	0	0	0	0	0	0	0	11.6393	0	0	0	0	0	0	0	0	0	0	0	0	0	0	0	0	0	0	0	0	0	0	0	0	0	0	0	0
A0A669CLG8	Protein Wnt	wnt9a	Oreochromis niloticus (Nile tilapia) (Tilapia nilotica)	animal organ development [GO:0048513]; Wnt signaling pathway [GO:0016055]	extracellular region [GO:0005576]	signaling receptor binding [GO:0005102]	EEVYTCKG	0.98448	-1.7356	0	0	0	0	0	0	0	0	0	0	0	0	0	0	0	0	0	0	0	0	0	0	10.0389	0	0	0	0	0	0	0	0	0	0	0	0	0	0	0	0	0
A0A669CLR7	Transmembrane channel-like protein	TMC2	Oreochromis niloticus (Nile tilapia) (Tilapia nilotica)		plasma membrane [GO:0005886]		GPGPGRGRGR	0.93527	-0.90815	0	0	0	0	0	0	0	0	11.2595	0	0	0	0	0	0	0	0	0	0	0	0	0	0	0	0	0	0	0	0	0	0	0	0	0	0	0	0	0	0	0
A0A669CLU4	Importin subunit alpha	kpna4	Oreochromis niloticus (Nile tilapia) (Tilapia nilotica)	protein import into nucleus [GO:0006606]	cytoplasm [GO:0005737]	nuclear import signal receptor activity [GO:0061608]	ADNEKLDNQR	0.95589	-1.3683	0	0	0	0	0	0	0	0	0	0	0	0	0	0	0	0	0	0	0	0	0	0	0	0	0	0	0	0	0	0	0	0	0	0	0	0	0	0	0	0
A0A669CLY0	Protein phosphatase 1 regulatory subunit 12B	LOC100701156	Oreochromis niloticus (Nile tilapia) (Tilapia nilotica)			protein kinase binding [GO:0019901]	FRCGYQP	0.98233	-1.6243	0	0	0	0	0	0	0	0	0	0	0	0	0	0	0	0	0	0	0	0	0	0	0	0	0	0	0	0	0	0	0	0	0	0	0	0	0	0	0	0
A0A669CLZ8	High density lipoprotein binding protein b		Oreochromis niloticus (Nile tilapia) (Tilapia nilotica)			RNA binding [GO:0003723]	AIYEDKAK	0.99289	-3.7128	0	0	0	0	0	0	0	0	0	0	0	8.93254	0	0	0	0	0	0	0	0	0	0	0	0	0	0	0	0	0	0	0	0	9.48043	9.88739	0	0	0	0	0	0
A0A669CM34	SLIT-ROBO Rho GTPase activating protein 2	srgap2	Oreochromis niloticus (Nile tilapia) (Tilapia nilotica)	nervous system development [GO:0007399]; signal transduction [GO:0007165]			EAEKQEEKQMGR	0.9436	-0.86167	0	0	0	0	0	0	0	0	0	0	0	0	0	0	0	0	0	0	0	0	0	0	0	0	0	0	0	0	0	0	0	0	0	0	0	0	0	0	0	0
A0A669CM64	Vitamin D3 receptor A	LOC100696631	Oreochromis niloticus (Nile tilapia) (Tilapia nilotica)		cytoplasm [GO:0005737]; nucleus [GO:0005634]	nuclear receptor activity [GO:0004879]; sequence-specific DNA binding [GO:0043565]; zinc ion binding [GO:0008270]	AGHTLELLEPLVK	0.95765	-1.4712	0	0	0	0	0	0	0	0	0	10.037	0	0	0	0	0	0	0	0	10.0353	0	0	0	0	0	0	0	0	0	0	0	0	0	0	0	0	0	0	0	0	0
A0A669CMA0	NACHT, LRR and PYD domains-containing protein 3-like	LOC109200664	Oreochromis niloticus (Nile tilapia) (Tilapia nilotica)				MMMEEEEER	0.99227	-2.1112	0	0	0	0	0	12.7851	0	0	0	0	0	0	0	0	0	0	0	0	0	0	0	0	0	0	0	0	0	0	0	0	0	0	0	0	0	0	0	0	0	0
A0A669CMC2	Olfactory receptor		Oreochromis niloticus (Nile tilapia) (Tilapia nilotica)		plasma membrane [GO:0005886]	G protein-coupled receptor activity [GO:0004930]; olfactory receptor activity [GO:0004984]	LKEISKHLQR	0.9441	-0.86127	0	0	0	0	0	9.91873	0	0	0	0	0	0	0	0	0	0	0	0	0	0	0	0	0	0	0	0	0	0	0	0	0	0	0	0	0	0	0	0	0	0
A0A669CMC6	Uncharacterized protein		Oreochromis niloticus (Nile tilapia) (Tilapia nilotica)		membrane [GO:0016020]		LSGTDRVAAR	0.94921	-1.154	0	0	0	0	0	0	0	0	0	0	0	0	0	0	0	0	0	0	0	0	0	0	0	0	0	0	0	0	0	0	0	0	0	0	0	0	0	0	0	0
A0A669CMH4	DUF3421 domain-containing protein		Oreochromis niloticus (Nile tilapia) (Tilapia nilotica)				TNSFDILVNDK	0.38889	-0.41892	9.71467	0	0	0	0	0	9.92865	10.0039	9.91486	0	0	0	0	0	0	9.1009	0	0	0	0	0	0	0	0	0	0	0	0	0	0	0	0	0	0	0	0	0	0	0	0
A0A669CMJ9	Golgin A4	golga4	Oreochromis niloticus (Nile tilapia) (Tilapia nilotica)				KEEELQKK	0.9294	-1.0644	9.15213	9.32236	9.16151	9.73417	9.6689	0	10.3993	0	9.86127	0	0	0	0	0	0	0	0	0	0	0	0	0	0	0	0	0	0	10.0913	0	0	0	0	0	0	0	0	9.17248	9.12559	9.29914	0
A0A669CMK4	ArfGAP with GTPase domain, ankyrin repeat and PH domain 2		Oreochromis niloticus (Nile tilapia) (Tilapia nilotica)			GTP binding [GO:0005525]; GTPase activator activity [GO:0005096]; GTPase activity [GO:0003924]; metal ion binding [GO:0046872]	MWKLKSFGSLR	0.93956	-0.93421	0	0	0	0	0	0	0	0	0	0	0	0	0	0	0	0	0	0	0	0	0	0	0	0	0	0	0	0	0	0	0	0	0	0	0	0	0	0	0	0
A0A669CMN1	Reverse transcriptase domain-containing protein		Oreochromis niloticus (Nile tilapia) (Tilapia nilotica)				IWFDVNKLSLNLTK	0.98936	-2.0129	0	0	0	0	0	0	0	0	0	0	0	0	0	0	0	0	0	0	0	0	0	0	0	0	0	0	0	0	0	0	0	0	0	0	0	0	0	0	0	0
A0A669CMQ5	Neurexin-1a	LOC100697588	Oreochromis niloticus (Nile tilapia) (Tilapia nilotica)	anatomical structure development [GO:0048856]	membrane [GO:0016020]		LELDGARVR	0.95564	-1.388	0	0	0	0	0	0	0	0	0	0	0	0	0	0	0	8.56636	0	0	0	0	0	0	0	0	0	0	0	0	0	0	0	0	0	0	0	0	0	0	0	0
A0A669CN37	Multidrug resistance-associated protein 5	LOC100710139	Oreochromis niloticus (Nile tilapia) (Tilapia nilotica)		membrane [GO:0016020]	ABC-type transporter activity [GO:0140359]; ATP binding [GO:0005524]; ATP hydrolysis activity [GO:0016887]	GPKRPGR	0.98261	-1.6243	0	12.255	0	14.5202	14.5189	14.3565	0	12.6443	12.6315	13.7353	0	13.1237	11.9359	11.9628	0	12.7045	0	12.5929	11.2949	11.3201	0	0	11.773	0	11.5693	11.5092	0	13.3538	0	13.2038	13.3187	13.388	0	12.7253	0	12.7932	12.7107	12.7476	12.7447	12.4267
A0A669CN58	Si:ch211-241f5.3		Oreochromis niloticus (Nile tilapia) (Tilapia nilotica)	animal organ development [GO:0048513]; cell surface receptor signaling pathway [GO:0007166]	plasma membrane [GO:0005886]	calcium ion binding [GO:0005509]; G protein-coupled receptor activity [GO:0004930]	GNITLSTK	0.96231	-1.4738	0	0	0	0	0	0	0	0	0	0	0	0	0	0	0	0	0	0	0	0	0	0	0	0	0	0	0	0	0	0	0	0	0	0	0	0	0	0	0	0
A0A669CN68	1,4-alpha-glucan branching enzyme (EC 2.4.1.18)	gbe1	Oreochromis niloticus (Nile tilapia) (Tilapia nilotica)	glycogen biosynthetic process [GO:0005978]	cytoplasm [GO:0005737]	1,4-alpha-glucan branching enzyme activity [GO:0003844]; 1,4-alpha-glucan branching enzyme activity (using a glucosylated glycogenin as primer for glycogen synthesis) [GO:0102752]; cation binding [GO:0043169]; hydrolase activity, hydrolyzing O-glycosyl compounds [GO:0004553]	ISPWAKYVTK	0.99404	-3.034	0	0	0	0	0	0	0	0	0	8.44886	0	0	0	0	0	0	0	0	0	0	0	0	0	0	0	0	0	0	0	0	0	0	0	0	0	0	0	0	0	0
A0A669CNA1	60S ribosomal protein L8		Oreochromis niloticus (Nile tilapia) (Tilapia nilotica)	translation [GO:0006412]	ribonucleoprotein complex [GO:1990904]; ribosome [GO:0005840]	structural constituent of ribosome [GO:0003735]	AVVGVVAGGGR	0	4.8639	0	0	0	0	0	0	0	0	0	0	0	0	0	0	11.8619	0	12.6231	0	0	0	0	0	0	0	0	0	0	0	0	0	0	0	0	0	0	0	0	0	0	0
A0A669CNA9	Coiled-coil domain-containing protein 25	ccdc25	Oreochromis niloticus (Nile tilapia) (Tilapia nilotica)		endomembrane system [GO:0012505]; plasma membrane [GO:0005886]		LSSAHVYLR	0.93107	-0.9733	0	0	0	0	0	0	0	0	0	11.4592	9.48595	0	13.7955	0	0	0	14.8893	0	0	0	0	0	0	0	0	0	0	0	0	11.0832	0	0	0	0	12.9995	0	0	0	0	0
A0A669CNS3	General vesicular transport factor p115	uso1	Oreochromis niloticus (Nile tilapia) (Tilapia nilotica)	intracellular protein transport [GO:0006886]; vesicle fusion with Golgi apparatus [GO:0048280]	Golgi membrane [GO:0000139]		GNAAIQK	1.0008	-1.5073	0	11.3239	0	12.2771	0	0	0	0	0	0	0	0	0	10.5928	0	11.0806	0	0	0	10.0278	10.0408	0	0	0	10.0207	0	0	11.5661	0	0	0	11.6992	0	0	0	0	0	0	0	0
A0A669CNT8	Semaphorin 5A	sema5a	Oreochromis niloticus (Nile tilapia) (Tilapia nilotica)	cell development [GO:0048468]; neurogenesis [GO:0022008]; response to external stimulus [GO:0009605]	membrane [GO:0016020]	semaphorin receptor binding [GO:0030215]	CSYHKTCVGAR	0.96164	-1.4986	0	0	0	0	0	0	0	0	0	0	0	0	0	0	0	0	0	0	0	0	0	0	0	0	0	0	0	0	0	0	0	0	0	0	0	0	0	0	0	0
A0A669CNW0	MBD domain-containing protein		Oreochromis niloticus (Nile tilapia) (Tilapia nilotica)		nucleus [GO:0005634]	DNA binding [GO:0003677]	EEEDRGIFCPK	0.97884	-1.5768	0	0	0	0	0	0	0	0	0	0	0	0	0	0	0	0	0	0	0	0	0	0	0	0	0	0	0	0	0	0	0	0	0	0	0	0	0	0	0	0
A0A669CNX7	Squalene synthase (SQS) (SS) (EC 2.5.1.21)	fdft1	Oreochromis niloticus (Nile tilapia) (Tilapia nilotica)	lipid biosynthetic process [GO:0008610]		farnesyl-diphosphate farnesyltransferase activity [GO:0004310]; squalene synthase activity [GO:0051996]	EAWSQFAGR	0.95506	-1.3811	0	0	0	0	0	0	0	0	0	0	0	0	0	0	0	0	0	0	0	0	0	0	0	0	0	0	0	0	0	0	0	0	0	0	0	0	0	0	0	0
A0A669CP03	Rho GTPase-activating protein 6	ARHGAP6	Oreochromis niloticus (Nile tilapia) (Tilapia nilotica)	signal transduction [GO:0007165]			MGDSVFFDR	0.97143	-1.5274	0	0	0	0	0	0	0	0	0	0	0	0	0	0	0	0	0	0	0	0	0	0	0	0	0	0	0	0	0	0	0	0	0	0	0	0	0	0	0	0
A0A669CP08	Rho GTPase-activating protein 17	LOC100704392	Oreochromis niloticus (Nile tilapia) (Tilapia nilotica)	signal transduction [GO:0007165]	cytoplasm [GO:0005737]		LYTGNGQK	0.95795	-1.4714	0	0	0	0	0	0	0	0	0	0	0	0	0	0	0	0	0	0	0	0	0	0	0	0	0	0	0	0	0	0	0	0	0	0	0	0	0	0	0	0
A0A669CP29	Lysine demethylase 2A	kdm2a	Oreochromis niloticus (Nile tilapia) (Tilapia nilotica)	chromatin organization [GO:0006325]; histone H3-K36 demethylation [GO:0070544]	nucleus [GO:0005634]	dioxygenase activity [GO:0051213]; DNA binding [GO:0003677]; zinc ion binding [GO:0008270]	FGGPGRMK	0.99571	-2.9037	0	0	0	0	0	0	0	0	0	0	0	0	0	0	0	0	0	0	0	0	0	0	0	0	0	0	0	0	0	0	0	0	0	0	0	0	0	0	0	0
A0A669CP45	ribonuclease H (EC 3.1.26.4)		Oreochromis niloticus (Nile tilapia) (Tilapia nilotica)	DNA integration [GO:0015074]		nucleic acid binding [GO:0003676]	RDVEDFCR	0.99521	-2.8329	0	0	0	0	0	0	0	0	0	0	0	0	9.90572	0	0	0	0	0	0	0	0	0	0	0	0	0	0	0	0	0	0	0	0	0	0	0	0	0	0	0
A0A669CPD1	CD36 molecule	cd36	Oreochromis niloticus (Nile tilapia) (Tilapia nilotica)	cell adhesion [GO:0007155]; lipid transport [GO:0006869]	apical plasma membrane [GO:0016324]; Golgi apparatus [GO:0005794]; membrane raft [GO:0045121]		ASSEYELINSLSCR	0.97834	-1.5638	0	0	0	0	0	0	0	0	0	0	0	0	0	0	0	0	0	0	0	0	0	0	0	0	0	0	0	0	0	0	0	0	0	0	0	0	0	0	0	0
A0A669CPE5	Queuine tRNA-ribosyltransferase catalytic subunit 1 (EC 2.4.2.64) (Guanine insertion enzyme) (tRNA-guanine transglycosylase)	QTRT1	Oreochromis niloticus (Nile tilapia) (Tilapia nilotica)	tRNA-guanine transglycosylation [GO:0101030]	mitochondrial outer membrane [GO:0005741]	metal ion binding [GO:0046872]; queuine tRNA-ribosyltransferase activity [GO:0008479]	ALSPLSLR	0.95661	-1.3907	12.7288	0	0	0	11.345	0	0	0	0	0	0	0	0	0	0	0	0	0	0	0	0	0	0	0	0	0	0	0	0	0	0	0	0	0	0	0	0	0	0	0
A0A669CPF1	Perforin-1	LOC100694155	Oreochromis niloticus (Nile tilapia) (Tilapia nilotica)	cytolysis [GO:0019835]	extracellular region [GO:0005576]		LEVEKYIKK	0.93436	-0.97699	0	0	0	0	0	0	0	0	0	0	0	0	0	0	0	0	0	0	0	0	0	0	0	0	0	0	0	0	0	0	0	0	0	0	0	0	13.1562	0	0	0
A0A669CPF9	Uncharacterized protein		Oreochromis niloticus (Nile tilapia) (Tilapia nilotica)				MKEIEEK	0.98251	-1.6243	0	0	0	0	0	0	0	0	0	0	0	0	0	0	9.71739	0	0	0	0	0	0	0	0	0	0	0	0	0	0	0	0	0	0	0	0	0	0	0	0	0
A0A669CPQ6	Kinesin-like protein		Oreochromis niloticus (Nile tilapia) (Tilapia nilotica)	microtubule-based movement [GO:0007018]; system development [GO:0048731]	microtubule [GO:0005874]	ATP binding [GO:0005524]; microtubule binding [GO:0008017]; microtubule motor activity [GO:0003777]	VFCCCRK	0.95599	-1.2495	0	0	0	0	0	0	0	0	0	0	0	0	0	0	0	0	0	0	0	0	0	0	0	0	0	0	0	0	0	10.4244	0	0	0	0	0	0	0	0	0	0
A0A669CPU2	Reverse transcriptase domain-containing protein		Oreochromis niloticus (Nile tilapia) (Tilapia nilotica)				AVRRECR	0.93355	-0.98403	0	0	0	0	0	0	0	0	0	0	0	0	0	0	0	0	0	0	0	0	0	0	0	0	0	0	0	0	0	0	0	0	0	0	0	0	0	0	0	0
A0A669CQ16	Lysine--tRNA ligase (Lysyl-tRNA synthetase)	kars1	Oreochromis niloticus (Nile tilapia) (Tilapia nilotica)	lysyl-tRNA aminoacylation [GO:0006430]	cytoplasm [GO:0005737]	ATP binding [GO:0005524]; lysine-tRNA ligase activity [GO:0004824]; nucleic acid binding [GO:0003676]	GNPGKTK	0.98287	-1.6243	0	0	11.2611	12.2771	12.5553	12.0308	11.466	0	0	11.5305	0	11.1735	10.5637	10.5928	10.5486	11.0806	10.9922	0	0	10.0278	0	0	10.2635	0	0	10.0879	0	11.5661	0	11.4041	11.6428	11.6992	11.5332	10.8156	0	10.9817	0	0	11.0097	0
A0A669CQ61	Oculocutaneous albinism II		Oreochromis niloticus (Nile tilapia) (Tilapia nilotica)	transmembrane transport [GO:0055085]	membrane [GO:0016020]		LKKAQEHR	0.93756	-0.94641	0	0	0	0	0	0	0	0	0	0	0	0	0	0	0	0	0	0	0	0	0	0	0	0	0	0	0	10.5119	0	10.1039	0	0	0	0	0	0	0	0	0	0
A0A669CQ67	RNA helicase (EC 3.6.4.13)	dhx30	Oreochromis niloticus (Nile tilapia) (Tilapia nilotica)			ATP binding [GO:0005524]; hydrolase activity [GO:0016787]; nucleic acid binding [GO:0003676]; RNA helicase activity [GO:0003724]	KVQQEGDR	0.94416	-1.2139	0	0	0	0	0	10.2959	0	0	0	0	0	0	0	0	0	0	0	0	0	0	0	0	0	0	0	0	0	0	0	0	0	0	0	0	0	0	0	0	0	0
A0A669CQD6	L-lactate dehydrogenase (EC 1.1.1.27)	LDHB	Oreochromis niloticus (Nile tilapia) (Tilapia nilotica)	carboxylic acid metabolic process [GO:0019752]	cytoplasm [GO:0005737]	L-lactate dehydrogenase activity [GO:0004459]	LVVVTAGVR	0	29.017	8.89588	0	0	0	0	0	9.89026	9.88976	9.78306	0	0	0	0	0	0	8.77142	8.66338	8.86205	0	0	0	0	0	0	0	0	0	0	0	0	0	0	0	0	0	0	0	0	0	0
A0A669CQD8	EFR3 homolog B	efr3b	Oreochromis niloticus (Nile tilapia) (Tilapia nilotica)				SVPIYEMK	0.95813	-1.4758	0	0	0	0	0	0	0	0	0	0	0	0	0	0	0	0	0	0	0	0	0	0	0	0	0	0	0	0	0	0	0	0	0	0	0	0	0	0	0	0
A0A669CQE4	Alpha-1,4 glucan phosphorylase (EC 2.4.1.1)	pygl	Oreochromis niloticus (Nile tilapia) (Tilapia nilotica)	glycogen metabolic process [GO:0005977]		glycogen phosphorylase activity [GO:0008184]; linear malto-oligosaccharide phosphorylase activity [GO:0102250]; pyridoxal phosphate binding [GO:0030170]; SHG alpha-glucan phosphorylase activity [GO:0102499]	DYYFALAHTVR	0.98382	-1.6376	0	0	0	0	10.0815	0	0	0	0	0	0	0	0	0	0	0	0	0	0	0	0	0	0	0	0	0	0	0	0	0	0	0	0	0	0	0	0	0	0	0
A0A669CQQ3	Gamma-aminobutyric acid receptor subunit gamma-3	LOC100689728	Oreochromis niloticus (Nile tilapia) (Tilapia nilotica)	gamma-aminobutyric acid signaling pathway [GO:0007214]	chloride channel complex [GO:0034707]; postsynaptic membrane [GO:0045211]	chloride channel activity [GO:0005254]; extracellular ligand-gated ion channel activity [GO:0005230]; GABA-A receptor activity [GO:0004890]	SDATPAR	0.99651	-1.5073	0	0	0	0	0	0	0	0	0	0	0	0	0	0	0	0	0	0	0	0	0	0	0	0	0	0	0	0	0	0	0	0	0	0	0	0	0	0	0	0
A0A669CQV2	SWI/SNF related, matrix associated, actin dependent regulator of chromatin, subfamily a, member 5	smarca5	Oreochromis niloticus (Nile tilapia) (Tilapia nilotica)			ATP binding [GO:0005524]; ATP-dependent chromatin remodeler activity [GO:0140658]	EIKIYVGLSK	0.95309	-1.2624	9.89148	0	9.27926	11.952	0	11.9309	0	0	0	0	0	0	0	0	0	0	0	0	0	0	0	0	0	0	0	0	0	0	0	0	0	10.816	0	0	0	11.027	0	13.1305	13.1082	0
A0A669CR39	protein-tyrosine-phosphatase (EC 3.1.3.48)	PTPRM	Oreochromis niloticus (Nile tilapia) (Tilapia nilotica)	protein dephosphorylation [GO:0006470]	plasma membrane [GO:0005886]	protein tyrosine phosphatase activity [GO:0004725]	DISLQGHQCSNTPHFLHIK	0.93095	-0.61393	0	0	0	0	0	0	0	0	0	10.6366	0	0	0	0	0	0	0	0	0	0	0	0	0	0	0	0	0	0	0	0	0	0	0	0	0	0	0	0	0	0
A0A669CRD2	SRCR domain-containing protein		Oreochromis niloticus (Nile tilapia) (Tilapia nilotica)		membrane [GO:0016020]	scavenger receptor activity [GO:0005044]	SLLRTLLK	0.98678	-1.5984	0	0	0	0	11.4554	0	0	0	0	0	0	10.7663	0	0	0	0	0	0	0	0	0	0	0	0	0	0	0	0	0	0	10.5709	0	0	0	0	0	11.035	0	0	0
A0A669CRD3	SLIT-ROBO Rho GTPase activating protein 1	srgap1	Oreochromis niloticus (Nile tilapia) (Tilapia nilotica)	signal transduction [GO:0007165]			IENEEIKK	0.98654	-1.7336	0	0	0	0	0	0	0	0	0	0	0	0	0	0	0	0	0	0	0	0	0	0	0	0	0	0	0	0	0	0	0	0	0	0	0	0	0	0	0	0
A0A669CRH6	Zinc finger protein 292a		Oreochromis niloticus (Nile tilapia) (Tilapia nilotica)				AEMQKLRISAR	0.38679	-0.41292	0	0	0	9.37632	0	0	0	0	0	0	0	0	0	0	0	0	0	0	0	0	0	0	0	0	0	0	0	0	0	0	0	0	0	0	0	0	0	0	0	0
A0A669CRN3	Hyaluronidase (EC 3.2.1.35)	HYAL2	Oreochromis niloticus (Nile tilapia) (Tilapia nilotica)	carbohydrate metabolic process [GO:0005975]		hyalurononglucosaminidase activity [GO:0004415]	RHSEELVRQK	0.93828	-0.9842	0	0	0	0	0	0	0	0	0	0	0	0	0	0	0	0	0	0	0	0	0	0	0	0	0	0	0	0	0	0	0	0	0	0	0	0	10.4536	0	0	0
A0A669CRN7	Dual specificity phosphatase 10		Oreochromis niloticus (Nile tilapia) (Tilapia nilotica)	protein dephosphorylation [GO:0006470]		MAP kinase tyrosine/serine/threonine phosphatase activity [GO:0017017]; myosin phosphatase activity [GO:0017018]	GGLSSFR	1.0058	-1.5073	0	0	0	0	0	0	0	0	0	0	0	0	0	0	0	0	0	0	0	0	0	0	0	0	0	0	0	0	0	0	0	0	0	0	0	0	0	0	0	0
A0A669CRV2	Uncharacterized LOC100703377	LOC100703377	Oreochromis niloticus (Nile tilapia) (Tilapia nilotica)		membrane [GO:0016020]	interleukin-17 receptor activity [GO:0030368]	FDSHPRETHTRDR	0.98918	-1.8067	0	0	0	0	0	0	0	0	0	0	0	0	0	0	0	10.8122	0	0	0	0	0	0	0	0	0	0	0	0	0	0	0	0	0	0	0	0	0	0	0	0
A0A669CS22	FYVE, RhoGEF and PH domain-containing protein 6	LOC100712554	Oreochromis niloticus (Nile tilapia) (Tilapia nilotica)		cytoplasm [GO:0005737]; cytoskeleton [GO:0005856]	guanyl-nucleotide exchange factor activity [GO:0005085]; metal ion binding [GO:0046872]	EGEARRAEEDEEDGYGDFER	0.99421	-3.4964	0	0	0	0	0	0	0	0	0	0	0	0	0	0	0	0	0	0	0	0	0	0	0	0	10.0736	0	0	0	0	0	0	0	0	0	0	0	0	10.7765	0	0
A0A669CS49	COMM domain-containing protein 5	commd5	Oreochromis niloticus (Nile tilapia) (Tilapia nilotica)				LSDGRFQR	0.97119	-1.5274	0	0	0	0	0	0	0	0	0	0	0	0	0	0	0	0	0	0	0	0	0	0	0	0	0	0	0	0	0	0	0	0	0	0	0	0	0	0	0	0
A0A669CS65	Leucine rich repeat containing 31		Oreochromis niloticus (Nile tilapia) (Tilapia nilotica)				VCVFLKR	0.98623	-1.767	0	0	0	0	0	0	0	0	0	0	0	0	0	0	0	0	0	0	0	0	0	0	0	0	0	0	0	11.8412	11.6594	0	0	0	0	0	0	0	0	0	0	0
A0A669CSA6	Adenosine deaminase RNA specific B2 (inactive)	ADARB2	Oreochromis niloticus (Nile tilapia) (Tilapia nilotica)	RNA processing [GO:0006396]		adenosine deaminase activity [GO:0004000]; RNA binding [GO:0003723]	TFMGLQDSRAK	0.95264	-1.3169	0	0	0	0	0	0	0	0	0	0	0	0	0	0	0	0	0	0	0	0	0	0	0	0	0	0	0	0	0	0	0	0	0	0	0	0	0	8.61688	0	0
A0A669CSE3	Actin alpha cardiac muscle 1	ACTC1	Oreochromis niloticus (Nile tilapia) (Tilapia nilotica)				AGFAGDDAPR	0.95455	-1.3737	0	0	0	0	0	0	0	0	0	0	0	0	0	0	0	0	0	0	0	0	0	0	0	0	0	0	0	0	0	0	0	0	0	0	0	0	0	0	0	0
A0A669CSF2	Tripartite motif-containing protein 16-like	LOC109203652	Oreochromis niloticus (Nile tilapia) (Tilapia nilotica)			zinc ion binding [GO:0008270]	AGSSDECK	0.96076	-1.4773	0	0	0	0	0	0	0	0	13.3256	0	0	0	0	0	10.5017	0	0	0	0	0	0	0	0	0	0	10.1475	0	0	0	0	0	0	0	0	0	0	0	0	0	0
A0A669CSI7	Replication protein A subunit	RPA1	Oreochromis niloticus (Nile tilapia) (Tilapia nilotica)	DNA recombination [GO:0006310]; DNA repair [GO:0006281]; DNA replication [GO:0006260]	PML body [GO:0016605]	DNA binding [GO:0003677]; metal ion binding [GO:0046872]	ATLKPANK	0.98722	-1.7488	0	0	0	0	0	0	0	0	0	0	0	0	0	0	0	0	0	0	0	0	0	0	0	0	0	0	0	0	0	0	0	0	0	0	0	0	0	0	0	0
A0A669CSJ6	Ankyrin 3	ANK3	Oreochromis niloticus (Nile tilapia) (Tilapia nilotica)	signal transduction [GO:0007165]	membrane [GO:0016020]		GDYTPSLR	0.96133	-1.4773	0	0	0	0	0	0	0	0	0	0	0	0	0	0	0	0	0	0	0	0	0	0	0	0	0	0	0	0	0	0	0	0	0	0	0	0	0	0	0	0
A0A669CSM7	Calpain-1 catalytic subunit	LOC100704914	Oreochromis niloticus (Nile tilapia) (Tilapia nilotica)	proteolysis [GO:0006508]		calcium ion binding [GO:0005509]; calcium-dependent cysteine-type endopeptidase activity [GO:0004198]	TPRVLWR	0.99462	-2.9506	0	0	0	0	0	0	0	0	0	0	0	0	0	0	0	0	0	0	0	0	0	0	0	0	0	0	0	0	0	0	0	0	0	0	0	0	0	0	0	0
A0A669CSN3	Ubiquitin specific peptidase 39	usp39	Oreochromis niloticus (Nile tilapia) (Tilapia nilotica)	protein deubiquitination [GO:0016579]; spliceosomal complex assembly [GO:0000245]	nucleus [GO:0005634]	cysteine-type deubiquitinase activity [GO:0004843]; zinc ion binding [GO:0008270]	GHAVEDR	1.0055	-1.5073	0	0	0	0	0	0	0	0	0	0	0	0	0	0	0	0	0	0	0	0	0	0	0	0	0	0	0	0	0	0	0	0	0	0	0	9.28683	0	0	0	0
A0A669CSN9	Inter-alpha-trypsin inhibitor heavy chain 3		Oreochromis niloticus (Nile tilapia) (Tilapia nilotica)				LPKNAFISK	0.97719	-1.5718	0	0	0	0	0	0	0	0	0	0	0	0	0	0	0	0	0	0	0	0	0	0	0	0	0	0	0	0	0	0	0	0	0	0	0	0	0	12.3997	0	0
A0A669CSQ8	GTP-binding nuclear protein Ran	ran	Oreochromis niloticus (Nile tilapia) (Tilapia nilotica)	nucleocytoplasmic transport [GO:0006913]; protein transport [GO:0015031]	nucleus [GO:0005634]	GTP binding [GO:0005525]; GTPase activity [GO:0003924]	LVLVGDGGTGK	0.034483	-0.13434	8.40242	0	0	0	0	0	9.12081	9.26665	9.0818	0	0	0	0	0	0	0	0	0	0	0	0	0	0	0	0	0	0	0	0	0	0	0	0	0	0	0	0	0	0	0
A0A669CSS6	Serine/threonine-protein phosphatase 2A catalytic subunit beta isoform	LOC100710281	Oreochromis niloticus (Nile tilapia) (Tilapia nilotica)			myosin phosphatase activity [GO:0017018]	SRLNLFAPSA	0.97718	-1.5536	0	0	0	0	0	0	0	0	0	0	0	0	0	0	0	0	0	0	0	0	0	0	0	0	0	0	0	0	0	0	0	0	0	0	0	0	0	0	10.0469	0
A0A669CSW7	Tubulin alpha chain	LOC109197098	Oreochromis niloticus (Nile tilapia) (Tilapia nilotica)	microtubule-based process [GO:0007017]	cytoplasm [GO:0005737]; microtubule [GO:0005874]	GTP binding [GO:0005525]; hydrolase activity [GO:0016787]; structural constituent of cytoskeleton [GO:0005200]	DVNSAIATIK	0	4.3041	0	0	0	0	8.66626	0	0	0	0	0	0	0	0	0	0	0	0	0	0	0	0	0	0	0	0	0	0	0	0	0	0	0	0	0	0	0	0	0	0	0
A0A669CSY4	E3 ubiquitin-protein ligase CBL (EC 2.3.2.27)	CBL	Oreochromis niloticus (Nile tilapia) (Tilapia nilotica)	cell surface receptor signaling pathway [GO:0007166]; regulation of signaling [GO:0023051]	cytoplasm [GO:0005737]	aspartyltransferase activity [GO:0047690]; calcium ion binding [GO:0005509]; phosphotyrosine residue binding [GO:0001784]; ubiquitin-protein transferase activity [GO:0004842]	MVEKCWK	0.98434	-1.6243	0	0	0	0	0	9.46119	0	0	0	0	0	0	0	0	0	0	0	0	0	0	0	0	0	0	0	0	0	0	0	0	0	0	0	0	0	0	0	0	0	0
A0A669CSZ1	Inhibitory synaptic factor family member 2B	insyn2b	Oreochromis niloticus (Nile tilapia) (Tilapia nilotica)				EPAQERRR	0.98944	-1.9294	0	0	0	0	0	0	0	0	0	0	0	0	0	0	0	0	0	0	0	0	0	0	0	0	0	0	0	0	0	0	0	0	0	0	0	0	0	0	0	0
A0A669CT33	Zinc finger protein 341	znf341	Oreochromis niloticus (Nile tilapia) (Tilapia nilotica)				AHILSHSGIKPYK	0.9991	-4.277	0	0	0	0	0	0	0	0	0	0	0	0	0	0	0	0	0	0	0	0	0	0	0	0	0	0	0	0	0	0	0	0	0	0	0	0	0	0	0	0
A0A669CT96	alpha-1,2-Mannosidase (EC 3.2.1.-)	edem1	Oreochromis niloticus (Nile tilapia) (Tilapia nilotica)	carbohydrate metabolic process [GO:0005975]; endoplasmic reticulum mannose trimming [GO:1904380]; mannose trimming involved in glycoprotein ERAD pathway [GO:1904382]; response to unfolded protein [GO:0006986]	endoplasmic reticulum quality control compartment [GO:0044322]; membrane [GO:0016020]	calcium ion binding [GO:0005509]; mannosyl-oligosaccharide 1,2-alpha-mannosidase activity [GO:0004571]	QIDHMVGLF	0.95552	-1.4547	0	0	0	0	0	0	0	0	0	0	0	0	0	0	0	0	0	0	0	0	0	8.38332	0	0	0	0	0	0	0	0	0	0	0	0	0	0	0	0	0	0
A0A669CTD5	Sosondowah ankyrin repeat domain family member Ab		Oreochromis niloticus (Nile tilapia) (Tilapia nilotica)				LMDIPRKR	0.93722	-0.94641	0	0	0	0	0	0	0	8.50823	0	0	0	0	0	0	0	0	0	0	0	0	0	0	0	0	0	0	0	0	0	0	0	0	0	0	0	0	0	0	0	0
A0A669CTG1	Oxysterol-binding protein	OSBPL10	Oreochromis niloticus (Nile tilapia) (Tilapia nilotica)	lipid transport [GO:0006869]		lipid binding [GO:0008289]	GSDEHLSVER	0.94461	-1.1767	0	0	0	0	0	0	0	0	0	0	0	0	0	0	0	0	0	0	0	0	0	0	0	0	0	0	0	0	0	0	0	0	0	0	0	0	0	0	0	0
A0A669CTH3	Protein tyrosine phosphatase non-receptor type 9b		Oreochromis niloticus (Nile tilapia) (Tilapia nilotica)	protein dephosphorylation [GO:0006470]		protein tyrosine phosphatase activity [GO:0004725]	FTVLPGR	0.99676	-1.5073	0	0	0	0	0	0	0	0	0	0	0	0	0	0	0	0	0	0	0	0	0	0	0	0	0	0	0	0	0	0	0	0	0	0	0	0	0	0	0	0
A0A669CTK5	Girdin	LOC100703336	Oreochromis niloticus (Nile tilapia) (Tilapia nilotica)	cytoskeleton-dependent intracellular transport [GO:0030705]	cytoplasm [GO:0005737]		HGWGLGLAR	0.9881	-1.9859	0	0	0	0	0	0	0	0	0	0	0	0	0	0	0	0	0	0	0	0	0	0	10.2307	0	0	0	0	0	0	0	0	0	0	0	0	0	0	0	0	0
A0A669CTN2	Kinesin-like protein	KIF5C	Oreochromis niloticus (Nile tilapia) (Tilapia nilotica)	microtubule-based movement [GO:0007018]; system development [GO:0048731]	microtubule [GO:0005874]	ATP binding [GO:0005524]; microtubule binding [GO:0008017]; microtubule motor activity [GO:0003777]	RPQALLSVLER	0.93881	-0.7791	0	0	0	0	9.66463	0	0	0	0	0	0	0	0	0	0	0	0	0	0	0	0	0	0	0	0	0	0	0	0	0	0	0	0	0	0	0	0	0	0	0
A0A669CTP0	Hedgehog protein	dhh	Oreochromis niloticus (Nile tilapia) (Tilapia nilotica)	cell-cell signaling [GO:0007267]; intein-mediated protein splicing [GO:0016539]; protein autoprocessing [GO:0016540]; system development [GO:0048731]	endoplasmic reticulum membrane [GO:0005789]; extracellular space [GO:0005615]; Golgi membrane [GO:0000139]; plasma membrane [GO:0005886]	metal ion binding [GO:0046872]; peptidase activity [GO:0008233]; transferase activity [GO:0016740]	KLTAMRLK	0.93926	-0.95262	0	0	0	0	9.14779	0	0	0	0	0	0	0	0	0	0	0	0	0	0	0	0	0	0	0	0	0	0	0	0	0	0	0	0	0	0	0	0	0	0	0
A0A669CTQ5	Protein phosphatase 2 regulatory subunit B'alpha	ppp2r5a	Oreochromis niloticus (Nile tilapia) (Tilapia nilotica)	signal transduction [GO:0007165]	protein phosphatase type 2A complex [GO:0000159]	protein phosphatase regulator activity [GO:0019888]	YICCNVCLISR	0.94726	-0.84016	0	0	0	0	9.4241	0	0	9.44475	0	0	0	0	0	0	0	0	0	0	0	0	0	0	8.96757	0	0	0	0	0	0	0	0	0	0	0	8.3605	8.29375	0	0	0	0
A0A669CTR6	Reverse transcriptase domain-containing protein		Oreochromis niloticus (Nile tilapia) (Tilapia nilotica)				VLTSTRKR	0.93765	-0.95262	0	0	0	0	0	0	0	0	0	0	0	0	0	0	0	0	0	0	0	0	0	0	0	0	0	0	0	0	0	0	8.56742	0	0	0	0	0	0	0	0	0
A0A669CTX1	Alpha-1,3-mannosyl-glycoprotein 4-beta-N-acetylglucosaminyltransferase A	mgat4a	Oreochromis niloticus (Nile tilapia) (Tilapia nilotica)				AIAETNSSKDALTNFSGNR	0.93172	-0.61392	0	0	0	0	0	0	0	0	0	9.28552	0	0	0	0	0	0	0	0	0	0	0	0	0	0	0	0	0	0	0	0	0	0	0	0	0	0	0	0	0	0
A0A669CU71	Reverse transcriptase domain-containing protein		Oreochromis niloticus (Nile tilapia) (Tilapia nilotica)			2-oxoglutarate-dependent dioxygenase activity [GO:0016706]; methyltransferase activity [GO:0008168]	ITSHFNDSK	0.9297	-1.0716	0	0	0	0	0	0	0	11.2596	0	0	0	0	0	0	0	0	0	0	0	0	0	0	0	0	0	0	0	0	0	0	0	0	0	0	0	0	0	0	0	0
A0A669CUB1	IQ motif containing GTPase activating protein 2	iqgap2	Oreochromis niloticus (Nile tilapia) (Tilapia nilotica)	regulation of GTPase activity [GO:0043087]	plasma membrane bounded cell projection [GO:0120025]		ERMNLLQK	0.99317	-3.6307	0	0	0	11.6799	0	0	0	0	0	0	0	0	0	0	0	0	0	0	0	0	0	0	0	0	0	0	0	0	0	0	0	0	0	0	0	0	0	0	0	0
A0A669CUC8	Phosphoinositide phospholipase C (EC 3.1.4.11)	plcb3	Oreochromis niloticus (Nile tilapia) (Tilapia nilotica)	intracellular signal transduction [GO:0035556]; lipid catabolic process [GO:0016042]		calcium ion binding [GO:0005509]; phosphatidylinositol phospholipase C activity [GO:0004435]	TFEWARK	0.98713	-1.767	0	0	0	0	0	0	0	0	0	0	9.86689	0	0	0	0	0	0	0	0	0	0	0	0	0	0	0	0	0	0	0	0	0	0	0	0	0	0	0	0	0
A0A669CUF4	BCAS3 microtubule associated cell migration factor	bcas3	Oreochromis niloticus (Nile tilapia) (Tilapia nilotica)	autophagy [GO:0006914]			EKIIWVR	0.98365	-1.6243	0	0	0	0	13.6449	13.6985	0	11.7446	0	0	0	0	0	0	0	0	0	0	10.3244	0	0	0	0	0	0	0	0	0	0	0	0	0	0	12.3633	0	0	12.6423	0	12.6282	0
A0A669CUK0	Collagen, type XII, alpha 1a		Oreochromis niloticus (Nile tilapia) (Tilapia nilotica)		collagen trimer [GO:0005581]; extracellular region [GO:0005576]		IEQELLNIKKR	0.9512	-1.4112	0	0	0	0	0	0	0	0	0	0	0	9.15831	0	0	0	0	0	0	0	0	0	0	0	0	0	0	0	0	0	0	0	0	0	0	0	0	0	0	0	0
A0A669CUL8	Leucine rich repeat containing 27	LRRC27	Oreochromis niloticus (Nile tilapia) (Tilapia nilotica)				HQLILLDRAELGSIPQCDK	0.99925	-4.2654	0	0	0	0	0	0	0	0	0	0	0	0	10.5323	10.4742	10.4226	11.3219	11.2373	0	0	0	0	0	0	0	0	10.2651	0	0	0	0	0	0	0	0	11.44	0	0	0	11.5829	0
A0A669CUM8	PH and SEC7 domain-containing protein 1	LOC100711695	Oreochromis niloticus (Nile tilapia) (Tilapia nilotica)	regulation of ARF protein signal transduction [GO:0032012]	ruffle membrane [GO:0032587]	guanyl-nucleotide exchange factor activity [GO:0005085]	SELKENYSQAPPR	0.99802	-2.4718	0	0	0	0	0	0	0	0	0	0	0	0	0	0	0	0	0	0	0	0	0	0	0	0	0	0	0	0	0	0	0	0	0	0	0	0	0	0	0	0
A0A669CUU3	Vacuolar protein sorting 13 homolog D		Oreochromis niloticus (Nile tilapia) (Tilapia nilotica)	lipid transport [GO:0006869]			RLLCLTIRIILR	0.93532	-0.95455	0	11.1669	11.0224	0	0	0	11.0224	11.2006	11.1147	0	0	0	0	11.0905	0	0	11.0963	0	0	0	0	0	9.80787	0	0	0	0	0	0	10.7442	0	0	10.8863	10.9539	0	10.8886	0	0	0	10.6063
A0A669CV31	O-acyltransferase	soat1	Oreochromis niloticus (Nile tilapia) (Tilapia nilotica)		endoplasmic reticulum membrane [GO:0005789]	O-acyltransferase activity [GO:0008374]	VISKKLQLK	0.92969	-1.0109	0	0	0	0	0	0	0	0	0	0	0	0	0	0	0	0	8.33213	0	0	0	0	0	0	0	0	0	8.59332	0	0	0	8.68968	0	0	0	0	0	0	0	0	0
A0A669CVH7	Flavodoxin-like fold domain-containing protein		Oreochromis niloticus (Nile tilapia) (Tilapia nilotica)				EADLVIFQDK	0.95235	-1.4258	0	0	0	0	0	0	0	0	0	0	0	0	0	0	0	0	0	0	0	0	0	0	0	0	0	0	0	0	0	0	0	0	0	0	0	0	0	0	0	0
A0A669CVJ7	Zinc finger and BTB domain containing 3	zbtb3	Oreochromis niloticus (Nile tilapia) (Tilapia nilotica)				TLSLRAPPQIR	0.97159	-1.5252	0	0	0	0	0	9.91873	0	0	0	0	0	0	0	0	0	0	0	0	0	0	0	0	0	0	0	0	0	0	0	0	0	0	0	0	0	0	0	0	0	0
A0A669CVL5	TIAM Rac1 associated GEF 2	tiam2	Oreochromis niloticus (Nile tilapia) (Tilapia nilotica)	activation of GTPase activity [GO:0090630]; small GTPase mediated signal transduction [GO:0007264]		guanyl-nucleotide exchange factor activity [GO:0005085]	GEGTLER	0.99546	-2.6575	0	0	0	0	0	0	0	0	0	0	0	0	0	0	0	0	0	0	0	0	0	10.627	0	0	0	0	0	0	0	0	0	0	0	0	0	0	0	0	0	0
A0A669CVL6	C-type lectin domain family 4 member M	LOC100711060	Oreochromis niloticus (Nile tilapia) (Tilapia nilotica)		membrane [GO:0016020]		DPEFVDWIRR	0.98786	-1.7306	0	0	0	0	0	0	10.0352	0	0	0	0	0	0	0	0	0	0	0	0	0	0	0	0	0	0	0	0	0	0	0	0	0	0	0	0	0	0	0	0	0
A0A669CVN0	Mitogen-activated protein kinase kinase kinase 3	LOC100711264	Oreochromis niloticus (Nile tilapia) (Tilapia nilotica)	protein phosphorylation [GO:0006468]		ATP binding [GO:0005524]; protein kinase activity [GO:0004672]	NRTLLYKQDLR	0.93962	-0.93421	0	0	0	0	0	0	0	0	0	0	0	0	0	0	0	0	0	0	0	0	0	0	0	0	0	0	0	0	0	0	0	0	0	0	0	0	0	0	0	0
A0A669CVV2	Sodium/hydrogen exchanger	LOC100705785	Oreochromis niloticus (Nile tilapia) (Tilapia nilotica)	regulation of pH [GO:0006885]	membrane [GO:0016020]	sodium:proton antiporter activity [GO:0015385]	ERTVAYRGK	0.98577	-1.6054	0	0	0	0	0	0	0	0	0	0	0	0	0	0	0	0	0	0	0	0	0	0	0	0	0	0	0	0	0	0	0	0	0	0	0	0	0	9.30408	0	0
A0A669CVV9	RNA helicase (EC 3.6.4.13)		Oreochromis niloticus (Nile tilapia) (Tilapia nilotica)		membrane [GO:0016020]	ATP binding [GO:0005524]; hydrolase activity [GO:0016787]; nucleic acid binding [GO:0003676]; RNA helicase activity [GO:0003724]	GLDIPSIR	0.95171	-1.425	0	0	0	0	0	0	0	0	0	0	0	0	0	0	0	0	0	0	0	0	0	0	0	0	0	0	0	0	0	8.35843	0	0	0	0	0	0	0	0	0	0
A0A669CVY9	Geminin coiled-coil domain containing	gmnc	Oreochromis niloticus (Nile tilapia) (Tilapia nilotica)				LTADGRRK	0.93798	-0.9003	0	0	0	0	0	0	0	0	0	0	0	0	0	0	0	0	0	0	0	0	0	0	0	0	0	0	0	0	0	0	0	0	0	0	0	0	0	0	0	0
A0A669CW10	Fibulin-7-like	LOC100701524	Oreochromis niloticus (Nile tilapia) (Tilapia nilotica)	animal organ development [GO:0048513]	cellular anatomical entity [GO:0110165]	calcium ion binding [GO:0005509]	RMELLSRMK	0.93007	-1.0109	0	0	0	0	0	0	0	0	0	0	0	0	0	0	0	0	0	0	0	0	0	0	0	0	0	0	0	0	0	0	0	0	0	0	0	0	0	0	9.20004	0
A0A669CW17	[histone H3]-trimethyl-L-lysine(9) demethylase (EC 1.14.11.66)	kdm4a	Oreochromis niloticus (Nile tilapia) (Tilapia nilotica)		intracellular organelle [GO:0043229]	histone H3K9me2/H3K9me3 demethylase activity [GO:0140684]; metal ion binding [GO:0046872]	LYLQFLNV	0.99728	-2.1867	0	0	0	0	0	0	0	0	0	0	0	0	0	0	0	0	0	0	0	0	0	0	0	0	0	0	0	0	0	0	0	0	0	0	0	0	0	0	0	0
A0A669CW59	PiggyBac transposable element-derived protein domain-containing protein		Oreochromis niloticus (Nile tilapia) (Tilapia nilotica)				ETHRFKPWLR	0.98176	-1.6504	0	0	0	0	9.44617	0	0	0	0	0	0	0	0	0	0	0	0	0	0	0	0	0	0	0	0	0	0	0	0	0	0	0	0	0	0	0	0	0	0	0
A0A669CW64	Uncharacterized protein		Oreochromis niloticus (Nile tilapia) (Tilapia nilotica)		membrane [GO:0016020]		LMDMSCGK	0.96045	-1.477	0	0	0	0	0	0	0	0	0	0	0	0	10.12	0	0	0	0	0	0	0	0	0	0	0	0	0	0	0	0	0	0	0	0	0	0	0	0	0	0	0
A0A669CW66	Microtubule-associated protein RP/EB family member 3	LOC100704238	Oreochromis niloticus (Nile tilapia) (Tilapia nilotica)	cell cycle [GO:0007049]; cell division [GO:0051301]	cytoplasm [GO:0005737]; microtubule [GO:0005874]	microtubule binding [GO:0008017]	RNQGPQR	0.95269	-1.2536	0	0	0	14.2428	0	0	0	0	0	0	0	0	0	0	0	0	0	0	0	0	0	0	0	0	0	0	0	0	0	0	0	0	0	0	0	0	0	0	0	0
A0A669CW86	G-protein coupled receptors family 1 profile domain-containing protein		Oreochromis niloticus (Nile tilapia) (Tilapia nilotica)		membrane [GO:0016020]	G protein-coupled receptor activity [GO:0004930]	QLSPPSPHSCSTTALSK	0.92122	-0.65709	0	0	0	0	0	0	0	0	0	0	0	0	0	0	0	0	0	0	0	0	0	0	0	0	0	0	0	0	0	0	0	0	0	0	0	0	0	0	0	0
A0A669CW89	Ral GEF with PH domain and SH3 binding motif 2	ralgps2	Oreochromis niloticus (Nile tilapia) (Tilapia nilotica)	small GTPase mediated signal transduction [GO:0007264]		guanyl-nucleotide exchange factor activity [GO:0005085]	FVEDDNYK	0.99194	-2.1196	0	0	0	0	0	0	0	0	0	0	0	0	0	0	0	0	0	0	0	0	0	0	0	0	0	0	0	0	0	0	0	0	0	0	0	0	0	0	0	0
A0A669CWJ2	Pumilio RNA binding family member 1	pum1	Oreochromis niloticus (Nile tilapia) (Tilapia nilotica)			RNA binding [GO:0003723]	FASNVVEK	0.96263	-1.4742	0	0	9.92092	0	0	0	0	0	10.1566	0	0	0	0	0	0	0	0	0	0	0	0	0	0	0	0	0	0	0	0	0	0	0	0	0	0	0	0	0	0	0
A0A669CWJ9	Transmembrane channel-like protein		Oreochromis niloticus (Nile tilapia) (Tilapia nilotica)		plasma membrane [GO:0005886]		IGSAGYR	0.99713	-2.2181	0	0	0	0	0	0	0	0	0	0	0	0	0	0	0	0	0	0	0	0	0	0	0	0	0	0	0	0	0	0	0	0	0	0	0	0	0	0	12.9404	0
A0A669CWZ9	CWC27 spliceosome associated cyclophilin	cwc27	Oreochromis niloticus (Nile tilapia) (Tilapia nilotica)	protein folding [GO:0006457]; protein peptidyl-prolyl isomerization [GO:0000413]		peptidyl-prolyl cis-trans isomerase activity [GO:0003755]	DDVKEVEK	0.97805	-1.5798	0	0	0	0	0	0	0	0	0	0	0	0	0	0	0	0	0	0	0	0	0	0	0	0	0	0	0	0	0	0	0	0	0	0	0	0	0	0	0	0
A0A669CXC8	Histidine decarboxylase	hdc	Oreochromis niloticus (Nile tilapia) (Tilapia nilotica)	amino acid metabolic process [GO:0006520]; catecholamine biosynthetic process [GO:0042423]		carboxy-lyase activity [GO:0016831]; pyridoxal phosphate binding [GO:0030170]	QAEEYNRR	0.988	-1.7225	0	0	0	0	0	0	0	0	0	0	0	0	0	0	0	0	0	0	0	0	0	0	0	0	0	0	0	0	0	0	0	0	0	0	0	0	0	0	0	0
A0A669CXF7	Short transient receptor potential channel 7	LOC100711831	Oreochromis niloticus (Nile tilapia) (Tilapia nilotica)		membrane [GO:0016020]	calcium channel activity [GO:0005262]	MHRRHTTLR	0.93878	-0.9861	0	0	0	0	9.53993	0	0	0	0	0	0	0	0	0	0	0	0	0	0	0	0	0	0	0	0	0	0	0	0	0	0	0	0	0	0	0	0	0	0	0
A0A669CXJ8	G domain-containing protein		Oreochromis niloticus (Nile tilapia) (Tilapia nilotica)			GTP binding [GO:0005525]	ADSVSIIDGETWR	0.9881	-1.9911	0	0	0	0	0	0	0	0	0	0	0	0	0	0	0	0	0	0	0	0	0	0	0	0	0	0	0	0	0	0	0	0	0	0	0	0	0	0	0	0
A0A669CXP6	NACHT and WD repeat domain containing 2		Oreochromis niloticus (Nile tilapia) (Tilapia nilotica)				TPTFLSLSQR	0.96265	-1.4918	0	0	0	10.3538	0	0	0	0	0	0	0	0	0	0	0	0	0	0	0	0	0	0	0	0	0	0	0	0	0	0	0	0	0	0	0	0	0	0	0	0
A0A669CXV9	Uncharacterized LOC102076116	LOC102076116	Oreochromis niloticus (Nile tilapia) (Tilapia nilotica)		membrane [GO:0016020]		GLNLVQVK	0.95889	-1.4654	0	0	0	0	0	0	0	15.08	0	0	0	0	0	13.3336	0	0	13.9942	0	0	0	0	0	0	0	0	0	0	0	0	0	0	0	0	0	0	0	0	0	0	0
A0A669CXX0	G protein-regulated inducer of neurite outgrowth C-terminal domain-containing protein		Oreochromis niloticus (Nile tilapia) (Tilapia nilotica)				LHGGQKK	0.99801	-2.3725	12.3169	0	0	0	0	0	0	0	0	0	0	0	0	0	0	0	0	0	0	0	0	0	0	0	0	0	0	0	0	0	0	0	0	0	0	0	0	0	0	0
A0A669CY15	non-specific serine/threonine protein kinase (EC 2.7.11.1)	trio	Oreochromis niloticus (Nile tilapia) (Tilapia nilotica)	protein phosphorylation [GO:0006468]	cytoplasm [GO:0005737]; membrane [GO:0016020]	ATP binding [GO:0005524]; guanyl-nucleotide exchange factor activity [GO:0005085]; protein serine/threonine kinase activity [GO:0004674]	EHEEFHITAK	0.99508	-2.9231	0	10.1704	0	0	0	0	10.8789	0	0	0	0	0	9.75592	0	9.05696	0	0	0	9.23735	0	0	0	0	0	0	8.97467	0	11.5348	11.6476	0	12.6214	12.6262	0	0	0	0	0	9.43377	0	0
A0A669CY19	ribonuclease H (EC 3.1.26.4)		Oreochromis niloticus (Nile tilapia) (Tilapia nilotica)				HKGQKHWP	0.93567	-0.95225	0	0	0	0	0	0	0	0	0	0	0	0	0	0	0	0	0	0	0	0	0	0	0	0	0	0	0	0	0	0	0	0	0	0	0	0	0	9.94524	0	0
A0A669CY24	Solute carrier family 25 member 18		Oreochromis niloticus (Nile tilapia) (Tilapia nilotica)	transmembrane transport [GO:0055085]	membrane [GO:0016020]		TRLQTLQK	0.97858	-1.5867	0	0	0	0	0	0	0	0	0	0	0	0	0	0	0	0	0	0	0	0	0	0	0	0	0	0	0	0	0	0	0	0	0	0	0	0	0	0	0	0
A0A669CYD2	Choline phosphotransferase 1	chpt1	Oreochromis niloticus (Nile tilapia) (Tilapia nilotica)	phospholipid biosynthetic process [GO:0008654]	membrane [GO:0016020]	phosphotransferase activity, for other substituted phosphate groups [GO:0016780]	MGLIHLK	1.0053	-1.5073	0	0	0	0	0	0	0	0	0	0	0	0	0	0	0	0	12.3976	0	0	0	10.8104	0	0	0	0	11.23	0	0	0	0	0	13.5215	0	0	0	0	0	0	0	0
A0A669CYD5	Pyridoxal dependent decarboxylase domain containing 1	pdxdc1	Oreochromis niloticus (Nile tilapia) (Tilapia nilotica)	carboxylic acid metabolic process [GO:0019752]		carbon-carbon lyase activity [GO:0016830]; pyridoxal phosphate binding [GO:0030170]	KGILEAELQLQK	0.38596	-0.43436	0	0	0	0	0	0	0	0	0	0	0	0	0	0	0	0	0	0	0	0	0	0	0	0	0	0	0	0	0	0	0	0	0	0	0	0	0	0	0	0
A0A669CYD6	Centrosomal protein 290	cep290	Oreochromis niloticus (Nile tilapia) (Tilapia nilotica)	cell projection organization [GO:0030030]	cell projection [GO:0042995]; cytoplasm [GO:0005737]; cytoskeleton [GO:0005856]		AEIKHVK	0.99755	-2.568	0	0	0	0	0	12.8355	0	0	0	0	0	0	0	0	0	0	0	0	0	0	0	0	0	0	0	0	0	0	0	0	0	0	11.856	0	0	0	0	0	0	0
A0A669CYI6	Cholinergic receptor, nicotinic, alpha 4b		Oreochromis niloticus (Nile tilapia) (Tilapia nilotica)		postsynaptic membrane [GO:0045211]	acetylcholine-gated cation-selective channel activity [GO:0022848]; transmembrane signaling receptor activity [GO:0004888]	RPPGTKQPLR	0.98496	-1.6152	0	0	0	0	0	0	0	0	0	0	9.82345	0	0	0	0	0	0	0	0	0	0	0	0	0	0	0	0	0	0	0	0	0	0	0	0	0	0	0	0	0
A0A669CYK9	V-maf avian musculoaponeurotic fibrosarcoma oncogene homolog b (paralog b)	MAF	Oreochromis niloticus (Nile tilapia) (Tilapia nilotica)		nucleus [GO:0005634]	DNA binding [GO:0003677]; DNA-binding transcription factor activity [GO:0003700]	GYAQSCRYK	0.94989	-1.4156	0	0	0	0	0	0	0	0	0	0	0	0	0	0	0	0	0	0	0	0	0	0	0	0	0	0	0	0	0	0	0	0	0	0	0	0	0	0	0	0
A0A669CYZ5	non-specific protein-tyrosine kinase (EC 2.7.10.2)		Oreochromis niloticus (Nile tilapia) (Tilapia nilotica)	positive regulation of cell population proliferation [GO:0008284]; regulation of cellular component organization [GO:0051128]; response to stimulus [GO:0050896]; signal complex assembly [GO:0007172]	cell projection [GO:0042995]; cytoskeleton [GO:0005856]; focal adhesion [GO:0005925]; plasma membrane [GO:0005886]	ATP binding [GO:0005524]; non-membrane spanning protein tyrosine kinase activity [GO:0004715]	GNALDKK	0.98694	-1.767	0	0	0	0	0	0	0	0	0	0	0	0	0	0	0	0	0	0	0	0	0	0	0	0	0	0	0	0	0	11.7686	0	0	0	0	0	0	0	0	0	0
A0A669CZ18	RNA exonuclease 1 homolog	rexo1	Oreochromis niloticus (Nile tilapia) (Tilapia nilotica)			exonuclease activity [GO:0004527]; nucleic acid binding [GO:0003676]	AASQASSPSFSGER	0.99955	-4.4852	0	0	0	0	0	0	0	0	0	0	0	0	0	0	0	0	0	0	0	0	0	0	0	0	0	0	0	0	0	0	0	0	0	0	0	0	0	0	0	0
A0A669CZ58	Phosphatidylinositol 4-phosphate 5-kinase type-1 beta	LOC100707864	Oreochromis niloticus (Nile tilapia) (Tilapia nilotica)	phosphorylation [GO:0016310]		ATP binding [GO:0005524]; phosphatidylinositol phosphate kinase activity [GO:0016307]	TVPSALLR	0.95775	-1.4708	0	0	0	0	0	0	0	0	0	0	0	0	0	0	0	0	0	0	0	0	0	0	0	0	0	0	0	0	9.49735	0	0	0	0	0	0	0	0	0	0	0
A0A669CZ88	Reverse transcriptase domain-containing protein		Oreochromis niloticus (Nile tilapia) (Tilapia nilotica)	regulation of DNA-templated transcription [GO:0006355]	nucleus [GO:0005634]		VVPIFKK	0.94998	-1.2757	0	11.245	0	0	0	0	0	0	0	0	0	0	0	0	0	0	0	0	0	0	0	0	0	0	0	0	0	0	10.8094	0	0	0	0	0	0	0	0	0	0	0
A0A669CZ92	Testis development-related protein	LOC102080552	Oreochromis niloticus (Nile tilapia) (Tilapia nilotica)	spermatogenesis [GO:0007283]			LAELKTKTN	0.99818	-2.4425	9.15411	0	0	0	0	0	0	0	0	0	0	0	0	0	0	0	0	0	0	0	0	0	0	0	0	0	0	0	0	0	0	0	0	0	0	0	0	0	0	0
A0A669CZJ1	Macro domain-containing protein		Oreochromis niloticus (Nile tilapia) (Tilapia nilotica)	proteolysis [GO:0006508]		cysteine-type peptidase activity [GO:0008234]; metal ion binding [GO:0046872]	LETKLPR	0.94064	-1.115	0	0	12.0846	11.1383	10.9424	11.0014	0	13.3112	0	11.1797	9.75206	9.66784	11.5939	11.5178	0	0	0	0	10.9904	0	10.5975	10.7536	0	10.3376	0	11.3762	11.4051	0	0	9.3845	0	10.8004	0	10.4331	0	10.439	11.4626	0	11.4527	0
A0A669CZK4	Casein kinase I	LOC100696848	Oreochromis niloticus (Nile tilapia) (Tilapia nilotica)	protein phosphorylation [GO:0006468]	cytoplasm [GO:0005737]	ATP binding [GO:0005524]; protein serine/threonine kinase activity [GO:0004674]	NEADAAPPNPATR	0.98425	-1.6403	0	0	0	0	0	0	0	0	0	0	0	0	0	0	0	0	0	0	0	0	0	0	0	0	0	0	0	0	0	0	0	0	0	0	0	0	0	0	0	0
A0A669CZK6	Sterol carrier protein 2 (EC 2.3.1.155) (EC 2.3.1.16) (EC 2.3.1.176) (Acetyl-CoA C-myristoyltransferase) (Non-specific lipid-transfer protein) (Propanoyl-CoA C-acyltransferase) (SCP-2/3-oxoacyl-CoA thiolase) (SCP-2/thiolase) (SCP-chi) (Sterol carrier protein X)		Oreochromis niloticus (Nile tilapia) (Tilapia nilotica)	lipid transport [GO:0006869]	mitochondrion [GO:0005739]; peroxisome [GO:0005777]	acetyl-CoA C-acyltransferase activity [GO:0003988]; acetyl-CoA C-myristoyltransferase activity [GO:0050633]; lipid binding [GO:0008289]; propanoyl-CoA C-acyltransferase activity [GO:0033814]; propionyl-CoA C2-trimethyltridecanoyltransferase activity [GO:0050632]	SQLLRRVHR	0.92937	-1.064	0	0	0	0	0	0	0	0	0	0	0	0	0	0	0	0	0	0	0	0	0	0	0	0	0	0	0	0	0	0	0	0	0	0	0	0	0	0	0	0
A0A669CZM1	Phosphatidylinositol 4-phosphate 5-kinase type-1 alpha	PIP5K1A	Oreochromis niloticus (Nile tilapia) (Tilapia nilotica)	phosphorylation [GO:0016310]		ATP binding [GO:0005524]; phosphatidylinositol phosphate kinase activity [GO:0016307]	ASAKEREK	0.94292	-0.87431	0	0	0	0	0	0	0	0	0	0	0	0	0	0	0	0	0	8.69995	0	0	0	0	0	0	0	0	0	0	0	0	0	0	0	0	0	0	0	0	0	0
A0A669CZQ0	Polypeptide N-acetylgalactosaminyltransferase 5	GALNT5	Oreochromis niloticus (Nile tilapia) (Tilapia nilotica)		membrane [GO:0016020]		TMSIMRLRR	0.9317	-1.0109	0	0	0	9.6949	0	0	0	0	0	0	0	0	0	0	0	0	0	0	0	0	0	0	0	0	0	0	0	0	0	0	0	0	0	0	0	0	0	0	0	0
A0A669CZZ1	Uncharacterized protein		Oreochromis niloticus (Nile tilapia) (Tilapia nilotica)		membrane [GO:0016020]		KDNYTCFKFSTDR	0.99368	-2.1481	0	0	0	0	0	0	0	0	0	0	0	0	0	0	0	0	0	0	0	0	0	0	0	0	0	0	0	0	0	0	0	0	0	0	0	0	0	0	0	0
A0A669CZZ3	Protein Wnt		Oreochromis niloticus (Nile tilapia) (Tilapia nilotica)	animal organ development [GO:0048513]; Wnt signaling pathway [GO:0016055]	extracellular region [GO:0005576]	signaling receptor binding [GO:0005102]	GSPEHARMLMNLHNNEAGR	0.91772	-0.54973	0	0	0	0	0	0	0	0	0	0	0	0	0	0	0	0	0	0	0	0	0	0	0	0	0	0	0	0	0	0	0	0	0	0	0	0	0	0	0	0
A0A669D046	Ankyrin repeat domain 24		Oreochromis niloticus (Nile tilapia) (Tilapia nilotica)			actin binding [GO:0003779]	VLALIVKKGLCPTK	0.9302	-1.0467	0	0	0	0	0	0	0	0	0	0	0	0	0	0	0	0	0	0	0	0	0	0	0	0	0	0	0	0	0	0	0	0	0	0	0	0	10.7728	0	0	0
A0A669D063	Alpha-ketoglutarate-dependent dioxygenase FTO (EC 1.14.11.53) (U6 small nuclear RNA (2'-O-methyladenosine-N(6)-)-demethylase FTO) (U6 small nuclear RNA N(6)-methyladenosine-demethylase FTO) (mRNA (2'-O-methyladenosine-N(6)-)-demethylase FTO) (mRNA N(6)-methyladenosine demethylase FTO) (tRNA N1-methyl adenine demethylase FTO)	fto	Oreochromis niloticus (Nile tilapia) (Tilapia nilotica)	DNA dealkylation involved in DNA repair [GO:0006307]; oxidative single-stranded DNA demethylation [GO:0035552]; oxidative single-stranded RNA demethylation [GO:0035553]; regulation of multicellular organism growth [GO:0040014]; RNA repair [GO:0042245]	cytoplasm [GO:0005737]; nuclear speck [GO:0016607]	metal ion binding [GO:0046872]; oxidative DNA demethylase activity [GO:0035516]; oxidative RNA demethylase activity [GO:0035515]	EEPYYGMGK	0.9878	-1.868	10.1662	0	0	0	0	0	0	0	0	0	0	0	0	0	0	0	0	0	0	0	0	0	0	0	0	0	0	0	0	0	0	0	0	0	0	9.73084	0	0	10.2068	0
A0A669D0D3	Protein pelota homolog	pelo	Oreochromis niloticus (Nile tilapia) (Tilapia nilotica)	nuclear-transcribed mRNA catabolic process, no-go decay [GO:0070966]; nuclear-transcribed mRNA catabolic process, non-stop decay [GO:0070481]; RNA surveillance [GO:0071025]		endonuclease activity [GO:0004519]; metal ion binding [GO:0046872]	YVRLVDNVR	0.97741	-1.5718	0	0	0	0	0	0	0	0	0	0	0	0	0	0	0	0	0	0	0	0	0	0	0	0	0	0	0	0	0	0	0	0	0	0	0	0	0	0	10.2726	0
A0A669D0G7	BicC family RNA binding protein 1	bicc1	Oreochromis niloticus (Nile tilapia) (Tilapia nilotica)		membrane [GO:0016020]	RNA binding [GO:0003723]	IMSVLDTK	0.91639	-0.54405	10.5258	0	10.2093	11.4834	10.5148	11.4794	0	0	0	0	0	0	0	0	0	9.68129	0	9.17929	8.83968	0	8.91964	0	0	8.92588	10.6629	0	10.7682	0	0	0	0	9.14287	0	0	8.07414	0	9.44512	9.1746	9.28817	8.6414
A0A669D0H9	Elongation of very long chain fatty acids protein (EC 2.3.1.199) (Very-long-chain 3-oxoacyl-CoA synthase)	LOC100695278	Oreochromis niloticus (Nile tilapia) (Tilapia nilotica)	fatty acid biosynthetic process [GO:0006633]	membrane [GO:0016020]	fatty acid elongase activity [GO:0009922]; very-long-chain 3-ketoacyl-CoA synthase activity [GO:0102756]	YITLIACVLR	0.99611	-2.6757	0	0	0	0	0	0	0	0	0	0	0	0	0	0	0	0	0	0	0	0	0	0	0	0	0	0	0	0	0	0	0	0	0	0	0	0	0	0	10.2367	0
A0A669D0M6	Armadillo like helical domain containing 3	armh3	Oreochromis niloticus (Nile tilapia) (Tilapia nilotica)		membrane [GO:0016020]		RCVQIIHK	0.99802	-2.4465	0	0	0	0	0	0	0	0	0	10.0217	0	0	0	0	0	0	0	0	0	0	0	0	0	0	0	0	0	0	0	0	0	0	0	0	0	0	0	0	0	0
A0A669D0T5	PH domain-containing protein		Oreochromis niloticus (Nile tilapia) (Tilapia nilotica)			guanyl-nucleotide exchange factor activity [GO:0005085]	LENKSFAKLK	0.93531	-0.94109	0	0	0	0	0	0	0	0	0	0	0	0	0	0	0	0	0	0	0	0	0	0	0	0	0	0	0	0	0	0	0	0	0	0	0	0	10.3815	0	0	0
A0A669D0X7	Tc1-like transposase DDE domain-containing protein		Oreochromis niloticus (Nile tilapia) (Tilapia nilotica)			nucleic acid binding [GO:0003676]	GQRVPVR	0.9826	-1.6243	0	0	0	0	0	0	0	0	0	0	0	0	0	11.4343	0	0	0	0	0	0	0	0	0	0	0	0	0	0	0	0	0	13.5215	0	0	0	0	0	0	0	0
A0A669D132	Transketolase	TKT	Oreochromis niloticus (Nile tilapia) (Tilapia nilotica)			metal ion binding [GO:0046872]; transferase activity [GO:0016740]	AVELAANTK	0	0.091661	0	0	0	0	0	0	9.01477	0	0	0	0	0	0	0	0	8.37621	0	8.19653	0	0	0	0	0	0	0	8.70494	8.781	0	0	0	0	0	0	0	0	0	0	0	0	0
A0A669D152	Protein NDNF	LOC102076914	Oreochromis niloticus (Nile tilapia) (Tilapia nilotica)		extracellular region [GO:0005576]		GPGTEEK	1.005	-1.5073	0	0	0	0	0	0	0	0	0	0	0	0	0	0	0	0	0	0	0	0	0	0	0	0	0	0	0	0	0	0	0	0	0	0	0	0	0	0	0	0
A0A669D1A9	cAMP-dependent protein kinase (EC 2.7.11.11)	LOC100700452	Oreochromis niloticus (Nile tilapia) (Tilapia nilotica)	protein phosphorylation [GO:0006468]	cytoplasm [GO:0005737]	AMP-activated protein kinase activity [GO:0004679]; ATP binding [GO:0005524]; cAMP-dependent protein kinase activity [GO:0004691]	KPTLNSLK	0.99421	-3.4908	0	0	0	0	0	0	0	0	0	0	0	0	0	0	0	0	0	0	0	0	0	0	0	0	0	0	0	0	0	0	0	0	0	0	0	0	0	0	0	0
A0A669D1F5	Reverse transcriptase domain-containing protein		Oreochromis niloticus (Nile tilapia) (Tilapia nilotica)				GTALEWFR	0.95317	-1.2419	10.1649	10.2265	10.2946	8.981	8.83014	8.89373	10.9756	11.0372	11.0621	0	0	0	9.52388	0	0	10.2221	10.1306	0	0	0	9.0774	9.88941	9.73946	9.62315	10.5549	10.327	0	0	0	0	9.29416	9.47342	9.45681	8.71249	8.72264	8.74886	9.34897	9.17005	9.27321	0
A0A669D1H4	Kinesin-like protein KIF21A	LOC100692380	Oreochromis niloticus (Nile tilapia) (Tilapia nilotica)	microtubule-based movement [GO:0007018]; system development [GO:0048731]	cytoskeleton [GO:0005856]; membrane [GO:0016020]	ATP binding [GO:0005524]; microtubule binding [GO:0008017]; microtubule motor activity [GO:0003777]	EIEDLRAK	0.97917	-1.5621	0	0	0	0	0	0	0	0	0	0	0	0	0	0	0	0	0	0	0	0	0	0	0	0	0	0	0	0	0	0	0	0	0	0	0	0	0	0	0	0
A0A669D1N1	E1A binding protein p400	ep400	Oreochromis niloticus (Nile tilapia) (Tilapia nilotica)		nucleus [GO:0005634]	ATP binding [GO:0005524]; ATP-dependent chromatin remodeler activity [GO:0140658]	SKDIHIYR	0.99283	-3.1002	0	9.45391	0	0	0	0	0	0	0	0	0	0	0	0	0	10.8277	0	0	0	0	0	0	0	0	0	0	0	0	0	0	0	0	0	0	0	0	0	0	11.4487	0
A0A669D1P7	Glutamyl-tRNA(Gln) amidotransferase subunit B, mitochondrial (Glu-AdT subunit B) (EC 6.3.5.-) (Cytochrome oxidase assembly factor PET112 homolog) (PET112-like)	gatb GATB PET112 PET112L	Oreochromis niloticus (Nile tilapia) (Tilapia nilotica)	glutaminyl-tRNAGln biosynthesis via transamidation [GO:0070681]; mitochondrial translation [GO:0032543]	glutamyl-tRNA(Gln) amidotransferase complex [GO:0030956]; mitochondrion [GO:0005739]	ATP binding [GO:0005524]; glutaminyl-tRNA synthase (glutamine-hydrolyzing) activity [GO:0050567]	QISVLCPK	0.95327	-1.3345	0	0	0	0	0	0	0	0	0	0	0	0	0	0	0	0	0	0	0	0	0	0	0	0	0	9.35931	9.51605	0	0	0	0	0	0	0	0	0	0	0	0	0
A0A669D1W8	Ankyrin 2	ANK2	Oreochromis niloticus (Nile tilapia) (Tilapia nilotica)	localization [GO:0051179]; signal transduction [GO:0007165]	cytoskeleton [GO:0005856]; membrane [GO:0016020]		APAKPTSSQGR	0.9977	-2.4823	8.58402	8.69101	0	0	0	0	9.11197	9.2086	0	0	0	0	0	0	0	0	0	0	0	0	0	8.25927	0	0	0	0	0	0	0	0	0	0	0	0	0	0	0	0	0	0
A0A669D1Y3	Integrase catalytic domain-containing protein		Oreochromis niloticus (Nile tilapia) (Tilapia nilotica)	DNA integration [GO:0015074]		nucleic acid binding [GO:0003676]	LWDFQHKTSSPGYPQSNEK	0.050633	-0.33053	0	0	0	0	0	0	0	0	0	0	0	9.21053	0	0	0	0	0	0	0	0	0	0	0	0	0	0	0	0	0	0	0	0	0	0	0	0	0	0	0	0
A0A669D1Z1	DENN domain-containing protein 1B	LOC100692725	Oreochromis niloticus (Nile tilapia) (Tilapia nilotica)		cytoplasmic vesicle [GO:0031410]	guanyl-nucleotide exchange factor activity [GO:0005085]	GGSVSHRR	0.99849	-2.2747	0	0	0	0	0	0	0	0	0	0	0	0	0	0	0	0	0	0	0	0	0	0	0	0	0	0	0	0	0	0	0	0	0	0	0	0	0	0	0	0
A0A669D206	Tachykinin-3-like	LOC102082036	Oreochromis niloticus (Nile tilapia) (Tilapia nilotica)	tachykinin receptor signaling pathway [GO:0007217]	extracellular region [GO:0005576]		FIYPDWLSQR	0.97237	-1.5402	0	0	0	0	0	9.81429	0	0	0	0	0	0	0	0	0	0	0	0	0	0	0	0	0	0	0	0	0	0	0	0	0	0	0	0	0	0	0	0	0	0
A0A669D207	Uncharacterized protein		Oreochromis niloticus (Nile tilapia) (Tilapia nilotica)		membrane [GO:0016020]		MSEPNKYR	0.97793	-1.5867	0	0	0	8.96864	0	0	0	0	0	0	0	0	0	0	0	0	0	0	0	0	0	0	0	0	0	0	0	0	0	0	0	0	0	0	0	0	0	0	0	0
A0A669D239	DNA damage inducible transcript 3	ddit3	Oreochromis niloticus (Nile tilapia) (Tilapia nilotica)		cytoplasm [GO:0005737]; nucleus [GO:0005634]	DNA binding [GO:0003677]	TRRALIER	0.93649	-0.95296	0	0	0	0	0	0	0	0	0	8.99461	0	0	0	0	0	0	0	0	0	0	0	0	0	0	0	0	0	0	0	0	0	0	0	0	0	0	0	0	0	0
A0A669D2C3	Thyroid hormone receptor beta	thrb	Oreochromis niloticus (Nile tilapia) (Tilapia nilotica)		nucleus [GO:0005634]	nuclear receptor activity [GO:0004879]; sequence-specific DNA binding [GO:0043565]; zinc ion binding [GO:0008270]	NLNPTYACK	0.99404	-3.0322	0	0	0	0	0	0	0	0	0	0	0	0	0	0	0	0	0	0	0	0	0	0	0	0	0	0	0	0	0	0	0	0	0	0	0	0	0	0	0	0
A0A669D2C5	Dedicator of cytokinesis 5	dock5	Oreochromis niloticus (Nile tilapia) (Tilapia nilotica)	small GTPase mediated signal transduction [GO:0007264]	cytoplasm [GO:0005737]	guanyl-nucleotide exchange factor activity [GO:0005085]	QRLFLVCQIIR	0.99765	-2.2954	0	0	0	0	0	0	0	0	0	0	10.7381	0	0	0	0	0	0	0	0	0	0	0	0	0	0	0	0	0	0	0	0	0	0	0	0	0	0	0	0	0
A0A669D2C8	T-box transcription factor 15	tbx15	Oreochromis niloticus (Nile tilapia) (Tilapia nilotica)	embryo development [GO:0009790]; positive regulation of DNA-templated transcription [GO:0045893]	nucleus [GO:0005634]	DNA-binding transcription factor activity [GO:0003700]; RNA polymerase II cis-regulatory region sequence-specific DNA binding [GO:0000978]	YQPRVHVIRK	0.9395	-0.93179	0	0	0	9.06107	9.13317	0	0	0	0	0	0	0	0	0	0	0	0	0	0	0	0	0	0	0	0	0	0	0	0	0	0	0	0	0	0	0	0	0	0	0
A0A669D2C9	RING-type E3 ubiquitin transferase (EC 2.3.2.27)	UHRF2	Oreochromis niloticus (Nile tilapia) (Tilapia nilotica)	cell cycle [GO:0007049]; protein ubiquitination [GO:0016567]	nucleus [GO:0005634]	DNA binding [GO:0003677]; metal ion binding [GO:0046872]; transferase activity [GO:0016740]	TCLQRSFR	0.98626	-1.5929	0	0	0	0	0	0	0	0	0	0	0	0	0	0	0	0	0	0	0	0	0	0	0	0	0	0	0	0	0	0	0	0	0	0	0	0	0	0	0	0
A0A669D2F9	PH domain and leucine rich repeat protein phosphatase 1		Oreochromis niloticus (Nile tilapia) (Tilapia nilotica)				LGGSAALCHIR	0.95203	-1.3185	0	0	0	0	0	0	0	0	0	0	0	0	0	0	0	0	0	0	0	0	0	0	0	0	0	0	0	0	0	0	0	0	0	0	0	0	0	0	0	0
A0A669D2I3	Uncharacterized protein		Oreochromis niloticus (Nile tilapia) (Tilapia nilotica)	defense response to virus [GO:0051607]	extracellular region [GO:0005576]	cytokine receptor binding [GO:0005126]	QVSKSSAEDK	0.95131	-1.4307	0	0	0	0	0	0	0	0	0	0	0	0	0	0	0	0	0	0	0	0	0	0	0	0	0	0	0	0	0	0	0	0	0	0	0	0	0	0	0	0
A0A669D2M5	Adhesion G protein-coupled receptor B1	LOC100705251	Oreochromis niloticus (Nile tilapia) (Tilapia nilotica)	cell surface receptor signaling pathway [GO:0007166]	plasma membrane [GO:0005886]	G protein-coupled receptor activity [GO:0004930]	IMHTKKR	0.93192	-0.98403	0	0	0	0	0	0	0	0	0	0	0	0	0	0	0	0	0	0	0	0	0	0	0	0	0	0	0	0	0	0	0	0	0	0	0	0	0	0	0	0
A0A669D2Q8	Zinc finger and BTB domain containing 41		Oreochromis niloticus (Nile tilapia) (Tilapia nilotica)				TFDRAGKYESHTR	0.93992	-1.1163	0	0	0	9.48619	0	0	0	0	0	0	0	0	0	0	0	0	0	0	0	0	0	0	0	0	0	0	0	0	0	0	0	0	0	0	0	0	0	0	0	0
A0A669D2S8	DNA topoisomerase I (EC 5.6.2.1) (DNA topoisomerase 1)	LOC100697672	Oreochromis niloticus (Nile tilapia) (Tilapia nilotica)	DNA topological change [GO:0006265]	chromosome [GO:0005694]; nucleus [GO:0005634]	DNA binding [GO:0003677]; DNA topoisomerase type I (single strand cut, ATP-independent) activity [GO:0003917]	DQLRPLQILR	0.98873	-2.0479	0	0	0	9.95321	0	0	0	0	10.9912	0	0	0	0	0	0	0	0	0	0	0	0	0	0	0	0	0	0	0	0	0	0	0	0	0	0	0	0	0	0	0
A0A669D369	Nuclear factor of activated T-cells 5	LOC100691255	Oreochromis niloticus (Nile tilapia) (Tilapia nilotica)		cellular anatomical entity [GO:0110165]	DNA-binding transcription factor activity [GO:0003700]; RNA polymerase II cis-regulatory region sequence-specific DNA binding [GO:0000978]	STRARLVFR	0.93311	-0.95025	0	0	0	0	11.8951	0	0	0	0	0	0	0	0	0	0	0	0	0	0	0	0	0	0	0	0	0	0	0	0	0	0	0	0	0	0	0	0	0	0	0
A0A669D3G8	Pentraxin family member	LOC100712440	Oreochromis niloticus (Nile tilapia) (Tilapia nilotica)		extracellular region [GO:0005576]	metal ion binding [GO:0046872]	MFLHCCTK	0.95883	-1.4755	0	0	0	0	0	0	0	0	0	0	0	0	0	0	0	0	0	0	0	0	0	0	0	0	0	0	0	0	0	0	0	0	0	0	0	0	0	0	10.0303	0
A0A669D3M6	Ankyrin repeat and BTB/POZ domain-containing protein BTBD11-A	LOC100709613	Oreochromis niloticus (Nile tilapia) (Tilapia nilotica)				FLQDLGFRMLNCGRTDLVK	0.82319	-0.52657	0	0	0	0	0	0	0	0	0	0	0	0	9.0969	0	0	0	0	9.17488	0	0	0	0	0	0	0	0	0	0	0	0	0	0	0	0	0	0	0	0	0	0
A0A669D3R7	Aryl hydrocarbon receptor interacting protein-like 1		Oreochromis niloticus (Nile tilapia) (Tilapia nilotica)		cytoplasm [GO:0005737]; nucleus [GO:0005634]	peptidyl-prolyl cis-trans isomerase activity [GO:0003755]	TQLCDDERTVIDDSK	0.94403	-0.80111	0	0	0	0	0	0	0	0	0	9.64059	0	0	0	0	0	0	0	0	0	0	0	0	0	0	0	0	0	0	0	0	0	0	0	0	0	0	0	0	0	0
A0A669D3S9	Transgelin	LOC100708175	Oreochromis niloticus (Nile tilapia) (Tilapia nilotica)				DFSDEQLK	0	139.6	10.265	9.81618	8.21699	8.94237	0	0	11.1075	11.0995	11.164	0	0	0	0	0	0	8.56506	9.84337	9.83809	0	0	0	0	0	0	9.26108	9.98542	8.75999	0	0	0	0	0	0	0	0	0	0	0	0	0
A0A669D3T1	Metabotropic glutamate receptor 4	LOC100700221	Oreochromis niloticus (Nile tilapia) (Tilapia nilotica)		plasma membrane [GO:0005886]	G protein-coupled receptor activity [GO:0004930]	IGKDSQYEQEGK	0.99868	-2.4396	0	0	0	0	0	0	0	0	10.9432	0	0	0	0	0	0	0	0	0	0	0	0	0	0	0	0	0	0	0	0	0	0	0	0	0	0	0	0	0	0	0
A0A669D3T5	Protein serine kinase H1	pskh1	Oreochromis niloticus (Nile tilapia) (Tilapia nilotica)	protein phosphorylation [GO:0006468]	cytoplasm [GO:0005737]	ATP binding [GO:0005524]; protein serine/threonine kinase activity [GO:0004674]	IIARGSFTER	0.98529	-1.5944	0	0	0	0	10.3363	0	0	0	0	0	0	0	0	0	0	0	0	0	0	0	0	0	0	0	0	0	0	0	0	0	0	0	0	0	0	0	0	0	0	0
A0A669D405	Elongation factor 2	LOC100702471	Oreochromis niloticus (Nile tilapia) (Tilapia nilotica)	translation [GO:0006412]	cellular anatomical entity [GO:0110165]	GTP binding [GO:0005525]; GTPase activity [GO:0003924]	FSVSPVVR	0.99833	-2.335	9.09687	0	0	0	7.95501	7.97436	10.7223	10.1519	9.89937	0	0	0	0	0	0	0	0	0	0	0	0	0	0	0	0	0	0	0	0	0	0	0	0	0	0	0	0	0	0	0
A0A669D422	Methionine--tRNA ligase, cytoplasmic (EC 6.1.1.10) (Methionyl-tRNA synthetase)	mars1	Oreochromis niloticus (Nile tilapia) (Tilapia nilotica)	methionyl-tRNA aminoacylation [GO:0006431]		ATP binding [GO:0005524]; methionine-tRNA ligase activity [GO:0004825]	LLDLKKQLALAEGK	0.99852	-2.516	0	0	0	0	0	0	0	0	0	0	0	0	0	0	0	0	0	0	0	0	0	0	0	0	0	0	0	0	0	0	0	0	0	0	0	0	0	0	0	0
A0A669D473	Leucine-rich repeat-containing protein 32	LOC100708733	Oreochromis niloticus (Nile tilapia) (Tilapia nilotica)		membrane [GO:0016020]		ETLAHHTNLR	0.99297	-3.3983	0	9.43964	0	0	0	0	0	0	0	0	0	0	0	0	0	0	0	0	0	0	0	0	0	0	0	9.48545	0	0	0	0	0	0	0	0	0	0	0	0	0	0
A0A669D494	RCR-type E3 ubiquitin transferase (EC 2.3.2.33)		Oreochromis niloticus (Nile tilapia) (Tilapia nilotica)	protein ubiquitination [GO:0016567]; regulation of metabolic process [GO:0019222]	axon [GO:0030424]	metal ion binding [GO:0046872]	EDYSVVNR	0.95603	-1.4572	0	0	0	0	0	0	0	0	0	0	0	0	0	0	0	0	0	0	0	0	0	0	0	0	0	0	0	0	0	0	0	0	0	0	0	0	0	0	0	0
A0A669D4D3	Anion exchange protein		Oreochromis niloticus (Nile tilapia) (Tilapia nilotica)		membrane [GO:0016020]	solute:inorganic anion antiporter activity [GO:0005452]	NVPSQKRK	0.93654	-0.93806	0	0	0	0	0	0	0	0	0	0	0	0	0	0	0	0	0	0	0	0	0	0	0	0	0	0	0	0	0	0	0	0	0	0	0	0	0	0	0	0
A0A669D4E8	Polybromo 1		Oreochromis niloticus (Nile tilapia) (Tilapia nilotica)	chromatin remodeling [GO:0006338]	RSC-type complex [GO:0016586]	chromatin binding [GO:0003682]; DNA binding [GO:0003677]	VSVHLKAQRR	0.93486	-0.9133	0	0	0	0	0	0	0	0	0	0	0	0	0	0	0	0	0	0	0	0	0	0	0	0	0	0	0	0	0	0	0	0	0	0	0	10.9169	0	0	0	0
A0A669D4K1	Coiled-coil-helix-coiled-coil-helix domain containing 1	chchd1	Oreochromis niloticus (Nile tilapia) (Tilapia nilotica)	mitochondrial translation [GO:0032543]	mitochondrial ribosome [GO:0005761]		ATQGGIVFQEK	0.95083	-1.347	0	0	0	0	0	0	0	0	0	8.9888	0	0	0	0	0	0	0	0	0	0	0	0	0	0	0	0	0	0	0	0	0	0	0	0	0	0	0	0	0	0
A0A669D4L8	Phosphodiesterase (EC 3.1.4.-)	pde1b	Oreochromis niloticus (Nile tilapia) (Tilapia nilotica)	signal transduction [GO:0007165]		3',5'-cyclic-nucleotide phosphodiesterase activity [GO:0004114]; metal ion binding [GO:0046872]	KISLKNIK	0.93315	-0.95658	0	0	0	0	0	0	0	0	0	0	0	0	0	0	0	0	0	0	0	0	0	0	0	0	0	0	0	0	0	0	0	0	0	0	0	0	0	0	0	0
A0A669D4M1	RNA methyltransferase (EC 2.1.1.-)	LOC100690123	Oreochromis niloticus (Nile tilapia) (Tilapia nilotica)			O-methyltransferase activity [GO:0008171]; RNA methyltransferase activity [GO:0008173]	FQYGNYNK	0.95853	-1.4696	0	0	0	0	0	0	0	0	0	0	0	0	0	0	0	0	0	0	0	0	0	0	0	0	0	0	0	0	0	0	0	0	0	0	0	0	0	0	0	0
A0A669D502	Fem-1 homolog B	fem1b	Oreochromis niloticus (Nile tilapia) (Tilapia nilotica)				QNKTPLDK	0.97859	-1.5867	0	0	0	0	0	0	0	11.4899	0	0	0	0	0	0	0	0	0	0	0	0	0	0	0	0	0	0	0	0	0	0	0	0	0	0	0	0	0	0	0	0
A0A669D582	Glutamate receptor	grin2a	Oreochromis niloticus (Nile tilapia) (Tilapia nilotica)		NMDA selective glutamate receptor complex [GO:0017146]; postsynaptic membrane [GO:0045211]	ionotropic glutamate receptor activity [GO:0004970]; ligand-gated cation channel activity [GO:0099094]	EREWEKMGK	0.99801	-2.3805	0	0	0	0	0	0	0	9.19854	0	0	0	0	0	0	0	0	0	0	0	0	0	0	0	0	0	0	0	0	0	9.82993	0	0	0	0	0	0	0	0	0	0
A0A669D5D0	Protein turtle homolog A	LOC100709160	Oreochromis niloticus (Nile tilapia) (Tilapia nilotica)		membrane [GO:0016020]		GGETEIR	0.9885	-2.0192	12.1584	0	0	0	0	0	0	0	0	0	0	0	0	0	0	0	0	0	0	0	0	0	0	0	0	0	0	0	0	0	0	0	0	0	0	0	0	0	0	0
A0A669D5D1	PMS1 homolog 1, mismatch repair system component	pms1	Oreochromis niloticus (Nile tilapia) (Tilapia nilotica)	mismatch repair [GO:0006298]	mismatch repair complex [GO:0032300]; nucleus [GO:0005634]	ATP binding [GO:0005524]; ATP hydrolysis activity [GO:0016887]; ATP-dependent DNA damage sensor activity [GO:0140664]; mismatched DNA binding [GO:0030983]	SHMQGQKRK	0.93271	-0.95665	0	0	0	0	0	0	0	0	0	0	0	0	0	0	0	0	0	0	0	0	0	0	0	0	0	0	0	0	0	0	0	0	0	0	0	0	9.72006	0	0	0
A0A669D5E0	Diamine acetyltransferase 1	LOC100709878	Oreochromis niloticus (Nile tilapia) (Tilapia nilotica)	putrescine catabolic process [GO:0009447]		diamine N-acetyltransferase activity [GO:0004145]	FEEMEEK	0.99595	-2.6688	0	0	0	0	0	0	0	0	0	0	0	0	0	0	10.2303	0	0	0	0	0	0	0	0	0	0	0	0	0	0	0	0	0	0	0	0	0	0	0	0	0
A0A669D5E6	SEC24 homolog D, COPII coat complex component	sec24d	Oreochromis niloticus (Nile tilapia) (Tilapia nilotica)	endoplasmic reticulum to Golgi vesicle-mediated transport [GO:0006888]; intracellular protein transport [GO:0006886]	COPII vesicle coat [GO:0030127]; cytosol [GO:0005829]; endoplasmic reticulum membrane [GO:0005789]	zinc ion binding [GO:0008270]	NTLRLPATPVR	0.96139	-1.4986	0	0	0	0	11.5132	0	0	0	0	0	0	0	0	0	0	0	0	0	0	0	0	0	0	0	0	0	0	0	0	0	0	0	0	0	0	0	0	0	12.4891	0
A0A669D5K6	Disks large homolog 4	LOC100693164	Oreochromis niloticus (Nile tilapia) (Tilapia nilotica)		cell junction [GO:0030054]; membrane [GO:0016020]		RKPAAEKVTEIK	0.99109	-2.1247	11.7936	0	0	0	0	0	0	0	0	0	10.8508	0	0	0	0	0	0	0	0	0	0	0	0	0	0	0	0	0	0	0	9.25091	8.83156	0	0	0	0	0	0	0	0
A0A669D5N7	MAX network transcriptional repressor	mnt	Oreochromis niloticus (Nile tilapia) (Tilapia nilotica)			protein dimerization activity [GO:0046983]	EKLRLQHLK	0.99785	-2.4219	0	0	0	10.9772	0	0	0	9.65286	0	0	0	0	0	0	0	0	0	0	0	0	0	0	0	0	0	0	0	0	0	0	0	0	11.0325	10.4713	0	0	0	0	0	0
A0A669D5P0	Myosin-binding protein C, fast-type	LOC100699981	Oreochromis niloticus (Nile tilapia) (Tilapia nilotica)		membrane [GO:0016020]		GKWLDLGSKAGK	0.99803	-2.5286	10.4318	0	0	0	0	0	0	0	0	0	0	0	0	0	0	0	0	0	0	0	0	0	0	0	0	0	0	0	0	0	0	0	0	0	0	0	0	10.4914	0	0
A0A669D5P7	Signal-induced proliferation-associated 1	SIPA1	Oreochromis niloticus (Nile tilapia) (Tilapia nilotica)	regulation of small GTPase mediated signal transduction [GO:0051056]		GTPase activator activity [GO:0005096]	LKGWEKYR	0.9357	-0.95225	0	0	0	0	0	0	0	0	0	0	0	0	0	0	0	0	0	0	0	0	0	0	0	0	0	0	0	0	0	0	0	0	0	0	0	0	0	0	0	0
A0A669D5Q2	Cullin-associated and neddylation-dissociated 2 (putative)		Oreochromis niloticus (Nile tilapia) (Tilapia nilotica)	SCF complex assembly [GO:0010265]			LKNEITRLTAVR	0.94626	-0.84087	0	0	0	9.46064	0	0	0	0	0	0	0	0	0	0	0	0	0	0	0	0	0	0	0	0	0	0	0	0	0	0	0	0	0	0	0	0	0	0	0	0
A0A669D5W7	Ubiquitin associated and SH3 domain containing Ba		Oreochromis niloticus (Nile tilapia) (Tilapia nilotica)				MRLFVCR	0.98319	-1.6243	0	0	0	0	0	0	0	0	0	10.2827	0	0	0	0	0	0	0	0	0	0	0	0	0	0	0	0	0	0	0	0	0	0	0	0	0	0	0	0	0	0
A0A669D5X8	Pleiotrophin		Oreochromis niloticus (Nile tilapia) (Tilapia nilotica)	positive regulation of cell division [GO:0051781]	extracellular region [GO:0005576]	growth factor activity [GO:0008083]; heparin binding [GO:0008201]	IKVLLLI	0.98212	-1.5892	10.9008	0	0	0	0	0	0	0	0	0	0	0	0	0	0	0	9.51968	0	0	0	0	9.31773	0	0	0	9.19552	0	0	0	0	0	0	0	0	0	0	0	0	0	0
A0A669D5Y7	Extended synaptotagmin-2-A	LOC100697520	Oreochromis niloticus (Nile tilapia) (Tilapia nilotica)	endoplasmic reticulum-plasma membrane tethering [GO:0061817]; lipid transport [GO:0006869]	endoplasmic reticulum membrane [GO:0005789]; plasma membrane [GO:0005886]	lipid binding [GO:0008289]	LYLLPDKR	0.94285	-1.2164	0	0	0	0	0	0	0	0	0	0	0	0	0	0	0	0	0	0	0	0	0	0	0	0	0	0	0	0	0	0	0	9.75251	0	0	0	0	0	0	0	0
A0A669D616	DNA helicase (EC 3.6.4.12)	LOC100705962	Oreochromis niloticus (Nile tilapia) (Tilapia nilotica)		nucleus [GO:0005634]	ATP binding [GO:0005524]; ATP-dependent chromatin remodeler activity [GO:0140658]; DNA binding [GO:0003677]; helicase activity [GO:0004386]; hydrolase activity [GO:0016787]; metal ion binding [GO:0046872]	LKNNQSKFFR	0.95587	-1.3986	0	0	0	0	0	0	0	0	0	8.9888	0	0	0	0	0	0	0	0	0	0	0	0	0	0	0	0	0	0	0	0	0	0	0	0	0	0	0	0	0	0
A0A669D645	Lin-54 DREAM MuvB core complex component	lin54	Oreochromis niloticus (Nile tilapia) (Tilapia nilotica)		nucleus [GO:0005634]		FIITKTVNSK	0.99677	-2.1831	0	0	0	0	0	0	11.8807	0	0	0	0	0	0	0	0	0	0	0	0	0	0	0	0	0	0	0	0	0	0	0	0	0	0	0	0	0	0	0	0	0
A0A669D686	Phosphatase and actin regulator	phactr2	Oreochromis niloticus (Nile tilapia) (Tilapia nilotica)			actin binding [GO:0003779]; protein phosphatase inhibitor activity [GO:0004864]	LGNRPSKK	0.99418	-3.3531	0	0	0	0	0	0	0	0	0	0	0	0	0	0	0	0	0	0	0	0	0	0	0	0	0	0	0	0	0	0	0	0	13.0083	0	0	0	0	0	0	0
A0A669D6G5	Stromal antigen 2b		Oreochromis niloticus (Nile tilapia) (Tilapia nilotica)				LEKHLESLLR	0.98617	-1.602	0	0	0	0	0	0	0	0	0	0	0	0	0	0	0	0	0	0	0	0	0	0	0	0	0	0	0	0	0	0	0	0	0	0	0	0	0	0	0	0
A0A669D6L3	Reverse transcriptase domain-containing protein		Oreochromis niloticus (Nile tilapia) (Tilapia nilotica)				MKSRGDR	0.93167	-0.98403	0	0	0	0	0	0	0	0	0	0	0	0	0	0	0	0	0	0	0	0	0	0	0	0	0	0	0	0	0	0	0	0	0	0	0	0	0	0	0	0
A0A669D6L6	Neuropilin	LOC100695821	Oreochromis niloticus (Nile tilapia) (Tilapia nilotica)	angiogenesis [GO:0001525]; axon guidance [GO:0007411]; regulation of response to external stimulus [GO:0032101]	membrane [GO:0016020]	heparin binding [GO:0008201]; metal ion binding [GO:0046872]; semaphorin receptor activity [GO:0017154]; vascular endothelial growth factor receptor activity [GO:0005021]	DDSYDSQC	0.99245	-3.239	0	11.1539	11.0491	11.7347	11.9608	11.829	11.29	11.3343	0	11.39	9.21018	0	0	0	0	0	0	0	0	0	0	0	0	0	0	0	0	9.91994	0	0	9.62972	0	0	0	0	9.95873	10.1191	10.0558	10.2952	10.3935
A0A669D6M2	Reverse transcriptase domain-containing protein		Oreochromis niloticus (Nile tilapia) (Tilapia nilotica)			2-oxoglutarate-dependent dioxygenase activity [GO:0016706]; methyltransferase activity [GO:0008168]	NVRSLLNK	0.98585	-1.5929	0	0	0	0	0	0	0	0	0	0	0	0	0	0	0	0	0	0	0	0	0	0	0	0	0	0	0	0	0	0	0	0	0	0	0	0	0	0	0	0
A0A669D6Q2	Serine hydroxymethyltransferase (EC 2.1.2.1)	SHMT2	Oreochromis niloticus (Nile tilapia) (Tilapia nilotica)	glycine biosynthetic process from serine [GO:0019264]; tetrahydrofolate interconversion [GO:0035999]		glycine hydroxymethyltransferase activity [GO:0004372]; pyridoxal phosphate binding [GO:0030170]	LFFTLCRAFKAQR	0.99177	-2.1205	0	0	0	0	0	0	0	0	0	8.94994	0	0	0	0	0	0	0	0	0	0	0	0	0	0	0	0	0	0	0	0	0	0	0	0	0	0	0	0	0	0
A0A669D6Q5	Interferon-induced very large GTPase 1	LOC102080457	Oreochromis niloticus (Nile tilapia) (Tilapia nilotica)		cytoplasm [GO:0005737]; nucleus [GO:0005634]	GTP binding [GO:0005525]	ACKKLDDK	0.98834	-2.0279	0	0	0	0	0	0	0	0	0	0	0	0	0	0	0	0	0	0	0	0	0	0	0	0	0	0	0	0	0	0	0	0	0	0	0	0	0	0	0	0
A0A669D6T1	Integrin beta		Oreochromis niloticus (Nile tilapia) (Tilapia nilotica)	cell adhesion [GO:0007155]; integrin-mediated signaling pathway [GO:0007229]	cell periphery [GO:0071944]; membrane [GO:0016020]		IVRFMMRLK	0.9338	-1.0076	0	0	0	0	0	0	0	0	0	0	0	0	0	0	0	0	0	0	0	0	0	0	0	0	0	0	0	0	0	0	0	10.6104	0	0	0	0	0	0	0	0
A0A669D6T2	Contactin-associated protein-like 4	LOC100700197	Oreochromis niloticus (Nile tilapia) (Tilapia nilotica)	anatomical structure development [GO:0048856]; regulation of response to external stimulus [GO:0032101]	membrane [GO:0016020]		EAVYVWR	0.96042	-1.477	0	0	0	0	0	0	0	0	0	7.9786	0	0	0	0	0	0	0	0	0	0	0	0	0	0	0	0	0	0	0	0	0	0	0	0	0	0	0	0	0	0
A0A669D6Y7	Inositol 1,4,5-trisphosphate receptor	ITPR3	Oreochromis niloticus (Nile tilapia) (Tilapia nilotica)		endoplasmic reticulum membrane [GO:0005789]	inositol 1,4,5 trisphosphate binding [GO:0070679]; inositol 1,4,5-trisphosphate-sensitive calcium-release channel activity [GO:0005220]	NELLGGEQER	0.99985	-4.5151	0	0	0	0	0	0	0	0	0	0	0	0	0	0	0	0	0	0	0	0	0	0	0	0	0	0	0	0	0	0	0	0	0	0	0	0	10.5042	0	0	0
A0A669D7C3	Liprin-beta-2	LOC100700723	Oreochromis niloticus (Nile tilapia) (Tilapia nilotica)				QGHGGER	0.98258	-1.5892	0	0	0	0	0	0	0	0	0	0	0	0	0	0	0	0	0	0	0	0	0	0	0	0	0	0	0	0	0	0	0	0	0	0	0	0	0	0	0	0
A0A669D7I4	protein kinase C (EC 2.7.11.13)	pkn1	Oreochromis niloticus (Nile tilapia) (Tilapia nilotica)	protein phosphorylation [GO:0006468]; signal transduction [GO:0007165]	cytoplasm [GO:0005737]; nucleus [GO:0005634]	ATP binding [GO:0005524]; calcium-dependent protein kinase C activity [GO:0004698]; small GTPase binding [GO:0031267]	RNVDSQLR	0.9854	-1.7353	0	0	0	0	0	0	0	0	0	0	0	0	0	0	0	0	0	0	0	0	0	0	0	0	0	0	0	0	0	0	0	0	0	0	0	0	0	0	0	0
A0A669D7K0	Cryptochrome DASH	LOC100700256	Oreochromis niloticus (Nile tilapia) (Tilapia nilotica)	DNA repair [GO:0006281]		DNA photolyase activity [GO:0003913]	GPSHTPK	0.99329	-3.0745	0	0	0	0	0	0	0	0	0	0	0	0	0	0	0	0	0	0	0	0	0	0	0	0	0	0	0	0	0	0	0	0	0	0	0	12.6589	0	0	0	0
A0A669D7R5	SEA domain-containing protein		Oreochromis niloticus (Nile tilapia) (Tilapia nilotica)				VQQKPFGPK	0.92967	-1.0716	0	0	0	0	0	8.22173	0	0	0	0	0	0	0	0	0	0	0	0	0	0	0	0	0	0	0	0	0	0	0	0	0	0	0	0	0	0	0	0	0	0
A0A669D840	Cadherin-4	LOC100702438	Oreochromis niloticus (Nile tilapia) (Tilapia nilotica)	homophilic cell adhesion via plasma membrane adhesion molecules [GO:0007156]	plasma membrane [GO:0005886]	calcium ion binding [GO:0005509]	VIRICKDK	0.93608	-0.93806	0	0	0	0	0	0	0	0	0	0	0	0	0	0	0	0	0	0	0	0	0	0	0	0	0	0	0	0	0	0	0	0	0	0	0	0	0	0	0	0
A0A669D861	Collagen type II alpha 1 chain	COL2A1	Oreochromis niloticus (Nile tilapia) (Tilapia nilotica)			extracellular matrix structural constituent [GO:0005201]	GPPGERGAPGNR	0.97208	-1.5478	0	0	0	0	0	0	0	0	0	0	0	0	0	0	0	0	0	0	0	0	0	0	0	0	0	0	0	0	0	0	0	0	0	0	0	0	0	0	0	0
A0A669D8A4	C-Jun-amino-terminal kinase-interacting protein 4	SPAG9	Oreochromis niloticus (Nile tilapia) (Tilapia nilotica)		membrane [GO:0016020]	MAP-kinase scaffold activity [GO:0005078]	ITALMVSCNR	0.95173	-1.2702	0	0	0	0	0	0	0	0	0	0	0	0	0	0	0	0	0	0	0	0	0	0	0	0	0	0	0	0	0	0	0	0	0	0	0	0	0	0	0	0
A0A669D8A5	Succinate dehydrogenase [ubiquinone] iron-sulfur subunit, mitochondrial (EC 1.3.5.1)	LOC100712084	Oreochromis niloticus (Nile tilapia) (Tilapia nilotica)	tricarboxylic acid cycle [GO:0006099]	mitochondrial inner membrane [GO:0005743]	2 iron, 2 sulfur cluster binding [GO:0051537]; 3 iron, 4 sulfur cluster binding [GO:0051538]; 4 iron, 4 sulfur cluster binding [GO:0051539]; electron transfer activity [GO:0009055]; fumarate reductase (menaquinone) [GO:0102040]; metal ion binding [GO:0046872]; succinate dehydrogenase (ubiquinone) activity [GO:0008177]	DEYTEER	0.99884	-2.4395	0	0	0	0	0	0	0	0	0	0	0	0	0	0	0	0	0	0	0	0	0	0	0	0	0	0	0	0	0	10.1568	0	0	0	0	0	0	0	0	0	0
A0A669D8C6	Zinc finger protein 2 homolog	LOC100695519	Oreochromis niloticus (Nile tilapia) (Tilapia nilotica)				CNWESHLK	0.96	-1.4722	0	0	0	0	0	0	10.456	0	0	0	0	0	0	0	0	0	0	0	0	0	0	0	0	0	0	0	0	0	0	0	0	0	0	0	0	0	0	0	0	0
A0A669D8E2	Multidrug and toxin extrusion protein	LOC100703983	Oreochromis niloticus (Nile tilapia) (Tilapia nilotica)	xenobiotic detoxification by transmembrane export across the plasma membrane [GO:1990961]	membrane [GO:0016020]	antiporter activity [GO:0015297]; xenobiotic transmembrane transporter activity [GO:0042910]	TAEPVEDEGASWVR	0.9966	-2.1811	0	0	0	0	0	0	0	0	0	0	0	0	0	0	0	0	0	0	0	0	0	0	0	0	0	0	0	0	0	0	0	0	0	0	0	0	0	0	0	0
A0A669D8E7	Phosphatidylinositol-3,4,5-trisphosphate-dependent Rac exchange factor 1		Oreochromis niloticus (Nile tilapia) (Tilapia nilotica)	intracellular signal transduction [GO:0035556]			FYADEETEGTGTKSKQLQR	0.94052	-0.74317	0	0	0	0	0	0	0	0	0	0	0	0	0	0	0	0	0	0	0	0	0	0	0	0	0	0	0	0	0	0	0	0	0	0	0	0	0	0	0	0
A0A669D8F5	Integrase catalytic domain-containing protein		Oreochromis niloticus (Nile tilapia) (Tilapia nilotica)	DNA integration [GO:0015074]		nucleic acid binding [GO:0003676]	NGKEDAK	0.983	-1.6243	0	0	0	0	0	0	0	0	0	0	0	0	0	0	0	0	0	0	0	0	0	0	0	0	0	0	0	0	0	0	0	0	0	0	0	0	0	11.6524	0	0
A0A669D8J6	F-BAR domain only protein 2	fcho2	Oreochromis niloticus (Nile tilapia) (Tilapia nilotica)		clathrin-coated pit [GO:0005905]		DKDTDSTCVNK	0.98758	-1.8396	0	0	0	0	0	0	0	0	0	0	0	0	0	0	0	0	0	0	0	0	0	0	0	0	0	0	0	0	0	0	0	0	0	0	0	0	0	0	0	0
A0A669D8T2	Interleukin 6 signal transducer	il6st	Oreochromis niloticus (Nile tilapia) (Tilapia nilotica)		membrane [GO:0016020]	cytokine receptor activity [GO:0004896]	NTKYDIWIK	0.99848	-2.209	0	0	0	0	0	0	0	0	0	0	0	0	0	0	0	0	0	0	0	0	0	0	0	0	0	0	0	0	0	0	0	0	0	0	0	0	0	0	0	9.43883
A0A669D8W0	Spectrin beta chain, non-erythrocytic 4	LOC100709524	Oreochromis niloticus (Nile tilapia) (Tilapia nilotica)			phospholipid binding [GO:0005543]	LDSLLTK	0.94315	-1.123	0	0	0	0	0	9.71051	0	10.5543	10.4746	0	0	0	0	0	0	0	0	0	0	0	0	0	0	0	0	0	0	0	0	0	0	0	0	0	0	0	0	0	0	0
A0A669D8W5	Iroquois homeobox 2	irx2	Oreochromis niloticus (Nile tilapia) (Tilapia nilotica)		nucleus [GO:0005634]	DNA binding [GO:0003677]; DNA-binding transcription factor activity, RNA polymerase II-specific [GO:0000981]	AWLQEHRK	0.99595	-2.6814	9.09297	0	0	8.6283	8.72431	8.58097	0	0	0	8.97413	0	0	0	0	0	0	0	0	0	0	0	0	0	0	0	0	0	0	0	0	0	0	0	0	0	0	0	0	0	0
A0A669D8X1	Coiled-coil domain containing 88A	CCDC88A	Oreochromis niloticus (Nile tilapia) (Tilapia nilotica)				KTLVTLR	0.99361	-3.5339	0	0	0	0	0	0	0	0	0	0	0	0	0	0	0	0	0	0	0	0	0	0	0	0	0	0	0	0	0	0	0	0	0	0	0	0	0	0	0	0
A0A669D908	EMAP like 1	eml1	Oreochromis niloticus (Nile tilapia) (Tilapia nilotica)				TPNFSIQLR	0.96218	-1.4866	0	0	0	0	0	0	0	9.36175	0	0	0	0	0	0	0	0	0	0	0	0	0	0	0	0	0	0	0	0	0	0	0	0	0	0	0	0	0	0	0	0
A0A669D959	Transcription factor HES-7	LOC100700632	Oreochromis niloticus (Nile tilapia) (Tilapia nilotica)			protein dimerization activity [GO:0046983]	VPKQPQK	0.9828	-1.6243	0	0	0	12.022	9.26496	0	0	0	0	11.1838	10.5736	10.577	11.8823	0	0	0	0	13.0475	0	11.5187	11.3486	0	0	0	0	12.656	12.7839	0	0	10.0736	11.5156	11.7911	11.6532	0	11.2922	0	12.2747	0	0	9.99138
A0A669D971	ADP-ribosylation factor-like 4D		Oreochromis niloticus (Nile tilapia) (Tilapia nilotica)			GTP binding [GO:0005525]; GTPase activity [GO:0003924]	LYEMILKRK	0.93129	-1.0109	0	0	0	0	0	0	0	0	0	0	0	0	0	0	0	0	0	0	0	0	0	0	0	0	0	0	0	0	0	0	0	0	0	0	0	0	0	12.8526	0	0
A0A669D973	Target of EGR1, exonuclease	toe1	Oreochromis niloticus (Nile tilapia) (Tilapia nilotica)			metal ion binding [GO:0046872]; nucleic acid binding [GO:0003676]	AAPLNVVK	0.95844	-1.4711	0	0	12.1158	0	0	0	0	0	0	0	0	0	0	0	0	0	0	0	0	0	0	0	0	0	0	0	0	0	0	0	0	0	0	0	0	0	0	0	0	0
A0A669D986	Ryanodine receptor 1b (skeletal)		Oreochromis niloticus (Nile tilapia) (Tilapia nilotica)	cellular calcium ion homeostasis [GO:0006874]	sarcoplasmic reticulum membrane [GO:0033017]	calmodulin binding [GO:0005516]; ryanodine-sensitive calcium-release channel activity [GO:0005219]	FPQMVTSCCRFLCYFCR	0.99388	-3.3869	0	0	0	0	0	0	0	0	0	0	0	0	0	0	0	0	0	0	0	0	0	0	0	0	0	0	0	0	0	0	0	0	0	0	0	0	0	0	0	0
A0A669D9D8	Lysosomal trafficking regulator		Oreochromis niloticus (Nile tilapia) (Tilapia nilotica)				EVQSVSLESSAFR	0.99374	-3.0604	0	0	0	0	0	0	0	0	0	0	0	0	0	0	0	0	0	0	0	0	0	0	0	0	0	0	0	0	0	0	0	0	0	0	0	10.6746	0	0	0	0
A0A669D9I2	von Willebrand factor A domain-containing protein 7	LOC102079154	Oreochromis niloticus (Nile tilapia) (Tilapia nilotica)				TTDKNYFK	0.97912	-1.5601	0	0	0	0	0	0	0	0	0	0	0	0	0	0	0	0	0	0	0	0	0	0	0	0	0	0	0	0	0	0	0	0	0	0	0	0	0	0	0	0
A0A669D9M5	Plexin-C1	LOC100690065	Oreochromis niloticus (Nile tilapia) (Tilapia nilotica)	axon guidance [GO:0007411]	membrane [GO:0016020]	semaphorin receptor activity [GO:0017154]	GPVDCVTEK	0.9949	-2.8431	0	0	0	0	0	0	0	0	0	0	0	0	0	0	0	0	0	0	0	0	0	0	0	0	0	0	0	0	0	0	0	0	0	0	0	0	0	0	0	0
A0A669D9R3	Plexin b2b		Oreochromis niloticus (Nile tilapia) (Tilapia nilotica)	axon guidance [GO:0007411]	plasma membrane [GO:0005886]	semaphorin receptor activity [GO:0017154]	HFFFLQIK	0.96273	-1.4803	0	0	0	0	0	0	0	0	0	0	0	0	0	0	0	0	0	0	0	0	0	0	0	0	0	0	0	0	0	0	0	0	0	0	0	0	0	0	0	0
A0A669D9S8	Oxysterol-binding protein	LOC100712257	Oreochromis niloticus (Nile tilapia) (Tilapia nilotica)	lipid transport [GO:0006869]		lipid binding [GO:0008289]	LISEQVSHHPPVSAFHAEGLK	0.41667	-0.46876	11.3186	0	0	0	0	9.9993	11.2628	0	0	0	0	0	0	0	0	0	0	0	0	0	0	0	0	0	0	0	0	0	0	0	0	0	0	0	0	0	0	0	0	0
A0A669D9U8	Myosin ID	MYO1D	Oreochromis niloticus (Nile tilapia) (Tilapia nilotica)	system development [GO:0048731]	myosin complex [GO:0016459]	actin binding [GO:0003779]; ATP binding [GO:0005524]; cytoskeletal motor activity [GO:0003774]	RFEEALK	0.98623	-1.767	0	0	9.11562	0	0	0	0	0	0	0	0	0	0	0	0	0	0	0	0	0	0	0	0	0	0	0	0	0	0	0	0	0	0	0	0	0	0	0	0	0
A0A669D9Y7	Progestin and adipoQ receptor family member 9	PAQR9	Oreochromis niloticus (Nile tilapia) (Tilapia nilotica)		membrane [GO:0016020]		VIENFILTGYR	0.94821	-1.2987	0	8.57323	0	0	0	0	0	0	0	0	0	0	0	0	0	0	0	0	0	0	0	0	0	0	0	0	0	0	0	0	0	0	0	0	0	0	0	0	0	0
A0A669DA17	NACHT domain-containing protein		Oreochromis niloticus (Nile tilapia) (Tilapia nilotica)				LLVGLLGQTKTIQR	0.99832	-2.2758	0	0	0	0	0	0	0	0	0	0	0	0	0	0	0	0	0	0	0	0	0	0	0	0	0	0	0	0	0	0	0	0	0	0	10.7228	0	0	0	0	0
A0A669DA30	Bucky ball		Oreochromis niloticus (Nile tilapia) (Tilapia nilotica)				VVVRKHSSPR	0.93019	-1.0135	0	0	0	0	0	0	0	0	0	0	0	0	0	0	0	0	0	0	0	0	0	0	0	0	0	0	0	0	0	0	0	0	0	0	0	0	0	0	0	0
A0A669DA36	L1 transposable element RRM domain-containing protein		Oreochromis niloticus (Nile tilapia) (Tilapia nilotica)				NIVYSLR	0.99701	-1.5073	0	0	0	0	0	0	0	0	0	0	0	0	0	0	0	0	0	0	0	0	0	0	0	0	0	0	0	0	0	0	0	0	0	0	0	0	0	0	0	0
A0A669DA65	Tensin-3	TNS3	Oreochromis niloticus (Nile tilapia) (Tilapia nilotica)				GLSSREAVQR	0.92955	-0.62405	0	0	0	0	0	0	0	8.56731	0	0	0	0	0	0	0	0	0	0	0	0	0	0	0	0	0	0	0	0	0	0	0	0	0	0	0	0	0	0	0	0
A0A669DAQ0	Reverse transcriptase domain-containing protein		Oreochromis niloticus (Nile tilapia) (Tilapia nilotica)				LEHCVSLK	0.66456	-0.50288	9.86225	9.44568	9.38666	9.66752	10.4527	0	11.0872	10.8212	10.7834	0	0	0	0	0	0	9.4937	9.26179	9.03963	0	0	0	0	0	0	0	0	0	0	0	0	0	0	0	0	0	0	0	0	0	0
A0A669DAR2	GPI ethanolamine phosphate transferase 1 (EC 2.-.-.-)	pign	Oreochromis niloticus (Nile tilapia) (Tilapia nilotica)	GPI anchor biosynthetic process [GO:0006506]	endoplasmic reticulum membrane [GO:0005789]	mannose-ethanolamine phosphotransferase activity [GO:0051377]	GTWGVSHTR	0.97115	-1.5309	0	0	8.3651	0	0	0	0	0	0	0	0	0	0	0	0	0	0	0	0	0	0	0	0	0	0	0	0	0	0	0	0	0	0	0	0	0	0	0	0	0
A0A669DAV4	Golgi brefeldin A resistant guanine nucleotide exchange factor 1		Oreochromis niloticus (Nile tilapia) (Tilapia nilotica)	regulation of ARF protein signal transduction [GO:0032012]	Golgi apparatus [GO:0005794]	guanyl-nucleotide exchange factor activity [GO:0005085]	LPGEAPVIQR	0.95447	-1.4413	0	0	10.1888	0	0	0	0	0	0	0	0	0	0	0	0	0	0	0	0	0	0	0	0	0	0	0	0	0	0	0	0	0	0	0	0	0	0	0	0	0
A0A669DAW6	Kinesin light chain	LOC100706691	Oreochromis niloticus (Nile tilapia) (Tilapia nilotica)		cytoplasm [GO:0005737]; kinesin complex [GO:0005871]; microtubule [GO:0005874]		NGGNDPK	1.0073	-1.5073	0	0	0	0	0	9.73912	0	0	0	0	0	0	0	0	0	0	0	0	0	0	0	0	0	0	0	0	0	0	0	0	0	0	0	0	0	0	0	0	0	0
A0A669DAW9	ribonuclease H (EC 3.1.26.4)		Oreochromis niloticus (Nile tilapia) (Tilapia nilotica)	DNA integration [GO:0015074]		nucleic acid binding [GO:0003676]	TDKVKHHIK	0.94029	-0.93152	0	0	0	0	0	0	0	0	0	0	0	0	0	0	0	0	0	0	0	0	0	0	0	0	0	0	0	0	0	0	0	10.7923	0	0	0	0	0	0	0	0
A0A669DB23	Collectin subfamily member 10	COLEC10	Oreochromis niloticus (Nile tilapia) (Tilapia nilotica)				GQNGTMCDCGR	0.97606	-1.5686	0	0	0	0	0	0	0	0	0	0	0	0	0	0	0	0	0	0	0	0	0	0	0	0	0	0	0	0	0	0	0	0	0	0	0	0	0	0	0	0
A0A669DB50	Acyl-coenzyme A thioesterase 5	LOC102079261	Oreochromis niloticus (Nile tilapia) (Tilapia nilotica)				GVGIMSRCK	0.95405	-1.4599	0	0	0	0	0	0	0	0	0	0	0	0	0	0	0	0	0	0	0	0	0	0	0	0	0	0	0	0	0	0	0	0	0	0	0	0	0	0	0	0
A0A669DB99	Uncharacterized LOC102081035	LOC102081035	Oreochromis niloticus (Nile tilapia) (Tilapia nilotica)			signaling receptor binding [GO:0005102]	IEGHGDR	1.0084	-1.5073	0	10.2767	0	0	0	0	10.6967	0	0	0	0	0	0	0	0	0	0	0	0	0	0	0	0	0	0	0	0	0	0	0	0	0	0	0	0	0	9.62436	0	0	0
A0A669DBA9	Pumilio RNA binding family member 3	pum3	Oreochromis niloticus (Nile tilapia) (Tilapia nilotica)			RNA binding [GO:0003723]	LMLTDELYGNTYTVCK	0.97136	-1.5306	0	0	0	0	0	0	0	0	0	0	0	0	0	0	0	0	9.71382	0	0	0	0	0	0	0	0	0	0	0	0	0	0	0	0	0	0	0	0	0	0	0
A0A669DBC3	ribonuclease H (EC 3.1.26.4)		Oreochromis niloticus (Nile tilapia) (Tilapia nilotica)				TMKEHDDNLR	0.9721	-1.5484	0	0	0	0	0	0	0	0	0	0	0	0	0	0	0	0	0	0	0	0	0	0	0	0	0	0	0	0	0	0	0	0	0	0	0	0	0	0	0	0
A0A669DBD4	Ubiquinol-cytochrome c reductase, complex III subunit XI		Oreochromis niloticus (Nile tilapia) (Tilapia nilotica)	mitochondrial electron transport, ubiquinol to cytochrome c [GO:0006122]	mitochondrial respiratory chain complex III [GO:0005750]		MVQKILNK	0.98605	-1.5929	0	0	0	0	0	0	0	0	0	0	0	0	0	0	0	0	0	0	0	0	0	0	0	0	0	0	0	9.02976	0	0	0	0	0	0	0	0	0	0	0	0
A0A669DBJ8	Glutamate decarboxylase 1a		Oreochromis niloticus (Nile tilapia) (Tilapia nilotica)	carboxylic acid metabolic process [GO:0019752]		carboxy-lyase activity [GO:0016831]; pyridoxal phosphate binding [GO:0030170]	GMAAAPR	0.98757	-1.8372	0	0	0	0	0	0	11.7404	12.0565	12.1418	12.4941	11.2108	0	0	10.3983	10.4528	10.8771	0	10.9241	9.6241	9.70672	9.86178	9.92711	10.0108	9.80484	9.68078	9.75039	0	11.1176	11.3828	0	11.6391	11.6027	11.4046	10.7068	10.8043	10.9133	11.0795	11.0362	11.1343	11.2266
A0A669DBP0	Intraflagellar transport 172		Oreochromis niloticus (Nile tilapia) (Tilapia nilotica)				KQKGVEDNK	0.99815	-2.2446	0	0	0	0	0	0	0	0	0	0	0	0	0	0	0	0	0	0	0	0	0	0	0	0	0	0	8.86981	0	0	0	0	0	0	0	0	0	0	0	0	0
A0A669DBP5	Zinc finger protein 501	LOC100710048	Oreochromis niloticus (Nile tilapia) (Tilapia nilotica)				RHMALHK	0.98608	-1.767	0	0	0	0	0	0	0	0	8.82002	0	0	0	0	0	0	0	0	0	0	0	0	0	0	0	0	0	0	0	0	0	0	0	0	0	0	0	0	0	0	0
A0A669DBP7	CDP-diacylglycerol--glycerol-3-phosphate 3-phosphatidyltransferase (EC 2.7.8.5)	pgs1	Oreochromis niloticus (Nile tilapia) (Tilapia nilotica)	cardiolipin biosynthetic process [GO:0032049]; lipid catabolic process [GO:0016042]	mitochondrion [GO:0005739]	ATP binding [GO:0005524]; CDP-diacylglycerol-glycerol-3-phosphate 3-phosphatidyltransferase activity [GO:0008444]	TMLLPLLQR	0.99088	-2.0977	0	0	0	0	0	0	0	0	0	0	0	0	0	0	0	0	0	0	0	0	0	0	0	0	0	0	0	0	0	0	0	0	0	0	9.43838	0	0	0	0	0
A0A669DBR4	protein kinase C (EC 2.7.11.13)	LOC100703205	Oreochromis niloticus (Nile tilapia) (Tilapia nilotica)	cell development [GO:0048468]; protein phosphorylation [GO:0006468]	cytoplasm [GO:0005737]	ATP binding [GO:0005524]; calcium-dependent protein kinase C activity [GO:0004698]; metal ion binding [GO:0046872]	CDHCMMNIHK	0.99555	-2.9038	0	0	0	0	0	0	0	0	0	0	0	0	0	0	0	0	0	0	0	0	0	0	0	0	0	0	0	0	0	0	8.69857	0	0	0	0	0	0	0	0	0
A0A669DBR8	Cyclin D1	ccnd1	Oreochromis niloticus (Nile tilapia) (Tilapia nilotica)	cell division [GO:0051301]	cytoplasm [GO:0005737]; nucleus [GO:0005634]		FLSVEATR	0.95916	-1.4678	0	0	0	0	0	0	0	0	0	0	0	0	0	0	0	0	0	0	0	0	0	0	0	0	0	0	0	0	0	0	0	0	0	0	0	0	0	0	0	0
A0A669DBR9	Uncharacterized protein		Oreochromis niloticus (Nile tilapia) (Tilapia nilotica)				NVENQLHK	0.95994	-1.4732	0	0	0	0	0	0	0	0	0	0	0	0	0	0	0	0	0	0	0	0	0	0	0	0	0	0	0	0	0	0	10.3272	0	0	0	0	0	0	0	0	0
A0A669DBV2	Interferon-induced very large GTPase 1	LOC102077686	Oreochromis niloticus (Nile tilapia) (Tilapia nilotica)		cytoplasm [GO:0005737]; nucleus [GO:0005634]	GTP binding [GO:0005525]	IHKQLFHLK	0.99679	-2.2192	0	0	0	0	10.7343	10.6432	0	0	0	0	0	0	0	0	0	0	0	0	0	0	0	0	0	0	0	0	0	0	0	0	0	0	0	0	0	0	0	0	0	0
A0A669DC13	Reverse transcriptase domain-containing protein		Oreochromis niloticus (Nile tilapia) (Tilapia nilotica)			catalytic activity [GO:0003824]	KELEMALKK	0.994	-2.971	0	0	0	0	0	0	0	0	0	0	0	0	0	0	0	0	0	0	0	0	0	0	0	0	0	0	0	0	0	0	0	0	0	0	0	0	10.0892	0	0	0
A0A669DC70	Fucolectin tachylectin-4 pentraxin-1 domain-containing protein		Oreochromis niloticus (Nile tilapia) (Tilapia nilotica)	regulation of cellular defense response [GO:0010185]; regulation of complement activation, lectin pathway [GO:0001868]		fucose binding [GO:0042806]	GFLGQRFGSGTR	0.98878	-1.9721	0	0	0	0	0	0	0	0	0	0	0	0	0	0	0	0	0	0	0	0	0	0	0	0	0	0	0	0	0	0	0	0	0	0	0	0	0	0	0	0
A0A669DC84	Phospholipase A1 member A	pla1a	Oreochromis niloticus (Nile tilapia) (Tilapia nilotica)	lipid metabolic process [GO:0006629]	extracellular region [GO:0005576]	lipase activity [GO:0016298]; metal ion binding [GO:0046872]	ITGLDPAGPMFKGADTYSR	0.40171	-0.45703	0	0	0	9.255	0	0	0	9.86927	0	0	0	0	0	0	0	0	0	0	0	0	0	0	0	0	0	0	0	0	0	0	0	0	0	0	0	0	0	0	0	0
A0A669DCA0	Cocaine- and amphetamine-regulated transcript protein	LOC102079351	Oreochromis niloticus (Nile tilapia) (Tilapia nilotica)				RGSIPLCNYR	0.95668	-1.3929	0	0	0	0	0	0	0	0	0	0	0	0	0	0	0	0	0	0	0	0	0	0	0	0	0	0	0	0	0	0	0	0	0	0	0	0	0	0	0	0
A0A669DCA6	FAM20A golgi associated secretory pathway pseudokinase		Oreochromis niloticus (Nile tilapia) (Tilapia nilotica)		Golgi apparatus [GO:0005794]		AMFKPMR	0.99358	-3.3888	0	0	0	0	0	0	0	0	0	0	0	0	0	0	0	0	0	0	0	0	0	0	0	0	0	0	0	0	0	0	0	0	0	0	0	0	0	0	0	0
A0A669DCA8	Myosin heavy chain 11	myh11	Oreochromis niloticus (Nile tilapia) (Tilapia nilotica)	system development [GO:0048731]	myosin complex [GO:0016459]	actin binding [GO:0003779]; ATP binding [GO:0005524]; cytoskeletal motor activity [GO:0003774]	ATAARRK	0.99786	-2.4969	0	0	0	0	0	0	0	0	0	0	0	0	0	0	0	0	0	0	0	0	0	0	0	0	0	0	0	0	11.157	11.8032	0	0	0	0	0	0	0	0	0	0
A0A669DCA9	E3 ubiquitin/ISG15 ligase TRIM25	LOC106098454	Oreochromis niloticus (Nile tilapia) (Tilapia nilotica)			metal ion binding [GO:0046872]	GYAPSEK	1.0081	-1.5073	0	0	0	0	0	0	0	0	0	0	0	0	0	0	0	0	0	0	0	0	0	0	0	0	0	0	0	0	0	0	0	0	0	0	0	0	0	0	0	0
A0A669DCD2	Ro60, Y RNA binding protein	ro60	Oreochromis niloticus (Nile tilapia) (Tilapia nilotica)		cytoplasm [GO:0005737]	RNA binding [GO:0003723]	RFAQDGR	0.98656	-1.767	0	0	0	0	0	0	0	0	0	0	0	0	0	0	0	0	9.92181	9.62735	0	0	0	0	0	0	0	0	0	0	0	0	0	0	0	0	0	0	0	0	0	0
A0A669DCD8	Cofilin-2	LOC100699342	Oreochromis niloticus (Nile tilapia) (Tilapia nilotica)	actin filament depolymerization [GO:0030042]	actin cytoskeleton [GO:0015629]	actin binding [GO:0003779]	ASGVTVNDEVIR	0	51.855	0	0	0	0	0	0	0	0	0	0	0	0	0	0	0	0	0	0	0	0	0	0	0	0	0	0	0	0	0	0	0	0	0	0	0	0	0	0	0	0
A0A669DCG4	ABRA C-terminal like	heca	Oreochromis niloticus (Nile tilapia) (Tilapia nilotica)				IVCIKCKSR	0.98854	-1.9085	0	9.19244	0	10.0079	0	0	8.71644	0	0	0	0	0	0	0	0	0	0	0	0	0	0	0	0	0	0	0	0	0	0	0	0	0	0	0	0	0	0	0	0	0
A0A669DCH1	MAX dimerization protein 4	mxd4	Oreochromis niloticus (Nile tilapia) (Tilapia nilotica)			protein dimerization activity [GO:0046983]	AKMHIKK	0.9893	-1.9681	0	0	0	0	0	0	0	0	0	0	0	0	0	0	0	0	0	0	0	0	0	0	0	0	0	0	0	0	0	0	0	0	0	0	0	0	0	0	0	0
A0A669DD29	Ataxin 7 like 1	ATXN7L1	Oreochromis niloticus (Nile tilapia) (Tilapia nilotica)				LALQNMVEK	0.95857	-1.4699	0	0	0	0	0	0	0	0	0	0	0	0	0	0	0	0	0	0	0	0	0	0	0	0	0	0	0	0	0	0	0	0	0	0	0	0	0	0	0	0
A0A669DD40	ATP-dependent DNA helicase (EC 3.6.4.12)	LOC109202971	Oreochromis niloticus (Nile tilapia) (Tilapia nilotica)	DNA recombination [GO:0006310]; DNA repair [GO:0006281]; telomere maintenance [GO:0000723]		ATP binding [GO:0005524]; DNA helicase activity [GO:0003678]; hydrolase activity [GO:0016787]	QKYASNKEYK	0.99749	-2.3234	0	0	0	0	0	0	0	0	0	0	0	0	0	0	0	0	0	0	0	0	0	0	0	0	0	0	0	0	0	0	0	10.6858	0	0	0	0	0	0	0	0
A0A669DDC9	CCHC-type domain-containing protein		Oreochromis niloticus (Nile tilapia) (Tilapia nilotica)			nucleic acid binding [GO:0003676]; zinc ion binding [GO:0008270]	AQLELEIRR	0.9856	-1.7353	0	0	0	0	0	0	0	0	0	0	0	0	0	0	0	0	0	0	0	0	0	0	0	0	0	0	0	0	0	0	0	0	0	0	0	0	0	0	0	0
A0A669DDF4	receptor protein-tyrosine kinase (EC 2.7.10.1)	LOC100700380	Oreochromis niloticus (Nile tilapia) (Tilapia nilotica)		plasma membrane [GO:0005886]	ATP binding [GO:0005524]; ephrin receptor activity [GO:0005003]	DCNTFGGASVACK	0.99662	-2.2292	0	0	0	0	0	0	0	0	10.3164	0	0	0	8.60622	0	0	0	0	0	0	0	0	0	0	0	0	0	0	0	0	0	0	0	0	0	0	0	0	0	0	0
A0A669DDK6	Ectonucleoside triphosphate diphosphohydrolase 7	ENTPD7	Oreochromis niloticus (Nile tilapia) (Tilapia nilotica)		membrane [GO:0016020]	ATP binding [GO:0005524]; hydrolase activity [GO:0016787]	IHQREQR	0.98316	-1.6243	0	0	0	0	0	0	0	0	0	0	0	0	0	0	0	0	0	0	0	0	0	0	0	0	0	0	0	0	0	0	0	0	0	0	0	0	0	0	0	0
A0A669DDQ0	PKS_AT domain-containing protein		Oreochromis niloticus (Nile tilapia) (Tilapia nilotica)			transferase activity [GO:0016740]	GLLKYPNVK	0.98472	-1.5905	0	0	0	0	0	0	0	0	0	0	0	0	0	0	0	0	0	0	0	0	0	0	0	0	0	0	0	0	11.6476	0	0	0	0	0	0	0	0	0	0	0
A0A669DDT8	Protein Shroom1	LOC102078750	Oreochromis niloticus (Nile tilapia) (Tilapia nilotica)		cytoplasm [GO:0005737]; microtubule [GO:0005874]	actin filament binding [GO:0051015]	EPEIVGQK	0.98889	-2.0433	0	0	0	0	0	0	0	0	0	0	0	0	0	0	0	0	0	0	0	0	0	0	0	0	0	0	0	0	0	0	0	0	0	0	0	0	0	0	0	0
A0A669DE73	Slit homolog 2 (Drosophila)		Oreochromis niloticus (Nile tilapia) (Tilapia nilotica)	cell development [GO:0048468]; cellular component organization [GO:0016043]; nervous system development [GO:0007399]	extracellular region [GO:0005576]	calcium ion binding [GO:0005509]	CGCTKCSL	0.99343	-3.4036	0	0	0	0	0	0	0	0	0	0	0	0	0	0	0	0	0	0	0	0	0	0	0	0	0	0	0	0	11.1201	0	0	0	0	0	0	0	0	0	0	0
A0A669DE80	Major facilitator superfamily domain containing 10	mfsd10	Oreochromis niloticus (Nile tilapia) (Tilapia nilotica)		membrane [GO:0016020]	transmembrane transporter activity [GO:0022857]	VSCGDCR	1.0038	-1.5073	12.9423	0	0	13.6858	0	0	0	0	0	0	0	0	0	0	0	0	0	0	0	0	0	0	0	0	0	0	0	0	0	0	0	0	0	0	0	0	0	0	0	0
A0A669DE90	Uncharacterized protein		Oreochromis niloticus (Nile tilapia) (Tilapia nilotica)				CLTDNNGLSSSSSALTK	0.94439	-0.85139	0	0	0	0	0	0	0	0	0	0	0	0	0	0	0	0	0	0	0	0	0	0	0	0	0	0	0	0	0	0	0	0	0	0	0	0	0	0	0	0
A0A669DE95	Ubiquitin conjugating enzyme E2 R2	ube2r2	Oreochromis niloticus (Nile tilapia) (Tilapia nilotica)			ATP binding [GO:0005524]; transferase activity [GO:0016740]	EYAEIIR	1.0005	-1.5073	0	0	0	0	0	0	0	0	0	0	0	0	0	0	0	0	0	0	0	0	0	0	0	0	0	0	0	0	10.0488	0	0	0	0	0	0	0	0	0	0	0
A0A669DE99	Slit homolog 1b (Drosophila)		Oreochromis niloticus (Nile tilapia) (Tilapia nilotica)	animal organ development [GO:0048513]; cell development [GO:0048468]; cellular component organization [GO:0016043]; nervous system development [GO:0007399]	extracellular region [GO:0005576]	calcium ion binding [GO:0005509]	MMLRNNK	0.98338	-1.6243	0	0	0	0	0	0	0	0	0	0	0	0	0	0	0	0	0	0	0	0	0	0	0	0	0	0	0	0	0	0	0	0	0	0	0	0	0	0	0	0
A0A669DEC0	Calcium voltage-gated channel auxiliary subunit alpha2delta 2	cacna2d2	Oreochromis niloticus (Nile tilapia) (Tilapia nilotica)	regulation of ion transmembrane transport [GO:0034765]	membrane [GO:0016020]	calcium channel activity [GO:0005262]; voltage-gated ion channel activity [GO:0005244]	YGSTLAR	1.0003	-1.5073	0	13.2679	0	0	0	15.0058	0	0	0	0	0	0	0	0	0	0	0	0	0	0	0	0	0	0	0	0	0	12.7524	0	0	0	0	0	0	0	0	0	0	0	0
A0A669DED5	La-related protein 7 (La ribonucleoprotein domain family member 7)		Oreochromis niloticus (Nile tilapia) (Tilapia nilotica)	mRNA processing [GO:0006397]; RNA splicing [GO:0008380]	nucleoplasm [GO:0005654]; ribonucleoprotein complex [GO:1990904]	RNA binding [GO:0003723]	SSMSALK	0.98645	-1.5073	0	0	0	0	0	0	0	0	0	0	0	0	0	0	0	0	0	0	0	0	0	0	0	0	0	0	0	0	12.7013	0	0	0	0	0	0	0	0	0	0	0
A0A669DEE6	DEP domain-containing protein 7	LOC100711448	Oreochromis niloticus (Nile tilapia) (Tilapia nilotica)	intracellular signal transduction [GO:0035556]			DVFQDSKSAFYR	0.97446	-1.5339	0	0	0	0	0	0	0	0	0	0	0	0	0	0	0	0	0	0	0	0	0	0	0	0	0	0	0	0	0	0	0	0	0	0	0	0	0	0	0	0
A0A669DEF0	DNA topoisomerase 2 (EC 5.6.2.2)		Oreochromis niloticus (Nile tilapia) (Tilapia nilotica)	DNA topological change [GO:0006265]	nucleus [GO:0005634]	ATP binding [GO:0005524]; DNA binding [GO:0003677]; DNA topoisomerase type II (double strand cut, ATP-hydrolyzing) activity [GO:0003918]; metal ion binding [GO:0046872]	KVTFVFWLQN	0.98872	-1.7632	0	0	0	0	0	0	0	0	0	0	0	0	0	0	0	0	0	0	0	0	0	0	0	0	0	0	0	0	0	0	0	0	0	0	0	0	0	10.2965	0	0
A0A669DEF7	DDE_3 domain-containing protein		Oreochromis niloticus (Nile tilapia) (Tilapia nilotica)	DNA integration [GO:0015074]; transposition, DNA-mediated [GO:0006313]		DNA binding [GO:0003677]	VARRKPLLR	0.93031	-1.0704	0	0	0	0	0	0	0	0	0	0	0	0	0	0	0	0	0	0	0	0	0	0	0	0	0	0	0	0	0	0	0	0	0	0	0	0	0	0	0	0
A0A669DEH0	SNTX thioredoxin-like domain-containing protein		Oreochromis niloticus (Nile tilapia) (Tilapia nilotica)				WIEDEER	0.99035	-1.5073	0	0	0	0	0	0	0	0	0	0	0	0	0	0	0	0	0	0	0	0	0	0	0	0	0	0	0	0	0	0	0	0	0	0	0	0	0	0	0	0
A0A669DEH7	U5 small nuclear ribonucleoprotein 200 kDa helicase	snrnp200	Oreochromis niloticus (Nile tilapia) (Tilapia nilotica)	cellular component organization or biogenesis [GO:0071840]; mRNA processing [GO:0006397]		ATP binding [GO:0005524]; helicase activity [GO:0004386]; hydrolase activity [GO:0016787]; nucleic acid binding [GO:0003676]	KNFPFER	0.95417	-1.2509	0	9.85142	0	0	0	0	0	0	0	0	0	0	0	0	0	0	0	0	0	0	0	0	0	0	0	0	0	0	0	0	0	0	0	0	0	0	0	0	0	0
A0A669DEL8	Protein kinase C and casein kinase substrate in neurons protein 3	LOC100691076	Oreochromis niloticus (Nile tilapia) (Tilapia nilotica)				VRARYEK	0.93513	-0.98403	0	0	0	0	13.2951	0	0	0	0	0	0	0	0	0	0	0	0	0	0	0	0	0	0	0	0	0	0	0	0	0	0	0	0	0	0	0	0	0	0	0
A0A669DEY6	Uncharacterized protein		Oreochromis niloticus (Nile tilapia) (Tilapia nilotica)	chromatin organization [GO:0006325]; histone modification [GO:0016570]		metal ion binding [GO:0046872]	ITRVILTK	0.98524	-1.5932	0	0	0	0	0	0	0	0	0	0	0	0	0	0	0	0	0	0	0	0	0	0	0	0	0	0	0	0	0	0	0	0	0	0	0	0	0	0	0	0
A0A669DF58	Integrin beta		Oreochromis niloticus (Nile tilapia) (Tilapia nilotica)	cell adhesion [GO:0007155]; integrin-mediated signaling pathway [GO:0007229]	anchoring junction [GO:0070161]; plasma membrane [GO:0005886]		KQCLTISK	0.99454	-2.7429	0	0	0	0	0	0	0	0	0	0	0	0	0	0	0	0	0	0	0	0	0	0	0	0	0	0	0	0	0	10.3869	0	0	0	0	0	0	0	0	0	0
A0A669DF83	F-actin monooxygenase (EC 1.14.13.225)	LOC100709311	Oreochromis niloticus (Nile tilapia) (Tilapia nilotica)	animal organ development [GO:0048513]	cytoplasm [GO:0005737]	actin binding [GO:0003779]; FAD binding [GO:0071949]; metal ion binding [GO:0046872]; monooxygenase activity [GO:0004497]	SMATQLLAKFEENSSTVKAR	0.99258	-3.186	0	0	0	0	10.3536	0	0	0	0	0	0	0	0	0	0	0	0	0	0	0	0	0	0	0	0	0	0	0	0	0	0	0	0	0	0	0	0	0	0	0
A0A669DFA7	Ig-like domain-containing protein		Oreochromis niloticus (Nile tilapia) (Tilapia nilotica)				YEWKLPRK	0.93705	-0.95262	0	0	0	0	0	10.2027	0	0	0	0	0	0	0	0	0	0	0	0	0	0	0	0	0	0	0	0	0	0	0	0	0	0	0	0	0	0	0	0	0	0
A0A669DFM1	Eukaryotic translation initiation factor 5B (Translation initiation factor IF-2)		Oreochromis niloticus (Nile tilapia) (Tilapia nilotica)		cellular anatomical entity [GO:0110165]	GTP binding [GO:0005525]; GTPase activity [GO:0003924]; translation initiation factor activity [GO:0003743]	ITRASIDALKNWFR	0.99533	-2.7137	0	0	0	0	0	0	0	0	0	0	0	0	0	0	0	0	0	0	0	0	0	0	0	0	0	0	0	0	0	0	0	0	0	0	0	0	0	0	0	0
A0A669DFM9	NACHT domain-containing protein		Oreochromis niloticus (Nile tilapia) (Tilapia nilotica)			metal ion binding [GO:0046872]	LDTLRVEPAGVR	0.94918	-1.2819	0	0	0	0	0	0	0	0	0	0	0	0	0	0	0	0	0	0	9.90097	0	0	0	0	0	0	0	0	0	0	0	0	0	0	0	0	0	0	0	0	0
A0A669DFS1	Myosin X, like 1		Oreochromis niloticus (Nile tilapia) (Tilapia nilotica)	signal transduction [GO:0007165]	myosin complex [GO:0016459]	actin binding [GO:0003779]; ATP binding [GO:0005524]; cytoskeletal motor activity [GO:0003774]	CSIMSVSSVASAWGR	0.99388	-3.0146	0	0	0	0	0	0	8.98635	0	8.43208	0	0	0	0	0	0	0	0	0	0	0	0	0	0	0	0	0	0	0	0	0	0	0	0	0	0	0	0	0	0	0
A0A669DFS6	Serine/threonine-protein kinase DCLK1	LOC100704088	Oreochromis niloticus (Nile tilapia) (Tilapia nilotica)	intracellular signal transduction [GO:0035556]; protein phosphorylation [GO:0006468]	cytoplasm [GO:0005737]	ATP binding [GO:0005524]; protein kinase activity [GO:0004672]	AGSPETR	0.99206	-1.5073	0	0	0	0	0	0	0	0	0	0	0	0	11.4123	0	0	0	0	11.8737	0	0	0	0	0	0	0	0	0	0	0	0	0	0	0	0	0	0	0	0	0	12.1028
A0A669DFT3	DUF3715 domain-containing protein		Oreochromis niloticus (Nile tilapia) (Tilapia nilotica)	negative regulation of gene expression, epigenetic [GO:0045814]			NNPPKTPKLEYSKPTSVLSEK	0.9958	-2.6916	12.1584	0	0	0	0	0	0	0	0	0	0	0	0	0	0	0	0	0	0	0	0	0	0	0	0	0	0	0	0	0	0	0	0	0	0	0	0	0	0	0
A0A669DFU0	Nucleoporin 188	nup188	Oreochromis niloticus (Nile tilapia) (Tilapia nilotica)	protein transport [GO:0015031]	nuclear pore [GO:0005643]	structural constituent of nuclear pore [GO:0017056]	YLSTMLK	0.99132	-1.5073	0	0	0	0	0	0	0	0	0	0	0	0	0	0	0	0	0	0	0	0	0	0	0	0	0	0	0	0	0	0	0	0	0	0	0	0	0	0	0	0
A0A669DFV0	Reelin	RELN	Oreochromis niloticus (Nile tilapia) (Tilapia nilotica)	cell adhesion [GO:0007155]; central nervous system development [GO:0007417]; neuron migration [GO:0001764]	extracellular region [GO:0005576]	hydrolase activity [GO:0016787]; lipoprotein particle receptor binding [GO:0070325]; metal ion binding [GO:0046872]	ITLSLPQK	0.95979	-1.466	0	0	11.1808	0	0	13.6374	11.691	0	0	0	0	0	0	0	0	0	0	0	0	0	0	0	0	0	0	0	0	0	0	0	0	0	0	0	0	0	0	0	0	0
A0A669DFZ1	Structural maintenance of chromosomes flexible hinge domain containing 1	smchd1	Oreochromis niloticus (Nile tilapia) (Tilapia nilotica)	chromosome organization [GO:0051276]; double-strand break repair [GO:0006302]	chromosome [GO:0005694]	ATP binding [GO:0005524]	TIIDEERGK	0	0.00096619	0	8.9043	8.56902	0	0	0	9.06819	9.03826	8.90364	0	0	0	0	0	0	8.59716	8.42601	0	0	0	0	0	0	0	0	0	0	0	0	0	0	0	0	0	0	0	0	0	0	0
A0A669DG32	CST complex subunit CTC1	LOC100705733	Oreochromis niloticus (Nile tilapia) (Tilapia nilotica)		chromosome, telomeric region [GO:0000781]; nucleus [GO:0005634]	single-stranded DNA binding [GO:0003697]	LTLCDQAGR	0.9831	-1.6468	0	11.0775	0	0	9.01856	9.24236	0	0	0	0	0	0	0	9.55991	0	0	0	10.7882	0	0	0	10.0779	0	9.86533	0	11.2192	11.1935	0	0	0	0	9.08611	0	0	0	0	0	8.94997	0	0
A0A669DG51	Zinc finger protein 423	ZNF423	Oreochromis niloticus (Nile tilapia) (Tilapia nilotica)				CHLLLTCK	0.98952	-2.0059	0	0	0	0	0	0	0	0	0	0	0	0	0	0	0	0	0	0	0	0	0	0	0	0	0	0	0	0	9.15899	0	0	0	0	0	0	0	0	0	0	0
A0A669DGA9	Spastin	SPAST	Oreochromis niloticus (Nile tilapia) (Tilapia nilotica)	cell cycle [GO:0007049]; cell division [GO:0051301]	membrane [GO:0016020]	ATP binding [GO:0005524]; ATP hydrolysis activity [GO:0016887]	NIHKQAFEYISK	0.99523	-2.1591	0	0	0	0	0	0	0	0	0	0	0	0	0	0	0	0	0	0	0	0	0	0	0	0	0	0	0	0	0	0	0	0	0	0	0	0	0	0	0	0
A0A669DGD6	Bromodomain containing 1b		Oreochromis niloticus (Nile tilapia) (Tilapia nilotica)			metal ion binding [GO:0046872]	AKQTDHMESNQALK	0.99335	-3.8277	0	0	0	0	0	0	0	0	0	11.3932	0	0	0	0	0	0	0	0	0	0	0	9.22648	0	0	0	0	0	0	0	0	0	0	0	0	0	0	0	0	0	0
A0A669DGI1	Tetratricopeptide repeat domain 13	ttc13	Oreochromis niloticus (Nile tilapia) (Tilapia nilotica)				QFNSKTR	0.9826	-1.6243	0	0	0	9.02597	0	0	0	0	0	0	0	0	0	0	0	0	0	0	0	0	0	0	0	0	0	0	0	0	0	0	0	0	0	0	0	0	0	0	0	0
A0A669DGL7	DNA damage-binding protein 1 (Damage-specific DNA-binding protein 1)	ddb1	Oreochromis niloticus (Nile tilapia) (Tilapia nilotica)	DNA repair [GO:0006281]; proteasome-mediated ubiquitin-dependent protein catabolic process [GO:0043161]; protein ubiquitination [GO:0016567]	nucleus [GO:0005634]	nucleic acid binding [GO:0003676]	LYDGLFK	0.99868	-2.4388	0	0	0	0	0	0	9.48464	9.15921	0	0	0	0	0	0	0	0	0	0	0	0	0	0	0	0	0	0	0	0	0	0	0	0	0	0	0	0	0	0	0	0
A0A669DGS6	NACHT domain-containing protein		Oreochromis niloticus (Nile tilapia) (Tilapia nilotica)			metal ion binding [GO:0046872]	HLCGFLESPDCR	0.95937	-1.4778	0	0	0	0	0	0	0	0	0	0	0	0	0	0	0	0	0	0	0	0	0	0	0	0	0	0	0	0	0	0	0	0	0	0	0	0	0	0	0	0
A0A669DGV2	Kelch like family member 7	klhl7	Oreochromis niloticus (Nile tilapia) (Tilapia nilotica)	protein ubiquitination [GO:0016567]	Cul3-RING ubiquitin ligase complex [GO:0031463]		RMDCYNVLK	0.98917	-1.7767	0	0	0	0	0	0	0	0	0	0	0	0	0	0	0	0	0	0	0	0	0	0	0	0	0	0	0	0	0	0	0	0	0	0	8.61121	0	0	0	0	0
A0A669DGY9	Collagen alpha-2(XI) chain	LOC100704203	Oreochromis niloticus (Nile tilapia) (Tilapia nilotica)			extracellular matrix structural constituent [GO:0005201]	GPHGLMGPPGKAGR	0.99457	-2.8151	0	0	0	0	0	0	0	0	0	0	0	0	0	0	0	0	0	0	0	0	0	0	0	0	0	0	0	0	0	0	0	0	0	0	0	0	0	0	0	0
A0A669DH08	non-specific serine/threonine protein kinase (EC 2.7.11.1)	mark2	Oreochromis niloticus (Nile tilapia) (Tilapia nilotica)	protein phosphorylation [GO:0006468]	cytoplasm [GO:0005737]; dendrite [GO:0030425]	ATP binding [GO:0005524]; protein serine/threonine kinase activity [GO:0004674]	TGDQGSSYSK	0.97823	-1.5783	0	0	0	0	0	0	0	0	0	0	0	0	0	0	0	0	0	0	0	0	0	0	0	0	0	0	0	0	0	0	0	0	0	0	0	0	0	0	0	0
A0A669DH36	Myc box-dependent-interacting protein 1	LOC100707182	Oreochromis niloticus (Nile tilapia) (Tilapia nilotica)		cytoplasm [GO:0005737]; intracellular organelle [GO:0043229]		LEETDTTSGK	0.94493	-1.2055	0	0	0	0	0	0	0	0	0	0	0	0	0	10.4124	0	0	0	0	0	0	0	0	10.6011	0	0	0	0	0	0	0	0	0	0	0	9.56493	9.716	0	0	0	0
A0A669DH47	Regulating synaptic membrane exocytosis 1a		Oreochromis niloticus (Nile tilapia) (Tilapia nilotica)	exocytosis [GO:0006887]; intracellular protein transport [GO:0006886]	membrane [GO:0016020]; synapse [GO:0045202]	metal ion binding [GO:0046872]; small GTPase binding [GO:0031267]	RRGGEVGDGARPGQR	0.98882	-2.0011	0	0	0	0	0	0	0	0	8.80848	0	0	0	0	0	0	0	0	0	0	0	0	0	0	0	0	0	0	0	0	0	0	0	0	0	0	0	0	0	0	0
A0A669DH98	Dynein axonemal heavy chain 17	DNAH17	Oreochromis niloticus (Nile tilapia) (Tilapia nilotica)	microtubule-based movement [GO:0007018]	9+2 motile cilium [GO:0097729]; cytoplasm [GO:0005737]; dynein complex [GO:0030286]; microtubule [GO:0005874]	ATP binding [GO:0005524]; dynein intermediate chain binding [GO:0045505]; dynein light intermediate chain binding [GO:0051959]; minus-end-directed microtubule motor activity [GO:0008569]	ISVEVLSVVAVQVKSIQDAIRDK	0.99143	-2.1207	0	0	0	0	0	0	0	0	0	0	0	0	0	0	0	0	0	0	0	0	0	0	0	0	0	0	0	11.2373	0	0	0	0	0	0	0	0	0	0	0	0
A0A669DHB3	Cytoplasmic polyadenylation element binding protein 1	cpeb1	Oreochromis niloticus (Nile tilapia) (Tilapia nilotica)	mRNA processing [GO:0006397]		metal ion binding [GO:0046872]; mRNA 3'-UTR binding [GO:0003730]; translation regulator activity [GO:0045182]	HPRCPPKGYVYLVFENEK	0.31111	-0.3372	0	0	0	0	0	0	0	9.60231	0	0	0	0	0	0	0	0	0	0	0	0	0	0	0	0	0	0	0	0	0	0	0	0	0	0	0	0	0	0	0	0
A0A669DHF6	C2H2-type domain-containing protein		Oreochromis niloticus (Nile tilapia) (Tilapia nilotica)				FASIPAEVKK	0.94071	-1.1799	0	0	0	0	0	0	0	0	0	0	0	0	0	0	0	0	0	0	0	0	0	0	0	0	0	0	0	0	0	0	0	0	0	0	0	0	0	9.90271	0	0
A0A669DHF8	B box-type domain-containing protein		Oreochromis niloticus (Nile tilapia) (Tilapia nilotica)			zinc ion binding [GO:0008270]	ALSVTEVVCK	0.95204	-1.4258	0	0	0	0	10.0725	0	0	0	0	0	0	0	0	0	0	0	0	0	0	0	0	0	0	0	0	0	0	0	0	0	0	0	0	0	0	0	0	0	0	0
A0A669DHJ6	Lysosome membrane protein 2	LOC100705846	Oreochromis niloticus (Nile tilapia) (Tilapia nilotica)		lysosome [GO:0005764]; membrane [GO:0016020]	scavenger receptor activity [GO:0005044]	VDTWKGERSLYTVYEEDVTVK	0.98947	-1.9617	0	9.07119	0	0	0	0	0	0	0	0	0	0	0	0	0	0	0	0	0	0	0	0	0	0	0	0	0	0	0	0	0	0	0	0	0	0	0	0	0	0
A0A669DHS6	tRNA-dihydrouridine(47) synthase [NAD(P)(+)] (EC 1.3.1.-) (tRNA-dihydrouridine synthase 3)	dus3l	Oreochromis niloticus (Nile tilapia) (Tilapia nilotica)			flavin adenine dinucleotide binding [GO:0050660]; metal ion binding [GO:0046872]; tRNA dihydrouridine synthase activity [GO:0017150]	AFIKNPFSR	0.97752	-1.5755	0	0	0	0	0	0	0	0	0	0	0	0	0	0	0	9.15621	0	0	0	0	0	0	0	0	0	0	0	0	0	0	0	0	0	0	0	0	0	0	0	0
A0A669DHT6	Cysteine and glycine-rich protein 2	LOC100698598	Oreochromis niloticus (Nile tilapia) (Tilapia nilotica)	animal organ development [GO:0048513]		metal ion binding [GO:0046872]	NTCMLNKQLK	0.35	-0.3867	0	0	0	0	0	0	0	0	0	0	0	0	0	0	0	0	0	0	0	0	0	0	0	0	0	0	0	0	0	0	0	0	0	0	0	0	0	0	0	0
A0A669DHX3	Reverse transcriptase domain-containing protein		Oreochromis niloticus (Nile tilapia) (Tilapia nilotica)				LFSNDFVLGHSLR	0.99144	-2.1297	0	0	0	0	0	0	0	0	0	0	0	0	0	0	0	0	0	0	0	0	0	0	0	0	0	0	0	9.0141	0	0	0	0	0	0	0	0	0	0	0	0
A0A669DHZ2	Band 4.1-like protein 1	LOC100702354	Oreochromis niloticus (Nile tilapia) (Tilapia nilotica)	cortical actin cytoskeleton organization [GO:0030866]	cytoskeleton [GO:0005856]	actin binding [GO:0003779]; structural molecule activity [GO:0005198]	ISSATPPGGTPER	0.99297	-3.3963	0	0	0	0	0	9.38379	0	0	0	0	0	0	0	0	0	0	0	0	0	0	0	0	0	0	0	0	0	0	0	0	0	0	0	0	0	0	0	0	0	0
A0A669DI27	Cadherin domain-containing protein		Oreochromis niloticus (Nile tilapia) (Tilapia nilotica)	homophilic cell adhesion via plasma membrane adhesion molecules [GO:0007156]	plasma membrane [GO:0005886]	calcium ion binding [GO:0005509]	YLDFNKK	0.94983	-1.2232	0	0	0	0	0	0	0	0	0	0	0	0	0	0	0	0	0	0	0	0	0	0	0	0	0	0	0	0	0	0	0	0	0	0	0	0	0	0	0	0
A0A669DI34	Cytoplasmic linker associated protein 2		Oreochromis niloticus (Nile tilapia) (Tilapia nilotica)	regulation of cellular component organization [GO:0051128]	cytoplasm [GO:0005737]; kinetochore [GO:0000776]; membrane [GO:0016020]		EHVIRTLALR	0.98522	-1.6654	0	0	0	0	0	0	0	0	0	0	0	0	0	0	0	0	0	0	0	0	0	0	0	0	0	0	0	0	0	0	0	0	0	0	0	0	0	0	0	0
A0A669DI72	Rab11 family-interacting protein 1	LOC100702832	Oreochromis niloticus (Nile tilapia) (Tilapia nilotica)	protein transport [GO:0015031]	endosome [GO:0005768]; membrane [GO:0016020]	small GTPase binding [GO:0031267]	LQEEQERK	0.93858	-0.99915	0	0	0	0	0	0	0	10.0795	9.98057	0	0	0	0	0	0	8.92935	0	0	0	0	0	0	0	0	0	0	0	0	0	0	0	0	0	0	0	0	0	0	0	0
A0A669DIA7	Serotransferrin		Oreochromis niloticus (Nile tilapia) (Tilapia nilotica)	ion transport [GO:0006811]; iron ion homeostasis [GO:0055072]	extracellular space [GO:0005615]	metal ion binding [GO:0046872]	GPGGGMVTRVNFR	0.94171	-0.79043	0	0	0	0	0	0	0	0	0	0	0	0	0	0	0	0	0	0	0	0	0	0	0	0	0	0	0	0	0	0	0	0	0	0	0	0	0	0	0	0
A0A669DIC0	Proteasome subunit beta	psmb7	Oreochromis niloticus (Nile tilapia) (Tilapia nilotica)	proteolysis involved in protein catabolic process [GO:0051603]	cytoplasm [GO:0005737]; nucleus [GO:0005634]; proteasome core complex [GO:0005839]	threonine-type endopeptidase activity [GO:0004298]	FIFLILR	0.99714	-4.154	0	0	0	0	0	0	0	0	0	0	0	0	0	0	0	0	0	0	0	0	0	0	0	0	0	0	0	0	0	0	0	0	0	0	0	0	0	0	10.067	0
A0A669DID2	Prostaglandin reductase 1 (EC 1.3.1.48) (EC 1.3.1.74) (15-oxoprostaglandin 13-reductase) (Dithiolethione-inducible gene 1 protein) (Leukotriene B4 12-hydroxydehydrogenase) (NAD(P)H-dependent alkenal/one oxidoreductase)	LOC100691639	Oreochromis niloticus (Nile tilapia) (Tilapia nilotica)		cytoplasm [GO:0005737]	13-prostaglandin reductase activity [GO:0036132]; 15-oxoprostaglandin 13-oxidase activity [GO:0047522]; 2-alkenal reductase [NAD(P)+] activity [GO:0032440]	LFSKTHIK	0.97793	-1.5867	0	0	0	0	0	0	0	0	0	0	0	0	0	0	0	0	0	0	0	0	0	0	0	0	0	0	0	0	0	0	0	0	0	0	0	0	0	11.7651	0	0
A0A669DIE5	C-type lectin domain-containing protein		Oreochromis niloticus (Nile tilapia) (Tilapia nilotica)				NQSENEQLK	0.95585	-1.4619	0	0	0	0	0	0	0	0	0	0	0	0	0	0	0	0	0	0	0	0	0	0	0	0	0	0	0	0	0	0	0	0	0	0	0	0	0	0	0	0
A0A669DIW6	Ankyrin repeat and BTB domain containing 2	abtb2	Oreochromis niloticus (Nile tilapia) (Tilapia nilotica)			protein heterodimerization activity [GO:0046982]	AISLYSMSAGELLR	0.99104	-2.0851	0	0	0	0	0	0	0	0	0	0	0	0	0	0	0	0	0	0	0	0	0	0	0	0	0	0	0	10.0913	0	0	0	0	0	0	0	0	0	0	0	0
A0A669DIY3	Migration and invasion inhibitory protein	miip	Oreochromis niloticus (Nile tilapia) (Tilapia nilotica)	negative regulation of cell migration [GO:0030336]; negative regulation of G2/M transition of mitotic cell cycle [GO:0010972]			MDRLEVLR	0.99303	-3.1731	0	0	0	0	0	0	0	11.1831	11.0245	0	0	0	0	0	0	10.4258	0	0	0	0	0	0	0	0	0	0	0	0	0	0	0	0	13.0295	0	0	0	0	0	0	0
A0A669DIZ5	28 kDa heat- and acid-stable phosphoprotein	LOC100698452	Oreochromis niloticus (Nile tilapia) (Tilapia nilotica)				EAEEAKAKR	0.93143	-1.0076	0	0	0	0	0	0	0	0	0	10.9558	0	0	0	0	0	0	0	0	0	0	0	0	0	0	0	0	0	0	0	0	0	0	0	0	0	0	0	0	0	0
A0A669DJ39	C-type lectin domain-containing protein		Oreochromis niloticus (Nile tilapia) (Tilapia nilotica)				WSMEGKHFLCSWSMEGK	0.91518	-0.68085	0	0	0	0	0	0	0	0	0	0	0	0	0	0	0	0	0	0	0	0	0	0	0	0	0	0	0	0	0	0	0	0	0	0	0	0	0	0	0	0
A0A669DJ50	ribonuclease H (EC 3.1.26.4)		Oreochromis niloticus (Nile tilapia) (Tilapia nilotica)	DNA recombination [GO:0006310]; proteolysis [GO:0006508]; viral entry into host cell [GO:0046718]		aspartic-type endopeptidase activity [GO:0004190]; DNA-directed DNA polymerase activity [GO:0003887]; metal ion binding [GO:0046872]; RNA binding [GO:0003723]; RNA-directed DNA polymerase activity [GO:0003964]; RNA-DNA hybrid ribonuclease activity [GO:0004523]	DIFSFTYR	0.93049	-0.98403	0	11.6439	0	0	14.1302	0	0	0	0	0	0	0	0	0	0	0	0	0	0	0	0	0	0	0	10.7729	0	0	13.0198	0	0	13.1673	13.1931	0	0	0	12.2356	0	0	0	11.8308
A0A669DJ79	Beta-centractin	LOC100691670	Oreochromis niloticus (Nile tilapia) (Tilapia nilotica)				YLRLLLRK	0.93102	-0.95845	9.29377	0	0	0	0	0	0	0	0	0	0	0	0	0	0	0	0	0	0	0	0	0	0	0	0	0	0	0	0	0	0	0	0	0	0	0	0	0	0	0
A0A669DJB4	Kinesin family member 1Ab		Oreochromis niloticus (Nile tilapia) (Tilapia nilotica)	microtubule-based movement [GO:0007018]; system development [GO:0048731]	axon [GO:0030424]; cytoplasm [GO:0005737]	ATP binding [GO:0005524]; microtubule binding [GO:0008017]; microtubule motor activity [GO:0003777]	TRDTHVHRK	0.9305	-1.0261	0	0	0	0	0	0	8.54144	0	0	0	0	0	0	0	0	0	0	0	0	0	0	0	0	0	0	0	0	0	0	0	0	0	0	0	0	0	0	0	0	0
A0A669DJB8	Reverse transcriptase domain-containing protein		Oreochromis niloticus (Nile tilapia) (Tilapia nilotica)				ACHGCQGESCGEGGK	0.98811	-1.9951	0	0	0	0	0	0	0	0	0	0	0	0	0	0	0	0	0	0	0	0	0	0	0	0	0	0	0	0	0	0	0	0	0	0	0	0	0	0	0	0
A0A669DJD6	AT-hook containing transcription factor 1	ahctf1	Oreochromis niloticus (Nile tilapia) (Tilapia nilotica)		nucleus [GO:0005634]		AQATNTR	0.99556	-2.9478	0	0	0	0	0	0	0	0	0	0	0	0	0	0	0	0	0	0	0	0	0	0	0	0	0	0	0	0	0	0	0	0	0	0	0	0	0	0	0	0
A0A669DJV4	SHSP domain-containing protein		Oreochromis niloticus (Nile tilapia) (Tilapia nilotica)				MIFIEVL	1	-1.5073	0	0	0	0	0	0	0	0	0	0	0	0	0	0	0	0	0	0	0	0	0	0	0	0	0	0	0	0	0	0	0	0	0	0	0	0	0	0	0	0
A0A669DJY7	BCL6 transcription repressor	bcl6	Oreochromis niloticus (Nile tilapia) (Tilapia nilotica)				CETCGAR	0.99539	-2.1544	0	0	0	0	0	0	0	0	0	13.1384	0	0	0	0	0	0	0	0	0	0	0	0	0	0	0	0	0	0	0	0	0	0	0	0	0	0	0	0	0	0
A0A669DJZ6	Histone acetyltransferase (EC 2.3.1.48)		Oreochromis niloticus (Nile tilapia) (Tilapia nilotica)	histone acetylation [GO:0016573]; nucleosome assembly [GO:0006334]; regulation of DNA-templated transcription [GO:0006355]	nucleosome [GO:0000786]; nucleus [GO:0005634]	DNA binding [GO:0003677]; histone acetyltransferase activity [GO:0004402]; metal ion binding [GO:0046872]	ARPRQLEVDPECLR	0.99501	-2.7255	0	0	0	0	0	0	0	0	0	0	0	0	0	0	0	0	0	0	0	0	0	0	0	0	0	0	0	0	0	0	0	0	0	0	0	0	0	0	0	0
A0A669DK05	Lin-7 homolog C, crumbs cell polarity complex component	lin7c	Oreochromis niloticus (Nile tilapia) (Tilapia nilotica)	exocytosis [GO:0006887]; protein transport [GO:0015031]	anchoring junction [GO:0070161]; plasma membrane [GO:0005886]		TGEVPPQK	0.96013	-1.4727	0	0	0	0	14.1759	0	0	0	0	0	0	0	0	0	0	0	0	0	0	0	0	0	0	0	0	0	0	0	0	0	0	0	0	0	0	0	0	0	0	0
A0A669DK22	Lactase-phlorizin hydrolase	LOC100703330	Oreochromis niloticus (Nile tilapia) (Tilapia nilotica)	carbohydrate metabolic process [GO:0005975]		hydrolase activity, hydrolyzing O-glycosyl compounds [GO:0004553]	ELKVSHYR	0.99763	-2.2172	0	0	0	0	0	0	0	0	0	0	0	0	0	0	0	0	0	0	0	0	0	0	0	0	0	0	0	0	0	0	0	0	0	0	0	9.83927	0	0	0	0
A0A669DK86	P2Y purinoceptor 14-like	LOC102080595	Oreochromis niloticus (Nile tilapia) (Tilapia nilotica)		membrane [GO:0016020]	G protein-coupled receptor activity [GO:0004930]	TFRSRVR	0.93481	-0.98403	0	0	0	0	0	0	0	0	0	0	0	0	0	0	0	0	0	0	0	0	0	0	0	0	0	0	0	0	0	0	0	0	0	0	0	0	0	0	0	0
A0A669DKA9	Nance-Horan syndrome a (congenital cataracts and dental anomalies)		Oreochromis niloticus (Nile tilapia) (Tilapia nilotica)				RTVAGVPR	0.98767	-1.7308	0	0	0	0	0	0	0	0	0	0	0	0	0	0	0	0	0	0	0	0	0	0	0	0	0	0	0	0	0	0	0	0	0	0	0	0	0	0	0	0
A0A669DKB0	Uncharacterized LOC100692382	LOC100692382	Oreochromis niloticus (Nile tilapia) (Tilapia nilotica)				LRGLPDLKSLVD	0.9966	-2.1823	0	0	0	0	0	0	0	0	0	0	0	0	0	0	0	0	0	0	0	0	0	0	0	0	0	0	0	0	0	0	0	0	0	0	0	0	0	0	0	0
A0A669DKF0	Neuroepithelial cell transforming 1	NET1	Oreochromis niloticus (Nile tilapia) (Tilapia nilotica)	intracellular signal transduction [GO:0035556]		guanyl-nucleotide exchange factor activity [GO:0005085]	MFLCCRSK	0.98685	-1.7488	0	0	0	0	0	0	0	0	8.96151	0	0	0	0	0	0	0	0	0	0	0	0	0	0	0	0	0	0	0	0	0	0	0	0	0	0	0	0	0	0	0
A0A669DKH7	Calcium/calmodulin-dependent protein kinase kinase 1	LOC100697126	Oreochromis niloticus (Nile tilapia) (Tilapia nilotica)	protein phosphorylation [GO:0006468]	cytoplasm [GO:0005737]	ATP binding [GO:0005524]; protein serine/threonine kinase activity [GO:0004674]	LSLQERGSR	0.95092	-1.3518	0	0	0	0	0	0	0	0	0	0	0	0	0	0	0	0	0	0	0	0	0	0	0	0	0	0	0	0	0	0	0	0	0	0	0	0	0	0	0	0
A0A669DKI9	TMEM9 domain family member B	tmem9b	Oreochromis niloticus (Nile tilapia) (Tilapia nilotica)		lysosomal membrane [GO:0005765]		RQVQEQR	0.98567	-1.767	0	0	11.136	0	0	0	0	0	0	0	0	0	0	0	0	0	0	0	0	0	0	0	0	0	0	0	0	0	0	0	0	0	0	0	0	0	0	0	0	0
A0A669DKQ1	Contactin associated protein like 2	CNTNAP2	Oreochromis niloticus (Nile tilapia) (Tilapia nilotica)	anatomical structure development [GO:0048856]; regulation of response to external stimulus [GO:0032101]	membrane [GO:0016020]; paranodal junction [GO:0033010]		CMPNHCEHGGR	0.99786	-2.4822	0	0	0	0	0	0	0	0	0	0	0	0	0	0	0	0	0	0	0	0	0	0	0	0	0	0	0	10.3449	0	9.86939	0	0	0	0	0	0	0	0	0	0
A0A669DKR6	Sushi domain containing 1	susd1	Oreochromis niloticus (Nile tilapia) (Tilapia nilotica)	animal organ development [GO:0048513]	membrane [GO:0016020]	calcium ion binding [GO:0005509]	NNFKYQHDNWR	0.95162	-1.2654	0	0	0	0	8.69714	0	0	0	0	0	0	0	0	0	0	0	0	0	0	0	0	0	0	0	0	0	0	0	0	0	0	0	0	0	0	0	0	0	0	0
A0A669DKV1	C2H2-type domain-containing protein		Oreochromis niloticus (Nile tilapia) (Tilapia nilotica)				EKPIQKK	0.99355	-3.0009	0	0	0	0	0	0	0	0	0	0	0	0	0	0	0	0	0	0	0	0	0	0	0	0	0	0	0	0	0	0	0	0	0	0	0	0	0	0	0	0
A0A669DKZ8	Alpha 1,3-galactosyltransferase 2	A3GALT2	Oreochromis niloticus (Nile tilapia) (Tilapia nilotica)	carbohydrate metabolic process [GO:0005975]	membrane [GO:0016020]	hexosyltransferase activity [GO:0016758]	YIKIVQVEK	0.98493	-1.5905	0	0	0	0	0	0	0	0	0	0	0	0	0	0	0	0	0	0	0	0	0	0	0	0	0	0	0	0	0	0	11.2133	0	0	0	0	0	0	0	0	0
A0A669DLC7	FA complementation group I	fanci	Oreochromis niloticus (Nile tilapia) (Tilapia nilotica)	DNA repair [GO:0006281]			GKKVGTIIK	0.99451	-3.439	0	0	0	0	0	0	0	0	0	0	0	0	0	0	0	0	0	0	0	0	0	0	0	0	0	0	0	0	0	0	0	0	0	0	0	0	0	0	0	0
A0A669DLE1	histone deacetylase (EC 3.5.1.98)		Oreochromis niloticus (Nile tilapia) (Tilapia nilotica)	chromatin organization [GO:0006325]; histone deacetylation [GO:0016575]		histone deacetylase activity [GO:0004407]; metal ion binding [GO:0046872]	QRLFENLR	0.98564	-1.5929	0	0	0	10.7836	0	0	0	0	0	0	0	0	0	0	0	0	0	0	0	0	0	0	0	0	0	0	0	0	0	0	0	0	0	0	0	0	0	0	0	0
A0A669DLF6	Uncharacterized protein		Oreochromis niloticus (Nile tilapia) (Tilapia nilotica)		nucleus [GO:0005634]	RNA binding [GO:0003723]; zinc ion binding [GO:0008270]	LNGKRLTIYVSR	0.9997	-4.4599	0	0	0	0	0	0	0	0	0	0	0	0	0	0	0	0	0	0	0	0	0	0	0	0	0	0	0	0	0	0	0	0	0	0	0	0	0	0	0	0
A0A669DLG2	26S proteasome non-ATPase regulatory subunit 2	psmd2	Oreochromis niloticus (Nile tilapia) (Tilapia nilotica)	regulation of protein catabolic process [GO:0042176]	proteasome regulatory particle, base subcomplex [GO:0008540]	enzyme regulator activity [GO:0030234]	EEQELSEEDK	0.94174	-1.2146	0	0	0	0	0	0	0	0	0	0	0	0	0	0	0	0	9.48234	0	0	0	0	0	0	0	0	0	0	0	0	0	0	0	8.85779	0	0	0	0	0	0	0
A0A669DLJ4	KIAA2026 ortholog	kiaa2026	Oreochromis niloticus (Nile tilapia) (Tilapia nilotica)				TNVVSALPR	0.95203	-1.2695	0	0	0	0	0	0	0	0	0	0	0	0	0	0	0	0	0	0	0	0	0	0	0	0	0	0	0	0	0	0	0	0	0	0	0	0	0	0	0	0
A0A669DLL1	Probable E3 ubiquitin-protein ligase ARI5	LOC100700750	Oreochromis niloticus (Nile tilapia) (Tilapia nilotica)			metal ion binding [GO:0046872]; transferase activity [GO:0016740]	FVVCPRCK	0.97802	-1.5783	0	0	0	9.03936	0	0	0	0	0	0	0	0	0	0	0	0	0	0	0	0	0	0	0	0	0	0	0	0	0	0	0	0	0	0	0	0	0	0	0	0
A0A669DLP4	Structural maintenance of chromosomes protein	smc2	Oreochromis niloticus (Nile tilapia) (Tilapia nilotica)	cell cycle [GO:0007049]; chromosome condensation [GO:0030261]	chromosome [GO:0005694]; nucleus [GO:0005634]	ATP binding [GO:0005524]; ATP hydrolysis activity [GO:0016887]	KIQEKPK	0.98585	-1.767	0	0	0	0	0	0	0	0	0	0	0	0	0	0	0	0	0	0	0	0	0	0	0	0	0	0	0	0	0	0	0	0	0	0	0	0	0	0	0	0
A0A669DLS4	GATOR complex protein NPRL3 (Nitrogen permease regulator 3-like protein)		Oreochromis niloticus (Nile tilapia) (Tilapia nilotica)	cellular response to amino acid starvation [GO:0034198]; negative regulation of TOR signaling [GO:0032007]	GATOR1 complex [GO:1990130]; lysosome [GO:0005764]		SQLKTLFDK	0.97742	-1.5718	0	0	0	0	0	0	0	0	0	0	0	0	0	0	0	0	0	0	0	0	0	0	0	0	0	0	0	0	0	0	0	0	0	0	0	0	0	0	0	0
A0A669DLW5	Myosin heavy chain, fast skeletal muscle	LOC100689722	Oreochromis niloticus (Nile tilapia) (Tilapia nilotica)	system development [GO:0048731]	myosin complex [GO:0016459]	actin filament binding [GO:0051015]; ATP binding [GO:0005524]; cytoskeletal motor activity [GO:0003774]	AKGNLEKMCR	0.97813	-1.5745	0	0	0	0	0	0	0	0	0	0	0	0	0	0	0	0	0	0	0	0	0	0	0	0	0	0	0	0	0	0	0	0	0	0	0	0	0	0	0	0
A0A669DLW6	Annexin	LOC100700081	Oreochromis niloticus (Nile tilapia) (Tilapia nilotica)			calcium ion binding [GO:0005509]; calcium-dependent phospholipid binding [GO:0005544]	LLLKLCGGSD	0.99197	-3.1989	0	0	0	0	0	0	0	0	0	10.1897	0	0	0	0	0	0	0	0	0	0	0	0	0	0	0	0	0	0	0	0	0	0	0	0	0	0	0	0	0	0
A0A669DLW9	AT-rich interactive domain-containing protein 3B	LOC100695615	Oreochromis niloticus (Nile tilapia) (Tilapia nilotica)			DNA binding [GO:0003677]	DFAKLYELDNDPK	0.98438	-1.7384	0	0	0	9.48619	0	0	0	0	0	0	0	0	0	0	0	0	0	0	0	0	0	0	0	0	0	0	0	0	0	0	0	0	0	0	0	0	0	0	0	0
A0A669DLX9	Transketolase b		Oreochromis niloticus (Nile tilapia) (Tilapia nilotica)			metal ion binding [GO:0046872]; transferase activity [GO:0016740]	AFWQAQQVKGKPTCIVAKTFK	0.93065	-0.96085	9.37623	9.30656	9.02533	0	0	0	9.88914	9.94962	9.88513	0	0	0	0	0	0	0	0	9.47133	0	0	0	0	8.70363	0	9.55054	9.63603	9.53681	0	0	0	0	0	0	0	0	0	8.58256	0	0	0
A0A669DLZ1	Glutamate receptor	LOC100697557	Oreochromis niloticus (Nile tilapia) (Tilapia nilotica)		postsynaptic membrane [GO:0045211]	ionotropic glutamate receptor activity [GO:0004970]	SVGNIVDPTEYR	0.95234	-1.3184	0	0	0	0	0	0	0	0	0	0	0	0	0	0	0	0	0	0	0	0	0	0	0	0	0	0	0	0	0	0	0	0	0	0	0	0	0	0	0	0
A0A669DMA0	Acyl-coenzyme A diphosphatase NUDT19 (Nucleoside diphosphate-linked moiety X motif 19)		Oreochromis niloticus (Nile tilapia) (Tilapia nilotica)			hydrolase activity [GO:0016787]; metal ion binding [GO:0046872]	LYPVDSPR	0.96113	-1.4747	0	0	0	0	0	0	0	0	0	0	0	0	0	0	0	0	0	0	0	0	0	0	0	0	0	0	0	0	0	0	0	0	0	0	0	0	0	0	0	0
A0A669DMD0	DNA mismatch repair protein	msh2	Oreochromis niloticus (Nile tilapia) (Tilapia nilotica)	mismatch repair [GO:0006298]	MutSalpha complex [GO:0032301]	ATP binding [GO:0005524]; ATP-dependent DNA damage sensor activity [GO:0140664]; mismatched DNA binding [GO:0030983]	AVSIKQAFVI	0.99638	-4.0794	0	0	0	0	0	11.5881	10.3591	0	0	0	0	0	0	0	0	0	0	0	0	0	0	0	0	0	0	0	0	0	0	0	0	0	0	0	0	0	0	0	0	0
A0A669DML4	Apoptosis inducing factor mitochondria associated 1	aifm1	Oreochromis niloticus (Nile tilapia) (Tilapia nilotica)	apoptotic process [GO:0006915]	mitochondrion [GO:0005739]	flavin adenine dinucleotide binding [GO:0050660]; oxidoreductase activity [GO:0016491]; protein dimerization activity [GO:0046983]	VVHMDVR	1.0038	-1.5073	0	0	0	0	0	0	0	0	0	0	0	0	0	0	0	0	0	0	0	0	0	0	0	0	0	0	0	0	0	0	0	0	0	0	0	0	0	0	0	0
A0A669DMU5	Uncharacterized protein		Oreochromis niloticus (Nile tilapia) (Tilapia nilotica)		cytoskeleton [GO:0005856]	actin binding [GO:0003779]	LAAALHK	0.93941	-0.78086	0	0	0	0	0	0	0	0	0	0	0	0	0	0	0	0	0	0	0	0	0	0	0	0	0	0	0	0	0	0	0	0	0	0	0	0	0	0	0	0
A0A669DMV7	Kinesin family member 21B	kif21b	Oreochromis niloticus (Nile tilapia) (Tilapia nilotica)	microtubule-based movement [GO:0007018]; system development [GO:0048731]	cytoskeleton [GO:0005856]; membrane [GO:0016020]	ATP binding [GO:0005524]; microtubule binding [GO:0008017]; microtubule motor activity [GO:0003777]	ITDIVMQR	0.95563	-1.3708	0	0	0	0	0	10.3316	0	0	0	0	0	0	0	0	0	0	0	0	0	9.06337	0	0	0	9.57935	0	0	0	0	0	0	9.78584	10.0669	0	0	0	9.31649	10.3123	0	0	0
A0A669DN03	14-3-3 protein beta/alpha-A	LOC100689836	Oreochromis niloticus (Nile tilapia) (Tilapia nilotica)				NLLSVAYK	0	23.598	0	9.40167	9.21471	0	0	0	10.9264	10.8085	10.3902	0	0	0	0	0	0	9.57315	9.63167	9.49929	0	0	0	8.73725	8.73468	0	9.39107	0	9.57221	0	0	0	0	0	0	0	0	0	0	8.60099	0	0
A0A669DN11	Solute carrier family 25 member 13	slc25a13	Oreochromis niloticus (Nile tilapia) (Tilapia nilotica)	transmembrane transport [GO:0055085]	mitochondrial inner membrane [GO:0005743]	calcium ion binding [GO:0005509]	GELKCFSYIKHR	0.93501	-0.94375	0	0	0	8.90469	0	0	0	0	0	0	0	0	0	0	0	0	0	0	0	0	0	0	0	0	0	0	0	0	0	0	0	0	0	0	0	0	0	0	0	0
A0A669DN32	Alpha-N-acetylgalactosaminide alpha-2,6-sialyltransferase 1-like	LOC100691981	Oreochromis niloticus (Nile tilapia) (Tilapia nilotica)	protein glycosylation [GO:0006486]	Golgi apparatus [GO:0005794]; membrane [GO:0016020]	sialyltransferase activity [GO:0008373]	INGAVSKGYEEDLGNK	0.99207	-3.1244	8.87814	0	0	0	0	0	0	0	0	0	0	0	0	0	0	0	0	0	0	0	0	0	0	0	0	0	0	0	0	0	0	0	0	0	0	0	0	0	0	0
A0A669DN60	Reverse transcriptase domain-containing protein		Oreochromis niloticus (Nile tilapia) (Tilapia nilotica)				YLGIAISR	0.9607	-1.477	0	0	0	0	0	0	0	0	0	0	0	0	0	0	0	0	0	0	0	0	0	0	0	0	0	0	0	0	0	0	0	0	0	0	0	0	0	0	0	0
A0A669DNA9	Reverse transcriptase domain-containing protein		Oreochromis niloticus (Nile tilapia) (Tilapia nilotica)				FGHISGYK	0.99378	-3.138	0	0	0	0	0	0	0	0	0	0	0	0	0	0	10.3577	0	0	0	0	0	0	0	0	0	0	0	0	0	0	0	0	0	0	0	0	0	0	0	0	0
A0A669DNF6	dolichyl-diphosphooligosaccharide--protein glycotransferase (EC 2.4.99.18)	stt3a	Oreochromis niloticus (Nile tilapia) (Tilapia nilotica)	protein glycosylation [GO:0006486]	endoplasmic reticulum membrane [GO:0005789]	dolichyl-diphosphooligosaccharide-protein glycotransferase activity [GO:0004579]; metal ion binding [GO:0046872]	ELDVSYVLVIFGGLTGYSSDDINKFLWMVR	0.98796	-1.8534	0	0	0	0	0	0	0	0	0	0	12.9456	0	0	0	0	0	0	0	0	12.8924	0	0	0	0	0	0	0	0	0	0	0	0	0	0	0	0	0	0	0	0
A0A669DNL1	Doublecortin domain-containing protein		Oreochromis niloticus (Nile tilapia) (Tilapia nilotica)	intracellular signal transduction [GO:0035556]	cell projection [GO:0042995]; cytoplasm [GO:0005737]		TPTPGPR	0.99668	-4.018	10.5337	0	0	0	0	0	0	0	0	0	0	0	0	0	9.93496	0	0	10.4914	0	0	0	0	0	0	0	0	0	0	0	0	0	0	0	0	0	0	0	0	0	0
A0A669DNR8	Cell adhesion molecule 2	cadm2	Oreochromis niloticus (Nile tilapia) (Tilapia nilotica)		membrane [GO:0016020]		SSLQLQVDR	0.95131	-1.266	0	0	0	0	13.0523	0	0	0	0	0	0	0	0	0	0	0	0	0	0	0	0	0	0	0	0	0	0	0	0	0	0	0	0	12.9029	0	0	0	0	0	11.6618
A0A669DP98	Tight junction protein 1b		Oreochromis niloticus (Nile tilapia) (Tilapia nilotica)	regulation of apoptotic process [GO:0042981]	bicellular tight junction [GO:0005923]; plasma membrane [GO:0005886]		RQQQQRSGR	0.93775	-0.93523	0	0	0	0	0	9.05246	0	0	0	0	0	0	0	0	0	0	0	0	0	0	0	0	0	0	0	0	0	0	0	0	0	0	0	0	0	0	0	9.86304	0	0
A0A669DPE8	GPI ethanolamine phosphate transferase 2	PIGG	Oreochromis niloticus (Nile tilapia) (Tilapia nilotica)	GPI anchor biosynthetic process [GO:0006506]	endoplasmic reticulum membrane [GO:0005789]	mannose-ethanolamine phosphotransferase activity [GO:0051377]	LPQPLFK	0.99975	-1.5073	0	0	0	0	0	0	0	0	0	0	0	0	0	0	0	0	0	0	0	0	0	0	0	0	0	0	0	0	0	0	0	0	0	0	0	0	0	0	0	0
A0A669DPH6	Replication protein A subunit	rpa1	Oreochromis niloticus (Nile tilapia) (Tilapia nilotica)	DNA recombination [GO:0006310]; DNA repair [GO:0006281]; DNA replication [GO:0006260]	PML body [GO:0016605]	DNA binding [GO:0003677]; metal ion binding [GO:0046872]	LRGWYDK	0.98357	-1.6243	0	0	9.59408	0	0	0	0	0	0	0	0	0	0	0	0	0	0	0	0	0	0	0	0	0	0	0	0	0	0	0	0	0	0	0	0	0	0	0	0	0
A0A669DPL8	Complement factor H	LOC100710693	Oreochromis niloticus (Nile tilapia) (Tilapia nilotica)				FSPGETIR	0.99433	-2.9884	0	0	0	0	0	0	0	0	0	0	0	0	0	0	0	0	0	0	0	0	0	0	0	0	0	0	0	0	0	0	0	0	0	0	0	0	0	0	0	0
A0A669DPM4	C2H2-type domain-containing protein		Oreochromis niloticus (Nile tilapia) (Tilapia nilotica)				YTAGLSR	0.9995	-1.5073	0	0	0	0	0	0	0	13.6774	0	0	0	0	11.2019	0	0	0	0	0	0	0	0	0	0	0	0	0	0	0	0	0	0	0	12.3696	0	0	0	0	0	0	0
A0A669DPN4	Transcription factor 15	LOC100694468	Oreochromis niloticus (Nile tilapia) (Tilapia nilotica)			protein dimerization activity [GO:0046983]	GLGPLRMR	0.97876	-1.563	0	0	0	9.41711	0	0	0	0	0	0	0	0	0	0	0	0	0	0	0	0	0	0	0	0	0	0	0	0	0	0	0	0	0	0	0	0	0	0	0	0
A0A669DPV7	Ankyrin repeat and sterile alpha motif domain containing 1B		Oreochromis niloticus (Nile tilapia) (Tilapia nilotica)				SVSNPSMDQK	0.94908	-1.277	0	0	0	0	0	0	0	0	0	0	0	0	0	0	0	0	0	0	0	0	0	0	0	0	0	0	0	0	0	0	0	0	0	0	0	0	0	0	0	0
A0A669DPW8	Tr-type G domain-containing protein	dmc1	Oreochromis niloticus (Nile tilapia) (Tilapia nilotica)			GTP binding [GO:0005525]; GTPase activity [GO:0003924]	KVGFNPK	0.99453	-2.7275	0	0	0	0	0	0	0	12.1728	0	0	0	0	0	0	0	0	0	0	0	0	0	0	0	0	0	0	0	0	0	0	0	0	0	0	0	0	0	0	0	0
A0A669DPX0	Leptin receptor	lepr	Oreochromis niloticus (Nile tilapia) (Tilapia nilotica)		membrane [GO:0016020]		SSGGTCLDILCR	0.99523	-2.9044	0	9.4514	0	0	0	0	0	0	0	0	0	0	0	0	0	0	9.98925	0	0	0	0	0	0	0	0	0	0	0	0	0	0	0	0	0	0	0	0	0	0	0
A0A669DPY0	Calpain 5b		Oreochromis niloticus (Nile tilapia) (Tilapia nilotica)	proteolysis [GO:0006508]		calcium-dependent cysteine-type endopeptidase activity [GO:0004198]	CVFLRKELK	0.99154	-2.0781	0	0	0	0	8.82674	8.92241	0	8.28804	0	0	0	0	0	0	0	0	0	0	0	0	0	0	0	0	0	0	0	0	0	0	0	0	0	0	0	0	0	0	0	0
A0A669DPZ6	Uncharacterized protein		Oreochromis niloticus (Nile tilapia) (Tilapia nilotica)				FTDHYCK	1.005	-1.5073	0	0	0	0	0	0	0	0	0	0	0	0	0	0	0	0	0	0	0	0	0	0	0	0	0	0	0	0	0	0	0	0	0	0	0	0	0	0	0	0
A0A669DQ67	Complement C6	c6	Oreochromis niloticus (Nile tilapia) (Tilapia nilotica)	complement activation, classical pathway [GO:0006958]; cytolysis [GO:0019835]; innate immune response [GO:0045087]	extracellular region [GO:0005576]; membrane attack complex [GO:0005579]		AACDAGTLDK	0.95162	-1.4314	0	0	0	0	0	0	0	0	0	0	0	0	0	0	0	0	0	0	0	0	0	0	0	0	0	0	0	0	0	0	0	0	0	0	0	0	0	0	0	0
A0A669DQA6	IQ motif containing K		Oreochromis niloticus (Nile tilapia) (Tilapia nilotica)				WQRSSILR	0.98581	-1.5925	0	0	0	0	0	0	0	0	0	0	0	0	0	0	0	0	0	0	0	0	0	0	0	0	0	0	0	0	0	0	0	0	0	0	0	0	0	9.67603	0	0
A0A669DQB3	Tetraspanin	LOC100711712	Oreochromis niloticus (Nile tilapia) (Tilapia nilotica)		membrane [GO:0016020]		ENTFLLK	0.98742	-1.5073	0	0	0	0	0	0	0	0	0	0	0	0	0	0	0	0	0	0	0	0	0	0	0	0	0	0	0	0	0	0	0	0	0	0	0	0	0	0	0	0
A0A669DQC3	Down syndrome cell adhesion molecule	LOC100693769	Oreochromis niloticus (Nile tilapia) (Tilapia nilotica)	axon guidance [GO:0007411]; cell adhesion [GO:0007155]	plasma membrane [GO:0005886]		AGPAAAR	0.94163	-0.88968	0	0	0	9.3997	0	0	0	0	0	0	0	0	0	0	0	0	0	0	0	0	0	0	0	0	0	0	0	0	0	0	0	0	0	0	0	0	0	0	0	0
A0A669DQG3	1-phosphatidylinositol 4-kinase (EC 2.7.1.67)		Oreochromis niloticus (Nile tilapia) (Tilapia nilotica)	phosphatidylinositol phosphate biosynthetic process [GO:0046854]; phosphatidylinositol-mediated signaling [GO:0048015]; phosphorylation [GO:0016310]		kinase activity [GO:0016301]	ALGHIAVALRDTPR	0.99985	-4.3876	0	0	12.9128	0	0	0	0	0	0	0	0	0	0	0	0	0	0	0	0	0	0	0	0	0	0	0	0	0	0	0	0	0	0	0	0	0	0	0	0	0
A0A669DQI8	Leucine-rich repeat and transmembrane domain-containing protein 2	LOC102081495	Oreochromis niloticus (Nile tilapia) (Tilapia nilotica)		membrane [GO:0016020]		YRPVSVRR	0.98704	-1.7262	0	0	0	0	0	0	8.89403	0	0	0	0	0	0	0	0	0	0	0	0	0	0	0	0	0	0	0	0	0	0	0	0	0	0	0	0	0	0	0	0	0
A0A669DQL6	polynucleotide adenylyltransferase (EC 2.7.7.19)	LOC100690689	Oreochromis niloticus (Nile tilapia) (Tilapia nilotica)			RNA adenylyltransferase activity [GO:1990817]	DDDGESK	0.999	-1.5073	0	0	0	0	0	0	0	13.1866	0	0	0	0	0	0	0	0	0	0	0	0	0	0	0	0	0	0	0	0	0	0	0	0	0	0	0	0	0	0	0	0
A0A669DQN4	Transcription factor 20	tcf20	Oreochromis niloticus (Nile tilapia) (Tilapia nilotica)			metal ion binding [GO:0046872]	HPSYGMAEGMR	0.94211	-1.1178	0	0	0	0	0	0	0	9.87911	9.70745	0	0	0	0	0	0	9.30943	0	9.22882	0	0	0	0	0	0	0	10.3567	0	0	0	0	0	0	0	0	0	0	0	0	0	0
A0A669DQR2	Hepatocyte cell adhesion molecule	HEPACAM	Oreochromis niloticus (Nile tilapia) (Tilapia nilotica)		membrane [GO:0016020]		VLTDTTICLK	0.94027	-0.89602	0	0	0	0	9.76112	9.51665	0	0	0	0	0	0	0	0	0	0	0	0	0	0	0	0	0	0	0	0	0	0	0	0	0	0	0	0	0	0	0	0	0	0
A0A669DR00	Zinc finger, MYND-type containing 11		Oreochromis niloticus (Nile tilapia) (Tilapia nilotica)			metal ion binding [GO:0046872]	THTVEPK	1.0048	-1.5073	0	0	12.7663	0	0	14.6179	0	0	0	0	0	11.6913	0	0	0	0	11.2661	11.2718	0	0	0	0	10.998	0	10.4226	0	0	0	0	0	0	0	11.8572	0	0	12.0901	0	0	0	0
A0A669DR11	Zinc finger HIT-type containing 6	ZNHIT6	Oreochromis niloticus (Nile tilapia) (Tilapia nilotica)				TSGCSGVRNK	0.94949	-1.2818	0	0	0	0	0	0	0	9.55911	0	0	0	0	0	0	0	0	0	0	0	0	0	0	0	0	0	0	0	0	0	0	0	0	0	0	0	0	0	0	0	0
A0A669DR32	Adhesion G-protein coupled receptor D2	LOC102082324	Oreochromis niloticus (Nile tilapia) (Tilapia nilotica)	cell surface receptor signaling pathway [GO:0007166]	membrane [GO:0016020]	G protein-coupled receptor activity [GO:0004930]	ESALSQQENVK	0.9932	-3.7918	0	0	0	0	0	0	0	0	0	0	0	0	0	0	0	0	0	0	0	0	0	0	0	0	0	0	0	0	0	0	0	0	0	0	0	0	0	0	0	0
A0A669DR63	DNA helicase (EC 3.6.4.12)		Oreochromis niloticus (Nile tilapia) (Tilapia nilotica)		nucleus [GO:0005634]	ATP binding [GO:0005524]; ATP-dependent chromatin remodeler activity [GO:0140658]; helicase activity [GO:0004386]; hydrolase activity [GO:0016787]	VGMPDAK	0.9879	-1.5073	0	12.5237	0	0	0	0	0	12.769	12.9608	0	0	0	0	0	0	0	0	0	0	10.8007	0	0	0	0	0	0	0	12.3114	12.1423	12.2178	12.4538	0	0	11.7145	0	11.9148	0	0	12.0112	0
A0A669DRB4	protein kinase C (EC 2.7.11.13)	pkn2	Oreochromis niloticus (Nile tilapia) (Tilapia nilotica)	protein phosphorylation [GO:0006468]; signal transduction [GO:0007165]	cleavage furrow [GO:0032154]; cytoplasm [GO:0005737]; midbody [GO:0030496]; nucleus [GO:0005634]	ATP binding [GO:0005524]; calcium-dependent protein kinase C activity [GO:0004698]; small GTPase binding [GO:0031267]	CPFHFSLQDFK	0.95587	-1.455	0	0	0	0	0	0	0	0	0	0	0	0	0	0	0	0	0	0	0	0	0	0	0	0	0	0	0	0	0	0	0	0	0	0	0	0	0	0	0	0
A0A669DRC1	Rho guanine nucleotide exchange factor 12	LOC100708196	Oreochromis niloticus (Nile tilapia) (Tilapia nilotica)	intracellular signal transduction [GO:0035556]; RNA processing [GO:0006396]	cytoplasm [GO:0005737]; membrane [GO:0016020]	adenosine deaminase activity [GO:0004000]; guanyl-nucleotide exchange factor activity [GO:0005085]; RNA binding [GO:0003723]	IKFPNIRPPR	0.98377	-1.6205	0	0	0	0	0	0	0	0	0	0	0	0	0	0	0	0	0	0	0	0	0	0	0	0	0	0	0	0	0	9.90204	0	0	0	0	0	0	0	0	0	0
A0A669DRF5	FA complementation group E	fance	Oreochromis niloticus (Nile tilapia) (Tilapia nilotica)	interstrand cross-link repair [GO:0036297]	Fanconi anaemia nuclear complex [GO:0043240]		SLMSGTSGTSR	0.92791	-0.63691	0	0	0	0	0	0	0	10.1893	0	0	0	0	0	0	0	0	0	0	0	0	0	0	0	0	0	0	0	0	0	0	0	0	0	0	0	0	0	0	0	0
A0A669DRG5	Coiled-coil domain containing 112	ccdc112	Oreochromis niloticus (Nile tilapia) (Tilapia nilotica)				HQERQIR	0.99371	-3.0029	0	12.81	0	0	9.26496	0	0	0	0	11.8726	10.5736	10.577	0	0	12.239	0	13.1579	0	0	11.5187	0	11.8034	11.5555	0	0	0	0	0	0	10.0736	0	0	0	0	11.2922	11.344	0	0	0	0
A0A669DRJ4	Metastasis associated 1 family member 2	mta2	Oreochromis niloticus (Nile tilapia) (Tilapia nilotica)	regulation of DNA-templated transcription [GO:0006355]	nucleus [GO:0005634]	chromatin binding [GO:0003682]; sequence-specific DNA binding [GO:0043565]; zinc ion binding [GO:0008270]	QTFILQTTK	0.97221	-1.5493	0	0	0	0	0	0	0	0	0	0	0	0	0	0	0	0	0	0	0	0	0	0	0	0	0	0	0	0	0	0	0	0	0	0	0	0	9.77142	0	0	0
A0A669DRM0	Eyes absent homolog (EC 3.1.3.48)	eya3	Oreochromis niloticus (Nile tilapia) (Tilapia nilotica)		nucleus [GO:0005634]	metal ion binding [GO:0046872]; protein tyrosine phosphatase activity [GO:0004725]	KAKIDVDGELK	0.93712	-0.90673	0	0	0	0	0	0	0	0	0	0	0	0	0	0	0	0	0	0	0	0	0	0	0	0	0	0	0	0	0	0	0	8.49861	0	0	0	0	0	0	0	0
A0A669DRN3	PDZ domain containing ring finger 3	pdzrn3	Oreochromis niloticus (Nile tilapia) (Tilapia nilotica)			metal ion binding [GO:0046872]; ubiquitin-protein transferase activity [GO:0004842]	DSGVGRTDESTR	0.99257	-3.1812	0	0	0	0	0	0	0	0	0	0	0	0	0	0	0	0	0	0	0	0	0	0	0	0	0	0	0	0	0	0	0	0	0	0	0	0	0	10.2093	0	0
A0A669DRP8	TBC1 domain family member 14	TBC1D14	Oreochromis niloticus (Nile tilapia) (Tilapia nilotica)				DPKKIQK	0.93156	-0.98403	0	0	0	0	0	0	0	0	0	0	0	0	0	0	0	0	0	0	0	0	0	0	0	0	0	0	0	0	0	9.3845	0	0	0	0	0	0	0	0	0	0
A0A669DRQ4	Sodium/glucose cotransporter 1	LOC100699559	Oreochromis niloticus (Nile tilapia) (Tilapia nilotica)		membrane [GO:0016020]	transmembrane transporter activity [GO:0022857]	EEEEELQK	0.95737	-1.4695	0	0	0	0	0	0	0	0	0	0	0	0	0	0	0	0	0	0	0	0	0	0	0	0	0	0	0	0	0	0	0	0	0	0	0	0	0	0	0	0
A0A669DRT0	Amyloid beta (A4) precursor protein-binding, family A, member 2b		Oreochromis niloticus (Nile tilapia) (Tilapia nilotica)				ALPARQRPHRYPK	0.99771	-2.5516	0	0	0	0	0	0	0	0	0	0	0	0	0	0	0	0	0	0	0	0	0	0	0	0	0	0	0	0	0	0	0	0	0	0	0	0	0	0	0	0
A0A669DRY1	Reverse transcriptase domain-containing protein		Oreochromis niloticus (Nile tilapia) (Tilapia nilotica)				TFLFVKAYS	0.97699	-1.5718	9.05845	0	0	0	0	0	0	0	0	0	0	0	0	0	0	0	0	0	0	0	0	0	0	0	0	0	0	0	0	0	0	0	0	0	0	0	0	0	0	0
A0A669DS34	Neuroplastin	LOC100708842	Oreochromis niloticus (Nile tilapia) (Tilapia nilotica)		membrane [GO:0016020]		AKPDITGHK	0.9293	-1.0716	0	0	11.1698	0	0	0	11.2949	0	0	0	0	0	0	0	0	0	0	0	0	0	0	0	0	0	0	0	0	0	0	0	0	0	0	0	0	0	11.016	0	0	0
A0A669DSC7	Uncharacterized protein		Oreochromis niloticus (Nile tilapia) (Tilapia nilotica)		membrane [GO:0016020]		EMMMTGNK	0.96112	-1.4747	0	0	0	0	0	0	0	0	0	0	0	0	0	0	0	0	0	0	0	0	0	0	0	0	0	0	0	0	0	0	0	0	0	0	0	0	0	0	0	0
A0A669DSF9	BAR/IMD domain containing adaptor protein 2 like 1a		Oreochromis niloticus (Nile tilapia) (Tilapia nilotica)	plasma membrane organization [GO:0007009]			TYTESVVSNR	0.95099	-1.3424	0	0	0	0	0	0	0	0	0	0	0	0	0	0	0	0	0	0	0	0	0	0	0	0	0	0	0	0	0	0	0	0	0	0	0	0	0	0	0	0
A0A669DSH0	Phostensin domain-containing protein		Oreochromis niloticus (Nile tilapia) (Tilapia nilotica)			phosphatase binding [GO:0019902]	SQQTQTVSTSAK	0.95463	-1.3776	0	9.57471	0	0	0	0	0	0	0	0	0	0	0	0	0	0	0	0	0	0	0	0	0	0	0	0	8.99769	0	0	0	0	0	0	0	0	0	0	0	0	0
A0A669DSK3	Vesicular glutamate transporter 1	LOC100692232	Oreochromis niloticus (Nile tilapia) (Tilapia nilotica)		membrane [GO:0016020]	transmembrane transporter activity [GO:0022857]	CIFDACR	0.99875	-1.5073	0	0	0	14.6544	0	0	0	13.1123	0	0	0	0	0	0	0	0	0	0	0	0	0	0	0	0	0	0	0	0	0	0	0	0	0	0	0	0	0	0	0	0
A0A669DSN2	AMP deaminase (EC 3.5.4.6)	ampd1	Oreochromis niloticus (Nile tilapia) (Tilapia nilotica)	IMP salvage [GO:0032264]		AMP deaminase activity [GO:0003876]; metal ion binding [GO:0046872]	GRNFVPHFGK	0.95093	-1.4195	0	0	0	0	0	0	0	9.34145	0	0	0	0	0	0	0	0	0	0	0	0	0	0	0	0	0	0	0	0	0	0	0	0	0	0	0	0	0	0	0	0
A0A669DSR8	Diacylglycerol kinase (DAG kinase) (EC 2.7.1.107)		Oreochromis niloticus (Nile tilapia) (Tilapia nilotica)	cell development [GO:0048468]; glycerolipid metabolic process [GO:0046486]; phosphorylation [GO:0016310]; protein kinase C-activating G protein-coupled receptor signaling pathway [GO:0007205]		ATP binding [GO:0005524]; calcium ion binding [GO:0005509]; diacylglycerol kinase activity [GO:0004143]	NRLLFLIYR	0.98456	-1.6186	0	0	0	10.4931	10.4784	10.3217	0	8.50827	0	0	0	0	0	0	0	0	0	0	0	0	0	0	0	0	0	0	0	0	0	0	0	0	9.15621	9.62996	0	9.68834	0	0	0	0
A0A669DST4	Tenomodulin	tnmd	Oreochromis niloticus (Nile tilapia) (Tilapia nilotica)		membrane [GO:0016020]		DVEAGKVKK	0.93184	-1.0076	0	0	0	0	0	0	0	0	0	0	0	0	0	0	0	0	0	0	0	0	0	0	0	0	0	0	0	0	8.85543	0	0	0	0	0	0	0	0	0	0	0
A0A669DSU1	Ankyrin repeat domain 6b		Oreochromis niloticus (Nile tilapia) (Tilapia nilotica)				APQVQSFVR	0.9942	-3.0381	0	0	0	0	0	0	0	0	0	0	0	0	0	0	0	0	0	0	0	0	0	0	0	0	0	0	0	0	0	0	0	0	0	0	0	0	0	0	0	0
A0A669DSZ3	SGNH_hydro domain-containing protein		Oreochromis niloticus (Nile tilapia) (Tilapia nilotica)				DMVNNLK	0.985	-1.5073	0	0	0	0	0	9.26833	0	0	0	0	0	0	0	0	0	0	0	0	0	0	0	0	0	0	0	0	0	0	0	0	0	0	0	0	0	0	0	0	0	0
A0A669DT21	Si:ch211-155i14.1		Oreochromis niloticus (Nile tilapia) (Tilapia nilotica)				EPGSTNGSYGWK	0.99252	-3.1066	0	0	0	0	0	0	0	0	0	0	0	0	0	0	0	0	0	0	0	0	0	0	0	0	0	0	0	0	0	0	0	0	0	0	0	0	0	0	0	0
A0A669DT35	Eukaryotic translation initiation factor 3 subunit C (eIF3c) (Eukaryotic translation initiation factor 3 subunit 8)	EIF3C EIF3S8	Oreochromis niloticus (Nile tilapia) (Tilapia nilotica)	formation of cytoplasmic translation initiation complex [GO:0001732]	eukaryotic 43S preinitiation complex [GO:0016282]; eukaryotic 48S preinitiation complex [GO:0033290]; eukaryotic translation initiation factor 3 complex [GO:0005852]	RNA binding [GO:0003723]; translation initiation factor activity [GO:0003743]; translation initiation factor binding [GO:0031369]	LGNLVENNER	0.94179	-1.1192	8.7211	0	0	0	0	0	0	0	0	0	0	0	0	0	0	0	0	0	0	0	0	0	0	0	0	0	0	0	0	0	0	0	0	0	0	0	0	0	0	0
A0A669DT51	Large tumor suppressor kinase 2	lats2	Oreochromis niloticus (Nile tilapia) (Tilapia nilotica)	protein phosphorylation [GO:0006468]	cytoplasm [GO:0005737]	ATP binding [GO:0005524]; protein serine/threonine kinase activity [GO:0004674]	EGLKQPAK	0.9783	-1.583	0	0	0	0	0	0	0	0	0	0	0	0	0	0	0	0	0	0	0	0	0	0	0	0	0	0	0	8.22511	0	0	0	0	0	0	0	0	0	0	0	0
A0A669DT97	Reverse transcriptase domain-containing protein		Oreochromis niloticus (Nile tilapia) (Tilapia nilotica)			2-oxoglutarate-dependent dioxygenase activity [GO:0016706]; methyltransferase activity [GO:0008168]	AAGPDGIPR	0.95347	-1.3291	0	0	0	0	0	0	0	0	0	0	0	0	0	0	0	0	0	0	0	0	0	0	0	0	0	0	0	0	0	0	0	0	0	0	0	0	0	0	0	0
A0A669DTC7	Hyaluronan mediated motility receptor	hmmr	Oreochromis niloticus (Nile tilapia) (Tilapia nilotica)		cytoplasm [GO:0005737]; spindle [GO:0005819]	hyaluronic acid binding [GO:0005540]	AFQHDKENR	0.98911	-1.7063	0	9.09958	0	0	0	0	0	0	0	0	0	0	0	0	0	0	0	0	0	0	0	0	0	0	0	0	0	0	0	0	0	0	0	0	0	0	0	0	0	0
A0A669DTD1	Arylsulfatase B	ARSB	Oreochromis niloticus (Nile tilapia) (Tilapia nilotica)		cellular anatomical entity [GO:0110165]	sulfuric ester hydrolase activity [GO:0008484]	LLPQLMK	0.99304	-1.5073	0	0	0	0	0	0	0	0	0	0	0	0	0	0	0	0	0	0	0	0	0	0	0	0	0	0	0	0	0	0	0	0	0	0	0	0	0	0	0	0
A0A669DTJ6	EGF containing fibulin extracellular matrix protein 1	EFEMP1	Oreochromis niloticus (Nile tilapia) (Tilapia nilotica)	animal organ development [GO:0048513]		calcium ion binding [GO:0005509]	DIDECALYDDACK	0.98919	-2.0137	0	0	0	0	0	0	0	0	0	0	0	0	0	0	0	0	0	0	0	0	0	0	0	0	0	0	0	0	0	0	0	0	0	0	0	0	0	0	0	0
A0A669DTJ9	B double prime 1, subunit of RNA polymerase III transcription initiation factor IIIB	bdp1	Oreochromis niloticus (Nile tilapia) (Tilapia nilotica)				CRKEISSAEK	0.98944	-2.0635	0	0	0	0	0	0	0	0	0	0	0	0	0	0	0	0	0	0	0	0	0	0	0	0	0	0	0	0	0	0	0	0	0	0	0	0	0	0	0	0
A0A669DTN0	WD repeat domain 7	WDR7	Oreochromis niloticus (Nile tilapia) (Tilapia nilotica)				EHLLDEDEDEEEEMRR	0.99865	-2.2675	0	0	0	0	0	0	0	0	0	0	0	0	0	0	0	0	0	0	0	0	0	0	0	0	0	0	0	0	0	0	9.70236	0	0	0	0	0	0	0	0	0
A0A669DTU0	Kelch like family member 29	klhl29	Oreochromis niloticus (Nile tilapia) (Tilapia nilotica)				ELNQQRR	0.99524	-2.9342	0	0	0	0	0	0	0	0	11.4121	0	0	0	0	0	0	0	0	9.6062	0	0	0	0	0	0	0	0	0	0	0	0	0	0	0	0	0	0	0	0	0	10.6984
A0A669DTV1	Metabotropic glutamate receptor 4	GRM4	Oreochromis niloticus (Nile tilapia) (Tilapia nilotica)		plasma membrane [GO:0005886]	G protein-coupled receptor activity [GO:0004930]	AWIGCHK	1.004	-1.5073	0	0	0	0	11.1611	11.0656	0	0	0	0	0	0	0	0	0	0	0	0	0	0	0	0	0	0	0	0	0	0	0	0	0	0	0	0	0	0	0	0	0	0
A0A669DTW4	Uncharacterized protein		Oreochromis niloticus (Nile tilapia) (Tilapia nilotica)				ERSLRFLGK	0.93339	-1.0076	0	0	0	0	0	0	0	0	0	0	0	0	0	0	0	0	0	0	0	0	0	0	0	0	0	0	0	0	0	0	0	0	0	0	0	0	0	0	0	0
A0A669DTY6	carnitine O-palmitoyltransferase (EC 2.3.1.21)		Oreochromis niloticus (Nile tilapia) (Tilapia nilotica)	fatty acid beta-oxidation [GO:0006635]	mitochondrial outer membrane [GO:0005741]	carnitine O-palmitoyltransferase activity [GO:0004095]	AAEKHQNMYRLAMTGSGIDR	0.32258	-0.34828	0	0	9.64431	0	0	0	0	0	0	0	0	9.21053	0	0	0	0	0	0	0	0	0	0	0	0	0	0	0	0	0	0	0	0	0	0	0	0	0	0	0	0
A0A669DU16	Uncharacterized LOC102080283	LOC102080283	Oreochromis niloticus (Nile tilapia) (Tilapia nilotica)			GTP binding [GO:0005525]	TIKDLEEK	0.96508	-1.5095	0	0	0	0	10.2298	0	0	0	0	0	0	0	0	10.1441	0	0	11.0868	0	0	0	0	0	0	0	0	0	11.0162	0	0	0	0	0	0	0	0	0	10.3123	0	0	0
A0A669DU66	Polycystic kidney and hepatic disease 1 (autosomal recessive)-like 1		Oreochromis niloticus (Nile tilapia) (Tilapia nilotica)				IQEVTPGR	0.95772	-1.4717	0	0	0	0	0	0	0	0	0	0	0	0	0	0	0	0	0	0	0	0	0	0	9.63786	0	0	0	0	0	0	0	0	0	0	0	0	0	0	0	0	0
A0A669DUC8	Carnitine O-acetyltransferase	LOC100707255	Oreochromis niloticus (Nile tilapia) (Tilapia nilotica)			acyltransferase activity [GO:0016746]	VSNELYR	1.0076	-1.5073	0	0	0	9.19862	0	0	0	0	0	0	0	0	0	0	0	0	0	0	0	0	0	0	0	0	0	0	0	0	0	0	0	0	0	0	0	0	0	0	0	0
A0A669DUD9	Putative nuclease HARBI1 (Harbinger transposase-derived nuclease)		Oreochromis niloticus (Nile tilapia) (Tilapia nilotica)		cytoplasm [GO:0005737]; nucleus [GO:0005634]	hydrolase activity [GO:0016787]; metal ion binding [GO:0046872]	RFWTRPGR	0.985	-1.7403	0	0	0	0	0	0	0	0	0	0	0	0	0	0	0	0	0	0	0	0	0	0	0	0	0	0	0	0	0	0	0	0	0	0	0	0	9.88625	0	0	0
A0A669DUG1	Kinesin light chain	klc2	Oreochromis niloticus (Nile tilapia) (Tilapia nilotica)		cytoplasm [GO:0005737]; kinesin complex [GO:0005871]; microtubule [GO:0005874]		RASSLNFLNK	0.98742	-1.7241	0	0	0	0	10.3363	0	0	0	0	0	0	0	0	0	0	0	0	0	0	0	0	0	0	0	0	0	0	0	0	0	0	0	0	0	0	0	0	0	0	0
A0A669DUP0	RAB35, member RAS oncogene family	rab35	Oreochromis niloticus (Nile tilapia) (Tilapia nilotica)			GTP binding [GO:0005525]; GTPase activity [GO:0003924]	TVEINGEK	0.95514	-1.4045	0	0	0	0	0	0	0	0	0	0	0	0	0	0	0	0	0	0	0	0	0	0	0	0	0	0	0	0	0	0	0	0	0	0	0	0	0	0	0	0
A0A669DUQ5	Pleckstrin homology domain containing, family H (with MyTH4 domain) member 2		Oreochromis niloticus (Nile tilapia) (Tilapia nilotica)		cytoskeleton [GO:0005856]		LNQDTGMRK	0.98777	-1.7703	0	0	0	0	0	0	0	0	0	0	0	0	0	0	0	0	0	0	0	0	0	0	0	0	0	0	0	0	0	0	0	0	0	0	0	0	0	0	0	0
A0A669DUR7	UTP3 small subunit processome component		Oreochromis niloticus (Nile tilapia) (Tilapia nilotica)				DESKPVEKEER	0.94776	-1.2909	0	0	0	9.90366	9.57389	0	9.34521	0	0	0	0	0	0	0	0	0	0	0	0	0	0	0	0	0	0	0	0	0	0	0	0	0	0	0	0	0	0	0	0	0
A0A669DUY5	Vesicle-trafficking protein SEC22b-B-like	LOC100703038	Oreochromis niloticus (Nile tilapia) (Tilapia nilotica)	endoplasmic reticulum to Golgi vesicle-mediated transport [GO:0006888]; retrograde vesicle-mediated transport, Golgi to endoplasmic reticulum [GO:0006890]	endoplasmic reticulum membrane [GO:0005789]; endoplasmic reticulum-Golgi intermediate compartment membrane [GO:0033116]; Golgi apparatus [GO:0005794]; melanosome [GO:0042470]	SNAP receptor activity [GO:0005484]	RTLANINK	0.98748	-1.7312	0	0	0	0	0	0	0	0	0	0	0	0	0	0	0	0	0	0	0	0	0	0	0	0	0	0	0	0	0	0	0	0	0	0	0	0	11.1724	0	0	0
A0A669DVH6	Replication timing regulatory factor 1	rif1	Oreochromis niloticus (Nile tilapia) (Tilapia nilotica)	cell cycle [GO:0007049]; regulation of DNA metabolic process [GO:0051052]	chromosome, telomeric region [GO:0000781]; nucleus [GO:0005634]		LLGKLLHR	0.98637	-1.5996	0	0	0	0	0	0	0	0	0	0	0	0	0	0	0	0	0	0	0	0	0	0	0	0	0	0	0	0	0	0	0	0	0	0	0	0	0	0	0	0
A0A669DVJ8	Uncharacterized LOC102076966	LOC102076966	Oreochromis niloticus (Nile tilapia) (Tilapia nilotica)	protein phosphorylation [GO:0006468]	membrane [GO:0016020]	ATP binding [GO:0005524]; protein kinase activity [GO:0004672]	NSSHMSDR	0.99417	-2.9887	0	0	0	0	0	0	0	0	0	0	0	0	0	0	0	0	0	0	0	0	0	0	0	0	0	0	0	0	0	9.60198	0	0	0	0	0	0	0	0	0	0
A0A669DVK4	WD repeat domain 46	wdr46	Oreochromis niloticus (Nile tilapia) (Tilapia nilotica)		nucleolus [GO:0005730]		LRDIIAR	0.98429	-1.6243	0	0	0	0	0	0	0	0	0	0	0	0	0	0	0	0	0	0	0	0	0	0	0	0	0	0	0	9.28836	0	0	0	0	0	0	0	0	0	0	0	0
A0A669DVP1	Protein CASP	cux1	Oreochromis niloticus (Nile tilapia) (Tilapia nilotica)	intra-Golgi vesicle-mediated transport [GO:0006891]	Golgi membrane [GO:0000139]		VILSNKMAR	0.95231	-1.4099	0	0	0	0	0	0	0	0	0	0	0	0	0	0	0	0	0	0	0	0	0	0	0	0	0	0	0	0	0	0	0	0	0	0	0	0	0	0	0	0
A0A669DVQ0	Neuronal tyrosine phosphorylated phosphoinositide-3-kinase adaptor 1		Oreochromis niloticus (Nile tilapia) (Tilapia nilotica)	neuron projection morphogenesis [GO:0048812]; phosphatidylinositol 3-kinase signaling [GO:0014065]			KVPPLKPKR	0.99722	-2.5627	11.4114	0	0	0	0	0	0	0	0	0	0	0	0	0	0	0	0	0	0	0	8.47836	0	0	0	0	0	0	0	0	0	0	0	0	0	0	0	0	0	0	0
A0A669DVW0	Tubulin alpha chain	LOC100704022	Oreochromis niloticus (Nile tilapia) (Tilapia nilotica)	microtubule-based process [GO:0007017]	cytoplasm [GO:0005737]; microtubule [GO:0005874]	GTP binding [GO:0005525]; hydrolase activity [GO:0016787]; structural constituent of cytoskeleton [GO:0005200]	DVNAAIANIK	0.93963	-0.73594	0	0	0	0	0	0	9.35973	0	0	0	0	0	0	0	0	0	0	0	0	0	0	0	0	0	0	0	0	0	0	0	0	0	0	0	0	0	0	0	0	0
A0A669DW43	Erythrocyte membrane protein band 4.1 like 2	EPB41L2	Oreochromis niloticus (Nile tilapia) (Tilapia nilotica)	cortical actin cytoskeleton organization [GO:0030866]	cytoskeleton [GO:0005856]	actin binding [GO:0003779]; structural molecule activity [GO:0005198]	HSNLMLEDHDK	0.95398	-1.4597	0	0	0	0	0	0	0	0	0	0	0	0	0	0	0	0	0	0	0	0	0	0	0	0	0	0	0	0	0	0	0	0	0	0	0	0	0	0	0	0
A0A669DW47	Delta like non-canonical Notch ligand 1	DLK1	Oreochromis niloticus (Nile tilapia) (Tilapia nilotica)	animal organ development [GO:0048513]; cell development [GO:0048468]; system development [GO:0048731]	membrane [GO:0016020]	calcium ion binding [GO:0005509]	QQREHLLR	0.9855	-1.5944	0	0	0	0	0	0	0	0	0	0	0	0	0	0	0	0	0	0	0	0	0	0	0	0	0	0	0	0	0	0	0	0	0	0	0	0	0	0	0	0
A0A669DW65	Alpha-2-macroglobulin		Oreochromis niloticus (Nile tilapia) (Tilapia nilotica)	negative regulation of peptidase activity [GO:0010466]	extracellular space [GO:0005615]	serine-type endopeptidase inhibitor activity [GO:0004867]	SFRSETSASLSVEISSYVLLAK	0.99524	-2.9356	9.53945	9.06609	8.92122	9.27312	9.30067	0	10.0154	9.93759	9.4099	0	0	0	0	0	0	0	0	0	0	0	0	0	0	0	0	0	0	0	0	0	0	0	0	0	0	0	0	0	0	0
A0A669DW82	Aryl-hydrocarbon receptor nuclear translocator 2		Oreochromis niloticus (Nile tilapia) (Tilapia nilotica)		cytoplasm [GO:0005737]; nucleus [GO:0005634]; transcription regulator complex [GO:0005667]	DNA binding [GO:0003677]; DNA-binding transcription factor activity [GO:0003700]; protein dimerization activity [GO:0046983]	ERICQKCFHEK	0.94622	-0.80573	0	0	0	0	0	0	0	0	0	0	0	0	0	0	0	0	0	0	0	0	0	0	0	0	0	0	0	0	0	0	0	0	0	0	0	0	0	0	0	0
A0A669DWD0	Arf-GAP with GTPase, ANK repeat and PH domain-containing protein 1	LOC100708930	Oreochromis niloticus (Nile tilapia) (Tilapia nilotica)			GTP binding [GO:0005525]; GTPase activator activity [GO:0005096]; GTPase activity [GO:0003924]; metal ion binding [GO:0046872]	SSERRLVR	0.93547	-0.94369	0	0	0	0	0	0	0	0	0	8.49414	0	0	0	0	0	0	0	0	0	0	0	0	0	0	0	0	0	0	0	0	0	0	0	0	0	0	0	0	0	0
A0A669DWD6	Integrin subunit beta like 1	itgbl1	Oreochromis niloticus (Nile tilapia) (Tilapia nilotica)	anatomical structure development [GO:0048856]	membrane [GO:0016020]		GSCHCGKCICNPQDWWVSGEYCECDDR	0.98895	-1.9711	0	0	0	0	0	0	11.4452	0	0	0	0	0	0	0	0	0	0	0	0	0	0	0	0	0	0	0	0	0	0	0	0	0	0	0	0	0	0	0	0	11.6474
A0A669DWJ3	Ig-like domain-containing protein		Oreochromis niloticus (Nile tilapia) (Tilapia nilotica)		membrane [GO:0016020]		KIVYVFPTAR	0.98933	-1.7965	0	0	0	0	0	0	0	0	0	0	9.80395	0	0	0	0	0	0	0	0	0	0	0	0	0	0	0	0	0	0	0	0	0	0	0	0	0	0	0	0	0
A0A669DWL9	Parvalbumin	LOC100701083	Oreochromis niloticus (Nile tilapia) (Tilapia nilotica)			calcium ion binding [GO:0005509]	IGVDAVRL	0.98951	-1.71	0	0	0	0	0	0	0	0	0	0	0	0	0	0	0	0	0	0	0	0	0	0	0	0	0	0	0	0	0	0	0	0	0	0	0	0	0	0	0	0
A0A669DWM3	Tensin-2	LOC100701985	Oreochromis niloticus (Nile tilapia) (Tilapia nilotica)		anchoring junction [GO:0070161]		ERDRETAILDDTDPLGPGGLR	0.98945	-2.0641	0	0	0	0	0	0	0	0	0	0	0	0	0	0	0	0	0	0	0	0	0	0	0	0	0	0	0	0	0	0	0	0	0	0	0	0	0	0	0	0
A0A669DWM5	Uncharacterized protein		Oreochromis niloticus (Nile tilapia) (Tilapia nilotica)				DLSMFIWR	0.95902	-1.4758	0	0	0	0	0	0	0	0	0	0	0	0	0	0	0	0	0	0	0	0	0	0	0	0	0	0	0	0	0	0	0	0	0	0	0	0	0	0	0	0
A0A669DWP0	Transmembrane protein 161B	tmem161b	Oreochromis niloticus (Nile tilapia) (Tilapia nilotica)		membrane [GO:0016020]		DIDLQLETK	0.92897	-1.0716	0	0	0	0	0	0	0	0	0	0	0	0	0	0	0	0	0	0	0	0	0	0	0	0	0	0	0	0	0	0	0	0	0	0	0	0	0	0	0	0
A0A669DWR0	NAD(+) kinase (EC 2.7.1.23)	nadk	Oreochromis niloticus (Nile tilapia) (Tilapia nilotica)	NAD metabolic process [GO:0019674]; NADP biosynthetic process [GO:0006741]; phosphorylation [GO:0016310]		NAD+ kinase activity [GO:0003951]	VLKENWEK	0.98648	-1.7488	0	0	0	0	0	0	0	0	0	0	0	0	0	0	0	0	0	0	0	0	0	0	0	0	0	0	0	0	0	0	0	0	0	0	0	0	0	0	0	0
A0A669DWS6	non-specific serine/threonine protein kinase (EC 2.7.11.1)		Oreochromis niloticus (Nile tilapia) (Tilapia nilotica)	protein phosphorylation [GO:0006468]; proteolysis [GO:0006508]		ATP binding [GO:0005524]; magnesium ion binding [GO:0000287]; metalloendopeptidase activity [GO:0004222]; protein serine/threonine kinase activity [GO:0004674]	VPREDRLAK	0.94082	-0.93152	0	0	0	9.98342	10.0163	10.0516	0	0	0	0	0	0	0	0	0	0	0	0	0	0	0	0	0	0	0	0	0	0	0	0	0	0	0	0	8.68478	8.68615	10.8652	10.8907	10.9127	0
A0A669DWS8	Transcription initiation factor TFIID subunit 4	LOC109202667	Oreochromis niloticus (Nile tilapia) (Tilapia nilotica)	DNA-templated transcription initiation [GO:0006352]; transcription by RNA polymerase II [GO:0006366]	transcription factor TFIID complex [GO:0005669]	protein heterodimerization activity [GO:0046982]	RITTPRR	0.93113	-0.98403	0	0	0	0	0	0	0	0	0	0	0	0	0	0	0	0	0	0	0	0	0	0	10.5307	0	0	0	0	0	0	0	0	0	0	0	12.0001	0	0	0	0	0
A0A669DWT2	G_PROTEIN_RECEP_F3_4 domain-containing protein		Oreochromis niloticus (Nile tilapia) (Tilapia nilotica)		membrane [GO:0016020]		NFPSLLPSQR	0.95419	-1.4413	0	8.48969	0	0	0	0	0	0	0	0	0	0	0	0	0	0	0	0	0	0	0	0	0	0	0	0	0	0	0	0	0	0	0	0	0	0	0	0	0	0
A0A669DWU8	Solute carrier family 39 member 1		Oreochromis niloticus (Nile tilapia) (Tilapia nilotica)		membrane [GO:0016020]	metal ion transmembrane transporter activity [GO:0046873]	EVKVSILFVLKHK	0.94167	-1.1176	11.0357	0	0	0	0	0	0	0	0	0	0	0	0	0	0	0	0	0	0	0	0	0	0	9.86511	0	0	0	0	0	0	0	0	0	0	0	0	0	0	0	0
A0A669DWX1	DDE Tnp4 domain-containing protein		Oreochromis niloticus (Nile tilapia) (Tilapia nilotica)		nucleus [GO:0005634]	hydrolase activity [GO:0016787]; metal ion binding [GO:0046872]	NIIERTFGILK	0.97151	-1.5285	0	8.52313	0	0	0	0	0	0	0	0	0	0	0	0	0	0	0	0	0	0	0	0	0	0	0	0	0	0	0	0	0	0	0	0	0	0	0	0	0	0
A0A669DWX6	SCY1 like pseudokinase 2	SCYL2	Oreochromis niloticus (Nile tilapia) (Tilapia nilotica)	protein phosphorylation [GO:0006468]		ATP binding [GO:0005524]; protein kinase activity [GO:0004672]	DNLQKSQFYK	0.94923	-1.3012	0	0	0	8.58864	0	0	0	0	0	0	0	0	0	0	0	0	0	0	0	0	0	0	0	0	0	0	0	0	0	0	0	0	0	0	0	0	0	0	0	0
A0A669DWY6	Voltage-dependent R-type calcium channel subunit alpha-1E	LOC100702145	Oreochromis niloticus (Nile tilapia) (Tilapia nilotica)	regulation of ion transmembrane transport [GO:0034765]	voltage-gated calcium channel complex [GO:0005891]	metal ion binding [GO:0046872]; voltage-gated calcium channel activity [GO:0005245]	AVRVLRPLK	0.98702	-1.7488	0	0	0	0	0	0	0	0	0	0	0	0	0	0	0	0	0	0	0	0	0	0	0	0	0	0	0	0	0	0	0	0	0	0	0	0	0	0	0	0
A0A669DX07	Liprin-alpha-3	PPFIA3	Oreochromis niloticus (Nile tilapia) (Tilapia nilotica)		cytoplasm [GO:0005737]		NRQLQER	0.98414	-1.6243	0	0	0	0	13.556	0	0	0	0	0	0	0	0	0	0	0	0	0	0	0	0	0	0	0	0	0	0	0	0	0	0	0	0	0	0	0	0	0	0	0
A0A669DX85	PMS1 homolog 2, mismatch repair system component	pms2	Oreochromis niloticus (Nile tilapia) (Tilapia nilotica)	mismatch repair [GO:0006298]	mismatch repair complex [GO:0032300]; nucleus [GO:0005634]	ATP binding [GO:0005524]; ATP hydrolysis activity [GO:0016887]; ATP-dependent DNA damage sensor activity [GO:0140664]; mismatched DNA binding [GO:0030983]	SPLKYTR	0.98221	-1.6243	0	0	0	0	0	0	0	0	0	0	0	0	0	9.21245	0	0	0	0	0	0	0	0	0	0	0	0	0	0	0	0	0	0	0	0	0	0	0	0	0	0
A0A669DX97	Mucin-5AC	LOC102081017	Oreochromis niloticus (Nile tilapia) (Tilapia nilotica)				DCDSPHPLR	0.97139	-1.5309	0	10.8114	0	0	0	0	0	0	0	0	0	0	0	0	0	0	0	0	0	0	0	0	0	0	0	0	0	0	0	0	0	0	0	0	0	0	0	0	0	0
A0A669DXD8	Zinc-binding protein A33	LOC100700721	Oreochromis niloticus (Nile tilapia) (Tilapia nilotica)			zinc ion binding [GO:0008270]	LFCLIDK	0.998	-1.5073	9.4102	0	0	0	0	0	0	0	0	0	0	0	0	0	0	0	0	0	0	0	0	0	0	0	0	0	0	0	0	0	0	0	0	0	0	0	0	0	0	0
A0A669DXJ6	Hook microtubule tethering protein 3	HOOK3	Oreochromis niloticus (Nile tilapia) (Tilapia nilotica)	cytoplasmic microtubule organization [GO:0031122]; cytoskeleton-dependent intracellular transport [GO:0030705]	cytoplasm [GO:0005737]; microtubule [GO:0005874]	microtubule binding [GO:0008017]	ISNLKKILK	0.9893	-1.9651	0	0	0	0	0	0	0	0	0	0	0	0	0	0	0	0	0	0	0	0	0	0	0	0	0	0	0	0	0	0	0	0	0	0	0	0	0	0	0	0
A0A669DXU6	Transmembrane protein 56-B	LOC100693154	Oreochromis niloticus (Nile tilapia) (Tilapia nilotica)		membrane [GO:0016020]		AGAPQENGKMD	0.97338	-1.547	0	0	0	0	0	0	0	9.43858	9.3433	0	0	0	0	0	0	0	0	0	0	0	0	0	0	0	0	0	0	0	0	0	0	0	0	0	0	0	0	0	0	0
A0A669DY32	NACHT domain-containing protein		Oreochromis niloticus (Nile tilapia) (Tilapia nilotica)				LDTLRVEPAGVR	0.95249	-1.2639	0	0	0	9.41863	0	0	0	9.96505	0	0	0	0	0	0	0	0	0	0	0	0	0	0	0	0	0	9.11398	0	0	0	0	0	0	0	0	0	0	0	0	0	0
A0A669DYD8	VPS9 domain containing 1	vps9d1	Oreochromis niloticus (Nile tilapia) (Tilapia nilotica)	vesicle-mediated transport [GO:0016192]		guanyl-nucleotide exchange factor activity [GO:0005085]	AVKEHLK	1	-4.3854	0	0	0	11.8213	11.688	0	0	0	0	0	0	0	0	0	0	0	0	0	0	0	0	0	0	0	0	0	0	0	0	0	0	0	0	0	0	0	0	0	0	9.99138
A0A669DYE4	Uncharacterized protein		Oreochromis niloticus (Nile tilapia) (Tilapia nilotica)				KNQGLPAK	0.94439	-1.2135	0	0	0	0	0	0	0	0	0	0	0	0	0	0	0	0	0	0	0	0	0	0	0	0	0	0	0	0	0	0	0	0	0	0	0	0	0	0	0	0
A0A669DYN6	Calcium channel, voltage-dependent, T type, alpha 1H subunit a		Oreochromis niloticus (Nile tilapia) (Tilapia nilotica)		voltage-gated calcium channel complex [GO:0005891]	voltage-gated calcium channel activity [GO:0005245]	SEVESGADVR	0.95288	-1.4087	0	0	0	0	0	0	0	0	0	0	0	0	0	0	0	0	0	0	0	0	0	0	0	0	0	0	0	0	0	0	0	0	0	0	0	0	0	0	0	0
A0A669DYR3	Myosin heavy chain, fast skeletal muscle	LOC100702068	Oreochromis niloticus (Nile tilapia) (Tilapia nilotica)	system development [GO:0048731]	myosin complex [GO:0016459]	actin filament binding [GO:0051015]; ATP binding [GO:0005524]; cytoskeletal motor activity [GO:0003774]	AKGNLEKMCR	0.99925	-4.3504	0	0	0	0	0	8.46328	10.1239	10.0795	0	0	0	0	0	0	0	0	0	0	0	0	0	0	0	0	0	0	0	0	0	0	0	0	0	0	0	0	0	0	0	0
A0A669DYV9	MTSS1-like protein	LOC100690117	Oreochromis niloticus (Nile tilapia) (Tilapia nilotica)	plasma membrane organization [GO:0007009]		actin binding [GO:0003779]	ALGGTSGSDENVFK	0.99819	-2.4938	0	0	0	0	0	0	0	0	0	0	0	0	0	0	9.46551	0	0	10.203	0	0	0	0	0	0	0	0	0	0	0	0	0	0	0	0	0	0	0	0	0	0
A0A669DZ28	NACHT domain-containing protein		Oreochromis niloticus (Nile tilapia) (Tilapia nilotica)				SDQLTFCFLK	0.95211	-1.3375	0	0	0	0	0	0	0	0	0	0	0	0	0	0	0	0	0	0	0	0	0	0	0	0	0	0	0	0	0	0	0	0	0	0	0	0	0	0	0	0
A0A669DZ57	Chromodomain-helicase-DNA-binding protein Mi-2 homolog	LOC100700920	Oreochromis niloticus (Nile tilapia) (Tilapia nilotica)		membrane [GO:0016020]	zinc ion binding [GO:0008270]	VYLQLWRR	0.98524	-1.7356	0	0	0	0	0	0	0	0	0	0	0	0	0	0	0	0	0	0	0	0	0	0	0	0	0	0	0	0	0	0	0	0	0	0	0	0	0	0	0	0
A0A669DZB1	Activator of basal transcription 1	abt1	Oreochromis niloticus (Nile tilapia) (Tilapia nilotica)		nucleolus [GO:0005730]	nucleic acid binding [GO:0003676]	RRYEGNK	0.93441	-0.98403	0	0	0	0	0	0	0	0	0	0	0	0	0	0	0	0	0	0	0	0	0	0	0	0	0	0	0	0	0	0	0	0	0	0	0	0	0	0	0	0
A0A669DZI3	Histone H3		Oreochromis niloticus (Nile tilapia) (Tilapia nilotica)		nucleosome [GO:0000786]; nucleus [GO:0005634]	DNA binding [GO:0003677]; protein heterodimerization activity [GO:0046982]; structural constituent of chromatin [GO:0030527]	EIAQDFK	0	14.05	0	0	0	0	0	0	10.7988	10.7707	10.7759	0	0	0	0	0	0	0	0	0	0	0	0	0	0	0	0	0	0	0	0	0	0	0	0	0	0	0	0	0	0	0
A0A669DZN4	DIS3 exosome endoribonuclease and 3'-5' exoribonuclease		Oreochromis niloticus (Nile tilapia) (Tilapia nilotica)		exosome (RNase complex) [GO:0000178]	ribonuclease activity [GO:0004540]; RNA binding [GO:0003723]	AAAEAAR	0.12195	-0.33417	0	0	0	0	0	0	0	0	0	9.79326	0	0	0	0	0	0	0	0	0	0	0	0	0	0	0	0	0	0	0	0	0	0	0	0	0	0	0	0	0	0
A0A669DZQ3	WWC family member 3	wwc3	Oreochromis niloticus (Nile tilapia) (Tilapia nilotica)				DYDGRVFFIDHNTR	0.99158	-2.1083	0	0	0	0	0	0	0	0	0	0	0	0	0	0	0	0	0	0	0	0	0	0	0	0	0	0	0	0	0	0	0	0	0	0	0	0	0	0	0	0
A0A669DZQ8	Adenosine deaminase RNA specific B1a		Oreochromis niloticus (Nile tilapia) (Tilapia nilotica)	RNA processing [GO:0006396]		adenosine deaminase activity [GO:0004000]; RNA binding [GO:0003723]	CDNSQGFR	0.96302	-1.4812	0	0	0	0	0	0	0	10.4941	0	0	0	0	0	0	0	0	0	0	0	0	0	0	0	0	0	0	0	9.88521	0	0	0	0	0	0	0	0	0	0	0	0
A0A669DZQ9	BCL9 transcription coactivator	bcl9	Oreochromis niloticus (Nile tilapia) (Tilapia nilotica)	canonical Wnt signaling pathway [GO:0060070]	nucleus [GO:0005634]	beta-catenin binding [GO:0008013]; transcription coactivator activity [GO:0003713]	FPGGPGAMFAGPGAR	0.98896	-1.9791	0	0	0	0	0	0	0	0	0	0	0	0	0	0	0	0	0	0	0	0	0	0	0	0	0	0	0	0	0	0	0	0	0	0	0	0	0	0	0	0
A0A669DZR0	protein kinase C (EC 2.7.11.13)		Oreochromis niloticus (Nile tilapia) (Tilapia nilotica)	protein phosphorylation [GO:0006468]; signal transduction [GO:0007165]	cytoplasm [GO:0005737]	ATP binding [GO:0005524]; calcium-dependent protein kinase C activity [GO:0004698]	VDLLRLSLERR	0.91951	-0.66337	0	0	0	10.0257	10.0662	0	0	0	0	0	0	0	0	0	0	0	0	0	0	0	0	0	0	0	0	0	0	0	0	0	0	0	0	9.16131	0	9.23108	0	0	0	0
A0A669DZV2	[heparan sulfate]-glucosamine N-sulfotransferase (EC 2.8.2.8)		Oreochromis niloticus (Nile tilapia) (Tilapia nilotica)	heparan sulfate proteoglycan biosynthetic process [GO:0015012]; heparin biosynthetic process [GO:0030210]	membrane [GO:0016020]	[heparan sulfate]-glucosamine N-sulfotransferase activity [GO:0015016]; deacetylase activity [GO:0019213]	MLGCVTRLR	0.98379	-1.6237	0	0	0	9.94838	0	0	0	0	0	0	0	0	0	0	0	0	0	0	0	0	0	0	0	0	0	0	0	0	0	0	0	0	0	0	0	0	0	0	0	0
A0A669E015	Cms1 ribosomal small subunit homolog	cmss1	Oreochromis niloticus (Nile tilapia) (Tilapia nilotica)				TKTKPEKR	0.93716	-0.94641	0	0	0	12.9257	0	0	0	0	0	0	0	0	0	0	0	0	0	0	0	0	0	0	0	0	0	0	0	0	0	0	0	0	0	0	0	0	0	0	0	0
A0A669E054	Serine/threonine-protein kinase 40 (EC 2.7.11.1)	stk40	Oreochromis niloticus (Nile tilapia) (Tilapia nilotica)	protein phosphorylation [GO:0006468]	cytoplasm [GO:0005737]; nucleus [GO:0005634]	ATP binding [GO:0005524]; protein serine/threonine kinase activity [GO:0004674]	GAGETSGRASKLQCPGISGSNAK	0.92435	-0.62656	9.57327	0	0	0	0	0	0	0	0	0	0	0	0	0	0	0	0	0	0	0	0	0	0	0	0	0	0	0	0	0	0	0	0	0	0	0	0	0	0	0
A0A669E070	Tight junction protein ZO-3	LOC100696688	Oreochromis niloticus (Nile tilapia) (Tilapia nilotica)		membrane [GO:0016020]		VSSPIVVR	0.96159	-1.4773	0	0	0	0	0	0	0	0	0	0	0	0	0	0	0	0	0	0	0	0	0	0	0	0	0	0	0	0	0	0	0	0	0	0	0	0	0	0	0	0
A0A669E0A2	Pumilio RNA binding family member 2	pum2	Oreochromis niloticus (Nile tilapia) (Tilapia nilotica)			lipid transporter activity [GO:0005319]	IVTTVTDNTVLILKNYQKK	0.98378	-1.626	9.50892	0	0	0	0	0	0	0	0	0	0	0	0	0	0	0	0	0	0	0	0	0	0	0	0	0	0	0	0	0	0	0	0	0	0	0	0	0	0	0
A0A669E0A7	Microtubule-associated protein 1Ab		Oreochromis niloticus (Nile tilapia) (Tilapia nilotica)	microtubule cytoskeleton organization [GO:0000226]	microtubule [GO:0005874]	microtubule binding [GO:0008017]	MPESNLKVK	0.99434	-3.3616	0	0	0	0	0	0	0	0	0	0	0	0	0	0	0	0	0	0	0	0	0	0	0	0	0	0	0	0	11.6874	11.2348	0	0	0	0	0	0	0	0	0	0
A0A669E0N2	Ankyrin repeat and sterile alpha motif domain containing 1B		Oreochromis niloticus (Nile tilapia) (Tilapia nilotica)		cytoplasm [GO:0005737]		SVSNAPSMDQK	0.9528	-1.2637	0	0	0	0	0	0	0	0	0	0	0	0	0	0	0	0	0	0	0	0	0	0	0	0	0	0	0	0	0	0	0	0	0	0	0	0	0	0	0	0
A0A669E0R8	Ras-related C3 botulinum toxin substrate 1-like	RAC1	Oreochromis niloticus (Nile tilapia) (Tilapia nilotica)	small GTPase mediated signal transduction [GO:0007264]		GTP binding [GO:0005525]; GTPase activity [GO:0003924]	IALSPPPITKK	0.98914	-1.716	0	0	0	0	0	0	0	0	0	0	0	0	0	0	0	0	0	0	0	0	0	0	0	0	0	0	0	0	0	0	0	0	0	0	0	0	0	0	0	0
A0A669E0U9	Nicotinamide nucleotide adenylyltransferase 1	nmnat1	Oreochromis niloticus (Nile tilapia) (Tilapia nilotica)	biosynthetic process [GO:0009058]		catalytic activity [GO:0003824]	IEENYHK	0.9487	-0.83576	0	0	0	0	0	0	0	0	0	0	0	0	0	0	0	0	0	0	0	0	0	0	0	0	0	0	9.46473	0	0	0	0	0	0	0	0	0	0	0	0	0
A0A669E0V3	SLIT-ROBO Rho GTPase-activating protein 3	SRGAP3	Oreochromis niloticus (Nile tilapia) (Tilapia nilotica)	signal transduction [GO:0007165]			ILGLVFPPSHK	0.95093	-1.4114	0	0	0	0	0	0	0	0	0	0	0	0	0	0	0	0	0	0	0	0	0	0	0	0	0	0	0	0	0	0	9.52028	0	0	0	0	0	9.89721	0	0	0
A0A669E0Z6	MCF.2 cell line derived transforming sequence a		Oreochromis niloticus (Nile tilapia) (Tilapia nilotica)	intracellular signal transduction [GO:0035556]		guanyl-nucleotide exchange factor activity [GO:0005085]	DMESAFDGFFEK	0.99556	-2.9396	0	0	0	0	0	0	0	0	0	0	0	0	0	0	0	0	0	0	0	0	0	0	0	0	0	0	0	0	0	0	0	0	0	0	0	0	0	0	0	0
A0A669E111	RING-type E3 ubiquitin transferase (EC 2.3.2.27)		Oreochromis niloticus (Nile tilapia) (Tilapia nilotica)			metal ion binding [GO:0046872]; ubiquitin protein ligase activity [GO:0061630]	SETGEDDNFGFK	0.95839	-1.4758	0	0	0	0	0	0	0	0	0	0	0	0	0	0	0	0	0	0	0	0	0	0	0	0	0	0	0	0	0	0	0	0	0	0	0	0	0	0	0	0
A0A669E131	Pleckstrin homology domain containing A5	plekha5	Oreochromis niloticus (Nile tilapia) (Tilapia nilotica)				HNDQREQEYYTLQR	0.99696	-2.2223	0	0	0	0	0	0	0	0	0	0	0	0	0	0	0	0	0	0	0	0	0	0	0	0	0	0	0	0	0	0	0	0	0	0	0	0	0	0	0	0
A0A669E157	Tyrosine-protein kinase receptor (EC 2.7.10.1)	LOC100711993	Oreochromis niloticus (Nile tilapia) (Tilapia nilotica)	protein autophosphorylation [GO:0046777]; transmembrane receptor protein tyrosine kinase signaling pathway [GO:0007169]	plasma membrane [GO:0005886]	ATP binding [GO:0005524]; insulin receptor substrate binding [GO:0043560]; phosphatidylinositol 3-kinase binding [GO:0043548]; transmembrane receptor protein tyrosine kinase activity [GO:0004714]	NILFKCWVK	0.9842	-1.6226	0	0	0	0	0	9.51313	0	0	0	0	0	0	0	0	0	0	0	0	0	0	0	0	0	0	0	0	0	0	0	0	0	0	0	0	0	0	0	0	0	0
A0A669E186	Solute carrier family 12 member 4	slc12a4	Oreochromis niloticus (Nile tilapia) (Tilapia nilotica)		membrane [GO:0016020]	potassium:chloride symporter activity [GO:0015379]	QSTNLYNK	0.95494	-1.4613	0	0	0	0	0	0	0	0	0	0	0	0	0	0	0	0	0	0	0	0	0	0	0	0	0	0	0	0	0	0	0	0	0	0	0	0	0	0	0	0
A0A669E189	ribonuclease H (EC 3.1.26.4)		Oreochromis niloticus (Nile tilapia) (Tilapia nilotica)	DNA integration [GO:0015074]		nucleic acid binding [GO:0003676]	DVEDFCRR	0.98505	-1.7356	0	0	0	0	0	0	0	0	0	0	0	9.89188	0	0	0	0	0	0	0	0	0	0	0	0	0	0	0	0	0	0	0	0	0	0	0	0	0	0	0	0
A0A669E1A3	RING-type E3 ubiquitin transferase (EC 2.3.2.27)	ttc3	Oreochromis niloticus (Nile tilapia) (Tilapia nilotica)	protein ubiquitination [GO:0016567]	cytoplasm [GO:0005737]	metal ion binding [GO:0046872]; transferase activity [GO:0016740]	SLEQQIKKMTNNK	0.98818	-2.0349	0	0	0	0	0	0	0	0	0	0	0	0	0	0	0	0	0	0	10.0157	0	0	0	0	0	0	0	0	0	0	0	0	12.0072	0	0	0	0	0	11.6524	0	11.7604
A0A669E1B9	HEAT repeat containing 5A	heatr5a	Oreochromis niloticus (Nile tilapia) (Tilapia nilotica)				CFAMECVCR	0.97199	-1.5493	0	0	0	0	0	0	0	0	0	0	0	8.86728	0	0	0	0	0	0	0	0	0	0	0	0	0	0	0	0	0	0	0	0	0	0	0	0	0	0	0	0
A0A669E1D5	Acyl-CoA thioesterase 13	acot13	Oreochromis niloticus (Nile tilapia) (Tilapia nilotica)			acyl-CoA hydrolase activity [GO:0047617]	VDEEHTNR	0.95309	-1.4235	0	0	9.42375	0	0	0	9.82016	9.59511	9.53183	0	0	0	0	0	0	0	0	0	0	0	0	0	0	0	0	9.12327	8.97131	0	0	0	0	0	0	0	0	0	0	0	0	0
A0A669E1I2	Suppressor of cytokine signaling 7	socs7	Oreochromis niloticus (Nile tilapia) (Tilapia nilotica)	intracellular signal transduction [GO:0035556]; negative regulation of signal transduction [GO:0009968]; protein ubiquitination [GO:0016567]			EFLLNRKR	0.9977	-2.5082	0	0	0	0	0	0	0	0	0	0	0	0	0	0	0	0	0	0	9.01831	0	0	0	0	0	0	0	0	0	0	0	0	0	0	0	0	0	0	0	0	0
A0A669E1J3	Uronyl 2-sulfotransferase	ust	Oreochromis niloticus (Nile tilapia) (Tilapia nilotica)		membrane [GO:0016020]	sulfotransferase activity [GO:0008146]	GEQNHLIR	0.96125	-1.4784	0	0	0	0	0	0	0	0	0	0	0	0	0	0	0	0	0	0	0	0	0	0	0	0	0	0	0	0	0	0	0	0	0	0	0	0	0	0	0	0
A0A669E1K0	KAT8 regulatory NSL complex subunit 2 (NSL complex protein NSL2) (Non-specific lethal 2 homolog)	kansl2	Oreochromis niloticus (Nile tilapia) (Tilapia nilotica)		histone acetyltransferase complex [GO:0000123]; nucleus [GO:0005634]		RLQHLLKEK	0.93257	-1.0076	0	0	0	0	0	0	0	0	0	0	0	0	0	0	0	13.0625	0	0	0	0	0	0	11.633	0	0	0	0	0	0	0	0	0	0	0	0	12.7743	0	0	0	0
A0A669E1L6	Zinc finger protein ZFMSA12A	LOC100699968	Oreochromis niloticus (Nile tilapia) (Tilapia nilotica)				VVHLKIIK	0.98634	-1.595	0	0	12.1272	12.3315	0	12.1747	12.204	0	0	0	0	0	0	0	0	0	0	0	0	0	0	0	11.4218	0	0	0	0	0	0	11.3594	0	0	0	11.3606	0	11.3453	11.6694	0	0	0
A0A669E1Q4	Protein FAM184A	LOC100700510	Oreochromis niloticus (Nile tilapia) (Tilapia nilotica)				DQEKLVQLHK	0.99562	-3.9272	0	0	0	10.4028	0	0	0	0	0	0	0	0	0	0	0	0	0	0	0	0	0	0	0	0	0	0	0	0	0	0	0	0	0	0	0	0	0	0	0	0
A0A669E1T2	C2H2-type domain-containing protein		Oreochromis niloticus (Nile tilapia) (Tilapia nilotica)				FDVKAHAR	0.97929	-1.588	0	0	0	13.6931	0	0	0	0	0	0	0	0	0	0	0	0	0	0	0	0	0	0	0	0	0	0	0	0	0	0	0	0	0	0	0	0	0	0	0	0
A0A669E1Y9	6-phosphofructo-2-kinase/fructose-2,6-biphosphatase 3	pfkfb3	Oreochromis niloticus (Nile tilapia) (Tilapia nilotica)	fructose 2,6-bisphosphate metabolic process [GO:0006003]; fructose metabolic process [GO:0006000]		6-phosphofructo-2-kinase activity [GO:0003873]; ATP binding [GO:0005524]; fructose-2,6-bisphosphate 2-phosphatase activity [GO:0004331]	FGEENDFK	0.96013	-1.4755	0	0	0	0	0	14.017	0	0	0	0	0	0	0	0	0	0	0	0	0	0	0	0	0	0	0	0	0	0	0	0	0	0	0	0	0	0	0	0	0	0
A0A669E217	Acid-sensing (proton-gated) ion channel 1a		Oreochromis niloticus (Nile tilapia) (Tilapia nilotica)		plasma membrane [GO:0005886]	ligand-gated sodium channel activity [GO:0015280]	CLHLIFR	0.9518	-1.4282	0	0	0	0	0	0	8.71603	0	0	0	0	0	0	0	0	0	0	0	0	0	0	0	0	0	0	0	0	0	0	0	0	0	0	0	0	0	0	0	0	0
A0A669E222	Carbohydrate-responsive element-binding protein	LOC102080620	Oreochromis niloticus (Nile tilapia) (Tilapia nilotica)			protein dimerization activity [GO:0046983]	QRFDHMR	0.98324	-1.6243	0	0	0	0	0	0	0	0	0	0	0	0	0	0	0	0	0	0	0	0	0	0	0	0	0	0	0	0	0	0	0	0	0	0	0	0	0	0	0	0
A0A669E228	PAX interacting protein 1	paxip1	Oreochromis niloticus (Nile tilapia) (Tilapia nilotica)				RMVPPHR	0.94282	-1.184	0	0	9.11562	0	0	0	0	0	0	0	0	0	0	0	0	0	0	0	0	0	0	0	0	0	0	0	0	0	0	0	0	0	0	0	0	0	0	0	0	0
A0A669E237	DEAD/H-box helicase 11	ddx11	Oreochromis niloticus (Nile tilapia) (Tilapia nilotica)	nucleobase-containing compound metabolic process [GO:0006139]	nucleus [GO:0005634]	ATP binding [GO:0005524]; DNA binding [GO:0003677]; DNA helicase activity [GO:0003678]; hydrolase activity, acting on acid anhydrides, in phosphorus-containing anhydrides [GO:0016818]	ASALQQMR	0.95794	-1.4714	0	0	0	0	0	0	0	0	0	0	0	0	0	0	0	0	0	0	0	0	0	0	0	0	0	0	0	0	0	0	0	0	0	0	0	0	0	0	0	0
A0A669E292	Serine protease (EC 3.4.21.-)	LOC109195020	Oreochromis niloticus (Nile tilapia) (Tilapia nilotica)	proteolysis [GO:0006508]		serine-type peptidase activity [GO:0008236]	LTRRPFNK	0.97837	-1.5867	0	0	0	0	0	0	0	0	0	0	0	0	0	0	0	0	0	9.3407	0	0	0	0	0	0	0	0	0	0	0	0	0	0	0	0	0	0	0	0	0	0
A0A669E2F4	Ig-like domain-containing protein		Oreochromis niloticus (Nile tilapia) (Tilapia nilotica)		membrane [GO:0016020]		VSKCDEGLYK	0.98347	-1.643	0	0	0	0	0	0	0	0	0	0	0	0	0	0	0	0	0	0	0	0	0	0	0	0	0	0	0	0	0	0	0	0	0	0	8.61121	0	0	0	0	0
A0A669E2L4	Synaptotagmin VIIb		Oreochromis niloticus (Nile tilapia) (Tilapia nilotica)		membrane [GO:0016020]	calcium-dependent phospholipid binding [GO:0005544]	AINDLDR	0.95047	-1.4153	0	0	0	0	0	8.9672	0	0	0	0	0	0	0	0	0	0	0	0	0	0	0	0	0	0	0	0	0	0	0	0	0	0	0	0	0	0	0	0	0	0
A0A669E2Y3	P2X purinoceptor	p2rx7	Oreochromis niloticus (Nile tilapia) (Tilapia nilotica)	response to ATP [GO:0033198]	plasma membrane [GO:0005886]; postsynapse [GO:0098794]	ATP binding [GO:0005524]; extracellularly ATP-gated cation channel activity [GO:0004931]; purinergic nucleotide receptor activity [GO:0001614]	INIMMLWNR	0.34951	-0.39714	0	0	0	0	0	0	0	0	0	0	0	0	0	0	0	0	0	0	0	0	0	0	0	0	0	0	0	0	0	0	0	0	0	0	0	0	0	0	0	0
A0A669E335	Uncharacterized protein		Oreochromis niloticus (Nile tilapia) (Tilapia nilotica)		membrane [GO:0016020]		NGTREEK	0.98454	-1.6243	0	0	0	9.30731	0	0	0	0	0	0	0	0	0	0	0	0	0	0	0	0	0	0	0	0	0	0	0	0	0	0	0	0	0	0	0	0	0	0	0	0
A0A669E341	Multiple EGF like domains 11	megf11	Oreochromis niloticus (Nile tilapia) (Tilapia nilotica)	anatomical structure development [GO:0048856]	membrane [GO:0016020]	scavenger receptor activity [GO:0005044]	HQSSLFSQGSVCAQPCPLGK	0.73913	-0.508	0	0	0	0	0	0	0	0	0	0	0	0	0	0	0	0	0	0	0	0	0	0	0	0	0	0	0	0	0	0	0	0	0	0	0	0	0	0	0	0
A0A669E372	Tudor domain-containing protein 6	LOC102082307	Oreochromis niloticus (Nile tilapia) (Tilapia nilotica)				ADFIPLYK	0.95777	-1.47	0	0	0	0	0	0	0	0	0	0	10.6266	0	0	0	0	0	0	0	0	0	0	0	0	0	10.1393	0	0	0	0	0	0	0	0	0	10.6367	0	0	0	0	0
A0A669E384	Rap guanine nucleotide exchange factor (GEF) 4		Oreochromis niloticus (Nile tilapia) (Tilapia nilotica)	small GTPase mediated signal transduction [GO:0007264]		guanyl-nucleotide exchange factor activity [GO:0005085]	TTVNLDLFLRR	0.98445	-1.6402	0	0	0	0	9.33011	0	0	0	0	0	0	0	0	0	0	0	0	0	0	0	0	0	0	0	0	0	0	0	0	0	0	0	0	0	0	0	0	0	0	0
A0A669E3G2	Coiled-coil and C2 domain containing 1A	cc2d1a	Oreochromis niloticus (Nile tilapia) (Tilapia nilotica)		membrane [GO:0016020]	DNA-binding transcription repressor activity, RNA polymerase II-specific [GO:0001227]	EILEVMDGR	0.99434	-3.3715	0	0	0	0	0	0	0	0	0	0	0	0	0	0	0	0	0	0	0	0	0	0	0	0	0	0	0	0	0	0	0	0	0	0	0	0	0	0	0	0
A0A669E3P0	ribonuclease H (EC 3.1.26.4)		Oreochromis niloticus (Nile tilapia) (Tilapia nilotica)	DNA integration [GO:0015074]		nucleic acid binding [GO:0003676]	LLNQKTVPDR	0.99699	-2.2996	0	0	0	0	0	0	0	10.7057	0	0	0	0	0	0	0	0	0	0	0	0	0	0	0	0	0	0	0	0	0	0	0	0	0	0	0	0	0	0	0	0
A0A669E3T8	Diacylglycerol kinase (DAG kinase) (EC 2.7.1.107)		Oreochromis niloticus (Nile tilapia) (Tilapia nilotica)	cell development [GO:0048468]; glycerolipid metabolic process [GO:0046486]; phosphorylation [GO:0016310]; protein kinase C-activating G protein-coupled receptor signaling pathway [GO:0007205]		ATP binding [GO:0005524]; diacylglycerol kinase activity [GO:0004143]; metal ion binding [GO:0046872]	RCAVRSTNNCK	0.98658	-1.5996	0	0	0	0	0	0	0	0	0	0	0	0	0	0	0	0	0	0	0	0	0	0	0	0	0	0	0	0	0	0	0	0	0	0	0	0	0	0	0	0
A0A669E3W3	Ribosomal RNA-processing protein 40	exosc3	Oreochromis niloticus (Nile tilapia) (Tilapia nilotica)	regulation of gene expression [GO:0010468]; rRNA processing [GO:0006364]	cytoplasm [GO:0005737]; nuclear exosome (RNase complex) [GO:0000176]	RNA binding [GO:0003723]	ISLTAPVK	0.95802	-1.4708	0	0	0	0	0	0	8.09244	0	0	0	0	0	0	0	0	0	0	0	0	0	0	0	0	0	0	0	0	0	0	0	0	0	0	0	0	0	0	0	0	0
A0A669E3X1	Dual specificity mitogen-activated protein kinase kinase 6	LOC100697345	Oreochromis niloticus (Nile tilapia) (Tilapia nilotica)	protein phosphorylation [GO:0006468]	cytoplasm [GO:0005737]	ATP binding [GO:0005524]; protein kinase activity [GO:0004672]	ADDLEQISELGR	0.95611	-1.3944	0	0	0	9.90366	9.57389	0	0	9.0271	0	0	0	0	0	0	0	0	0	0	0	0	0	0	0	0	0	0	0	0	0	0	0	0	0	0	0	0	0	0	0	0
A0A669E422	Nitrilase family, member 2		Oreochromis niloticus (Nile tilapia) (Tilapia nilotica)	nitrogen compound metabolic process [GO:0006807]		hydrolase activity, acting on carbon-nitrogen (but not peptide) bonds, in linear amides [GO:0016811]	TRRIQGF	0.93099	-0.98403	0	0	0	0	0	0	0	0	0	0	0	0	0	0	0	0	0	0	0	0	0	0	0	0	0	0	0	0	0	0	0	0	0	0	0	0	0	0	0	0
A0A669E473	Cullin-associated and neddylation-dissociated 1		Oreochromis niloticus (Nile tilapia) (Tilapia nilotica)	SCF complex assembly [GO:0010265]			SSVVTAVK	0.98666	-1.7488	0	0	0	0	0	0	0	0	0	0	0	0	0	0	0	0	0	0	0	0	0	0	0	0	0	0	0	0	0	0	0	0	0	0	0	0	0	0	0	0
A0A669E4J2	Uncharacterized protein		Oreochromis niloticus (Nile tilapia) (Tilapia nilotica)				LEMPTADSSLPK	0.93	-1.0725	0	0	0	0	0	0	8.28804	7.91145	8.07521	0	0	0	0	0	0	0	0	0	0	0	0	0	0	0	0	0	0	0	0	0	0	0	0	0	0	0	0	0	0	0
A0A669E4J5	ribonuclease H (EC 3.1.26.4)		Oreochromis niloticus (Nile tilapia) (Tilapia nilotica)	DNA integration [GO:0015074]; proteolysis [GO:0006508]		aspartic-type endopeptidase activity [GO:0004190]; nucleic acid binding [GO:0003676]; RNA-directed DNA polymerase activity [GO:0003964]	GWKLWQR	0.99955	-4.4685	0	0	0	0	0	0	8.59488	0	0	0	9.36608	9.24091	0	0	0	0	0	0	0	0	0	0	0	0	0	0	0	0	0	0	0	0	0	0	0	0	0	0	0	0
A0A669E4Q3	Heat shock protein family A (Hsp70) member 4	hspa4	Oreochromis niloticus (Nile tilapia) (Tilapia nilotica)			ATP binding [GO:0005524]; ATP-dependent protein folding chaperone [GO:0140662]	NTVQGFKK	0.9435	-1.2139	0	0	0	0	0	0	0	0	0	0	0	0	0	0	0	0	0	0	0	0	0	0	0	0	0	0	0	0	0	0	0	0	0	0	0	0	0	0	0	0
A0A669E4S3	Uncharacterized LOC102075892	LOC102075892	Oreochromis niloticus (Nile tilapia) (Tilapia nilotica)	proteolysis [GO:0006508]		cysteine-type peptidase activity [GO:0008234]	DLKLGTQEK	0.99716	-2.3061	0	0	0	11.6799	0	0	0	0	0	0	0	0	0	0	0	0	0	0	0	0	0	0	0	0	0	0	0	0	0	0	0	0	0	0	0	0	0	0	0	0
A0A669E4U0	SRSF protein kinase 3	LOC100702848	Oreochromis niloticus (Nile tilapia) (Tilapia nilotica)	protein phosphorylation [GO:0006468]	cytoplasm [GO:0005737]	ATP binding [GO:0005524]; protein serine/threonine kinase activity [GO:0004674]	KTPQHVQK	0.98486	-1.7356	0	0	0	0	0	0	0	0	0	0	0	0	0	0	0	0	0	0	0	0	0	0	0	0	0	0	0	0	0	0	0	0	0	0	0	0	0	0	0	0
A0A669E4X7	Uncharacterized LOC100712247	LOC100712247	Oreochromis niloticus (Nile tilapia) (Tilapia nilotica)				EDVDRDSSWNQWLR	0.99654	-4.0781	0	0	0	9.58096	0	0	0	0	0	0	0	0	0	0	0	0	0	0	0	0	0	0	0	0	0	0	0	0	9.00753	0	0	0	0	0	0	0	0	0	8.65403	0
A0A669E4Y2	non-specific serine/threonine protein kinase (EC 2.7.11.1)	rock2	Oreochromis niloticus (Nile tilapia) (Tilapia nilotica)	cell development [GO:0048468]; positive regulation of centrosome duplication [GO:0010825]; protein phosphorylation [GO:0006468]; regulation of actin cytoskeleton organization [GO:0032956]; Rho protein signal transduction [GO:0007266]; smooth muscle contraction [GO:0006939]	cytoplasm [GO:0005737]; microtubule organizing center [GO:0005815]	ATP binding [GO:0005524]; metal ion binding [GO:0046872]; protein serine/threonine kinase activity [GO:0004674]; small GTPase binding [GO:0031267]	LTDLEKEK	0.95159	-1.2648	0	0	0	10.1222	10.2298	10.3316	12.2227	0	0	9.10973	0	0	0	0	9.99435	0	0	0	9.37628	9.06337	0	0	0	0	0	0	0	0	0	0	0	0	0	0	9.62385	0	0	0	0	0
A0A669E4Z5	Membrane metalloendopeptidase	MME	Oreochromis niloticus (Nile tilapia) (Tilapia nilotica)	proteolysis [GO:0006508]	membrane [GO:0016020]	metal ion binding [GO:0046872]; metalloendopeptidase activity [GO:0004222]	QAYQVMSLK	0.96167	-1.492	0	0	0	0	0	0	0	0	0	0	0	0	0	0	0	0	0	0	0	0	0	0	0	0	0	0	0	0	0	0	0	0	0	0	0	0	0	0	0	0
A0A669E4Z6	Protein FAM83H	LOC100700171	Oreochromis niloticus (Nile tilapia) (Tilapia nilotica)				ESSEDMASK	0.97449	-1.5341	0	0	0	0	0	0	0	0	0	0	0	0	0	0	0	0	0	0	0	0	0	0	0	0	0	0	0	0	0	0	0	0	0	0	0	0	0	0	0	0
A0A669E540	non-specific serine/threonine protein kinase (EC 2.7.11.1)	LOC100701968	Oreochromis niloticus (Nile tilapia) (Tilapia nilotica)	protein phosphorylation [GO:0006468]; Wnt signaling pathway [GO:0016055]	cytoplasm [GO:0005737]	ATP binding [GO:0005524]; protein serine/threonine kinase activity [GO:0004674]	QHIPYREHK	0.97238	-1.5421	0	0	0	0	0	0	0	0	0	0	0	0	0	0	0	0	0	0	0	0	0	0	0	0	0	0	0	0	0	0	0	0	0	0	0	0	0	0	0	0
A0A669E5A9	1-phosphatidylinositol 4,5-bisphosphate phosphodiesterase gamma (EC 3.1.4.11)	plcg1	Oreochromis niloticus (Nile tilapia) (Tilapia nilotica)	intracellular signal transduction [GO:0035556]; phospholipid catabolic process [GO:0009395]	cellular anatomical entity [GO:0110165]	phosphatidylinositol phospholipase C activity [GO:0004435]	EWVLKIR	0.984	-1.6311	0	0	0	0	0	0	9.35575	0	9.14545	0	0	0	0	0	0	0	0	0	0	0	0	0	0	0	0	0	0	0	0	0	13.5998	0	0	0	0	0	0	0	0	0
A0A669E5G1	Ig-like domain-containing protein		Oreochromis niloticus (Nile tilapia) (Tilapia nilotica)				SDEVTISVSSTEK	0.98405	-1.6403	0	0	0	0	0	0	0	0	0	0	0	0	0	0	0	0	0	0	0	0	0	0	0	0	0	0	0	0	0	0	0	0	0	0	0	0	0	0	0	0
A0A669E5K2	3-oxo-5-alpha-steroid 4-dehydrogenase (EC 1.3.1.22)	srd5a2	Oreochromis niloticus (Nile tilapia) (Tilapia nilotica)	androgen biosynthetic process [GO:0006702]; sex differentiation [GO:0007548]	membrane [GO:0016020]	3-oxo-5-alpha-steroid 4-dehydrogenase activity [GO:0003865]; cholestenone 5-alpha-reductase activity [GO:0047751]	FRKALVPFIF	0.94494	-0.85463	0	0	8.99251	0	0	0	9.66203	0	0	0	0	9.49566	0	0	0	0	0	0	0	0	0	0	0	0	0	0	0	0	0	0	0	0	0	0	0	10.8554	0	0	0	0
A0A669E5K4	Intersectin 2a		Oreochromis niloticus (Nile tilapia) (Tilapia nilotica)	intracellular signal transduction [GO:0035556]	cell projection [GO:0042995]; synapse [GO:0045202]	guanyl-nucleotide exchange factor activity [GO:0005085]	AASEHFIETEKK	0.99599	-2.7652	0	0	0	0	0	0	0	0	0	0	0	0	0	0	0	0	0	0	0	0	0	0	0	0	0	0	0	0	0	0	0	13.52	0	0	0	0	0	0	0	0
A0A669E5N7	Zinc finger RANBP2-type containing 3	zranb3	Oreochromis niloticus (Nile tilapia) (Tilapia nilotica)			ATP binding [GO:0005524]; ATP-dependent chromatin remodeler activity [GO:0140658]; endonuclease activity [GO:0004519]; metal ion binding [GO:0046872]; nucleic acid binding [GO:0003676]	GKNAHIK	0.98263	-1.6243	0	0	0	0	0	0	0	0	0	0	0	0	0	0	0	0	0	0	0	0	0	0	0	0	0	0	0	0	0	0	0	0	0	0	0	0	0	0	0	0
A0A669E5S0	Phosphodiesterase (EC 3.1.4.-)	LOC100697375	Oreochromis niloticus (Nile tilapia) (Tilapia nilotica)	cAMP catabolic process [GO:0006198]; signal transduction [GO:0007165]		3',5'-cyclic-AMP phosphodiesterase activity [GO:0004115]; metal ion binding [GO:0046872]	FGVNTDHEDELAK	0.99374	-3.4141	0	0	0	0	0	0	0	0	0	0	0	0	0	0	0	0	0	0	0	0	0	0	0	0	0	0	0	0	0	0	0	0	0	0	0	0	0	0	0	0
A0A669E5T5	Huluwa		Oreochromis niloticus (Nile tilapia) (Tilapia nilotica)		membrane [GO:0016020]		LLILSKK	0.93616	-0.90728	0	0	0	0	0	10.8006	0	10.4825	0	0	9.93983	0	0	0	0	0	0	9.62375	10.1727	0	0	9.71569	0	0	0	0	10	0	0	0	0	9.86862	0	0	9.85297	0	10.2797	9.92377	9.93385	9.96519
A0A669E5T8	Tau tubulin kinase 2a		Oreochromis niloticus (Nile tilapia) (Tilapia nilotica)	protein phosphorylation [GO:0006468]		ATP binding [GO:0005524]; protein kinase activity [GO:0004672]	DIKPSNFAMGR	0.99349	-3.745	0	0	0	0	0	0	0	0	0	0	0	0	0	0	0	0	0	0	0	0	0	0	0	0	0	0	0	0	0	0	10.7812	10.5629	0	0	0	0	0	0	0	0
A0A669E5V3	Protein asteroid homolog 1-like	LOC100703239	Oreochromis niloticus (Nile tilapia) (Tilapia nilotica)				DEGVNNWQPR	0.9552	-1.3845	0	0	0	0	0	0	0	0	0	0	0	0	0	0	0	0	0	0	0	0	0	0	0	0	0	0	0	0	0	0	0	0	0	0	0	0	0	0	0	0
A0A669E5W5	ATP-binding cassette, sub-family C (CFTR/MRP), member 4		Oreochromis niloticus (Nile tilapia) (Tilapia nilotica)		membrane [GO:0016020]	ABC-type transporter activity [GO:0140359]; ATP binding [GO:0005524]; ATP hydrolysis activity [GO:0016887]	RKEIHQILK	0.93817	-0.99941	0	0	13.1823	0	0	0	0	0	0	0	0	0	0	0	13.1011	0	0	0	0	0	11.3715	0	11.633	0	0	0	0	0	0	12.7543	0	0	12.8414	12.8366	0	0	0	0	12.7915	0
A0A669E5Y8	Protocadherin-related 15b		Oreochromis niloticus (Nile tilapia) (Tilapia nilotica)	homophilic cell adhesion via plasma membrane adhesion molecules [GO:0007156]; inner ear development [GO:0048839]; sensory perception of sound [GO:0007605]	plasma membrane [GO:0005886]; stereocilium [GO:0032420]	calcium ion binding [GO:0005509]	DAGLDSGFDR	0.99739	-2.575	0	0	0	0	0	0	0	0	0	0	0	0	0	0	0	0	0	0	0	0	0	0	0	0	0	0	0	0	0	0	0	0	0	0	0	0	0	0	0	0
A0A669E629	NADH dehydrogenase [ubiquinone] iron-sulfur protein 2, mitochondrial (Complex I-49kD) (NADH-ubiquinone oxidoreductase 49 kDa subunit)	ndufs2	Oreochromis niloticus (Nile tilapia) (Tilapia nilotica)			4 iron, 4 sulfur cluster binding [GO:0051539]; NAD binding [GO:0051287]; oxidoreductase activity, acting on NAD(P)H [GO:0016651]; quinone binding [GO:0048038]	FCKRCPQK	0.95178	-1.347	0	0	0	0	0	0	0	0	0	0	0	0	0	0	0	0	0	0	0	0	0	0	0	0	0	0	0	0	0	0	0	0	0	0	0	0	0	0	0	0
A0A669E641	Myosin-7	LOC100711599	Oreochromis niloticus (Nile tilapia) (Tilapia nilotica)	system development [GO:0048731]	myosin complex [GO:0016459]	actin filament binding [GO:0051015]; ATP binding [GO:0005524]; cytoskeletal motor activity [GO:0003774]	EEQAEADGTEDADK	0.9932	-3.7846	0	0	0	0	0	0	0	0	0	0	0	0	0	0	0	0	0	0	0	0	0	0	0	0	0	0	0	0	0	0	0	0	0	0	0	0	0	0	0	0
A0A669E643	Si:ch1073-459j12.1		Oreochromis niloticus (Nile tilapia) (Tilapia nilotica)	proteolysis [GO:0006508]; regulation of response to external stimulus [GO:0032101]	extracellular region [GO:0005576]	metallocarboxypeptidase activity [GO:0004181]; zinc ion binding [GO:0008270]	LPGHPDLAE	0.95178	-1.3357	0	0	0	0	0	0	0	0	0	0	0	0	0	0	0	0	0	0	0	0	0	0	0	0	0	0	0	0	0	0	0	0	0	0	0	0	0	0	0	0
A0A669E676	Si:dkey-16p21.7		Oreochromis niloticus (Nile tilapia) (Tilapia nilotica)	protein phosphorylation [GO:0006468]	cytoplasm [GO:0005737]	ATP binding [GO:0005524]; protein kinase activity [GO:0004672]	ALDTNAYSQRSR	0.97669	-1.5683	0	0	0	0	0	0	0	0	0	0	0	0	0	0	0	0	0	0	0	0	0	0	0	0	0	0	0	0	0	0	0	0	0	0	0	0	0	0	0	0
A0A669E679	Sorting nexin 13	snx13	Oreochromis niloticus (Nile tilapia) (Tilapia nilotica)		membrane [GO:0016020]		MWLSLRRK	0.93851	-0.95262	0	0	0	0	0	0	0	0	0	0	0	0	0	0	0	0	0	0	0	0	0	0	0	0	0	0	0	0	0	0	0	0	0	0	0	0	10.0892	0	0	0
A0A669E685	Phosphoinositide phospholipase C (EC 3.1.4.11)	PLCB4	Oreochromis niloticus (Nile tilapia) (Tilapia nilotica)	intracellular signal transduction [GO:0035556]; lipid catabolic process [GO:0016042]	cellular anatomical entity [GO:0110165]	calcium ion binding [GO:0005509]; phosphatidylinositol phospholipase C activity [GO:0004435]	ANQAKMSMENSK	0.99486	-2.733	0	0	0	0	0	0	0	0	0	0	0	0	0	0	0	0	0	0	0	0	0	0	0	0	0	0	0	0	0	0	0	0	0	0	0	0	0	0	0	0
A0A669E6J0	FYVE, RhoGEF and PH domain-containing protein 4	LOC100709969	Oreochromis niloticus (Nile tilapia) (Tilapia nilotica)		cytoplasm [GO:0005737]; cytoskeleton [GO:0005856]	guanyl-nucleotide exchange factor activity [GO:0005085]; metal ion binding [GO:0046872]	ERILELQVIREAIDVFQK	0.99139	-2.0919	0	0	0	0	0	0	0	0	9.48125	0	0	0	0	0	0	0	0	0	0	0	0	0	0	0	0	0	0	0	0	0	0	0	0	0	0	0	0	0	0	0
A0A669E6J6	Anthrax toxin receptor 1	LOC100710917	Oreochromis niloticus (Nile tilapia) (Tilapia nilotica)		membrane [GO:0016020]	metal ion binding [GO:0046872]; signaling receptor activity [GO:0038023]	ALCVPSPMLR	0.95165	-1.4314	0	0	0	0	0	0	0	0	0	0	0	0	0	0	0	0	0	0	0	0	0	0	0	0	0	0	0	0	0	0	0	0	0	0	0	0	0	0	9.80982	0
A0A669E6K7	DNA-directed RNA polymerases I and III subunit RPAC1		Oreochromis niloticus (Nile tilapia) (Tilapia nilotica)		DNA-directed RNA polymerase complex [GO:0000428]; nucleus [GO:0005634]	DNA binding [GO:0003677]; protein dimerization activity [GO:0046983]; RNA polymerase I activity [GO:0001054]; RNA polymerase III activity [GO:0001056]	ASKDSSDPR	0.99363	-3.1397	0	0	0	0	0	0	8.85462	0	8.65796	0	0	0	0	0	0	0	0	0	0	0	0	0	0	0	0	0	0	0	0	0	0	0	0	0	0	0	0	0	0	0
A0A669E6S3	NACHT domain-containing protein		Oreochromis niloticus (Nile tilapia) (Tilapia nilotica)				DAFLKLAVNLLRIMK	0.99386	-2.9912	0	0	0	0	0	0	0	0	10.1566	0	0	0	0	0	0	0	0	0	0	0	0	0	0	0	0	0	0	0	0	0	0	0	0	0	0	0	0	0	0	0
A0A669E6W1	RING-type domain-containing protein		Oreochromis niloticus (Nile tilapia) (Tilapia nilotica)			metal ion binding [GO:0046872]	LQTANQSSCCR	0.94754	-1.2944	0	0	0	0	0	0	10.2572	0	0	0	0	0	0	0	0	0	0	0	0	0	0	0	0	0	0	0	0	0	0	0	0	0	0	0	0	0	0	0	0	0
A0A669E704	Large neutral amino acids transporter small subunit 4	LOC100703266	Oreochromis niloticus (Nile tilapia) (Tilapia nilotica)		membrane [GO:0016020]	transmembrane transporter activity [GO:0022857]	DCDDGQEDK	0.9978	-2.2168	0	0	0	0	0	0	0	0	0	0	0	0	0	0	0	0	0	0	0	0	0	0	0	0	0	0	0	0	0	0	0	0	0	0	0	0	0	0	0	0
A0A669E771	Upstream binding transcription factor	ubtf	Oreochromis niloticus (Nile tilapia) (Tilapia nilotica)		nucleus [GO:0005634]	DNA binding [GO:0003677]	EKIMWIKK	0.98829	-1.9985	9.96939	0	0	0	0	0	0	0	0	0	0	0	0	0	0	0	0	0	0	0	0	0	0	0	0	0	0	0	0	0	0	0	0	0	0	0	0	0	0	0
A0A669E787	Actin, alpha cardiac	LOC100534411	Oreochromis niloticus (Nile tilapia) (Tilapia nilotica)				AGFAGDDAPR	0.99722	-2.5385	0	0	0	13.3625	0	0	0	0	0	0	0	0	0	0	0	0	0	0	0	0	0	0	0	0	0	0	0	0	0	0	0	0	0	0	0	0	0	0	0	0
A0A669E788	Ammonium transporter Rh type C 2	LOC100706367	Oreochromis niloticus (Nile tilapia) (Tilapia nilotica)		plasma membrane [GO:0005886]	ammonium transmembrane transporter activity [GO:0008519]	AANFFGPQK	0.95559	-1.3686	0	0	0	0	0	0	0	0	0	0	0	0	0	0	9.74675	0	0	0	0	0	0	0	0	0	0	0	0	0	0	0	0	0	0	0	0	0	0	0	0	0
A0A669E7P0	Twinfilin actin binding protein 2	twf2	Oreochromis niloticus (Nile tilapia) (Tilapia nilotica)	DNA-templated transcription termination [GO:0006353]	nucleus [GO:0005634]		GPFATFK	1.0035	-1.5073	0	0	0	0	0	0	0	0	0	0	0	0	0	0	0	0	0	0	0	0	0	0	0	0	0	0	0	0	0	0	0	0	12.3696	0	0	0	0	0	0	0
A0A669E7S6	Nucleoside diphosphate kinase (EC 2.7.4.6)	nme6	Oreochromis niloticus (Nile tilapia) (Tilapia nilotica)	cell cycle [GO:0007049]; CTP biosynthetic process [GO:0006241]; GTP biosynthetic process [GO:0006183]; nucleoside diphosphate phosphorylation [GO:0006165]; UTP biosynthetic process [GO:0006228]	cytoplasm [GO:0005737]; lamellipodium [GO:0030027]; nucleus [GO:0005634]; ruffle [GO:0001726]	ATP binding [GO:0005524]; nucleoside diphosphate kinase activity [GO:0004550]	LLTSARLSK	0.92821	-1.0716	0	0	9.45018	0	0	0	0	0	0	0	0	0	0	0	0	0	0	0	0	0	0	0	0	0	0	0	0	0	0	0	0	0	0	0	0	0	0	0	0	0
A0A669E7V1	Poly(A) specific ribonuclease subunit PAN2		Oreochromis niloticus (Nile tilapia) (Tilapia nilotica)			exonuclease activity [GO:0004527]	FFFFGHPSGK	0.99738	-2.5546	8.91409	0	0	0	0	0	0	9.24232	9.17602	8.80378	0	0	0	0	0	8.82114	0	0	0	0	0	0	0	0	0	0	0	0	0	0	0	0	0	0	0	0	0	0	0	0
A0A669E817	ribonuclease H (EC 3.1.26.4)		Oreochromis niloticus (Nile tilapia) (Tilapia nilotica)	DNA integration [GO:0015074]; DNA recombination [GO:0006310]; proteolysis [GO:0006508]; viral entry into host cell [GO:0046718]		aspartic-type endopeptidase activity [GO:0004190]; DNA-directed DNA polymerase activity [GO:0003887]; metal ion binding [GO:0046872]; RNA binding [GO:0003723]; RNA-directed DNA polymerase activity [GO:0003964]; RNA-DNA hybrid ribonuclease activity [GO:0004523]	DDDDVYR	0.99696	-2.2181	0	0	0	0	0	0	0	0	0	0	10.996	0	0	0	0	0	0	0	0	0	0	0	0	0	0	0	0	0	0	0	0	0	0	10.5393	0	11.4948	0	0	0	11.8375
A0A669E843	Reverse transcriptase domain-containing protein		Oreochromis niloticus (Nile tilapia) (Tilapia nilotica)				ELTPLLCK	0.95148	-1.4103	0	0	0	0	0	0	0	0	0	0	0	0	0	0	0	0	0	0	0	0	0	0	0	0	0	0	0	0	0	0	0	0	0	0	0	0	0	0	0	0
A0A669E885	Bcl-2-like protein 13	LOC102076526	Oreochromis niloticus (Nile tilapia) (Tilapia nilotica)	apoptotic process [GO:0006915]	membrane [GO:0016020]		IAGRTNTRPR	0.97278	-1.5484	0	0	0	0	9.65388	0	0	0	0	0	0	0	0	0	0	0	0	0	0	0	0	0	0	0	0	0	0	0	0	0	0	0	0	0	0	0	0	0	0	0
A0A669E893	Rho GTPase-activating protein 22	LOC100711995	Oreochromis niloticus (Nile tilapia) (Tilapia nilotica)	signal transduction [GO:0007165]		GTPase activator activity [GO:0005096]	QELKKQR	0.93118	-0.98403	0	0	0	0	9.70926	0	0	0	0	0	0	0	0	0	0	0	0	0	0	0	0	0	0	0	0	0	0	0	0	0	0	0	0	0	0	0	0	0	0	0
A0A669E8D1	Ran GTPase-activating protein 1	LOC100700062	Oreochromis niloticus (Nile tilapia) (Tilapia nilotica)	signal transduction [GO:0007165]		GTPase activator activity [GO:0005096]	DIKQYQGLRALR	0.93814	-0.94732	0	0	0	0	0	0	0	0	0	0	0	0	0	0	0	0	0	0	0	0	0	0	0	0	0	0	0	0	0	0	0	0	0	0	0	0	0	0	0	0
A0A669E8F8	Natriuretic peptide C	nppc	Oreochromis niloticus (Nile tilapia) (Tilapia nilotica)	blood vessel diameter maintenance [GO:0097746]	extracellular region [GO:0005576]	hormone activity [GO:0005179]	AGSSSRSGCFGHK	0.9867	-1.7547	0	0	0	0	0	0	0	0	0	0	0	0	0	0	0	0	0	0	0	0	0	0	0	0	0	0	0	0	0	0	0	0	0	0	0	0	0	0	0	0
A0A669E8I1	Jade family PHD finger 3	jade3	Oreochromis niloticus (Nile tilapia) (Tilapia nilotica)			metal ion binding [GO:0046872]	EVLYAHQK	0.96051	-1.4773	0	0	0	0	0	0	0	0	0	0	0	0	0	0	0	0	0	0	0	0	0	0	0	0	0	0	0	0	0	0	0	0	0	0	0	0	0	0	0	0
A0A669E8K2	phosphopyruvate hydratase (EC 4.2.1.11) (2-phospho-D-glycerate hydro-lyase)	eno1	Oreochromis niloticus (Nile tilapia) (Tilapia nilotica)	glycolytic process [GO:0006096]	phosphopyruvate hydratase complex [GO:0000015]	magnesium ion binding [GO:0000287]; phosphopyruvate hydratase activity [GO:0004634]	ACNCLLLK	0	4.8527	9.30927	9.35056	9.4191	0	13.6441	8.41861	10.6679	10.9215	10.9222	0	0	0	8.82327	8.80025	0	9.50643	9.45162	9.50271	0	0	0	8.87599	0	8.94266	9.35034	9.70274	0	0	0	0	8.7116	8.93802	0	0	0	0	0	0	8.74823	0
A0A669E8M1	F-actin-uncapping protein LRRC16A	LOC100710447	Oreochromis niloticus (Nile tilapia) (Tilapia nilotica)		cytoplasm [GO:0005737]		TLEHHTKFRPKPK	0.99265	-2.141	0	0	0	0	0	0	8.66619	0	0	0	0	0	0	0	0	0	0	0	0	0	0	0	0	0	0	0	0	0	0	0	0	0	0	0	0	0	0	0	0	0
A0A669E8R7	Neogenin 1	neo1	Oreochromis niloticus (Nile tilapia) (Tilapia nilotica)		membrane [GO:0016020]		LELKPMDK	0.94939	-1.2767	0	0	0	9.17595	0	0	0	0	0	0	0	0	0	0	0	0	0	0	0	0	0	0	0	0	0	0	0	0	0	0	0	0	0	0	0	0	0	0	0	0
A0A669E8R8	SWI/SNF related, matrix associated, actin dependent regulator of chromatin, subfamily d, member 3b		Oreochromis niloticus (Nile tilapia) (Tilapia nilotica)	positive regulation of double-strand break repair [GO:2000781]; positive regulation of myoblast differentiation [GO:0045663]; positive regulation of T cell differentiation [GO:0045582]; regulation of G0 to G1 transition [GO:0070316]; regulation of G1/S transition of mitotic cell cycle [GO:2000045]; regulation of mitotic metaphase/anaphase transition [GO:0030071]; regulation of nucleotide-excision…	brahma complex [GO:0035060]		FTSFCSPP	0.99463	-2.9615	0	0	0	0	0	0	0	0	0	0	0	0	0	0	0	0	0	0	0	0	0	0	0	0	0	0	0	0	0	10.0764	0	0	0	0	0	0	0	0	0	0
A0A669E8U2	Peptidyl-prolyl cis-trans isomerase (PPIase) (EC 5.2.1.8)		Oreochromis niloticus (Nile tilapia) (Tilapia nilotica)	protein peptidyl-prolyl isomerization [GO:0000413]		peptidyl-prolyl cis-trans isomerase activity [GO:0003755]	LVDGLLVMR	0.93924	-0.73632	0	0	0	0	0	0	0	0	0	0	9.13049	0	0	0	0	0	0	0	0	0	0	0	0	0	0	0	0	0	0	0	0	0	0	0	0	0	0	0	0	0
A0A669E9J5	Calmodulin-regulated spectrin-associated protein 2	LOC100701512	Oreochromis niloticus (Nile tilapia) (Tilapia nilotica)	neuron projection development [GO:0031175]	cytoplasm [GO:0005737]; microtubule [GO:0005874]	calmodulin binding [GO:0005516]; microtubule binding [GO:0008017]; spectrin binding [GO:0030507]	TAFLNVVRR	0.99518	-2.7393	0	0	0	0	0	0	0	0	0	0	0	0	0	0	0	0	0	0	0	0	0	0	0	0	0	0	0	0	0	0	0	0	0	0	0	0	0	0	0	0
A0A669E9M5	phosphoinositide 5-phosphatase (EC 3.1.3.36)	synj1	Oreochromis niloticus (Nile tilapia) (Tilapia nilotica)	inositol phosphate dephosphorylation [GO:0046855]; phosphatidylinositol dephosphorylation [GO:0046856]		phosphatidylinositol-4,5-bisphosphate 5-phosphatase activity [GO:0004439]	AFSKGYRIYHK	0.99768	-2.405	0	0	0	0	0	0	0	0	0	0	0	0	0	0	0	0	0	0	0	0	0	0	0	0	0	0	0	0	0	0	0	0	0	0	0	0	0	9.05677	0	0
A0A669E9M9	PiggyBac transposable element-derived protein 3	LOC102080225	Oreochromis niloticus (Nile tilapia) (Tilapia nilotica)				LALPIPK	0.21591	-0.33417	17.8007	0	0	0	0	0	0	0	0	17.9034	17.6569	0	0	0	0	0	0	0	17.6142	0	0	17.7072	0	17.639	0	0	17.578	17.9558	0	0	17.7936	17.5621	0	0	0	0	17.8871	17.809	0	0
A0A669E9N0	Transmembrane protein 62	tmem62	Oreochromis niloticus (Nile tilapia) (Tilapia nilotica)		membrane [GO:0016020]	hydrolase activity [GO:0016787]	VEDAAGR	1.0066	-1.5073	0	0	0	0	0	0	0	0	0	0	12.0064	0	0	0	0	0	0	0	0	0	0	0	0	0	0	0	0	0	0	0	0	0	0	0	0	0	0	0	0	0
A0A669E9Q7	Interleukin 17 receptor E	il17re	Oreochromis niloticus (Nile tilapia) (Tilapia nilotica)	inflammatory response [GO:0006954]	membrane [GO:0016020]	interleukin-17 receptor activity [GO:0030368]	DGAKLCDDK	0.99319	-3.7031	0	0	0	0	0	0	0	0	0	0	0	0	0	0	0	0	0	0	0	0	0	0	0	0	0	0	0	0	0	0	0	0	0	0	0	0	0	0	0	0
A0A669E9S5	Integrase catalytic domain-containing protein		Oreochromis niloticus (Nile tilapia) (Tilapia nilotica)	DNA integration [GO:0015074]		nucleic acid binding [GO:0003676]	VLVKLHK	0.99504	-2.7928	0	0	11.4195	0	0	11.3556	11.405	0	0	0	0	0	0	0	0	0	0	0	0	0	0	0	0	0	0	0	0	0	0	0	0	0	0	0	0	0	10.7655	0	0	0
A0A669E9U1	WD repeat domain 75	wdr75	Oreochromis niloticus (Nile tilapia) (Tilapia nilotica)				LWRNFNHKK	0.93637	-0.98236	0	0	0	0	0	0	0	0	0	8.42652	0	0	0	0	0	0	0	0	0	0	0	0	0	0	0	0	0	0	0	0	0	0	0	0	0	0	0	0	0	0
A0A669E9X0	Plac8 onzin related protein 2		Oreochromis niloticus (Nile tilapia) (Tilapia nilotica)				KGRGVDRPVN	0.94628	-0.81032	0	0	0	0	0	0	0	0	0	0	0	0	0	0	0	0	0	0	0	0	0	0	0	0	0	0	0	0	0	0	0	9.84928	0	0	8.84956	0	0	9.68762	0	0
A0A669E9X5	FAT atypical cadherin 3b		Oreochromis niloticus (Nile tilapia) (Tilapia nilotica)	homophilic cell adhesion via plasma membrane adhesion molecules [GO:0007156]	plasma membrane [GO:0005886]	calcium ion binding [GO:0005509]	DNSPQGK	0.9991	-4.2948	0	0	0	0	0	0	0	0	0	0	0	0	0	0	0	0	0	0	0	0	0	0	0	0	0	0	0	0	0	0	0	0	0	0	0	0	0	0	0	0
A0A669E9Z6	Low density lipoprotein receptor-related protein 1Ab		Oreochromis niloticus (Nile tilapia) (Tilapia nilotica)	animal organ development [GO:0048513]; endocytosis [GO:0006897]	membrane [GO:0016020]	calcium ion binding [GO:0005509]	CDGEDDCGDASDEPK	0.99766	-2.3194	0	0	0	0	0	0	0	0	0	0	0	0	0	0	0	0	0	0	9.04136	0	0	0	0	0	0	0	0	0	0	0	0	0	0	0	0	0	0	0	0	0
A0A669EA20	LARGE xylosyl- and glucuronyltransferase 1	LOC100696542	Oreochromis niloticus (Nile tilapia) (Tilapia nilotica)	cellular macromolecule biosynthetic process [GO:0034645]; primary metabolic process [GO:0044238]		UDP-glycosyltransferase activity [GO:0008194]	MLGMCRGR	0.97834	-1.5864	0	0	0	9.50319	9.62097	0	0	0	0	0	0	0	0	0	0	0	0	0	0	0	0	0	0	0	0	0	0	0	0	0	0	0	0	0	0	0	0	0	0	0
A0A669EA31	Calcium-binding mitochondrial carrier protein Aralar1	LOC100700247	Oreochromis niloticus (Nile tilapia) (Tilapia nilotica)		mitochondrial inner membrane [GO:0005743]	calcium ion binding [GO:0005509]	FGLHLPK	0.99138	-2.0844	0	0	0	0	0	0	0	0	0	0	0	0	0	0	0	0	0	0	0	0	0	0	0	0	0	0	0	0	13.153	0	0	0	0	0	0	0	0	0	0	0
A0A669EA87	DNA topoisomerase 2 (EC 5.6.2.2)		Oreochromis niloticus (Nile tilapia) (Tilapia nilotica)	DNA topological change [GO:0006265]	nucleus [GO:0005634]	ATP binding [GO:0005524]; DNA binding [GO:0003677]; DNA topoisomerase type II (double strand cut, ATP-hydrolyzing) activity [GO:0003918]; metal ion binding [GO:0046872]	GDAGKMEGAK	0.91219	-0.67486	0	0	0	0	0	0	0	0	0	0	0	0	0	0	0	0	0	0	0	0	0	0	0	0	0	0	0	0	0	0	0	0	0	0	0	0	0	0	0	0
A0A669EAB0	protein-tyrosine-phosphatase (EC 3.1.3.48)	ptprc	Oreochromis niloticus (Nile tilapia) (Tilapia nilotica)	protein dephosphorylation [GO:0006470]	membrane [GO:0016020]	protein tyrosine phosphatase activity [GO:0004725]	EETINDFWR	0.99309	-3.0043	0	0	0	0	9.9928	0	0	0	0	0	0	0	0	0	0	0	0	0	0	0	0	0	0	0	0	0	0	0	0	0	0	0	0	0	0	0	0	0	9.24586	0
A0A669EAD2	Sodium/potassium-transporting ATPase subunit alpha	LOC100699477	Oreochromis niloticus (Nile tilapia) (Tilapia nilotica)		plasma membrane [GO:0005886]	ATP binding [GO:0005524]; ATP hydrolysis activity [GO:0016887]; metal ion binding [GO:0046872]; P-type potassium transmembrane transporter activity [GO:0008556]	QHDIYDDHKLSFDELHRK	0.93782	-0.73193	0	0	0	0	0	0	0	0	0	0	0	0	0	0	0	0	0	0	0	0	0	0	0	0	0	0	0	0	0	0	0	0	0	0	0	0	0	0	0	0
A0A669EAI4	Enhancer of mRNA-decapping protein 4	edc4	Oreochromis niloticus (Nile tilapia) (Tilapia nilotica)	deadenylation-independent decapping of nuclear-transcribed mRNA [GO:0031087]	P-body [GO:0000932]		KDDSESSQSR	0.95957	-1.5022	0	0	0	0	0	0	0	0	0	0	0	0	0	0	0	0	0	0	0	0	0	0	0	0	0	0	0	0	0	0	0	0	0	0	0	0	0	0	0	0
A0A669EAM8	ADAM metallopeptidase domain 12	ADAM12	Oreochromis niloticus (Nile tilapia) (Tilapia nilotica)	anatomical structure development [GO:0048856]; proteolysis [GO:0006508]	membrane [GO:0016020]	metal ion binding [GO:0046872]; metalloendopeptidase activity [GO:0004222]	SYVLEPCADR	0.96512	-1.5074	0	0	0	10.2914	0	0	0	0	0	0	0	0	0	0	0	0	0	0	0	0	0	0	0	0	0	0	0	0	0	0	0	0	0	0	0	0	0	0	0	0
A0A669EAV9	Phosphatidylinositol 4-phosphate 5-kinase type-1 alpha	LOC100701476	Oreochromis niloticus (Nile tilapia) (Tilapia nilotica)	phosphorylation [GO:0016310]		ATP binding [GO:0005524]; phosphatidylinositol phosphate kinase activity [GO:0016307]	IMDYSLLMGIHNMDQASREK	0.95116	-1.1613	0	0	0	0	0	0	0	0	0	0	0	0	0	0	0	0	0	0	0	0	0	0	0	0	0	0	0	0	0	0	0	0	0	0	0	0	0	0	0	0
A0A669EAW3	Traf2 and NCK-interacting protein kinase	LOC100703189	Oreochromis niloticus (Nile tilapia) (Tilapia nilotica)	protein phosphorylation [GO:0006468]	cytoplasm [GO:0005737]	ATP binding [GO:0005524]; protein kinase activity [GO:0004672]	AVAPNQLLQRK	0.99895	-4.2214	0	0	0	0	0	0	0	0	0	0	0	0	0	0	0	0	0	0	0	0	0	0	0	0	0	0	0	0	0	0	0	0	0	0	0	0	12.5028	0	0	0
A0A669EAY1	Uncharacterized protein		Oreochromis niloticus (Nile tilapia) (Tilapia nilotica)				TEQDHTSAP	0.92891	-1.0716	0	0	0	0	0	0	0	0	0	0	0	0	0	0	0	0	0	0	0	0	0	0	0	0	0	0	0	0	0	0	0	0	0	0	0	0	0	0	0	0
A0A669EB36	Orofacial cleft 1 candidate gene 1 protein		Oreochromis niloticus (Nile tilapia) (Tilapia nilotica)		membrane [GO:0016020]		ESTVKMR	0.98211	-1.5892	0	0	0	0	0	0	0	0	0	0	0	0	0	0	0	0	0	0	0	0	0	0	0	0	0	0	0	0	0	0	0	0	0	0	0	0	0	0	0	0
A0A669EB44	Far upstream element-binding protein 3	LOC100704289	Oreochromis niloticus (Nile tilapia) (Tilapia nilotica)			RNA binding [GO:0003723]	PMCVYCR	0.99304	-1.5073	0	0	0	0	0	0	0	0	0	0	0	0	0	0	0	0	0	0	0	0	0	0	0	0	0	0	0	0	0	0	0	0	0	0	0	0	0	0	0	0
A0A669EB52	Leucine rich repeat containing 7		Oreochromis niloticus (Nile tilapia) (Tilapia nilotica)				LIGRLVPCRCFR	0.98836	-2.0381	0	0	0	9.73479	9.79089	0	0	0	0	0	0	0	0	0	0	0	0	0	0	0	0	0	0	0	0	0	0	0	0	0	0	0	0	0	0	0	0	0	0	0
[truncated: 1,246 more rows]
[truncated: 86 more columns]
