# Supplementary material for: Proteomic and phosphoproteomic profilings reveal distinct cellular responses during Tilapinevirus tilapiae entry and replication
Source: PeerJ. 2025 Feb 21;13:e18923. doi: 10.7717/peerj.18923 (PMC11849505; doi:10.7717/peerj.18923)
Supplement: Supplemental Information 2 [file peerj-13-18923-s002.xlsx]

## Sheet: Sheet1
T: Majority protein IDs	Protein names	Gene Names	Organism	Gene Ontology (biological process)	Gene Ontology (cellular component)	Gene Ontology (molecular function)	N: Q-value	N: Score	T: Peptide sequences	E11_10min-1_1	E11_10min-1_2	E11_10min-1_3	E11_10min-2_1	E11_10min-2_2	E11_10min-2_3	E11_10min-3_1	E11_10min-3_2	E11_10min-3_3	E11_1hr-1_1	E11_1hr-1_2	E11_1hr-1_3	E11_1hr-2_1	E11_1hr-2_2	E11_1hr-2_3	E11_1hr-3_1	E11_1hr-3_2	E11_1hr-3_3	E11_24hr-1_1	E11_24hr-1_2	E11_24hr-1_3	E11_24hr-2_1	E11_24hr-2_2	E11_24hr-2_3	E11_24hr-3_1	E11_24hr-3_2	E11_24hr-3_3	E11_30min-1_1	E11_30min-1_2	E11_30min-1_3	E11_30min-2_1	E11_30min-2_2	E11_30min-2_3	E11_30min-3_1	E11_30min-3_2	E11_30min-3_3	E11_3hr-1_1	E11_3hr-1_2	E11_3hr-1_3	E11_3hr-2_1
A0A669AUV3	Pleckstrin homology-like domain, family B, member 1a		Oreochromis niloticus (Nile tilapia) (Tilapia nilotica)				1.0063	-1.6058	GSTLQKR	0	0	0	0	0	0	0	0	0	0	0	0	0	0	0	0	0	0	0	0	0	3101.9	0	0	0	0	0	0	0	0	0	0	0	0	0	0	0	0	0	0
A0A669AV07	Inositol polyphosphate 5-phosphatase K	LOC100702630	Oreochromis niloticus (Nile tilapia) (Tilapia nilotica)	phosphatidylinositol dephosphorylation [GO:0046856]	cellular anatomical entity [GO:0110165]	inositol-1,3,4,5-tetrakisphosphate 5-phosphatase activity [GO:0052659]; inositol-1,4,5-trisphosphate 5-phosphatase activity [GO:0052658]; inositol-polyphosphate 5-phosphatase activity [GO:0004445]	0.99596	-0.63073	SKTVLRQR	0	0	0	0	0	0	0	0	0	0	0	0	0	0	0	0	0	0	0	0	0	0	0	0	0	0	0	0	0	0	0	0	0	0	0	0	0	0	0	0
A0A669AV64	Family with sequence similarity 50 member A		Oreochromis niloticus (Nile tilapia) (Tilapia nilotica)		nucleus [GO:0005634]		0.99897	-2.4889	EREKQLAK	0	0	0	0	0	0	0	0	0	0	0	0	0	0	0	0	0	0	0	0	0	0	0	0	0	0	0	0	0	0	0	0	0	0	0	0	0	0	0	0
A0A669AV71	Galactosamine (N-acetyl)-6-sulfatase	galns	Oreochromis niloticus (Nile tilapia) (Tilapia nilotica)			sulfuric ester hydrolase activity [GO:0008484]	1.005	-0.1872	SIWCSIFSNIQKR	0	0	0	0	0	0	0	0	1966	0	0	0	0	0	0	0	0	0	0	0	0	0	0	0	0	0	0	0	0	0	0	0	0	0	0	0	0	0	0	0
A0A669AV93	RUNX1 partner transcriptional co-repressor 1	runx1t1	Oreochromis niloticus (Nile tilapia) (Tilapia nilotica)		nucleus [GO:0005634]	transcription corepressor activity [GO:0003714]	0.98584	-0.11515	TPDRTKENGFER	0	0	0	0	0	958.78	0	0	0	0	0	0	0	0	0	0	0	0	0	0	0	0	0	0	0	0	0	0	0	0	0	0	0	0	0	0	0	0	0	0
A0A669AVB7	Cohesin subunit SA (SCC3 homolog) (Stromal antigen)		Oreochromis niloticus (Nile tilapia) (Tilapia nilotica)	cell division [GO:0051301]; chromosome segregation [GO:0007059]; sister chromatid cohesion [GO:0007062]	chromatin [GO:0000785]; chromosome, centromeric region [GO:0000775]; cohesin complex [GO:0008278]; nucleus [GO:0005634]		0.99938	-2.4422	LEKHLDALLR	0	0	0	0	0	0	0	785.84	0	0	0	693.2	0	0	0	0	0	0	1336.1	0	0	0	0	0	0	0	0	0	0	0	0	0	0	0	0	0	718.18	0	0	0
A0A669AVD6	Dystrophin	DMD	Oreochromis niloticus (Nile tilapia) (Tilapia nilotica)		cytoplasm [GO:0005737]; cytoskeleton [GO:0005856]; postsynaptic membrane [GO:0045211]	actin binding [GO:0003779]	0.98076	-0.39719	VPDLDKREEIR	0	0	0	0	0	0	0	0	0	0	0	0	0	0	0	0	0	0	0	0	0	0	0	0	0	0	0	0	0	0	0	0	0	0	0	0	0	0	0	0
A0A669AVR4	AFG3-like protein 1	LOC100702885	Oreochromis niloticus (Nile tilapia) (Tilapia nilotica)	proteolysis [GO:0006508]	membrane [GO:0016020]	ATP binding [GO:0005524]; ATP hydrolysis activity [GO:0016887]; ATP-dependent peptidase activity [GO:0004176]; metalloendopeptidase activity [GO:0004222]	0.96049	-0.014394	GAVLWGPSGNGK	0	0	0	0	0	0	0	0	0	0	0	0	0	0	0	0	0	0	0	0	0	0	0	0	0	0	0	0	0	0	0	0	0	0	0	0	0	0	0	0
A0A669AVU0	Leucine rich repeat and sterile alpha motif containing 1	lrsam1	Oreochromis niloticus (Nile tilapia) (Tilapia nilotica)				1.0036	-0.97329	ILNVEKNHLK	0	0	0	0	0	0	0	0	764.95	0	0	0	0	0	0	0	0	0	0	0	0	0	0	0	0	0	0	0	0	0	0	0	0	0	0	0	0	0	770.06	0
A0A669AW88	Zinc finger protein 429	LOC100693811	Oreochromis niloticus (Nile tilapia) (Tilapia nilotica)				0.99898	-2.5473	AEPTPPR	0	0	0	0	0	0	0	0	0	0	0	0	0	0	0	0	1519.3	0	0	0	0	0	0	0	0	0	0	0	0	0	0	0	0	0	0	0	0	0	0	0
A0A669AWD7	Zinc finger FYVE domain-containing protein 1	LOC100694251	Oreochromis niloticus (Nile tilapia) (Tilapia nilotica)		intracellular membrane-bounded organelle [GO:0043231]	metal ion binding [GO:0046872]	1.0117	-1.1741	HFTPELR	0	0	0	0	0	0	0	0	0	0	0	0	0	0	0	0	0	0	0	0	0	0	0	0	0	0	0	0	0	0	0	0	0	0	0	0	0	0	0	0
A0A669AX09	5'-nucleotidase, cytosolic II	nt5c2	Oreochromis niloticus (Nile tilapia) (Tilapia nilotica)			hydrolase activity [GO:0016787]; metal ion binding [GO:0046872]	1.0086	-1.3439	SLAMEKIK	0	0	0	0	0	0	0	0	0	0	0	0	0	0	0	0	0	0	0	0	0	0	0	0	0	0	0	0	0	0	0	0	0	0	0	0	1419.2	0	0	0
A0A669AX19	Discs, large homolog 5b (Drosophila), tandem duplicate 1		Oreochromis niloticus (Nile tilapia) (Tilapia nilotica)	regulation of apoptotic process [GO:0042981]			1.0089	-1.3439	YELEKEAR	0	0	0	0	0	0	0	0	0	0	0	0	0	0	0	0	0	1506.1	0	0	0	2055.2	0	0	0	0	0	0	0	0	0	2954.2	0	0	0	0	0	0	0	0
A0A669AX25	DNA ligase (EC 6.5.1.1)	lig3	Oreochromis niloticus (Nile tilapia) (Tilapia nilotica)	DNA biosynthetic process [GO:0071897]; DNA recombination [GO:0006310]; DNA repair [GO:0006281]; DNA replication [GO:0006260]	nucleus [GO:0005634]	ATP binding [GO:0005524]; DNA binding [GO:0003677]; DNA ligase (ATP) activity [GO:0003910]; zinc ion binding [GO:0008270]	1.0002	-2.5061	FTSHVHK	0	0	0	0	0	0	0	0	0	0	0	0	0	0	0	827.06	0	0	0	0	0	0	2069.2	0	0	0	0	0	0	0	0	0	0	0	0	0	0	0	0	0
A0A669AX26	ribonuclease H (EC 3.1.26.4)		Oreochromis niloticus (Nile tilapia) (Tilapia nilotica)	DNA integration [GO:0015074]		nucleic acid binding [GO:0003676]	0.99666	-3.9841	EYVVWGK	562.34	0	0	0	0	0	0	1314.9	0	0	0	0	0	0	0	0	0	997.99	0	457.22	0	0	0	735.92	0	0	0	0	0	1511.5	0	0	0	580.63	629.32	0	0	0	0	0
A0A669AXF8	Myosin IIIB		Oreochromis niloticus (Nile tilapia) (Tilapia nilotica)	protein phosphorylation [GO:0006468]; response to stimulus [GO:0050896]; system development [GO:0048731]; visual perception [GO:0007601]	cytoplasm [GO:0005737]; membrane [GO:0016020]; myosin complex [GO:0016459]	actin binding [GO:0003779]; ATP binding [GO:0005524]; cytoskeletal motor activity [GO:0003774]; protein kinase activity [GO:0004672]	0.47887	0.11326	TGNLATSRAR	0	0	0	0	0	0	0	1366.8	0	0	0	0	0	0	0	0	0	0	0	0	0	0	0	0	0	0	0	0	0	0	0	0	0	0	0	0	0	0	0	0
A0A669AXM9	SWI/SNF related, matrix associated, actin dependent regulator of chromatin subfamily c member 1	SMARCC2	Oreochromis niloticus (Nile tilapia) (Tilapia nilotica)		chromosome [GO:0005694]		1.01	-1.3439	KPVSFRQR	0	0	0	0	0	0	0	0	0	0	0	0	0	0	0	0	0	0	0	0	0	0	0	0	0	0	0	0	0	0	0	0	0	0	0	0	0	0	0	0
A0A669AXQ6	N-acetylglucosamine-1-phosphate transferase subunits alpha and beta	gnptab	Oreochromis niloticus (Nile tilapia) (Tilapia nilotica)		membrane [GO:0016020]	calcium ion binding [GO:0005509]; transferase activity, transferring phosphorus-containing groups [GO:0016772]	1.0032	-0.98862	LQDTFADSLR	0	0	0	0	0	0	0	0	0	0	0	0	0	0	0	0	0	0	0	0	0	0	0	0	0	0	0	1770	0	0	0	1325.6	0	0	0	0	0	0	0	0
A0A669AY42	X-ray repair complementing defective repair in Chinese hamster cells 6		Oreochromis niloticus (Nile tilapia) (Tilapia nilotica)	DNA recombination [GO:0006310]; double-strand break repair via nonhomologous end joining [GO:0006303]; telomere maintenance [GO:0000723]	Ku70:Ku80 complex [GO:0043564]	ATP binding [GO:0005524]; damaged DNA binding [GO:0003684]; DNA helicase activity [GO:0003678]; hydrolase activity [GO:0016787]; telomeric DNA binding [GO:0042162]	1.0013	-2.2042	KPGSIKLYR	0	0	0	0	0	0	0	0	0	0	716.98	0	0	0	0	0	0	0	0	0	0	0	0	0	0	0	0	0	0	0	0	0	0	0	0	0	0	0	0	0
A0A669AY73	Rho GTPase-activating protein 19	LOC100705090	Oreochromis niloticus (Nile tilapia) (Tilapia nilotica)	signal transduction [GO:0007165]			0.99157	-0.33863	TVRKSDK	0	0	0	0	0	0	0	0	0	0	0	0	0	0	0	0	0	0	0	0	0	0	0	0	0	0	0	0	0	0	0	0	0	0	0	0	0	0	0	0
A0A669AYC4	Moesin	LOC100710883	Oreochromis niloticus (Nile tilapia) (Tilapia nilotica)		cytoplasm [GO:0005737]; cytoskeleton [GO:0005856]; plasma membrane [GO:0005886]	actin binding [GO:0003779]	1.0088	-1.1741	FFIYLIK	0	0	0	0	0	0	0	0	0	0	0	0	2932.3	0	0	0	0	0	0	0	0	0	0	0	0	0	0	0	0	0	0	0	0	0	0	0	0	0	0	0
A0A669AYJ9	Ig-like domain-containing protein		Oreochromis niloticus (Nile tilapia) (Tilapia nilotica)				1.0114	-1.1741	NGNISLK	0	0	0	0	0	0	0	0	0	0	0	0	0	0	0	0	0	0	0	0	0	0	0	712.35	0	0	0	0	0	0	0	0	0	0	0	0	0	0	645.3	0
A0A669AYQ1	Uncharacterized protein		Oreochromis niloticus (Nile tilapia) (Tilapia nilotica)	negative regulation of protein kinase activity [GO:0006469]		cAMP-dependent protein kinase inhibitor activity [GO:0004862]	1.0125	-1.1741	SQNSPTK	0	0	0	0	0	0	0	0	0	0	0	0	0	0	0	0	0	0	1586.4	0	0	0	0	0	0	0	0	0	0	0	0	0	0	0	0	0	0	0	0	0
A0A669AYZ6	Uncharacterized LOC102078840	LOC102078840	Oreochromis niloticus (Nile tilapia) (Tilapia nilotica)				0.99663	-1.0518	DVVTKFR	0	0	0	0	0	0	0	0	0	0	0	0	0	0	0	0	0	0	0	0	0	0	0	0	0	2943.8	0	0	0	0	0	0	0	0	0	0	0	0	0	0
A0A669AZ53	E3 ubiquitin-protein ligase ZFP91	LOC102081064	Oreochromis niloticus (Nile tilapia) (Tilapia nilotica)				0.99931	-1.0301	SRPAGSRTR	0	0	0	0	0	0	0	0	0	0	0	0	0	0	0	0	0	0	0	0	0	0	0	0	0	0	0	0	0	0	0	0	0	0	0	0	0	0	0	0
A0A669AZ59	Zinc finger protein 665	LOC109194461	Oreochromis niloticus (Nile tilapia) (Tilapia nilotica)				1.0051	-1.0956	YTLSLIVVNK	0	0	0	0	0	0	0	0	0	0	0	0	0	0	0	0	0	0	0	0	0	0	0	0	0	0	0	0	0	0	0	0	0	0	0	0	0	0	0	0
A0A669AZ65	Potassium voltage-gated channel subfamily KQT member 5	LOC100711684	Oreochromis niloticus (Nile tilapia) (Tilapia nilotica)		plasma membrane [GO:0005886]	calmodulin binding [GO:0005516]; voltage-gated potassium channel activity [GO:0005249]	1.011	-1.1741	TEGYGLK	0	2475.9	0	0	0	0	0	0	3684.7	0	0	0	0	0	0	0	0	0	0	0	0	0	0	0	0	0	0	0	0	0	0	0	0	0	0	0	0	0	0	0
A0A669AZ81	DNA replication licensing factor MCM7 (EC 3.6.4.12)	MCM7	Oreochromis niloticus (Nile tilapia) (Tilapia nilotica)	cell cycle [GO:0007049]; DNA replication initiation [GO:0006270]	chromosome [GO:0005694]; MCM complex [GO:0042555]; nucleus [GO:0005634]	ATP binding [GO:0005524]; DNA binding [GO:0003677]; DNA helicase activity [GO:0003678]; hydrolase activity [GO:0016787]	0.99274	-0.80302	LMRRYISLCK	0	0	0	0	0	0	0	0	0	0	391.68	0	0	0	0	0	0	0	0	0	0	0	0	0	0	0	0	0	0	0	0	0	0	0	0	0	0	0	0	0
A0A669AZA3	non-specific serine/threonine protein kinase (EC 2.7.11.1)	ulk1	Oreochromis niloticus (Nile tilapia) (Tilapia nilotica)	autophagy [GO:0006914]; protein phosphorylation [GO:0006468]	cytoplasm [GO:0005737]	ATP binding [GO:0005524]; protein serine/threonine kinase activity [GO:0004674]	0.98276	-0.53571	RLTALQAGLCI	0	0	0	0	0	0	0	0	0	0	0	0	0	0	0	0	0	0	0	0	0	0	0	0	0	0	0	0	0	0	0	0	0	0	0	0	0	0	0	0
A0A669AZB7	HAT C-terminal dimerisation domain-containing protein		Oreochromis niloticus (Nile tilapia) (Tilapia nilotica)			protein dimerization activity [GO:0046983]	1.0033	-0.97329	NPTNLKVHLK	0	0	0	0	0	0	0	0	0	0	0	0	0	0	0	0	1164.7	0	0	0	0	0	0	0	0	0	0	0	0	0	0	0	0	0	0	0	975.61	0	0	0
A0A669AZC7	Homeodomain interacting protein kinase 2		Oreochromis niloticus (Nile tilapia) (Tilapia nilotica)	protein phosphorylation [GO:0006468]	cytoplasm [GO:0005737]	ATP binding [GO:0005524]; protein kinase activity [GO:0004672]	0.9694	-0.097572	SLLISLAPFK	0	0	0	0	0	0	0	0	0	0	0	0	0	0	0	0	0	0	0	0	0	0	0	0	0	0	0	0	0	0	0	0	0	0	0	0	632.85	579.62	710.54	0
A0A669AZF2	Serine/threonine-protein phosphatase (EC 3.1.3.16)	LOC100706881	Oreochromis niloticus (Nile tilapia) (Tilapia nilotica)	cell division [GO:0051301]; glycogen metabolic process [GO:0005977]		myosin phosphatase activity [GO:0017018]	1.0066	-1.6008	IKYPENFFLLR	0	0	0	0	0	0	0	0	0	0	0	0	0	0	808.42	0	0	0	0	0	0	0	0	784.84	0	538.21	0	0	0	0	1098.1	0	0	0	0	0	0	0	0	0
A0A669AZG4	Uncharacterized protein		Oreochromis niloticus (Nile tilapia) (Tilapia nilotica)				0.98698	-0.11515	FPKNLQLKLDNK	0	708.68	0	0	0	0	0	0	0	0	0	0	0	0	0	0	0	0	0	0	0	0	0	0	0	0	0	0	0	0	0	0	0	0	0	0	0	0	0	0
A0A669AZP7	SLIT-ROBO Rho GTPase-activating protein 3	LOC100709810	Oreochromis niloticus (Nile tilapia) (Tilapia nilotica)	signal transduction [GO:0007165]			1.0113	-1.1741	HTLDTLR	0	0	0	0	0	0	0	0	0	0	0	0	0	0	0	0	0	0	0	0	0	0	0	0	0	0	0	0	0	0	0	0	0	0	0	0	0	0	0	0
A0A669AZU9	Mitogen-activated protein kinase (EC 2.7.11.24)	LOC102082809	Oreochromis niloticus (Nile tilapia) (Tilapia nilotica)	protein phosphorylation [GO:0006468]	cytoplasm [GO:0005737]	ATP binding [GO:0005524]; MAP kinase activity [GO:0004707]	0.99804	-0.28417	QRLQFRPLVRVK	1050	0	1247.7	1490	0	447.6	0	0	591.08	0	0	930.86	0	0	934.81	0	793.92	902.34	3107	0	1094.3	3569.3	0	983.52	0	0	0	2596.2	0	770.79	822.2	736.6	853.84	0	0	0	0	0	0	0
A0A669B026	Corticotropin-releasing factor receptor 2	LOC100692941	Oreochromis niloticus (Nile tilapia) (Tilapia nilotica)	cell surface receptor signaling pathway [GO:0007166]	plasma membrane [GO:0005886]	G protein-coupled receptor activity [GO:0004930]	0.96735	-0.080068	ASTFIFYFILFYYVSPLK	0	0	0	0	0	0	0	0	0	0	0	0	0	0	1800.8	0	0	0	0	0	0	0	0	0	0	0	0	0	0	0	0	0	0	0	0	0	1595.2	0	0	0
A0A669B030	Mitochondrial import inner membrane translocase subunit TIM44	LOC100710737	Oreochromis niloticus (Nile tilapia) (Tilapia nilotica)	protein import into mitochondrial matrix [GO:0030150]	mitochondrial inner membrane [GO:0005743]	protein-folding chaperone binding [GO:0051087]	1.0036	-0.85032	AISQGMESVK	0	0	0	0	0	0	0	0	0	0	0	0	0	0	0	0	0	0	0	0	0	0	0	0	0	0	0	0	0	0	0	0	0	0	0	0	0	0	0	0
A0A669B078	Transposase Tc1-like domain-containing protein		Oreochromis niloticus (Nile tilapia) (Tilapia nilotica)	DNA integration [GO:0015074]; DNA transposition [GO:0006313]		DNA binding [GO:0003677]	0	0.70568	VTISNTLKR	949.56	0	943.72	556.41	0	553.17	0	0	0	0	0	0	0	0	0	0	0	0	0	0	899.57	0	829.56	928.62	0	0	0	1052.5	1108.8	1610.9	0	0	569.44	0	0	0	0	0	0	0
A0A669B0B1	Deleted in malignant brain tumors 1 protein	LOC100699270	Oreochromis niloticus (Nile tilapia) (Tilapia nilotica)		membrane [GO:0016020]	scavenger receptor activity [GO:0005044]	0.98998	-0.32017	VDVHRGDHWSPAFNVNWGR	0	0	0	0	0	0	0	0	0	0	0	0	0	0	0	0	0	0	0	0	0	0	0	0	0	0	0	0	0	0	0	0	0	0	0	0	0	0	0	0
A0A669B0K2	Ubiquitin carboxyl-terminal hydrolase (EC 3.4.19.12)	usp20	Oreochromis niloticus (Nile tilapia) (Tilapia nilotica)	endocytosis [GO:0006897]; protein deubiquitination [GO:0016579]; ubiquitin-dependent protein catabolic process [GO:0006511]	microtubule organizing center [GO:0005815]; perinuclear region of cytoplasm [GO:0048471]	cysteine-type deubiquitinase activity [GO:0004843]; zinc ion binding [GO:0008270]	0.65789	0.11326	VPGSPLR	0	0	0	0	0	0	0	0	0	0	0	0	0	0	0	0	0	0	0	0	0	0	0	992.57	0	0	0	0	0	0	0	0	0	0	0	0	0	0	0	0
A0A669B0P9	WD repeat domain 37	WDR37	Oreochromis niloticus (Nile tilapia) (Tilapia nilotica)				0.99851	-0.9327	ISVSVNQK	1873.6	1627.8	1440.8	882.89	0	0	1776.5	1548.5	0	0	656.29	0	0	0	0	522.05	0	564.16	1028.2	0	1191	0	1122.6	1077.8	0	0	0	0	0	1258.3	787.43	0	0	0	0	0	865.07	0	0	0
A0A669B0U7	ribonuclease H (EC 3.1.26.4)		Oreochromis niloticus (Nile tilapia) (Tilapia nilotica)	DNA integration [GO:0015074]		nucleic acid binding [GO:0003676]	1.0129	-1.1741	DYLTGAK	0	0	0	0	0	0	0	0	0	0	0	0	0	0	0	0	0	0	0	0	0	0	0	0	0	0	0	0	0	0	0	0	0	0	0	0	0	0	0	0
A0A669B184	Golgi SNAP receptor complex member 1	gosr1	Oreochromis niloticus (Nile tilapia) (Tilapia nilotica)	endoplasmic reticulum to Golgi vesicle-mediated transport [GO:0006888]; protein transport [GO:0015031]	cis-Golgi network [GO:0005801]; Golgi membrane [GO:0000139]		0.98153	-0.5058	SGSGVNNR	0	0	0	0	0	0	0	0	0	0	0	0	336.1	0	0	0	0	0	487.99	0	0	0	0	0	0	0	0	0	0	0	0	0	0	0	0	0	576.72	0	491.68	0
A0A669B1B5	Pleckstrin homology-like domain family B member 2	LOC100693428	Oreochromis niloticus (Nile tilapia) (Tilapia nilotica)				0.065574	0.11764	PSSPRLGRR	0	0	0	0	0	0	0	0	0	0	0	0	0	0	0	0	0	0	0	0	0	2516.4	0	0	0	0	0	0	0	0	0	0	0	0	0	0	0	0	0	0
A0A669B1D9	Monocyte to macrophage differentiation associated	mmd	Oreochromis niloticus (Nile tilapia) (Tilapia nilotica)		membrane [GO:0016020]	pore-forming activity [GO:0140911]	0.99796	-1.0518	LGRFMNR	0	0	0	0	0	0	0	0	0	0	0	0	0	0	0	0	0	0	0	0	0	0	0	0	0	0	0	0	0	0	0	0	0	0	0	0	0	0	0	0
A0A669B1G6	Mitogen-activated protein kinase kinase kinase 12 (EC 2.7.11.25)	MAP3K12	Oreochromis niloticus (Nile tilapia) (Tilapia nilotica)	JNK cascade [GO:0007254]; protein autophosphorylation [GO:0046777]	cytoplasm [GO:0005737]	ATP binding [GO:0005524]; MAP kinase kinase kinase activity [GO:0004709]	0.99594	-2.6845	GQVRSGLDR	0	0	0	0	0	0	0	0	0	782.71	0	0	0	0	0	0	0	0	0	0	0	0	0	0	0	0	0	0	0	0	0	0	0	0	0	0	0	0	0	0
A0A669B1J0	ADP-ribosylation factor 4	LOC100691547	Oreochromis niloticus (Nile tilapia) (Tilapia nilotica)			GTP binding [GO:0005525]; GTPase activity [GO:0003924]	1.0018	-1.6738	GVAVLVFANK	0	0	726.08	0	0	0	0	0	0	0	0	0	0	0	0	0	0	0	0	0	0	0	0	0	0	0	0	0	0	0	0	0	0	0	0	0	0	0	0	872.34
A0A669B1K8	Metalloendopeptidase (EC 3.4.24.-)		Oreochromis niloticus (Nile tilapia) (Tilapia nilotica)	proteolysis [GO:0006508]		metalloendopeptidase activity [GO:0004222]; zinc ion binding [GO:0008270]	1.0036	-0.97412	TICKTHTK	0	0	0	0	0	0	0	0	0	0	0	0	0	0	0	0	0	0	0	0	0	0	0	5142.1	0	0	0	0	0	0	0	0	0	0	0	0	0	0	0	0
A0A669B1Q7	Dual specificity protein phosphatase (EC 3.1.3.16) (EC 3.1.3.48)		Oreochromis niloticus (Nile tilapia) (Tilapia nilotica)	protein dephosphorylation [GO:0006470]	membrane [GO:0016020]	myosin phosphatase activity [GO:0017018]; protein tyrosine phosphatase activity [GO:0004725]; protein tyrosine/serine/threonine phosphatase activity [GO:0008138]	1.0121	-1.3439	LLVCKYDV	0	0	0	0	0	0	0	0	0	0	0	0	0	0	0	0	0	0	0	0	0	0	0	0	0	0	0	0	0	0	0	0	0	0	0	0	0	0	0	0
A0A669B1S8	Multidrug resistance-associated protein 1	LOC100691027	Oreochromis niloticus (Nile tilapia) (Tilapia nilotica)		membrane [GO:0016020]	ABC-type transporter activity [GO:0140359]; ATP binding [GO:0005524]; ATP hydrolysis activity [GO:0016887]	0.99001	-0.32188	AKIQLGIASDIVR	0	0	0	0	0	0	0	0	0	0	0	0	0	0	0	0	0	0	0	0	0	0	0	0	0	0	0	0	0	0	0	0	0	0	0	0	0	0	0	0
A0A669B1X4	ribonuclease H (EC 3.1.26.4)		Oreochromis niloticus (Nile tilapia) (Tilapia nilotica)				1.0015	-1.9889	LLRSGRPLR	596.09	800.79	737.75	0	0	0	664.1	0	0	0	0	351.24	0	0	0	0	0	0	0	0	0	0	0	0	0	0	0	0	0	0	604.22	0	605.54	0	0	0	0	0	0	0
A0A669B1Z1	Toll-like receptor 2	TLR2	Oreochromis niloticus (Nile tilapia) (Tilapia nilotica)	inflammatory response [GO:0006954]; innate immune response [GO:0045087]; toll-like receptor signaling pathway [GO:0002224]	membrane [GO:0016020]	transmembrane signaling receptor activity [GO:0004888]	0.99725	-1.038	RASVINSK	0	0	0	0	0	0	0	0	0	0	0	0	0	0	0	0	0	0	0	0	0	0	0	0	0	0	0	0	0	0	0	0	0	0	0	0	0	0	0	0
A0A669B1Z5	Collagen, type XI, alpha 1b		Oreochromis niloticus (Nile tilapia) (Tilapia nilotica)			extracellular matrix structural constituent [GO:0005201]	1.0124	-1.3439	LSDGKWHR	0	0	0	0	0	0	0	0	0	0	0	0	0	0	0	0	0	0	0	0	0	0	0	0	0	0	0	0	0	0	0	0	0	0	0	0	0	0	0	0
A0A669B224	Phosphoglucomutase 2 like 1	pgm2l1	Oreochromis niloticus (Nile tilapia) (Tilapia nilotica)	carbohydrate metabolic process [GO:0005975]		intramolecular transferase activity, phosphotransferases [GO:0016868]; magnesium ion binding [GO:0000287]	1.0114	-1.1741	SDGCGWK	0	0	0	0	0	0	0	0	0	0	0	0	0	0	0	0	0	0	0	0	0	0	0	0	0	0	0	0	0	0	0	0	0	0	0	0	0	0	0	0
A0A669B225	Rho-related GTP-binding protein RhoE (Rho family GTPase 3) (Rnd3)	rnd3	Oreochromis niloticus (Nile tilapia) (Tilapia nilotica)	small GTPase mediated signal transduction [GO:0007264]		GTP binding [GO:0005525]; GTPase activity [GO:0003924]	0.99574	-0.33863	TARASKR	0	0	0	0	0	0	0	0	0	0	0	0	0	0	0	0	0	0	0	0	0	0	0	0	0	0	0	0	0	0	0	0	0	0	1011.9	0	0	0	0	0
A0A669B239	CUGBP Elav-like family member 3	LOC100694969	Oreochromis niloticus (Nile tilapia) (Tilapia nilotica)	mRNA processing [GO:0006397]	cytoplasm [GO:0005737]; nucleus [GO:0005634]	RNA binding [GO:0003723]	1.0025	-0.97329	IYELTVIKDK	0	0	0	0	0	0	0	0	0	0	0	0	0	0	0	0	0	0	0	0	0	0	0	0	0	0	0	0	0	0	0	0	0	0	0	0	0	0	0	0
A0A669B262	Tau tubulin kinase 2a		Oreochromis niloticus (Nile tilapia) (Tilapia nilotica)	protein phosphorylation [GO:0006468]		ATP binding [GO:0005524]; protein kinase activity [GO:0004672]	1.0095	-1.3043	IKDKEHVGK	0	0	0	0	0	0	0	0	0	0	0	0	0	0	0	0	0	0	0	0	0	0	0	0	478.93	0	0	0	0	0	0	0	0	0	0	0	0	0	0	0
A0A669B2E7	N-acetyllactosaminide alpha-1,3-galactosyltransferase-like	A3GALT2	Oreochromis niloticus (Nile tilapia) (Tilapia nilotica)	carbohydrate metabolic process [GO:0005975]	membrane [GO:0016020]	hexosyltransferase activity [GO:0016758]	1.0075	-1.2326	MTGLFPLTMSK	0	0	0	0	0	0	0	0	0	0	0	0	0	0	0	0	0	0	0	0	0	0	0	0	0	0	0	0	0	0	0	0	0	0	0	0	0	0	0	0
A0A669B2H7	Uncharacterized LOC100691426	LOC100691426	Oreochromis niloticus (Nile tilapia) (Tilapia nilotica)	immune response [GO:0006955]	extracellular region [GO:0005576]	cytokine activity [GO:0005125]	1.0029	-1.4662	STEVDTES	0	0	0	0	0	0	0	0	0	0	0	0	0	0	0	0	0	0	0	0	0	0	0	0	0	0	0	0	0	0	0	0	0	0	0	0	0	0	0	0
A0A669B2I0	RING finger protein B	LOC100708373	Oreochromis niloticus (Nile tilapia) (Tilapia nilotica)				1.0031	-1.4662	VAVPPSVR	20859	22782	29141	32917	35680	29236	38923	38301	37297	0	31392	32805	27634	28281	29805	18471	18424	17346	31307	35179	41190	35605	42013	0	28232	23523	0	29769	29537	38944	33625	35077	29799	21165	23583	24827	0	0	36170	21650
A0A669B2L1	Platelet-derived growth factor (PDGF) family profile domain-containing protein		Oreochromis niloticus (Nile tilapia) (Tilapia nilotica)		membrane [GO:0016020]	growth factor activity [GO:0008083]	0.97059	-0.063169	GSLLLEKDTTILAR	0	0	0	0	0	0	0	0	0	0	0	0	0	0	0	0	0	0	0	0	0	0	0	0	0	0	0	0	0	0	0	0	0	0	0	0	0	0	0	0
A0A669B2Q7	NHR domain-containing protein		Oreochromis niloticus (Nile tilapia) (Tilapia nilotica)				1.0124	-1.1741	PWPYSMR	0	0	0	0	370.51	0	0	0	0	0	0	0	0	0	0	0	0	0	0	0	0	0	0	0	0	0	0	0	0	0	0	0	0	0	0	0	0	0	0	0
A0A669B2R8	Immunoglobulin heavy variable 6-1		Oreochromis niloticus (Nile tilapia) (Tilapia nilotica)				1.0021	-1.0301	CDTMRGSNR	0	0	0	0	0	0	0	0	0	0	0	0	0	0	0	0	0	0	0	0	0	24941	0	0	0	0	0	0	0	0	0	0	0	0	0	0	0	0	0	0
A0A669B307	Leucine rich repeat containing 9	LRRC9	Oreochromis niloticus (Nile tilapia) (Tilapia nilotica)				1.0087	-1.2716	KTLSQSPEECIK	0	0	0	0	0	0	0	0	0	0	0	0	0	0	0	0	0	0	0	0	0	0	0	0	0	0	0	0	0	0	0	0	0	0	0	423.17	0	0	0	0
A0A669B375	Hook microtubule-tethering protein 2		Oreochromis niloticus (Nile tilapia) (Tilapia nilotica)	cytoplasmic microtubule organization [GO:0031122]; cytoskeleton-dependent intracellular transport [GO:0030705]	cytoplasm [GO:0005737]	microtubule binding [GO:0008017]	1.0016	-1.0803	NLHDKYDALLK	0	0	0	0	0	0	0	0	0	0	0	0	0	0	0	0	0	0	0	0	0	0	0	0	0	0	0	0	0	0	0	0	0	0	0	0	0	0	0	0
A0A669B3E5	Serum/glucocorticoid regulated kinase 1	SGK1	Oreochromis niloticus (Nile tilapia) (Tilapia nilotica)	protein phosphorylation [GO:0006468]	cytoplasm [GO:0005737]	ATP binding [GO:0005524]; protein serine/threonine kinase activity [GO:0004674]	0.99756	-0.035758	ELFYHLQRERCFLEPR	0	0	0	0	1267	0	0	0	0	0	885.72	0	0	0	0	0	0	0	0	2233.5	0	757.89	0	0	0	0	0	0	0	0	0	2200	1887.4	0	0	0	0	0	0	0
A0A669B3F5	Thrombospondin, type I, domain containing 7Ab		Oreochromis niloticus (Nile tilapia) (Tilapia nilotica)		membrane [GO:0016020]		0.99378	-0.3249	KPKRPQRQR	0	0	0	0	0	0	0	0	0	0	0	0	0	0	0	0	0	0	0	0	0	0	0	0	0	0	546.88	0	0	0	0	0	0	0	680.98	0	0	0	0	0
A0A669B3I8	Contactin-1a	CNTN1	Oreochromis niloticus (Nile tilapia) (Tilapia nilotica)		membrane [GO:0016020]		0.99763	-3.6857	TNHNSNGELLIKNVQLK	0	0	0	0	0	0	0	0	0	0	0	0	0	0	0	0	0	0	0	0	0	2745.8	2787.2	2886	0	0	0	0	0	0	0	0	0	0	0	0	0	0	0	0
A0A669B3P8	Adhesion G protein-coupled receptor B1	adgrb1	Oreochromis niloticus (Nile tilapia) (Tilapia nilotica)	cell surface receptor signaling pathway [GO:0007166]; negative regulation of angiogenesis [GO:0016525]	plasma membrane [GO:0005886]	G protein-coupled receptor activity [GO:0004930]	0.99805	-5.5098	ERAGQMTVPLYNMTLKCAK	0	55435	0	0	0	0	0	0	0	0	510.41	0	0	0	0	0	0	0	0	0	0	0	0	0	0	0	0	0	0	0	0	0	0	0	0	0	0	0	0	0
A0A669B409	Adenylate cyclase type 3 (EC 4.6.1.1)	LOC100704945	Oreochromis niloticus (Nile tilapia) (Tilapia nilotica)	cAMP biosynthetic process [GO:0006171]; intracellular signal transduction [GO:0035556]	plasma membrane [GO:0005886]	adenylate cyclase activity [GO:0004016]; ATP binding [GO:0005524]; metal ion binding [GO:0046872]	1.0115	-1.3439	AISYVREK	0	0	0	0	0	0	0	0	0	0	0	0	0	0	0	0	0	0	0	0	0	0	0	0	0	0	0	0	0	0	0	0	0	809.75	0	0	0	0	0	0
A0A669B412	Reverse transcriptase domain-containing protein		Oreochromis niloticus (Nile tilapia) (Tilapia nilotica)				0.99791	-1.0287	LVLNADRTK	0	0	0	0	0	0	0	0	0	0	0	0	0	0	0	0	0	0	0	0	0	0	0	0	0	0	0	0	0	0	0	0	0	0	0	0	0	0	0	0
A0A669B416	RRN3 homolog, RNA polymerase I transcription factor	rrn3	Oreochromis niloticus (Nile tilapia) (Tilapia nilotica)	transcription initiation at RNA polymerase I promoter [GO:0006361]		RNA polymerase I general transcription initiation factor activity [GO:0001181]	0.99416	-0.3069	RDILELIIGKLLK	0	0	0	0	0	0	0	0	0	0	0	0	0	0	0	0	0	0	0	0	0	0	0	0	0	0	0	0	0	0	0	0	0	0	0	0	0	0	0	0
A0A669B496	Ras homolog, mTORC1 binding	rheb	Oreochromis niloticus (Nile tilapia) (Tilapia nilotica)				1.013	-1.1741	IVFYEGK	0	0	0	0	0	0	0	0	0	0	0	0	0	0	0	0	0	683.52	0	851.13	0	0	0	0	0	0	3574.6	0	0	0	0	0	0	0	0	0	0	0	0	0
A0A669B4K0	CASK interacting protein 2	CASKIN2	Oreochromis niloticus (Nile tilapia) (Tilapia nilotica)				0.98636	-0.76167	LMLAVKR	0	0	0	0	0	0	0	0	0	0	0	0	0	0	0	0	0	0	0	0	0	0	0	0	0	0	0	0	0	0	0	0	0	0	0	0	0	0	0	0
A0A669B4K3	Pogo transposable element derived with ZNF domain b		Oreochromis niloticus (Nile tilapia) (Tilapia nilotica)				0.99868	-1.0538	RLGNQLAK	0	0	0	0	0	0	0	0	0	0	0	0	2738.4	0	0	0	0	0	0	0	0	0	0	0	0	0	0	0	0	0	0	0	0	0	0	0	0	0	0	0
A0A669B4M2	General transcription factor IIH subunit 1	gtf2h1	Oreochromis niloticus (Nile tilapia) (Tilapia nilotica)	DNA-templated transcription [GO:0006351]; nucleotide-excision repair [GO:0006289]	transcription factor TFIIH core complex [GO:0000439]		1.0034	-1.66	LHPFKEKIQR	0	1054.3	0	0	0	0	0	0	0	0	0	0	0	0	0	0	0	0	1414.9	465.41	0	473.45	461.72	0	0	0	0	695.15	731.86	0	868.93	701.12	800.53	0	0	0	0	0	0	0
A0A669B4V5	DCC netrin 1 receptor		Oreochromis niloticus (Nile tilapia) (Tilapia nilotica)		membrane [GO:0016020]		1.0036	-1.4662	VTVAGPLK	0	0	0	0	0	0	0	0	0	0	0	0	0	0	0	0	0	0	0	0	0	0	0	0	0	1004	0	0	0	0	0	0	0	0	0	0	0	0	0	0
A0A669B4V7	Calcium-transporting ATPase (EC 7.2.2.10)		Oreochromis niloticus (Nile tilapia) (Tilapia nilotica)		sarcoplasmic reticulum membrane [GO:0033017]	ATP binding [GO:0005524]; ATP hydrolysis activity [GO:0016887]; P-type calcium transporter activity [GO:0005388]	1.0038	-1.4662	VTLTPAVR	0	0	0	0	0	0	36973	0	0	0	0	0	0	0	0	0	0	0	0	0	0	0	0	0	0	0	0	0	0	0	0	0	0	0	0	0	0	0	0	0
A0A669B4Y1	Chemokine-like receptor 1	LOC102076817	Oreochromis niloticus (Nile tilapia) (Tilapia nilotica)		membrane [GO:0016020]	G protein-coupled receptor activity [GO:0004930]	0.99557	-2.9194	RSSTLAR	0	0	0	0	0	0	0	0	0	0	0	0	0	0	0	0	0	0	0	0	0	0	0	0	0	0	0	0	0	0	0	0	0	0	0	0	1906.5	0	0	0
A0A669B4Z7	ABC-type glutathione-S-conjugate transporter (EC 7.6.2.3)		Oreochromis niloticus (Nile tilapia) (Tilapia nilotica)		plasma membrane [GO:0005886]	ABC-type transporter activity [GO:0140359]; ATP binding [GO:0005524]; ATP hydrolysis activity [GO:0016887]	0.99739	-2.9368	AYQVAQMK	0	0	0	0	0	0	0	0	0	0	1293.9	0	0	0	0	0	0	0	0	0	0	0	0	0	0	0	0	0	0	0	0	0	0	0	0	0	0	0	0	0
A0A669B521	Ubiquitin associated protein 1-like a		Oreochromis niloticus (Nile tilapia) (Tilapia nilotica)	ubiquitin-dependent protein catabolic process via the multivesicular body sorting pathway [GO:0043162]	ESCRT I complex [GO:0000813]	DNA binding [GO:0003677]; ubiquitin binding [GO:0043130]	0.97417	-0.066492	ERALEELMTRMA	0	0	963.92	852.83	0	0	1069.5	0	0	0	0	0	0	0	0	0	0	0	0	0	0	0	0	0	0	0	0	1232.4	0	0	0	0	0	0	0	0	0	0	0	1017.3
A0A669B569	Polymeric immunoglobulin receptor		Oreochromis niloticus (Nile tilapia) (Tilapia nilotica)		membrane [GO:0016020]		0.98492	-0.61735	LSEKKWCR	0	0	0	0	0	0	0	0	0	0	0	0	0	0	0	0	0	0	0	0	0	0	0	0	0	0	0	0	0	0	0	0	0	0	0	0	0	0	0	0
A0A669B5C2	Ig-like domain-containing protein		Oreochromis niloticus (Nile tilapia) (Tilapia nilotica)				0.97293	-0.089096	LFILLLRKK	0	0	0	0	826.93	0	0	0	0	1940.7	433.28	0	413.3	0	485.16	0	434.83	521.21	0	1615.8	0	0	483.01	421.19	0	0	435.9	0	0	0	351.13	0	0	377.76	423.88	395.17	0	1612.1	433.95	0
A0A669B5C6	Scribble planar cell polarity protein		Oreochromis niloticus (Nile tilapia) (Tilapia nilotica)				1.0004	-0.91841	SLAVLEPPQVGR	0	0	0	0	0	0	0	0	0	0	0	0	0	0	0	0	0	0	0	0	0	0	0	0	0	0	0	0	0	0	0	0	0	0	0	0	0	0	0	0
A0A669B5E2	Complement component c3a, duplicate 5		Oreochromis niloticus (Nile tilapia) (Tilapia nilotica)		extracellular space [GO:0005615]	endopeptidase inhibitor activity [GO:0004866]	1.0009	-1.6934	AVAYLEK	0	0	0	0	0	0	0	0	0	0	0	0	0	0	0	0	0	0	0	0	0	0	0	0	0	0	0	0	0	0	0	0	0	0	0	0	0	0	0	0
A0A669B5M9	valine--tRNA ligase (EC 6.1.1.9) (Valyl-tRNA synthetase)	vars2	Oreochromis niloticus (Nile tilapia) (Tilapia nilotica)	valyl-tRNA aminoacylation [GO:0006438]		aminoacyl-tRNA editing activity [GO:0002161]; ATP binding [GO:0005524]; valine-tRNA ligase activity [GO:0004832]	1.001	-1.0301	VKEGNLDPR	0	0	0	0	0	0	0	0	0	0	0	0	0	0	0	0	0	0	0	0	0	0	0	733.68	0	0	0	0	0	0	0	0	0	0	0	0	0	0	0	0
A0A669B5P0	Lysosomal trafficking regulator		Oreochromis niloticus (Nile tilapia) (Tilapia nilotica)				0.97333	-0.14478	IVSAVKKAK	786.31	0	0	504.35	542.86	0	493.65	0	0	756.77	0	0	0	0	0	517.46	0	0	0	0	0	395.12	0	0	528.51	0	472.82	578.06	465.98	0	0	0	0	0	568.62	0	0	504.62	0	0
A0A669B5S2	Spermatid perinuclear RNA-binding protein	strbp	Oreochromis niloticus (Nile tilapia) (Tilapia nilotica)	cell differentiation [GO:0030154]; spermatogenesis [GO:0007283]	cytoplasm [GO:0005737]	DNA binding [GO:0003677]; RNA binding [GO:0003723]	0.99357	-0.31083	ESSVGGLLCGVMR	0	0	0	0	0	0	0	0	0	0	0	0	0	0	0	0	0	0	0	0	0	0	442.96	0	0	0	0	0	0	0	0	0	0	0	0	0	0	0	0	0
A0A669B5W6	Si:dkey-89b17.4		Oreochromis niloticus (Nile tilapia) (Tilapia nilotica)				1.0116	-1.3439	FKCGECGK	0	0	0	0	0	0	0	0	0	0	0	0	0	0	0	0	0	0	0	0	0	0	0	0	0	0	0	0	0	0	0	0	0	0	0	0	0	0	0	0
A0A669B5X8	Myosin light chain kinase, smooth muscle	LOC100694458	Oreochromis niloticus (Nile tilapia) (Tilapia nilotica)	protein phosphorylation [GO:0006468]	cytoplasm [GO:0005737]; membrane [GO:0016020]	ATP binding [GO:0005524]; protein kinase activity [GO:0004672]	0.999	-3.2337	GEEELRQR	0	360.54	0	0	0	0	0	0	0	0	0	0	0	0	0	0	0	0	0	0	0	0	0	0	0	0	0	0	0	0	0	0	0	0	0	0	0	0	0	0
A0A669B651	Matrix metalloproteinase-14	LOC100691693	Oreochromis niloticus (Nile tilapia) (Tilapia nilotica)	proteolysis [GO:0006508]	extracellular matrix [GO:0031012]; membrane [GO:0016020]	metalloendopeptidase activity [GO:0004222]; zinc ion binding [GO:0008270]	0.99318	-0.33511	KYGTPRR	0	0	0	0	0	0	0	0	0	0	0	0	0	0	0	0	0	0	0	0	0	0	0	0	0	0	0	0	0	0	0	0	0	0	0	0	0	0	0	0
A0A669B6I5	Lysyl oxidase homolog (EC 1.4.3.13)		Oreochromis niloticus (Nile tilapia) (Tilapia nilotica)	peptidyl-lysine oxidation [GO:0018057]	extracellular space [GO:0005615]; membrane [GO:0016020]	copper ion binding [GO:0005507]; protein-lysine 6-oxidase activity [GO:0004720]; scavenger receptor activity [GO:0005044]	0.99333	-0.33863	VRQSKVR	0	0	0	0	0	0	0	0	0	0	0	0	0	0	0	0	0	0	0	0	0	0	0	0	0	0	0	0	0	0	0	0	0	0	0	0	0	0	0	0
A0A669B6P7	Timeless circadian regulator	timeless	Oreochromis niloticus (Nile tilapia) (Tilapia nilotica)	rhythmic process [GO:0048511]	nucleus [GO:0005634]		0.99686	-4.0926	LVDNAKELK	0	0	0	0	0	0	3018.5	0	0	0	0	0	0	0	0	0	0	0	0	0	0	0	0	0	0	0	0	0	0	0	0	0	0	0	0	0	0	0	0	0
A0A669B6X3	Phosphatidylinositol 3-kinase catalytic subunit type 3 (EC 2.7.1.137)	pik3c3	Oreochromis niloticus (Nile tilapia) (Tilapia nilotica)	phosphatidylinositol-mediated signaling [GO:0048015]		1-phosphatidylinositol-3-kinase activity [GO:0016303]; ATP binding [GO:0005524]	1.0032	-1.6371	DPKPLPPPMKLSK	0	0	0	0	0	0	0	0	0	0	0	0	0	0	0	1100.5	0	0	0	0	0	0	0	0	0	0	0	0	0	0	0	0	0	0	0	0	0	0	0	0
A0A669B759	Circularly permutated Ras protein 1	LOC100692219	Oreochromis niloticus (Nile tilapia) (Tilapia nilotica)	endoplasmic reticulum to Golgi vesicle-mediated transport [GO:0006888]; intracellular protein transport [GO:0006886]	COPII vesicle coat [GO:0030127]	zinc ion binding [GO:0008270]	0.97778	-0.065396	LEGMQDALYR	0	0	0	0	0	0	0	0	0	0	0	0	0	0	0	0	0	0	0	0	0	2046.7	1938.9	2074	0	0	0	0	0	0	0	0	0	0	0	0	0	0	0	0
A0A669B7B4	Forkhead box protein L1	FOXL3	Oreochromis niloticus (Nile tilapia) (Tilapia nilotica)	system development [GO:0048731]	nucleus [GO:0005634]	DNA-binding transcription factor activity [GO:0003700]; sequence-specific DNA binding [GO:0043565]	0.98242	-0.63073	RNMKIGLR	0	2531.2	0	0	0	0	2808.5	0	0	0	0	2565.5	0	0	0	2269.8	2285.4	0	0	0	0	0	0	0	0	0	0	0	0	0	0	0	0	0	0	0	0	0	2340.5	0
A0A669B7E4	FIIND domain-containing protein		Oreochromis niloticus (Nile tilapia) (Tilapia nilotica)		cytoplasm [GO:0005737]		0.98194	-0.63073	RKLNGDER	0	0	0	0	0	0	0	0	0	782.71	0	0	0	0	0	0	0	0	0	0	0	0	0	0	0	0	0	0	0	0	0	0	0	0	0	0	0	0	0	0
A0A669B7G9	DnaJ heat shock protein family (Hsp40) member C13	DNAJC13	Oreochromis niloticus (Nile tilapia) (Tilapia nilotica)	endosome organization [GO:0007032]; regulation of early endosome to late endosome transport [GO:2000641]			1.0099	-0.26014	LGVKTVKALK	0	0	0	0	0	0	0	0	0	0	0	0	0	0	0	0	0	0	336.73	0	0	0	0	0	0	0	0	0	0	0	0	0	0	0	0	0	0	0	0	0
A0A669B7J5	Reverse transcriptase domain-containing protein		Oreochromis niloticus (Nile tilapia) (Tilapia nilotica)			2-oxoglutarate-dependent dioxygenase activity [GO:0016706]; methyltransferase activity [GO:0008168]	0.96061	-0.014927	YERLQSGLIR	0	0	0	0	0	0	0	0	0	0	0	0	0	0	0	0	0	0	0	0	0	0	0	0	0	0	0	0	0	0	0	0	0	0	0	0	0	0	0	0
A0A669B7R3	Galactose mutarotase (EC 5.1.3.3) (Aldose 1-epimerase)	galm	Oreochromis niloticus (Nile tilapia) (Tilapia nilotica)	galactose metabolic process [GO:0006012]		aldose 1-epimerase activity [GO:0004034]; carbohydrate binding [GO:0030246]	1.0085	-1.1741	GTPFDLR	0	0	0	0	0	0	0	0	0	0	0	0	0	0	0	0	0	0	0	0	0	0	0	0	0	0	0	0	0	0	0	0	0	0	0	0	0	0	0	0
A0A669B812	Immunoglobulin subtype domain-containing protein		Oreochromis niloticus (Nile tilapia) (Tilapia nilotica)		membrane [GO:0016020]		1.0042	-1.0904	ADETMSKHTPK	0	0	0	0	0	0	0	0	0	0	0	0	0	0	0	0	0	0	0	0	0	0	0	0	0	0	0	0	0	0	391.93	0	0	0	0	0	0	0	0	0
A0A669B887	protein-tyrosine-phosphatase (EC 3.1.3.48)	LOC100703436	Oreochromis niloticus (Nile tilapia) (Tilapia nilotica)	protein dephosphorylation [GO:0006470]	intracellular non-membrane-bounded organelle [GO:0043232]; membrane-bounded organelle [GO:0043227]	myosin phosphatase activity [GO:0017018]; protein tyrosine/serine/threonine phosphatase activity [GO:0008138]	1.0022	-1.4311	DHQLYFAILQQKIK	0	0	0	0	0	0	0	0	0	0	332.81	0	0	0	0	0	0	0	0	0	0	0	0	0	0	0	0	0	0	0	0	0	0	0	0	0	0	0	0	0
A0A669B8E8	Reverse transcriptase domain-containing protein		Oreochromis niloticus (Nile tilapia) (Tilapia nilotica)			2-oxoglutarate-dependent dioxygenase activity [GO:0016706]; methyltransferase activity [GO:0008168]	0.98064	-0.39719	KLTDLGISSLICK	0	0	0	0	0	0	0	0	0	0	0	0	0	0	0	0	0	0	0	0	0	0	0	0	0	0	0	0	0	0	0	0	0	0	0	0	0	0	0	0
A0A669B8J3	Angiotensin-converting enzyme (EC 3.4.-.-)	ace2	Oreochromis niloticus (Nile tilapia) (Tilapia nilotica)	proteolysis [GO:0006508]	apical plasma membrane [GO:0016324]; cilium [GO:0005929]; cytoplasm [GO:0005737]; extracellular region [GO:0005576]	carboxypeptidase activity [GO:0004180]; metal ion binding [GO:0046872]; metallopeptidase activity [GO:0008237]; peptidyl-dipeptidase activity [GO:0008241]	1.0111	-0.19821	RMRPLYEDYVDLKNEAAK	0	0	0	27525	27205	0	90925	0	0	0	0	17565	0	0	0	31415	0	33224	0	68601	0	0	0	0	32123	25670	22727	0	0	0	31242	28943	28417	22697	0	0	0	0	0	0
A0A669B8N3	Spectrin alpha, non-erythrocytic 1	sptan1	Oreochromis niloticus (Nile tilapia) (Tilapia nilotica)	actin filament capping [GO:0051693]	cell cortex [GO:0005938]; cytoskeleton [GO:0005856]	calcium ion binding [GO:0005509]; calmodulin binding [GO:0005516]	0.98587	-0.76167	NMAASRR	0	0	0	0	0	0	0	1424.3	0	0	0	0	0	0	0	0	0	0	0	0	0	0	0	0	0	0	0	0	0	0	0	0	0	0	0	0	0	0	0	0
A0A669B8S7	FERM domain-containing protein 5	LOC100701599	Oreochromis niloticus (Nile tilapia) (Tilapia nilotica)		cytoskeleton [GO:0005856]		1.0155	-1.1741	AGMVPSR	0	0	0	0	0	0	0	0	0	2062.8	0	0	0	0	0	0	0	0	0	0	0	0	0	0	0	0	0	0	0	0	0	0	0	0	0	2154.3	0	0	0	0
A0A669B8X8	Signal peptide peptidase like 2A	SPPL2A	Oreochromis niloticus (Nile tilapia) (Tilapia nilotica)		endosome membrane [GO:0010008]; lysosomal membrane [GO:0005765]	aspartic-type endopeptidase activity [GO:0004190]	0.99938	-2.2844	IGCGTLR	0	0	0	0	0	0	0	0	0	0	0	0	0	0	0	0	0	0	0	0	0	1962	0	0	0	0	0	0	0	0	0	0	0	0	0	0	0	0	0	0
A0A669B8Z4	Nuclear factor, erythroid 2	nfe2	Oreochromis niloticus (Nile tilapia) (Tilapia nilotica)	regulation of transcription by RNA polymerase II [GO:0006357]	nucleus [GO:0005634]	DNA-binding transcription factor activity [GO:0003700]; RNA polymerase II cis-regulatory region sequence-specific DNA binding [GO:0000978]	0.98767	-0.68318	KLESIIHLER	0	0	0	0	0	0	0	0	0	0	0	0	0	0	0	0	0	0	670.86	0	0	0	0	0	0	0	0	0	0	0	0	0	0	0	0	0	0	0	0	0
A0A669B952	Nuclear receptor subfamily 2 group C member 1	nr2c1	Oreochromis niloticus (Nile tilapia) (Tilapia nilotica)		nucleus [GO:0005634]	DNA-binding transcription factor activity [GO:0003700]; sequence-specific DNA binding [GO:0043565]; zinc ion binding [GO:0008270]	1.0007	-1.4662	KPVEVTAR	0	0	0	0	0	0	0	0	0	0	0	0	0	0	0	0	0	0	0	0	0	0	0	0	886.07	0	0	0	0	0	0	0	0	0	0	0	0	0	0	0
A0A669B9B2	TNF receptor superfamily member 13B	tnfrsf13b	Oreochromis niloticus (Nile tilapia) (Tilapia nilotica)		plasma membrane [GO:0005886]		0.93431	0.042842	GPAHSRTLR	0	0	0	0	0	0	0	0	0	0	0	0	0	0	0	0	0	0	0	0	0	0	0	0	0	0	0	0	0	0	0	0	0	0	0	0	0	0	0	0
A0A669B9H7	Thioredoxin interacting protein	TXNIP	Oreochromis niloticus (Nile tilapia) (Tilapia nilotica)				1.001	-1.064	FENTCSR	0	0	0	0	0	0	0	0	0	0	0	0	0	0	0	0	0	0	0	0	0	2040.2	2118.8	2022.9	0	0	0	0	0	0	0	0	0	0	0	0	0	0	0	0
A0A669BA14	Lactase-phlorizin hydrolase	LOC100703330	Oreochromis niloticus (Nile tilapia) (Tilapia nilotica)	carbohydrate metabolic process [GO:0005975]		hydrolase activity, hydrolyzing O-glycosyl compounds [GO:0004553]	1.0108	-1.3439	ELKVSHYR	0	0	0	0	0	0	0	0	0	0	0	0	0	0	0	0	0	0	0	0	0	0	0	0	0	0	0	0	0	0	0	0	0	0	0	0	0	0	0	0
A0A669BA37	Nuclear receptor domain-containing protein		Oreochromis niloticus (Nile tilapia) (Tilapia nilotica)		membrane [GO:0016020]; nucleus [GO:0005634]	DNA-binding transcription factor activity [GO:0003700]; sequence-specific DNA binding [GO:0043565]; zinc ion binding [GO:0008270]	0.9871	-0.76167	IWPEDRK	0	959.91	0	0	0	0	0	0	0	0	0	0	0	0	0	0	0	0	0	0	0	0	0	0	0	0	0	0	0	0	0	0	0	0	0	0	0	0	0	0
A0A669BA71	Moesin b		Oreochromis niloticus (Nile tilapia) (Tilapia nilotica)		cytoplasm [GO:0005737]; cytoskeleton [GO:0005856]; plasma membrane [GO:0005886]	actin binding [GO:0003779]	1.0036	-2.0613	EKLLPQRVLEQHK	0	0	0	0	0	0	0	0	0	0	0	0	0	0	0	0	0	0	0	0	0	0	0	0	0	0	0	0	0	0	0	2462.7	0	0	0	0	0	0	0	0
A0A669BA93	Rotatin		Oreochromis niloticus (Nile tilapia) (Tilapia nilotica)	cilium organization [GO:0044782]	centrosome [GO:0005813]; ciliary basal body [GO:0036064]		1.0108	-1.3439	VNVLRCQV	0	0	0	0	0	0	0	0	0	0	806.34	0	0	0	0	0	0	0	0	0	0	0	0	0	0	0	0	0	0	0	0	0	0	0	0	0	0	0	0	0
A0A669BAM8	propionate--CoA ligase (EC 6.2.1.17) (Propionate--CoA ligase)	acss3	Oreochromis niloticus (Nile tilapia) (Tilapia nilotica)	lipid metabolic process [GO:0006629]		acetate-CoA ligase activity [GO:0003987]; propionate-CoA ligase activity [GO:0050218]	1.0152	-1.1741	LSYPLTL	0	0	0	0	0	0	0	0	0	0	0	0	0	0	0	0	0	0	0	0	0	0	0	0	0	0	0	0	0	0	0	0	0	0	0	0	0	0	0	0
A0A669BAN1	ribonuclease H (EC 3.1.26.4)	LOC109203576	Oreochromis niloticus (Nile tilapia) (Tilapia nilotica)	DNA integration [GO:0015074]; proteolysis [GO:0006508]		aspartic-type endopeptidase activity [GO:0004190]; nucleic acid binding [GO:0003676]; RNA-directed DNA polymerase activity [GO:0003964]; zinc ion binding [GO:0008270]	1.0103	-1.307	KPKPAQR	0	0	0	0	0	0	0	0	0	0	0	0	0	0	0	0	0	0	0	0	0	0	0	0	0	0	0	0	0	0	0	0	0	0	0	0	0	0	0	0
A0A669BAR6	Dihydrolipoamide acetyltransferase component of pyruvate dehydrogenase complex (EC 2.3.1.-)	pdhx	Oreochromis niloticus (Nile tilapia) (Tilapia nilotica)	acetyl-CoA biosynthetic process from pyruvate [GO:0006086]	mitochondrial matrix [GO:0005759]; pyruvate dehydrogenase complex [GO:0045254]	acyltransferase activity [GO:0016746]	1.0149	-1.1741	IWISYGK	0	0	0	0	0	0	0	0	0	0	0	0	0	0	0	0	0	0	0	0	0	0	0	0	0	1070.1	0	1580.9	0	0	0	0	0	0	0	0	0	0	0	0
A0A669BAU0	Integrase catalytic domain-containing protein		Oreochromis niloticus (Nile tilapia) (Tilapia nilotica)	DNA integration [GO:0015074]		nucleic acid binding [GO:0003676]	1.0044	-0.10129	RELLAVVCAIRHLK	0	0	0	0	0	0	0	0	0	0	0	0	0	0	0	0	0	0	0	0	0	0	0	0	0	0	0	0	0	0	0	0	0	0	0	0	0	0	0	0
A0A669BBD0	Atypical kinase COQ8B, mitochondrial	LOC100693708	Oreochromis niloticus (Nile tilapia) (Tilapia nilotica)				0.98636	-0.60558	IVSTLCKVRGAALK	0	0	0	0	0	0	0	0	0	0	0	0	0	0	0	0	0	0	0	0	0	0	0	0	0	0	0	0	0	0	0	0	0	0	0	0	0	0	0	0
A0A669BBE9	Phosphodiesterase (EC 3.1.4.-)	PDE7B	Oreochromis niloticus (Nile tilapia) (Tilapia nilotica)	signal transduction [GO:0007165]		3',5'-cyclic-nucleotide phosphodiesterase activity [GO:0004114]; metal ion binding [GO:0046872]	0.98502	-0.17093	NAQFFIPLILKQK	0	0	0	0	0	0	0	0	0	0	0	0	0	0	0	0	707.52	0	0	0	0	0	0	0	0	0	0	0	0	0	0	0	0	0	0	0	0	0	0	0
A0A669BBK9	Nuclear receptor subfamily 2 group F member 6	NR2F6	Oreochromis niloticus (Nile tilapia) (Tilapia nilotica)		nucleus [GO:0005634]	DNA-binding transcription factor activity [GO:0003700]; sequence-specific DNA binding [GO:0043565]; zinc ion binding [GO:0008270]	1.0035	-1.1085	VFQDQVEKLNR	0	0	0	0	0	0	0	0	0	0	0	0	0	0	0	0	0	0	0	0	0	0	0	0	0	0	0	0	359.37	0	0	0	0	0	0	0	0	0	0	0
A0A669BBN1	Kinesin family member 1Ab		Oreochromis niloticus (Nile tilapia) (Tilapia nilotica)	microtubule-based movement [GO:0007018]; system development [GO:0048731]	axon [GO:0030424]; cytoplasm [GO:0005737]; microtubule [GO:0005874]	ATP binding [GO:0005524]; microtubule binding [GO:0008017]; microtubule motor activity [GO:0003777]	0.98773	-0.63073	SIRNLFRR	0	0	0	0	0	0	0	0	0	0	0	0	0	0	0	0	0	0	0	0	0	0	0	0	0	0	0	0	0	0	0	0	0	0	0	0	0	0	0	1224.5
A0A669BBU8	AIG1-type G domain-containing protein		Oreochromis niloticus (Nile tilapia) (Tilapia nilotica)			GTP binding [GO:0005525]	1.0108	-1.3439	VIKENSGK	0	0	0	0	0	0	0	0	0	0	0	0	0	0	0	0	0	0	0	0	0	0	0	0	0	0	0	0	0	0	0	0	0	0	0	0	0	0	0	0
A0A669BBW4	C2H2-type domain-containing protein		Oreochromis niloticus (Nile tilapia) (Tilapia nilotica)				1.0118	-1.1524	SFVEAGHLK	0	0	0	0	0	0	0	0	0	0	0	0	0	0	0	0	0	0	0	0	0	0	0	0	0	0	0	0	0	0	0	0	0	0	0	0	0	0	0	0
A0A669BC08	Epoxide hydrolase 2	ephx2	Oreochromis niloticus (Nile tilapia) (Tilapia nilotica)			catalytic activity [GO:0003824]	0.99932	-1.0518	DLERTFK	0	0	0	0	0	0	0	0	0	0	0	0	0	0	0	0	0	0	0	0	0	0	0	0	0	0	0	0	0	0	0	0	0	0	0	0	905.89	0	0	0
A0A669BC30	C2H2-type domain-containing protein		Oreochromis niloticus (Nile tilapia) (Tilapia nilotica)				1.0017	-1.0301	GFTLKQLLR	0	0	0	0	1881.1	0	0	0	0	0	0	0	0	0	0	0	0	0	0	0	0	0	0	0	0	0	0	0	0	0	0	0	0	0	0	0	0	0	0	0
A0A669BC63	PH domain and leucine rich repeat protein phosphatase 2	PHLPP2	Oreochromis niloticus (Nile tilapia) (Tilapia nilotica)				0.99864	-1.0518	GKTQLHK	0	4070.1	0	0	0	0	0	0	0	0	0	0	0	0	0	0	0	0	0	0	0	0	0	0	0	0	0	0	0	0	0	0	0	0	0	0	0	0	0	0
A0A669BC65	LIM domain kinase 2	limk2	Oreochromis niloticus (Nile tilapia) (Tilapia nilotica)	animal organ development [GO:0048513]; protein phosphorylation [GO:0006468]	intracellular organelle [GO:0043229]	ATP binding [GO:0005524]; metal ion binding [GO:0046872]; protein serine/threonine kinase activity [GO:0004674]	1.001	-1.0301	YCNIRNIGK	0	0	0	0	0	0	0	0	0	0	0	0	0	0	0	0	0	0	0	0	0	0	0	0	0	0	0	0	0	0	0	0	0	0	0	0	0	0	0	0
A0A669BCE3	Replication factor C subunit 1	rfc1	Oreochromis niloticus (Nile tilapia) (Tilapia nilotica)	DNA repair [GO:0006281]; DNA replication [GO:0006260]	DNA replication factor C complex [GO:0005663]; nucleus [GO:0005634]	ATP binding [GO:0005524]; ATP hydrolysis activity [GO:0016887]; DNA binding [GO:0003677]; DNA clamp loader activity [GO:0003689]	1.0041	-1.6236	DGRTPPGR	0	0	0	0	0	0	0	1773.9	0	0	0	0	0	0	0	0	0	0	0	0	0	0	0	0	0	0	0	0	0	0	0	0	0	0	0	0	0	0	0	0
A0A669BCF9	Uncharacterized LOC100690281	LOC100690281	Oreochromis niloticus (Nile tilapia) (Tilapia nilotica)			protein dimerization activity [GO:0046983]	1.0043	-0.87028	RPIVAFRHVSHK	0	0	0	0	0	0	0	0	0	0	0	0	0	0	0	0	0	0	0	0	0	0	0	0	0	0	0	0	0	0	0	0	0	0	0	0	0	0	0	0
A0A669BCH4	Adenosine receptor A1	LOC100698466	Oreochromis niloticus (Nile tilapia) (Tilapia nilotica)		plasma membrane [GO:0005886]	G protein-coupled adenosine receptor activity [GO:0001609]	1.0142	-1.1741	MTVDAYK	0	0	0	0	0	0	0	0	0	0	0	0	0	0	0	0	0	0	0	0	0	0	0	0	0	0	0	0	0	0	0	0	0	0	0	0	0	0	0	0
A0A669BCP0	Anoctamin	LOC100696049	Oreochromis niloticus (Nile tilapia) (Tilapia nilotica)		membrane [GO:0016020]		0.98605	-0.14305	FLKSPEVKK	0	0	0	0	0	0	0	0	0	0	0	0	0	0	0	0	0	0	0	0	0	0	0	0	0	0	0	0	0	0	0	0	0	0	0	0	0	0	0	0
A0A669BCQ3	Peptidase M60 domain-containing protein		Oreochromis niloticus (Nile tilapia) (Tilapia nilotica)				1.0114	-1.1623	GLEHLDK	0	0	0	0	0	0	0	0	0	0	0	0	0	0	0	0	0	0	0	0	0	1235.5	1325.1	1231.9	0	0	0	0	0	0	0	0	0	0	0	0	0	0	0	0
A0A669BCV3	Diamine acetyltransferase 2	LOC100692450	Oreochromis niloticus (Nile tilapia) (Tilapia nilotica)			acyltransferase activity, transferring groups other than amino-acyl groups [GO:0016747]	1.0126	-1.1741	MGYHCLR	0	0	0	0	0	0	0	356.4	0	0	0	0	0	0	0	0	0	0	0	0	0	0	0	0	0	0	0	0	0	0	0	0	0	0	0	0	0	0	0	0
A0A669BCV8	Potassium channel tetramerization domain containing 9	kctd9	Oreochromis niloticus (Nile tilapia) (Tilapia nilotica)	intracellular signal transduction [GO:0035556]; protein homooligomerization [GO:0051260]			1.0023	-1.0546	LFTTTRSTLVSK	0	0	0	0	0	0	0	0	0	0	0	0	0	0	0	0	0	0	0	0	0	0	0	0	0	0	0	0	0	0	0	0	0	0	0	0	0	0	0	0
A0A669BCZ3	Cubilin (intrinsic factor-cobalamin receptor)		Oreochromis niloticus (Nile tilapia) (Tilapia nilotica)			calcium ion binding [GO:0005509]	0.99329	-0.82629	FKSDSSVSR	0	0	0	0	0	0	0	0	0	0	0	0	0	0	0	0	0	0	0	0	0	0	0	0	0	0	0	0	0	0	0	0	0	0	0	0	0	0	0	0
A0A669BD03	Furin-1	LOC100705046	Oreochromis niloticus (Nile tilapia) (Tilapia nilotica)	proteolysis [GO:0006508]	membrane [GO:0016020]	serine-type endopeptidase activity [GO:0004252]	1.0114	-1.1741	LTLSYNR	0	0	0	0	0	0	0	0	0	0	0	0	0	0	0	0	0	0	0	0	0	0	0	0	0	0	0	0	0	0	1683.3	0	0	0	0	0	0	0	0	0
A0A669BD25	Chloride channel, voltage-sensitive 1a		Oreochromis niloticus (Nile tilapia) (Tilapia nilotica)		membrane [GO:0016020]	voltage-gated chloride channel activity [GO:0005247]	1.0133	-1.1741	VLSVFNK	0	0	0	0	0	0	0	0	0	0	0	0	0	0	0	0	0	0	0	0	0	0	0	0	0	0	0	0	0	0	0	0	0	0	0	0	0	0	0	0
A0A669BD53	Neurobeachin like 1	nbeal1	Oreochromis niloticus (Nile tilapia) (Tilapia nilotica)				1.001	-2.3144	ALLAMVR	0	0	0	0	0	0	0	0	0	0	0	0	0	0	0	0	0	0	0	0	0	0	389.85	0	0	0	0	0	0	0	0	0	0	0	0	0	0	0	0	0
A0A669BD54	ribonuclease H (EC 3.1.26.4)		Oreochromis niloticus (Nile tilapia) (Tilapia nilotica)	DNA integration [GO:0015074]		nucleic acid binding [GO:0003676]	0.99865	-1.0518	GQKHWPR	0	0	0	0	0	0	0	0	0	0	0	0	0	642.5	707.15	0	0	0	1138.3	0	0	0	0	0	0	0	0	0	0	0	0	0	944.92	0	0	0	0	0	0	0
A0A669BD88	KIAA1211 like	kiaa1211l	Oreochromis niloticus (Nile tilapia) (Tilapia nilotica)				0.99364	-0.81829	GEWTTPPGPKGVELKK	0	0	0	0	0	0	0	0	0	0	0	0	0	0	0	0	0	0	0	0	0	0	0	0	0	0	0	0	0	0	0	0	0	0	0	0	0	0	0	0
A0A669BDB5	ATP-dependent RNA helicase SUPV3L1, mitochondrial (Suppressor of var1 3-like protein 1)		Oreochromis niloticus (Nile tilapia) (Tilapia nilotica)		mitochondrial nucleoid [GO:0042645]	hydrolase activity, acting on acid anhydrides [GO:0016817]; RNA helicase activity [GO:0003724]	1.0099	-0.26014	KNCKFTQAGK	0	0	0	0	0	0	0	0	0	0	0	0	0	0	0	0	0	0	0	0	0	0	0	0	0	0	0	0	0	0	0	0	0	0	0	0	0	0	0	0
A0A669BDE2	Ankyrin repeat domain 44		Oreochromis niloticus (Nile tilapia) (Tilapia nilotica)				0.98508	-0.63073	KLLSSGRR	0	0	0	0	0	0	0	0	0	0	640.34	0	0	0	0	0	0	0	0	0	0	0	0	0	0	0	0	0	0	0	0	0	0	0	0	0	0	0	0	0
A0A669BDS8	T-cell surface antigen CD2	LOC100707126	Oreochromis niloticus (Nile tilapia) (Tilapia nilotica)		membrane [GO:0016020]		0.99666	-4.1077	QIICSYSEKHTK	0	0	0	0	0	0	0	0	0	0	0	0	0	0	0	0	0	0	0	0	0	0	0	0	0	0	0	0	0	0	0	0	0	0	0	0	0	0	0	0
A0A669BDT0	Fibroblast growth factor receptor (EC 2.7.10.1)	fgfr3	Oreochromis niloticus (Nile tilapia) (Tilapia nilotica)	positive regulation of cell population proliferation [GO:0008284]; protein phosphorylation [GO:0006468]	plasma membrane [GO:0005886]	ATP binding [GO:0005524]; fibroblast growth factor receptor activity [GO:0005007]	1.005	-0.91394	ASLIAFSGILK	0	0	0	0	0	0	0	0	0	0	0	0	0	0	0	0	0	0	0	0	0	0	0	0	0	0	0	0	0	0	0	0	0	0	0	0	0	0	0	0
A0A669BDY2	Fc receptor-like protein 5	LOC102080295	Oreochromis niloticus (Nile tilapia) (Tilapia nilotica)		membrane [GO:0016020]		1.0036	-0.98213	KCKWFTQQSK	0	0	0	0	0	0	0	0	0	0	0	0	0	0	0	0	0	0	0	0	0	0	0	0	0	0	0	0	0	0	0	0	0	0	0	0	0	0	0	0
A0A669BDZ5	Syntaxin-3	LOC100701140	Oreochromis niloticus (Nile tilapia) (Tilapia nilotica)	intracellular protein transport [GO:0006886]; vesicle-mediated transport [GO:0016192]	membrane [GO:0016020]	SNAP receptor activity [GO:0005484]	1.0097	-1.3139	NKLKSIER	0	0	0	0	0	0	0	2892.3	0	0	0	0	0	0	0	0	0	0	0	0	0	0	0	0	0	0	0	0	0	0	0	0	0	0	0	0	0	0	2340.5	0
A0A669BE09	Poly(A) specific ribonuclease subunit PAN2	pan2	Oreochromis niloticus (Nile tilapia) (Tilapia nilotica)			exonuclease activity [GO:0004527]; nucleic acid binding [GO:0003676]	1.0115	-0.20905	HIWIPATLKMSISK	0	0	0	0	0	0	0	0	0	0	0	0	0	0	0	0	0	0	0	0	0	0	0	0	0	0	0	0	0	0	0	0	0	0	0	0	0	0	0	0
A0A669BE26	Transcriptional repressor GATA binding 1	trps1	Oreochromis niloticus (Nile tilapia) (Tilapia nilotica)		nucleus [GO:0005634]	DNA-binding transcription factor activity [GO:0003700]; sequence-specific DNA binding [GO:0043565]; zinc ion binding [GO:0008270]	1.0084	-1.2739	GGGGSERGSPIEK	0	0	0	0	0	0	0	0	0	0	0	0	0	0	0	0	0	0	0	0	0	0	0	0	0	0	0	0	0	0	0	0	0	0	0	0	0	0	0	0
A0A669BE36	Reverse transcriptase domain-containing protein		Oreochromis niloticus (Nile tilapia) (Tilapia nilotica)			catalytic activity [GO:0003824]	0.99695	-2.632	GGGTASLTNNTLTTK	0	0	0	0	0	0	0	0	0	0	0	0	0	0	0	0	0	0	0	0	0	0	0	0	0	0	0	0	0	0	0	0	0	0	0	0	0	0	0	0
A0A669BEA5	Cholesterol side-chain cleavage enzyme, mitochondrial (EC 1.14.15.6) (Cholesterol desmolase)		Oreochromis niloticus (Nile tilapia) (Tilapia nilotica)	C21-steroid hormone metabolic process [GO:0008207]; cholesterol metabolic process [GO:0008203]; steroid biosynthetic process [GO:0006694]	mitochondrial inner membrane [GO:0005743]	cholesterol monooxygenase (side-chain-cleaving) activity [GO:0008386]; heme binding [GO:0020037]; iron ion binding [GO:0005506]	0.99128	-0.82934	LHPVAVSLQR	0	0	0	0	0	0	0	0	0	0	0	0	0	0	0	0	0	0	0	0	0	0	0	0	0	0	0	0	0	0	0	0	0	0	0	0	0	1169.4	0	0
A0A669BEB0	Myosin-10	LOC100699125	Oreochromis niloticus (Nile tilapia) (Tilapia nilotica)	system development [GO:0048731]	myosin complex [GO:0016459]	actin filament binding [GO:0051015]; ATP binding [GO:0005524]; cytoskeletal motor activity [GO:0003774]	1.0019	-1.4662	LVWIPSER	0	0	0	0	0	0	0	0	0	0	0	0	0	0	0	0	0	0	0	0	0	0	0	0	0	0	0	0	0	0	0	0	0	0	0	0	0	0	0	0
A0A669BEH6	Uncharacterized protein		Oreochromis niloticus (Nile tilapia) (Tilapia nilotica)				1.0044	-0.96323	VILTEADIR	0	0	0	0	0	0	0	0	0	0	0	0	0	0	0	0	0	0	0	0	0	0	0	0	0	0	0	0	0	0	0	0	0	0	0	0	0	0	0	0
A0A669BEI4	CDK5 regulatory subunit associated protein 2	cdk5rap2	Oreochromis niloticus (Nile tilapia) (Tilapia nilotica)		cytoplasm [GO:0005737]; membrane [GO:0016020]; microtubule organizing center [GO:0005815]		1.0124	-1.1524	ALEQALDEK	0	0	0	0	0	0	0	0	0	0	0	0	0	0	0	0	0	0	0	0	0	0	1022	1139.6	0	0	0	0	0	0	0	0	0	0	0	0	0	0	0	0
A0A669BEJ2	Exocyst complex component Sec8	exoc4	Oreochromis niloticus (Nile tilapia) (Tilapia nilotica)	Golgi to plasma membrane transport [GO:0006893]; protein targeting to membrane [GO:0006612]; vesicle docking involved in exocytosis [GO:0006904]; vesicle tethering involved in exocytosis [GO:0090522]	exocyst [GO:0000145]		0.98864	-0.17093	NKDPSGLLISVIK	0	0	0	0	0	0	0	0	0	0	0	0	0	0	0	0	0	0	0	0	0	0	0	0	0	0	0	0	0	0	0	0	0	0	0	0	0	0	0	0
A0A669BEN1	ribonuclease H (EC 3.1.26.4)		Oreochromis niloticus (Nile tilapia) (Tilapia nilotica)	DNA integration [GO:0015074]	membrane [GO:0016020]	nucleic acid binding [GO:0003676]	0.99913	-1.9528	NIVVRRTAR	0	0	0	0	0	0	0	0	0	0	0	0	0	0	0	0	0	0	0	0	0	0	0	0	0	0	0	0	0	0	0	0	0	0	0	0	0	0	0	0
A0A669BEN5	Glutamate rich 3	erich3	Oreochromis niloticus (Nile tilapia) (Tilapia nilotica)				0.99051	-0.31697	LHQIEIKRK	0	0	0	0	0	0	0	0	0	0	0	0	0	0	0	0	0	0	0	0	0	0	0	0	0	0	0	0	0	0	0	0	0	0	0	0	0	0	0	0
A0A669BF11	Serine/threonine-protein kinase RIO3 (EC 2.7.11.1)		Oreochromis niloticus (Nile tilapia) (Tilapia nilotica)	protein phosphorylation [GO:0006468]		ATP binding [GO:0005524]; metal ion binding [GO:0046872]; protein serine/threonine kinase activity [GO:0004674]	1.0041	-1.0956	LSNQVFNSLK	0	0	0	0	0	0	0	0	0	0	0	0	0	0	0	0	0	0	0	0	0	0	0	0	0	0	0	0	0	0	0	0	0	0	0	0	0	0	0	0
A0A669BFA3	tRNA methyltransferase 10 homolog A (EC 2.1.1.221) (RNA (guanine-9-)-methyltransferase domain-containing protein 2) (tRNA (guanine(9)-N(1))-methyltransferase TRMT10A)		Oreochromis niloticus (Nile tilapia) (Tilapia nilotica)			tRNA (guanine(9)-N(1))-methyltransferase activity [GO:0052905]	1.0024	-1.4662	EATPSSLR	0	0	0	0	0	0	0	0	0	0	0	0	0	0	0	0	0	0	0	0	0	0	0	0	0	0	0	0	0	0	0	0	0	0	0	0	0	0	0	0
A0A669BFC8	Neuron navigator 1	NAV1	Oreochromis niloticus (Nile tilapia) (Tilapia nilotica)	neurogenesis [GO:0022008]			0.99595	-0.63073	RRASDLPR	0	0	0	0	0	0	0	0	404.82	0	0	0	0	0	0	0	0	0	0	0	0	0	0	0	0	0	0	0	0	0	478.21	0	0	0	0	0	0	0	0	0
A0A669BFD1	BTB (POZ) domain containing 7		Oreochromis niloticus (Nile tilapia) (Tilapia nilotica)	morphogenesis of a branching epithelium [GO:0061138]			0.98253	-0.13957	RSPSKPDYPYK	0	0	0	0	0	0	0	0	0	0	0	0	0	0	0	0	0	0	0	0	0	833.26	758.23	765.32	0	0	0	0	0	0	0	0	0	0	0	0	0	0	0	0
A0A669BFD6	non-specific serine/threonine protein kinase (EC 2.7.11.1)		Oreochromis niloticus (Nile tilapia) (Tilapia nilotica)	protein phosphorylation [GO:0006468]	membrane [GO:0016020]	ATP binding [GO:0005524]; magnesium ion binding [GO:0000287]; protein serine/threonine kinase activity [GO:0004674]	1.0025	-2.0925	NVLGPIK	0	0	0	0	0	0	0	0	369.34	0	0	0	0	0	0	0	0	0	0	0	0	0	0	0	806.56	0	828.37	0	0	0	0	0	0	0	0	330.84	0	0	0	0
A0A669BFI1	Phosphoinositide phospholipase C (EC 3.1.4.11)	plcd1	Oreochromis niloticus (Nile tilapia) (Tilapia nilotica)	intracellular signal transduction [GO:0035556]; lipid catabolic process [GO:0016042]		calcium ion binding [GO:0005509]; phosphatidylinositol phospholipase C activity [GO:0004435]	1.0022	-1.4662	SIVDPLVK	0	0	0	0	0	0	0	0	0	0	0	0	0	0	0	0	0	0	0	0	0	0	0	0	0	0	0	0	0	0	0	0	0	0	0	0	0	0	0	0
A0A669BFM5	Inhibitor of nuclear factor kappa-B kinase subunit alpha (EC 2.7.11.10) (Nuclear factor NF-kappa-B inhibitor kinase alpha)		Oreochromis niloticus (Nile tilapia) (Tilapia nilotica)		cytoplasm [GO:0005737]; nucleus [GO:0005634]	ATP binding [GO:0005524]; IkappaB kinase activity [GO:0008384]	1.0142	-1.1741	YETLTTK	0	0	0	0	0	0	0	0	0	0	0	0	0	0	0	0	0	0	0	0	0	0	0	0	0	0	0	0	0	0	0	0	0	0	0	0	0	0	0	0
A0A669BFP2	Phosphofructokinase, platelet b		Oreochromis niloticus (Nile tilapia) (Tilapia nilotica)	fructose 6-phosphate metabolic process [GO:0006002]	cytoplasm [GO:0005737]	6-phosphofructokinase activity [GO:0003872]; ATP binding [GO:0005524]; metal ion binding [GO:0046872]	0.97809	-0.062982	RTLVFQPVAQLR	0	1077.6	0	0	0	0	0	1715.6	0	0	0	0	0	0	0	1882.9	0	0	0	0	0	0	0	0	0	0	0	0	0	0	0	0	0	0	0	0	0	0	0	0
A0A669BFQ1	serine--tRNA ligase (EC 6.1.1.11) (Seryl-tRNA synthetase)	sars2	Oreochromis niloticus (Nile tilapia) (Tilapia nilotica)	seryl-tRNA aminoacylation [GO:0006434]		ATP binding [GO:0005524]; serine-tRNA ligase activity [GO:0004828]	0.98921	-0.13021	GLVTKEDKK	0	0	0	0	0	0	0	0	0	0	0	0	0	0	0	0	0	0	0	0	0	0	0	0	0	0	0	0	0	0	0	0	0	0	0	0	0	0	0	0
A0A669BFY0	Type II inositol 3,4-bisphosphate 4-phosphatase	LOC100702844	Oreochromis niloticus (Nile tilapia) (Tilapia nilotica)			phosphatidylinositol-3,4-bisphosphate 4-phosphatase activity [GO:0016316]	0.99627	-4.1425	ERHALSQQHFSIALDWMR	0	0	0	0	0	0	0	0	0	0	0	0	0	0	0	0	0	0	0	0	0	0	0	0	0	0	0	0	0	0	0	0	0	0	0	0	0	0	0	0
A0A669BG50	Low density lipoprotein receptor-related protein 1Bb		Oreochromis niloticus (Nile tilapia) (Tilapia nilotica)	animal organ development [GO:0048513]; endocytosis [GO:0006897]	membrane [GO:0016020]	calcium ion binding [GO:0005509]	1.0018	-1.3878	GSVAPAR	21934	19867	21145	27885	0	24342	30558	0	30509	0	0	21295	0	0	0	0	15022	0	0	0	0	12148	0	11861	0	0	0	14530	0	0	19347	0	0	0	0	0	0	0	0	0
A0A669BGA6	Neuronal membrane glycoprotein M6-a	LOC100690686	Oreochromis niloticus (Nile tilapia) (Tilapia nilotica)		membrane [GO:0016020]		1.0051	-1.096	EEQELHDIHSTRSKER	0	0	0	0	0	0	0	0	0	0	0	0	0	0	0	0	0	0	0	0	0	0	0	0	0	0	0	0	0	0	0	0	0	0	0	0	0	0	0	0
A0A669BGK9	Mucin-17	LOC100697343	Oreochromis niloticus (Nile tilapia) (Tilapia nilotica)				1.0096	-1.2689	NDTTPRNEK	0	0	0	0	0	0	0	1050.8	0	0	0	0	0	0	0	0	0	0	0	0	0	0	0	0	0	0	0	0	0	0	0	0	0	0	0	0	0	0	0	0
A0A669BGN6	Protoporphyrinogen oxidase (EC 1.3.3.4)		Oreochromis niloticus (Nile tilapia) (Tilapia nilotica)	protoporphyrinogen IX biosynthetic process [GO:0006782]	mitochondrial inner membrane [GO:0005743]	oxygen-dependent protoporphyrinogen oxidase activity [GO:0004729]	0.98468	-0.48256	ALSSVLPR	106140	110230	0	211640	175240	135030	0	188180	0	0	0	0	0	0	0	0	0	0	147860	168130	0	166920	200110	0	0	118860	0	140890	142000	0	151870	166990	75848	0	122610	0	176580	0	178220	37540
A0A669BGS6	Plakophilin 4		Oreochromis niloticus (Nile tilapia) (Tilapia nilotica)	cell-cell adhesion [GO:0098609]			1.014	-1.1741	MASLPSR	0	0	0	0	0	0	0	0	0	0	0	0	0	0	0	0	0	0	0	0	0	0	0	0	0	0	0	0	0	0	0	0	0	0	0	1825.4	0	0	0	0
A0A669BGY0	Ig-like domain-containing protein		Oreochromis niloticus (Nile tilapia) (Tilapia nilotica)				0.99877	-2.5473	EIITMDR	0	0	0	0	0	0	0	0	0	0	0	0	0	0	0	0	0	0	0	0	0	0	0	0	0	0	0	0	0	0	0	0	0	0	0	0	0	0	0	0
A0A669BH09	Retinoblastoma-like protein 2	LOC100692495	Oreochromis niloticus (Nile tilapia) (Tilapia nilotica)	cell cycle [GO:0007049]; chromatin organization [GO:0006325]; regulation of cell cycle [GO:0051726]; regulation of transcription by RNA polymerase II [GO:0006357]	membrane [GO:0016020]; nucleus [GO:0005634]		0.99776	-2.5775	GVKEHFWKPFIK	0	0	0	0	0	1753.9	0	0	0	0	0	0	1371.8	0	0	0	0	0	0	0	0	0	0	0	0	0	0	0	0	0	1371.8	0	0	0	0	0	0	0	0	0
A0A669BH13	Histone-lysine N-methyltransferase EZH2 (EC 2.1.1.356)	ezh2	Oreochromis niloticus (Nile tilapia) (Tilapia nilotica)	histone H3-K27 methylation [GO:0070734]; rhythmic process [GO:0048511]	nucleus [GO:0005634]	histone H3K27 trimethyltransferase activity [GO:0140951]	1.0107	-0.25484	IFEAISSMFPDK	0	674.41	0	0	0	705.77	862.81	0	909.25	0	0	535.25	0	444.63	420.4	0	0	0	0	0	0	0	0	0	0	0	0	0	0	0	0	592.12	0	0	0	0	717.34	706.7	677.29	0
A0A669BH16	acetyl-CoA carboxylase (EC 6.4.1.2)	acacb	Oreochromis niloticus (Nile tilapia) (Tilapia nilotica)	fatty acid biosynthetic process [GO:0006633]; malonyl-CoA biosynthetic process [GO:2001295]		acetyl-CoA carboxylase activity [GO:0003989]; ATP binding [GO:0005524]; metal ion binding [GO:0046872]	1.0022	-1.4538	GHVIAAR	0	0	0	0	0	0	0	4581.2	0	0	0	0	0	0	0	0	0	0	0	0	0	0	0	0	0	0	0	0	0	0	0	0	0	0	0	0	0	0	0	0
A0A669BH76	Tetraspanin	LOC100703058	Oreochromis niloticus (Nile tilapia) (Tilapia nilotica)		membrane [GO:0016020]		0.16923	0.11326	VGQAAVK	0	0	0	0	38108	45698	55954	52801	0	31699	0	34588	29515	29616	0	28583	26323	0	49180	0	46369	52379	48612	0	0	26131	29009	51272	50354	42631	53015	50781	0	0	27996	27301	0	32563	0	32119
A0A669BH77	Coiled-coil domain-containing protein 57	LOC100698614	Oreochromis niloticus (Nile tilapia) (Tilapia nilotica)				0.98657	-0.13006	IKERGDELK	0	0	0	0	0	0	0	0	0	0	0	0	0	0	0	0	0	0	0	0	0	0	0	0	0	0	0	0	0	0	0	0	0	0	0	0	0	0	0	0
A0A669BHB0	DNA helicase (EC 3.6.4.12)		Oreochromis niloticus (Nile tilapia) (Tilapia nilotica)		nucleus [GO:0005634]	ATP binding [GO:0005524]; ATP-dependent chromatin remodeler activity [GO:0140658]	0.98378	-0.38214	FVKSYKK	0	0	0	0	0	0	0	0	0	0	0	0	0	0	0	0	0	0	0	0	0	0	0	0	0	0	0	0	0	0	0	0	0	0	0	0	0	0	0	0
A0A669BHG8	WD repeat domain 17		Oreochromis niloticus (Nile tilapia) (Tilapia nilotica)				1.0055	-1.4765	LITTKTTEAR	0	0	0	0	0	0	0	0	0	0	0	0	0	0	0	0	0	0	0	0	0	0	0	0	0	0	0	0	0	0	0	0	0	0	0	0	0	0	0	0
A0A669BHK6	non-specific serine/threonine protein kinase (EC 2.7.11.1)		Oreochromis niloticus (Nile tilapia) (Tilapia nilotica)	protein phosphorylation [GO:0006468]	cytoplasm [GO:0005737]	ATP binding [GO:0005524]; protein serine/threonine kinase activity [GO:0004674]	1.0103	-1.1524	SLLSGLLIK	0	0	0	0	0	0	0	0	0	0	0	641.74	0	0	0	0	0	0	0	0	0	0	0	0	0	0	0	0	0	0	0	0	0	0	0	0	0	0	0	0
A0A669BHS2	NLR family CARD domain containing 3	nlrc3	Oreochromis niloticus (Nile tilapia) (Tilapia nilotica)	innate immune response [GO:0045087]; regulation of apoptotic process [GO:0042981]	cytoplasm [GO:0005737]		0.99795	-1.0518	TNRTLTK	0	0	0	0	0	0	0	0	0	0	0	0	0	0	0	0	0	0	0	0	0	0	0	0	0	0	0	0	0	0	0	0	0	0	0	0	0	0	0	0
A0A669BHX8	Glutamate receptor-interacting protein 2	LOC100691544	Oreochromis niloticus (Nile tilapia) (Tilapia nilotica)				1.0023	-0.91841	KPGEPLIISDIK	0	0	0	0	0	0	0	0	0	0	0	0	0	0	0	0	0	0	0	0	0	0	0	0	0	0	0	0	0	0	0	0	0	0	0	0	0	0	0	0
A0A669BHY3	ELM2 and SANT domain-containing protein 1	LOC100694763	Oreochromis niloticus (Nile tilapia) (Tilapia nilotica)		nucleus [GO:0005634]		1.0014	-1.4662	TTPSTGNK	0	0	0	0	0	0	0	0	0	0	0	0	0	0	0	0	0	0	0	0	0	0	0	0	0	0	0	0	0	0	0	0	0	0	0	0	0	0	0	0
A0A669BHY5	Transposase Tc1-like domain-containing protein		Oreochromis niloticus (Nile tilapia) (Tilapia nilotica)	DNA integration [GO:0015074]; DNA transposition [GO:0006313]		DNA binding [GO:0003677]	1.0075	-1.1149	TPLLQPR	20859	22782	29141	32917	35680	29236	38923	38301	37297	30074	31392	32805	27634	28281	29805	0	18424	0	0	35179	41190	35605	42013	44691	28232	23523	26610	29769	29537	38944	33625	35077	29799	21165	23583	24827	36350	0	36170	21650
A0A669BIR7	Reverse transcriptase domain-containing protein		Oreochromis niloticus (Nile tilapia) (Tilapia nilotica)	DNA metabolic process [GO:0006259]		nucleic acid binding [GO:0003676]; RNA-DNA hybrid ribonuclease activity [GO:0004523]	1.0106	-1.1741	VQYQALR	0	0	0	0	0	0	0	0	0	0	0	0	0	0	0	0	0	0	0	0	0	0	0	0	0	0	0	0	0	0	0	0	0	0	0	0	0	0	0	0
A0A669BIV7	HECT-type E3 ubiquitin transferase (EC 2.3.2.26)	HECW1	Oreochromis niloticus (Nile tilapia) (Tilapia nilotica)	protein ubiquitination [GO:0016567]		ubiquitin-protein transferase activity [GO:0004842]	0.99895	-1.0176	RAGGSAHR	1909	0	0	0	0	0	0	0	0	0	0	0	0	0	0	0	0	0	0	0	0	0	0	0	0	0	0	0	0	0	0	0	1615.6	0	0	0	0	0	0	0
A0A669BJ21	RIMS binding protein 2		Oreochromis niloticus (Nile tilapia) (Tilapia nilotica)				1.0022	-1.4324	GLLSKGKK	461.81	0	0	0	0	0	0	0	0	0	0	0	0	0	0	380.22	0	0	0	0	0	0	0	0	0	0	0	0	0	0	0	0	0	0	0	0	0	0	0	0
A0A669BJ49	DH domain-containing protein		Oreochromis niloticus (Nile tilapia) (Tilapia nilotica)			guanyl-nucleotide exchange factor activity [GO:0005085]	1.0007	-1.0538	LWVHYLKR	0	0	0	0	0	0	0	0	0	0	0	0	0	0	0	0	0	0	0	0	0	0	0	0	0	0	0	0	0	0	0	0	0	0	0	0	0	0	0	0
A0A669BJ85	DNA helicase (EC 3.6.4.12) (ATP-dependent helicase ATRX)	LOC100690413	Oreochromis niloticus (Nile tilapia) (Tilapia nilotica)	DNA repair [GO:0006281]	chromosome, telomeric region [GO:0000781]; nucleus [GO:0005634]	ATP binding [GO:0005524]; ATP hydrolysis activity [GO:0016887]; ATP-dependent chromatin remodeler activity [GO:0140658]; DNA binding [GO:0003677]; metal ion binding [GO:0046872]	0	0.41375	SPRVKTTPLR	651.55	653.28	0	0	0	430.33	0	0	0	0	0	0	0	0	0	0	0	0	0	0	0	0	0	0	0	0	0	0	1071.7	0	0	724.83	0	0	0	0	0	0	0	0
A0A669BJ87	NACHT domain-containing protein		Oreochromis niloticus (Nile tilapia) (Tilapia nilotica)			metal ion binding [GO:0046872]	0.95858	-0.019384	VNALHGTPIR	0	0	0	0	0	0	4336.6	0	0	0	0	0	0	0	0	0	0	0	0	0	0	0	0	3447.9	0	0	0	0	0	0	0	0	0	0	0	0	0	4780.9	0	0
A0A669BJG0	Substance-K receptor (NK-2 receptor) (Neurokinin A receptor) (Tachykinin receptor 2)	tacr2	Oreochromis niloticus (Nile tilapia) (Tilapia nilotica)		plasma membrane [GO:0005886]	tachykinin receptor activity [GO:0004995]	1.0139	-1.1741	LSSTSTK	0	0	0	0	0	0	0	0	0	0	0	0	0	0	0	0	0	0	0	0	0	0	0	0	0	0	0	0	0	0	0	0	0	0	0	0	0	0	0	0
A0A669BJH9	Trichohyalin	LOC100690222	Oreochromis niloticus (Nile tilapia) (Tilapia nilotica)			small GTPase binding [GO:0031267]	1.0043	-0.85512	EEMERLEEER	0	0	0	0	0	0	0	0	0	0	0	0	0	0	0	0	0	0	0	0	0	1883.9	0	1938.7	0	0	0	0	0	0	0	0	0	0	0	0	0	0	0	0
A0A669BJP3	DH domain-containing protein		Oreochromis niloticus (Nile tilapia) (Tilapia nilotica)				1.0019	-1.4662	DLCFNVQR	0	0	0	0	0	0	0	0	0	0	0	0	0	0	0	0	0	0	0	0	0	0	0	0	0	0	0	0	0	0	0	0	0	0	0	0	0	0	0	0
A0A669BJV0	Semaphorin-3ab	LOC100706207	Oreochromis niloticus (Nile tilapia) (Tilapia nilotica)	axon guidance [GO:0007411]		semaphorin receptor binding [GO:0030215]	0.99925	-0.9321	LLTLPLMAGDLHSLLPDEDR	0	0	0	0	0	0	0	0	11348	0	0	0	0	0	0	0	0	0	0	5198.7	0	0	0	0	1263.9	0	0	2312.6	1977	0	0	0	0	0	0	0	0	0	0	0
A0A669BK01	Transcription elongation factor SPT5	supt5h	Oreochromis niloticus (Nile tilapia) (Tilapia nilotica)	regulation of DNA-templated transcription elongation [GO:0032784]; regulation of transcription by RNA polymerase II [GO:0006357]; transcription elongation-coupled chromatin remodeling [GO:0140673]	nucleus [GO:0005634]		0.99651	-7.0239	AEEAEVSNIDHVVLDEDHSGSR	0	0	0	0	0	0	0	0	0	0	0	0	0	0	0	0	0	0	0	0	0	0	0	0	0	0	0	0	0	663.8	0	0	0	0	0	0	0	0	0	0
A0A669BK46	Cytoskeleton associated protein 5	ckap5	Oreochromis niloticus (Nile tilapia) (Tilapia nilotica)	establishment or maintenance of microtubule cytoskeleton polarity [GO:0030951]; microtubule polymerization [GO:0046785]; regulation of cellular component organization [GO:0051128]; spindle organization [GO:0007051]	cytoplasm [GO:0005737]; kinetochore [GO:0000776]	microtubule plus end polymerase [GO:0061863]; microtubule plus-end binding [GO:0051010]	0.99725	-1.0326	EGLTELYEYK	0	0	0	0	0	0	0	0	0	0	0	0	0	0	0	0	0	0	0	0	0	0	0	0	0	0	0	0	0	0	0	0	0	0	0	0	0	0	0	0
A0A669BK61	Cytohesin Ubiquitin Protein Inducing domain-containing protein		Oreochromis niloticus (Nile tilapia) (Tilapia nilotica)		cytoplasm [GO:0005737]		1.0022	-1.4662	NLFSGALR	0	0	0	0	0	0	0	0	0	0	0	0	0	0	0	0	0	0	0	0	0	0	0	0	0	0	0	0	0	0	0	0	0	0	0	0	0	0	0	0
A0A669BKF5	Notchless protein homolog 1		Oreochromis niloticus (Nile tilapia) (Tilapia nilotica)	Notch signaling pathway [GO:0007219]	nucleolus [GO:0005730]		0.99135	-0.63073	TVKVWRAK	0	0	0	0	0	0	0	0	0	0	0	0	0	0	0	0	0	0	0	0	0	0	0	0	0	0	0	0	0	0	0	0	0	0	0	2453.2	0	0	0	0
A0A669BKI7	DEAH (Asp-Glu-Ala-His) box polypeptide 32b		Oreochromis niloticus (Nile tilapia) (Tilapia nilotica)			helicase activity [GO:0004386]	0.9863	-0.76167	KELPVWK	0	0	0	0	0	0	0	0	0	0	0	0	0	0	0	0	0	0	0	0	0	0	0	0	0	0	0	0	0	0	0	0	0	0	0	0	1876.7	0	0	0
A0A669BKV8	G protein-coupled receptor kinase (EC 2.7.11.-)	grk6	Oreochromis niloticus (Nile tilapia) (Tilapia nilotica)	protein phosphorylation [GO:0006468]; signal transduction [GO:0007165]	cytoplasm [GO:0005737]	ATP binding [GO:0005524]; G protein-coupled receptor kinase activity [GO:0004703]	1.0024	-1.4662	GQPSPTPK	1909	1990	0	0	0	0	0	0	2996.5	0	0	0	0	0	0	0	0	0	0	0	0	0	0	0	0	0	0	0	0	0	0	0	0	0	2975.4	0	0	0	0	0
A0A669BL16	Tripartite motif containing 36	trim36	Oreochromis niloticus (Nile tilapia) (Tilapia nilotica)		cytoskeleton [GO:0005856]	zinc ion binding [GO:0008270]	1.0063	-1.5983	IQKATESLR	0	0	0	79116	81278	0	0	0	101440	0	0	0	0	48124	0	0	0	0	0	0	0	0	72268	0	0	0	53697	72103	0	0	0	0	0	0	0	0	72451	0	0	0
A0A669BL75	Transmembrane protein 56-B	LOC100706733	Oreochromis niloticus (Nile tilapia) (Tilapia nilotica)		membrane [GO:0016020]		0.99183	-0.31697	VLTGRGGRK	0	0	0	0	0	0	0	0	0	0	0	0	0	0	0	0	0	0	0	0	0	0	0	0	0	0	0	0	0	0	0	0	0	0	0	0	0	0	0	0
A0A669BL92	B30.2/SPRY domain-containing protein		Oreochromis niloticus (Nile tilapia) (Tilapia nilotica)				1.0043	-0.88423	LTELDLSIK	0	0	0	0	0	0	0	0	0	0	0	0	0	0	0	0	0	0	0	0	0	0	0	0	0	0	0	0	0	0	0	0	0	0	0	0	0	0	0	0
A0A669BLB3	Sodium leak channel, non-selective	nalcn	Oreochromis niloticus (Nile tilapia) (Tilapia nilotica)		membrane [GO:0016020]	monoatomic cation channel activity [GO:0005261]	1.0143	-1.1741	AIDSFPR	0	0	0	0	1288.2	0	0	0	0	0	0	0	0	0	0	0	0	0	0	0	0	0	0	0	0	0	0	0	0	0	0	0	0	0	0	0	0	0	0	0
A0A669BLF3	TRASH domain-containing protein		Oreochromis niloticus (Nile tilapia) (Tilapia nilotica)			zinc ion binding [GO:0008270]	0.99557	-2.8935	AHRKTPLTLK	0	0	0	0	0	0	0	532.81	643.16	0	0	0	0	0	0	0	0	0	0	0	0	0	0	0	0	0	0	0	0	0	422.61	0	0	0	0	0	0	0	0	320.23
A0A669BLI7	Collagen, type XXVIII, alpha 2a		Oreochromis niloticus (Nile tilapia) (Tilapia nilotica)	cell adhesion [GO:0007155]	cellular anatomical entity [GO:0110165]; collagen trimer [GO:0005581]	serine-type endopeptidase inhibitor activity [GO:0004867]	0.98125	-0.39719	REPVKLDVAVR	0	0	0	0	0	0	0	0	0	0	0	0	0	0	0	0	0	0	0	0	0	0	0	0	0	0	0	0	0	0	0	0	0	0	0	0	0	0	0	0
A0A669BLJ9	Regulating synaptic membrane exocytosis 2	RIMS2	Oreochromis niloticus (Nile tilapia) (Tilapia nilotica)	exocytosis [GO:0006887]	membrane [GO:0016020]; synapse [GO:0045202]	metal ion binding [GO:0046872]; small GTPase binding [GO:0031267]	0.99764	-1.0518	MTRQASR	0	0	0	889.36	0	0	0	0	0	0	0	0	0	0	0	0	0	0	0	0	0	0	0	0	0	0	0	0	0	0	0	0	0	0	0	0	0	0	0	0
A0A669BLN7	Uncharacterized LOC100712394	LOC100712394	Oreochromis niloticus (Nile tilapia) (Tilapia nilotica)		nascent polypeptide-associated complex [GO:0005854]		1.0145	-1.1741	PGESTHR	0	0	0	0	0	0	0	0	0	0	0	0	0	0	0	0	0	0	0	0	0	0	0	0	0	0	0	0	0	0	0	0	0	0	0	0	0	0	0	0
A0A669BLQ9	Synaptopodin 2-like a		Oreochromis niloticus (Nile tilapia) (Tilapia nilotica)				0.9825	-0.033812	IDKEYRAALR	0	0	0	0	0	0	0	2212.5	1938.8	0	0	0	0	0	0	0	0	0	0	0	0	0	0	1173.4	0	0	0	0	0	976.64	0	0	0	0	0	0	0	0	0	0
A0A669BLS0	WD repeat and HMG-box DNA binding protein 1	wdhd1	Oreochromis niloticus (Nile tilapia) (Tilapia nilotica)				1.0121	-1.1524	FLAVPVETK	0	0	0	0	0	0	0	0	0	0	0	0	0	0	0	0	0	0	0	0	0	0	0	0	0	0	0	0	0	0	0	0	0	0	0	0	0	0	0	0
A0A669BLX1	Regulator of G-protein signaling 6	LOC100709782	Oreochromis niloticus (Nile tilapia) (Tilapia nilotica)	G protein-coupled receptor signaling pathway [GO:0007186]; intracellular signal transduction [GO:0035556]; negative regulation of signal transduction [GO:0009968]; regulation of G protein-coupled receptor signaling pathway [GO:0008277]			1.002	-1.4579	SVVSVPLR	0	21157	23687	0	0	27786	36973	0	34645	0	0	0	0	20448	18587	17129	18063	0	0	0	33594	0	0	0	0	21042	0	26840	0	35480	0	33002	0	19766	0	0	0	0	24298	0
A0A669BLX7	Tankyrase 1-binding protein C-terminal domain-containing protein		Oreochromis niloticus (Nile tilapia) (Tilapia nilotica)				0.99803	-3.5565	LRQQELEK	1334	1289.5	0	1157	1463.7	1185.2	3018.5	3543.8	3229.3	905.44	811.25	754.7	0	621.85	657.8	0	0	427.16	1644.5	1468.3	0	3384.9	3425.9	2969.6	488.41	0	0	1986.4	1798.2	1784.4	1049.6	1132.1	1026.4	0	0	0	0	787.17	733.67	724.84
A0A669BM00	Mitochondrial ribosomal protein L37	mrpl37	Oreochromis niloticus (Nile tilapia) (Tilapia nilotica)	translation [GO:0006412]	mitochondrion [GO:0005739]; ribosome [GO:0005840]	structural constituent of ribosome [GO:0003735]	1.0036	-1.4662	GEDLLQIR	0	0	0	0	0	0	0	0	0	0	0	0	0	0	0	0	0	0	0	0	0	0	637.99	0	0	0	0	0	0	688.99	0	0	0	0	0	0	0	0	0	0
A0A669BME9	RNA helicase (EC 3.6.4.13)	LOC100706682	Oreochromis niloticus (Nile tilapia) (Tilapia nilotica)			ATP binding [GO:0005524]; hydrolase activity [GO:0016787]; nucleic acid binding [GO:0003676]; RNA helicase activity [GO:0003724]	0.99841	-3.248	AVACTQPR	0	0	0	0	27205	0	0	0	0	0	0	0	0	0	0	0	0	33224	0	0	0	0	0	0	0	0	22727	0	0	0	0	0	0	0	0	0	0	0	0	0
A0A669BMH4	Dynein cytoplasmic 2 heavy chain 1	DYNC2H1	Oreochromis niloticus (Nile tilapia) (Tilapia nilotica)	microtubule-based movement [GO:0007018]	cytoplasm [GO:0005737]; dynein complex [GO:0030286]; microtubule [GO:0005874]	ATP binding [GO:0005524]; dynein intermediate chain binding [GO:0045505]; dynein light intermediate chain binding [GO:0051959]; minus-end-directed microtubule motor activity [GO:0008569]	1.0009	-1.6879	IAALGANLK	2032.9	2205.8	70226	103850	861.75	0	5093.4	4822.8	5480.4	0	0	0	0	0	0	1075.8	1007.3	1137.9	0	111810	1021.3	1061.1	125190	950.37	0	63451	0	1963.8	1977.6	1507.7	1812.2	1696.1	1682	0	0	0	0	79702	89838	61739
A0A669BMH6	von Willebrand factor A domain containing 2	vwa2	Oreochromis niloticus (Nile tilapia) (Tilapia nilotica)	anatomical structure development [GO:0048856]			0.98672	-0.58384	QELKKQIK	1439	0	0	0	1438.4	0	0	0	0	0	1674.7	0	0	0	0	0	0	0	0	1387.8	0	0	0	0	0	0	0	1390.5	0	0	0	0	0	0	0	0	0	0	0	0
A0A669BML9	Coiled-coil domain-containing protein		Oreochromis niloticus (Nile tilapia) (Tilapia nilotica)		membrane [GO:0016020]		0.96878	-0.15216	VEKERLLK	0	0	0	0	0	0	0	0	0	0	0	0	0	0	0	0	0	0	0	0	0	0	0	0	0	0	0	0	0	0	0	0	0	0	0	0	0	0	0	0
A0A669BMP0	Ig-like domain-containing protein		Oreochromis niloticus (Nile tilapia) (Tilapia nilotica)				0.99639	-2.9194	FILSRFR	0	0	0	0	0	0	0	0	0	0	0	0	0	0	0	0	0	0	0	0	0	0	0	0	0	0	0	0	0	0	0	0	0	0	0	0	0	0	0	0
A0A669BMQ2	H-2 class II histocompatibility antigen, E-S beta chain	LOC100708205	Oreochromis niloticus (Nile tilapia) (Tilapia nilotica)	antigen processing and presentation [GO:0019882]; immune response [GO:0006955]	MHC class II protein complex [GO:0042613]		0.9967	-0.8319	AILTKSVQPSVRIK	0	0	0	0	0	0	0	0	0	0	0	0	0	0	0	0	0	0	0	0	0	0	0	0	0	986.92	0	0	0	0	0	0	0	0	0	0	3851.4	0	0	0
A0A669BMU7	Solute carrier family 43 member 1	slc43a1	Oreochromis niloticus (Nile tilapia) (Tilapia nilotica)		membrane [GO:0016020]	transmembrane transporter activity [GO:0022857]	1.0095	-1.2909	KIQKVTNAMR	0	0	0	0	0	0	0	0	0	0	0	0	0	0	0	0	0	0	0	0	0	0	0	0	0	0	0	0	0	0	0	0	0	0	0	0	0	0	0	0
A0A669BMW2	receptor protein serine/threonine kinase (EC 2.7.11.30)	LOC100709886	Oreochromis niloticus (Nile tilapia) (Tilapia nilotica)	protein phosphorylation [GO:0006468]	cytoplasm [GO:0005737]; membrane [GO:0016020]	ATP binding [GO:0005524]; transmembrane receptor protein serine/threonine kinase activity [GO:0004675]	0	0.22369	RSMCALR	0	0	0	0	0	0	0	0	0	0	0	0	0	0	0	0	0	0	0	0	0	2413.2	8506.8	2245.1	0	0	0	0	0	0	0	0	0	0	0	0	0	0	0	0
A0A669BMW7	NHL repeat containing E3 ubiquitin protein ligase 1		Oreochromis niloticus (Nile tilapia) (Tilapia nilotica)				0.98521	-0.4752	ALPGFSALLTHIK	0	0	0	0	0	0	0	0	0	0	0	0	0	0	0	0	0	0	0	0	0	0	0	0	0	0	0	0	0	0	0	0	0	0	0	0	0	0	0	0
A0A669BMX1	Reverse transcriptase domain-containing protein		Oreochromis niloticus (Nile tilapia) (Tilapia nilotica)				0.99393	-0.33863	RRGVNLR	0	0	0	0	0	0	0	0	0	0	0	0	0	0	0	0	0	0	0	0	0	0	0	0	0	0	0	0	0	0	0	0	0	0	0	0	0	0	0	0
A0A669BMZ3	Ankyrin repeat domain 6b		Oreochromis niloticus (Nile tilapia) (Tilapia nilotica)				1.0015	-1.9853	IAYLEDELR	0	0	0	0	0	531.94	0	0	0	304.91	0	0	0	0	0	0	0	0	0	0	619.31	0	0	0	0	0	0	0	0	0	0	0	0	0	0	0	273.64	0	0	0
A0A669BN18	Fibrillar collagen NC1 domain-containing protein	col1a2	Oreochromis niloticus (Nile tilapia) (Tilapia nilotica)			extracellular matrix structural constituent [GO:0005201]	1.0014	-1.4662	GPPGPNGK	0	0	0	3310.8	0	0	0	0	0	0	0	0	0	0	0	0	0	0	0	3008.4	0	0	0	0	0	0	0	0	0	0	0	0	0	0	0	3296.7	0	0	0	0
A0A669BN31	Reverse transcriptase domain-containing protein		Oreochromis niloticus (Nile tilapia) (Tilapia nilotica)				1.0152	-1.1741	HGLIQCK	0	0	0	0	0	0	0	0	0	0	0	0	0	0	0	0	0	0	0	0	0	0	0	0	0	0	0	0	0	0	0	0	0	0	0	0	0	0	0	0
A0A669BN61	Epithelial splicing regulatory protein 1	esrp1	Oreochromis niloticus (Nile tilapia) (Tilapia nilotica)			RNA binding [GO:0003723]	0.99864	-1.0518	HKEILGK	0	0	0	0	0	0	0	0	0	0	0	0	0	0	0	0	0	0	0	0	0	0	0	0	0	0	0	0	0	0	0	0	0	0	0	0	0	0	0	0
A0A669BN83	START domain-containing protein		Oreochromis niloticus (Nile tilapia) (Tilapia nilotica)	lipid transport [GO:0006869]; proteolysis [GO:0006508]		aspartic-type endopeptidase activity [GO:0004190]; lipid binding [GO:0008289]	1.0075	-1.234	LRQEVTESAR	0	0	0	0	0	0	0	0	0	0	0	0	0	0	0	0	0	0	0	0	0	675.15	1802.8	1670.8	0	0	0	0	0	0	0	0	0	0	0	0	0	0	0	0
A0A669BND9	Acyl-CoA synthetase long chain family member 3b		Oreochromis niloticus (Nile tilapia) (Tilapia nilotica)	lipid metabolic process [GO:0006629]			1.0017	-1.4662	AILCDVPR	0	0	0	0	0	0	0	0	1418.8	0	0	0	0	0	0	0	0	0	0	0	0	0	0	0	0	0	0	0	0	0	0	0	0	0	0	0	0	0	0	0
A0A669BNE4	Zgc:103508	C17orf49	Oreochromis niloticus (Nile tilapia) (Tilapia nilotica)				0.99424	-0.76908	VPISSESPK	990.55	0	989.22	0	1100.4	0	1239.9	1362.1	0	0	0	1330.1	0	918.79	0	0	0	695.51	0	1122.7	1286.5	0	0	0	0	0	3045.8	0	0	0	977.55	903.43	986.67	1256.7	1518.4	0	0	0	0	0
A0A669BNF0	Pre-mRNA-processing factor 6 (PRP6 homolog) (U5 snRNP-associated 102 kDa protein)	prpf6	Oreochromis niloticus (Nile tilapia) (Tilapia nilotica)	mRNA splicing, via spliceosome [GO:0000398]			0.9938	-0.33473	ILVSIYGMTQQMR	0	0	0	0	0	0	0	0	0	0	0	0	0	0	0	0	0	0	556.02	0	0	0	0	0	0	0	0	0	0	0	0	0	0	0	0	0	0	0	0	0
A0A669BNJ0	G protein-coupled receptor 158	gpr158	Oreochromis niloticus (Nile tilapia) (Tilapia nilotica)		plasma membrane [GO:0005886]	G protein-coupled receptor activity [GO:0004930]	0.99286	-0.33863	YKCHCRK	0	0	0	0	0	0	0	0	0	0	0	0	0	0	0	0	0	0	0	0	0	0	0	0	0	0	0	537.81	0	0	0	0	0	0	0	0	0	0	0	0
A0A669BNM4	Reverse transcriptase domain-containing protein		Oreochromis niloticus (Nile tilapia) (Tilapia nilotica)		membrane [GO:0016020]	2-oxoglutarate-dependent dioxygenase activity [GO:0016706]; methyltransferase activity [GO:0008168]	0.9962	-3.0069	ARVTFQR	0	0	0	0	0	0	0	0	0	0	0	0	0	0	0	0	0	0	0	0	0	0	0	0	0	0	0	0	0	0	0	0	0	0	0	0	0	0	0	0
A0A669BNR2	TTF-type domain-containing protein		Oreochromis niloticus (Nile tilapia) (Tilapia nilotica)			protein dimerization activity [GO:0046983]	0.6	0.11326	LEVTFFNCVVDSALISLQER	0	0	0	0	0	0	466.45	0	0	0	0	0	0	0	0	0	0	0	4498.3	0	0	0	0	0	0	0	0	0	0	0	0	0	0	0	0	0	0	0	0	0
A0A669BNR4	RNA cytidine acetyltransferase (EC 2.3.1.-) (18S rRNA cytosine acetyltransferase)	NAT10	Oreochromis niloticus (Nile tilapia) (Tilapia nilotica)	ribosomal small subunit biogenesis [GO:0042274]; rRNA modification [GO:0000154]; tRNA acetylation [GO:0051391]	nucleolus [GO:0005730]	ATP binding [GO:0005524]; N-acetyltransferase activity [GO:0008080]	0.050847	0.12371	KDLGFSSNR	0	0	0	0	0	0	0	0	0	0	0	0	0	0	0	0	0	0	0	0	0	0	0	0	0	0	0	0	0	0	0	0	0	0	0	0	0	0	0	0
A0A669BNR9	[tau protein] kinase (EC 2.7.11.26)	GSK3A	Oreochromis niloticus (Nile tilapia) (Tilapia nilotica)	negative regulation of signal transduction [GO:0009968]; protein phosphorylation [GO:0006468]	cytoplasm [GO:0005737]	ATP binding [GO:0005524]; protein serine/threonine kinase activity [GO:0004674]; tau-protein kinase activity [GO:0050321]	1.0143	-1.1741	FLGDSGK	0	0	0	0	0	0	0	0	0	0	0	0	0	0	0	0	0	0	0	0	0	0	0	0	0	0	0	0	0	0	0	0	0	0	0	0	0	0	0	0
A0A669BNW1	Carnosine dipeptidase 2		Oreochromis niloticus (Nile tilapia) (Tilapia nilotica)	proteolysis [GO:0006508]		metal ion binding [GO:0046872]; metallodipeptidase activity [GO:0070573]	0.91667	0.068337	FSDIITR	0	0	0	0	0	0	0	0	0	0	0	0	0	0	0	0	0	0	0	0	0	0	0	0	0	0	0	0	0	0	0	0	0	0	0	0	0	0	0	0
A0A669BP07	P-type domain-containing protein		Oreochromis niloticus (Nile tilapia) (Tilapia nilotica)	carbohydrate metabolic process [GO:0005975]	membrane [GO:0016020]	alpha-glucosidase activity [GO:0090599]; carbohydrate binding [GO:0030246]	0.99629	-4.6478	ALQRVFGANR	0	0	0	0	0	0	0	0	0	0	0	0	0	0	0	0	0	0	0	0	0	0	0	0	0	0	0	0	0	0	0	0	0	0	0	0	0	0	0	0
A0A669BPF2	DNA replication complex GINS protein PSF3	gins3	Oreochromis niloticus (Nile tilapia) (Tilapia nilotica)	DNA replication [GO:0006260]	GINS complex [GO:0000811]		0.99355	-2.8394	EAICCNR	0	0	0	0	0	0	0	0	116570	0	0	0	0	0	0	0	0	0	0	0	0	0	124250	0	0	0	0	75208	0	0	0	130550	0	0	0	0	0	0	0	0
A0A669BPK7	F-actin monooxygenase (EC 1.14.13.225)	LOC100701520	Oreochromis niloticus (Nile tilapia) (Tilapia nilotica)	animal organ development [GO:0048513]	cytoplasm [GO:0005737]	actin binding [GO:0003779]; metal ion binding [GO:0046872]	0.98349	-0.4567	ERLNYWKAK	0	0	0	0	0	0	0	0	0	0	0	0	0	0	0	0	0	0	0	0	0	0	0	0	0	0	0	0	0	0	0	0	0	0	0	0	0	0	0	0
A0A669BPM4	60S ribosomal export protein NMD3	nmd3	Oreochromis niloticus (Nile tilapia) (Tilapia nilotica)	protein transport [GO:0015031]	cytoplasm [GO:0005737]; nucleus [GO:0005634]	ribosomal large subunit binding [GO:0043023]	0.99777	-1.7441	AVVQVRQK	0	0	0	0	0	0	0	0	0	0	0	0	0	0	0	0	0	0	0	0	0	6190.4	6065.8	5699.8	0	0	0	0	0	0	0	0	0	0	0	0	0	0	0	0
A0A669BPN8	Cilia- and flagella-associated protein 45		Oreochromis niloticus (Nile tilapia) (Tilapia nilotica)		motile cilium [GO:0031514]		0	0.30452	KEKEMEIAK	0	0	1001	0	0	0	0	0	0	0	0	0	0	0	0	0	0	0	0	0	0	0	0	0	0	0	0	0	0	0	0	0	0	0	0	0	0	881.22	0	0
A0A669BPS0	adenylate cyclase (EC 4.6.1.1)	adcy2	Oreochromis niloticus (Nile tilapia) (Tilapia nilotica)	cAMP biosynthetic process [GO:0006171]; intracellular signal transduction [GO:0035556]	plasma membrane [GO:0005886]	adenylate cyclase activity [GO:0004016]; ATP binding [GO:0005524]; metal ion binding [GO:0046872]	0.99831	-1.0518	ALEKEYR	0	928.7	0	0	0	0	0	0	0	0	0	0	0	0	0	0	0	0	0	0	0	0	0	0	0	0	0	0	0	0	0	0	0	0	0	0	0	0	0	0
A0A669BPU2	Uncharacterized LOC100705730	LOC100705730	Oreochromis niloticus (Nile tilapia) (Tilapia nilotica)				1.0062	-0.9086	ATASTAVKNTEK	0	0	0	0	0	0	0	0	0	0	0	0	0	0	0	0	0	0	0	0	0	2900.2	3130.5	3120.7	0	0	0	0	0	0	0	0	0	0	0	0	0	0	0	0
A0A669BQ02	RING-type E3 ubiquitin transferase (EC 2.3.2.27)		Oreochromis niloticus (Nile tilapia) (Tilapia nilotica)		cytoplasm [GO:0005737]	zinc ion binding [GO:0008270]	1.0099	-0.10515	AKREAGSTSPVVR	0	0	0	0	0	0	0	0	0	0	0	0	0	0	0	0	0	0	0	0	0	0	4320.5	0	0	0	0	0	0	0	0	0	0	0	0	0	0	0	0	0
A0A669BQ29	Integrin, alpha 11b		Oreochromis niloticus (Nile tilapia) (Tilapia nilotica)	cell adhesion [GO:0007155]; integrin-mediated signaling pathway [GO:0007229]	integrin complex [GO:0008305]	metal ion binding [GO:0046872]	0.97692	-0.031602	TNQISRLSAPLR	0	0	0	0	0	0	0	0	0	0	0	0	0	0	0	0	0	0	0	0	0	0	0	0	0	0	0	0	0	0	0	0	0	0	0	0	0	0	0	0
A0A669BQB5	Y-box binding protein 1	ybx1	Oreochromis niloticus (Nile tilapia) (Tilapia nilotica)			nucleic acid binding [GO:0003676]	1.0092	-1.3439	TLITKHFK	0	0	0	0	2750.2	0	0	0	0	0	0	0	0	0	0	0	0	0	0	0	0	0	0	0	0	0	0	0	0	0	0	0	0	0	0	0	0	0	0	0
A0A669BQC6	Calcium-transporting ATPase (EC 7.2.2.10)	LOC100710397	Oreochromis niloticus (Nile tilapia) (Tilapia nilotica)		sarcoplasmic reticulum membrane [GO:0033017]	ATP binding [GO:0005524]; ATP hydrolysis activity [GO:0016887]; P-type calcium transporter activity [GO:0005388]	0.99777	-1.7377	LTSIKSTTLR	0	0	0	1525.9	1430.8	0	1280.8	0	0	0	0	1142.8	1139.5	1067.3	1062.6	1251.2	0	1304.9	1663.8	0	0	732.32	0	668.19	0	0	1208.8	0	0	0	1379.7	0	1318.7	880.11	0	0	1212.8	0	0	1631.8
A0A669BQD2	Fatty acid synthase (EC 1.1.1.100) (EC 1.3.1.39) (EC 2.3.1.38) (EC 2.3.1.39) (EC 2.3.1.41) (EC 2.3.1.85) (EC 3.1.2.14) (EC 4.2.1.59)		Oreochromis niloticus (Nile tilapia) (Tilapia nilotica)	fatty acid biosynthetic process [GO:0006633]		(3R)-hydroxyacyl-[acyl-carrier-protein] dehydratase activity [GO:0019171]; (3R)-hydroxymyristoyl-[acyl-carrier-protein] dehydratase activity [GO:0008659]; 3-oxoacyl-[acyl-carrier-protein] reductase (NADPH) activity [GO:0004316]; 3-oxoacyl-[acyl-carrier-protein] synthase activity [GO:0004315]; [acyl-carrier-protein] S-acetyltransferase activity [GO:0004313]; [acyl-carrier-protein] S-malonyltransfe…	0.99721	-3.065	ELANSKPEGTR	0	0	0	0	0	0	0	0	0	0	0	0	0	0	0	0	0	0	0	0	0	0	0	0	0	0	4071.6	0	0	0	0	0	0	0	0	0	0	0	0	0
A0A669BQH8	Cytochrome P450 family 4 subfamily F member 8		Oreochromis niloticus (Nile tilapia) (Tilapia nilotica)		membrane [GO:0016020]	heme binding [GO:0020037]; iron ion binding [GO:0005506]; monooxygenase activity [GO:0004497]; oxidoreductase activity, acting on paired donors, with incorporation or reduction of molecular oxygen [GO:0016705]	1.0111	-0.20905	KDFVDIILLTKVR	0	0	0	0	0	0	0	0	0	0	0	0	0	0	0	0	0	0	0	0	0	0	0	0	0	0	0	0	0	0	0	0	0	0	0	0	0	0	0	0
A0A669BQI1	Ligand dependent nuclear receptor interacting factor 1	lrif1	Oreochromis niloticus (Nile tilapia) (Tilapia nilotica)	regulation of DNA-templated transcription [GO:0006355]		nuclear retinoic acid receptor binding [GO:0042974]	0.99896	-2.2653	KVSDHLLR	0	0	0	0	309.57	0	0	0	0	0	0	0	0	0	0	0	0	0	0	0	0	0	0	0	0	0	0	0	0	0	0	0	0	0	355.81	330.84	0	0	0	0
A0A669BQK5	receptor protein-tyrosine kinase (EC 2.7.10.1)	LOC100710555	Oreochromis niloticus (Nile tilapia) (Tilapia nilotica)	cytokine-mediated signaling pathway [GO:0019221]; protein phosphorylation [GO:0006468]; transmembrane receptor protein tyrosine kinase signaling pathway [GO:0007169]	plasma membrane [GO:0005886]	ATP binding [GO:0005524]; cytokine binding [GO:0019955]; transmembrane receptor protein tyrosine kinase activity [GO:0004714]	1.0041	-1.1103	NVLLTDRHVAK	0	0	0	0	0	0	0	0	0	0	0	0	0	0	0	0	0	370.95	0	0	0	0	0	0	0	0	0	0	0	0	0	0	0	0	0	0	0	0	0	0
A0A669BQQ0	Histone acetyltransferase (EC 2.3.1.48)	kat2a	Oreochromis niloticus (Nile tilapia) (Tilapia nilotica)	histone acetylation [GO:0016573]; regulation of DNA-templated transcription [GO:0006355]	cytoplasm [GO:0005737]; microtubule organizing center [GO:0005815]; nucleus [GO:0005634]	histone acetyltransferase activity [GO:0004402]	0.99689	-6.7438	NLLAQIKTHPDAWPFMEPVKK	0	0	0	0	0	0	0	0	0	0	0	0	0	0	0	0	0	0	0	0	0	652.79	0	0	0	0	0	0	0	0	0	0	0	0	0	0	0	0	0	0
A0A669BR14	Phospholipid phosphatase 5	plpp5	Oreochromis niloticus (Nile tilapia) (Tilapia nilotica)	phospholipid metabolic process [GO:0006644]	membrane [GO:0016020]	phosphatidate phosphatase activity [GO:0008195]	0.99319	-0.33732	RLLRGFLSEISIR	0	0	0	0	0	0	0	0	0	0	0	0	0	0	0	0	0	0	0	0	0	0	0	0	0	0	0	0	0	0	0	0	0	0	0	0	0	0	0	0
A0A669BR22	Bromodomain and PHD finger containing 1	brpf1	Oreochromis niloticus (Nile tilapia) (Tilapia nilotica)			metal ion binding [GO:0046872]	0.99747	-5.6368	HIDPLPPQPRDSEEKQTALK	0	0	0	0	0	0	0	0	0	0	0	0	0	0	0	0	0	0	0	0	0	0	0	0	0	0	0	0	0	0	0	0	0	0	0	0	0	0	0	0
A0A669BR43	Selenoprotein O	selenoo	Oreochromis niloticus (Nile tilapia) (Tilapia nilotica)			ATP binding [GO:0005524]; metal ion binding [GO:0046872]; nucleotidyltransferase activity [GO:0016779]	1.0024	-1.4594	EVVLRTAR	0	0	0	0	0	3947.9	0	0	0	0	0	0	2932.3	0	3176.6	0	0	0	0	0	0	0	2021.1	0	0	0	0	0	0	0	0	0	0	0	0	0	0	0	0	0
A0A669BR65	Nucleolar GTP-binding protein 2	gnl2	Oreochromis niloticus (Nile tilapia) (Tilapia nilotica)		nucleolus [GO:0005730]	GTP binding [GO:0005525]	1.0136	-1.1741	IWGELYK	0	0	0	0	0	0	0	0	0	0	0	0	0	0	0	0	0	0	0	0	0	0	0	0	0	0	0	0	0	0	0	0	0	0	0	0	0	0	0	0
A0A669BRJ3	AT-rich interactive domain-containing protein 1A	LOC100698130	Oreochromis niloticus (Nile tilapia) (Tilapia nilotica)	chromatin remodeling [GO:0006338]	brahma complex [GO:0035060]; SWI/SNF complex [GO:0016514]	DNA binding [GO:0003677]	0.99938	-2.4884	ALHALAK	0	0	0	0	0	0	0	0	0	0	0	0	0	0	0	0	0	0	0	0	0	0	0	0	0	0	0	0	0	0	0	0	0	0	0	0	0	0	0	0
A0A669BRU4	Ig-like domain-containing protein		Oreochromis niloticus (Nile tilapia) (Tilapia nilotica)				0.98541	-0.76167	RFIHNTR	0	0	0	0	0	0	0	0	0	0	0	0	0	0	0	0	0	0	0	0	0	0	0	0	0	0	0	0	0	0	0	0	0	0	0	0	0	0	0	0
A0A669BRY6	GREB1 like retinoic acid receptor coactivator	greb1l	Oreochromis niloticus (Nile tilapia) (Tilapia nilotica)		membrane [GO:0016020]		1.0021	-1.9702	LGSEQIPLR	0	0	0	5139.8	4870	0	0	0	0	0	4502.2	0	0	0	0	0	0	0	0	0	0	0	0	0	15841	0	0	0	0	0	0	0	0	0	0	0	0	0	0	0
A0A669BSA8	Endothelial cell adhesion molecule	esam	Oreochromis niloticus (Nile tilapia) (Tilapia nilotica)	cell-cell adhesion [GO:0098609]	membrane [GO:0016020]		1.0115	-1.1741	VPPSVPK	3214.9	0	3169.6	4545.9	4308.7	4007.5	5406.8	0	5021.6	3596.3	3781.5	3758.1	3257.3	3170.2	3207.6	2556.6	2448.4	2517	0	3460.4	3763.3	2279.6	2092.1	1972.2	13962	13298	0	2245.3	2062.2	2179.5	3254.5	2928.7	2791.7	4861.5	4917.5	4256.9	1852.8	0	1896.4	3041.9
A0A669BSD2	Membrane associated guanylate kinase, WW and PDZ domain containing 1	magi1	Oreochromis niloticus (Nile tilapia) (Tilapia nilotica)		membrane [GO:0016020]		0.9964	-2.9387	QIVDYPRCR	2430.9	2424.2	2054.7	1295.7	0	1319.3	0	0	1285.6	1272.2	0	0	0	0	0	0	568.21	524	1856.7	0	1883.3	1464.4	0	1466.2	691.9	571.27	0	2970.3	0	3218.2	0	0	0	0	517.98	0	0	0	0	0
A0A669BSM8	Reverse transcriptase/retrotransposon-derived protein RNase H-like domain-containing protein		Oreochromis niloticus (Nile tilapia) (Tilapia nilotica)		membrane [GO:0016020]		0.9942	-0.7318	KCPGAGK	0	0	0	0	0	0	0	0	0	0	0	0	0	0	0	0	0	0	0	0	0	0	0	0	0	0	0	0	0	0	0	0	0	0	0	0	0	0	0	0
A0A669BSS2	Sodium channel protein	SCN8A	Oreochromis niloticus (Nile tilapia) (Tilapia nilotica)	regulation of monoatomic ion transmembrane transport [GO:0034765]	voltage-gated sodium channel complex [GO:0001518]	voltage-gated monoatomic ion channel activity [GO:0005244]; voltage-gated sodium channel activity [GO:0005248]	1.0034	-2.0736	IDKAPTTEVEVK	0	0	0	0	0	0	0	0	0	0	0	0	0	0	0	0	0	0	0	0	0	0	0	0	0	0	0	0	0	0	0	0	0	0	0	0	0	0	0	0
A0A669BST4	NACHT domain-containing protein		Oreochromis niloticus (Nile tilapia) (Tilapia nilotica)				1.0124	-0.2797	KEASRIISHIK	0	0	0	0	0	0	0	0	0	0	0	0	0	0	0	0	0	0	0	0	0	0	0	0	0	0	0	0	0	0	0	0	0	0	0	0	0	0	0	0
A0A669BST6	HAT C-terminal dimerisation domain-containing protein		Oreochromis niloticus (Nile tilapia) (Tilapia nilotica)			protein dimerization activity [GO:0046983]	0.98826	-0.63073	SLQRRLFR	0	0	0	0	0	0	0	0	0	0	0	0	0	0	0	0	0	0	0	0	0	0	0	0	0	0	0	0	0	0	0	0	0	0	0	0	0	0	0	0
A0A669BST8	Uncharacterized protein		Oreochromis niloticus (Nile tilapia) (Tilapia nilotica)				1.0023	-2.1769	ACSSRLR	0	0	0	0	0	0	0	0	0	0	0	0	0	0	0	0	0	0	0	0	0	0	790.63	0	0	0	0	0	0	0	0	0	0	0	0	0	0	0	0	0
A0A669BT13	Cyclin-dependent kinase 17	LOC100697880	Oreochromis niloticus (Nile tilapia) (Tilapia nilotica)	protein phosphorylation [GO:0006468]	cytoplasm [GO:0005737]	ATP binding [GO:0005524]; protein kinase activity [GO:0004672]	0.99355	-2.8367	LADFGLAR	0	0	0	0	0	0	0	0	0	0	0	0	0	0	0	0	0	0	0	0	0	0	0	0	0	0	0	0	0	0	0	0	0	0	0	0	0	0	0	0
A0A669BT29	Uncharacterized protein		Oreochromis niloticus (Nile tilapia) (Tilapia nilotica)				0.98987	-0.31697	KSLRLASEK	0	0	0	0	0	0	0	0	0	0	0	0	0	0	0	0	0	0	0	0	0	0	0	0	0	0	0	0	0	0	0	0	0	0	0	0	1801.2	0	0	0
A0A669BT67	Reverse transcriptase domain-containing protein		Oreochromis niloticus (Nile tilapia) (Tilapia nilotica)				0.99735	-2.5982	IDYFFLDKK	0	0	0	0	0	0	0	0	0	0	0	0	0	0	0	0	0	0	0	0	0	0	673.66	0	0	0	0	0	0	0	0	0	0	0	0	0	0	0	0	0
A0A669BT75	Protein HID1	LOC100699128	Oreochromis niloticus (Nile tilapia) (Tilapia nilotica)				0.99658	-2.9194	AVERLVR	0	0	0	0	0	0	0	0	0	0	0	0	0	0	0	0	95100	0	0	0	0	0	0	0	0	0	0	0	0	0	0	0	0	0	0	0	0	0	0	0
A0A669BTA6	Transmembrane protein 150B	tmem150b	Oreochromis niloticus (Nile tilapia) (Tilapia nilotica)		membrane [GO:0016020]		1.0129	-1.1741	WWVGPVR	0	0	0	0	0	0	0	0	0	0	0	0	0	0	0	0	0	0	0	0	0	0	0	0	0	0	0	0	0	0	0	0	0	0	0	0	0	0	0	0
A0A669BTG1	Enhancer of polycomb homolog	LOC100694393	Oreochromis niloticus (Nile tilapia) (Tilapia nilotica)	regulation of transcription by RNA polymerase II [GO:0006357]	nucleus [GO:0005634]; Piccolo NuA4 histone acetyltransferase complex [GO:0032777]		0.97882	-0.39155	NRKNDEASYEK	0	0	0	0	0	0	0	0	0	0	0	0	0	0	0	0	0	0	0	0	0	0	0	0	0	0	0	0	0	0	0	0	0	0	0	0	0	0	0	0
A0A669BTH9	Non-homologous end joining factor 1	nhej1	Oreochromis niloticus (Nile tilapia) (Tilapia nilotica)	double-strand break repair [GO:0006302]	nucleus [GO:0005634]		1.005	-0.19217	ATSLQTKEEESGPVQMIPSSR	0	0	0	0	0	0	0	0	0	0	0	0	0	0	0	0	0	0	0	0	0	0	0	574.33	0	0	0	0	0	0	0	0	0	0	0	0	0	0	0	0
A0A669BTI8	Spen family transcriptional repressor	spen	Oreochromis niloticus (Nile tilapia) (Tilapia nilotica)			RNA binding [GO:0003723]	0.99719	-2.9239	LKLGFGK	0	0	0	0	0	0	0	0	0	0	1293.9	0	0	0	0	0	0	0	0	0	0	0	0	0	0	0	0	0	0	0	0	0	0	0	0	0	0	0	0	0
A0A669BTJ0	NAD(+) kinase (EC 2.7.1.23)	LOC100706290	Oreochromis niloticus (Nile tilapia) (Tilapia nilotica)	NAD metabolic process [GO:0019674]; NADP biosynthetic process [GO:0006741]; phosphorylation [GO:0016310]		NAD+ kinase activity [GO:0003951]	1.0118	-1.3439	MPVIRHTR	0	0	0	0	0	0	0	0	0	0	0	0	0	0	0	0	0	0	0	0	0	0	0	0	0	0	0	0	0	0	0	0	0	0	0	0	0	0	0	0
A0A669BTW4	Kinesin family member 1Ab		Oreochromis niloticus (Nile tilapia) (Tilapia nilotica)	microtubule-based movement [GO:0007018]; system development [GO:0048731]		ATP binding [GO:0005524]; microtubule binding [GO:0008017]; microtubule motor activity [GO:0003777]	0.98679	-0.11515	YLKVLRVWLEAR	703.72	0	608.28	673.07	0	0	779.2	0	0	0	0	0	0	0	0	0	636.46	618.86	0	648.29	641.98	0	0	0	0	0	0	493.8	446.09	0	0	0	0	0	0	0	529.18	0	0	1016
A0A669BU34	Voltage-dependent N-type calcium channel subunit alpha		Oreochromis niloticus (Nile tilapia) (Tilapia nilotica)	regulation of monoatomic ion transmembrane transport [GO:0034765]	voltage-gated calcium channel complex [GO:0005891]	metal ion binding [GO:0046872]; voltage-gated calcium channel activity [GO:0005245]	1.007	-1.5903	VIDPPLGLGKK	0	0	0	0	0	0	0	0	0	0	0	0	0	0	0	0	0	0	0	0	0	0	0	0	0	0	0	0	0	0	0	0	0	0	0	0	0	0	0	0
A0A669BU47	Immunoglobulin mu DNA binding protein 2	ighmbp2	Oreochromis niloticus (Nile tilapia) (Tilapia nilotica)			ATP binding [GO:0005524]; DNA binding [GO:0003677]; helicase activity [GO:0004386]; zinc ion binding [GO:0008270]	0.99639	-2.9194	MMKGNLR	0	0	0	0	0	0	0	0	0	0	0	0	0	0	0	0	0	0	0	0	0	0	0	0	0	0	0	0	0	0	0	0	0	0	849.46	0	0	0	0	0
A0A669BU48	RCC1 and BTB domain-containing protein 1	LOC100701531	Oreochromis niloticus (Nile tilapia) (Tilapia nilotica)				1.0044	-0.97329	YIHVHKAVLK	0	0	0	0	0	0	0	0	0	0	0	0	0	0	0	0	0	0	0	0	0	0	0	0	0	0	0	0	0	0	0	0	0	0	0	0	0	0	0	0
A0A669BU71	TANK binding kinase 1	tbk1	Oreochromis niloticus (Nile tilapia) (Tilapia nilotica)	protein phosphorylation [GO:0006468]	cytoplasm [GO:0005737]	ATP binding [GO:0005524]; protein kinase activity [GO:0004672]	1.0038	-1.1072	AIKLQEQLPQK	0	0	0	0	0	0	0	0	0	0	0	0	0	0	0	0	0	0	0	0	0	0	0	0	0	0	0	0	0	0	0	0	0	0	0	0	0	0	0	0
A0A669BU73	F-actin monooxygenase (EC 1.14.13.225)		Oreochromis niloticus (Nile tilapia) (Tilapia nilotica)	animal organ development [GO:0048513]	cytoplasm [GO:0005737]	actin binding [GO:0003779]; FAD binding [GO:0071949]; metal ion binding [GO:0046872]; monooxygenase activity [GO:0004497]	1.0081	-1.1282	KRSSLFSPR	4370.6	0	4680	0	0	2951	534.25	0	0	354.45	0	0	1577.9	1606.3	1558.7	0	1794.8	1541.4	4052.9	0	0	3349.3	3262.2	0	0	2768.8	2986.4	7792.8	0	0	2224.2	2314.6	0	0	1083.4	1019	4739.6	4780.9	4937.2	0
A0A669BU80	Thrombospondin 3	thbs3	Oreochromis niloticus (Nile tilapia) (Tilapia nilotica)	anatomical structure development [GO:0048856]; cell adhesion [GO:0007155]	extracellular region [GO:0005576]	calcium ion binding [GO:0005509]	1.0081	-0.91394	LGGVLLGIYSK	0	0	0	0	0	0	0	0	0	0	0	0	0	0	0	0	0	0	0	0	0	0	0	0	0	0	0	0	0	0	0	0	0	0	0	0	0	0	0	0
A0A669BUD3	Aquarius intron-binding spliceosomal factor	aqr	Oreochromis niloticus (Nile tilapia) (Tilapia nilotica)	mRNA splicing, via spliceosome [GO:0000398]	spliceosomal complex [GO:0005681]	helicase activity [GO:0004386]	1.0014	-2.3904	LVVAMSRAR	535.48	0	0	0	0	0	490.48	0	0	0	0	0	0	0	0	0	0	0	0	0	0	0	0	524.3	0	0	0	0	0	0	0	574.11	0	567.23	0	0	0	529.99	0	0
A0A669BUK7	RTF1 homolog, Paf1/RNA polymerase II complex component		Oreochromis niloticus (Nile tilapia) (Tilapia nilotica)			DNA binding [GO:0003677]	0.99828	-1.0301	NKTAELLAK	0	0	0	0	0	0	0	0	0	0	0	0	0	0	0	0	0	0	0	0	0	0	0	0	0	0	0	0	0	0	0	0	0	0	0	0	0	0	0	0
A0A669BUL3	Calcitonin related polypeptide beta	calcb	Oreochromis niloticus (Nile tilapia) (Tilapia nilotica)		extracellular region [GO:0005576]	hormone activity [GO:0005179]	1.0055	-0.96073	VTLTDYEAR	0	0	1219.9	0	0	0	0	0	0	0	0	0	0	0	0	0	0	0	0	0	0	0	0	0	0	0	0	0	0	0	0	0	0	0	0	943.64	0	0	0	0
A0A669BUS2	protein-tyrosine-phosphatase (EC 3.1.3.48)	ptpn12	Oreochromis niloticus (Nile tilapia) (Tilapia nilotica)	protein dephosphorylation [GO:0006470]	intracellular organelle [GO:0043229]	non-membrane spanning protein tyrosine phosphatase activity [GO:0004726]	0.99168	-0.31697	KGVRGNDNK	0	0	0	0	0	0	0	0	0	0	0	0	0	0	0	0	0	0	0	0	0	0	0	0	0	1454.1	0	0	0	0	0	0	0	0	0	0	0	0	0	0
A0A669BUW7	Secreted protein		Oreochromis niloticus (Nile tilapia) (Tilapia nilotica)				0.9858	-0.60285	TLLVTNDER	4569.6	0	3880.9	0	0	3004.2	5637	0	5655.8	0	0	2750.7	1305	1254.3	1157.1	0	0	0	0	5019.7	5088.3	3983.8	3984.1	3405.4	2267.7	2305.9	0	9563.4	9202.9	9113.1	0	0	2607.4	0	0	1119.9	5534.6	5786.4	5754.9	0
A0A669BUX5	Zinc finger protein 516		Oreochromis niloticus (Nile tilapia) (Tilapia nilotica)				1.005	-1.3655	LLGHLTLSSHKNQYCVNLDK	0	0	0	0	0	0	9049.9	0	0	0	0	0	0	0	0	0	0	0	0	0	0	0	0	0	0	0	0	0	0	0	0	0	0	0	0	0	0	0	0	0
A0A669BUY2	IkappaB kinase (EC 2.7.11.10)	LOC100692869	Oreochromis niloticus (Nile tilapia) (Tilapia nilotica)		cytoplasm [GO:0005737]; nucleus [GO:0005634]	ATP binding [GO:0005524]; IkappaB kinase activity [GO:0008384]	1.0017	-1.0301	AIELYKQLK	0	0	0	0	0	0	0	0	0	0	0	0	0	0	0	0	0	0	0	0	0	0	0	0	0	530.4	0	880.44	843.6	0	0	0	0	0	0	0	0	0	0	0
A0A669BV25	Protein phosphatase 1 regulatory inhibitor subunit 1A	PPP1R1A	Oreochromis niloticus (Nile tilapia) (Tilapia nilotica)	signal transduction [GO:0007165]		protein phosphatase inhibitor activity [GO:0004864]	1.0047	-0.2797	AALLNSPRQRR	0	0	0	0	0	0	0	0	0	0	0	0	0	0	0	0	0	0	0	0	0	0	0	0	0	0	0	0	0	0	0	0	0	0	0	0	0	0	798.69	0
A0A669BV57	Plastin 3	PLS3	Oreochromis niloticus (Nile tilapia) (Tilapia nilotica)	actin filament bundle assembly [GO:0051017]		actin filament binding [GO:0051015]; calcium ion binding [GO:0005509]	0.9998	-2.5179	SRSLSLSK	0	0	0	0	0	0	0	0	0	0	0	0	0	0	0	0	0	0	0	0	0	0	0	0	0	0	0	0	0	0	0	0	0	0	0	964.15	0	0	0	0
A0A669BV61	Argonaute RISC component 4		Oreochromis niloticus (Nile tilapia) (Tilapia nilotica)	regulation of translation [GO:0006417]; RNA-mediated gene silencing [GO:0031047]	P-body [GO:0000932]; ribonucleoprotein complex [GO:1990904]	RNA binding [GO:0003723]	0.9983	-1.0518	DWRKPNK	0	0	0	0	1100.4	0	0	0	0	0	0	0	0	0	0	0	0	0	0	0	0	0	0	0	0	0	0	0	0	0	0	0	0	0	0	0	0	0	0	0
A0A669BV63	Centrosomal protein 131	cep131	Oreochromis niloticus (Nile tilapia) (Tilapia nilotica)	intraciliary transport involved in cilium assembly [GO:0035735]	cilium [GO:0005929]		1.0032	-2.0297	LSQKEERR	0	0	0	0	0	0	0	0	0	0	0	0	0	0	0	0	0	0	0	0	0	0	0	0	0	0	0	0	0	0	0	0	0	0	0	0	0	0	0	0
A0A669BVA8	Collagen alpha-2(VI) chain	LOC100700514	Oreochromis niloticus (Nile tilapia) (Tilapia nilotica)		cellular anatomical entity [GO:0110165]		0.99862	-3.4912	AKEFIENVAR	0	0	0	0	0	0	0	1964.3	0	0	0	0	0	0	0	0	0	0	0	0	0	0	0	0	0	0	0	0	0	0	0	0	0	0	0	0	0	0	0	0
A0A669BVD9	C1q and TNF related 4		Oreochromis niloticus (Nile tilapia) (Tilapia nilotica)				1.0114	-1.1741	SAFSVGR	0	0	0	0	0	0	0	0	0	0	0	0	0	0	0	0	0	0	0	0	0	0	0	0	0	0	0	0	0	0	0	0	0	0	0	0	0	0	0	0
A0A669BVK8	Si:dkey-46i9.6		Oreochromis niloticus (Nile tilapia) (Tilapia nilotica)			zinc ion binding [GO:0008270]	1.0023	-1.0749	HSVELNK	0	0	0	0	0	0	0	0	0	0	0	0	0	0	0	0	0	0	0	0	0	2370.7	0	2223.9	0	0	0	0	0	0	0	0	0	0	0	0	0	0	0	0
A0A669BVN0	Integrin subunit alpha 1	itga1	Oreochromis niloticus (Nile tilapia) (Tilapia nilotica)	cell adhesion [GO:0007155]; integrin-mediated signaling pathway [GO:0007229]	integrin complex [GO:0008305]	metal ion binding [GO:0046872]	1.0114	-1.1741	YPFESPR	0	0	0	0	0	0	0	0	0	0	0	0	0	0	0	0	0	0	0	0	0	0	0	0	0	0	0	0	0	0	0	0	0	0	0	0	0	0	0	0
A0A669BVQ1	C2H2-type domain-containing protein		Oreochromis niloticus (Nile tilapia) (Tilapia nilotica)				0.9983	-1.0518	HVMRHGI	0	0	0	0	866.44	0	0	0	0	0	0	0	0	0	0	0	0	0	0	0	0	0	0	0	0	0	0	0	0	0	0	0	0	0	0	0	0	0	0	0
A0A669BVZ4	Zinc-binding protein A33	LOC100711390	Oreochromis niloticus (Nile tilapia) (Tilapia nilotica)			zinc ion binding [GO:0008270]	0.98014	-0.39719	VQAFHAKRQIK	0	0	0	0	0	0	0	0	0	0	0	0	0	0	0	0	0	0	0	0	0	0	0	0	0	0	0	0	0	0	0	0	0	0	0	0	0	0	0	0
A0A669BW14	Janus kinase and microtubule-interacting protein 2	LOC100711386	Oreochromis niloticus (Nile tilapia) (Tilapia nilotica)			kinase binding [GO:0019900]; microtubule binding [GO:0008017]	0.9709	-0.1567	LKAALNAMRDGSGEK	0	0	0	0	0	0	0	0	0	0	0	0	0	0	0	0	0	0	0	0	0	0	0	0	0	0	0	0	0	0	0	0	0	0	0	0	0	0	0	0
A0A669BW51	Transporter		Oreochromis niloticus (Nile tilapia) (Tilapia nilotica)		membrane [GO:0016020]	symporter activity [GO:0015293]	0.99567	0.0078376	SILHGEEER	673.27	0	0	0	0	0	0	941.48	0	0	0	0	0	0	0	0	0	0	0	0	0	0	0	0	0	0	0	0	0	0	0	0	0	0	0	0	0	0	0	0
A0A669BWF7	Rho GTPase activating protein 42	arhgap42	Oreochromis niloticus (Nile tilapia) (Tilapia nilotica)	signal transduction [GO:0007165]	cytoplasm [GO:0005737]	GTPase activator activity [GO:0005096]	1.0117	-1.1741	SDDQNYR	0	0	0	0	0	0	0	0	0	0	0	0	0	0	0	0	0	0	0	0	0	0	0	0	3192.4	2987.2	0	0	841.35	0	0	1112.2	0	0	0	0	0	0	0	1118.8
A0A669BWH3	SPARC-like protein 1	LOC100693466	Oreochromis niloticus (Nile tilapia) (Tilapia nilotica)		extracellular space [GO:0005615]	calcium ion binding [GO:0005509]	0.99794	-1.0301	ETSGKEMAK	0	0	0	0	0	0	0	0	0	0	0	0	0	0	0	0	0	0	0	0	0	0	0	0	0	0	0	0	0	0	0	0	0	0	0	0	0	0	0	0
A0A669BWH7	Histone H2A		Oreochromis niloticus (Nile tilapia) (Tilapia nilotica)		nucleosome [GO:0000786]; nucleus [GO:0005634]	DNA binding [GO:0003677]; protein heterodimerization activity [GO:0046982]; structural constituent of chromatin [GO:0030527]	0.986	-0.35766	AGLQFPVGR	0	0	0	0	0	0	0	0	0	0	0	0	0	0	0	0	0	0	0	0	0	728.32	687.44	670.93	0	0	0	0	0	0	0	0	0	0	0	0	0	0	0	0
A0A669BWH8	Glutamate receptor	grik4	Oreochromis niloticus (Nile tilapia) (Tilapia nilotica)		postsynaptic membrane [GO:0045211]	ionotropic glutamate receptor activity [GO:0004970]	1.0004	-0.92151	LAITLAKDSINR	0	0	0	0	0	0	0	0	0	0	0	0	0	0	0	0	0	0	0	0	0	0	0	0	0	0	0	0	0	0	0	0	0	0	0	0	0	0	0	0
A0A669BWQ5	COMM domain containing 2	commd2	Oreochromis niloticus (Nile tilapia) (Tilapia nilotica)				0.99868	-1.0538	IALEFLRR	0	0	0	0	0	0	0	0	0	0	0	0	0	0	0	0	0	0	0	0	0	0	0	0	0	0	0	0	0	0	0	0	0	0	0	0	0	0	0	0
A0A669BWS5	Syntaphilin	LOC100708666	Oreochromis niloticus (Nile tilapia) (Tilapia nilotica)		membrane [GO:0016020]		0.98332	-0.74001	RTPAAASNR	0	0	0	0	0	0	0	0	0	0	0	0	0	0	0	0	0	0	0	0	0	0	0	0	0	0	0	0	0	0	0	0	0	0	0	0	0	0	0	0
A0A669BWS9	LLGL scribble cell polarity complex component 2		Oreochromis niloticus (Nile tilapia) (Tilapia nilotica)	exocytosis [GO:0006887]			0.98919	-0.78821	GLMVIWDLEK	0	0	0	0	0	0	0	0	478.75	0	0	0	0	0	0	0	0	0	0	0	0	634.62	633.31	590.09	0	0	0	479.99	473.87	0	0	0	0	0	0	0	0	0	0	0
A0A669BWU2	Transcription factor 7-like 1-B	LOC100693117	Oreochromis niloticus (Nile tilapia) (Tilapia nilotica)	Wnt signaling pathway [GO:0016055]	nucleus [GO:0005634]	DNA binding [GO:0003677]	1.0085	-0.91394	TSSTASASEPK	0	0	0	0	0	0	0	0	0	0	0	0	0	0	0	0	0	0	0	0	0	0	0	0	0	0	0	0	0	0	0	0	0	0	0	0	0	0	0	0
A0A669BWZ8	Collagen type IV alpha 2 chain	col4a2	Oreochromis niloticus (Nile tilapia) (Tilapia nilotica)		basement membrane [GO:0005604]; collagen trimer [GO:0005581]; membrane [GO:0016020]	extracellular matrix structural constituent [GO:0005201]	0.99358	-0.31697	GDKGEKGPR	0	0	0	0	0	0	0	0	0	0	0	0	0	0	0	0	0	0	0	0	0	0	0	0	0	0	0	0	0	0	0	0	0	0	0	0	0	0	0	0
A0A669BX03	FYVE, RhoGEF and PH domain-containing protein 4	LOC100693441	Oreochromis niloticus (Nile tilapia) (Tilapia nilotica)		cytoplasm [GO:0005737]; cytoskeleton [GO:0005856]	guanyl-nucleotide exchange factor activity [GO:0005085]; metal ion binding [GO:0046872]	0.9958	-2.9737	IASELLHTEK	0	0	0	0	0	0	0	0	0	0	0	160120	0	0	0	0	0	0	0	0	0	0	0	726.1	0	0	0	0	0	0	0	0	0	0	0	0	0	0	0	0
A0A669BX28	G protein-coupled receptor kinase (EC 2.7.11.-)	LOC100689749	Oreochromis niloticus (Nile tilapia) (Tilapia nilotica)	protein phosphorylation [GO:0006468]; signal transduction [GO:0007165]	cytoplasm [GO:0005737]	ATP binding [GO:0005524]; G protein-coupled receptor kinase activity [GO:0004703]	1.0047	-0.8695	NRKVNHQLLFPK	0	0	0	0	0	0	0	0	0	0	0	0	0	0	0	0	0	0	0	0	0	0	0	0	0	0	0	0	0	0	0	0	0	0	0	0	0	0	0	0
A0A669BX70	Lysine (K)-specific demethylase 7Ab	KDM7A	Oreochromis niloticus (Nile tilapia) (Tilapia nilotica)	chromatin organization [GO:0006325]	nucleus [GO:0005634]	dioxygenase activity [GO:0051213]; metal ion binding [GO:0046872]	0.99	-0.6413	LSRHNRVFV	0	0	0	0	0	0	0	0	0	0	0	0	0	0	0	0	0	0	0	110660	0	0	0	0	0	0	0	0	0	0	0	0	0	0	0	0	0	0	0	0
A0A669BXG6	Protein phosphatase 4 regulatory subunit 3B	ppp4r3b	Oreochromis niloticus (Nile tilapia) (Tilapia nilotica)				0.98008	-0.39719	FMRRIIGLK	0	0	0	0	0	0	0	0	0	0	0	0	0	3262	0	0	0	0	0	0	0	0	0	0	0	0	0	0	0	0	2664.8	0	0	0	0	0	0	0	0	0
A0A669BXG9	DEP domain containing 5, GATOR1 subcomplex subunit	depdc5	Oreochromis niloticus (Nile tilapia) (Tilapia nilotica)	intracellular signal transduction [GO:0035556]		GTPase activator activity [GO:0005096]	0.99574	-2.6849	AYQDVIVNIVDPK	2550.1	0	2561.5	2748.8	2750.2	0	0	2892.3	2891.4	2750.7	2692.3	2565.5	2309.1	0	2212.1	2269.8	2285.4	2106.3	2679.4	2624.5	2710.2	1478.7	1487	1499	4753.5	4910.1	0	0	1798.8	1942.5	0	2462.7	0	2651	2702.3	2453.2	2353.8	0	0	2789.6
A0A669BXM8	Calponin-homology (CH) domain-containing protein		Oreochromis niloticus (Nile tilapia) (Tilapia nilotica)	actomyosin structure organization [GO:0031032]; regulation of cell adhesion [GO:0030155]; regulation of signaling [GO:0023051]		actin binding [GO:0003779]	0.99391	-0.63073	DEGNRRLK	0	0	0	0	0	0	0	0	0	0	0	0	0	0	0	0	0	0	0	0	0	0	0	0	0	0	0	0	476.52	0	0	0	0	0	0	0	0	0	0	0
A0A669BXN1	5-beta-cholestane-3-alpha,7-alpha-diol 12-alpha-hydroxylase	CYP8B1	Oreochromis niloticus (Nile tilapia) (Tilapia nilotica)		endoplasmic reticulum [GO:0005783]; membrane [GO:0016020]	heme binding [GO:0020037]; iron ion binding [GO:0005506]; monooxygenase activity [GO:0004497]; oxidoreductase activity, acting on paired donors, with incorporation or reduction of molecular oxygen [GO:0016705]	0.99323	-0.33732	LDFRKVALHLVHR	0	0	0	0	0	0	0	0	0	0	0	0	0	0	0	0	0	0	0	0	0	0	0	0	0	0	0	0	0	0	0	0	0	0	0	0	0	0	0	0
A0A669BXP8	Annexin	anxa6	Oreochromis niloticus (Nile tilapia) (Tilapia nilotica)			calcium ion binding [GO:0005509]; calcium-dependent phospholipid binding [GO:0005544]	0.99442	-0.79704	TLLILCGGED	0	0	0	0	0	0	0	0	0	0	0	0	0	0	0	0	0	0	0	0	0	0	0	0	0	0	0	0	0	0	0	0	0	0	0	0	0	0	0	0
A0A669BXU1	Paired amphipathic helix protein Sin3a	LOC100694434	Oreochromis niloticus (Nile tilapia) (Tilapia nilotica)		nucleus [GO:0005634]	transcription corepressor activity [GO:0003714]	1	-2.2321	LMHRPEGR	0	458.31	0	0	0	0	0	0	0	0	0	0	0	0	0	0	0	0	0	0	0	0	0	0	0	0	0	0	0	0	304.2	0	0	0	0	0	0	0	0	0
A0A669BY49	DNA-directed RNA polymerase subunit (EC 2.7.7.6)	polr3a	Oreochromis niloticus (Nile tilapia) (Tilapia nilotica)	DNA-templated transcription [GO:0006351]	DNA-directed RNA polymerase complex [GO:0000428]; nuclear lumen [GO:0031981]	DNA binding [GO:0003677]; DNA-directed 5'-3' RNA polymerase activity [GO:0003899]	0.99412	-2.6998	ADFLCCR	0	0	0	0	0	0	0	0	0	0	0	0	0	0	0	0	0	0	0	0	0	0	0	0	0	0	0	0	0	0	0	0	0	0	0	0	0	0	0	0
A0A669BY68	Protein FAM83G	FAM83G	Oreochromis niloticus (Nile tilapia) (Tilapia nilotica)				0.99232	-0.33863	MMKARLK	0	0	0	0	877	0	0	0	0	0	0	0	0	0	0	0	0	0	0	0	0	0	0	0	0	0	0	0	0	0	0	0	0	0	0	0	0	0	0	0
A0A669BY97	C-type lectin domain-containing protein		Oreochromis niloticus (Nile tilapia) (Tilapia nilotica)				1.0093	-1.2689	DWAWIGLYR	0	0	0	0	0	0	0	0	0	0	0	0	0	0	0	0	0	0	0	0	0	0	0	0	0	0	0	0	0	0	0	0	0	0	0	0	0	0	0	0
A0A669BYC8	WD repeat domain 81	wdr81	Oreochromis niloticus (Nile tilapia) (Tilapia nilotica)				0.98673	-0.58784	QELPRSSR	0	0	0	0	0	0	0	378.04	0	0	0	0	0	0	0	0	0	0	0	0	0	563.65	606.68	669.45	0	0	0	0	0	0	0	0	0	0	0	0	0	0	0	0
A0A669BYG1	Serine hydroxymethyltransferase (EC 2.1.2.1)	SHMT2	Oreochromis niloticus (Nile tilapia) (Tilapia nilotica)	glycine biosynthetic process from serine [GO:0019264]; tetrahydrofolate interconversion [GO:0035999]		glycine hydroxymethyltransferase activity [GO:0004372]; pyridoxal phosphate binding [GO:0030170]	0.99389	-0.33863	SVDKKGR	0	0	0	0	2622.8	0	0	0	0	0	0	0	0	0	0	0	0	0	0	0	0	0	0	0	0	1835.9	0	0	0	0	0	0	0	0	0	0	0	0	0	0
A0A669BYJ4	Succinate dehydrogenase assembly factor 3 (SDH assembly factor 3) (SDHAF3)		Oreochromis niloticus (Nile tilapia) (Tilapia nilotica)	mitochondrial respiratory chain complex II assembly [GO:0034553]	mitochondrial matrix [GO:0005759]		1.0038	-1.4662	QSTSLLTK	0	0	0	0	0	0	0	0	0	0	0	0	0	0	0	0	0	0	0	0	0	0	0	0	0	0	0	0	0	0	0	0	0	0	0	0	0	0	0	0
A0A669BYM8	5'-AMP-activated protein kinase subunit beta-1	LOC100704877	Oreochromis niloticus (Nile tilapia) (Tilapia nilotica)		cytoplasm [GO:0005737]		1.005	-1.4662	MGNSSSDR	0	0	0	0	0	0	0	0	0	0	0	0	0	0	0	0	0	0	0	0	0	0	0	0	0	0	0	0	0	0	0	0	0	0	0	0	0	0	0	0
A0A669BZ41	Huntingtin-interacting protein 1-related protein	LOC100690950	Oreochromis niloticus (Nile tilapia) (Tilapia nilotica)	endocytosis [GO:0006897]	cytoplasm [GO:0005737]	actin binding [GO:0003779]; clathrin binding [GO:0030276]; phospholipid binding [GO:0005543]	1	-0.94114	VILLIILVLSWNK	0	0	0	0	0	0	0	0	0	0	0	0	0	0	0	0	0	0	0	0	0	0	0	0	0	0	0	0	0	0	0	0	0	0	0	0	0	0	0	0
A0A669BZ43	Myopalladin	mypn	Oreochromis niloticus (Nile tilapia) (Tilapia nilotica)		membrane [GO:0016020]		1.0051	-1.0956	EPPPVLAKPK	0	0	0	0	0	0	0	0	0	0	0	0	0	0	0	0	0	0	0	0	0	0	0	0	0	0	0	0	0	1378.3	0	0	1583.3	0	0	0	0	0	0	0
A0A669BZ61	CWF19 like cell cycle control factor 2		Oreochromis niloticus (Nile tilapia) (Tilapia nilotica)				0.9998	-2.5211	AKQQYDK	0	0	0	0	0	0	0	0	0	0	0	0	0	0	0	0	0	0	0	0	0	0	0	0	0	0	0	0	0	0	0	0	0	0	0	0	0	0	2709	0
A0A669BZ84	Reverse transcriptase domain-containing protein		Oreochromis niloticus (Nile tilapia) (Tilapia nilotica)				0.9965	-5.8223	QQYVQINEYKSNLMHIASKGSVLGPK	0	0	0	0	0	0	0	0	0	0	0	0	0	0	0	0	0	0	0	0	0	0	0	0	0	0	0	0	0	0	0	0	0	0	0	0	0	0	0	0
A0A669BZD2	YqaJ viral recombinase domain-containing protein		Oreochromis niloticus (Nile tilapia) (Tilapia nilotica)	DNA repair [GO:0006281]			1.0023	-2.1255	EVFLPHILSQL	0	0	0	0	0	0	0	0	0	0	0	0	0	0	0	0	0	0	0	0	0	0	0	0	0	0	0	0	0	0	0	0	0	0	0	0	0	0	0	0
A0A669BZI3	Citrate synthase	cs	Oreochromis niloticus (Nile tilapia) (Tilapia nilotica)	citrate metabolic process [GO:0006101]; tricarboxylic acid cycle [GO:0006099]	mitochondrial matrix [GO:0005759]	citrate (Si)-synthase activity [GO:0004108]	0.99022	-0.71111	DVLSDLIPKEQTR	0	0	0	0	0	0	0	0	0	0	0	0	0	0	0	0	0	0	947.86	0	0	0	0	0	0	0	0	0	0	0	0	0	0	0	0	0	0	0	0	0
A0A669BZL9	SUMO specific peptidase 2		Oreochromis niloticus (Nile tilapia) (Tilapia nilotica)	proteolysis [GO:0006508]		cysteine-type peptidase activity [GO:0008234]	1.0007	-1.0301	VLSAAFKLR	0	0	0	0	0	0	0	0	0	0	0	0	0	0	0	0	0	0	0	0	0	0	0	0	0	0	0	0	0	0	0	0	0	0	0	0	0	0	0	0
A0A669BZY7	Growth factor receptor-bound protein 10a		Oreochromis niloticus (Nile tilapia) (Tilapia nilotica)	signal transduction [GO:0007165]	cytoplasm [GO:0005737]		1.0125	-1.1524	DVCQLLVYK	0	0	0	0	0	0	0	0	0	0	0	0	0	0	0	0	0	0	0	0	0	0	0	0	0	0	0	0	0	0	0	0	0	0	0	0	0	0	0	0
A0A669C025	Metabotropic glutamate receptor 4	LOC100701884	Oreochromis niloticus (Nile tilapia) (Tilapia nilotica)		plasma membrane [GO:0005886]	G protein-coupled receptor activity [GO:0004930]	1.004	-0.97072	ACGELKK	0	0	0	0	0	0	0	0	0	0	0	0	0	0	0	0	0	0	0	0	0	682.67	0	0	0	0	0	0	0	0	0	0	0	0	0	0	0	0	0	1028.9
A0A669C079	Dihydropyrimidine dehydrogenase [NADP(+)] (DHPDHase) (DPD) (EC 1.3.1.2) (Dihydrothymine dehydrogenase) (Dihydrouracil dehydrogenase)	dpyd	Oreochromis niloticus (Nile tilapia) (Tilapia nilotica)	beta-alanine biosynthetic process [GO:0019483]	cytoplasm [GO:0005737]	4 iron, 4 sulfur cluster binding [GO:0051539]; dihydropyrimidine dehydrogenase (NADP+) activity [GO:0017113]; nucleotide binding [GO:0000166]	0.98524	-0.4879	GKPAPRLESLVGK	0	0	0	0	0	0	0	0	0	0	0	0	0	0	0	0	0	0	0	0	0	0	0	0	0	0	0	0	0	0	0	0	0	0	0	0	0	0	0	0
A0A669C094	Receptor associated protein of the synapse	rapsn	Oreochromis niloticus (Nile tilapia) (Tilapia nilotica)	chemical synaptic transmission [GO:0007268]	cytoplasm [GO:0005737]; synapse [GO:0045202]	acetylcholine receptor binding [GO:0033130]; metal ion binding [GO:0046872]; protein-membrane adaptor activity [GO:0043495]	0.99105	-0.80514	LGQAHVHLGVAK	0	0	0	0	0	0	0	0	0	0	0	0	0	0	0	0	0	0	0	0	0	0	0	0	0	0	0	0	0	0	0	0	0	0	0	0	0	0	0	0
A0A669C0C1	F-box and WD repeat domain containing 12	fbxw12	Oreochromis niloticus (Nile tilapia) (Tilapia nilotica)				1.0121	-1.3439	VLTWKNDR	472.01	0	0	0	0	0	0	0	0	0	0	0	0	0	0	0	0	0	0	0	0	0	0	0	0	0	0	0	0	0	0	0	0	0	0	0	0	0	0	0
A0A669C0H9	Protein Shroom2	SHROOM2	Oreochromis niloticus (Nile tilapia) (Tilapia nilotica)		cytoplasm [GO:0005737]; microtubule [GO:0005874]	actin filament binding [GO:0051015]	0.98267	-0.44971	KEIQQKR	0	0	0	0	0	0	0	0	0	0	0	0	0	0	0	0	0	0	0	0	0	0	0	0	0	0	0	0	0	0	0	0	0	0	0	0	0	0	0	0
A0A669C0L6	Cytochrome c oxidase subunit 4	LOC100704650	Oreochromis niloticus (Nile tilapia) (Tilapia nilotica)	mitochondrial electron transport, cytochrome c to oxygen [GO:0006123]	mitochondrial respiratory chain complex IV [GO:0005751]		0.99548	-0.3069	DVLTDADKSLKQK	0	0	0	0	0	0	0	0	0	0	0	0	0	0	0	0	0	0	0	0	0	0	0	0	0	0	0	0	0	0	0	0	0	0	0	0	0	0	0	0
A0A669C0R9	Ubiquilin 4	UBQLN4	Oreochromis niloticus (Nile tilapia) (Tilapia nilotica)			DNA binding [GO:0003677]	1.01	-1.1741	LLGSQPS	0	0	0	0	0	0	0	0	0	0	0	0	0	0	0	0	0	0	0	0	0	0	0	0	0	0	0	0	0	0	0	0	0	0	0	0	0	0	0	0
A0A669C0Y1	MutS homolog 3 (E. coli)		Oreochromis niloticus (Nile tilapia) (Tilapia nilotica)	mismatch repair [GO:0006298]		ATP binding [GO:0005524]; ATP-dependent DNA damage sensor activity [GO:0140664]; mismatched DNA binding [GO:0030983]	0.98597	-0.17093	AGSLCSSTLEKLK	0	0	0	0	0	0	0	0	0	0	0	0	0	0	0	0	0	0	0	0	0	0	0	0	0	0	0	0	0	0	0	0	0	0	0	0	0	0	0	0
A0A669C0Z4	Protein phosphatase 6, regulatory subunit 3		Oreochromis niloticus (Nile tilapia) (Tilapia nilotica)	regulation of phosphoprotein phosphatase activity [GO:0043666]		protein phosphatase binding [GO:0019903]	1.0042	-1.3709	HIGTSAIMDLLLR	0	0	0	0	0	0	0	0	0	0	0	0	805.49	0	0	0	0	0	0	0	0	0	0	0	0	0	0	0	0	0	0	1009.2	0	954.79	0	0	0	0	0	0
A0A669C101	Squalene monooxygenase (EC 1.14.14.17)		Oreochromis niloticus (Nile tilapia) (Tilapia nilotica)	sterol biosynthetic process [GO:0016126]	endoplasmic reticulum membrane [GO:0005789]	flavin adenine dinucleotide binding [GO:0050660]; squalene monooxygenase activity [GO:0004506]	0.98865	-0.76167	FIMGLRR	0	0	0	0	0	0	0	0	0	0	0	0	0	0	0	0	0	0	0	0	0	0	1497.9	0	0	0	0	0	0	0	0	0	0	0	0	0	0	0	0	0
A0A669C130	ATP-binding cassette, sub-family A (ABC1), member 12		Oreochromis niloticus (Nile tilapia) (Tilapia nilotica)		membrane [GO:0016020]	ABC-type transporter activity [GO:0140359]; ATP binding [GO:0005524]; ATP hydrolysis activity [GO:0016887]	1.002	-1.4538	LQLNYHR	0	0	0	0	0	0	0	0	0	0	0	0	0	0	0	0	0	0	0	0	0	0	0	0	0	0	0	0	0	0	0	0	0	0	0	0	699.33	0	0	0
A0A669C191	Signal peptide, CUB domain and EGF like domain containing 2	scube2	Oreochromis niloticus (Nile tilapia) (Tilapia nilotica)	animal organ development [GO:0048513]	extracellular region [GO:0005576]	calcium ion binding [GO:0005509]	0.99741	-0.3069	IKTTATFKSGTAK	0	0	0	0	0	0	0	0	0	0	0	0	0	0	0	0	0	0	0	0	0	0	0	0	0	0	0	0	0	0	0	0	0	0	0	0	0	0	0	0
A0A669C1D4	Nicotinamide-nucleotide adenylyltransferase (EC 2.7.7.1) (EC 2.7.7.18)	nmnat1	Oreochromis niloticus (Nile tilapia) (Tilapia nilotica)	NAD biosynthetic process [GO:0009435]		ATP binding [GO:0005524]; nicotinamide-nucleotide adenylyltransferase activity [GO:0000309]; nicotinate-nucleotide adenylyltransferase activity [GO:0004515]	1.0073	-0.91394	NADVVLAPLQR	0	0	0	0	0	0	0	0	0	0	0	0	0	0	0	0	0	0	0	0	0	0	0	0	0	0	0	0	0	0	0	0	0	0	0	0	0	0	0	0
A0A669C1K9	B30.2/SPRY domain-containing protein		Oreochromis niloticus (Nile tilapia) (Tilapia nilotica)				1.0032	-1.3439	NELQKIHK	0	0	510.32	0	0	0	0	0	0	607.31	0	0	0	0	0	0	0	0	0	0	0	0	0	0	925.95	0	0	0	0	0	0	0	0	0	0	0	0	0	0	482.57
A0A669C1Q5	Protein MMS22-like (Methyl methanesulfonate-sensitivity protein 22-like)	mms22l	Oreochromis niloticus (Nile tilapia) (Tilapia nilotica)	chromatin organization [GO:0006325]; double-strand break repair via homologous recombination [GO:0000724]; replication fork processing [GO:0031297]	chromosome [GO:0005694]; nucleus [GO:0005634]		1.0111	-1.1629	IYSKFSPKK	0	0	1171.5	0	0	0	1519	0	0	0	802.72	0	0	0	0	0	0	0	0	0	794.79	0	0	0	0	0	0	0	0	0	0	0	0	0	0	0	0	0	1233.5	0
A0A669C1S7	PTPRF interacting protein alpha 2		Oreochromis niloticus (Nile tilapia) (Tilapia nilotica)		cytoplasm [GO:0005737]		1.0045	-1.3439	VHTPRDGR	0	0	0	0	0	0	0	0	0	0	0	0	0	0	0	0	0	0	0	0	0	0	0	0	0	0	0	0	0	0	0	0	0	0	0	0	0	0	0	0
A0A669C1T2	Dysferlin, limb girdle muscular dystrophy 2B (autosomal recessive)		Oreochromis niloticus (Nile tilapia) (Tilapia nilotica)		cytoplasmic vesicle membrane [GO:0030659]; plasma membrane [GO:0005886]	metal ion binding [GO:0046872]	0.99901	-3.4469	FLGECRLALR	0	0	0	0	0	0	0	0	0	0	0	0	0	0	0	0	0	0	0	0	0	0	0	0	0	0	0	0	0	0	0	0	0	0	0	0	0	0	0	0
A0A669C221	Nucleoporin 205	nup205	Oreochromis niloticus (Nile tilapia) (Tilapia nilotica)		nuclear pore [GO:0005643]		1.0095	-1.2903	QVVLSKFVR	0	0	1743.7	0	787.02	0	0	0	0	0	0	0	0	0	0	0	0	0	0	0	0	0	0	0	0	0	0	0	0	0	0	0	0	0	0	0	0	0	0	0
A0A669C228	Regulator of G-protein signaling 14	LOC100694276	Oreochromis niloticus (Nile tilapia) (Tilapia nilotica)	signal transduction [GO:0007165]		GTPase activator activity [GO:0005096]	0.99712	-1.8116	KTPNSAK	0	0	0	0	0	0	0	0	0	0	0	0	0	0	0	0	0	0	0	0	0	0	0	0	0	0	0	0	0	0	0	0	0	0	0	0	0	0	0	0
A0A669C259	E3 ubiquitin protein ligase (EC 2.3.2.27)	rnf40	Oreochromis niloticus (Nile tilapia) (Tilapia nilotica)	chromatin organization [GO:0006325]; histone monoubiquitination [GO:0010390]	nucleus [GO:0005634]	metal ion binding [GO:0046872]; ubiquitin-protein transferase activity [GO:0004842]	0.98562	-0.63073	QRSDELKR	0	0	0	0	0	0	0	0	0	0	0	0	0	0	0	0	0	0	0	0	0	0	0	0	0	0	0	0	0	0	0	0	0	0	0	0	0	0	0	0
A0A669C272	Splicing factor 3a subunit 2	sf3a2	Oreochromis niloticus (Nile tilapia) (Tilapia nilotica)	mRNA processing [GO:0006397]; RNA splicing [GO:0008380]	spliceosomal complex [GO:0005681]	nucleic acid binding [GO:0003676]; zinc ion binding [GO:0008270]	1.0092	-1.3439	VPSREIDK	0	0	0	0	1100.4	0	0	0	0	0	0	0	0	0	0	0	0	0	0	0	0	0	0	0	0	0	3045.8	0	0	0	0	0	0	0	0	0	0	0	0	0
A0A669C2E1	RP1 like 1	LOC100710475	Oreochromis niloticus (Nile tilapia) (Tilapia nilotica)	intracellular signal transduction [GO:0035556]	cell projection [GO:0042995]; cytoplasm [GO:0005737]		1.0105	-1.1561	AGKAERPDSAR	0	0	0	0	0	0	0	0	0	0	0	0	0	0	0	0	0	0	0	0	4015.3	0	0	0	0	0	0	0	0	0	0	0	0	0	0	0	0	0	0	0
A0A669C2K7	ST3 beta-galactoside alpha-2,3-sialyltransferase 1	ST3GAL1	Oreochromis niloticus (Nile tilapia) (Tilapia nilotica)	protein glycosylation [GO:0006486]	Golgi apparatus [GO:0005794]; membrane [GO:0016020]	sialyltransferase activity [GO:0008373]	1.0069	-1.2354	DQIPIQEYQGAK	0	0	0	0	0	0	0	0	0	0	0	0	0	0	0	1251.2	0	0	0	0	0	0	0	0	1195.2	0	0	0	0	0	0	0	0	0	0	0	0	0	0	0
A0A669C2N7	ATP-binding cassette, sub-family C (CFTR/MRP), member 4		Oreochromis niloticus (Nile tilapia) (Tilapia nilotica)		membrane [GO:0016020]	ABC-type transporter activity [GO:0140359]; ATP binding [GO:0005524]; ATP hydrolysis activity [GO:0016887]	1.005	-1.4662	SDFSELCK	0	0	0	0	0	0	0	0	0	0	0	0	0	0	0	0	0	0	0	0	0	0	0	0	0	0	0	0	0	0	0	0	0	0	0	0	0	0	0	0
A0A669C2S6	MACPF domain-containing protein		Oreochromis niloticus (Nile tilapia) (Tilapia nilotica)	killing of cells of another organism [GO:0031640]	extracellular region [GO:0005576]		1.0124	-1.1741	SQLSGNR	1556.9	0	0	0	1667.6	0	0	0	0	0	0	0	1371.8	0	0	0	0	0	0	1545.4	0	0	0	0	0	0	0	0	0	0	0	1208.4	1268.1	0	0	0	0	0	0	0
A0A669C304	SLIT-ROBO Rho GTPase activating protein 1b		Oreochromis niloticus (Nile tilapia) (Tilapia nilotica)	signal transduction [GO:0007165]			1.012	-1.1741	ATLVVMR	0	0	0	0	0	0	0	0	0	0	0	0	0	0	0	0	0	1110.6	0	0	0	0	0	0	0	0	0	0	0	0	0	0	0	0	0	0	0	0	0	0
A0A669C376	Myosin-7	LOC106098811	Oreochromis niloticus (Nile tilapia) (Tilapia nilotica)	system development [GO:0048731]	myosin complex [GO:0016459]	actin filament binding [GO:0051015]; ATP binding [GO:0005524]; cytoskeletal motor activity [GO:0003774]	0.98771	-0.17093	LEKEKSELR	0	0	0	0	0	0	0	0	0	0	0	0	0	0	0	0	0	0	0	0	0	0	0	0	0	0	0	0	0	0	0	0	0	0	0	0	0	0	0	0
A0A669C382	Potassium voltage-gated channel subfamily S member 2	LOC100703363	Oreochromis niloticus (Nile tilapia) (Tilapia nilotica)	protein homooligomerization [GO:0051260]; regulation of monoatomic ion transmembrane transport [GO:0034765]	voltage-gated potassium channel complex [GO:0008076]	voltage-gated potassium channel activity [GO:0005249]	1.0022	-0.94799	FSHFYRR	0	0	0	0	0	0	0	0	0	0	0	0	0	0	0	0	0	0	0	0	0	1097.8	0	0	0	0	0	0	0	0	0	0	0	0	0	0	0	0	0	0
A0A669C3A4	Erythrocyte membrane protein band 4.1 like 3		Oreochromis niloticus (Nile tilapia) (Tilapia nilotica)	cortical actin cytoskeleton organization [GO:0030866]	cytoskeleton [GO:0005856]	cytoskeletal protein binding [GO:0008092]	1.0025	-0.97329	YSGRTQIQSR	0	0	0	0	0	0	0	0	0	0	0	0	0	0	0	0	0	0	0	0	0	0	0	1757.8	0	0	0	0	0	0	0	0	0	0	0	0	0	0	0	0
A0A669C3X3	Histone-lysine N-methyltransferase ASH1L	LOC100707110	Oreochromis niloticus (Nile tilapia) (Tilapia nilotica)		nucleus [GO:0005634]	chromatin binding [GO:0003682]; DNA binding [GO:0003677]; histone H3 methyltransferase activity [GO:0140938]; metal ion binding [GO:0046872]	1.0126	-1.174	GPGRPRK	0	0	359.33	0	0	0	0	0	0	0	0	0	0	0	0	0	0	0	0	0	0	0	0	0	0	0	0	0	0	0	0	0	0	0	0	0	0	0	0	0
A0A669C425	GTPase IMAP family member 8-like	LOC100694918	Oreochromis niloticus (Nile tilapia) (Tilapia nilotica)			GTP binding [GO:0005525]	1.004	-1.3439	LLQTFRQR	0	0	0	0	0	0	0	0	0	0	0	0	0	0	0	0	0	0	0	0	0	0	0	0	0	0	0	0	0	0	0	0	0	0	0	0	0	0	0	0
A0A669C443	Uncharacterized LOC109204762	LOC109204762	Oreochromis niloticus (Nile tilapia) (Tilapia nilotica)		membrane [GO:0016020]		1.0109	-1.1524	EETGSHDVR	0	0	0	0	0	0	0	0	0	0	0	0	0	0	0	0	0	0	0	0	0	0	0	0	0	0	2055.6	0	0	0	0	0	0	0	0	0	0	0	0	0
A0A669C462	DnaJ heat shock protein family (Hsp40) member C14	dnajc14	Oreochromis niloticus (Nile tilapia) (Tilapia nilotica)		membrane [GO:0016020]		0.98207	-0.5058	VTDVPGMK	0	0	0	0	0	0	0	0	0	0	0	0	0	0	0	0	0	0	0	0	0	0	0	0	0	0	0	0	0	0	0	0	0	0	0	0	0	0	0	0
A0A669C498	DIS3-like exonuclease 2 (EC 3.1.13.-)	dis3l2	Oreochromis niloticus (Nile tilapia) (Tilapia nilotica)	cell cycle [GO:0007049]; cell division [GO:0051301]; miRNA catabolic process [GO:0010587]; nuclear-transcribed mRNA catabolic process, exonucleolytic, 3'-5' [GO:0034427]; polyuridylation-dependent mRNA catabolic process [GO:1990074]	P-body [GO:0000932]	3'-5'-RNA exonuclease activity [GO:0000175]; metal ion binding [GO:0046872]; RNA binding [GO:0003723]	1.004	-0.97329	NLPKHPEDEK	0	2424.2	0	0	0	0	0	1714.6	0	0	0	0	0	0	0	0	568.21	0	0	1822.3	0	0	0	0	0	0	0	2970.3	2769.9	3218.2	0	0	0	0	0	532.63	0	0	0	0
A0A669C4H8	Polypeptide N-acetylgalactosaminyltransferase (EC 2.4.1.-) (Protein-UDP acetylgalactosaminyltransferase)		Oreochromis niloticus (Nile tilapia) (Tilapia nilotica)	protein glycosylation [GO:0006486]	Golgi membrane [GO:0000139]	carbohydrate binding [GO:0030246]; polypeptide N-acetylgalactosaminyltransferase activity [GO:0004653]	0.99767	-0.13401	EKLKCKPFK	0	0	0	0	0	0	0	0	0	0	0	0	0	0	0	0	413.12	0	0	0	0	0	0	0	0	0	0	0	0	0	0	0	0	0	0	0	0	0	0	0
A0A669C4J3	Kynurenine 3-monooxygenase	kmo	Oreochromis niloticus (Nile tilapia) (Tilapia nilotica)			FAD binding [GO:0071949]; monooxygenase activity [GO:0004497]	1.01	-1.3133	HVGLEEK	0	0	0	0	0	0	0	0	0	0	0	0	0	0	0	0	0	0	0	0	0	0	0	0	0	0	0	0	0	0	0	0	0	0	0	0	0	0	0	0
A0A669C4L1	Parathyroid hormone/parathyroid hormone-related peptide receptor (PTH/PTHrP type I receptor) (Parathyroid hormone 1 receptor)	pth1r	Oreochromis niloticus (Nile tilapia) (Tilapia nilotica)	cell surface receptor signaling pathway [GO:0007166]	plasma membrane [GO:0005886]	parathyroid hormone receptor activity [GO:0004991]	0.99308	-0.31697	RTLALDFKR	0	0	0	0	0	0	0	0	0	0	0	0	0	0	0	0	0	0	0	0	1552.2	0	0	0	0	0	0	0	0	0	0	0	0	0	0	0	0	0	0	0
A0A669C4M4	Eukaryotic elongation factor 2 kinase	eef2k	Oreochromis niloticus (Nile tilapia) (Tilapia nilotica)	protein phosphorylation [GO:0006468]		ATP binding [GO:0005524]; calcium ion binding [GO:0005509]; calmodulin binding [GO:0005516]; elongation factor-2 kinase activity [GO:0004686]	1.0036	-1.4662	WTFYHSSR	0	0	0	0	0	0	0	0	0	0	0	0	0	0	0	0	0	0	0	0	0	0	0	0	550.12	0	0	0	0	0	0	0	0	0	700.03	0	0	0	0	0
A0A669C4Q2	Complement factor I	cfi	Oreochromis niloticus (Nile tilapia) (Tilapia nilotica)	proteolysis [GO:0006508]	extracellular space [GO:0005615]; membrane [GO:0016020]	scavenger receptor activity [GO:0005044]; serine-type endopeptidase activity [GO:0004252]	0.9809	-0.63073	KELLVCKK	0	0	0	0	0	0	0	0	0	0	0	0	0	0	0	0	0	0	0	0	0	0	0	0	0	0	0	0	0	0	0	0	0	0	0	0	0	0	0	0
A0A669C4T5	Protein arginine N-methyltransferase 8-B	LOC100700740	Oreochromis niloticus (Nile tilapia) (Tilapia nilotica)	peptidyl-arginine methylation [GO:0018216]		protein-arginine N-methyltransferase activity [GO:0016274]	1.0033	-1.4662	ILPSCPGR	0	0	0	0	0	0	0	0	0	0	0	0	0	0	0	0	0	0	0	0	0	0	0	0	0	0	0	0	0	0	0	0	0	1206.8	0	0	0	0	0	0
A0A669C4U4	Si:dkeyp-93d12.1		Oreochromis niloticus (Nile tilapia) (Tilapia nilotica)				0.98394	-0.62947	ENTKSLVGGR	0	0	0	0	0	0	0	0	0	0	0	0	0	0	0	0	0	0	0	0	0	2103.9	0	0	0	0	0	0	0	0	0	0	0	0	0	0	0	0	0	0
A0A669C503	Ras and EF-hand domain-containing protein	LOC100706208	Oreochromis niloticus (Nile tilapia) (Tilapia nilotica)			calcium ion binding [GO:0005509]; GTP binding [GO:0005525]; GTPase activity [GO:0003924]	1.0123	-1.1741	SYFTQSK	0	0	0	0	0	0	0	0	0	0	0	0	0	0	0	0	0	0	0	0	0	0	568.5	0	0	0	0	0	0	0	0	0	0	0	0	0	0	0	0	0
A0A669C536	Neurexin 2	NRXN2	Oreochromis niloticus (Nile tilapia) (Tilapia nilotica)	anatomical structure development [GO:0048856]			1.0139	-0.27094	KVNDGEWCHVDFQREGR	0	0	0	0	0	574.98	0	0	0	0	0	0	0	0	0	0	0	0	0	0	0	0	0	0	0	0	0	0	0	0	0	0	0	0	0	0	0	0	0	0
A0A669C540	Centrosomal protein 295	cep295	Oreochromis niloticus (Nile tilapia) (Tilapia nilotica)				1.0035	-1.4002	LYEQLEEVK	0	0	0	0	0	0	0	0	0	0	0	0	0	463.97	0	0	0	0	0	0	0	0	3262.2	0	0	0	0	0	0	0	0	0	0	0	0	0	0	0	0	0
A0A669C5A4	Rab11 family-interacting protein 1	LOC100702832	Oreochromis niloticus (Nile tilapia) (Tilapia nilotica)	protein transport [GO:0015031]	endosome [GO:0005768]; membrane [GO:0016020]	small GTPase binding [GO:0031267]	0.99407	-0.33863	KNSQKGK	0	0	0	0	0	0	0	0	0	0	0	0	0	0	0	0	0	0	0	0	0	0	0	0	0	0	0	0	0	967.73	0	0	0	0	0	0	0	0	0	0
A0A669C5K2	Potassium voltage-gated channel subfamily B member 2	LOC100711787	Oreochromis niloticus (Nile tilapia) (Tilapia nilotica)	protein homooligomerization [GO:0051260]; regulation of monoatomic ion transmembrane transport [GO:0034765]	dendrite [GO:0030425]; perikaryon [GO:0043204]; voltage-gated potassium channel complex [GO:0008076]	voltage-gated potassium channel activity [GO:0005249]	1.0021	-2.0161	ALKLDFIASK	0	0	0	0	0	0	0	0	0	0	0	0	0	0	0	0	0	0	0	0	0	0	0	0	0	0	0	0	0	0	0	0	0	0	0	0	0	0	0	0
A0A669C5S9	Bassoon (presynaptic cytomatrix protein) b		Oreochromis niloticus (Nile tilapia) (Tilapia nilotica)				1.012	-1.1741	LPQLTPR	0	0	0	0	0	0	0	0	0	0	0	0	0	0	0	0	0	0	0	0	0	0	0	0	0	0	0	0	0	0	0	0	0	0	0	0	0	0	0	0
A0A669C5Y3	chitin synthase (EC 2.4.1.16)	LOC102076176	Oreochromis niloticus (Nile tilapia) (Tilapia nilotica)		membrane [GO:0016020]	chitin synthase activity [GO:0004100]	1.0036	-0.85047	ELKSLRNK	0	0	0	2748.8	2750.2	0	0	0	0	2750.7	0	0	0	0	0	0	0	2106.3	0	0	0	0	0	0	4753.5	0	0	1901.2	1798.8	0	0	2462.7	2541.5	2651	0	0	0	0	0	2789.6
A0A669C605	Nucleolar complex protein 2 homolog	noc2l	Oreochromis niloticus (Nile tilapia) (Tilapia nilotica)		nucleus [GO:0005634]		0.98958	-0.76368	KPINFAVILK	0	0	0	0	0	0	0	0	0	0	0	0	0	0	0	0	0	0	0	0	0	0	0	0	0	0	0	0	0	0	0	0	0	0	0	0	0	0	0	0
A0A669C630	NACHT, LRR and PYD domains-containing protein 3	LOC100710998	Oreochromis niloticus (Nile tilapia) (Tilapia nilotica)				0.99259	-0.33732	LLKEPHLRLDTLR	0	0	0	0	0	0	0	0	0	0	0	0	0	0	0	0	0	0	0	0	0	0	0	0	0	0	0	0	0	0	0	0	0	0	0	0	0	0	0	0
A0A669C6C1	Nuclear VCP like	nvl	Oreochromis niloticus (Nile tilapia) (Tilapia nilotica)		membrane [GO:0016020]	ATP binding [GO:0005524]; ATP hydrolysis activity [GO:0016887]	0.9877	-0.17093	SQRHTHSSAADIR	0	0	0	0	0	0	0	0	0	0	0	0	0	0	0	0	0	0	0	0	0	5922.7	0	0	0	0	0	0	0	0	0	0	0	0	0	0	0	0	0	0
A0A669C6D2	Splicing factor, arginine/serine-rich 19	LOC100703757	Oreochromis niloticus (Nile tilapia) (Tilapia nilotica)				0.99594	-0.63073	ILKRNTMR	0	0	0	0	0	0	0	0	0	0	0	0	0	0	0	0	0	0	0	0	0	0	0	0	0	0	0	0	0	0	0	0	0	0	0	0	0	0	0	0
A0A669C6K6	Heterogeneous nuclear ribonucleoprotein Q	LOC100696647	Oreochromis niloticus (Nile tilapia) (Tilapia nilotica)			RNA binding [GO:0003723]	1.0016	-2.3767	LFVGSIPKSK	0	0	0	0	0	0	0	0	0	0	0	0	0	0	0	0	0	0	0	0	0	0	0	0	0	0	0	0	0	0	0	1619	0	0	0	0	0	0	0	0
A0A669C763	Ig-like domain-containing protein		Oreochromis niloticus (Nile tilapia) (Tilapia nilotica)				0.99897	-1.0301	VKYAPVNVK	0	0	0	0	0	0	0	0	0	0	0	0	0	0	0	0	0	0	0	0	0	0	0	0	0	0	0	0	0	0	0	0	0	0	0	0	0	0	0	0
A0A669C779	DEAH (Asp-Glu-Ala-His) box polypeptide 34		Oreochromis niloticus (Nile tilapia) (Tilapia nilotica)			ATP binding [GO:0005524]; helicase activity [GO:0004386]	0.99864	-1.0518	QFKDLLR	0	0	0	0	0	0	0	0	0	0	0	0	0	0	0	0	0	0	0	0	0	0	0	0	0	0	0	0	0	0	0	0	0	0	0	0	0	0	0	0
A0A669C788	Staufen double-stranded RNA binding protein 1	stau1	Oreochromis niloticus (Nile tilapia) (Tilapia nilotica)			RNA binding [GO:0003723]	1.003	-2.0341	EKEPEYSMVTER	0	0	0	0	0	0	0	0	0	0	0	0	0	0	0	0	0	0	0	0	0	0	0	0	0	0	0	0	0	0	0	0	0	0	0	0	0	0	0	0
A0A669C794	Kinesin family member 21A	KIF21A	Oreochromis niloticus (Nile tilapia) (Tilapia nilotica)	microtubule-based movement [GO:0007018]; system development [GO:0048731]		ATP binding [GO:0005524]; microtubule binding [GO:0008017]; microtubule motor activity [GO:0003777]	1.0092	-1.2892	SPTGAER	0	0	0	0	0	0	0	0	0	0	0	0	0	0	0	0	0	0	0	0	0	0	0	0	0	0	0	0	0	0	0	0	0	0	0	0	0	0	0	0
A0A669C7A4	Gastric inhibitory polypeptide (Glucose-dependent insulinotropic polypeptide)		Oreochromis niloticus (Nile tilapia) (Tilapia nilotica)	regulation of fatty acid biosynthetic process [GO:0042304]; regulation of insulin secretion [GO:0050796]; response to glucose [GO:0009749]	extracellular region [GO:0005576]	hormone activity [GO:0005179]	1.004	-0.97329	NFIKFLLSQR	0	0	0	0	0	0	0	0	0	0	0	0	0	0	0	0	436.71	370.95	0	0	0	0	0	0	0	0	0	0	0	0	0	0	0	0	0	0	0	0	0	0
A0A669C7C9	KIAA0100 ortholog	kiaa0100	Oreochromis niloticus (Nile tilapia) (Tilapia nilotica)				1.01	-1.3006	GLCLRVELGCTR	0	0	0	0	0	0	0	0	0	0	0	0	0	0	0	0	0	0	0	0	0	0	0	0	0	0	0	0	0	0	0	0	0	0	0	0	0	0	0	0
A0A669C7G5	Tyrosine-protein phosphatase (EC 3.1.3.48)	ptpn4	Oreochromis niloticus (Nile tilapia) (Tilapia nilotica)	protein dephosphorylation [GO:0006470]	cytoplasm [GO:0005737]; cytoskeleton [GO:0005856]	cytoskeletal protein binding [GO:0008092]; protein tyrosine phosphatase activity [GO:0004725]	1.004	-1.3439	TNKSTVAL	0	0	1201.2	0	1390.4	1449.5	0	0	1681.2	978.31	0	0	0	0	0	0	0	0	0	0	0	0	0	0	0	0	0	0	0	0	825.18	753.73	0	0	0	0	0	0	0	880.64
A0A669C7N8	Disintegrin and metalloproteinase domain-containing protein 12	LOC100703495	Oreochromis niloticus (Nile tilapia) (Tilapia nilotica)	anatomical structure development [GO:0048856]; proteolysis [GO:0006508]	membrane [GO:0016020]	metal ion binding [GO:0046872]; metalloendopeptidase activity [GO:0004222]	0.98909	-0.77812	LVEIANYVDK	921.45	0	0	1082.4	0	0	0	0	0	1170.9	0	1132	0	0	0	910.3	0	777.94	0	0	0	0	969.87	0	738.74	0	779.28	982.65	0	1022.5	0	897.37	968.31	945.48	949.1	1018.7	0	0	0	761.18
A0A669C7W2	Transferrin receptor protein 1	LOC100702695	Oreochromis niloticus (Nile tilapia) (Tilapia nilotica)		plasma membrane [GO:0005886]		0.99881	-3.3672	AASNLYNDIANTNLDDK	0	0	0	0	0	0	0	0	0	0	0	0	0	0	0	0	0	0	0	0	0	0	0	1126.1	0	0	0	0	0	0	0	0	0	0	0	0	0	0	0	0
A0A669C7Y1	FosB proto-oncogene, AP-1 transcription factor subunit	fosb	Oreochromis niloticus (Nile tilapia) (Tilapia nilotica)	regulation of transcription by RNA polymerase II [GO:0006357]	nucleus [GO:0005634]	DNA binding [GO:0003677]; DNA-binding transcription factor activity [GO:0003700]	0.99898	-1.0518	LAAAKCR	0	0	0	0	0	0	0	0	0	0	0	0	0	0	0	0	0	0	0	0	0	0	0	0	0	0	0	0	0	0	0	0	0	0	0	0	0	800.66	0	0
A0A669C7Y6	Protein MON2 homolog		Oreochromis niloticus (Nile tilapia) (Tilapia nilotica)	protein transport [GO:0015031]			1.0043	-1.4662	LAVSSLLK	0	0	0	0	0	0	0	0	0	0	0	0	0	0	0	0	0	0	0	0	0	0	0	0	0	0	0	0	0	0	0	0	0	0	0	0	0	0	0	0
A0A669C8A5	Gap junction protein	LOC100699698	Oreochromis niloticus (Nile tilapia) (Tilapia nilotica)	cell communication [GO:0007154]	connexin complex [GO:0005922]		1.0088	-0.19527	VPKYTNEKGK	0	0	0	0	0	0	0	0	0	0	0	0	0	0	0	0	0	0	0	0	0	0	0	0	0	0	0	0	0	0	0	0	0	0	0	0	0	0	0	0
A0A669C8F4	Axin-1	LOC100697931	Oreochromis niloticus (Nile tilapia) (Tilapia nilotica)	negative regulation of canonical Wnt signaling pathway [GO:0090090]; Wnt signaling pathway [GO:0016055]	cytoplasm [GO:0005737]		0.99267	-0.33863	LEERLKR	0	0	0	0	0	0	0	0	0	0	0	0	0	0	0	0	0	0	0	0	0	0	0	0	0	0	0	0	0	0	0	3016.5	0	0	0	0	0	0	0	0
A0A669C8G0	Protein phosphatase, Mg2+/Mn2+ dependent 1G	ppm1g	Oreochromis niloticus (Nile tilapia) (Tilapia nilotica)	protein dephosphorylation [GO:0006470]		metal ion binding [GO:0046872]; protein serine/threonine phosphatase activity [GO:0004722]	0.99705	-4.0876	QSSGSPESTLTDDETTR	0	0	0	0	0	0	0	0	0	0	0	0	0	0	0	1038.4	0	0	0	0	0	0	0	0	0	0	0	0	0	0	0	0	0	0	0	0	0	0	0	0
A0A669C8G6	Acyl-CoA thioesterase 21		Oreochromis niloticus (Nile tilapia) (Tilapia nilotica)	acyl-CoA metabolic process [GO:0006637]	cytoplasm [GO:0005737]	thiolester hydrolase activity [GO:0016790]	1.0036	-0.97329	NKALNPHVVK	0	0	0	0	0	0	0	0	0	0	0	0	0	0	0	0	0	0	0	0	0	0	0	0	0	0	0	0	0	0	1379.7	0	0	0	0	0	0	0	0	0
A0A669C8U7	Zinc finger protein 507	znf507	Oreochromis niloticus (Nile tilapia) (Tilapia nilotica)				0.99674	-0.30409	AINEAISQSSRAPQK	0	0	0	0	0	114110	0	0	0	0	0	0	0	0	0	0	0	0	0	0	0	0	0	0	0	0	0	0	0	0	0	0	0	0	0	0	0	0	0	0
A0A669C8U8	Uncharacterized LOC102076942	LOC102076942	Oreochromis niloticus (Nile tilapia) (Tilapia nilotica)				1.0041	-1.4662	QRPGATNR	0	0	0	0	0	0	0	0	0	0	0	0	0	0	0	0	0	0	0	0	0	0	0	0	0	0	0	0	637.58	0	0	0	0	0	0	0	0	0	0	884.31
A0A669C8Z6	Protein Wnt		Oreochromis niloticus (Nile tilapia) (Tilapia nilotica)	animal organ development [GO:0048513]; Wnt signaling pathway [GO:0016055]	extracellular region [GO:0005576]	signaling receptor binding [GO:0005102]	0.99865	-1.0518	NGKLGGR	0	0	0	0	0	0	0	0	0	0	0	0	0	0	0	0	0	0	0	0	0	0	0	0	0	0	0	0	0	0	0	0	0	0	1229.3	0	0	0	0	0
A0A669C958	Coiled-coil domain containing 106a		Oreochromis niloticus (Nile tilapia) (Tilapia nilotica)				1.0051	-0.95668	RVFRPPR	0	0	0	0	0	0	0	0	0	0	0	0	0	0	0	0	0	0	0	0	0	0	0	0	0	0	0	0	0	0	0	0	0	0	0	0	0	0	0	0
A0A669C996	Valine--tRNA ligase (EC 6.1.1.9) (Valyl-tRNA synthetase)		Oreochromis niloticus (Nile tilapia) (Tilapia nilotica)	valyl-tRNA aminoacylation [GO:0006438]		aminoacyl-tRNA editing activity [GO:0002161]; ATP binding [GO:0005524]; valine-tRNA ligase activity [GO:0004832]	1.0016	-2.3866	DAHGRKMSK	3372.5	3959.4	3820.5	2129.9	0	2169.2	7032.7	0	0	0	0	2345.4	581.28	1646.7	1601.2	2342	1636.5	2222	1718.1	1649.2	1850.8	0	704.63	712.35	983.13	975.63	965.88	0	2991.6	2778.2	1190.2	1812.1	1953.7	1686.1	0	0	1390	2361.5	1598.1	1205.3
A0A669C9B3	Palmitoyltransferase (EC 2.3.1.225)		Oreochromis niloticus (Nile tilapia) (Tilapia nilotica)		membrane [GO:0016020]	protein-cysteine S-palmitoyltransferase activity [GO:0019706]	1.0092	-1.3439	AEKELYER	0	0	0	0	0	0	0	0	0	0	0	0	0	0	0	0	0	0	0	0	0	0	0	0	0	0	0	0	0	2979.9	0	0	0	0	0	0	0	0	0	0
A0A669C9C5	PiggyBac transposable element-derived protein domain-containing protein		Oreochromis niloticus (Nile tilapia) (Tilapia nilotica)				0.079365	0.11333	RLSAAQALQLILEER	0	0	0	0	0	0	0	0	0	0	0	0	0	0	0	0	0	0	0	0	0	0	0	0	0	0	0	0	0	0	0	0	0	0	0	0	0	0	0	0
A0A669C9L1	ATP-binding cassette, sub-family B (MDR/TAP), member 7		Oreochromis niloticus (Nile tilapia) (Tilapia nilotica)		membrane [GO:0016020]	ABC-type transporter activity [GO:0140359]; ATP binding [GO:0005524]; ATP hydrolysis activity [GO:0016887]	1.0008	-2.3073	ACAAFFNELR	0	0	23687	0	0	0	0	0	0	0	0	0	0	0	0	0	0	0	0	0	0	0	0	0	0	0	0	0	29050	0	0	0	0	0	0	0	0	0	0	0
A0A669C9L4	C-C motif chemokine 20	LOC100702962	Oreochromis niloticus (Nile tilapia) (Tilapia nilotica)	immune response [GO:0006955]	extracellular space [GO:0005615]	chemokine activity [GO:0008009]	0.99156	-0.33863	TNNNKKS	0	0	0	0	0	0	0	0	0	0	0	0	0	0	0	0	0	0	0	0	0	0	0	0	0	0	0	0	0	0	0	0	0	0	0	0	0	0	0	0
A0A669C9Q8	Calcium dependent secretion activator	cadps	Oreochromis niloticus (Nile tilapia) (Tilapia nilotica)	dense core granule exocytosis [GO:1990504]; protein transport [GO:0015031]; synaptic vesicle exocytosis [GO:0016079]	cytoplasmic vesicle [GO:0031410]; presynapse [GO:0098793]		0.98678	-0.59014	FVAILEGVLAKISR	0	0	0	0	0	0	0	0	0	0	0	0	0	0	0	0	0	0	0	2042.9	0	0	0	0	0	0	0	0	0	431.16	0	0	0	0	0	0	0	0	0	0
A0A669C9W0	Ig-like domain-containing protein		Oreochromis niloticus (Nile tilapia) (Tilapia nilotica)				1.0109	-1.1741	NSAQAAR	0	0	0	0	0	0	0	0	0	0	0	0	0	0	0	0	0	0	0	0	0	0	0	0	0	0	0	0	0	0	0	0	0	0	0	0	0	0	0	0
A0A669C9W2	Plexin B3		Oreochromis niloticus (Nile tilapia) (Tilapia nilotica)	axon guidance [GO:0007411]	plasma membrane [GO:0005886]	semaphorin receptor activity [GO:0017154]	1.0084	-1.2745	VLDTDTITQVKDK	0	0	0	0	0	0	0	0	0	0	0	0	0	0	0	0	0	0	0	0	0	0	0	0	0	0	0	0	0	0	0	0	0	0	0	0	0	0	0	0
A0A669CAD2	Paired box protein Pax-6	LOC100705868	Oreochromis niloticus (Nile tilapia) (Tilapia nilotica)	regulation of DNA-templated transcription [GO:0006355]	nucleus [GO:0005634]	DNA binding [GO:0003677]	1.0044	-0.9709	VATPEVVGK	0	0	0	0	0	0	0	0	0	0	0	0	0	0	0	1389.8	0	0	0	0	0	0	0	0	0	0	0	0	0	0	0	0	0	0	0	0	0	0	0	0
A0A669CAE0	Pre-mRNA processing factor 40 homolog A	prpf40a	Oreochromis niloticus (Nile tilapia) (Tilapia nilotica)	mRNA cis splicing, via spliceosome [GO:0045292]	nucleus [GO:0005634]		1.0095	-1.3439	ESRWTKPK	0	0	0	0	0	0	0	0	0	0	0	0	0	0	0	0	0	0	0	0	0	0	0	0	0	0	0	0	0	0	0	0	0	0	0	0	0	0	0	0
A0A669CAJ1	Calpain 7	capn7	Oreochromis niloticus (Nile tilapia) (Tilapia nilotica)	proteolysis [GO:0006508]		calcium-dependent cysteine-type endopeptidase activity [GO:0004198]	0.99727	-5.1845	INSPHYLTK	0	0	0	0	0	0	679.4	0	0	0	0	0	0	0	0	0	0	0	0	0	545.18	0	783.61	0	0	0	0	0	477.11	0	0	0	0	0	0	0	0	400.18	0	0
A0A669CAL0	DnaJ (Hsp40) homolog, subfamily C, member 3b		Oreochromis niloticus (Nile tilapia) (Tilapia nilotica)				0.99219	-0.33863	QVKKLSK	0	0	0	0	0	0	0	0	0	0	0	0	0	0	0	0	0	0	0	0	0	0	0	0	0	0	0	0	0	0	0	0	0	0	0	0	0	0	0	0
A0A669CAM7	ELAV-like protein	LOC100710029	Oreochromis niloticus (Nile tilapia) (Tilapia nilotica)		cytoplasm [GO:0005737]; dendrite [GO:0030425]; growth cone [GO:0030426]; perikaryon [GO:0043204]; ribonucleoprotein complex [GO:1990904]	RNA binding [GO:0003723]	0.99612	-7.3134	SPLGSTETQWRQAELPQLQGWAEK	0	0	0	0	0	0	0	0	0	0	0	0	0	0	0	0	0	0	0	0	0	595.62	0	0	0	0	0	0	0	0	0	0	0	0	0	0	0	0	0	0
A0A669CAV2	Serine/threonine-protein kinase LMTK1	LOC100712205	Oreochromis niloticus (Nile tilapia) (Tilapia nilotica)	protein phosphorylation [GO:0006468]		ATP binding [GO:0005524]; protein kinase activity [GO:0004672]	1.0064	-1.5584	NVTGGYYDMMGSLRK	0	0	0	0	0	0	0	3343.3	0	0	0	0	0	0	0	0	0	0	0	0	0	0	0	0	0	0	795.35	0	0	0	0	0	0	0	0	0	0	0	0	0
A0A669CB01	Ankyrin repeat domain 33Bb		Oreochromis niloticus (Nile tilapia) (Tilapia nilotica)				1.0102	-0.2797	LAELKRLGPER	0	0	0	0	0	0	0	0	0	0	0	0	493.52	0	0	0	0	0	0	0	0	0	0	0	0	0	0	0	0	0	0	0	0	0	0	0	0	0	0	0
A0A669CB06	Niban apoptosis regulator 1	niban1	Oreochromis niloticus (Nile tilapia) (Tilapia nilotica)				0.99696	-1.0518	TNKLASR	0	0	0	0	0	0	0	0	0	0	0	0	0	0	0	0	0	0	0	0	0	0	0	0	0	0	0	0	0	0	0	0	0	0	0	0	0	0	0	0
A0A669CB60	RNA polymerase II associated protein 3	rpap3	Oreochromis niloticus (Nile tilapia) (Tilapia nilotica)				1.0128	-0.24539	RKDEELR	0	0	0	0	0	0	0	0	0	0	0	0	0	0	0	0	0	0	0	0	0	0	0	0	0	0	0	0	0	0	0	0	0	0	0	0	0	0	0	0
A0A669CB77	Succinate dehydrogenase complex flavoprotein subunit A	sdha	Oreochromis niloticus (Nile tilapia) (Tilapia nilotica)		mitochondrion [GO:0005739]	oxidoreductase activity [GO:0016491]	1.0097	-1.1741	SMTIEIR	0	0	0	0	0	0	0	0	0	0	0	0	0	0	0	0	0	0	0	0	0	0	0	0	0	0	0	0	0	0	0	0	0	0	0	0	0	0	0	0
A0A669CB82	Reverse transcriptase domain-containing protein		Oreochromis niloticus (Nile tilapia) (Tilapia nilotica)				0	0.25837	LCWKPHITYVRGK	0	1051.5	0	0	0	0	1293.2	0	1194.7	0	0	0	0	0	0	0	0	0	0	0	0	782.24	0	0	0	0	0	0	0	0	579.19	638.44	0	0	0	0	0	0	0	0
A0A669CBA4	RBR-type E3 ubiquitin transferase (EC 2.3.2.31)	RNF217	Oreochromis niloticus (Nile tilapia) (Tilapia nilotica)	protein ubiquitination [GO:0016567]		metal ion binding [GO:0046872]; ubiquitin-protein transferase activity [GO:0004842]	1.0022	-1.4662	LYVSSQVR	0	0	0	0	0	0	0	0	0	0	0	0	0	0	0	0	0	0	0	0	0	0	0	0	0	0	0	0	0	0	0	0	0	0	0	0	0	0	0	0
A0A669CBB3	Zinc finger protein 710	LOC100693413	Oreochromis niloticus (Nile tilapia) (Tilapia nilotica)				0.99453	-0.33863	GRTKRPR	0	0	0	0	0	0	0	0	0	0	0	0	0	0	0	0	0	0	0	0	0	0	0	121150	0	0	0	0	0	0	0	0	0	0	0	0	0	0	0	0
A0A669CBD6	Adhesion G-protein coupled receptor G1	LOC100705549	Oreochromis niloticus (Nile tilapia) (Tilapia nilotica)	cell surface receptor signaling pathway [GO:0007166]	membrane [GO:0016020]	G protein-coupled receptor activity [GO:0004930]	0.99861	-1.0301	IMTGIKQLK	0	0	0	0	0	0	2028	0	0	2196.2	0	0	0	0	0	0	0	0	0	0	0	0	0	0	0	0	0	0	0	0	0	0	0	0	0	0	0	0	0	0
A0A669CBG0	Reverse transcriptase domain-containing protein		Oreochromis niloticus (Nile tilapia) (Tilapia nilotica)				1.0095	-0.041005	MFCLACR	0	0	0	0	0	0	0	0	0	0	0	0	0	0	0	0	0	0	0	0	0	1581.7	1610.2	1387	0	0	0	0	0	0	0	0	0	0	0	0	0	0	0	0
A0A669CBK6	Leucine rich repeat containing 27	LRRC27	Oreochromis niloticus (Nile tilapia) (Tilapia nilotica)				1.0143	-1.1741	SQVSLQK	0	0	0	0	0	0	0	0	0	0	0	1729.8	0	0	0	0	0	0	0	0	0	0	0	0	0	0	0	0	0	0	0	0	0	0	0	0	0	0	0	0
A0A669CBR3	Myosin IHa		Oreochromis niloticus (Nile tilapia) (Tilapia nilotica)	system development [GO:0048731]	myosin complex [GO:0016459]	actin binding [GO:0003779]; ATP binding [GO:0005524]; cytoskeletal motor activity [GO:0003774]	0.99759	-1.0301	IKYCVPVIK	0	0	0	0	0	0	0	0	0	0	0	0	0	0	0	0	0	0	0	0	0	0	0	0	0	0	0	0	0	0	0	0	0	0	0	0	0	0	0	0
A0A669CBS5	Glia maturation factor gamma	LOC100711992	Oreochromis niloticus (Nile tilapia) (Tilapia nilotica)	actin filament debranching [GO:0071846]		actin binding [GO:0003779]; Arp2/3 complex binding [GO:0071933]	1.0075	-1.122	LVQTAELTK	0	0	0	0	0	0	0	0	0	0	0	0	0	0	0	0	0	0	0	0	0	0	0	0	0	0	0	0	0	0	0	0	0	0	0	0	0	0	0	0
A0A669CBX6	non-specific protein-tyrosine kinase (EC 2.7.10.2)	jak1	Oreochromis niloticus (Nile tilapia) (Tilapia nilotica)	intracellular signal transduction [GO:0035556]; protein phosphorylation [GO:0006468]	cytoskeleton [GO:0005856]; membrane [GO:0016020]	ATP binding [GO:0005524]; non-membrane spanning protein tyrosine kinase activity [GO:0004715]	1.0066	-1.1103	VVLKVLGSGHR	0	0	0	0	5552.9	0	0	0	0	0	0	0	0	0	0	0	0	0	0	0	0	0	0	0	0	0	0	0	0	0	0	0	0	0	0	0	0	0	0	0
A0A669CBY7	Transient receptor potential cation channel subfamily M member 4	LOC100703227	Oreochromis niloticus (Nile tilapia) (Tilapia nilotica)	monoatomic cation transmembrane transport [GO:0098655]	membrane [GO:0016020]	monoatomic ion channel activity [GO:0005216]	0.99735	-2.5797	EKIWIPK	0	0	0	0	0	0	0	0	0	0	0	0	0	0	0	0	0	0	0	0	0	0	0	0	0	0	0	0	0	0	0	0	0	0	0	0	0	0	0	0
A0A669CBZ0	Epiplakin 1	EPPK1	Oreochromis niloticus (Nile tilapia) (Tilapia nilotica)	intermediate filament cytoskeleton organization [GO:0045104]	cytoskeleton [GO:0005856]		1.0029	-1.0844	EGIVGSEMKEK	0	0	0	0	0	0	0	0	0	0	0	0	0	0	0	0	0	0	0	0	0	0	0	0	0	0	0	0	0	0	0	0	0	0	0	0	0	0	0	0
A0A669CC00	Uncharacterized protein		Oreochromis niloticus (Nile tilapia) (Tilapia nilotica)	DNA integration [GO:0015074]; proteolysis [GO:0006508]		aspartic-type endopeptidase activity [GO:0004190]; nucleic acid binding [GO:0003676]; RNA-directed DNA polymerase activity [GO:0003964]; zinc ion binding [GO:0008270]	1.0102	-1.2689	SPAELLFNR	0	0	0	0	0	0	0	0	0	0	0	0	0	0	0	0	0	0	0	0	0	0	0	0	0	0	0	0	0	0	1279.5	0	0	0	0	0	941.66	0	0	0
A0A669CC37	C2H2-type domain-containing protein		Oreochromis niloticus (Nile tilapia) (Tilapia nilotica)				0.54167	0.11326	QFSCDQCGKNFTQRCSLK	0	904.59	0	0	0	0	1115.2	0	0	0	0	0	0	0	0	0	0	0	0	0	0	0	0	0	0	0	0	0	0	0	0	0	0	0	0	0	0	0	0	0
A0A669CC77	Beta-1,4 N-acetylgalactosaminyltransferase	LOC100705425	Oreochromis niloticus (Nile tilapia) (Tilapia nilotica)	cellular nitrogen compound metabolic process [GO:0034641]; lipid glycosylation [GO:0030259]	Golgi membrane [GO:0000139]	hexosyltransferase activity [GO:0016758]	0.97234	-0.1448	TDVQKAYEKFR	0	0	0	0	0	0	0	0	0	0	0	0	0	0	0	0	0	0	0	0	0	2897.9	0	2714	0	0	0	0	0	0	0	0	0	0	0	0	0	0	0	0
A0A669CCC8	Septin	septin6	Oreochromis niloticus (Nile tilapia) (Tilapia nilotica)			GTP binding [GO:0005525]	0.99898	-1.0518	IGNKMVK	0	0	0	0	0	0	0	0	0	0	0	0	0	0	0	0	0	0	0	0	0	0	0	0	0	0	0	0	0	0	0	0	504.34	0	0	0	0	0	0	0
A0A669CCL9	phosphoinositide 5-phosphatase (EC 3.1.3.36)	LOC100708563	Oreochromis niloticus (Nile tilapia) (Tilapia nilotica)	phosphatidylinositol dephosphorylation [GO:0046856]		phosphatase activity [GO:0016791]	1.0036	-1.4662	APTIVDHR	0	0	0	0	0	0	0	0	0	0	0	0	0	0	0	0	0	0	0	0	0	0	0	0	0	0	0	0	1009.5	0	0	0	0	0	0	0	0	0	0	0
A0A669CCP4	ADAM metallopeptidase with thrombospondin type 1 motif 9	adamts9	Oreochromis niloticus (Nile tilapia) (Tilapia nilotica)	extracellular matrix organization [GO:0030198]; proteolysis [GO:0006508]	extracellular region [GO:0005576]	metalloendopeptidase activity [GO:0004222]; zinc ion binding [GO:0008270]	1.0021	-0.98358	LDISNLQSR	0	0	0	0	0	0	0	0	0	0	0	0	0	0	0	0	0	0	0	0	0	0	0	0	0	0	0	0	0	0	0	0	0	0	0	0	0	0	0	0
A0A669CCT1	Reverse transcriptase domain-containing protein		Oreochromis niloticus (Nile tilapia) (Tilapia nilotica)			catalytic activity [GO:0003824]	0	0.21228	DRLYVSLEALK	0	1180.2	1109.2	0	0	0	1319.6	1215	0	0	0	0	0	0	0	0	0	423.55	0	0	0	0	3339.7	0	0	0	0	0	0	0	0	0	0	0	0	0	0	0	0	331.08
A0A669CCV9	Mitochondrial import inner membrane translocase subunit TIM44	TIMM44	Oreochromis niloticus (Nile tilapia) (Tilapia nilotica)	protein import into mitochondrial matrix [GO:0030150]	mitochondrial inner membrane [GO:0005743]	protein-folding chaperone binding [GO:0051087]	0.99407	-0.81825	AISQGVESMK	0	0	0	0	0	0	0	0	0	0	0	0	0	0	0	0	0	0	0	0	0	0	0	0	0	0	0	0	0	0	0	0	0	0	0	0	0	0	0	0
A0A669CCY4	Cdk5 and Abl enzyme substrate 1	cables1	Oreochromis niloticus (Nile tilapia) (Tilapia nilotica)	regulation of cell cycle [GO:0051726]			0.99898	-1.0518	LTLSKIR	0	0	0	0	0	0	0	0	0	0	405.62	0	0	0	0	0	373.54	0	0	0	0	0	0	0	0	0	0	0	0	0	0	0	0	0	0	0	0	0	0	0
A0A669CCY6	Huntingtin-interacting protein 1-related protein	LOC100701843	Oreochromis niloticus (Nile tilapia) (Tilapia nilotica)	endocytosis [GO:0006897]	cytoplasm [GO:0005737]	actin binding [GO:0003779]; clathrin binding [GO:0030276]; phospholipid binding [GO:0005543]	0.99447	-0.33764	KPPLAQKPNIPPK	0	0	0	0	0	0	0	0	0	0	0	0	0	0	0	0	0	0	0	0	0	0	0	0	0	0	0	0	0	0	0	0	0	0	0	0	0	0	0	0
A0A669CD12	protein xylosyltransferase (EC 2.4.2.26)	LOC100703873	Oreochromis niloticus (Nile tilapia) (Tilapia nilotica)	chondroitin sulfate biosynthetic process [GO:0030206]; heparan sulfate proteoglycan biosynthetic process [GO:0015012]	Golgi membrane [GO:0000139]	metal ion binding [GO:0046872]; protein xylosyltransferase activity [GO:0030158]	0.98591	-0.60589	KPASPPLPPGLEVR	0	0	0	0	0	0	0	0	0	0	0	0	0	0	0	0	0	0	0	0	0	0	0	0	0	0	0	0	0	0	0	0	0	0	0	0	0	0	0	0
A0A669CD47	Hephaestin-like protein 1	LOC100702360	Oreochromis niloticus (Nile tilapia) (Tilapia nilotica)	copper ion transport [GO:0006825]		copper ion binding [GO:0005507]; oxidoreductase activity [GO:0016491]	1.0088	-0.2797	IGSIYKKAVFR	0	0	0	800.25	0	0	0	0	0	488.76	510.41	0	0	0	0	0	583.49	0	0	595.47	0	0	0	0	0	0	0	0	634.6	0	0	519.42	0	0	0	0	0	0	0	0
A0A669CD82	Homeobox domain-containing protein		Oreochromis niloticus (Nile tilapia) (Tilapia nilotica)	regulation of DNA-templated transcription [GO:0006355]	nucleus [GO:0005634]	DNA binding [GO:0003677]	1.0004	-0.94114	ALESHSSSSFSSR	5467.3	0	5326.8	0	0	3151.7	0	0	0	0	0	0	0	0	1130.2	0	2731.4	0	0	0	0	2550	0	0	0	0	1475.4	0	0	4595.4	0	0	0	0	0	2479.6	0	1843.1	2215.1	0
A0A669CDE8	Rho GTPase-activating protein 17	LOC100704392	Oreochromis niloticus (Nile tilapia) (Tilapia nilotica)	positive regulation of GTPase activity [GO:0043547]; signal transduction [GO:0007165]	cytoplasm [GO:0005737]	GTPase activator activity [GO:0005096]	0.98329	-0.74001	IVLSEIERR	0	0	0	0	0	0	0	0	0	0	0	0	0	0	0	0	0	0	0	0	0	0	0	0	0	0	0	0	0	0	0	0	0	0	0	0	0	0	0	0
A0A669CDJ9	Dystonin	DST	Oreochromis niloticus (Nile tilapia) (Tilapia nilotica)	intermediate filament cytoskeleton organization [GO:0045104]	cell projection [GO:0042995]; cytoplasm [GO:0005737]; membrane [GO:0016020]; microtubule [GO:0005874]	actin binding [GO:0003779]; calcium ion binding [GO:0005509]; microtubule binding [GO:0008017]	0.99901	-3.4228	DFLKTLR	3963.2	0	0	0	0	0	0	0	0	0	0	0	0	0	0	0	0	0	0	0	0	0	0	0	0	0	0	0	0	0	0	0	0	0	0	0	0	0	0	0
A0A669CDN5	Zinc finger protein 260-like	LOC106099054	Oreochromis niloticus (Nile tilapia) (Tilapia nilotica)				0.99003	-0.34486	FIEKGNLKSHMR	0	0	0	0	0	0	0	0	0	0	0	0	0	0	0	0	0	0	0	0	0	0	0	0	0	0	0	0	0	0	0	0	0	0	0	0	0	0	0	0
A0A669CDP1	Furry homolog b (Drosophila)		Oreochromis niloticus (Nile tilapia) (Tilapia nilotica)	cell morphogenesis [GO:0000902]			0.99755	-2.5784	IKKVVIYMCR	0	0	0	0	0	0	0	0	0	0	0	0	0	0	0	463.72	462.91	0	0	0	0	0	0	0	0	0	0	0	0	0	0	0	0	0	0	0	0	0	0	0
A0A669CDY8	ribonuclease H (EC 3.1.26.4)		Oreochromis niloticus (Nile tilapia) (Tilapia nilotica)	DNA integration [GO:0015074]		nucleic acid binding [GO:0003676]	1.0036	-1.6454	LLQQVYTLLGIKGLK	500.66	0	0	0	0	0	0	0	0	0	0	0	0	0	0	0	0	0	0	0	0	0	0	0	0	0	0	0	0	0	0	0	0	0	0	0	0	0	0	0
A0A669CE33	Septin 4a		Oreochromis niloticus (Nile tilapia) (Tilapia nilotica)			GTP binding [GO:0005525]	0.035714	0.13343	WRTRLTPTSCC	0	0	0	0	0	0	0	0	0	0	0	0	0	0	0	0	0	0	0	0	0	572.13	521.92	0	0	0	0	0	0	0	0	0	0	0	0	0	0	0	0	0
A0A669CEC2	Cyclin-dependent kinase 17	CDK17	Oreochromis niloticus (Nile tilapia) (Tilapia nilotica)	protein phosphorylation [GO:0006468]	cytoplasm [GO:0005737]	ATP binding [GO:0005524]; protein serine/threonine kinase activity [GO:0004674]	0.99061	-0.34378	ISAEDLNKR	0	67451	0	0	0	0	103410	0	0	0	0	0	0	0	0	0	0	0	0	0	0	74102	0	81467	0	0	0	0	0	68608	0	0	0	0	0	0	0	0	0	0
A0A669CEF9	SRCR domain-containing protein		Oreochromis niloticus (Nile tilapia) (Tilapia nilotica)		membrane [GO:0016020]	scavenger receptor activity [GO:0005044]	1.004	-0.97329	LAVSTRCSGR	0	0	0	0	0	0	1032.3	0	0	0	0	0	0	0	0	0	0	0	0	0	0	0	0	0	0	0	0	0	0	0	0	0	0	0	0	0	0	0	0	0
A0A669CEP8	Troponin I type 1b (skeletal, slow)		Oreochromis niloticus (Nile tilapia) (Tilapia nilotica)		troponin complex [GO:0005861]		0.9842	-0.50328	HKVSLDLRANLK	0	0	0	0	0	0	0	0	0	0	0	0	0	0	0	0	0	0	0	0	0	0	0	0	0	0	0	0	0	0	0	0	0	0	0	0	0	0	0	0
A0A669CET9	Uncharacterized LOC102077492	LOC102077492	Oreochromis niloticus (Nile tilapia) (Tilapia nilotica)				1.0044	-0.97329	IIARTLDIHR	0	0	0	0	0	0	0	0	0	0	0	0	0	0	0	0	0	0	0	0	0	0	0	0	0	0	0	0	0	0	0	0	0	0	0	0	0	0	0	0
A0A669CEW8	Reverse transcriptase domain-containing protein		Oreochromis niloticus (Nile tilapia) (Tilapia nilotica)		membrane [GO:0016020]	2-oxoglutarate-dependent dioxygenase activity [GO:0016706]; methyltransferase activity [GO:0008168]	0.99825	-1.016	KLTDLGISSLICK	0	0	0	0	0	0	0	0	0	0	0	0	0	0	0	0	0	0	0	0	0	0	0	0	0	0	0	0	0	0	0	0	0	0	0	0	0	0	0	0
A0A669CEZ9	APC membrane recruitment protein 2		Oreochromis niloticus (Nile tilapia) (Tilapia nilotica)		membrane [GO:0016020]		0.98969	0.024224	LPPATKPTSAPVLLDK	0	0	0	0	0	0	0	0	0	0	0	0	0	0	0	0	0	0	0	0	419.04	0	0	0	0	0	0	0	0	0	0	0	0	0	0	0	0	0	0	0
A0A669CF08	Vav 3 guanine nucleotide exchange factor b		Oreochromis niloticus (Nile tilapia) (Tilapia nilotica)	cell surface receptor signaling pathway [GO:0007166]; intracellular signal transduction [GO:0035556]		guanyl-nucleotide exchange factor activity [GO:0005085]; metal ion binding [GO:0046872]	0.98583	-0.76167	RNVGLPR	4116.8	4070.1	3922.5	4565.4	4714.4	4856.9	5551.4	5345.9	5588.8	0	4285.8	4197.2	3759.9	3508.1	3633.7	2864.6	2878.4	2732.9	4083.2	3521.5	3350.1	2086.5	0	2133.1	0	13464	0	0	0	2523.2	3490	2964.3	3065.9	5247.3	0	0	2244.3	0	0	0
A0A669CF14	Mitogen-activated protein kinase 8 interacting protein 3		Oreochromis niloticus (Nile tilapia) (Tilapia nilotica)		cytoplasm [GO:0005737]	MAP-kinase scaffold activity [GO:0005078]	1.0075	-1.2292	VDQQMFESLHR	0	0	0	0	0	0	0	0	0	0	0	0	0	0	0	0	0	0	0	0	0	0	0	0	0	0	0	0	0	0	0	0	0	0	0	0	0	0	0	0
A0A669CF42	Si:ch211-233a24.2		Oreochromis niloticus (Nile tilapia) (Tilapia nilotica)		membrane [GO:0016020]		0.99955	-1.7245	LGASEGTINQEIQR	0	0	0	0	0	0	0	0	0	0	0	0	0	0	0	0	0	0	0	0	0	30878	0	30745	0	0	0	0	0	0	0	0	0	0	0	0	0	0	0	0
A0A669CF83	Contactin-3	LOC100695819	Oreochromis niloticus (Nile tilapia) (Tilapia nilotica)		membrane [GO:0016020]		1.0061	-1.3439	LITKEVIK	0	0	0	0	0	0	0	0	0	0	0	0	0	597.39	0	0	0	0	0	0	0	0	0	0	0	0	0	0	0	0	0	0	0	0	0	0	0	0	0	0
A0A669CFB3	Serine palmitoyltransferase long chain base subunit 2	sptlc2	Oreochromis niloticus (Nile tilapia) (Tilapia nilotica)	biosynthetic process [GO:0009058]	membrane [GO:0016020]	pyridoxal phosphate binding [GO:0030170]; transferase activity [GO:0016740]	0.99764	-1.0518	QSKSEAR	0	0	0	0	0	0	0	0	0	0	1254	0	0	0	0	0	0	0	0	1026.7	0	0	640.32	0	0	0	0	0	0	0	0	0	880.27	0	0	0	0	0	0	0
A0A669CFC0	Ribosome biogenesis protein NOP53	nop53	Oreochromis niloticus (Nile tilapia) (Tilapia nilotica)	ribosomal large subunit assembly [GO:0000027]	nucleolus [GO:0005730]; nucleoplasm [GO:0005654]		1.0019	-1.0818	GVVPRSKK	0	0	0	0	0	0	0	0	0	0	0	0	0	0	0	0	0	0	0	0	0	0	0	0	0	0	0	0	0	0	0	0	0	0	0	0	0	0	0	0
A0A669CFF1	Vang-like protein	VANGL1	Oreochromis niloticus (Nile tilapia) (Tilapia nilotica)		plasma membrane [GO:0005886]		0.9759	0.10527	ALQKYLRTTK	0	0	0	3144.4	0	0	6620.9	7780.1	6529.1	1806.1	0	1985.3	1052.7	1108.6	0	2983	0	3065.9	2570.8	2230.5	2099.5	0	2154.7	2044.9	1559.1	0	0	0	3950	0	3588.1	0	3552.6	0	2303.2	0	2223.3	0	0	2354.6
A0A669CFS8	Ubiquitin carboxyl-terminal hydrolase (EC 3.4.19.12)	usp5	Oreochromis niloticus (Nile tilapia) (Tilapia nilotica)	protein deubiquitination [GO:0016579]; ubiquitin-dependent protein catabolic process [GO:0006511]		cysteine-type deubiquitinase activity [GO:0004843]; DNA binding [GO:0003677]; zinc ion binding [GO:0008270]	1.0042	-0.91394	LGTITPDGAAR	0	0	0	0	0	0	0	0	0	0	0	0	0	0	0	0	0	0	0	0	0	0	0	0	0	0	0	0	0	0	0	0	0	0	0	0	0	0	0	0
A0A669CFU1	Integrator complex subunit 8	ints8	Oreochromis niloticus (Nile tilapia) (Tilapia nilotica)	snRNA 3'-end processing [GO:0034472]	nucleus [GO:0005634]		1.0007	-1.0538	VLVEQMRK	0	0	0	0	0	0	0	490.05	536.93	0	0	0	469.71	539.15	0	0	0	0	0	0	521.44	0	0	0	0	0	0	459.19	0	0	512.75	574.11	0	0	0	0	647.1	0	615.55	0
A0A669CFY1	EMAP like 3	eml3	Oreochromis niloticus (Nile tilapia) (Tilapia nilotica)		membrane [GO:0016020]		0.99047	-0.76167	KHTDCVR	0	0	0	0	0	0	0	0	0	0	0	0	0	0	0	0	0	0	0	0	0	0	0	0	0	0	0	0	0	0	0	0	0	0	0	0	0	0	0	0
A0A669CFY3	Ras-interacting protein 1	LOC100701657	Oreochromis niloticus (Nile tilapia) (Tilapia nilotica)				0.9973	-1.0518	KPTIRER	2664.7	0	2727.2	3155.8	2912.8	3251.9	3342.3	3583.4	3648.6	3163.4	3054.4	0	2738.4	2383	2514.7	2182.3	2146.6	1955.3	2737	2855.2	2950.5	1487.1	1702.5	1632	0	8723.4	0	1816.7	1698.8	1691.9	2536	2402.6	2552.7	3424.2	0	0	1876.7	1873	1841.5	2812.3
A0A669CG13	Aurora kinase A interacting protein 1	aurkaip1	Oreochromis niloticus (Nile tilapia) (Tilapia nilotica)				1.0021	-2.1055	CKNVLEIR	0	0	0	3155.8	0	3251.9	0	0	0	0	0	3070	0	0	2514.7	0	0	0	0	0	0	0	0	0	0	0	0	1816.7	1698.8	0	0	0	0	0	0	0	0	0	0	0
A0A669CG48	Uncharacterized protein		Oreochromis niloticus (Nile tilapia) (Tilapia nilotica)				0.99705	-4.0759	MKSSKTLK	0	0	0	0	0	0	0	0	0	0	0	0	0	0	0	0	0	0	0	0	0	0	0	0	0	0	0	0	0	0	0	0	0	0	0	0	0	0	0	0
A0A669CG76	Trafficking protein particle complex 8	trappc8	Oreochromis niloticus (Nile tilapia) (Tilapia nilotica)				0.99881	-3.2337	TLATPLQR	0	0	717.2	0	0	0	0	0	0	0	0	0	0	0	0	0	0	0	0	0	0	0	0	0	0	0	0	0	0	0	0	0	0	0	0	0	0	0	0	0
A0A669CG83	Alpha-1,4 glucan phosphorylase (EC 2.4.1.1)		Oreochromis niloticus (Nile tilapia) (Tilapia nilotica)	glycogen metabolic process [GO:0005977]		glycogen phosphorylase activity [GO:0008184]; linear malto-oligosaccharide phosphorylase activity [GO:0102250]; pyridoxal phosphate binding [GO:0030170]; SHG alpha-glucan phosphorylase activity [GO:0102499]	1.002	-1.6735	DPNKQWTPR	0	0	0	0	0	0	0	0	0	0	0	0	0	0	0	0	0	0	0	0	0	0	0	0	0	0	0	0	0	0	0	0	0	0	0	0	0	0	0	0
A0A669CG98	Betaine--homocysteine S-methyltransferase 1	LOC100705166	Oreochromis niloticus (Nile tilapia) (Tilapia nilotica)	methionine biosynthetic process [GO:0009086]; methylation [GO:0032259]		methyltransferase activity [GO:0008168]; zinc ion binding [GO:0008270]	0	0.32664	ALAEELAPER	0	0	0	0	0	0	0	0	0	0	0	0	0	0	0	0	0	0	0	0	0	0	0	0	0	0	0	0	0	0	0	0	0	0	0	0	0	0	0	0
A0A669CGB5	Myosin heavy chain, fast skeletal muscle	LOC100705031	Oreochromis niloticus (Nile tilapia) (Tilapia nilotica)	system development [GO:0048731]	myosin complex [GO:0016459]	actin filament binding [GO:0051015]; ATP binding [GO:0005524]; cytoskeletal motor activity [GO:0003774]	1.0004	-1.9099	EEDIHPR	0	999.34	0	0	0	0	0	0	1212.3	0	0	0	0	0	0	0	0	0	0	0	0	0	1083.9	0	0	755.02	0	0	0	0	0	0	0	0	0	0	0	0	0	0
A0A669CGG1	ATP-dependent RNA helicase (EC 3.6.4.13)	ddx24	Oreochromis niloticus (Nile tilapia) (Tilapia nilotica)			ATP binding [GO:0005524]; hydrolase activity [GO:0016787]; RNA binding [GO:0003723]; RNA helicase activity [GO:0003724]	0.99588	-0.8319	VGIKSKPKVVDLTR	0	0	0	0	0	0	0	489.03	0	0	0	0	0	0	0	0	0	0	0	0	0	0	0	0	0	0	0	0	736.83	0	0	0	0	0	0	0	0	0	0	938.42
A0A669CGI4	Nardilysin	LOC100693897	Oreochromis niloticus (Nile tilapia) (Tilapia nilotica)	proteolysis [GO:0006508]		metal ion binding [GO:0046872]; metalloendopeptidase activity [GO:0004222]	1.0013	-0.28013	EKQINTYERLR	0	0	0	0	0	0	0	0	0	0	0	0	0	0	0	0	0	0	0	0	0	0	2559.8	2582.8	0	0	0	0	0	0	0	0	0	0	0	0	0	0	0	0
A0A669CGI7	FAT atypical cadherin 1	fat1	Oreochromis niloticus (Nile tilapia) (Tilapia nilotica)	homophilic cell adhesion via plasma membrane adhesion molecules [GO:0007156]	plasma membrane [GO:0005886]	calcium ion binding [GO:0005509]	1.0121	-1.1524	TTISELAPR	0	0	0	0	0	0	0	0	0	0	0	0	0	0	0	0	0	0	0	0	0	0	0	0	1520.7	0	0	0	0	0	0	0	0	0	0	0	0	0	0	0
A0A669CGP1	Reverse transcriptase domain-containing protein		Oreochromis niloticus (Nile tilapia) (Tilapia nilotica)			2-oxoglutarate-dependent dioxygenase activity [GO:0016706]; methyltransferase activity [GO:0008168]	0.98691	-0.11515	KALQRVINTAQK	0	0	0	0	0	0	0	0	0	0	0	0	0	0	0	0	0	0	0	0	0	0	0	0	0	0	0	0	0	0	0	0	0	0	0	0	0	0	0	0
A0A669CGU8	ABC-type glutathione-S-conjugate transporter (EC 7.6.2.3)	LOC100712516	Oreochromis niloticus (Nile tilapia) (Tilapia nilotica)		plasma membrane [GO:0005886]	ABC-type transporter activity [GO:0140359]; ATP binding [GO:0005524]; ATP hydrolysis activity [GO:0016887]	0.99978	-1.8704	ALEHSHLHK	0	0	0	0	0	0	0	0	0	0	0	0	0	0	0	0	0	0	0	0	0	0	0	0	0	0	0	0	0	0	0	0	0	0	0	0	0	0	0	0
A0A669CGW7	Uncharacterized protein		Oreochromis niloticus (Nile tilapia) (Tilapia nilotica)				1.0136	-1.1741	TEPAGSR	0	0	0	0	0	0	0	0	0	0	0	0	0	0	0	0	0	0	0	0	0	0	0	0	0	0	0	0	0	0	0	0	0	0	0	0	0	0	0	0
A0A669CH13	Protocadherin gamma-C5	LOC100711027	Oreochromis niloticus (Nile tilapia) (Tilapia nilotica)	homophilic cell adhesion via plasma membrane adhesion molecules [GO:0007156]	plasma membrane [GO:0005886]	calcium ion binding [GO:0005509]	0.98181	-0.39719	GVLLVRERIDR	0	0	0	0	0	0	0	0	0	0	0	0	0	0	0	0	0	0	0	0	0	0	0	0	0	0	0	0	0	0	0	0	0	0	0	0	0	0	0	0
A0A669CH58	Mitochondrial ribosomal protein L1		Oreochromis niloticus (Nile tilapia) (Tilapia nilotica)				0.99467	-0.76796	FPDMATCTR	0	0	0	0	0	0	0	0	0	0	0	0	0	0	0	0	0	0	0	0	0	0	0	0	310.58	0	0	0	0	0	0	0	0	0	0	0	0	0	0	0
A0A669CH92	Capping protein, Arp2/3 and myosin-I linker protein 3	LOC100690439	Oreochromis niloticus (Nile tilapia) (Tilapia nilotica)		cellular anatomical entity [GO:0110165]		0.98974	-0.71556	TAEVLQADK	0	0	0	0	0	0	0	0	0	0	0	0	0	0	0	0	0	0	0	0	0	8727.9	8818	0	0	0	0	0	0	0	0	0	0	0	0	0	0	0	0	0
A0A669CHC5	Uncharacterized protein		Oreochromis niloticus (Nile tilapia) (Tilapia nilotica)		membrane [GO:0016020]		1.0088	-1.3439	LCVRLCVR	0	0	0	0	0	0	0	0	0	0	0	0	0	0	0	0	0	0	0	0	0	0	0	0	0	0	0	0	0	0	0	0	0	0	0	0	0	0	0	0
A0A669CHC7	Nck-associated protein 5	LOC102081047	Oreochromis niloticus (Nile tilapia) (Tilapia nilotica)				0.9876	-0.76167	LPAPSKK	0	0	0	0	309.57	0	0	0	0	0	0	0	0	0	0	0	0	0	0	0	0	0	0	0	0	0	0	0	0	0	0	0	0	0	0	0	0	0	0	0
A0A669CHG3	NIMA related kinase 8	nek8	Oreochromis niloticus (Nile tilapia) (Tilapia nilotica)	protein phosphorylation [GO:0006468]	cytoplasm [GO:0005737]	ATP binding [GO:0005524]; protein kinase activity [GO:0004672]	0.99867	-1.0518	SSRAPCK	0	0	0	0	0	0	0	0	0	0	0	0	0	0	0	0	0	0	0	0	0	0	0	0	0	0	0	0	0	0	0	0	0	0	0	0	0	0	0	0
A0A669CHJ0	Macrophage-expressed gene 1 protein (Perforin-2)	LOC100697517	Oreochromis niloticus (Nile tilapia) (Tilapia nilotica)		cytoplasmic vesicle membrane [GO:0030659]		0.99864	-1.0518	MKTHQVR	0	0	0	883.89	0	0	0	0	0	0	0	0	925.65	0	0	0	0	0	0	0	0	524.64	0	0	0	0	0	0	0	0	0	0	0	0	1547.9	0	0	0	0	884.31
A0A669CHT0	Neuropilin	nrp1	Oreochromis niloticus (Nile tilapia) (Tilapia nilotica)	angiogenesis [GO:0001525]; axon guidance [GO:0007411]; regulation of response to external stimulus [GO:0032101]	membrane [GO:0016020]	heparin binding [GO:0008201]; metal ion binding [GO:0046872]; semaphorin receptor activity [GO:0017154]; vascular endothelial growth factor receptor activity [GO:0005021]	1.0118	-1.1741	SPGFPEK	0	1591.2	0	0	0	0	0	0	0	0	0	1724.8	0	0	0	0	0	0	0	0	0	0	0	0	0	0	0	0	0	0	0	0	0	0	0	0	0	0	0	0
A0A669CHT1	Sodium channel protein		Oreochromis niloticus (Nile tilapia) (Tilapia nilotica)	regulation of monoatomic ion transmembrane transport [GO:0034765]	voltage-gated sodium channel complex [GO:0001518]	calcium ion binding [GO:0005509]; voltage-gated monoatomic ion channel activity [GO:0005244]; voltage-gated sodium channel activity [GO:0005248]	0.99978	-1.7035	IAESCELPR	0	954.84	0	0	0	0	0	0	0	0	0	0	0	0	0	0	0	0	0	0	0	0	0	0	0	0	0	0	0	819.06	0	0	0	0	0	0	0	0	0	0
A0A669CHX6	Reverse transcriptase domain-containing protein		Oreochromis niloticus (Nile tilapia) (Tilapia nilotica)			catalytic activity [GO:0003824]	0.98562	-0.11515	LINRLYITPEKR	0	0	0	746.63	0	0	0	512.25	573.66	0	0	0	0	0	0	0	0	0	2089.1	2042.9	0	0	0	0	0	594.75	0	0	0	0	0	0	0	0	0	0	0	0	0	0
A0A669CHZ6	Prominin 1	prom1	Oreochromis niloticus (Nile tilapia) (Tilapia nilotica)		microvillus membrane [GO:0031528]		1.0065	-0.91394	SVIPSLDTALR	0	0	0	0	0	0	0	0	0	0	0	0	0	0	0	0	0	0	0	0	0	0	0	0	0	0	0	0	0	0	0	0	0	0	0	0	0	0	0	0
A0A669CHZ9	ATP-dependent DNA helicase (EC 3.6.4.12)		Oreochromis niloticus (Nile tilapia) (Tilapia nilotica)	DNA recombination [GO:0006310]; DNA repair [GO:0006281]; telomere maintenance [GO:0000723]		ATP binding [GO:0005524]; DNA helicase activity [GO:0003678]; hydrolase activity [GO:0016787]	1.0139	-1.1741	MSGLPEK	0	0	0	0	0	0	0	0	0	1523.3	0	0	0	0	0	0	0	961.22	0	0	0	0	0	0	4239.9	0	0	0	0	0	0	0	1268.1	0	0	0	0	0	0	1291.9
A0A669CI19	CST complex subunit CTC1		Oreochromis niloticus (Nile tilapia) (Tilapia nilotica)		chromosome, telomeric region [GO:0000781]; nucleus [GO:0005634]	single-stranded DNA binding [GO:0003697]	0.98973	-0.71167	LTLCDQAGR	11563	0	0	0	6531	0	0	0	0	0	0	0	0	0	2442.5	5376.3	0	0	0	0	0	0	0	0	0	0	0	0	0	0	0	0	0	0	4265.3	0	0	6481.7	6767.4	0
A0A669CI64	Citron rho-interacting serine/threonine kinase b		Oreochromis niloticus (Nile tilapia) (Tilapia nilotica)	cell development [GO:0048468]	cellular anatomical entity [GO:0110165]	metal ion binding [GO:0046872]	1.0066	-0.90856	IAELSEANK	0	0	0	0	0	0	0	0	0	0	0	0	0	0	0	0	0	0	0	0	0	0	0	8960.2	0	0	0	0	0	0	0	0	0	0	0	0	0	0	407.83	0
A0A669CIC5	Vesicle transport through interaction with t-SNAREs 1B	vti1b	Oreochromis niloticus (Nile tilapia) (Tilapia nilotica)	vesicle-mediated transport [GO:0016192]	membrane [GO:0016020]		1.0026	-1.0793	SLYEELK	0	0	0	0	0	0	0	0	0	0	0	0	0	0	0	0	0	0	0	0	0	0	0	0	0	0	0	0	0	0	0	0	0	0	0	0	0	0	0	0
A0A669CID7	Unc-45 myosin chaperone B		Oreochromis niloticus (Nile tilapia) (Tilapia nilotica)	cell differentiation [GO:0030154]; muscle organ development [GO:0007517]	perinuclear region of cytoplasm [GO:0048471]		1.0015	-1.9755	TILLSLLEMVASKK	0	0	0	0	0	0	0	0	0	0	0	0	0	0	0	0	0	0	0	0	0	0	0	0	0	0	0	0	0	0	0	0	0	0	0	0	0	0	0	0
A0A669CIF8	Toll-like receptor 1	LOC109204746	Oreochromis niloticus (Nile tilapia) (Tilapia nilotica)	inflammatory response [GO:0006954]; innate immune response [GO:0045087]; toll-like receptor signaling pathway [GO:0002224]	membrane [GO:0016020]	transmembrane signaling receptor activity [GO:0004888]	0.99062	-0.32188	NLKNLTLVGNSLK	816.15	0	0	0	0	0	0	0	0	0	0	0	0	0	438.27	603.48	0	512.23	0	0	0	0	0	0	0	0	397.47	630.95	542.1	664.67	0	0	475.16	0	0	0	0	0	0	0
A0A669CIG1	RNA helicase (EC 3.6.4.13)		Oreochromis niloticus (Nile tilapia) (Tilapia nilotica)		nucleus [GO:0005634]	ATP binding [GO:0005524]; RNA binding [GO:0003723]; RNA helicase activity [GO:0003724]	0.98143	-0.63073	KWLGEVKK	0	0	0	0	0	0	0	0	0	0	0	0	0	0	0	0	0	0	0	0	0	1478.7	0	0	0	0	0	0	0	0	0	0	0	0	0	0	0	0	0	0
A0A669CIS1	Uncharacterized LOC106097715	LOC106097715	Oreochromis niloticus (Nile tilapia) (Tilapia nilotica)		membrane [GO:0016020]		0.96793	-0.15542	GRPLFSVKHLK	0	0	0	0	0	0	0	0	0	0	0	0	0	0	0	0	0	0	0	0	0	0	0	0	0	0	0	0	0	0	0	0	0	0	0	0	0	0	0	0
A0A669CIY1	Calcium-dependent secretion activator 1	LOC100708976	Oreochromis niloticus (Nile tilapia) (Tilapia nilotica)	dense core granule exocytosis [GO:1990504]; protein transport [GO:0015031]; synaptic vesicle exocytosis [GO:0016079]	cytoplasmic vesicle [GO:0031410]; presynapse [GO:0098793]		0.98676	-0.59014	FVVILESVLTKLSR	0	0	0	0	0	0	0	0	0	0	0	0	0	0	0	0	395.44	0	0	0	0	0	0	0	0	0	0	0	0	0	0	0	0	0	0	0	0	0	0	0
A0A669CJ50	Calnexin	canx	Oreochromis niloticus (Nile tilapia) (Tilapia nilotica)	protein folding [GO:0006457]	endoplasmic reticulum [GO:0005783]; membrane [GO:0016020]	calcium ion binding [GO:0005509]; unfolded protein binding [GO:0051082]	1.0058	-0.19442	SVTLSGIR	0	0	1130.9	0	1060.1	0	0	2735.1	0	0	0	0	0	0	0	0	0	0	0	898.26	0	0	0	0	902.58	0	554.81	0	2497	1863.8	907.2	0	0	0	0	0	791	0	0	0
A0A669CJE7	Adhesion G protein-coupled receptor L2	LOC100702950	Oreochromis niloticus (Nile tilapia) (Tilapia nilotica)	cell surface receptor signaling pathway [GO:0007166]	plasma membrane [GO:0005886]	carbohydrate binding [GO:0030246]; G protein-coupled receptor activity [GO:0004930]	0.99375	-0.7664	AALPFGLVR	0	0	0	0	0	0	0	0	3835.5	0	0	3782.4	2932.3	0	0	0	0	0	0	3283.5	3530.9	0	0	0	0	8565.1	8749.9	2386.7	0	0	0	0	0	0	0	0	2795	0	0	0
A0A669CJH2	Rap guanine nucleotide exchange factor 2	rapgef2	Oreochromis niloticus (Nile tilapia) (Tilapia nilotica)	proteolysis [GO:0006508]; small GTPase mediated signal transduction [GO:0007264]		guanyl-nucleotide exchange factor activity [GO:0005085]	0.99822	-1.7831	NGAPHLPK	0	0	0	0	0	0	0	0	0	0	0	0	0	0	0	0	0	0	0	0	0	0	0	0	0	0	0	0	0	0	0	0	0	2651	0	0	0	0	551.36	0
A0A669CJL8	RFNG O-fucosylpeptide 3-beta-N-acetylglucosaminyltransferase		Oreochromis niloticus (Nile tilapia) (Tilapia nilotica)		membrane [GO:0016020]	glycosyltransferase activity [GO:0016757]	0.9816	-0.38771	KEITAGLNR	0	0	0	0	0	0	0	0	0	0	0	0	0	0	0	0	0	0	0	0	0	0	0	0	0	0	0	0	0	0	0	0	0	0	0	0	0	0	0	0
A0A669CJN9	TBC1 domain family member 8	TBC1D8	Oreochromis niloticus (Nile tilapia) (Tilapia nilotica)			calcium ion binding [GO:0005509]	1.0021	-2.0948	EVKFVIPWAEVTR	0	0	0	0	0	0	0	0	0	0	0	0	0	0	0	0	0	0	0	0	0	0	1544.2	0	0	0	0	0	0	0	0	0	0	0	0	0	0	0	0	0
A0A669CJQ3	Glucosaminyl (N-acetyl) transferase 3, mucin type		Oreochromis niloticus (Nile tilapia) (Tilapia nilotica)		Golgi membrane [GO:0000139]	glycosyltransferase activity [GO:0016757]	0.98592	-0.76167	SVFEDKR	1847.7	0	0	0	0	0	0	0	0	0	0	0	0	0	0	0	0	0	0	0	0	0	0	0	0	0	0	0	0	0	0	0	0	0	0	0	0	0	0	0
A0A669CJR6	SET binding protein 1	setbp1	Oreochromis niloticus (Nile tilapia) (Tilapia nilotica)			DNA binding [GO:0003677]	0.98539	-0.11364	LDKAERADK	0	0	0	0	0	0	0	0	101440	60352	0	60007	0	0	0	0	46201	0	0	0	66450	0	0	0	0	0	0	0	0	0	0	0	0	0	0	0	72451	0	0	64662
A0A669CJR7	Integrase catalytic domain-containing protein		Oreochromis niloticus (Nile tilapia) (Tilapia nilotica)	DNA integration [GO:0015074]		nucleic acid binding [GO:0003676]	0.98333	0.0035636	YNIKHFSTASEVKCSIVER	0	0	0	0	0	0	0	0	0	0	0	0	0	0	0	0	0	0	0	0	0	0	0	0	0	0	0	0	782.51	0	0	0	0	0	0	0	0	0	0	0
A0A669CJS8	Nuclear receptor ROR-alpha	LOC100700925	Oreochromis niloticus (Nile tilapia) (Tilapia nilotica)		nucleus [GO:0005634]	nuclear receptor activity [GO:0004879]; sequence-specific DNA binding [GO:0043565]; zinc ion binding [GO:0008270]	0.99609	-0.29422	EEIQTYQSK	1610.8	1436.4	1460.8	816.72	0	0	1536.2	1268.2	1491	502.26	0	0	0	0	0	599.17	657.55	601.72	658.98	529.4	598.28	650.59	0	0	0	497.25	497.83	1342.8	0	1438.4	640.1	788.49	738.55	0	0	0	1117.4	1138.8	1130.7	451.14
A0A669CJT5	S-antigen; retina and pineal gland (arrestin) b		Oreochromis niloticus (Nile tilapia) (Tilapia nilotica)	signal transduction [GO:0007165]			1.0036	-1.6236	AAFSRDLR	0	0	0	0	0	0	424.45	0	0	0	0	0	0	0	0	0	0	0	0	0	0	0	0	0	0	0	0	0	0	0	0	0	0	0	0	0	0	0	0	0
A0A669CK00	FLII actin remodeling protein	flii	Oreochromis niloticus (Nile tilapia) (Tilapia nilotica)			actin filament binding [GO:0051015]	1.0048	-1.0956	GVDLSGNDFK	0	0	0	0	0	0	0	0	0	0	0	0	0	0	0	0	0	0	0	0	0	0	0	0	0	0	0	0	0	0	0	0	0	0	0	0	0	0	0	0
A0A669CK10	C2H2-type domain-containing protein		Oreochromis niloticus (Nile tilapia) (Tilapia nilotica)				0.99781	-3.1414	EFSNSSEK	0	0	0	0	0	0	0	0	0	0	0	0	0	0	0	0	0	0	0	0	0	437.69	0	0	0	0	0	0	0	0	0	0	0	0	0	0	0	0	0	0
A0A669CK18	Coronin	LOC100704978	Oreochromis niloticus (Nile tilapia) (Tilapia nilotica)				1.0073	-1.5734	EVASGGSKEVRSR	0	0	0	0	0	0	0	0	0	0	0	0	0	0	0	0	0	0	0	0	0	3493.4	3048.9	2661.3	0	0	0	0	0	0	0	0	0	0	0	0	0	0	0	0
A0A669CKE3	Regulator of G protein signaling 12a		Oreochromis niloticus (Nile tilapia) (Tilapia nilotica)	signal transduction [GO:0007165]		GTPase activator activity [GO:0005096]	0.99395	-2.8143	LDLVPINR	0	0	607.43	0	0	1175.1	0	0	0	0	1135.6	0	0	0	0	0	0	0	0	0	0	0	0	1056.7	0	0	769.38	0	1414.7	0	654.8	664.24	552.84	0	0	0	0	1153.9	1180	0
A0A669CKX5	Nebulin		Oreochromis niloticus (Nile tilapia) (Tilapia nilotica)		cytoplasm [GO:0005737]	actin binding [GO:0003779]	0.99766	-5.3111	HVSELISKVLYRQK	0	0	0	0	0	0	0	0	1164.3	0	0	0	0	0	0	0	0	0	1663.8	0	0	0	0	0	0	0	0	0	0	0	0	0	0	0	0	0	0	0	0	0
A0A669CL20	THAP domain-containing protein 1		Oreochromis niloticus (Nile tilapia) (Tilapia nilotica)	cell cycle [GO:0007049]; endothelial cell proliferation [GO:0001935]	nucleoplasm [GO:0005654]	DNA-binding transcription factor activity [GO:0003700]; sequence-specific DNA binding [GO:0043565]	0.99229	-0.79979	EGWVPNDGSRK	0	0	0	0	0	0	0	0	0	0	0	0	0	0	0	0	0	0	0	0	0	0	0	0	0	0	0	0	0	0	0	0	0	0	0	0	0	0	0	0
A0A669CL82	Reverse transcriptase domain-containing protein		Oreochromis niloticus (Nile tilapia) (Tilapia nilotica)				1.0038	-1.6487	APSRRHR	0	0	0	0	0	0	0	638.66	530.17	0	0	0	0	0	0	0	0	0	0	0	0	0	0	0	0	0	0	0	0	0	0	0	0	0	0	0	0	0	0	0
A0A669CLA3	Phospholipid-transporting ATPase (EC 7.6.2.1)	atp10a	Oreochromis niloticus (Nile tilapia) (Tilapia nilotica)	phospholipid transport [GO:0015914]	membrane [GO:0016020]	ATP binding [GO:0005524]; ATP hydrolysis activity [GO:0016887]; ATPase-coupled intramembrane lipid transporter activity [GO:0140326]; magnesium ion binding [GO:0000287]	1.0017	-1.4662	LGLVIDGR	0	0	0	0	0	0	0	0	0	0	0	0	0	139440	148030	0	0	0	0	0	0	0	0	0	0	0	0	0	0	0	0	0	0	0	0	0	0	0	0	0
A0A669CLH2	Neurturin	LOC100693532	Oreochromis niloticus (Nile tilapia) (Tilapia nilotica)	system development [GO:0048731]	extracellular region [GO:0005576]	glial cell-derived neurotrophic factor receptor binding [GO:0030116]; growth factor activity [GO:0008083]; receptor tyrosine kinase binding [GO:0030971]	1.0057	-1.4662	ENYDMVMK	0	0	0	0	0	0	0	0	0	0	0	0	0	0	0	0	0	0	0	0	0	0	0	0	0	0	0	0	0	0	0	0	0	0	0	0	0	0	0	0
A0A669CLH7	Plexin-B1	LOC100711384	Oreochromis niloticus (Nile tilapia) (Tilapia nilotica)	axon guidance [GO:0007411]	plasma membrane [GO:0005886]	semaphorin receptor activity [GO:0017154]	0.98337	-0.75409	EESKIVSLSIPR	0	0	0	0	0	0	0	0	0	0	0	0	0	0	0	0	0	0	0	0	0	0	0	0	0	0	0	0	0	0	0	0	0	0	0	0	0	0	0	0
A0A669CLJ3	Reverse transcriptase domain-containing protein		Oreochromis niloticus (Nile tilapia) (Tilapia nilotica)		membrane [GO:0016020]		0.97119	-0.087841	KQLKTHLFK	0	0	0	0	0	0	0	0	0	0	0	0	0	0	0	0	0	0	0	0	0	0	0	0	0	0	0	0	0	0	0	0	0	0	0	0	0	0	0	0
A0A669CLL2	DNA-directed RNA polymerase (EC 2.7.7.6)	polrmt	Oreochromis niloticus (Nile tilapia) (Tilapia nilotica)	DNA-templated transcription [GO:0006351]	DNA-directed RNA polymerase complex [GO:0000428]	DNA binding [GO:0003677]; DNA-directed 5'-3' RNA polymerase activity [GO:0003899]	0.98429	-0.60558	SLLRVCAFAKLLSR	0	0	0	0	0	0	0	0	0	0	0	0	0	0	0	0	0	0	0	0	0	0	0	0	0	0	0	0	0	0	0	0	0	0	0	0	0	0	0	0
A0A669CLM0	Ig-like domain-containing protein		Oreochromis niloticus (Nile tilapia) (Tilapia nilotica)			cysteine-type endopeptidase activity [GO:0004197]	0.99377	-0.76762	LSYAVFIFK	0	0	0	0	0	0	0	0	0	0	0	0	0	0	0	0	0	0	0	0	0	0	0	0	0	0	0	0	0	0	0	0	0	0	0	0	0	0	0	0
A0A669CLN2	Acyl-CoA synthetase bubblegum family member 2	acsbg2	Oreochromis niloticus (Nile tilapia) (Tilapia nilotica)	lipid metabolic process [GO:0006629]			1.0014	-1.0301	RPVVVKMYK	0	0	0	1525.9	0	1587.4	0	0	0	0	0	0	0	0	1062.6	1251.2	0	0	0	1458.6	0	732.32	0	668.19	1195.2	0	0	1058.7	0	0	0	0	1318.7	0	0	0	0	0	1291.8	0
A0A669CLU2	ClpB homolog, mitochondrial AAA ATPase chaperonin	CLPB	Oreochromis niloticus (Nile tilapia) (Tilapia nilotica)			ATP binding [GO:0005524]; ATP hydrolysis activity [GO:0016887]	0.99283	-0.33863	RRFPLER	0	0	0	0	0	0	0	532.81	643.16	0	0	0	0	0	0	0	0	0	0	0	0	0	0	0	0	0	0	0	0	0	0	0	0	0	0	0	0	0	0	0
A0A669CLY5	RAN binding protein 1	ranbp1	Oreochromis niloticus (Nile tilapia) (Tilapia nilotica)	nucleocytoplasmic transport [GO:0006913]			1.0198	-0.0016475	TLEEDEEELFKMRAK	644.98	719.84	688.29	0	0	0	651.55	615.79	656.56	0	0	0	0	0	0	0	0	0	422.06	0	0	0	0	0	0	0	0	0	530.64	559.21	0	0	0	0	0	0	0	0	0	0
A0A669CLZ5	Tumor protein 63 (p63)	tp63	Oreochromis niloticus (Nile tilapia) (Tilapia nilotica)	apoptotic process [GO:0006915]; cell cycle [GO:0007049]; protein tetramerization [GO:0051262]	cytoplasm [GO:0005737]; nucleus [GO:0005634]	DNA-binding transcription factor activity [GO:0003700]; metal ion binding [GO:0046872]; transcription cis-regulatory region binding [GO:0000976]	1.0079	-1.1769	VLTTPPQGAVIR	0	0	0	0	0	0	0	0	0	0	0	0	0	0	0	0	0	0	1168.1	0	0	0	0	0	0	0	0	0	0	0	0	0	0	0	0	0	0	0	0	0
A0A669CLZ8	High density lipoprotein binding protein b		Oreochromis niloticus (Nile tilapia) (Tilapia nilotica)			RNA binding [GO:0003723]	1.0041	-1.628	AIYEDKAK	0	0	0	0	0	0	0	0	0	0	0	0	0	0	0	0	0	0	0	0	0	0	0	0	1262.5	0	0	0	0	0	0	0	0	0	0	0	0	0	0	0
A0A669CM34	SLIT-ROBO Rho GTPase activating protein 2	srgap2	Oreochromis niloticus (Nile tilapia) (Tilapia nilotica)	signal transduction [GO:0007165]			1	-0.28417	EAEKQEEKQMGR	0	0	0	0	0	0	0	0	0	0	0	0	0	0	0	0	0	0	0	0	0	0	0	0	0	0	0	0	0	0	0	0	0	0	0	0	0	0	0	0
A0A669CM56	DENN domain containing 4C	dennd4c	Oreochromis niloticus (Nile tilapia) (Tilapia nilotica)		ESCRT I complex [GO:0000813]	guanyl-nucleotide exchange factor activity [GO:0005085]	1.0079	-1.3184	LSTGSFDGETGKGK	0	0	0	0	0	0	0	0	0	0	0	0	0	0	0	0	0	0	0	0	0	0	0	0	0	0	0	0	0	0	0	0	0	0	0	0	0	0	493.7	0
A0A669CM76	methylcrotonoyl-CoA carboxylase (EC 6.4.1.4) (3-methylcrotonyl-CoA carboxylase 2) (3-methylcrotonyl-CoA carboxylase non-biotin-containing subunit) (3-methylcrotonyl-CoA:carbon dioxide ligase subunit beta)		Oreochromis niloticus (Nile tilapia) (Tilapia nilotica)	leucine catabolic process [GO:0006552]		ligase activity [GO:0016874]	0.98802	-0.11354	KQEEELNRR	0	0	0	0	0	0	0	0	0	0	0	0	0	0	0	0	0	428.97	0	0	0	0	0	0	0	0	0	0	0	0	0	0	0	0	0	0	0	0	0	0
A0A669CMA0	NACHT, LRR and PYD domains-containing protein 3-like	LOC109200664	Oreochromis niloticus (Nile tilapia) (Tilapia nilotica)				1.011	-1.1741	VLSPDYR	0	0	0	0	0	0	0	0	0	0	0	0	0	0	0	0	0	0	0	0	0	0	0	0	0	0	0	0	0	0	0	0	0	0	0	0	0	0	0	0
A0A669CMC2	Olfactory receptor		Oreochromis niloticus (Nile tilapia) (Tilapia nilotica)		plasma membrane [GO:0005886]	G protein-coupled receptor activity [GO:0004930]; olfactory receptor activity [GO:0004984]	1.0041	-0.195	LKEISKHLQR	0	0	0	909.52	0	0	691.03	0	0	479.39	0	0	630.76	0	0	0	0	720.81	0	1106.9	1172.7	387.39	0	0	616.83	632.21	0	0	0	0	0	576.95	530.56	0	0	0	0	580.17	0	986.84
A0A669CMF0	Folylpolyglutamate synthase (EC 6.3.2.17) (Folylpoly-gamma-glutamate synthetase) (Tetrahydrofolylpolyglutamate synthase)	fpgs	Oreochromis niloticus (Nile tilapia) (Tilapia nilotica)	one-carbon metabolic process [GO:0006730]		ATP binding [GO:0005524]; metal ion binding [GO:0046872]; tetrahydrofolylpolyglutamate synthase activity [GO:0004326]	0.98621	-0.76167	RCLPGPR	0	0	0	0	0	0	0	0	0	0	0	0	0	0	0	0	0	0	0	0	0	0	0	0	0	0	0	0	0	0	0	0	0	0	0	0	0	0	0	0
A0A669CMH4	Uncharacterized protein		Oreochromis niloticus (Nile tilapia) (Tilapia nilotica)				1.0073	-0.91394	TNSFDILVNDK	0	0	4068.2	0	0	0	0	0	4654.1	0	0	2041.5	0	1408.1	1329.2	0	2182.2	0	2715.1	2924	0	0	2012.2	0	1613.2	0	1743.9	5313.7	5022	0	2366.5	2609.1	0	1865.4	0	1753.9	2884.4	0	0	2093.9
A0A669CMI9	Histidine triad nucleotide binding protein 3	hint3	Oreochromis niloticus (Nile tilapia) (Tilapia nilotica)			catalytic activity [GO:0003824]	0.99918	-2.4885	HVGNCKSLTK	0	0	0	0	0	0	0	0	0	0	0	0	0	0	0	0	0	0	0	0	0	682.67	0	0	0	0	0	0	0	0	0	0	0	0	0	0	0	0	0	0
A0A669CMJ7	SH3 and multiple ankyrin repeat domains 1		Oreochromis niloticus (Nile tilapia) (Tilapia nilotica)		cytoplasm [GO:0005737]; postsynaptic density [GO:0014069]		1.004	-0.96624	TVYQMALNK	0	0	0	0	0	0	0	0	0	0	0	0	0	0	0	0	0	0	0	0	0	0	0	0	0	0	0	0	0	0	0	0	0	0	0	0	0	0	0	0
A0A669CMJ9	Golgin A4	golga4	Oreochromis niloticus (Nile tilapia) (Tilapia nilotica)				1.0034	-2.0848	KEEELQKK	0	0	0	0	2790.3	0	0	0	0	2195.2	0	0	0	0	0	0	0	0	0	0	3016.5	0	0	0	0	0	0	0	0	0	0	0	0	0	0	0	0	0	0	0
A0A669CMQ8	NIMA related kinase 5	nek5	Oreochromis niloticus (Nile tilapia) (Tilapia nilotica)	protein phosphorylation [GO:0006468]	cytoplasm [GO:0005737]	ATP binding [GO:0005524]; protein kinase activity [GO:0004672]	1.0016	-1.0599	AFLVRDK	0	0	0	0	0	0	0	0	0	0	0	0	0	0	0	0	0	0	0	0	0	1561.5	1460.2	0	0	0	0	0	0	0	0	0	0	0	0	0	0	0	0	0
A0A669CN06	LIM domain only protein 7	LOC100710239	Oreochromis niloticus (Nile tilapia) (Tilapia nilotica)	regulation of cell adhesion [GO:0030155]; regulation of signaling [GO:0023051]			0.98647	-0.12802	VGTPSLGFPVISQTQVK	0	0	0	0	0	0	0	0	0	0	0	0	0	0	0	0	0	0	0	0	854.67	0	0	0	0	0	0	0	0	0	0	0	0	0	0	0	0	0	0	0
A0A669CN37	Multidrug resistance-associated protein 5	LOC100710139	Oreochromis niloticus (Nile tilapia) (Tilapia nilotica)		membrane [GO:0016020]	ABC-type transporter activity [GO:0140359]; ATP binding [GO:0005524]; ATP hydrolysis activity [GO:0016887]	0.99865	-1.0518	GPKRPGR	4219.8	4127.7	3769.2	5139.8	4870	5128	6412.1	5858	6413.8	4831.2	4502.2	4636.7	3983.4	3557.5	3592.8	3191.5	3219.3	2908.3	4402.9	3896.8	4478.4	2270.1	2596.5	2456.3	0	15957	15741	2705.7	2542.9	2558.3	3839.5	3214.5	3518.3	5344.3	5896.7	5193.1	2620.2	2268.6	2396.9	4030.3
A0A669CN58	Si:ch211-241f5.3		Oreochromis niloticus (Nile tilapia) (Tilapia nilotica)	animal organ development [GO:0048513]; cell surface receptor signaling pathway [GO:0007166]	plasma membrane [GO:0005886]	calcium ion binding [GO:0005509]; G protein-coupled receptor activity [GO:0004930]	1.0057	-1.4662	GNITLSTK	0	0	0	1399.2	0	0	0	0	0	0	0	0	0	0	0	0	0	0	0	0	0	0	0	0	3390	0	0	0	0	0	0	0	0	0	0	0	0	0	0	0
A0A669CNA1	60S ribosomal protein L8		Oreochromis niloticus (Nile tilapia) (Tilapia nilotica)	translation [GO:0006412]	ribonucleoprotein complex [GO:1990904]; ribosome [GO:0005840]	structural constituent of ribosome [GO:0003735]	0.99393	-0.33863	HRKGAAK	0	0	0	0	0	0	0	0	0	0	0	0	0	0	0	0	0	0	0	0	0	0	0	0	0	0	0	0	0	0	0	0	0	0	0	0	0	0	0	0
A0A669CNA9	Coiled-coil domain-containing protein 25	ccdc25	Oreochromis niloticus (Nile tilapia) (Tilapia nilotica)		endomembrane system [GO:0012505]; plasma membrane [GO:0005886]		0.98781	-0.72072	LSSAHVYLR	0	67451	0	0	0	0	0	0	0	0	0	0	0	0	0	54942	0	0	0	0	66450	0	0	0	0	0	0	0	0	0	0	0	0	55988	0	0	0	0	0	0
A0A669CNI1	Carbamoyl-phosphate synthetase 2, aspartate transcarbamylase, and dihydroorotase	cad	Oreochromis niloticus (Nile tilapia) (Tilapia nilotica)	'de novo' pyrimidine nucleobase biosynthetic process [GO:0006207]; glutamine metabolic process [GO:0006541]	membrane [GO:0016020]	ATP binding [GO:0005524]; carbamoyl-phosphate synthase (glutamine-hydrolyzing) activity [GO:0004088]; metal ion binding [GO:0046872]	0.99918	-2.5473	AGYTVEK	0	0	0	0	0	0	0	0	0	0	0	0	0	0	0	0	0	0	0	0	0	0	0	0	0	0	0	0	0	0	0	0	0	3420.6	0	0	0	0	0	0
A0A669CNM2	NACHT domain-containing protein		Oreochromis niloticus (Nile tilapia) (Tilapia nilotica)		membrane [GO:0016020]		0.99247	-0.63073	ELKSALKK	0	0	0	0	0	0	0	0	0	0	0	0	0	0	0	375.14	0	0	0	0	0	0	0	0	0	0	0	0	0	0	0	0	0	0	0	0	0	0	0	0
A0A669CNM3	RRM domain-containing protein		Oreochromis niloticus (Nile tilapia) (Tilapia nilotica)			RNA binding [GO:0003723]	1.004	-0.97329	VVIEHARGPR	0	0	0	0	0	0	0	0	0	0	0	0	0	0	0	0	0	0	0	0	0	0	0	0	0	0	0	0	0	0	0	0	0	0	0	0	0	0	0	0
A0A669CNP8	Ig-like domain-containing protein		Oreochromis niloticus (Nile tilapia) (Tilapia nilotica)		membrane [GO:0016020]		1.0055	-1.4662	FTISRDNSK	0	0	0	0	0	0	0	0	1628.8	0	0	0	0	0	0	0	0	0	0	0	0	0	0	0	0	0	0	0	0	0	0	0	0	0	0	0	0	0	0	0
A0A669CNQ8	Gamma-glutamylcyclotransferase (EC 4.3.2.7)	chac2	Oreochromis niloticus (Nile tilapia) (Tilapia nilotica)	glutathione catabolic process [GO:0006751]		gamma-glutamylcyclotransferase activity [GO:0003839]; glutathione specific gamma-glutamylcyclotransferase activity [GO:0061928]	1.0052	-1.4662	GVPGKPGR	0	0	0	0	0	0	0	0	0	0	0	0	0	0	0	0	0	0	0	0	0	0	0	0	0	0	0	0	0	0	0	0	0	0	0	0	0	0	0	0
A0A669CNS3	General vesicular transport factor p115	uso1	Oreochromis niloticus (Nile tilapia) (Tilapia nilotica)	intracellular protein transport [GO:0006886]; vesicle fusion with Golgi apparatus [GO:0048280]	Golgi membrane [GO:0000139]		1.0002	-1.9131	GNAAIQK	0	0	0	1109.1	0	0	0	0	0	0	1045.6	0	0	0	0	0	0	0	0	990.09	0	0	0	0	0	0	2512	574.61	0	0	0	0	0	1184.2	0	1199.8	0	0	0	0
A0A669CNV8	TCF3 fusion partner	tfpt	Oreochromis niloticus (Nile tilapia) (Tilapia nilotica)	apoptotic process [GO:0006915]			1.0112	-0.20905	ILGRLHQVQRITR	0	0	0	0	505.12	0	0	0	0	0	0	0	0	0	0	476.96	0	0	0	0	0	0	0	0	0	0	0	0	0	0	0	0	0	0	0	0	0	0	0	0
A0A669CNX8	Heterogeneous nuclear ribonucleoprotein U like 1	HNRNPUL1	Oreochromis niloticus (Nile tilapia) (Tilapia nilotica)		nucleus [GO:0005634]		0.99708	-6.1036	SGGFRGRGGGSFQR	0	0	0	0	0	0	0	0	0	0	0	0	0	0	0	0	0	0	0	0	0	0	0	0	0	0	0	0	0	0	0	0	0	0	0	0	0	0	0	0
A0A669CNY6	SWI/SNF-related matrix-associated actin-dependent regulator of chromatin subfamily B member 1		Oreochromis niloticus (Nile tilapia) (Tilapia nilotica)	chromatin remodeling [GO:0006338]	nuclear chromosome [GO:0000228]; SWI/SNF superfamily-type complex [GO:0070603]	DNA binding [GO:0003677]	0.99689	-6.204	AVSISTEPPAYLREQKAK	0	0	0	0	0	0	0	0	0	0	0	0	0	0	0	0	0	0	0	10932	0	0	0	0	0	0	0	0	0	0	0	0	0	0	0	0	0	0	0	0
A0A669CP45	ribonuclease H (EC 3.1.26.4)		Oreochromis niloticus (Nile tilapia) (Tilapia nilotica)	DNA integration [GO:0015074]		nucleic acid binding [GO:0003676]	0.99913	-1.9509	LKEGVLER	0	0	0	0	0	0	0	7512.5	0	0	0	0	0	3040.1	0	0	0	0	0	0	0	0	0	0	0	0	0	1986.4	0	0	0	0	0	0	0	0	646.97	0	733.67	0
A0A669CP51	DENN domain containing 2B		Oreochromis niloticus (Nile tilapia) (Tilapia nilotica)				0.98201	-0.42146	LLPTGKGPRLPEVYCVISR	0	0	0	0	0	0	0	0	0	0	0	0	0	0	0	0	0	0	0	0	0	0	0	0	0	0	0	0	1977	0	0	0	0	0	0	0	0	0	0	0
A0A669CPE5	Queuine tRNA-ribosyltransferase catalytic subunit 1 (EC 2.4.2.64) (Guanine insertion enzyme) (tRNA-guanine transglycosylase)	QTRT1	Oreochromis niloticus (Nile tilapia) (Tilapia nilotica)	tRNA-guanine transglycosylation [GO:0101030]	mitochondrial outer membrane [GO:0005741]	metal ion binding [GO:0046872]; queuine tRNA-ribosyltransferase activity [GO:0008479]	1.0007	-1.4466	ALSPLSLR	0	0	0	0	0	0	36973	35356	0	0	0	0	0	20448	0	0	0	16052	30059	0	0	0	0	0	0	0	0	0	0	0	0	0	0	0	0	0	0	0	0	0
A0A669CPE8	Nuclear factor 7, ovary	LOC100698263	Oreochromis niloticus (Nile tilapia) (Tilapia nilotica)	protein ubiquitination [GO:0016567]		ubiquitin-protein transferase activity [GO:0004842]; zinc ion binding [GO:0008270]	0.39706	0.11326	KGIILSGLWR	0	0	0	0	0	0	0	0	0	0	0	0	0	0	0	0	0	0	0	0	0	0	0	0	0	0	0	0	0	0	0	0	0	0	0	0	0	0	0	0
A0A669CPH4	Kinectin 1	ktn1	Oreochromis niloticus (Nile tilapia) (Tilapia nilotica)	microtubule-based movement [GO:0007018]; protein transport [GO:0015031]	endoplasmic reticulum membrane [GO:0005789]	kinesin binding [GO:0019894]	0.99608	-4.3443	TNRVESVMREQR	0	0	0	0	0	0	0	0	0	0	0	0	0	0	0	0	0	0	71535	0	0	0	0	0	0	0	0	0	0	0	0	0	0	0	0	0	0	0	0	0
A0A669CPK2	Galactose-3-O-sulfotransferase 4		Oreochromis niloticus (Nile tilapia) (Tilapia nilotica)	glycolipid biosynthetic process [GO:0009247]	membrane [GO:0016020]	galactosylceramide sulfotransferase activity [GO:0001733]	1.0064	-1.5137	MLPNLSLTDRQR	0	0	0	0	0	0	0	504.76	0	0	0	0	0	0	0	0	0	0	0	0	0	0	0	0	0	0	0	0	0	0	0	0	0	0	0	0	0	0	0	0
A0A669CPN0	Pseudouridine synthase 1	pus1	Oreochromis niloticus (Nile tilapia) (Tilapia nilotica)	tRNA pseudouridine synthesis [GO:0031119]	intracellular membrane-bounded organelle [GO:0043231]	pseudouridine synthase activity [GO:0009982]; RNA binding [GO:0003723]	1.005	-1.4662	VTQGFNSK	0	0	0	0	0	0	0	0	0	0	0	0	0	0	0	0	0	0	0	0	0	0	0	0	0	0	0	0	0	0	0	0	0	0	0	0	0	0	0	0
A0A669CPW3	CAP-Gly domain containing linker protein family member 4	clip4	Oreochromis niloticus (Nile tilapia) (Tilapia nilotica)				1.0114	-1.1741	ISKPLER	0	0	0	0	0	0	0	0	0	0	0	0	0	0	0	0	0	0	0	0	0	0	0	0	0	0	0	0	0	0	0	166990	0	0	0	0	0	0	0	0
A0A669CQ16	Lysine--tRNA ligase (Lysyl-tRNA synthetase)	kars1	Oreochromis niloticus (Nile tilapia) (Tilapia nilotica)	lysyl-tRNA aminoacylation [GO:0006430]	cytoplasm [GO:0005737]	ATP binding [GO:0005524]; lysine-tRNA ligase activity [GO:0004824]; nucleic acid binding [GO:0003676]	1.0066	-1.5752	GNPGKTK	962.38	1009.2	1016.9	1109.1	1217.5	1025.5	0	1459.5	1342.3	1015.5	1045.6	935.45	811.16	857.81	840.98	752.99	699.65	0	1046.1	990.09	0	0	0	0	3640	2359.8	2512	574.61	0	732.74	812.21	0	0	1184.2	0	1199.8	0	0	0	0
A0A669CQ17	Coiled-coil domain-containing protein 86		Oreochromis niloticus (Nile tilapia) (Tilapia nilotica)		nucleus [GO:0005634]		1.0024	-1.459	FSALVRDK	0	0	0	0	0	0	602.56	673.44	598.92	0	0	0	0	0	0	0	0	0	0	0	0	0	475.2	0	0	0	0	0	0	0	0	0	0	0	0	0	0	0	0	0
A0A669CQ47	Extracellular sulfatase Sulf-2	LOC100699999	Oreochromis niloticus (Nile tilapia) (Tilapia nilotica)		cell surface [GO:0009986]; endoplasmic reticulum [GO:0005783]; Golgi stack [GO:0005795]	calcium ion binding [GO:0005509]; sulfuric ester hydrolase activity [GO:0008484]	1.0112	-0.19531	NLREVKGHLK	0	1293.5	0	0	0	0	0	0	0	0	0	0	795.11	686.46	0	0	0	0	0	0	914.48	0	0	0	0	584.11	0	0	0	0	935.09	0	945.29	0	0	0	1107.9	0	0	0
A0A669CQS1	NADH dehydrogenase [ubiquinone] iron-sulfur protein 4, mitochondrial	ndufs4	Oreochromis niloticus (Nile tilapia) (Tilapia nilotica)	electron transport chain [GO:0022900]	mitochondrial inner membrane [GO:0005743]; respirasome [GO:0070469]		0.3913	0.11326	LDITTLTGVPEEHIKTRK	0	0	0	0	0	0	0	0	0	0	0	0	0	0	0	0	0	0	0	0	0	0	0	0	0	0	0	0	0	0	0	0	0	0	0	0	0	0	11507	0
A0A669CQU1	Uncharacterized protein		Oreochromis niloticus (Nile tilapia) (Tilapia nilotica)				1.0099	-0.26014	RLPLKHSSVK	0	0	0	0	0	0	0	0	0	0	0	0	0	0	0	0	0	0	0	0	0	0	0	0	0	0	0	0	0	0	0	0	0	0	0	0	0	0	0	0
A0A669CQV2	SWI/SNF related, matrix associated, actin dependent regulator of chromatin, subfamily a, member 5	smarca5	Oreochromis niloticus (Nile tilapia) (Tilapia nilotica)			ATP binding [GO:0005524]; ATP-dependent chromatin remodeler activity [GO:0140658]	1.004	-0.97329	EIKIYVGLSK	1227.4	0	1171.5	1290.3	1210	1206.7	0	0	1517.5	881.75	802.72	883.17	0	778.74	816.73	0	888.41	882.28	0	902.48	0	0	561.61	540.63	563.14	543.62	0	938.12	981.94	976.88	1050.7	909.71	0	0	690.9	756.22	1300.8	1189.5	1233.5	1652.6
A0A669CQV6	Remodeling and spacing factor 1	LOC100697452	Oreochromis niloticus (Nile tilapia) (Tilapia nilotica)	regulation of DNA-templated transcription [GO:0006355]	RSF complex [GO:0031213]	metal ion binding [GO:0046872]	0	0.28957	KTAKTPPGK	0	0	0	0	0	0	474.2	0	0	0	0	0	0	0	0	0	0	0	0	0	0	0	0	0	0	0	0	0	0	0	0	0	0	0	0	0	0	0	0	0
A0A669CR04	Leucine rich repeat containing G protein-coupled receptor 4	lgr4	Oreochromis niloticus (Nile tilapia) (Tilapia nilotica)		membrane [GO:0016020]	G protein-coupled receptor activity [GO:0004930]	1.0007	-1.8813	EDWLRLR	0	0	0	0	0	0	0	0	0	0	0	0	0	0	0	0	0	0	0	0	0	0	0	0	0	0	0	0	0	0	0	0	625.9	0	0	0	0	0	0	0
A0A669CR26	ribonuclease H (EC 3.1.26.4)		Oreochromis niloticus (Nile tilapia) (Tilapia nilotica)	DNA integration [GO:0015074]		nucleic acid binding [GO:0003676]	1.0048	-0.96285	ELLAVVFACYR	0	0	0	0	0	0	0	0	0	0	0	0	0	0	0	0	0	0	0	0	0	0	0	0	0	0	0	0	0	0	0	0	0	0	0	0	0	0	0	0
A0A669CR48	Contactin 2		Oreochromis niloticus (Nile tilapia) (Tilapia nilotica)		membrane [GO:0016020]		1.0068	-1.5548	LLLLLCCCRAEQWAR	0	0	0	0	0	0	0	0	0	0	0	0	0	0	0	0	0	0	0	0	0	590.61	0	0	0	0	0	0	0	0	0	0	0	0	0	0	0	0	0	0
A0A669CRD2	SRCR domain-containing protein		Oreochromis niloticus (Nile tilapia) (Tilapia nilotica)		membrane [GO:0016020]	scavenger receptor activity [GO:0005044]	1.0091	-1.3439	SLLRTLLK	0	0	591.87	0	0	0	0	0	0	0	0	0	0	0	0	0	0	619.48	0	0	0	0	0	0	0	0	0	0	0	0	0	482.21	0	0	0	0	0	0	0	0
A0A669CRF2	phosphatidylinositol-3,4,5-trisphosphate 5-phosphatase (EC 3.1.3.86)	inppl1	Oreochromis niloticus (Nile tilapia) (Tilapia nilotica)	immune system process [GO:0002376]; phosphatidylinositol dephosphorylation [GO:0046856]	cytoskeleton [GO:0005856]; membrane [GO:0016020]	phosphatase activity [GO:0016791]	1.0037	-1.3499	AAAEELLAR	990.55	0	0	0	0	0	0	0	0	0	0	0	0	0	0	0	0	0	0	0	0	0	0	0	0	0	0	0	0	0	0	0	0	0	0	0	0	0	0	0
A0A669CRH6	Zinc finger protein 292a		Oreochromis niloticus (Nile tilapia) (Tilapia nilotica)				0.98902	-0.6496	SLGGHLSKR	0	0	0	0	0	0	0	0	0	0	0	0	0	0	0	0	0	0	0	0	0	0	0	0	0	0	0	0	0	0	0	0	0	0	0	0	0	0	0	0
A0A669CRM1	5-oxoprolinase, ATP-hydrolysing	oplah	Oreochromis niloticus (Nile tilapia) (Tilapia nilotica)			hydrolase activity [GO:0016787]	0.98833	-0.11515	NKVVLSVLTERR	0	0	0	0	777.67	0	0	0	0	0	335.67	0	394.94	0	0	0	0	0	0	0	0	0	0	0	0	0	397.47	0	0	0	0	0	0	0	0	0	0	0	0	0
A0A669CRN7	Dual specificity phosphatase 10		Oreochromis niloticus (Nile tilapia) (Tilapia nilotica)	protein dephosphorylation [GO:0006470]		MAP kinase tyrosine/serine/threonine phosphatase activity [GO:0017017]; myosin phosphatase activity [GO:0017018]	1.0074	-1.2579	GGLSSFR	0	434.89	0	0	0	0	523.75	0	0	0	0	0	0	0	0	0	0	0	0	502.03	0	0	393.28	0	0	0	0	0	0	0	0	0	0	0	0	0	0	0	555.15	0
A0A669CRY5	Alpha-1,4 glucan phosphorylase (EC 2.4.1.1)	pygl	Oreochromis niloticus (Nile tilapia) (Tilapia nilotica)	glycogen metabolic process [GO:0005977]		glycogen phosphorylase activity [GO:0008184]; linear malto-oligosaccharide phosphorylase activity [GO:0102250]; pyridoxal phosphate binding [GO:0030170]; SHG alpha-glucan phosphorylase activity [GO:0102499]	1	-2.518	INPASMFDVHVK	0	0	0	0	0	0	0	0	0	0	0	0	0	0	0	0	0	0	0	0	0	0	0	0	0	0	0	0	0	0	0	0	0	0	0	0	0	0	0	0
A0A669CS22	FYVE, RhoGEF and PH domain-containing protein 6	LOC100712554	Oreochromis niloticus (Nile tilapia) (Tilapia nilotica)		cytoplasm [GO:0005737]; cytoskeleton [GO:0005856]	guanyl-nucleotide exchange factor activity [GO:0005085]; metal ion binding [GO:0046872]	1.0004	-2.4219	GKPQRQK	0	0	0	0	0	0	0	0	0	0	0	0	0	0	0	0	0	0	0	0	0	0	0	0	0	0	0	0	0	0	0	0	0	0	0	0	0	0	0	0
A0A669CS33	SRSF protein kinase 3	SRPK3	Oreochromis niloticus (Nile tilapia) (Tilapia nilotica)	protein phosphorylation [GO:0006468]	cytoplasm [GO:0005737]	ATP binding [GO:0005524]; protein kinase activity [GO:0004672]	0.99369	-0.82529	ISWRESNSK	0	0	0	0	0	0	0	0	0	0	0	0	0	0	0	0	0	0	0	0	0	0	0	1620.2	0	0	0	0	0	0	0	0	0	0	0	0	0	0	0	0
A0A669CSB4	N-acetylglucosamine kinase	nagk	Oreochromis niloticus (Nile tilapia) (Tilapia nilotica)	meiosis I [GO:0007127]; spermatogenesis [GO:0007283]			0.99629	-0.17093	IPLLSLYAVSRQR	0	0	0	746.63	0	0	0	0	0	0	0	0	0	0	0	0	0	0	0	2042.9	2039.8	0	0	0	0	0	0	0	0	0	0	0	0	0	0	0	0	0	0	0
A0A669CSE7	Inositol 1,4,5-trisphosphate receptor		Oreochromis niloticus (Nile tilapia) (Tilapia nilotica)		endoplasmic reticulum membrane [GO:0005789]	inositol 1,4,5 trisphosphate binding [GO:0070679]; inositol 1,4,5-trisphosphate-sensitive calcium-release channel activity [GO:0005220]	1.007	-0.89272	ANEKLENGESSENR	0	0	0	0	0	0	0	0	0	0	0	0	0	0	0	0	0	0	0	0	0	0	0	0	0	0	0	0	0	0	0	0	0	0	0	0	0	0	0	0
A0A669CSE8	Protein tyrosine phosphatase receptor type N2	ptprn2	Oreochromis niloticus (Nile tilapia) (Tilapia nilotica)	protein dephosphorylation [GO:0006470]	secretory granule [GO:0030141]; synapse [GO:0045202]; transport vesicle membrane [GO:0030658]	protein tyrosine phosphatase activity [GO:0004725]	0.99415	-2.8131	NIFKTAAL	0	0	0	0	0	0	0	0	0	0	0	0	0	0	0	0	0	0	0	0	0	0	0	0	2381.2	0	0	0	0	0	0	0	0	0	0	0	0	0	0	0
A0A669CSF1	receptor protein-tyrosine kinase (EC 2.7.10.1)	LOC100700380	Oreochromis niloticus (Nile tilapia) (Tilapia nilotica)	anatomical structure development [GO:0048856]; protein phosphorylation [GO:0006468]	plasma membrane [GO:0005886]	ATP binding [GO:0005524]; ephrin receptor activity [GO:0005003]	0.9969	-1.8137	GGKIPIR	0	0	8790.3	0	0	0	0	0	0	2896.1	3502.8	0	0	0	0	0	0	0	0	0	0	0	0	0	0	0	0	0	7641.9	0	0	0	0	0	355.81	0	0	0	0	0
A0A669CSF4	B30.2/SPRY domain-containing protein		Oreochromis niloticus (Nile tilapia) (Tilapia nilotica)				1.0093	-1.1741	LSPIEFK	0	0	0	0	0	0	0	0	0	0	0	0	0	0	0	0	0	0	0	0	0	480.34	0	0	0	0	0	0	0	0	0	753.73	0	0	0	0	0	0	0	0
A0A669CSF8	Ribosomal protein S11	rps11	Oreochromis niloticus (Nile tilapia) (Tilapia nilotica)	translation [GO:0006412]	ribonucleoprotein complex [GO:1990904]; ribosome [GO:0005840]	structural constituent of ribosome [GO:0003735]	1.0029	-0.97329	ILSGVVTKMK	0	0	0	0	0	0	0	0	0	0	0	0	0	0	0	0	0	0	0	0	0	0	0	0	0	0	0	0	0	0	0	0	0	0	0	0	0	0	0	0
A0A669CSJ9	non-specific serine/threonine protein kinase (EC 2.7.11.1)		Oreochromis niloticus (Nile tilapia) (Tilapia nilotica)	protein phosphorylation [GO:0006468]; regulation of signal transduction [GO:0009966]	cytosol [GO:0005829]; membrane [GO:0016020]	ATP binding [GO:0005524]; GTP binding [GO:0005525]; protein serine/threonine kinase activity [GO:0004674]	0.99262	-0.33732	HSKKHIVLAPLTK	0	0	0	0	0	0	0	0	0	0	0	0	0	0	0	0	0	0	0	0	0	0	0	0	0	0	0	0	0	0	0	0	0	0	0	0	0	0	0	0
A0A669CSN8	Olfactory receptor		Oreochromis niloticus (Nile tilapia) (Tilapia nilotica)		plasma membrane [GO:0005886]	G protein-coupled receptor activity [GO:0004930]; olfactory receptor activity [GO:0004984]	1	-2.425	LYCESPR	0	0	0	0	0	0	0	0	0	0	0	0	0	0	0	0	0	0	0	0	1555.1	0	0	0	0	0	0	3586.7	0	0	0	0	0	0	0	0	0	5077.1	0	0
A0A669CSP0	Zinc finger and BTB domain containing 4	zbtb4	Oreochromis niloticus (Nile tilapia) (Tilapia nilotica)				0.98998	-0.63716	VEGGMIVGETDISK	0	0	0	0	0	0	0	0	0	0	0	0	0	0	0	0	0	0	0	0	0	704.24	0	666.29	0	0	0	0	0	0	0	0	0	0	0	0	0	0	0	0
A0A669CSW7	Tubulin alpha chain	LOC109197098	Oreochromis niloticus (Nile tilapia) (Tilapia nilotica)	microtubule-based process [GO:0007017]	cytoplasm [GO:0005737]; microtubule [GO:0005874]	GTP binding [GO:0005525]; hydrolase activity [GO:0016787]; structural constituent of cytoskeleton [GO:0005200]	0.98936	-0.03052	LIGQIVSSITASLR	0	0	0	0	0	0	0	0	0	0	0	0	0	0	0	0	0	0	0	0	0	0	0	0	0	0	0	0	0	0	0	0	0	0	0	0	0	0	0	0
A0A669CT54	Golgin B1		Oreochromis niloticus (Nile tilapia) (Tilapia nilotica)		Golgi apparatus [GO:0005794]; membrane [GO:0016020]		1.0029	-0.9824	DWQLRLEEK	0	0	0	0	0	0	0	20977	0	0	0	0	0	0	0	0	0	0	0	0	0	0	0	0	0	0	0	0	0	0	0	0	0	0	0	0	0	0	0	0
A0A669CTB5	RAS guanyl releasing protein 3 (calcium and DAG-regulated)		Oreochromis niloticus (Nile tilapia) (Tilapia nilotica)	cell development [GO:0048468]; small GTPase mediated signal transduction [GO:0007264]		calcium ion binding [GO:0005509]; guanyl-nucleotide exchange factor activity [GO:0005085]	0.98736	-0.59839	LKETHLYLAPEVVK	0	0	0	0	0	0	0	0	0	0	0	0	0	0	0	0	0	0	0	0	0	0	0	0	0	0	0	0	0	0	0	0	0	0	0	0	0	0	0	0
A0A669CTD4	Reverse transcriptase domain-containing protein		Oreochromis niloticus (Nile tilapia) (Tilapia nilotica)				1.007	-1.2185	ALRSSNQGLLMQPMS	0	0	0	0	0	0	0	0	0	0	0	0	0	0	0	0	0	0	0	0	0	0	0	0	0	0	0	0	0	0	0	0	0	0	0	0	0	0	0	0
A0A669CTH3	Protein tyrosine phosphatase non-receptor type 9b		Oreochromis niloticus (Nile tilapia) (Tilapia nilotica)	protein dephosphorylation [GO:0006470]		protein tyrosine phosphatase activity [GO:0004725]	1.0132	-1.1741	FTVLPGR	0	0	0	0	0	0	0	0	0	0	0	0	0	0	0	0	0	0	0	0	0	0	0	0	0	0	0	0	0	0	0	0	0	0	0	0	0	5077.1	0	0
A0A669CTK3	Peptidase S1 domain-containing protein		Oreochromis niloticus (Nile tilapia) (Tilapia nilotica)	proteolysis [GO:0006508]		serine-type endopeptidase activity [GO:0004252]	1.0097	-1.1524	LYDDAVTPR	0	0	0	0	0	0	0	0	0	0	0	0	0	0	0	0	0	0	0	0	0	0	0	0	0	0	0	0	0	0	0	0	0	0	0	0	0	0	0	0
A0A669CTP0	Hedgehog protein	dhh	Oreochromis niloticus (Nile tilapia) (Tilapia nilotica)	cell-cell signaling [GO:0007267]; intein-mediated protein splicing [GO:0016539]; protein autoprocessing [GO:0016540]; system development [GO:0048731]	endoplasmic reticulum membrane [GO:0005789]; extracellular space [GO:0005615]; Golgi membrane [GO:0000139]; plasma membrane [GO:0005886]	metal ion binding [GO:0046872]; peptidase activity [GO:0008233]; transferase activity [GO:0016740]	0.98931	-0.63073	KLTAMRLK	0	0	0	0	0	0	0	0	0	0	0	0	0	0	0	0	0	0	0	0	0	0	0	0	0	0	0	0	0	0	0	0	0	0	0	0	0	0	0	0
A0A669CTU6	Immunoglobulin superfamily member 11	LOC100710403	Oreochromis niloticus (Nile tilapia) (Tilapia nilotica)		membrane [GO:0016020]		1.0014	-1.4662	VSDAGIYR	0	0	0	0	0	0	0	0	0	0	0	0	0	0	0	0	0	0	0	0	0	0	0	0	0	0	0	0	0	0	0	0	0	0	0	0	0	0	0	0
A0A669CTV7	FK506-binding protein-like	LOC100712111	Oreochromis niloticus (Nile tilapia) (Tilapia nilotica)				1.0102	-1.3439	LNQPERAK	0	0	0	0	0	0	0	0	0	0	0	0	0	0	0	0	0	0	0	0	0	0	0	856.72	0	0	0	0	0	0	0	0	0	0	0	0	0	0	0	0
A0A669CTY7	RNA binding motif protein 5	rbm5	Oreochromis niloticus (Nile tilapia) (Tilapia nilotica)		nucleus [GO:0005634]	metal ion binding [GO:0046872]; RNA binding [GO:0003723]	0.99896	-2.2639	NLEVLRR	0	0	0	0	0	0	0	0	0	0	0	0	0	0	0	0	0	0	0	0	0	0	0	0	0	0	0	0	0	0	0	0	0	0	0	0	0	0	0	0
A0A669CU58	B box-type domain-containing protein		Oreochromis niloticus (Nile tilapia) (Tilapia nilotica)			zinc ion binding [GO:0008270]	1.0014	-1.0301	EKLGGCSVR	0	0	0	0	0	0	0	0	0	0	0	0	0	0	0	0	0	0	0	0	0	0	0	0	0	0	0	0	0	0	0	0	0	0	0	0	0	0	0	0
A0A669CUC5	Tyrosine-protein kinase (EC 2.7.10.2)		Oreochromis niloticus (Nile tilapia) (Tilapia nilotica)	protein phosphorylation [GO:0006468]		ATP binding [GO:0005524]; non-membrane spanning protein tyrosine kinase activity [GO:0004715]	0.99301	-0.31697	QLKHDRLVR	0	0	0	0	0	0	0	0	0	0	0	0	0	0	0	0	0	0	0	0	0	0	0	0	0	0	0	0	0	0	0	0	0	0	0	0	0	0	3352.8	0
A0A669CUF4	BCAS3 microtubule associated cell migration factor	bcas3	Oreochromis niloticus (Nile tilapia) (Tilapia nilotica)	autophagy [GO:0006914]			0.99898	-1.0518	EKIIWVR	3580.4	3490.4	3410.5	0	3885	3947.9	4355.5	0	3835.5	3919.5	3578.1	3782.4	2932.3	0	0	2982.9	3035.8	2804.5	3931.4	3283.5	3530.9	2052.4	2021.1	1975.7	8553.2	0	8749.9	2386.7	2420.2	2470.8	0	3016.5	3180	3764.9	3998.5	3582	2795	2561.5	2716.7	3514.7
A0A669CUK0	Collagen, type XII, alpha 1a		Oreochromis niloticus (Nile tilapia) (Tilapia nilotica)		collagen trimer [GO:0005581]; extracellular region [GO:0005576]		0.99803	-3.6342	GARQNVPR	0	795.61	0	0	0	0	0	0	0	0	0	0	0	0	0	0	0	0	0	0	0	0	0	0	0	0	0	0	0	0	0	0	0	0	0	0	0	0	0	0
A0A669CUU3	Vacuolar protein sorting 13 homolog D		Oreochromis niloticus (Nile tilapia) (Tilapia nilotica)	lipid transport [GO:0006869]		DNA binding [GO:0003677]	0.99117	-0.34148	RLLCLTIRIILR	0	0	0	0	0	0	0	0	0	3735.7	931.94	0	0	0	0	0	0	0	0	0	0	0	0	0	0	0	932.2	0	0	0	0	0	0	767.57	0	859.23	0	0	0	0
A0A669CUX5	Homeobox protein engrailed-like	LOC100706716	Oreochromis niloticus (Nile tilapia) (Tilapia nilotica)	cell differentiation [GO:0030154]; nervous system development [GO:0007399]	nucleus [GO:0005634]	DNA binding [GO:0003677]; DNA-binding transcription factor activity, RNA polymerase II-specific [GO:0000981]	0.98667	-0.76167	KDGGANR	0	0	0	0	0	0	0	0	0	0	0	0	0	0	0	0	0	0	0	0	0	1209.3	0	0	0	0	0	0	0	0	0	0	0	0	0	0	0	0	0	0
A0A669CUZ3	PDZ and LIM domain 7		Oreochromis niloticus (Nile tilapia) (Tilapia nilotica)	animal organ development [GO:0048513]		metal ion binding [GO:0046872]	1.004	-0.97144	YAPNCAKCK	0	0	0	0	0	0	0	0	0	0	0	0	0	0	0	0	0	0	0	0	0	0	0	26480	0	0	0	0	0	0	0	0	0	0	0	0	1209.3	0	0	0
A0A669CV47	DNA topoisomerase 2 (EC 5.6.2.2)	top2a	Oreochromis niloticus (Nile tilapia) (Tilapia nilotica)	DNA topological change [GO:0006265]	nucleus [GO:0005634]	ATP binding [GO:0005524]; DNA binding [GO:0003677]; DNA topoisomerase type II (double strand cut, ATP-hydrolyzing) activity [GO:0003918]; metal ion binding [GO:0046872]	0.98293	-0.45515	KDWLAGMLGAESAK	0	0	0	0	0	0	0	0	0	0	0	0	0	0	0	0	0	0	0	0	0	0	0	0	0	0	0	0	0	0	0	0	0	0	0	0	0	0	0	0
A0A669CV71	Eukaryotic translation initiation factor 3 subunit A (eIF3a) (Eukaryotic translation initiation factor 3 subunit 10) (eIF-3-theta)	eif3a EIF3A EIF3S10	Oreochromis niloticus (Nile tilapia) (Tilapia nilotica)	formation of cytoplasmic translation initiation complex [GO:0001732]	eukaryotic 43S preinitiation complex [GO:0016282]; eukaryotic 48S preinitiation complex [GO:0033290]; eukaryotic translation initiation factor 3 complex [GO:0005852]	RNA binding [GO:0003723]; translation initiation factor activity [GO:0003743]	1.0048	-0.95264	EYQERLR	0	0	0	0	0	0	0	2429.4	0	0	0	0	0	0	0	0	0	0	0	0	0	0	0	0	0	0	0	0	0	0	0	0	0	0	0	0	0	0	0	0
A0A669CV76	ribonuclease H (EC 3.1.26.4)		Oreochromis niloticus (Nile tilapia) (Tilapia nilotica)			nucleic acid binding [GO:0003676]; zinc ion binding [GO:0008270]	0.99631	-7.2629	AVTEAVSTAFSIDCK	0	0	0	0	0	0	0	0	0	0	0	0	0	0	0	0	0	0	0	0	0	0	353.54	0	0	0	0	0	0	0	0	0	0	0	0	0	0	0	0	0
A0A669CVB1	SH3 domain-binding protein 5 (SH3BP-5)		Oreochromis niloticus (Nile tilapia) (Tilapia nilotica)	intracellular signal transduction [GO:0035556]	cytoplasm [GO:0005737]	guanyl-nucleotide exchange factor activity [GO:0005085]; SH3 domain binding [GO:0017124]	0.99863	-1.0518	GAVNKEK	1169	0	0	0	0	0	0	0	0	0	0	0	0	0	0	0	0	0	0	0	0	0	0	0	0	0	0	0	0	0	0	0	0	0	0	0	0	0	0	0
A0A669CVJ7	Zinc finger and BTB domain containing 3	zbtb3	Oreochromis niloticus (Nile tilapia) (Tilapia nilotica)				1.0057	-1.1103	TLSLRAPPQIR	0	0	0	0	0	820.02	0	0	649.1	479.39	0	468.75	630.76	0	538.9	0	0	0	0	1106.9	0	0	0	0	0	0	0	0	0	0	0	0	530.56	0	0	0	641.88	0	0	0
A0A669CVL5	TIAM Rac1 associated GEF 2	tiam2	Oreochromis niloticus (Nile tilapia) (Tilapia nilotica)	activation of GTPase activity [GO:0090630]; small GTPase mediated signal transduction [GO:0007264]		guanyl-nucleotide exchange factor activity [GO:0005085]	1.0084	-1.2716	FSDWTGSLSR	0	0	0	0	0	0	0	0	0	0	0	0	0	0	0	0	0	0	0	0	0	0	0	0	0	0	0	0	0	0	0	0	0	0	0	0	0	0	0	0
A0A669CVP6	Zinc finger protein 219	LOC102080858	Oreochromis niloticus (Nile tilapia) (Tilapia nilotica)				1.0106	-0.26014	EHRKALAALR	0	0	0	0	0	0	0	0	0	0	0	0	3093.1	0	0	0	0	0	0	0	0	0	0	0	0	0	0	0	0	0	0	0	0	0	0	0	0	0	0	0
A0A669CVS3	Linkage group 16 C2orf80 homolog	lg16h2orf80	Oreochromis niloticus (Nile tilapia) (Tilapia nilotica)				0.9967	-7.0082	ASTPPKQVSSSFSTSSQSFISK	0	0	0	0	0	0	0	0	0	0	0	0	0	0	0	0	0	0	0	0	0	0	0	2280.9	0	0	0	0	0	0	0	0	0	0	0	0	0	0	0	0
A0A669CVV9	RNA helicase (EC 3.6.4.13)		Oreochromis niloticus (Nile tilapia) (Tilapia nilotica)		membrane [GO:0016020]	ATP binding [GO:0005524]; hydrolase activity [GO:0016787]; nucleic acid binding [GO:0003676]; RNA helicase activity [GO:0003724]	0.99845	-1.7735	DRHGDDRGR	0	0	0	0	0	0	0	0	0	0	0	0	0	0	0	0	0	0	0	0	0	0	0	0	0	458.74	0	1098.4	0	566.67	0	0	0	0	0	0	0	0	0	0
A0A669CW17	[histone H3]-trimethyl-L-lysine(9) demethylase (EC 1.14.11.66)	kdm4a	Oreochromis niloticus (Nile tilapia) (Tilapia nilotica)		nucleus [GO:0005634]	histone H3K9me2/H3K9me3 demethylase activity [GO:0140684]; metal ion binding [GO:0046872]	1.0024	-1.4662	LYLQFLNV	0	0	0	0	0	0	0	0	0	0	0	0	0	0	0	0	0	0	528.2	0	0	0	0	0	0	0	0	0	0	0	0	0	0	0	0	0	0	0	0	0
A0A669CW45	Tripartite motif-containing protein 16	LOC100708751	Oreochromis niloticus (Nile tilapia) (Tilapia nilotica)			zinc ion binding [GO:0008270]	0.037037	0.1384	MFEDMIR	0	0	0	0	0	0	0	0	0	0	0	0	0	0	0	0	0	0	0	0	0	0	0	1387	0	0	0	0	0	0	0	0	0	0	0	0	0	0	0	0
A0A669CW46	CDK5 regulatory subunit associated protein 1	CDK5RAP1	Oreochromis niloticus (Nile tilapia) (Tilapia nilotica)	tRNA modification [GO:0006400]		4 iron, 4 sulfur cluster binding [GO:0051539]; metal ion binding [GO:0046872]; methylthiotransferase activity [GO:0035596]	1.0071	-0.042162	FSDLLDQVSR	0	0	0	0	0	0	0	0	0	0	0	0	0	0	0	0	0	0	0	0	4188.3	0	0	0	0	0	0	0	0	0	0	0	3611.6	0	0	0	0	0	0	0
A0A669CWB4	Alkylglycerone-phosphate synthase (Alkyl-DHAP synthase) (EC 2.5.1.26)	agps	Oreochromis niloticus (Nile tilapia) (Tilapia nilotica)	ether lipid biosynthetic process [GO:0008611]	peroxisome [GO:0005777]	alkylglycerone-phosphate synthase activity [GO:0008609]; FAD binding [GO:0071949]	0.9791	-0.39773	TFKSNPKK	0	0	0	0	0	0	0	0	0	0	0	0	0	0	0	0	0	0	0	0	0	0	0	3294.8	0	0	0	0	0	0	0	0	0	0	0	0	0	0	0	0
A0A669CWD3	TBC1 domain family member 32	tbc1d32	Oreochromis niloticus (Nile tilapia) (Tilapia nilotica)				1.0066	-1.2357	KYKSVVSGLLNNK	1227.7	0	993.51	0	0	0	1686	1553.8	1489.4	0	0	0	0	0	0	0	0	0	467.02	0	0	473.45	0	0	0	0	0	695.15	0	0	868.93	0	0	0	0	0	0	0	0	0
A0A669CWE7	Ring finger protein 220a		Oreochromis niloticus (Nile tilapia) (Tilapia nilotica)				0.99112	-0.31697	LLPQPLRRR	0	0	0	0	0	0	0	0	0	0	0	0	0	0	0	0	0	0	0	0	0	396.42	0	0	0	0	0	0	0	0	0	0	0	0	0	0	0	366.58	0	0
A0A669CWI0	C2H2-type domain-containing protein		Oreochromis niloticus (Nile tilapia) (Tilapia nilotica)				0.99076	-0.72299	QFSTSSSLK	0	0	0	0	0	0	0	0	0	0	0	0	0	0	0	0	0	0	0	0	0	0	0	0	0	0	0	0	0	0	0	0	0	0	0	0	0	0	0	0
A0A669CWJ2	Pumilio RNA binding family member 1	pum1	Oreochromis niloticus (Nile tilapia) (Tilapia nilotica)			RNA binding [GO:0003723]	1.0017	-1.4662	FASNVVEK	0	0	0	0	0	0	0	0	0	0	0	0	0	0	0	0	0	0	0	0	0	0	0	0	0	0	0	0	0	0	0	0	0	0	0	0	0	0	0	0
A0A669CWJ9	Transmembrane channel-like protein		Oreochromis niloticus (Nile tilapia) (Tilapia nilotica)		plasma membrane [GO:0005886]		1.0021	-2.1836	EAIVEEQEK	0	0	0	0	0	0	0	0	0	0	0	0	0	0	0	0	304.95	0	1081	0	0	0	0	0	0	0	0	0	0	0	0	0	0	0	0	0	0	0	0	0
A0A669CWP8	Phospholipid-transporting ATPase (EC 7.6.2.1)	LOC102076730	Oreochromis niloticus (Nile tilapia) (Tilapia nilotica)	phospholipid transport [GO:0015914]	membrane [GO:0016020]	ATP binding [GO:0005524]; ATP hydrolysis activity [GO:0016887]; ATPase-coupled intramembrane lipid transporter activity [GO:0140326]; magnesium ion binding [GO:0000287]	1.0121	-0.24327	FIFIQLRPTINDKVKR	0	0	0	0	0	0	0	0	0	0	0	0	0	0	0	0	0	0	0	0	0	0	0	0	0	0	0	0	0	0	0	0	0	0	0	0	0	0	0	0
A0A669CWT7	PBX homeobox interacting protein 1	pbxip1	Oreochromis niloticus (Nile tilapia) (Tilapia nilotica)				0.99783	-3.6811	DKSQFQK	0	0	0	0	0	0	0	0	0	0	0	0	0	0	0	0	0	0	0	0	0	0	0	0	0	0	0	0	934.02	0	0	1208.4	0	0	0	1825.4	0	0	0	0
A0A669CWV4	VPS54 subunit of GARP complex	vps54	Oreochromis niloticus (Nile tilapia) (Tilapia nilotica)	protein transport [GO:0015031]; retrograde transport, endosome to Golgi [GO:0042147]	cytosol [GO:0005829]; GARP complex [GO:0000938]		1.0066	-1.596	NVVLEVLDSNQK	0	0	0	0	0	0	0	0	0	0	0	0	0	0	0	0	0	0	0	0	419.04	0	0	0	0	0	0	0	0	0	0	0	0	0	0	0	0	0	0	0
A0A669CWX0	Serine/threonine-protein phosphatase (EC 3.1.3.16)	LOC100700735	Oreochromis niloticus (Nile tilapia) (Tilapia nilotica)	detection of stimulus involved in sensory perception [GO:0050906]		calcium ion binding [GO:0005509]; iron ion binding [GO:0005506]; manganese ion binding [GO:0030145]; myosin phosphatase activity [GO:0017018]	1.0053	-1.3439	LGRELVPR	0	0	0	0	0	0	0	0	0	0	0	0	0	0	0	0	0	0	0	0	0	1468	0	0	0	0	0	0	0	0	0	0	0	0	0	0	0	0	0	0
A0A669CXC4	Serine/threonine-protein kinase BRSK2	LOC100696207	Oreochromis niloticus (Nile tilapia) (Tilapia nilotica)	protein phosphorylation [GO:0006468]	cytoplasm [GO:0005737]	ATP binding [GO:0005524]; protein kinase activity [GO:0004672]	0.99146	-0.80445	ENGIYSVTFTLLSGPSR	0	0	0	0	0	0	0	0	0	0	0	0	0	0	0	0	0	0	0	0	0	0	0	0	0	0	0	0	0	0	0	0	0	0	0	0	0	0	0	0
A0A669CXE6	HAT C-terminal dimerisation domain-containing protein		Oreochromis niloticus (Nile tilapia) (Tilapia nilotica)			protein dimerization activity [GO:0046983]	1.005	-0.90996	APSYLNDLVYDR	0	0	0	0	0	0	878.97	774.15	869.65	0	0	0	0	0	0	0	0	0	333.45	0	0	872.04	929.79	1005.7	0	0	0	0	0	587.53	0	0	0	0	0	0	0	0	0	0
A0A669CXK4	CaM kinase-like vesicle-associated a		Oreochromis niloticus (Nile tilapia) (Tilapia nilotica)	protein phosphorylation [GO:0006468]		ATP binding [GO:0005524]; protein kinase activity [GO:0004672]	0.99166	-0.82927	IVISDFQLAK	0	0	0	0	0	0	0	0	0	0	0	0	0	0	0	0	0	0	0	0	0	0	0	0	0	0	0	0	0	0	0	0	0	0	0	0	0	0	0	0
A0A669CXP6	NACHT and WD repeat domain containing 2		Oreochromis niloticus (Nile tilapia) (Tilapia nilotica)				1.0033	-0.97329	FLATTLRSIK	0	0	0	0	0	0	0	0	0	0	0	0	0	0	0	0	0	0	0	0	0	0	0	0	0	0	0	0	0	0	0	0	0	0	0	0	0	0	0	0
A0A669CXS6	Telomerase reverse transcriptase (EC 2.7.7.49) (Telomerase catalytic subunit)	tert	Oreochromis niloticus (Nile tilapia) (Tilapia nilotica)		chromosome, telomeric region [GO:0000781]; nucleus [GO:0005634]; ribonucleoprotein complex [GO:1990904]	DNA binding [GO:0003677]; metal ion binding [GO:0046872]; telomerase RNA reverse transcriptase activity [GO:0003721]	0.99227	-0.33863	TRLYRGR	0	0	0	0	0	0	0	0	0	0	0	0	0	0	0	0	0	0	0	0	0	0	0	0	0	0	0	0	0	0	0	0	0	0	0	0	0	0	0	0
A0A669CXV9	Uncharacterized LOC102076116	LOC102076116	Oreochromis niloticus (Nile tilapia) (Tilapia nilotica)		membrane [GO:0016020]		1.0034	-1.4662	GLNLVQVK	90468	0	0	0	0	0	0	0	0	0	0	0	0	0	0	0	0	0	0	0	0	0	0	0	0	0	0	0	0	0	0	0	0	0	0	0	0	0	0	0
A0A669CXX0	G protein-regulated inducer of neurite outgrowth C-terminal domain-containing protein		Oreochromis niloticus (Nile tilapia) (Tilapia nilotica)				0.98294	-0.76167	LHGGQKK	0	0	0	0	0	0	0	0	0	0	0	0	0	0	0	0	0	0	0	0	0	0	0	0	0	0	0	0	0	0	0	0	0	0	0	0	0	0	0	0
A0A669CY88	ribonuclease H (EC 3.1.26.4)		Oreochromis niloticus (Nile tilapia) (Tilapia nilotica)	DNA integration [GO:0015074]		nucleic acid binding [GO:0003676]	1.0115	-1.1741	GLRPHER	0	0	0	0	0	0	0	0	0	0	0	0	0	0	0	0	0	0	0	0	0	0	0	0	0	0	0	0	0	0	0	0	0	0	0	0	4066.2	0	0	0
A0A669CYD2	Choline phosphotransferase 1	chpt1	Oreochromis niloticus (Nile tilapia) (Tilapia nilotica)	phospholipid biosynthetic process [GO:0008654]	membrane [GO:0016020]	phosphotransferase activity, for other substituted phosphate groups [GO:0016780]	0.99638	-2.9194	MGLIHLK	0	0	0	0	0	0	0	0	0	0	0	0	0	0	0	0	0	0	0	0	0	0	0	0	0	0	0	0	0	0	0	0	0	0	0	0	0	0	0	0
A0A669CYD5	Pyridoxal dependent decarboxylase domain containing 1	pdxdc1	Oreochromis niloticus (Nile tilapia) (Tilapia nilotica)	carboxylic acid metabolic process [GO:0019752]		carbon-carbon lyase activity [GO:0016830]; pyridoxal phosphate binding [GO:0030170]	1.019	0.031924	KGILEAELQLQK	0	0	0	0	0	575.03	0	0	0	0	0	0	0	0	0	0	0	0	0	0	0	0	0	0	0	0	0	0	0	0	0	0	0	0	0	0	0	0	0	0
A0A669CYD6	Centrosomal protein 290	cep290	Oreochromis niloticus (Nile tilapia) (Tilapia nilotica)	cell projection organization [GO:0030030]	cell projection [GO:0042995]; cytoplasm [GO:0005737]; cytoskeleton [GO:0005856]		0.99647	-4.2802	GRINYSKK	0	0	0	0	893.68	793.76	1025	0	0	0	751.75	839.5	0	0	0	0	0	0	1168.1	0	790.89	0	0	0	0	1708	1653.2	0	0	0	773.54	0	0	0	901	833.26	0	0	0	0
A0A669CYU8	E3 ubiquitin-protein ligase (EC 2.3.2.27)	DTX3	Oreochromis niloticus (Nile tilapia) (Tilapia nilotica)	Notch signaling pathway [GO:0007219]; protein ubiquitination [GO:0016567]	cytoplasm [GO:0005737]	metal ion binding [GO:0046872]; ubiquitin protein ligase activity [GO:0061630]	0.9957	-4.4612	FKKPVDEEACVMLHEAAQR	0	0	0	0	0	0	0	0	0	0	0	0	0	0	0	0	0	0	0	0	0	19389	0	20260	0	0	0	0	0	0	0	0	0	0	0	0	639.98	0	0	0
A0A669CYV0	Dedicator of cytokinesis 11		Oreochromis niloticus (Nile tilapia) (Tilapia nilotica)	small GTPase mediated signal transduction [GO:0007264]		guanyl-nucleotide exchange factor activity [GO:0005085]	0.99667	-4.2607	EARSLFAK	0	0	0	0	0	0	0	0	0	0	0	0	0	0	0	0	0	0	0	0	0	0	0	0	0	0	0	0	0	0	0	0	0	0	0	0	0	0	0	0
A0A669CYV2	glutamine--tRNA ligase (EC 6.1.1.18) (Glutaminyl-tRNA synthetase)	qars1	Oreochromis niloticus (Nile tilapia) (Tilapia nilotica)	glutaminyl-tRNA aminoacylation [GO:0006425]	aminoacyl-tRNA synthetase multienzyme complex [GO:0017101]; cytoplasm [GO:0005737]	ATP binding [GO:0005524]; glutamine-tRNA ligase activity [GO:0004819]	1.0036	-0.97329	TVTLKEDPGK	0	0	0	0	0	0	0	0	0	0	0	0	0	0	0	0	0	0	0	0	0	0	0	0	0	0	0	0	0	0	0	0	0	0	0	0	0	0	0	0
A0A669CYX6	Importin 9	ipo9	Oreochromis niloticus (Nile tilapia) (Tilapia nilotica)	intracellular protein transport [GO:0006886]	cytoplasm [GO:0005737]	small GTPase binding [GO:0031267]	1.0007	-1.4354	AAIRELLPSGLR	0	0	0	0	0	0	0	0	0	0	0	0	0	0	0	0	0	0	0	0	0	0	0	401.86	0	0	479.34	0	0	0	0	0	0	0	0	0	0	0	0	0
A0A669CYZ5	non-specific protein-tyrosine kinase (EC 2.7.10.2)		Oreochromis niloticus (Nile tilapia) (Tilapia nilotica)	positive regulation of cell population proliferation [GO:0008284]; protein phosphorylation [GO:0006468]; regulation of cellular component organization [GO:0051128]; response to stimulus [GO:0050896]; signal complex assembly [GO:0007172]	cell projection [GO:0042995]; cytoskeleton [GO:0005856]; focal adhesion [GO:0005925]; plasma membrane [GO:0005886]	ATP binding [GO:0005524]; non-membrane spanning protein tyrosine kinase activity [GO:0004715]	0.98951	-0.64841	GNALDKK	0	0	0	0	0	0	0	0	0	0	0	0	0	0	0	0	0	0	0	0	0	31496	30543	30745	0	0	0	0	0	0	0	0	0	0	0	0	0	0	0	0
A0A669CZ42	Kinesin-like protein	kif11	Oreochromis niloticus (Nile tilapia) (Tilapia nilotica)	cell cycle [GO:0007049]; cell division [GO:0051301]; microtubule-based movement [GO:0007018]; system development [GO:0048731]	microtubule [GO:0005874]; spindle pole [GO:0000922]	ATP binding [GO:0005524]; microtubule binding [GO:0008017]; microtubule motor activity [GO:0003777]	1.0052	-0.95245	RDLAATRDK	0	0	0	0	0	0	0	0	0	0	0	0	0	0	0	0	0	0	0	0	0	0	0	0	0	0	0	0	0	0	86642	0	0	0	0	0	0	0	0	0
A0A669CZ56	Platelet-derived growth factor receptor-like protein		Oreochromis niloticus (Nile tilapia) (Tilapia nilotica)		membrane [GO:0016020]		1.0004	-0.91841	AVLLQDPASVPR	0	0	0	0	0	0	0	0	0	0	0	0	0	0	0	0	0	0	0	0	0	0	0	0	0	0	0	0	0	0	0	0	0	0	0	0	0	0	0	0
A0A669CZ82	Cytochrome P450 20A1	LOC100698939	Oreochromis niloticus (Nile tilapia) (Tilapia nilotica)		membrane [GO:0016020]	heme binding [GO:0020037]; iron ion binding [GO:0005506]; monooxygenase activity [GO:0004497]; oxidoreductase activity, acting on paired donors, with incorporation or reduction of molecular oxygen [GO:0016705]	1.0004	-2.2252	DGNLQDIIDR	0	0	0	0	0	0	0	0	0	0	0	0	0	0	0	0	0	0	0	428.52	0	0	0	0	0	0	0	0	0	0	0	0	0	0	0	0	0	0	0	0
A0A669CZ88	Reverse transcriptase domain-containing protein		Oreochromis niloticus (Nile tilapia) (Tilapia nilotica)	regulation of DNA-templated transcription [GO:0006355]	nucleus [GO:0005634]		0.98293	-0.76167	RVCSNYR	0	0	0	0	0	0	0	0	0	0	0	0	0	0	401.86	0	0	0	0	0	0	0	0	0	405.61	0	0	0	0	0	0	0	0	0	0	0	0	0	0	390.46
A0A669CZ92	Testis development related protein	LOC102080552	Oreochromis niloticus (Nile tilapia) (Tilapia nilotica)	spermatogenesis [GO:0007283]			0.9869	-0.13091	LAELKTKTN	0	0	0	0	0	0	0	0	0	0	0	0	0	0	0	0	0	0	0	0	505.25	0	0	0	0	0	0	0	0	0	0	0	0	0	0	0	0	0	0	0
A0A669CZ93	Reverse transcriptase domain-containing protein		Oreochromis niloticus (Nile tilapia) (Tilapia nilotica)				1.0091	-1.3439	LEHCVGLKGTVLK	0	0	0	0	0	0	0	0	0	0	0	0	0	0	0	0	0	0	0	0	0	0	0	0	0	0	2976.2	0	0	0	0	0	0	0	0	0	0	0	0	0
A0A669CZ94	C-type lectin domain family 6 member A	LOC100696287	Oreochromis niloticus (Nile tilapia) (Tilapia nilotica)		membrane [GO:0016020]		1.0022	-1.4282	LSVELEGK	0	0	0	0	0	0	0	0	0	0	0	0	0	0	0	0	0	0	0	0	0	0	0	0	0	0	0	0	0	0	0	0	0	0	0	0	0	0	0	0
A0A669CZA6	Poly [ADP-ribose] polymerase (PARP) (EC 2.4.2.-)	LOC100707536	Oreochromis niloticus (Nile tilapia) (Tilapia nilotica)			NAD+ ADP-ribosyltransferase activity [GO:0003950]	0.98566	-0.68115	TDLAMLAIR	0	0	0	0	0	0	0	1593.6	0	0	0	0	0	0	0	0	0	0	0	0	0	0	0	0	0	0	0	765.63	0	0	0	0	0	0	0	0	0	0	0	0
A0A669CZH4	Nucleotide binding oligomerization domain containing 2	nod2	Oreochromis niloticus (Nile tilapia) (Tilapia nilotica)	innate immune response [GO:0045087]; regulation of apoptotic process [GO:0042981]	cytoplasm [GO:0005737]		0.98834	-0.11515	LAEELVLKQRTK	1061.1	0	0	0	0	0	0	0	0	0	0	0	0	0	0	0	0	0	0	0	0	0	0	0	0	0	0	0	0	0	0	0	0	0	0	0	0	0	0	0
A0A669CZJ1	PHD-type domain-containing protein		Oreochromis niloticus (Nile tilapia) (Tilapia nilotica)	proteolysis [GO:0006508]		cysteine-type peptidase activity [GO:0008234]; metal ion binding [GO:0046872]	0.98918	-0.78768	LETKLPR	18369	21157	23687	29579	27983	27786	36973	35356	34645	20613	0	19328	0	20448	18587	17129	18063	16052	30059	31799	33594	32020	33918	33198	0	21042	20248	26840	29050	35480	29818	33002	27053	19766	20116	19331	24052	24632	24298	20901
A0A669CZK6	Sterol carrier protein 2 (EC 2.3.1.155) (EC 2.3.1.16) (EC 2.3.1.176) (Acetyl-CoA C-myristoyltransferase) (Non-specific lipid-transfer protein) (Propanoyl-CoA C-acyltransferase) (SCP-2/3-oxoacyl-CoA thiolase) (SCP-2/thiolase) (SCP-chi) (Sterol carrier protein X)		Oreochromis niloticus (Nile tilapia) (Tilapia nilotica)	lipid transport [GO:0006869]	mitochondrion [GO:0005739]; peroxisome [GO:0005777]	acetyl-CoA C-acyltransferase activity [GO:0003988]; acetyl-CoA C-myristoyltransferase activity [GO:0050633]; lipid binding [GO:0008289]; propanoyl-CoA C-acyltransferase activity [GO:0033814]; propionyl-CoA C2-trimethyltridecanoyltransferase activity [GO:0050632]	0.99422	-0.31697	SQLLRRVHR	0	0	0	0	0	0	0	0	0	0	0	0	0	0	0	0	0	0	0	0	0	0	0	0	0	3475.9	0	0	0	0	0	0	0	0	0	0	0	0	0	0
A0A669CZM7	RAS p21 protein activator 1	rasa1	Oreochromis niloticus (Nile tilapia) (Tilapia nilotica)	regulation of GTPase activity [GO:0043087]; response to stimulus [GO:0050896]		GTPase activator activity [GO:0005096]	1.0079	-1.1998	YRTIAEER	0	0	3678.4	0	1818.6	0	0	7224.8	0	1525.3	1564.8	0	0	0	0	0	0	0	0	0	2412.3	0	2185.8	0	1196.3	0	0	0	0	0	0	0	0	1745.6	0	0	0	0	0	0
A0A669CZT9	NACHT, LRR and PYD domains-containing protein 12-like		Oreochromis niloticus (Nile tilapia) (Tilapia nilotica)				0.99837	-2.573	QLLCRNGVTGR	0	0	0	0	0	0	0	0	0	0	0	0	0	0	0	0	858.59	0	0	0	0	0	0	0	0	0	0	725.2	0	0	0	0	0	0	0	1414.4	0	0	0	0
A0A669D022	E3 ubiquitin-protein ligase TRIM39-like		Oreochromis niloticus (Nile tilapia) (Tilapia nilotica)			zinc ion binding [GO:0008270]	0.98249	-0.63073	VLFVSKRR	0	0	0	0	0	0	0	0	0	0	0	0	0	0	0	0	0	0	0	0	0	0	0	0	0	0	0	0	0	0	0	0	0	0	0	0	0	0	0	0
A0A669D046	Ankyrin repeat domain 24		Oreochromis niloticus (Nile tilapia) (Tilapia nilotica)			actin binding [GO:0003779]	0.99506	-0.8319	VLALIVKKGLCPTK	0	0	0	0	0	0	0	0	0	0	0	0	0	0	0	0	0	0	0	0	0	0	0	0	0	986.92	0	0	0	0	0	0	0	0	0	0	0	0	0	0
A0A669D048	Cytoplasmic linker associated protein 2		Oreochromis niloticus (Nile tilapia) (Tilapia nilotica)	regulation of cellular component organization [GO:0051128]	cytoplasm [GO:0005737]; kinetochore [GO:0000776]		0.99821	-3.1907	EHVIRTLALR	0	0	0	425.06	602.48	505.97	806.21	0	0	1110.2	0	385.06	0	0	0	0	0	880.41	0	745.69	757.88	797.51	724.1	737.68	0	0	0	572.98	545.34	0	0	792.76	717.36	0	0	0	383.25	441.69	417.47	1065.2
A0A669D0B2	Uncharacterized LOC100700562	LOC100700562	Oreochromis niloticus (Nile tilapia) (Tilapia nilotica)			carbohydrate binding [GO:0030246]	1.0115	-1.1741	TEFYLSR	0	0	0	0	0	0	0	0	0	0	0	0	0	0	0	0	0	0	0	0	0	0	0	0	0	0	712.72	0	0	0	0	0	0	0	0	0	0	0	0	0
A0A669D0F1	THAP-type domain-containing protein		Oreochromis niloticus (Nile tilapia) (Tilapia nilotica)			DNA binding [GO:0003677]	1.0088	-1.3439	YCAVRVCR	0	0	0	0	0	0	0	0	0	0	0	0	0	0	0	0	0	0	0	0	0	0	0	0	0	0	0	0	0	0	0	0	0	0	0	0	0	0	0	0
A0A669D0G7	BicC family RNA binding protein 1	bicc1	Oreochromis niloticus (Nile tilapia) (Tilapia nilotica)		membrane [GO:0016020]	RNA binding [GO:0003723]	0.98316	-0.42776	IMSVLDTK	0	0	0	0	0	0	0	0	0	0	0	0	0	0	0	0	0	0	0	0	0	0	0	0	0	0	0	0	0	0	0	0	0	0	0	0	0	0	0	0
A0A669D0H9	Elongation of very long chain fatty acids protein (EC 2.3.1.199) (Very-long-chain 3-oxoacyl-CoA synthase)	LOC100695278	Oreochromis niloticus (Nile tilapia) (Tilapia nilotica)	fatty acid biosynthetic process [GO:0006633]	membrane [GO:0016020]	fatty acid elongase activity [GO:0009922]; very-long-chain 3-ketoacyl-CoA synthase activity [GO:0102756]	1.0054	-1.0956	YITLIACVLR	0	0	0	0	0	0	0	0	0	0	0	0	0	0	0	0	0	0	0	0	0	0	0	0	0	0	0	0	0	0	0	0	0	0	0	0	0	0	0	0
A0A669D0K1	DNA polymerase zeta catalytic subunit (EC 2.7.7.7)	rev3l	Oreochromis niloticus (Nile tilapia) (Tilapia nilotica)	translesion synthesis [GO:0019985]	nuclear lumen [GO:0031981]; zeta DNA polymerase complex [GO:0016035]	DNA binding [GO:0003677]; DNA-directed DNA polymerase activity [GO:0003887]; iron-sulfur cluster binding [GO:0051536]; metal ion binding [GO:0046872]; nucleotide binding [GO:0000166]	1.0068	-1.5956	ALTKLLDARQLGLK	0	0	0	0	0	0	0	0	0	0	0	0	0	0	0	0	0	0	0	0	0	0	0	0	0	0	0	0	0	0	0	0	0	0	951.05	0	0	0	0	0
A0A669D0X7	Tc1-like transposase DDE domain-containing protein		Oreochromis niloticus (Nile tilapia) (Tilapia nilotica)			nucleic acid binding [GO:0003676]	0.99934	-1.0518	GQRVPVR	0	0	0	0	0	0	0	0	0	0	0	0	0	0	0	0	0	0	0	0	0	0	0	0	0	0	0	0	0	0	0	0	0	0	0	0	0	0	0	0
A0A669D108	Flavin-containing monooxygenase (EC 1.-.-.-)	LOC100704224	Oreochromis niloticus (Nile tilapia) (Tilapia nilotica)	lipid metabolic process [GO:0006629]	endoplasmic reticulum membrane [GO:0005789]	flavin adenine dinucleotide binding [GO:0050660]; hypotaurine dehydrogenase activity [GO:0047822]; N,N-dimethylaniline monooxygenase activity [GO:0004499]; NAD(P)H oxidase H2O2-forming activity [GO:0016174]; NADP binding [GO:0050661]	0.96639	0.06252	IAVIGAGPSGLTSIK	0	0	0	0	0	0	0	0	0	0	0	0	0	0	0	0	0	0	0	0	0	0	0	0	0	0	0	0	0	0	0	0	0	0	0	0	653.93	0	0	0
A0A669D132	Transketolase	TKT	Oreochromis niloticus (Nile tilapia) (Tilapia nilotica)			metal ion binding [GO:0046872]; transferase activity [GO:0016740]	1.0075	-1.2308	VGSAYGMALAK	0	0	0	0	0	0	0	0	0	0	0	0	0	0	0	0	0	0	0	0	0	0	0	0	0	0	0	0	0	0	0	0	0	0	0	0	0	0	0	0
A0A669D1N1	E1A binding protein p400	ep400	Oreochromis niloticus (Nile tilapia) (Tilapia nilotica)			ATP binding [GO:0005524]; ATP-dependent chromatin remodeler activity [GO:0140658]	0.99921	-3.3331	DVEKQLPKK	0	0	0	0	0	0	0	0	0	0	0	0	0	0	0	0	0	0	0	0	766.23	0	0	0	0	0	0	0	0	0	0	0	0	1396.6	0	0	0	0	0	0
A0A669D1W8	Ankyrin 2		Oreochromis niloticus (Nile tilapia) (Tilapia nilotica)	localization [GO:0051179]; signal transduction [GO:0007165]	cytoskeleton [GO:0005856]; membrane [GO:0016020]		1.0038	-1.6523	ALNGFTPLHIACK	0	0	0	0	0	0	0	0	0	0	0	0	0	0	0	0	0	0	0	0	0	0	0	0	0	0	0	0	0	0	0	0	0	0	0	0	0	0	0	0
A0A669D217	Uncharacterized LOC102077151	LOC102077151	Oreochromis niloticus (Nile tilapia) (Tilapia nilotica)				1.0035	-0.88008	GKDLIRGLSQLSK	0	0	0	0	0	0	0	619.39	0	0	0	0	0	0	0	0	0	0	0	0	0	0	0	0	0	0	0	0	0	0	0	0	0	0	0	0	0	0	0	0
A0A669D275	non-specific serine/threonine protein kinase (EC 2.7.11.1)	LOC100698564	Oreochromis niloticus (Nile tilapia) (Tilapia nilotica)	intracellular signal transduction [GO:0035556]; protein phosphorylation [GO:0006468]		ATP binding [GO:0005524]; magnesium ion binding [GO:0000287]; protein serine/threonine kinase activity [GO:0004674]	1.0121	-1.1524	VLGQGSYGK	0	0	0	0	0	0	0	0	0	0	0	0	0	0	0	0	0	0	0	0	0	0	0	0	691.43	0	0	0	0	0	0	0	0	0	0	0	0	0	0	0
A0A669D2D2	mitogen-activated protein kinase kinase kinase (EC 2.7.11.25)		Oreochromis niloticus (Nile tilapia) (Tilapia nilotica)	protein phosphorylation [GO:0006468]	cytoplasm [GO:0005737]	ATP binding [GO:0005524]; MAP kinase kinase kinase activity [GO:0004709]; metal ion binding [GO:0046872]	1.001	-1.4662	CFEPDPHK	0	0	0	0	0	0	0	0	0	0	0	0	0	0	0	0	0	0	0	0	0	0	0	0	0	0	0	0	0	0	0	0	0	0	0	0	0	0	0	0
A0A669D2F1	Integrator complex subunit 6	LOC100710804	Oreochromis niloticus (Nile tilapia) (Tilapia nilotica)				1.0017	-2.366	IQNFSRALFR	0	0	0	0	0	0	0	0	0	0	0	0	0	0	0	0	0	0	0	0	0	0	0	0	0	0	0	0	0	0	0	0	0	0	0	0	0	0	0	0
A0A669D2F9	PH domain and leucine rich repeat protein phosphatase 1		Oreochromis niloticus (Nile tilapia) (Tilapia nilotica)				1.007	-0.91394	LGGSAALCHIR	0	0	0	0	0	0	302.11	0	0	0	0	0	0	0	0	0	0	0	0	0	0	0	0	0	0	0	0	0	0	0	0	0	0	0	0	0	0	0	0	0
A0A669D2K7	methenyltetrahydrofolate cyclohydrolase (EC 3.5.4.9)	LOC100702918	Oreochromis niloticus (Nile tilapia) (Tilapia nilotica)	one-carbon metabolic process [GO:0006730]		methenyltetrahydrofolate cyclohydrolase activity [GO:0004477]; methylenetetrahydrofolate dehydrogenase (NADP+) activity [GO:0004488]	0.99825	-1.0129	NVLVAGRSK	0	0	0	0	0	0	0	0	0	0	3578.1	0	0	0	0	0	0	0	0	0	0	0	0	0	0	0	0	0	0	0	0	0	0	0	0	0	0	0	0	0
A0A669D2S8	DNA topoisomerase I (EC 5.6.2.1) (DNA topoisomerase 1)	LOC100697672	Oreochromis niloticus (Nile tilapia) (Tilapia nilotica)	DNA topological change [GO:0006265]	chromosome [GO:0005694]; nucleus [GO:0005634]	DNA binding [GO:0003677]; DNA topoisomerase type I (single strand cut, ATP-independent) activity [GO:0003917]	1.0017	-2.3515	DQLRPLQILR	0	0	0	0	0	0	0	0	0	0	0	0	0	0	0	0	0	0	0	0	0	0	0	0	0	0	0	0	0	0	0	0	0	0	0	0	0	0	0	0
A0A669D2T0	Fibronectin leucine rich transmembrane protein 2		Oreochromis niloticus (Nile tilapia) (Tilapia nilotica)		membrane [GO:0016020]		1.0099	-1.1741	WVVVWLK	0	0	0	0	0	0	0	0	0	0	0	0	0	0	0	0	0	0	0	0	0	0	0	0	0	0	0	0	0	0	0	0	0	0	0	0	0	0	0	0
A0A669D303	Reverse transcriptase domain-containing protein		Oreochromis niloticus (Nile tilapia) (Tilapia nilotica)				0.99685	-3.9762	MKLMTIGSDHYPIKIEVR	0	0	0	0	0	26405	0	69986	0	0	0	0	0	0	0	0	0	0	0	0	0	0	0	0	0	0	0	0	0	0	0	0	0	0	0	0	0	0	0	0
A0A669D3B1	Reverse transcriptase domain-containing protein		Oreochromis niloticus (Nile tilapia) (Tilapia nilotica)				0.99685	-4.0226	CIKDDQGRFVIIIGR	0	0	0	0	0	0	0	0	0	0	0	0	0	0	0	0	0	0	0	0	0	0	0	3429.6	0	0	0	0	0	0	0	0	0	0	0	0	0	0	0	0
A0A669D3H8	Sodium/calcium exchanger 2	LOC100705763	Oreochromis niloticus (Nile tilapia) (Tilapia nilotica)	cell communication [GO:0007154]	plasma membrane [GO:0005886]	calcium:sodium antiporter activity [GO:0005432]; calmodulin binding [GO:0005516]; metal ion binding [GO:0046872]	0.97965	-0.39739	QYEWCSGKR	0	0	0	0	0	0	0	0	0	0	0	0	0	0	0	0	0	0	0	0	0	0	0	0	0	0	0	0	0	0	0	0	0	0	0	0	0	0	0	0
A0A669D3K4	DNA (cytosine-5-)-methyltransferase (EC 2.1.1.37)	LOC100696323	Oreochromis niloticus (Nile tilapia) (Tilapia nilotica)	regulation of gene expression [GO:0010468]	nucleus [GO:0005634]	DNA (cytosine-5-)-methyltransferase activity [GO:0003886]; metal ion binding [GO:0046872]	0.98546	-0.37015	RFPYSEKWK	0	0	0	0	0	0	0	0	0	0	0	0	0	0	0	575.43	0	0	0	0	0	0	0	0	0	0	0	0	0	0	0	0	0	0	0	0	0	0	0	0
A0A669D3L7	Voltage-dependent N-type calcium channel subunit alpha		Oreochromis niloticus (Nile tilapia) (Tilapia nilotica)	regulation of monoatomic ion transmembrane transport [GO:0034765]	voltage-gated calcium channel complex [GO:0005891]	metal ion binding [GO:0046872]; voltage-gated calcium channel activity [GO:0005245]	0.99931	-1.0301	EKINLSFLR	0	0	0	0	0	0	0	0	0	0	0	0	0	0	0	0	0	0	0	0	0	0	0	0	0	0	0	0	0	0	0	0	0	0	0	0	0	0	0	0
A0A669D3M6	Ankyrin repeat and BTB/POZ domain-containing protein BTBD11-A	LOC100709613	Oreochromis niloticus (Nile tilapia) (Tilapia nilotica)				0.9957	-4.5914	FLQDLGFRMLNCGRTDLVK	0	0	0	0	0	0	0	0	0	0	0	0	0	0	0	0	0	0	0	0	0	0	0	0	0	0	0	0	0	999.03	0	0	0	0	0	0	0	0	0	0
A0A669D3T1	Metabotropic glutamate receptor 4	LOC100700221	Oreochromis niloticus (Nile tilapia) (Tilapia nilotica)		plasma membrane [GO:0005886]	G protein-coupled receptor activity [GO:0004930]	1.0007	-1.6793	IGKDSQYEQEGK	0	4703.1	0	0	3326.9	0	0	0	0	0	1968.5	0	0	0	0	0	0	0	0	0	0	0	0	0	0	0	0	0	0	0	0	0	0	2430.9	0	0	0	0	0	0
A0A669D3Z1	AT-hook containing transcription factor 1	ahctf1	Oreochromis niloticus (Nile tilapia) (Tilapia nilotica)		nucleus [GO:0005634]		1.0057	-1.4739	KTPSTPTRR	0	0	0	0	0	0	0	0	0	0	0	0	0	0	0	0	0	0	0	0	0	0	0	0	1520.7	0	0	0	0	0	0	0	0	0	0	0	0	0	0	0
A0A669D435	NACHT domain-containing protein		Oreochromis niloticus (Nile tilapia) (Tilapia nilotica)	innate immune response [GO:0045087]; regulation of apoptotic process [GO:0042981]	cytoplasm [GO:0005737]		0.97087	0.019089	DVVKHAESLWR	0	0	0	0	0	0	0	0	0	0	0	0	0	0	0	0	0	0	0	0	0	0	0	0	0	0	0	691.12	718.87	0	0	0	0	0	0	0	0	0	0	0
A0A669D473	Leucine-rich repeat-containing protein 32	LOC100708733	Oreochromis niloticus (Nile tilapia) (Tilapia nilotica)		membrane [GO:0016020]		1.0051	-1.0956	ISLHNNIILK	0	0	0	0	0	0	0	0	0	0	0	0	0	0	0	0	0	0	0	0	0	0	3208.5	0	0	0	0	0	0	0	0	0	0	0	0	0	0	0	0	0
A0A669D494	RCR-type E3 ubiquitin transferase (EC 2.3.2.33)		Oreochromis niloticus (Nile tilapia) (Tilapia nilotica)	protein ubiquitination [GO:0016567]; regulation of metabolic process [GO:0019222]	axon [GO:0030424]	metal ion binding [GO:0046872]	0.99881	-3.4521	AVPVSQKK	0	0	0	0	0	0	0	0	0	0	0	0	0	0	0	0	0	0	0	0	0	0	0	0	0	0	0	0	0	0	0	0	0	0	0	0	0	0	0	0
A0A669D4E8	Polybromo 1		Oreochromis niloticus (Nile tilapia) (Tilapia nilotica)	chromatin remodeling [GO:0006338]	RSC-type complex [GO:0016586]	chromatin binding [GO:0003682]; DNA binding [GO:0003677]	1.0096	-0.19529	VSVHLKAQRR	0	0	0	0	0	0	0	0	0	0	0	0	0	0	0	0	0	0	0	0	0	483.16	0	0	0	0	0	0	0	0	0	0	945.29	0	0	0	0	0	0	0
A0A669D4Q5	G-protein coupled receptors family 3 profile domain-containing protein		Oreochromis niloticus (Nile tilapia) (Tilapia nilotica)		plasma membrane [GO:0005886]	G protein-coupled receptor activity [GO:0004930]	1.0116	-1.1741	IAAQIPK	0	0	0	0	0	0	0	0	0	0	253.86	0	0	0	0	0	0	0	0	0	0	0	0	0	0	0	0	0	0	0	0	0	0	0	0	0	0	0	0	0
A0A669D502	Fem-1 homolog B	fem1b	Oreochromis niloticus (Nile tilapia) (Tilapia nilotica)				1.0128	-1.1524	LWLHALQLR	0	0	0	0	0	0	0	0	0	0	0	0	0	0	0	0	0	0	0	0	0	0	0	0	0	0	0	0	0	0	0	0	0	0	0	0	0	0	0	0
A0A669D508	60S ribosomal protein L13a	rpl13a	Oreochromis niloticus (Nile tilapia) (Tilapia nilotica)	translation [GO:0006412]	large ribosomal subunit [GO:0015934]	structural constituent of ribosome [GO:0003735]	1.0129	-0.20905	KRMVVPAFALLGR	0	0	0	756.35	0	0	893.84	0	0	0	0	0	0	0	0	0	0	0	0	0	0	0	0	0	0	0	0	0	535.51	0	0	0	0	0	0	0	0	0	0	0
A0A669D534	RING-type E3 ubiquitin transferase (EC 2.3.2.27)	ube4a	Oreochromis niloticus (Nile tilapia) (Tilapia nilotica)	protein ubiquitination [GO:0016567]; ubiquitin-dependent ERAD pathway [GO:0030433]	cytoplasm [GO:0005737]; ubiquitin ligase complex [GO:0000151]	ubiquitin-ubiquitin ligase activity [GO:0034450]	1.0126	-0.26014	KLLSFAVRCK	0	0	0	0	0	0	0	0	0	0	0	0	0	0	0	0	0	0	0	0	0	0	0	0	0	0	0	0	0	0	0	0	0	0	0	0	0	0	0	0
A0A669D582	Glutamate receptor	grin2a	Oreochromis niloticus (Nile tilapia) (Tilapia nilotica)		NMDA selective glutamate receptor complex [GO:0017146]; postsynaptic membrane [GO:0045211]	inorganic cation transmembrane transporter activity [GO:0022890]; ionotropic glutamate receptor activity [GO:0004970]	1.001	-1.4342	LDNRSLTLK	0	0	0	0	0	0	0	0	0	0	0	0	0	0	0	0	0	0	0	0	0	0	0	0	0	0	0	0	0	0	0	0	0	0	0	0	0	0	0	0
A0A669D588	Syntaxin binding protein 2	stxbp2	Oreochromis niloticus (Nile tilapia) (Tilapia nilotica)	protein transport [GO:0015031]; vesicle-mediated transport [GO:0016192]			0.99142	-0.76445	SLYSFYGSK	0	0	0	0	0	0	0	0	0	0	0	0	0	0	0	0	0	0	0	0	0	0	0	0	0	0	0	0	0	0	0	0	0	0	0	0	0	0	0	0
A0A669D5A0	116 kDa U5 small nuclear ribonucleoprotein component (U5 snRNP-specific protein, 116 kDa)	eftud2	Oreochromis niloticus (Nile tilapia) (Tilapia nilotica)	mRNA processing [GO:0006397]; RNA splicing [GO:0008380]	spliceosomal complex [GO:0005681]	GTP binding [GO:0005525]; GTPase activity [GO:0003924]	0.98949	-0.63716	YLCISAQVMLNTER	0	0	0	0	0	0	0	0	0	0	0	0	0	0	0	0	0	0	0	0	0	0	0	0	0	0	0	0	0	0	0	0	0	0	0	0	0	0	0	0
A0A669D5D0	Protein turtle homolog A	LOC100709160	Oreochromis niloticus (Nile tilapia) (Tilapia nilotica)		membrane [GO:0016020]		1.0139	-1.1741	GGETEIR	0	0	0	0	0	0	0	0	0	0	0	0	0	0	0	0	0	0	0	0	0	0	0	0	0	0	0	0	0	0	0	0	0	0	0	0	0	0	0	0
A0A669D5E6	SEC24 homolog D, COPII coat complex component	sec24d	Oreochromis niloticus (Nile tilapia) (Tilapia nilotica)	endoplasmic reticulum to Golgi vesicle-mediated transport [GO:0006888]; intracellular protein transport [GO:0006886]	COPII vesicle coat [GO:0030127]; cytosol [GO:0005829]; endoplasmic reticulum membrane [GO:0005789]	zinc ion binding [GO:0008270]	1.006	-1.1103	NTLRLPATPVR	0	0	0	0	0	0	0	0	0	0	0	0	0	0	0	0	0	0	0	0	0	0	0	0	0	0	0	0	0	0	0	0	0	0	0	0	0	0	0	0
A0A669D5K6	Disks large homolog 4	LOC100693164	Oreochromis niloticus (Nile tilapia) (Tilapia nilotica)		membrane [GO:0016020]		1.0024	-1.459	RKPAAEKVTEIK	0	722.14	0	0	0	0	0	0	0	0	0	0	0	0	0	0	0	0	0	0	0	0	0	0	0	0	0	0	0	0	605.94	0	0	0	0	0	0	0	0	0
A0A669D5N7	MAX network transcriptional repressor	mnt	Oreochromis niloticus (Nile tilapia) (Tilapia nilotica)			protein dimerization activity [GO:0046983]	0.98155	-0.51212	EKLRLQHLK	0	0	0	0	1430.8	0	1280.8	0	0	0	0	0	0	0	0	0	0	0	0	0	0	0	0	0	0	0	0	0	1042.4	0	0	0	0	0	0	0	0	0	0	0
A0A669D5P0	Myosin-binding protein C, fast-type	LOC100699981	Oreochromis niloticus (Nile tilapia) (Tilapia nilotica)		membrane [GO:0016020]		1.0038	-1.628	GKWLDLGSKAGK	0	0	0	0	0	0	0	0	0	0	0	0	0	0	0	0	0	0	2174.7	0	0	0	0	0	0	0	0	0	0	0	0	0	0	0	0	0	0	0	1852.8	0
A0A669D5Q2	Cullin-associated and neddylation-dissociated 2 (putative)		Oreochromis niloticus (Nile tilapia) (Tilapia nilotica)	SCF complex assembly [GO:0010265]			1.0128	-1.1741	VGEHLEK	0	0	0	0	0	0	0	0	0	0	0	0	0	0	0	0	0	0	0	0	0	0	1325.1	0	0	0	0	0	0	0	0	0	0	0	0	0	0	0	0	0
A0A669D5S1	Cullin 5	CUL5	Oreochromis niloticus (Nile tilapia) (Tilapia nilotica)	ubiquitin-dependent protein catabolic process [GO:0006511]		ubiquitin protein ligase binding [GO:0031625]	0.99628	-4.4448	ALRYLETRR	0	0	0	0	0	0	0	0	0	0	0	0	0	0	0	0	0	0	0	0	0	0	0	0	0	0	0	0	0	0	0	0	0	0	0	0	0	0	0	0
A0A669D5S4	RNA helicase (EC 3.6.4.13)	dhx16	Oreochromis niloticus (Nile tilapia) (Tilapia nilotica)			ATP binding [GO:0005524]; hydrolase activity [GO:0016787]; nucleic acid binding [GO:0003676]; RNA helicase activity [GO:0003724]	1.0093	-1.2689	TASLSFGAK	0	0	0	0	0	0	0	0	0	0	0	0	0	0	0	0	0	0	0	0	0	0	0	0	0	0	0	0	0	0	0	0	0	0	0	0	0	0	0	0
A0A669D5Y7	Extended synaptotagmin-2-A	LOC100697520	Oreochromis niloticus (Nile tilapia) (Tilapia nilotica)	endoplasmic reticulum-plasma membrane tethering [GO:0061817]; lipid transport [GO:0006869]	endoplasmic reticulum membrane [GO:0005789]; plasma membrane [GO:0005886]	lipid binding [GO:0008289]	1.0013	-1.0538	LYLLPDKR	0	0	0	0	0	0	0	0	0	0	0	0	0	0	0	0	0	0	0	0	0	0	0	0	0	0	0	0	0	0	0	0	0	449.38	0	0	0	0	0	0
A0A669D5Z8	Ubiquinone biosynthesis monooxygenase COQ6, mitochondrial (EC 1.14.13.-) (Coenzyme Q10 monooxygenase 6)	coq6 COQ6	Oreochromis niloticus (Nile tilapia) (Tilapia nilotica)	ubiquinone biosynthetic process [GO:0006744]	cell projection [GO:0042995]; extrinsic component of mitochondrial inner membrane [GO:0031314]; Golgi apparatus [GO:0005794]	2-octaprenyl-6-methoxyphenol hydroxylase activity [GO:0008681]; FAD binding [GO:0071949]; oxidoreductase activity, acting on paired donors, with incorporation or reduction of molecular oxygen, NAD(P)H as one donor, and incorporation of one atom of oxygen [GO:0016709]; oxidoreductase activity, acting on paired donors, with incorporation or reduction of molecular oxygen, reduced flavin or flavoprot…	0.9814	-0.63073	MRFKPYKK	0	0	0	0	0	0	0	0	0	0	0	0	0	0	0	0	0	0	0	0	0	0	0	0	0	0	0	0	0	0	0	0	0	0	0	0	0	0	0	0
A0A669D616	DNA helicase (EC 3.6.4.12)	LOC100705962	Oreochromis niloticus (Nile tilapia) (Tilapia nilotica)		nucleus [GO:0005634]	ATP binding [GO:0005524]; ATP-dependent chromatin remodeler activity [GO:0140658]; DNA binding [GO:0003677]; helicase activity [GO:0004386]; hydrolase activity [GO:0016787]; metal ion binding [GO:0046872]	0.99493	-0.82023	KSKPAPKPQEK	0	0	0	0	0	0	0	0	0	0	0	0	0	0	0	0	0	0	0	0	0	0	0	0	0	0	0	0	0	0	0	0	0	0	0	0	0	0	0	0
A0A669D625	glutaminase (EC 3.5.1.2)	LOC100694977	Oreochromis niloticus (Nile tilapia) (Tilapia nilotica)	glutamine metabolic process [GO:0006541]		glutaminase activity [GO:0004359]	1.0029	-1.4662	VLSTEAVR	0	0	0	0	0	0	0	0	0	0	0	0	0	0	0	522.05	0	0	0	0	0	0	0	0	0	0	0	0	0	0	0	0	0	0	0	0	0	0	0	0
A0A669D645	Lin-54 DREAM MuvB core complex component	lin54	Oreochromis niloticus (Nile tilapia) (Tilapia nilotica)		nucleus [GO:0005634]		1.0105	-1.1741	SQAPQFK	0	0	0	0	1288.2	0	0	0	0	0	0	0	0	0	0	0	0	0	0	0	0	0	0	0	3199.5	0	3116.3	0	0	0	0	912.85	0	0	0	1414.4	0	0	0	0
A0A669D6A4	Conserved oligomeric Golgi complex subunit 1	cog1	Oreochromis niloticus (Nile tilapia) (Tilapia nilotica)	intra-Golgi vesicle-mediated transport [GO:0006891]; protein transport [GO:0015031]	Golgi transport complex [GO:0017119]; membrane [GO:0016020]		1.0082	-1.1769	STGSPSSSSFNR	0	0	0	0	0	0	0	554.21	0	0	0	0	0	0	0	0	0	0	0	0	0	0	0	0	0	0	0	0	0	0	0	0	0	0	0	0	0	515.52	0	0
A0A669D6B1	ATP synthase-coupling factor 6, mitochondrial (ATP synthase peripheral stalk subunit F6)	LOC100693397	Oreochromis niloticus (Nile tilapia) (Tilapia nilotica)	proton motive force-driven ATP synthesis [GO:0015986]	mitochondrial proton-transporting ATP synthase complex, coupling factor F(o) [GO:0000276]	proton transmembrane transporter activity [GO:0015078]	1.0016	-1.059	LNDGVINQNKEK	0	0	0	0	0	0	0	0	0	0	0	0	0	0	0	0	0	0	0	0	0	0	0	0	0	0	0	0	0	0	0	0	0	0	0	0	0	0	0	0
A0A669D6F7	Metastasis associated 1 family member 2	mta2	Oreochromis niloticus (Nile tilapia) (Tilapia nilotica)	regulation of DNA-templated transcription [GO:0006355]	nucleus [GO:0005634]	chromatin binding [GO:0003682]; metal ion binding [GO:0046872]; sequence-specific DNA binding [GO:0043565]	0.99711	-0.8319	SKLVPRQSLATIVK	0	0	0	0	0	0	0	0	0	0	0	0	0	0	0	0	0	0	0	0	0	0	0	0	0	0	0	0	0	0	0	0	0	0	0	0	0	0	0	0
A0A669D6G5	Stromal antigen 2b		Oreochromis niloticus (Nile tilapia) (Tilapia nilotica)				1.0034	-2.0639	LEKHLESLLR	0	0	0	0	0	0	0	1151.5	0	0	0	0	0	0	0	0	0	0	0	0	0	0	0	0	0	0	0	0	0	0	0	0	0	0	0	0	0	0	0	0
A0A669D6G9	Zinc finger protein ZFMSA12A	LOC100699968	Oreochromis niloticus (Nile tilapia) (Tilapia nilotica)				0.99633	-0.18176	LMSGDKHRK	0	685.72	620.84	935.25	0	0	0	1315.1	0	0	0	941.22	0	571.6	0	0	0	0	1205.5	0	0	0	0	0	777.63	0	0	0	0	0	0	0	0	0	0	0	0	0	0	0
A0A669D6J6	MAP7 domain-containing protein 1	LOC100703997	Oreochromis niloticus (Nile tilapia) (Tilapia nilotica)	microtubule cytoskeleton organization [GO:0000226]	microtubule cytoskeleton [GO:0015630]		0.99393	-2.7527	LEKNKER	0	0	0	0	0	0	0	0	0	0	0	0	0	0	0	0	0	0	0	0	0	0	0	0	0	0	0	0	0	0	0	0	0	0	0	0	0	0	0	0
A0A669D6P7	Endophilin-B1 (SH3 domain-containing GRB2-like protein B1)		Oreochromis niloticus (Nile tilapia) (Tilapia nilotica)	apoptotic process [GO:0006915]	Golgi membrane [GO:0000139]; mitochondrial outer membrane [GO:0005741]		0.99752	-0.82986	VPVTYLELLS	0	0	0	0	0	0	0	0	0	0	0	0	0	0	0	0	0	0	0	0	0	0	0	0	0	0	0	0	0	0	0	0	0	0	0	0	0	0	0	0
A0A669D6T1	Integrin beta		Oreochromis niloticus (Nile tilapia) (Tilapia nilotica)	cell adhesion [GO:0007155]; integrin-mediated signaling pathway [GO:0007229]	plasma membrane [GO:0005886]		1.0057	-1.4756	AFEAKFFK	0	0	1159.5	0	0	1249.8	1433.5	1376	1447.5	0	0	0	0	0	0	0	0	458.77	0	0	0	0	0	0	0	0	0	0	0	0	0	0	0	0	0	0	0	0	1179.6	0
A0A669D6Z6	Teneurin transmembrane protein 3	TENM3	Oreochromis niloticus (Nile tilapia) (Tilapia nilotica)	anatomical structure development [GO:0048856]; signal transduction [GO:0007165]	cell projection [GO:0042995]; plasma membrane [GO:0005886]		1.0112	-1.1741	FADVEIR	0	0	0	0	0	0	0	0	0	0	0	0	0	0	0	0	0	0	0	0	0	0	0	0	0	0	1670.7	0	0	0	0	0	0	0	0	692.13	0	0	0	0
A0A669D734	Methanethiol oxidase (MTO) (EC 1.8.3.4) (Selenium-binding protein 1)		Oreochromis niloticus (Nile tilapia) (Tilapia nilotica)	protein transport [GO:0015031]	cytosol [GO:0005829]; membrane [GO:0016020]; nucleus [GO:0005634]	methanethiol oxidase activity [GO:0018549]; selenium binding [GO:0008430]	0.9986	-1.0254	APKIHKVR	0	0	0	0	0	0	0	0	0	0	0	0	0	0	0	0	0	0	0	0	0	0	0	0	0	594.75	0	0	0	0	0	0	0	0	0	0	0	0	0	0
A0A669D790	Ig-like domain-containing protein		Oreochromis niloticus (Nile tilapia) (Tilapia nilotica)		membrane [GO:0016020]		1.0002	-2.2258	HMMKTNR	0	0	0	0	0	0	0	0	0	0	0	0	0	0	0	0	0	0	0	0	0	0	0	0	0	0	0	0	0	0	0	0	0	0	0	0	0	0	0	0
A0A669D7A7	Pumilio RNA binding family member 3	pum3	Oreochromis niloticus (Nile tilapia) (Tilapia nilotica)			RNA binding [GO:0003723]	0.99261	-0.33732	NKELVAAVINRFK	0	0	0	0	0	0	0	0	0	0	0	0	0	0	0	0	0	0	0	0	0	0	0	0	0	0	0	0	0	0	0	0	0	0	0	0	0	0	0	0
A0A669D7P4	Ras protein-specific guanine nucleotide-releasing factor 2b		Oreochromis niloticus (Nile tilapia) (Tilapia nilotica)	small GTPase mediated signal transduction [GO:0007264]		guanyl-nucleotide exchange factor activity [GO:0005085]	1.0059	-1.6105	DDVDICFSK	0	0	0	0	0	0	0	0	0	0	0	0	691.93	0	0	0	0	0	0	0	0	0	0	0	0	0	0	0	1053.7	0	0	0	0	0	0	0	0	0	0	0
A0A669D7R6	78 kDa glucose-regulated protein (Binding-immunoglobulin protein) (Heat shock protein 70 family protein 5) (Heat shock protein family A member 5) (Immunoglobulin heavy chain-binding protein)		Oreochromis niloticus (Nile tilapia) (Tilapia nilotica)		endoplasmic reticulum lumen [GO:0005788]	ATP binding [GO:0005524]; ATP-dependent protein folding chaperone [GO:0140662]	1	-1.4412	LVPTKEAR	0	0	0	0	0	0	0	0	0	0	0	0	0	0	0	0	0	0	0	0	0	0	0	0	0	0	0	0	0	0	0	0	0	0	0	0	0	0	0	0
A0A669D7Z3	Gluconokinase (EC 2.7.1.12)	idnk	Oreochromis niloticus (Nile tilapia) (Tilapia nilotica)	D-gluconate catabolic process [GO:0046177]; phosphorylation [GO:0016310]		ATP binding [GO:0005524]; gluconokinase activity [GO:0046316]	1.012	-1.1741	LHEVIQR	0	0	0	0	0	0	0	0	0	0	0	0	0	0	0	0	0	0	0	0	0	0	0	0	0	0	0	0	0	0	0	0	0	0	0	0	0	0	0	0
A0A669D840	Cadherin-4	LOC100702438	Oreochromis niloticus (Nile tilapia) (Tilapia nilotica)	epithelium development [GO:0060429]; homophilic cell adhesion via plasma membrane adhesion molecules [GO:0007156]	plasma membrane [GO:0005886]	calcium ion binding [GO:0005509]	0.98774	-0.63073	VIRICKDK	0	0	0	0	0	0	0	0	0	0	0	0	0	0	0	0	0	0	0	0	0	0	0	0	0	0	0	0	0	0	0	0	0	0	0	0	0	0	0	0
A0A669D893	VPS39 subunit of HOPS complex		Oreochromis niloticus (Nile tilapia) (Tilapia nilotica)	intracellular protein transport [GO:0006886]; vesicle-mediated transport [GO:0016192]	cytoplasm [GO:0005737]; intracellular membrane-bounded organelle [GO:0043231]		0.98711	-0.76167	KDAGGNR	0	0	0	0	0	0	0	0	0	0	2211.8	0	0	0	0	0	0	0	0	0	0	0	0	0	0	0	0	0	0	0	0	0	0	0	0	0	0	0	0	0
A0A669D8F5	Integrase catalytic domain-containing protein		Oreochromis niloticus (Nile tilapia) (Tilapia nilotica)	DNA integration [GO:0015074]		nucleic acid binding [GO:0003676]	1.0021	-2.1379	KCPGKPTR	0	0	0	0	0	0	0	0	0	0	0	0	999.22	0	0	0	0	0	0	0	0	0	0	0	0	0	0	0	0	0	0	0	0	0	0	0	0	0	0	0
A0A669D8G8	Ubiquitin carboxyl-terminal hydrolase (EC 3.4.19.12)		Oreochromis niloticus (Nile tilapia) (Tilapia nilotica)	protein deubiquitination [GO:0016579]; ubiquitin-dependent protein catabolic process [GO:0006511]		cysteine-type deubiquitinase activity [GO:0004843]	1.0034	-2.0839	MPIVDKLK	0	0	0	0	0	860.21	0	0	0	0	0	843.32	0	0	0	0	0	0	0	0	0	0	0	0	0	0	0	0	0	0	0	0	0	0	0	0	0	0	0	0
A0A669D8L5	alpha-mannosidase (EC 3.2.1.24)	man2c1	Oreochromis niloticus (Nile tilapia) (Tilapia nilotica)	mannose metabolic process [GO:0006013]	membrane [GO:0016020]	alpha-mannosidase activity [GO:0004559]; carbohydrate binding [GO:0030246]; metal ion binding [GO:0046872]	1.0111	-0.19562	YHLPVLKNRR	0	0	0	0	0	0	0	0	0	0	0	0	0	0	0	0	0	0	0	0	0	0	0	0	0	0	0	0	0	0	0	0	0	0	0	0	0	0	0	0
A0A669D8T3	B30.2/SPRY domain-containing protein		Oreochromis niloticus (Nile tilapia) (Tilapia nilotica)				0.94627	-0.016497	EEPIRTVLTK	0	0	0	0	0	0	0	0	0	0	0	0	0	0	0	0	0	0	0	0	0	0	0	0	0	0	1743.9	0	0	0	0	0	0	0	0	0	0	0	0	0
A0A669D8V4	Laminin subunit alpha 3		Oreochromis niloticus (Nile tilapia) (Tilapia nilotica)	anatomical structure development [GO:0048856]; cell adhesion [GO:0007155]	basement membrane [GO:0005604]		1.0007	-1.0518	ELKGLPK	0	0	0	0	0	0	0	0	0	0	0	0	0	0	0	0	0	0	0	0	0	0	0	0	0	0	1036.8	0	0	0	0	0	0	0	0	0	0	0	0	0
A0A669D8W0	Spectrin beta chain, non-erythrocytic 4	LOC100709524	Oreochromis niloticus (Nile tilapia) (Tilapia nilotica)			phospholipid binding [GO:0005543]	0.99655	-2.6774	LDSLLTK	0	0	0	0	0	0	0	0	0	0	0	0	0	0	0	0	0	0	0	0	0	0	0	0	0	0	0	0	0	0	0	0	0	0	0	0	0	0	0	0
A0A669D8Y9	BRCA1 interacting protein C-terminal helicase 1	brip1	Oreochromis niloticus (Nile tilapia) (Tilapia nilotica)	nucleobase-containing compound metabolic process [GO:0006139]	nucleus [GO:0005634]	ATP binding [GO:0005524]; DNA binding [GO:0003677]; DNA helicase activity [GO:0003678]; hydrolase activity, acting on acid anhydrides, in phosphorus-containing anhydrides [GO:0016818]	1.0006	-2.231	KQSLASR	0	0	0	0	0	0	0	0	0	0	0	0	0	0	0	0	0	0	0	0	0	0	0	0	0	0	0	0	0	0	0	0	0	0	0	0	0	5077.1	0	0
A0A669D957	Keratin, type II cytoskeletal 8	LOC100702519	Oreochromis niloticus (Nile tilapia) (Tilapia nilotica)		keratin filament [GO:0045095]		0	23.165	FASFIDK	0	0	0	0	0	0	2562	2364.8	2109.2	0	0	0	0	0	0	0	0	0	0	0	455	8206.7	8610.9	8297	0	0	0	1357.3	810.47	1264.2	0	0	0	0	0	0	554.28	631.9	641.8	0
A0A669D959	Transcription factor HES-7	LOC100700632	Oreochromis niloticus (Nile tilapia) (Tilapia nilotica)			protein dimerization activity [GO:0046983]	1.0007	-1.0518	VPKQPQK	0	0	0	0	0	0	38923	0	0	0	0	0	0	0	0	0	0	0	0	0	0	0	0	0	0	0	0	29769	0	0	0	0	0	0	0	0	0	0	0	0
A0A669D973	Target of EGR1, exonuclease	toe1	Oreochromis niloticus (Nile tilapia) (Tilapia nilotica)			metal ion binding [GO:0046872]; nucleic acid binding [GO:0003676]	1.0026	-1.4662	AAPLNVVK	0	0	0	0	0	0	0	0	0	0	0	0	0	0	0	0	0	0	0	0	0	0	0	0	13897	0	13864	0	0	0	0	0	0	0	5450.4	4588.4	0	0	0	0
A0A669D986	Ryanodine receptor 1b (skeletal)		Oreochromis niloticus (Nile tilapia) (Tilapia nilotica)	intracellular calcium ion homeostasis [GO:0006874]	sarcoplasmic reticulum membrane [GO:0033017]	calmodulin binding [GO:0005516]; ryanodine-sensitive calcium-release channel activity [GO:0005219]	1	-0.13665	LKDIVASDAFR	0	0	0	0	0	0	0	0	0	0	0	0	0	0	0	0	0	0	0	0	0	0	0	0	0	0	0	0	0	0	0	0	0	0	0	0	0	0	0	0
A0A669D9N3	Striatin interacting protein 2		Oreochromis niloticus (Nile tilapia) (Tilapia nilotica)				0.97958	-0.39719	REHFKESPLVK	0	0	0	0	0	0	0	0	0	0	0	0	0	0	0	0	0	0	0	0	0	0	0	0	0	0	0	0	0	0	0	0	0	0	0	0	0	0	0	0
A0A669D9S9	UNC homeobox	uncx	Oreochromis niloticus (Nile tilapia) (Tilapia nilotica)		nucleus [GO:0005634]	DNA binding [GO:0003677]; DNA-binding transcription factor activity, RNA polymerase II-specific [GO:0000981]	1.0048	-0.95364	ELSRLEK	0	0	0	0	0	0	0	0	0	0	0	0	0	0	0	0	0	0	0	0	0	0	0	0	0	0	0	0	0	0	0	0	0	0	0	0	0	0	0	0
A0A669D9U4	SLIT-ROBO Rho GTPase activating protein 1	srgap1	Oreochromis niloticus (Nile tilapia) (Tilapia nilotica)	signal transduction [GO:0007165]			0.96833	-0.096211	ILLTIPR	0	0	0	0	0	0	0	0	0	0	0	0	0	0	0	0	0	0	0	0	0	0	0	0	0	0	0	0	0	0	0	0	0	0	0	0	0	0	0	0
A0A669D9U8	Myosin ID	MYO1D	Oreochromis niloticus (Nile tilapia) (Tilapia nilotica)	system development [GO:0048731]	myosin complex [GO:0016459]	actin binding [GO:0003779]; ATP binding [GO:0005524]; cytoskeletal motor activity [GO:0003774]	0.98472	-0.49445	HVKWPTPPKVLR	0	0	0	0	0	0	0	0	0	0	0	0	0	0	0	0	0	0	0	0	0	0	834.17	954.75	0	0	0	0	0	0	0	0	0	0	0	0	0	0	0	0
A0A669D9Y9	RING-type E3 ubiquitin transferase (EC 2.3.2.27)	RNF5	Oreochromis niloticus (Nile tilapia) (Tilapia nilotica)	protein ubiquitination [GO:0016567]; ubiquitin-dependent protein catabolic process [GO:0006511]	endoplasmic reticulum [GO:0005783]	metal ion binding [GO:0046872]; ubiquitin protein ligase activity [GO:0061630]	0.9986	-1.003	LGGAVFR	0	0	0	0	0	0	0	0	0	0	0	0	0	0	0	0	0	0	0	0	0	1979.9	2062.6	2038.7	0	0	0	0	0	0	0	0	0	0	0	0	0	0	0	0
A0A669DA17	NACHT domain-containing protein		Oreochromis niloticus (Nile tilapia) (Tilapia nilotica)				1.0087	-1.5451	LLVGLLGQTKTIQR	0	0	0	0	0	0	0	0	0	0	0	0	0	0	0	0	0	0	0	0	0	0	0	0	0	0	0	0	0	0	0	0	0	0	0	0	0	0	0	0
A0A669DA30	Bucky ball		Oreochromis niloticus (Nile tilapia) (Tilapia nilotica)				1.0115	-1.3439	SLAKGTGR	0	0	0	0	0	0	0	0	0	0	0	0	0	0	0	0	0	0	0	0	0	0	0	0	0	0	0	0	0	0	0	0	0	0	0	0	0	0	0	0
A0A669DA51	Reverse transcriptase domain-containing protein		Oreochromis niloticus (Nile tilapia) (Tilapia nilotica)			catalytic activity [GO:0003824]	1.0048	-1.0937	INMIKMNILPK	0	0	0	0	0	0	0	0	0	0	0	0	0	0	0	0	0	0	0	0	0	0	0	0	0	0	0	0	0	0	0	0	0	0	0	0	0	0	0	0
A0A669DA65	Tensin-3	TNS3	Oreochromis niloticus (Nile tilapia) (Tilapia nilotica)		focal adhesion [GO:0005925]	phosphoprotein phosphatase activity [GO:0004721]	1.0022	-0.97329	GLSSREAVQR	0	0	0	0	0	0	0	0	0	475.95	610.55	0	0	0	0	402.73	405.29	431.54	0	0	0	0	0	0	0	0	0	594.35	625.4	608.24	0	0	0	299.01	0	0	0	0	0	0
A0A669DA97	Pleckstrin homology domain interacting protein		Oreochromis niloticus (Nile tilapia) (Tilapia nilotica)				1.0004	-0.92034	LSSLMWEVR	0	0	0	0	0	0	0	0	0	0	0	0	0	0	0	0	0	0	0	0	0	675.82	730.74	791.52	0	0	0	0	0	0	0	0	0	0	0	0	0	0	0	0
A0A669DAR2	GPI ethanolamine phosphate transferase 1 (EC 2.-.-.-)	pign	Oreochromis niloticus (Nile tilapia) (Tilapia nilotica)	GPI anchor biosynthetic process [GO:0006506]	endoplasmic reticulum membrane [GO:0005789]	mannose-ethanolamine phosphotransferase activity [GO:0051377]	0.99215	-0.33863	QRKMHFP	0	0	0	0	0	0	0	1362.1	0	0	0	0	0	0	0	0	0	0	0	0	0	0	0	0	0	0	0	0	0	0	0	0	0	0	0	0	0	0	0	0
A0A669DB04	alpha-1,2-Mannosidase (EC 3.2.1.-)		Oreochromis niloticus (Nile tilapia) (Tilapia nilotica)	carbohydrate metabolic process [GO:0005975]	membrane [GO:0016020]	calcium ion binding [GO:0005509]; mannosyl-oligosaccharide 1,2-alpha-mannosidase activity [GO:0004571]	0.991	-0.76452	TTPALLPLSGRR	0	0	0	0	0	0	0	0	0	0	0	0	0	0	0	0	0	0	0	0	0	0	0	0	0	0	0	0	0	0	0	0	0	0	0	0	0	0	0	0
A0A669DB14	Folliculin interacting protein 1	fnip1	Oreochromis niloticus (Nile tilapia) (Tilapia nilotica)		lysosomal membrane [GO:0005765]		1.0002	-1.6994	MPPTLFQK	0	0	0	0	0	0	0	0	0	0	0	0	0	0	0	0	0	0	0	0	0	0	0	0	0	0	0	0	0	0	0	0	0	0	0	0	0	0	0	0
A0A669DB22	Ig-like domain-containing protein		Oreochromis niloticus (Nile tilapia) (Tilapia nilotica)				0.99795	-1.0518	NPSYRGR	0	0	0	0	0	0	0	0	0	0	0	0	0	0	0	0	0	0	0	0	0	0	0	0	0	0	0	0	0	0	0	0	0	0	0	0	0	0	0	0
A0A669DB45	Neurobeachin a		Oreochromis niloticus (Nile tilapia) (Tilapia nilotica)		membrane [GO:0016020]		0.9969	-9.0243	IGTVLQLMHTLK	0	0	1000.8	0	0	0	0	0	0	0	0	0	0	0	0	729.87	0	0	0	0	0	0	0	0	608.94	0	0	0	0	0	0	0	0	0	0	0	0	0	0	0
A0A669DB61	Vacuolar protein sorting 13 homolog A		Oreochromis niloticus (Nile tilapia) (Tilapia nilotica)	lipid transport [GO:0006869]	lipid droplet [GO:0005811]		0.9972	-3.0168	DILPTIAL	0	0	0	0	0	0	0	0	0	0	0	0	0	0	0	585.88	0	0	0	0	0	0	0	0	0	0	0	0	0	0	0	0	0	0	0	0	0	0	0	0
A0A669DBD4	Ubiquinol-cytochrome c reductase, complex III subunit XI		Oreochromis niloticus (Nile tilapia) (Tilapia nilotica)	mitochondrial electron transport, ubiquinol to cytochrome c [GO:0006122]	mitochondrial respiratory chain complex III [GO:0005750]		1.0067	-1.3439	MVQKILNK	0	0	0	0	0	0	551.46	0	0	0	0	0	0	0	0	0	0	0	0	0	0	0	0	0	0	0	0	0	0	0	0	0	0	0	0	0	0	0	0	0
A0A669DBP6	Myosin, heavy chain 7B, cardiac muscle, beta b		Oreochromis niloticus (Nile tilapia) (Tilapia nilotica)	system development [GO:0048731]	myosin complex [GO:0016459]	actin filament binding [GO:0051015]; ATP binding [GO:0005524]; cytoskeletal motor activity [GO:0003774]	0.99668	-1.8311	QLSEVNAQK	0	0	0	0	0	0	0	0	1848.4	0	0	0	0	0	0	0	0	0	0	0	0	2126.9	0	3677.2	0	0	0	0	0	0	0	0	0	0	0	0	0	0	0	0
A0A669DBV2	Interferon-induced very large GTPase 1	LOC102077686	Oreochromis niloticus (Nile tilapia) (Tilapia nilotica)		cytoplasm [GO:0005737]; nucleus [GO:0005634]	GTP binding [GO:0005525]	1.0095	-1.2951	HTKAFITAAVEK	0	1174.4	0	0	1271.5	0	1067.2	0	0	0	0	0	0	0	0	1132.4	0	0	0	1325.1	1380.7	617.07	0	0	0	0	945.15	0	0	773.92	0	0	1007.4	648.33	730.13	636.87	0	0	0	0
A0A669DC24	Disintegrin and metalloproteinase domain-containing protein 10	LOC100707598	Oreochromis niloticus (Nile tilapia) (Tilapia nilotica)	proteolysis [GO:0006508]		metal ion binding [GO:0046872]; metalloendopeptidase activity [GO:0004222]	0.97152	-0.094134	VMTEEDKNDPLSPLYIGPEK	0	0	0	0	0	0	0	0	0	0	0	0	0	0	0	0	0	0	0	0	0	0	0	574.33	0	0	0	0	0	0	0	0	0	0	0	0	0	0	0	0
A0A669DC84	Phospholipase A1 member A	pla1a	Oreochromis niloticus (Nile tilapia) (Tilapia nilotica)	lipid metabolic process [GO:0006629]	extracellular region [GO:0005576]	carboxylic ester hydrolase activity [GO:0052689]; lipase activity [GO:0016298]; metal ion binding [GO:0046872]	0.99785	-5.394	ITGLDPAGPMFKGADTYSR	0	0	0	0	0	0	0	0	0	0	0	0	0	0	0	0	0	0	0	0	0	0	0	0	0	0	0	0	0	0	0	0	0	0	0	0	0	0	0	0
A0A669DC85	Ubiquitin-like domain-containing protein		Oreochromis niloticus (Nile tilapia) (Tilapia nilotica)				1.0039	-0.0032092	LIYQGRVLQDDR	0	0	0	0	0	0	0	0	0	0	0	0	0	0	0	0	0	0	0	0	0	0	0	0	0	0	0	0	0	0	0	0	0	0	0	0	0	0	0	0
A0A669DCG4	ABRA C-terminal like	heca	Oreochromis niloticus (Nile tilapia) (Tilapia nilotica)				0.99542	-0.13826	IVCIKCKSR	0	0	0	0	0	0	0	0	0	0	0	0	0	0	0	0	0	0	0	0	0	0	0	0	0	0	0	0	0	0	0	0	0	0	0	0	0	0	0	0
A0A669DCN3	ATP-dependent DNA helicase (EC 3.6.4.12)		Oreochromis niloticus (Nile tilapia) (Tilapia nilotica)	DNA recombination [GO:0006310]; DNA repair [GO:0006281]; telomere maintenance [GO:0000723]		ATP binding [GO:0005524]; DNA helicase activity [GO:0003678]; hydrolase activity [GO:0016787]	0.98216	-0.53383	RITRTYR	0	0	0	0	0	0	0	0	0	0	0	0	0	0	0	0	0	0	0	0	0	0	0	0	0	0	0	0	0	0	0	0	0	0	0	0	0	0	0	0
A0A669DCN6	Lysyl oxidase homolog (EC 1.4.3.13)	LOXL4	Oreochromis niloticus (Nile tilapia) (Tilapia nilotica)	peptidyl-lysine oxidation [GO:0018057]	extracellular space [GO:0005615]; membrane [GO:0016020]	copper ion binding [GO:0005507]; protein-lysine 6-oxidase activity [GO:0004720]; scavenger receptor activity [GO:0005044]	0.99722	-1.0301	NGRAPPVVR	0	0	0	0	0	0	0	0	0	0	0	0	0	0	0	0	0	0	0	0	0	0	0	0	0	0	0	0	0	0	0	0	0	0	0	0	0	0	0	0
A0A669DCX9	Myosin tail domain-containing protein		Oreochromis niloticus (Nile tilapia) (Tilapia nilotica)		myosin complex [GO:0016459]		1.0027	-1.4034	WETTRIGANHYK	0	0	0	0	0	0	0	0	0	0	0	0	0	0	0	0	0	0	0	0	0	0	0	0	0	0	0	0	0	0	0	0	0	0	0	0	0	0	0	0
A0A669DD84	Reversion inducing cysteine rich protein with kazal motifs	reck	Oreochromis niloticus (Nile tilapia) (Tilapia nilotica)	negative regulation of metalloendopeptidase activity [GO:1904684]	membrane [GO:0016020]	metalloendopeptidase inhibitor activity [GO:0008191]	0.9962	-2.9651	EYCQAIFRTDSTPTVSQISAVK	0	0	0	0	0	0	0	1249.1	0	0	0	0	0	0	0	0	0	0	0	0	0	0	0	0	0	0	0	0	0	0	0	0	0	0	0	0	0	0	0	0
A0A669DDB8	G-protein coupled receptors family 1 profile domain-containing protein		Oreochromis niloticus (Nile tilapia) (Tilapia nilotica)		membrane [GO:0016020]	G protein-coupled receptor activity [GO:0004930]	0.99794	-1.0301	LLLTRGFQK	0	0	0	0	0	0	0	0	0	0	0	0	0	0	0	0	0	0	0	0	0	0	0	0	0	0	0	0	0	0	0	1619	0	0	0	0	0	0	0	0
A0A669DDD2	Gastrula zinc finger protein XlCGF42.1	LOC106096453	Oreochromis niloticus (Nile tilapia) (Tilapia nilotica)				1.0118	-1.1741	YSGDVSR	0	0	0	0	0	0	0	0	0	0	0	0	0	0	0	0	0	0	0	0	0	0	0	0	0	841.81	0	0	0	0	0	0	0	0	0	0	0	0	0	0
A0A669DDI3	Class II major histocompatibility complex transactivator	ciita	Oreochromis niloticus (Nile tilapia) (Tilapia nilotica)				1.0053	-1.4662	LVNIHIHK	0	0	0	0	0	0	0	0	0	0	0	0	0	0	0	0	0	0	0	0	0	0	0	0	0	0	0	0	0	0	0	0	0	0	0	0	0	0	0	0
A0A669DDI6	RPA-related protein RADX	LOC102077348	Oreochromis niloticus (Nile tilapia) (Tilapia nilotica)			single-stranded DNA binding [GO:0003697]	0.98674	-0.59014	GAVQHELIVRIINK	0	0	0	0	0	0	0	0	0	0	0	0	0	0	0	0	0	0	0	0	0	0	0	0	0	0	0	0	0	0	0	0	0	0	0	0	0	0	0	0
A0A669DDL7	CUB domain containing protein 1a		Oreochromis niloticus (Nile tilapia) (Tilapia nilotica)		membrane [GO:0016020]		1.0048	-1.0956	INVTAGSIAK	0	0	0	0	0	0	0	0	0	0	0	0	0	0	0	0	0	0	0	0	0	0	0	0	0	0	0	0	0	0	0	0	0	0	0	0	0	0	507.44	0
A0A669DDQ3	Acetyl-coenzyme A synthetase (EC 6.2.1.1)	acss2	Oreochromis niloticus (Nile tilapia) (Tilapia nilotica)	acetyl-CoA biosynthetic process from acetate [GO:0019427]; lipid metabolic process [GO:0006629]		acetate-CoA ligase activity [GO:0003987]; AMP binding [GO:0016208]; ATP binding [GO:0005524]	1.0064	-1.5166	LINLKLLADEALQKCR	0	0	0	0	0	0	0	0	0	0	0	0	0	0	0	0	0	0	0	0	0	0	0	0	0	0	0	0	0	0	0	0	0	0	0	0	0	0	0	0
A0A669DDY1	Vav guanine nucleotide exchange factor 1	VAV1	Oreochromis niloticus (Nile tilapia) (Tilapia nilotica)	intracellular signal transduction [GO:0035556]		guanyl-nucleotide exchange factor activity [GO:0005085]	0.99455	-0.82738	LSNAREDIR	0	0	0	0	0	448.24	0	0	0	0	0	0	0	0	0	0	0	0	0	0	0	0	0	0	0	0	0	0	0	0	0	0	0	337.41	0	0	0	0	0	0
A0A669DDY9	Laminin, beta 4		Oreochromis niloticus (Nile tilapia) (Tilapia nilotica)	anatomical structure development [GO:0048856]	basement membrane [GO:0005604]; membrane [GO:0016020]		0.98981	-0.72335	SISAFNLYL	0	0	0	0	0	0	0	521.74	0	0	0	0	445.15	0	0	0	0	0	0	0	0	0	0	0	0	0	0	0	0	0	0	568.14	0	0	0	0	0	531.64	0	0
A0A669DE72	Uncharacterized protein		Oreochromis niloticus (Nile tilapia) (Tilapia nilotica)				1.0125	-0.20806	ENFQKEKDEMK	0	0	0	0	0	0	0	0	0	0	0	0	0	0	0	0	0	0	0	0	0	0	0	0	0	0	0	0	0	0	0	0	0	0	0	0	0	0	0	0
A0A669DE80	Major facilitator superfamily domain containing 10	mfsd10	Oreochromis niloticus (Nile tilapia) (Tilapia nilotica)		membrane [GO:0016020]	transmembrane transporter activity [GO:0022857]	1.0124	-1.1741	VSCGDCR	0	0	0	0	0	0	2092.1	0	0	0	0	0	0	0	0	0	0	1109.8	0	1979.4	0	0	0	0	0	3132.9	0	0	0	0	0	0	0	0	0	0	0	0	0	0
A0A669DEC0	Calcium voltage-gated channel auxiliary subunit alpha2delta 2	cacna2d2	Oreochromis niloticus (Nile tilapia) (Tilapia nilotica)	regulation of monoatomic ion transmembrane transport [GO:0034765]	membrane [GO:0016020]	calcium channel activity [GO:0005262]; voltage-gated monoatomic ion channel activity [GO:0005244]	1.0139	-1.1741	YGSTLAR	0	0	0	0	0	2887.3	0	0	0	0	0	0	0	0	0	0	0	0	0	0	0	0	0	0	0	7198.4	0	0	0	0	0	0	0	0	0	0	0	0	0	0
A0A669DEE6	DEP domain-containing protein 7	LOC100711448	Oreochromis niloticus (Nile tilapia) (Tilapia nilotica)	intracellular signal transduction [GO:0035556]			1.0072	-1.2208	DVFQDSKSAFYR	0	0	0	0	0	0	0	0	0	0	0	0	0	0	0	0	0	0	0	0	0	0	0	0	0	0	0	0	0	0	0	0	0	0	0	0	0	0	0	0
A0A669DEL8	Protein kinase C and casein kinase substrate in neurons protein 3	LOC100691076	Oreochromis niloticus (Nile tilapia) (Tilapia nilotica)				0.99403	-0.33863	VRARYEK	0	0	0	1216.9	0	0	0	1277.5	0	0	0	1289.8	0	956.4	0	0	0	0	0	0	0	0	0	0	3065.6	0	0	0	0	0	0	0	0	1294.5	0	0	0	0	0	0
A0A669DEQ0	Calpain-1 catalytic subunit	LOC100691068	Oreochromis niloticus (Nile tilapia) (Tilapia nilotica)	proteolysis [GO:0006508]		calcium ion binding [GO:0005509]; calcium-dependent cysteine-type endopeptidase activity [GO:0004198]	1.0047	-0.97329	VFIISDKDLK	0	0	0	0	0	0	0	0	0	0	0	0	0	0	0	0	413.12	0	0	0	0	0	0	0	0	0	0	0	0	0	0	0	0	0	0	0	0	0	0	0
A0A669DEQ1	Mitochondrial intermediate peptidase		Oreochromis niloticus (Nile tilapia) (Tilapia nilotica)	proteolysis [GO:0006508]	mitochondrion [GO:0005739]	metal ion binding [GO:0046872]; metalloendopeptidase activity [GO:0004222]	1.0023	-2.1835	APFCANSLRFR	0	0	0	0	0	0	0	714.25	0	0	0	0	0	0	0	0	0	0	0	0	0	0	0	1030.4	0	0	0	0	0	0	0	0	0	0	0	0	0	0	0	0
A0A669DES9	Calcium voltage-gated channel auxiliary subunit alpha2delta 2	cacna2d2	Oreochromis niloticus (Nile tilapia) (Tilapia nilotica)	calcium ion transport [GO:0006816]	membrane [GO:0016020]		0.99614	-2.6823	DLVERVAR	0	0	0	0	0	0	0	0	0	0	0	0	0	0	0	0	0	0	0	0	0	736.01	0	702.23	0	0	0	0	0	0	0	0	0	0	0	0	0	0	0	0
A0A669DEX4	Membrane magnesium transporter	mmgt1	Oreochromis niloticus (Nile tilapia) (Tilapia nilotica)	establishment of localization [GO:0051234]	early endosome membrane [GO:0031901]; EMC complex [GO:0072546]; Golgi membrane [GO:0000139]		1	-0.036125	VAAVYDTVLRHR	0	0	0	0	0	0	0	0	0	0	0	0	0	0	0	0	0	0	0	0	0	0	0	4026.4	0	0	0	0	0	0	0	0	0	0	0	0	0	0	0	0
A0A669DEY3	Ubiquitin carboxyl-terminal hydrolase 43	LOC100690273	Oreochromis niloticus (Nile tilapia) (Tilapia nilotica)	protein deubiquitination [GO:0016579]; ubiquitin-dependent protein catabolic process [GO:0006511]		cysteine-type deubiquitinase activity [GO:0004843]	1.0077	-1.5705	VGLAVPLFGSVAFLR	0	0	0	0	0	0	0	0	0	0	0	0	0	0	0	0	0	0	0	0	0	0	0	0	0	0	0	0	0	0	0	0	0	0	0	0	0	0	0	0
A0A669DF21	Eukaryotic translation initiation factor 5B (Translation initiation factor IF-2)		Oreochromis niloticus (Nile tilapia) (Tilapia nilotica)		cellular anatomical entity [GO:0110165]	GTP binding [GO:0005525]; GTPase activity [GO:0003924]; translation initiation factor activity [GO:0003743]	1.0111	-1.1531	ITRASIDALKNWFR	0	0	0	0	0	0	0	0	0	0	0	0	0	0	0	0	0	0	0	0	0	0	0	0	0	0	0	0	0	0	0	0	0	0	0	0	0	0	0	0
A0A669DF60	Coiled-coil domain containing 171		Oreochromis niloticus (Nile tilapia) (Tilapia nilotica)				0.99346	-0.63073	GLLSRSRK	0	0	0	0	0	0	0	0	0	531.53	640.34	0	0	0	0	0	0	0	0	0	0	0	0	0	0	0	0	0	0	0	0	0	459.71	0	0	573.91	0	0	0	0
A0A669DFS1	Myosin X, like 1		Oreochromis niloticus (Nile tilapia) (Tilapia nilotica)	signal transduction [GO:0007165]	myosin complex [GO:0016459]	actin binding [GO:0003779]; ATP binding [GO:0005524]; cytoskeletal motor activity [GO:0003774]	1.0072	-1.2251	AYINMVVKKR	0	0	0	0	0	0	0	0	0	0	0	0	0	0	0	0	0	0	0	0	0	0	0	0	0	0	0	0	0	0	0	0	0	0	0	0	0	0	0	0
A0A669DFS6	Serine/threonine-protein kinase DCLK1	LOC100704088	Oreochromis niloticus (Nile tilapia) (Tilapia nilotica)	intracellular signal transduction [GO:0035556]; protein phosphorylation [GO:0006468]	cytoplasm [GO:0005737]	ATP binding [GO:0005524]; protein kinase activity [GO:0004672]	1.0142	-1.1741	AGSPETR	0	0	0	0	0	0	0	2730.7	0	0	0	0	0	0	0	0	0	0	0	0	0	0	1084.7	1108.9	0	0	0	0	0	0	0	0	0	0	0	0	0	0	0	0
A0A669DFT3	DUF3715 domain-containing protein		Oreochromis niloticus (Nile tilapia) (Tilapia nilotica)	negative regulation of gene expression, epigenetic [GO:0045814]			1.0158	-1.1741	TNEGVNK	0	0	0	0	0	0	0	1991.5	0	0	0	0	0	0	0	0	0	0	1586.4	0	0	0	0	0	0	0	0	0	0	0	0	0	0	0	0	0	0	0	896.92	0
A0A669DFV0	Reelin	RELN	Oreochromis niloticus (Nile tilapia) (Tilapia nilotica)	central nervous system development [GO:0007417]; neuron migration [GO:0001764]	extracellular region [GO:0005576]	hydrolase activity [GO:0016787]; lipoprotein particle receptor binding [GO:0070325]; metal ion binding [GO:0046872]	1.0032	-1.4662	ITLSLPQK	0	0	0	0	2912.8	0	0	0	0	0	0	0	0	0	0	0	0	0	0	0	0	0	0	0	7951.9	0	8699.8	0	0	0	0	0	0	0	0	3125.8	0	0	0	0
A0A669DFZ1	Structural maintenance of chromosomes flexible hinge domain containing 1	smchd1	Oreochromis niloticus (Nile tilapia) (Tilapia nilotica)	chromosome organization [GO:0051276]; double-strand break repair [GO:0006302]	chromosome [GO:0005694]	ATP binding [GO:0005524]	1.0022	-1.6686	TIIDEERGK	4569.6	4712.6	3880.9	3098.5	3378.4	3004.2	5637	5830.6	5655.8	2773.5	2296.3	2750.7	1305	1254.3	1157.1	1541	1796.7	1546.6	4965	5498.1	5088.3	3983.8	3984.1	3405.4	0	2305.9	2367.3	9563.4	9202.9	9113.1	2663.2	2756.9	2607.4	1212.6	1213.6	0	5534.6	5786.4	5754.9	2321.6
A0A669DG58	Abl-interactor 2b		Oreochromis niloticus (Nile tilapia) (Tilapia nilotica)		cytoskeleton [GO:0005856]; filopodium [GO:0030175]; lamellipodium [GO:0030027]		1.0042	-1.4246	NRTYSSGSSGGSHPSSSR	0	0	0	1037.3	0	0	0	1111.9	0	0	0	0	0	0	0	0	0	0	0	0	0	0	0	0	0	0	0	0	0	0	0	1036.3	0	0	0	0	1276.7	0	0	949.65
A0A669DG84	Uncharacterized LOC100698726	LOC100698726	Oreochromis niloticus (Nile tilapia) (Tilapia nilotica)				1.01	-1.1524	EEIGPFTTR	0	0	0	0	0	0	0	0	0	0	0	0	0	0	0	0	0	0	0	0	0	0	0	0	0	0	0	0	0	0	0	0	0	0	0	0	0	0	0	0
A0A669DG89	Transmembrane protein 121-like	LOC100695516	Oreochromis niloticus (Nile tilapia) (Tilapia nilotica)		membrane [GO:0016020]		1.0044	-1.4662	TGNLLVYR	0	0	0	0	0	0	602.56	0	0	0	0	0	0	0	0	0	0	0	0	0	0	0	0	0	0	0	0	0	0	0	0	0	0	0	0	0	0	0	0	0
A0A669DGA9	Spastin	SPAST	Oreochromis niloticus (Nile tilapia) (Tilapia nilotica)	cell cycle [GO:0007049]; cell division [GO:0051301]	membrane [GO:0016020]	ATP binding [GO:0005524]; ATP hydrolysis activity [GO:0016887]	1.0023	-1.3831	LTLLETTLASKRR	0	0	0	0	0	0	945.22	0	0	0	0	0	0	0	0	0	0	0	0	0	0	0	0	0	0	0	0	0	579.35	0	0	0	0	0	0	0	0	0	0	0
A0A669DGL7	DNA damage-binding protein 1 (Damage-specific DNA-binding protein 1)	ddb1	Oreochromis niloticus (Nile tilapia) (Tilapia nilotica)	DNA repair [GO:0006281]; proteasome-mediated ubiquitin-dependent protein catabolic process [GO:0043161]; protein ubiquitination [GO:0016567]	nucleus [GO:0005634]	nucleic acid binding [GO:0003676]	1.0093	-1.1951	LYDGLFK	0	0	1290.4	0	0	0	0	0	0	0	0	0	0	0	0	0	757.72	0	0	0	0	557.19	525.74	460.77	3939.7	0	0	0	0	0	0	0	0	0	0	0	0	0	0	0
A0A669DGN1	THO complex 5	thoc5	Oreochromis niloticus (Nile tilapia) (Tilapia nilotica)		nucleus [GO:0005634]		1.0092	-0.26014	LNRLAHMRLK	0	0	0	0	0	0	0	0	0	0	0	0	0	0	0	0	0	0	0	0	0	0	0	0	0	0	0	0	0	0	0	0	0	0	0	0	0	0	0	0
A0A669DH52	Fibrinogen C domain containing 1	fibcd1	Oreochromis niloticus (Nile tilapia) (Tilapia nilotica)		membrane [GO:0016020]		1.0007	-0.28417	ADLQRAPVRGAR	0	0	0	0	0	0	0	0	0	0	0	0	0	0	0	0	0	0	0	0	0	0	0	0	0	0	0	0	0	0	0	0	0	0	0	0	0	0	0	0
A0A669DH77	NK2 homeobox 2a		Oreochromis niloticus (Nile tilapia) (Tilapia nilotica)		nucleus [GO:0005634]	DNA binding [GO:0003677]; DNA-binding transcription factor activity, RNA polymerase II-specific [GO:0000981]	1.0007	-1.0518	MNMRCLR	0	0	0	0	0	0	357.49	0	315.49	0	0	0	0	0	0	0	0	0	0	0	0	0	0	0	0	494.34	520.16	0	0	0	0	0	0	0	0	0	0	0	0	0
A0A669DH98	Dynein axonemal heavy chain 17		Oreochromis niloticus (Nile tilapia) (Tilapia nilotica)	microtubule-based movement [GO:0007018]	cytoplasm [GO:0005737]; dynein complex [GO:0030286]; microtubule [GO:0005874]; motile cilium [GO:0031514]	ATP binding [GO:0005524]; dynein intermediate chain binding [GO:0045505]; dynein light intermediate chain binding [GO:0051959]; minus-end-directed microtubule motor activity [GO:0008569]	0.99796	-2.5747	DRSWKAAK	0	0	0	0	0	0	103410	0	0	0	0	0	0	0	0	0	0	0	0	0	0	0	0	0	0	0	0	0	0	0	0	0	0	0	0	0	0	0	0	0
A0A669DHB4	Serine/threonine-protein phosphatase (EC 3.1.3.16)	PPP3CA	Oreochromis niloticus (Nile tilapia) (Tilapia nilotica)	calcineurin-mediated signaling [GO:0097720]		calmodulin binding [GO:0005516]; calmodulin-dependent protein phosphatase activity [GO:0033192]; myosin phosphatase activity [GO:0017018]	1.008	-1.3439	EKLQNAIK	0	0	0	0	0	0	0	0	0	0	0	0	0	0	0	0	0	0	0	0	0	0	0	0	0	0	0	0	0	0	0	0	0	0	0	0	0	0	0	0
A0A669DHF6	C2H2-type domain-containing protein		Oreochromis niloticus (Nile tilapia) (Tilapia nilotica)				0.98276	-0.45109	FASIPAEVKK	0	0	0	0	0	0	0	0	0	0	0	0	0	0	0	0	0	0	0	0	0	0	0	0	0	0	0	0	0	0	0	0	0	0	0	0	0	0	0	0
A0A669DHH8	Calpain catalytic domain-containing protein		Oreochromis niloticus (Nile tilapia) (Tilapia nilotica)	proteolysis [GO:0006508]		calcium-dependent cysteine-type endopeptidase activity [GO:0004198]	0.98506	-0.54768	KEIRLDR	0	0	0	0	0	0	0	0	0	0	0	0	0	0	0	0	0	0	0	0	0	0	0	0	0	0	0	0	0	0	0	0	0	0	0	0	0	0	0	0
A0A669DHT6	Cysteine and glycine-rich protein 2	LOC100698598	Oreochromis niloticus (Nile tilapia) (Tilapia nilotica)	animal organ development [GO:0048513]		metal ion binding [GO:0046872]	0.97619	-0.097655	NTCMLNKQLK	0	0	0	0	0	0	0	0	0	0	0	0	0	0	0	0	0	0	0	0	0	0	0	0	0	0	0	0	0	0	0	0	0	0	0	0	0	3129	0	2093.9
A0A669DHX9	C2H2-type domain-containing protein		Oreochromis niloticus (Nile tilapia) (Tilapia nilotica)				1.0126	-0.26014	GFTLKANLKK	0	0	0	0	0	0	0	0	0	0	0	0	0	0	0	0	0	0	0	0	0	0	0	0	0	0	0	0	0	0	0	0	0	0	892.04	0	0	0	0	0
A0A669DIC5	Structural maintenance of chromosomes 6		Oreochromis niloticus (Nile tilapia) (Tilapia nilotica)		chromosome [GO:0005694]		0.99669	-5.8186	GMSLKDFVKTNENTADITVK	0	0	0	0	0	0	0	0	0	0	0	0	0	0	0	0	0	0	0	0	0	0	0	0	0	0	0	0	0	0	0	0	0	0	0	0	0	0	0	0
A0A669DID2	Prostaglandin reductase 1 (EC 1.3.1.48) (EC 1.3.1.74) (15-oxoprostaglandin 13-reductase) (Dithiolethione-inducible gene 1 protein) (Leukotriene B4 12-hydroxydehydrogenase) (NAD(P)H-dependent alkenal/one oxidoreductase)	LOC100691639	Oreochromis niloticus (Nile tilapia) (Tilapia nilotica)		cytoplasm [GO:0005737]	13-prostaglandin reductase activity [GO:0036132]; 15-oxoprostaglandin 13-oxidase activity [GO:0047522]; 2-alkenal reductase [NAD(P)+] activity [GO:0032440]	1.0083	-1.3439	LFSKTHIK	0	0	0	0	0	0	0	0	0	0	0	0	0	0	0	0	0	0	0	0	0	0	0	0	0	0	0	0	0	0	0	0	0	0	0	0	489.48	0	0	0
A0A669DIG8	Keratin, type I cytoskeletal 50 kDa	LOC100698206	Oreochromis niloticus (Nile tilapia) (Tilapia nilotica)		intermediate filament [GO:0005882]	structural molecule activity [GO:0005198]	1	-0.0038604	LASDDFR	0	0	0	0	0	0	0	0	0	0	0	0	0	0	0	0	0	0	0	0	0	1759.6	1632.6	1734.5	0	0	0	0	0	0	0	0	0	0	0	0	0	0	0	0
A0A669DIL2	Uncharacterized LOC102081647	LOC102081647	Oreochromis niloticus (Nile tilapia) (Tilapia nilotica)				1.0114	-1.1667	RPRPNPR	0	1283.1	1058.9	1391.9	0	0	0	0	0	0	0	1109.1	0	0	0	0	0	0	1721.9	0	0	0	0	0	0	0	0	0	1276.1	0	0	0	0	893.22	0	0	1121.6	0	0	842.15
A0A669DIM3	ATP-binding cassette, sub-family A (ABC1), member 4b		Oreochromis niloticus (Nile tilapia) (Tilapia nilotica)		membrane [GO:0016020]	ABC-type transporter activity [GO:0140359]; ATP binding [GO:0005524]; ATP hydrolysis activity [GO:0016887]	0.99279	-0.33863	NWTLRKR	0	0	0	0	0	0	0	0	0	0	0	0	0	0	0	0	0	0	0	0	0	0	0	0	0	0	0	0	0	0	422.61	0	0	0	0	0	0	0	0	0
A0A669DIP1	Melanocortin 2 receptor accessory protein 2	mrap2	Oreochromis niloticus (Nile tilapia) (Tilapia nilotica)		endoplasmic reticulum membrane [GO:0005789]; plasma membrane [GO:0005886]		0.98339	-0.76167	SQTSARR	0	0	0	0	0	0	0	0	0	0	0	0	0	0	0	0	0	0	0	0	0	0	0	0	3199.5	0	0	0	0	0	0	0	0	0	1503.4	0	0	0	0	0
A0A669DIR4	Dipeptidyl aminopeptidase-like protein 6	LOC100710983	Oreochromis niloticus (Nile tilapia) (Tilapia nilotica)	proteolysis [GO:0006508]	membrane [GO:0016020]	serine-type peptidase activity [GO:0008236]	0	0.32427	SVLIATQLK	0	0	0	0	0	0	0	0	0	0	0	1807.3	0	0	0	0	0	0	1255	0	0	0	0	0	0	1322.5	0	0	0	0	0	0	0	0	0	0	0	0	1226.6	0
A0A669DIV7	DNA helicase (EC 3.6.4.12)		Oreochromis niloticus (Nile tilapia) (Tilapia nilotica)			ATP binding [GO:0005524]; ATP-dependent chromatin remodeler activity [GO:0140658]; hydrolase activity [GO:0016787]	1.0066	-1.5579	IGQSKSVKIYR	0	0	0	0	0	3109.4	0	0	0	0	0	0	0	0	0	0	0	0	2679.4	0	0	0	1084.7	0	0	4085.3	0	0	1343.7	0	2424.8	0	0	0	0	0	2353.8	0	2340.5	0
A0A669DIY3	Migration and invasion inhibitory protein	miip	Oreochromis niloticus (Nile tilapia) (Tilapia nilotica)	negative regulation of cell migration [GO:0030336]; negative regulation of G2/M transition of mitotic cell cycle [GO:0010972]			1.0012	-2.3957	TRLLPPYK	0	0	0	0	0	0	0	541.42	0	0	2692.3	0	0	0	0	0	0	0	0	0	0	0	0	0	0	0	0	0	0	0	0	0	0	0	0	0	0	0	0	0
A0A669DIY7	Myosin VIIAb		Oreochromis niloticus (Nile tilapia) (Tilapia nilotica)	system development [GO:0048731]	cytoplasm [GO:0005737]; membrane [GO:0016020]; myosin complex [GO:0016459]; plasma membrane bounded cell projection [GO:0120025]	actin binding [GO:0003779]; ATP binding [GO:0005524]; cytoskeletal motor activity [GO:0003774]	1.0008	-0.19503	HLTDWIKKLR	0	0	0	0	0	0	0	0	0	0	0	0	0	0	0	0	0	0	0	0	0	0	0	0	0	0	0	0	0	0	0	0	0	0	0	0	0	0	0	0
A0A669DIZ6	Ubiquitin carboxyl-terminal hydrolase CYLD	LOC100700811	Oreochromis niloticus (Nile tilapia) (Tilapia nilotica)		microtubule organizing center [GO:0005815]; perinuclear region of cytoplasm [GO:0048471]		1.0036	-1.0851	CGDDQSGYNIPEVR	0	0	0	0	0	0	0	0	0	0	0	0	0	0	0	0	0	0	0	0	0	0	0	0	0	0	0	0	0	0	0	0	0	0	0	0	0	0	0	0
A0A669DJ26	Topoisomerase I binding, arginine/serine-rich a		Oreochromis niloticus (Nile tilapia) (Tilapia nilotica)			metal ion binding [GO:0046872]	1.0037	-0.96935	RCSVFRSR	0	0	0	0	985.5	0	0	0	0	0	0	0	0	0	792.18	0	0	0	0	0	0	0	1441.8	0	0	0	0	0	0	0	0	0	0	910.02	0	0	0	0	0	0
A0A669DJ43	Polypeptide N-acetylgalactosaminyltransferase (EC 2.4.1.-) (Protein-UDP acetylgalactosaminyltransferase)	galnt1	Oreochromis niloticus (Nile tilapia) (Tilapia nilotica)	protein glycosylation [GO:0006486]	Golgi membrane [GO:0000139]	carbohydrate binding [GO:0030246]; polypeptide N-acetylgalactosaminyltransferase activity [GO:0004653]	1.0004	-0.9237	HYYSLGEIR	0	0	0	0	0	0	0	0	0	0	0	0	0	0	0	0	0	0	0	0	0	0	0	0	0	0	0	0	0	0	0	0	0	0	0	0	0	0	0	0
A0A669DJ50	ribonuclease H (EC 3.1.26.4)		Oreochromis niloticus (Nile tilapia) (Tilapia nilotica)	DNA recombination [GO:0006310]; proteolysis [GO:0006508]; viral entry into host cell [GO:0046718]		aspartic-type endopeptidase activity [GO:0004190]; DNA-directed DNA polymerase activity [GO:0003887]; metal ion binding [GO:0046872]; RNA binding [GO:0003723]; RNA-directed DNA polymerase activity [GO:0003964]; RNA-DNA hybrid ribonuclease activity [GO:0004523]	0.99933	-1.7119	EAAPEEK	2832.1	3250.4	3005.4	0	3496.2	3659.2	4271.8	4032.4	4206.9	0	0	3684.3	3065.2	2767.4	2769.8	2466.3	2330.6	2411.2	0	3082.3	3615	0	0	1940.5	0	11224	0	1974.2	2024.6	0	2879.1	0	2740.6	3982.8	0	0	2033.6	0	2132.6	3293.8
A0A669DJ79	Beta-centractin	LOC100691670	Oreochromis niloticus (Nile tilapia) (Tilapia nilotica)				0.99932	-1.0518	DVSRYLR	0	0	0	0	0	0	0	0	0	0	0	0	0	0	0	0	0	0	0	0	0	0	0	0	0	0	0	0	0	0	0	0	0	0	0	0	0	0	0	0
A0A669DJD0	LIM zinc-binding domain-containing protein		Oreochromis niloticus (Nile tilapia) (Tilapia nilotica)	animal organ development [GO:0048513]		metal ion binding [GO:0046872]	0.9982	-3.1067	AISALYLSK	0	0	0	0	0	0	0	0	0	0	0	0	0	0	0	0	0	0	0	0	0	0	0	405.97	0	0	0	0	0	0	0	0	0	0	0	0	0	0	0	0
A0A669DJD1	Cadherin, EGF LAG seven-pass G-type receptor 2		Oreochromis niloticus (Nile tilapia) (Tilapia nilotica)	animal organ development [GO:0048513]; cell surface receptor signaling pathway [GO:0007166]; homophilic cell adhesion via plasma membrane adhesion molecules [GO:0007156]	plasma membrane [GO:0005886]	calcium ion binding [GO:0005509]; G protein-coupled receptor activity [GO:0004930]	0.99842	-3.5184	CELSSRSGR	0	0	0	0	0	0	0	0	0	0	0	0	0	0	0	0	0	0	0	0	0	0	0	0	0	0	0	0	0	0	0	0	0	0	0	0	0	0	0	0
A0A669DJE5	Myosin VAa		Oreochromis niloticus (Nile tilapia) (Tilapia nilotica)	system development [GO:0048731]	myosin complex [GO:0016459]	actin binding [GO:0003779]; ATP binding [GO:0005524]; cytoskeletal motor activity [GO:0003774]	1.0107	-1.1741	SQLVSQK	0	0	0	0	0	0	0	0	0	0	0	0	0	0	0	0	0	0	0	0	0	0	0	0	0	4648	0	0	0	0	0	0	0	0	0	0	0	0	0	0
A0A669DJI2	A disintegrin and metalloproteinase with thrombospondin motifs 20	ADAMTS20	Oreochromis niloticus (Nile tilapia) (Tilapia nilotica)	extracellular matrix organization [GO:0030198]; proteolysis [GO:0006508]	extracellular region [GO:0005576]	metalloendopeptidase activity [GO:0004222]; zinc ion binding [GO:0008270]	1.0035	-1.4032	ECQLFSTCREVQMR	0	0	0	0	0	0	0	0	0	0	0	0	0	0	0	0	0	0	0	0	0	573.93	0	0	0	0	0	0	0	0	0	0	0	0	0	0	0	0	0	0
A0A669DJN4	HECT domain E3 ubiquitin protein ligase 3	hectd3	Oreochromis niloticus (Nile tilapia) (Tilapia nilotica)			ubiquitin-protein transferase activity [GO:0004842]	0.99646	-1.8313	LIQAFMIKR	0	0	0	0	0	0	0	0	0	0	0	1142.8	0	0	0	0	0	0	0	0	0	0	0	0	0	0	0	0	0	0	0	0	0	0	0	0	0	0	0	0
A0A669DJP5	Tc1-like transposase DDE domain-containing protein		Oreochromis niloticus (Nile tilapia) (Tilapia nilotica)			nucleic acid binding [GO:0003676]	0.9976	-1.0301	LLKRDHQTIK	0	0	0	909.52	0	820.02	0	0	0	0	0	0	0	0	0	0	0	0	0	0	0	0	0	0	0	0	0	0	0	0	0	0	0	0	0	0	0	0	0	0
A0A669DK15	Tropomyosin 1	TPM1	Oreochromis niloticus (Nile tilapia) (Tilapia nilotica)		cytoskeleton [GO:0005856]	actin binding [GO:0003779]	0.99712	-1.8027	LATALTK	0	0	0	0	0	0	0	0	0	0	0	0	0	0	0	0	0	0	408.84	0	0	0	0	0	0	0	0	879.93	0	0	0	0	0	0	0	0	0	0	0	0
A0A669DK50	APC regulator of WNT signaling pathway 2	apc2	Oreochromis niloticus (Nile tilapia) (Tilapia nilotica)	cellular component organization [GO:0016043]; negative regulation of Wnt signaling pathway [GO:0030178]; Wnt signaling pathway [GO:0016055]	cell periphery [GO:0071944]; cytoplasm [GO:0005737]; intracellular membrane-bounded organelle [GO:0043231]	beta-catenin binding [GO:0008013]; microtubule binding [GO:0008017]	0.99741	-3.0639	SSSSDSSGRAK	0	0	0	0	0	0	0	0	0	0	0	0	0	0	0	0	0	0	0	0	0	0	0	0	0	0	0	0	0	0	0	0	0	0	0	0	273.64	0	0	0
A0A669DK85	Kinesin-like protein		Oreochromis niloticus (Nile tilapia) (Tilapia nilotica)	microtubule-based movement [GO:0007018]; system development [GO:0048731]	microtubule [GO:0005874]	ATP binding [GO:0005524]; microtubule binding [GO:0008017]; microtubule motor activity [GO:0003777]	0.998	-1.7883	HRLQQQELR	0	0	0	0	0	513.89	0	0	0	0	0	0	0	0	0	0	0	0	0	0	0	0	0	0	0	0	0	0	0	0	0	0	0	0	0	0	0	0	0	0
A0A669DK95	Si:ch1073-459j12.1		Oreochromis niloticus (Nile tilapia) (Tilapia nilotica)	proteolysis [GO:0006508]; regulation of response to external stimulus [GO:0032101]	extracellular region [GO:0005576]	metallocarboxypeptidase activity [GO:0004181]; zinc ion binding [GO:0008270]	0.037736	0.14122	PRTERAQK	0	0	0	0	1999.9	1960.2	0	2769.1	3265.2	0	0	0	0	0	0	0	1508.4	0	0	0	0	0	1554.2	0	0	0	0	0	0	0	1460.5	0	0	0	0	0	2491	2533	0	0
A0A669DKA6	ribonuclease H (EC 3.1.26.4)		Oreochromis niloticus (Nile tilapia) (Tilapia nilotica)	DNA integration [GO:0015074]		nucleic acid binding [GO:0003676]	0.99826	-1.0301	LIHVLERLR	0	0	0	0	0	0	0	0	0	0	0	0	0	0	0	0	0	0	0	0	0	0	0	0	0	0	0	0	0	0	0	0	0	0	0	0	415.12	0	0	0
A0A669DKE3	Potassium voltage-gated channel modifier subfamily V member 1	KCNV1	Oreochromis niloticus (Nile tilapia) (Tilapia nilotica)	protein homooligomerization [GO:0051260]; regulation of monoatomic ion transmembrane transport [GO:0034765]	voltage-gated potassium channel complex [GO:0008076]	voltage-gated potassium channel activity [GO:0005249]	0.95549	-0.018372	EQKESLEVQR	0	0	0	0	0	0	0	0	0	0	0	0	0	0	0	0	0	0	0	0	0	984.74	0	0	0	0	0	0	0	0	0	0	0	0	0	0	0	0	0	0
A0A669DKF0	Neuroepithelial cell transforming 1	NET1	Oreochromis niloticus (Nile tilapia) (Tilapia nilotica)	intracellular signal transduction [GO:0035556]		guanyl-nucleotide exchange factor activity [GO:0005085]	0.99614	-2.6385	LQGSVKR	0	0	0	0	0	0	1351.8	1078.1	0	0	0	0	0	0	0	0	0	0	0	0	0	0	0	1820.7	0	0	0	0	0	0	0	336.65	0	0	0	0	0	0	0	0
A0A669DKH7	Calcium/calmodulin-dependent protein kinase kinase 1	LOC100697126	Oreochromis niloticus (Nile tilapia) (Tilapia nilotica)	protein phosphorylation [GO:0006468]	cytoplasm [GO:0005737]	ATP binding [GO:0005524]; protein serine/threonine kinase activity [GO:0004674]	0.99368	-0.824	LSLQERGSR	0	67451	0	0	0	76468	0	83950	0	0	0	0	0	0	0	54942	46201	0	0	0	0	0	0	0	0	52060	0	0	73916	0	0	0	0	0	0	0	0	0	0	0
A0A669DKI9	TMEM9 domain family member B	tmem9b	Oreochromis niloticus (Nile tilapia) (Tilapia nilotica)		lysosomal membrane [GO:0005765]		1.001	-2.208	DVEAYCLR	990.55	0	0	0	0	0	0	0	1418.8	0	0	1330.1	999.22	918.79	1055.9	0	0	0	0	0	0	1690.8	1645.7	2064.8	0	0	0	0	0	0	0	0	0	0	0	0	0	0	0	0
A0A669DKR6	Sushi domain containing 1	susd1	Oreochromis niloticus (Nile tilapia) (Tilapia nilotica)	animal organ development [GO:0048513]	membrane [GO:0016020]	calcium ion binding [GO:0005509]	0.9873	-0.59014	YGFVGNGRTFCQDK	0	0	0	0	0	0	0	0	0	0	0	0	0	0	0	0	0	0	508.98	0	0	0	0	0	0	0	0	0	0	0	0	0	0	0	0	0	0	0	0	0
A0A669DKY7	NAD(P)H oxidase (H2O2-forming) (EC 1.6.3.1)	duox1	Oreochromis niloticus (Nile tilapia) (Tilapia nilotica)	hormone biosynthetic process [GO:0042446]; hydrogen peroxide catabolic process [GO:0042744]; response to oxidative stress [GO:0006979]; thyroid hormone generation [GO:0006590]	apical plasma membrane [GO:0016324]	calcium ion binding [GO:0005509]; heme binding [GO:0020037]; NAD(P)H oxidase H2O2-forming activity [GO:0016174]; peroxidase activity [GO:0004601]	0	3.459	LAWCSLLVNITWEVPR	0	0	0	0	0	0	0	0	0	0	0	0	0	0	0	0	0	0	0	0	0	869.23	849.99	646.28	0	0	0	0	0	0	0	0	0	0	0	0	0	0	0	0
A0A669DL02	Caspase 9	casp9	Oreochromis niloticus (Nile tilapia) (Tilapia nilotica)	proteolysis [GO:0006508]; regulation of apoptotic process [GO:0042981]		cysteine-type endopeptidase activity [GO:0004197]	0.96815	0.03328	QLVRDLETRGSR	0	0	0	0	0	0	0	0	0	0	0	0	0	0	0	0	0	0	0	0	0	1140.1	1004	969.77	0	0	0	0	0	0	0	0	0	0	0	0	0	0	0	0
A0A669DLC7	FA complementation group I	fanci	Oreochromis niloticus (Nile tilapia) (Tilapia nilotica)	DNA repair [GO:0006281]			0.99121	-0.31697	GKKVGTIIK	0	0	0	0	0	0	0	0	0	0	0	0	0	0	0	0	0	0	0	0	0	0	0	0	0	0	0	0	0	0	0	0	0	0	0	0	0	0	0	0
A0A669DLD1	DNA polymerase subunit gamma-1 (EC 2.7.7.7) (Mitochondrial DNA polymerase catalytic subunit)	polg	Oreochromis niloticus (Nile tilapia) (Tilapia nilotica)	DNA replication [GO:0006260]	gamma DNA polymerase complex [GO:0005760]; mitochondrial nucleoid [GO:0042645]	DNA binding [GO:0003677]; DNA-directed DNA polymerase activity [GO:0003887]	0.97422	-0.066896	ITRVASQSSRR	0	0	0	0	0	0	0	0	0	0	0	0	0	0	0	0	0	0	0	0	0	0	0	0	0	0	0	0	0	0	0	0	0	0	0	0	0	0	0	0
A0A669DLE2	Kelch repeat and BTB (POZ) domain containing 11		Oreochromis niloticus (Nile tilapia) (Tilapia nilotica)				0.99881	-3.2337	IYCVNRSR	0	0	0	0	0	0	0	0	0	0	0	0	0	0	0	0	0	0	0	0	0	0	0	0	731.49	0	0	0	0	0	0	0	0	0	0	0	0	0	0	0
A0A669DLI1	Reverse transcriptase domain-containing protein		Oreochromis niloticus (Nile tilapia) (Tilapia nilotica)			2-oxoglutarate-dependent dioxygenase activity [GO:0016706]; methyltransferase activity [GO:0008168]	1	-0.99766	LRDLGPNSR	0	0	0	0	0	0	1035.2	0	0	0	0	0	0	0	0	0	0	0	0	0	0	0	0	0	0	0	0	0	0	0	734.82	0	0	0	0	0	0	0	0	0
A0A669DLN8	Calcium channel, voltage-dependent, R type, alpha 1E subunit a	CACNA1E	Oreochromis niloticus (Nile tilapia) (Tilapia nilotica)	regulation of monoatomic ion transmembrane transport [GO:0034765]	voltage-gated calcium channel complex [GO:0005891]	metal ion binding [GO:0046872]; voltage-gated calcium channel activity [GO:0005245]	1.0124	-1.1524	HSAGSALTR	0	0	0	0	0	0	0	0	0	0	0	0	0	0	0	0	0	0	0	0	0	0	0	0	0	0	0	0	0	0	0	0	0	0	0	0	0	0	0	0
A0A669DLY3	Protein phosphatase 1 regulatory subunit	ppp1r12a	Oreochromis niloticus (Nile tilapia) (Tilapia nilotica)	signal transduction [GO:0007165]	cytoplasm [GO:0005737]	phosphatase regulator activity [GO:0019208]; protein kinase binding [GO:0019901]	1.0041	-1.6257	RQERYADR	0	0	0	0	0	0	0	0	0	0	0	0	0	0	0	0	0	0	0	0	0	0	0	0	0	0	0	0	0	0	0	0	0	0	0	0	0	0	0	0
A0A669DM07	dual-specificity kinase (EC 2.7.12.1)	LOC100711637	Oreochromis niloticus (Nile tilapia) (Tilapia nilotica)	protein phosphorylation [GO:0006468]	cytoplasm [GO:0005737]	ATP binding [GO:0005524]; protein serine/threonine/tyrosine kinase activity [GO:0004712]	1.0085	-1.3439	AKNFINSK	0	0	0	0	0	0	0	0	0	0	0	0	0	0	0	0	0	0	0	0	0	0	0	0	0	0	0	0	0	0	0	0	0	0	0	0	0	0	0	0
A0A669DM08	Transmembrane protein 132D		Oreochromis niloticus (Nile tilapia) (Tilapia nilotica)		membrane [GO:0016020]		1.0088	-1.3439	VTLNWKVK	0	2531.2	0	0	0	0	0	0	0	0	0	0	0	0	0	0	0	0	0	0	0	0	0	0	0	0	0	0	0	0	0	0	0	0	0	0	0	0	0	0
A0A669DMA6	Leucine rich repeat containing 49		Oreochromis niloticus (Nile tilapia) (Tilapia nilotica)				1.0153	-0.22406	LFGPGALKALERR	0	706.94	598.27	0	0	1151.6	402.76	375.36	0	0	0	0	0	0	0	0	0	0	0	0	381.06	0	0	0	0	0	0	0	0	0	0	0	0	0	0	0	0	0	0	329.94
A0A669DMD0	DNA mismatch repair protein	msh2	Oreochromis niloticus (Nile tilapia) (Tilapia nilotica)	mismatch repair [GO:0006298]	MutSalpha complex [GO:0032301]	ATP binding [GO:0005524]; ATP-dependent DNA damage sensor activity [GO:0140664]; mismatched DNA binding [GO:0030983]	1.0033	-0.97329	AVSIKQAFVI	0	0	0	1849.2	0	0	1686.6	0	0	0	0	0	1511.5	0	0	0	1480.9	0	1821	1861.4	0	0	0	0	0	0	0	1405.5	0	1378.3	1715.7	1619	0	0	0	0	0	0	0	0
A0A669DMN8	Zinc finger CCCH-type containing 12D	zc3h12d	Oreochromis niloticus (Nile tilapia) (Tilapia nilotica)			endonuclease activity [GO:0004519]; metal ion binding [GO:0046872]	0.99242	-0.005684	DLQTENPQWKK	0	0	0	0	0	0	0	0	0	0	0	0	0	0	0	0	0	0	0	0	0	3519.8	0	0	0	0	0	0	0	0	0	0	0	0	0	0	0	0	0	0
A0A669DMU5	Myosin tail domain-containing protein		Oreochromis niloticus (Nile tilapia) (Tilapia nilotica)		cytoskeleton [GO:0005856]	actin binding [GO:0003779]	1.0118	-1.1741	LAAALHK	0	0	0	0	0	0	0	0	0	0	0	0	0	0	0	0	0	0	0	0	0	0	0	0	13962	0	13137	0	0	0	0	0	0	0	4917.5	4256.9	0	0	0	0
A0A669DN44	Lamin B2	lmnb2	Oreochromis niloticus (Nile tilapia) (Tilapia nilotica)		intermediate filament [GO:0005882]; nuclear envelope [GO:0005635]		0	0.56159	LLEGEEHR	0	0	0	0	0	0	0	0	0	0	0	0	0	0	0	0	0	0	0	0	0	698.33	696.62	681.93	0	0	0	0	0	0	0	0	0	0	0	0	0	0	0	0
A0A669DN60	Reverse transcriptase domain-containing protein		Oreochromis niloticus (Nile tilapia) (Tilapia nilotica)				1.0024	-1.4662	YLGIAISR	0	0	0	0	0	0	0	0	0	0	0	0	0	0	0	0	0	0	0	0	0	0	0	0	0	0	0	0	0	0	0	0	0	0	0	0	0	0	0	0
A0A669DN70	Nucleoporin 160	nup160	Oreochromis niloticus (Nile tilapia) (Tilapia nilotica)	macromolecule localization [GO:0033036]; macromolecule metabolic process [GO:0043170]; nitrogen compound transport [GO:0071705]; nucleocytoplasmic transport [GO:0006913]; organic substance transport [GO:0071702]	nuclear pore [GO:0005643]		1.014	-1.1741	MAAALER	0	0	0	0	0	0	0	0	0	0	0	0	0	0	0	0	0	0	0	0	0	0	0	0	0	0	0	0	0	0	0	0	0	0	0	0	0	0	0	0
A0A669DNA8	[histone H3]-lysine(27) N-trimethyltransferase (EC 2.1.1.356)	EZH1	Oreochromis niloticus (Nile tilapia) (Tilapia nilotica)	histone H3-K27 methylation [GO:0070734]	nucleus [GO:0005634]	histone H3K27 trimethyltransferase activity [GO:0140951]	1.0089	-1.3439	LIGTKNCK	0	0	0	0	0	0	0	0	0	0	0	0	0	0	0	0	0	0	0	0	0	0	661.84	603.56	0	0	0	0	0	0	0	0	0	0	0	0	0	0	0	0
A0A669DNA9	Reverse transcriptase domain-containing protein		Oreochromis niloticus (Nile tilapia) (Tilapia nilotica)				1	-2.521	FGHISGYK	0	0	0	0	0	0	0	0	0	0	0	0	0	0	0	0	0	0	0	415.61	0	0	0	0	0	0	0	0	0	0	0	0	0	0	0	0	0	0	0	0
A0A669DNF6	dolichyl-diphosphooligosaccharide--protein glycotransferase (EC 2.4.99.18)	stt3a	Oreochromis niloticus (Nile tilapia) (Tilapia nilotica)	protein glycosylation [GO:0006486]	membrane [GO:0016020]	dolichyl-diphosphooligosaccharide-protein glycotransferase activity [GO:0004579]; metal ion binding [GO:0046872]	0.98359	-0.13938	IYKLFPKQK	0	0	0	5327.9	0	0	0	0	2041.9	0	0	3163.5	0	0	0	0	0	3231.5	0	0	0	0	3208.5	0	0	0	0	0	0	0	0	0	0	0	0	0	13997	0	0	0
A0A669DNL1	Doublecortin domain-containing protein		Oreochromis niloticus (Nile tilapia) (Tilapia nilotica)	intracellular signal transduction [GO:0035556]	cell projection [GO:0042995]; cytoplasm [GO:0005737]		1.0117	-1.1741	YDEAEDR	0	0	0	0	0	0	0	0	0	0	0	0	0	0	0	0	0	0	0	0	0	0	0	0	0	0	0	0	0	0	0	0	0	0	0	0	0	0	0	0
A0A669DNM8	Ig-like domain-containing protein		Oreochromis niloticus (Nile tilapia) (Tilapia nilotica)		membrane [GO:0016020]		0.99493	-0.63073	KRGGWLDR	0	0	0	0	802.72	0	0	0	0	0	0	0	0	0	0	0	0	0	0	0	0	0	0	0	0	0	0	0	0	0	0	0	0	0	0	0	0	0	0	0
A0A669DNR8	Cell adhesion molecule 2	cadm2	Oreochromis niloticus (Nile tilapia) (Tilapia nilotica)		membrane [GO:0016020]		1.0055	-0.9522	SSLQLQVDR	0	0	0	0	0	0	0	0	0	0	0	0	0	0	0	0	0	0	0	0	0	0	0	0	0	0	0	0	0	0	0	0	0	0	0	0	0	0	0	0
A0A669DNU0	Sideroflexin-1	LOC100709896	Oreochromis niloticus (Nile tilapia) (Tilapia nilotica)	amino acid transport [GO:0006865]	membrane [GO:0016020]; mitochondrion [GO:0005739]	monoatomic ion transmembrane transporter activity [GO:0015075]	1.0096	-1.1741	VTVENYR	0	0	0	0	0	0	0	0	0	0	0	0	0	0	0	0	0	0	0	0	0	0	0	0	0	0	2265.2	0	0	0	0	0	0	0	0	0	0	2373.5	0	0
A0A669DNU2	Tetratricopeptide repeat, ankyrin repeat and coiled-coil containing 1	tanc1	Oreochromis niloticus (Nile tilapia) (Tilapia nilotica)				1.0054	-1.6115	RGVLEPLANLR	0	0	0	0	0	0	0	0	0	0	0	0	0	0	0	0	0	0	0	0	0	0	0	0	0	0	0	0	0	0	0	0	0	0	0	0	0	0	0	0
A0A669DNX0	Pleckstrin homology domain-containing family G member 3	PLEKHG3	Oreochromis niloticus (Nile tilapia) (Tilapia nilotica)			guanyl-nucleotide exchange factor activity [GO:0005085]	1.0004	-2.4193	DPLLFSVIHFK	0	0	0	0	0	0	0	0	0	0	0	0	0	0	0	0	0	0	0	0	1061.6	0	0	0	0	0	0	0	0	0	0	0	0	0	0	0	0	0	0	0
A0A669DNX3	Stress-activated protein kinase JNK (EC 2.7.11.24)		Oreochromis niloticus (Nile tilapia) (Tilapia nilotica)	protein phosphorylation [GO:0006468]; rhythmic process [GO:0048511]	cytoplasm [GO:0005737]	ATP binding [GO:0005524]; MAP kinase activity [GO:0004707]; protein serine kinase activity [GO:0106310]	1.0073	-1.5548	ELIYKEVSEWEEWTR	2626.9	0	0	0	0	0	0	0	0	0	0	0	0	0	0	0	0	0	0	928.89	0	0	0	0	0	0	0	0	0	0	0	0	0	0	0	0	0	0	0	0
A0A669DP42	Kinesin-like protein	LOC100711338	Oreochromis niloticus (Nile tilapia) (Tilapia nilotica)	microtubule-based movement [GO:0007018]; system development [GO:0048731]	microtubule [GO:0005874]	ATP binding [GO:0005524]; microtubule binding [GO:0008017]; microtubule motor activity [GO:0003777]	0.98726	-0.76167	TADDQKK	0	0	0	0	0	0	0	0	0	0	0	0	0	0	0	0	0	0	1174.9	0	0	0	0	0	0	0	0	0	0	0	0	0	0	0	0	0	0	0	0	0
A0A669DP98	Tight junction protein 1b		Oreochromis niloticus (Nile tilapia) (Tilapia nilotica)	regulation of apoptotic process [GO:0042981]	bicellular tight junction [GO:0005923]; plasma membrane [GO:0005886]		1.0066	-1.6052	ILQQHREK	0	0	0	0	0	0	0	0	0	0	0	0	0	0	0	0	0	0	0	0	0	0	0	0	0	0	0	0	0	0	0	0	0	0	0	0	0	0	0	0
A0A669DPM4	C2H2-type domain-containing protein		Oreochromis niloticus (Nile tilapia) (Tilapia nilotica)				1.0103	-1.1741	YTAGLSR	0	0	0	0	0	2887.3	0	0	0	0	0	0	0	0	0	0	0	0	0	0	0	0	0	0	0	0	7808.2	0	0	0	0	0	0	0	0	0	0	0	0	0
A0A669DPT2	Beta-hexosaminidase (EC 3.2.1.52)	hexb	Oreochromis niloticus (Nile tilapia) (Tilapia nilotica)	carbohydrate derivative metabolic process [GO:1901135]; carbohydrate metabolic process [GO:0005975]	lysosome [GO:0005764]	beta-N-acetylhexosaminidase activity [GO:0004563]; N-acetyl-beta-D-galactosaminidase activity [GO:0102148]	1.0004	-2.2315	GTDEQKK	0	0	0	0	0	1360.4	0	0	0	0	0	0	0	0	0	0	0	0	0	0	0	0	0	0	0	0	0	0	0	0	0	0	0	0	0	0	0	0	0	0
A0A669DPW8	Tr-type G domain-containing protein	dmc1	Oreochromis niloticus (Nile tilapia) (Tilapia nilotica)			GTP binding [GO:0005525]; GTPase activity [GO:0003924]	0.9876	-0.76167	VGFNPKK	0	0	1954.8	0	0	0	0	0	0	0	0	0	0	0	0	0	0	0	0	0	0	0	0	0	0	0	0	0	0	0	0	0	0	0	0	0	0	0	0	0
A0A669DQA6	IQ motif containing K		Oreochromis niloticus (Nile tilapia) (Tilapia nilotica)				1.0059	-1.3439	WQRSSILR	0	0	0	0	0	0	0	0	0	0	0	0	0	0	0	0	0	0	0	0	0	0	0	0	0	0	0	0	0	0	0	0	0	0	0	0	0	0	0	0
A0A669DQC2	Erythrocyte membrane protein band 4.1 like 5	epb41l5	Oreochromis niloticus (Nile tilapia) (Tilapia nilotica)		cytoskeleton [GO:0005856]		0.99965	-0.99978	RLVPAHLK	0	0	0	0	0	0	0	375.47	387.02	0	0	0	0	0	0	0	0	0	0	0	0	501.99	0	522.35	0	0	0	0	0	0	0	0	0	0	0	0	0	0	0	0
A0A669DQC3	Down syndrome cell adhesion molecule	LOC100693769	Oreochromis niloticus (Nile tilapia) (Tilapia nilotica)	axon guidance [GO:0007411]; cell adhesion [GO:0007155]	plasma membrane [GO:0005886]		1.0132	-0.21371	AGPAAAR	0	0	0	0	0	0	0	0	0	0	31488	0	0	0	0	0	0	0	0	0	0	0	0	0	0	0	77114	0	0	0	0	0	0	40963	40121	0	0	0	0	0
A0A669DQD9	Cdc42-interacting protein 4 homolog	LOC100706729	Oreochromis niloticus (Nile tilapia) (Tilapia nilotica)	endocytosis [GO:0006897]; signal transduction [GO:0007165]	cytoplasm [GO:0005737]; plasma membrane [GO:0005886]		0.93571	0.039422	LQDLDEKR	773.42	0	0	0	0	825.82	0	0	1848.4	0	0	0	0	0	0	0	0	0	0	620.48	0	1912.7	0	0	0	0	0	974.02	0	0	0	579.77	0	0	0	0	0	489.58	472.4	605.72
A0A669DQG3	1-phosphatidylinositol 4-kinase (EC 2.7.1.67)		Oreochromis niloticus (Nile tilapia) (Tilapia nilotica)	phosphatidylinositol phosphate biosynthetic process [GO:0046854]; phosphatidylinositol-mediated signaling [GO:0048015]; phosphorylation [GO:0016310]		kinase activity [GO:0016301]	0.99955	-1.7263	APYLAKFKVK	0	0	0	0	0	0	0	0	0	0	0	0	0	0	0	0	0	0	0	0	0	0	0	0	0	0	0	0	0	0	2664.8	0	0	0	0	0	0	0	0	0
A0A669DQL3	Acyl-CoA thioesterase 9	acot9	Oreochromis niloticus (Nile tilapia) (Tilapia nilotica)			carboxylic ester hydrolase activity [GO:0052689]	0.99552	0.010148	TYGGEPVQTGNSKK	0	0	0	0	0	0	0	0	0	0	0	0	0	0	0	0	0	0	0	0	0	0	5438.3	0	0	0	0	0	0	0	0	0	0	0	0	0	0	0	0	0
A0A669DQL6	polynucleotide adenylyltransferase (EC 2.7.7.19)	LOC100690689	Oreochromis niloticus (Nile tilapia) (Tilapia nilotica)			poly(A) RNA polymerase activity [GO:1990817]	1.014	-1.1741	DDDGESK	0	0	0	0	0	0	0	0	0	0	0	0	0	0	0	0	0	0	0	0	0	0	0	0	0	0	0	0	0	0	0	0	0	0	0	0	0	0	0	0
A0A669DQW8	Structural maintenance of chromosomes protein 1B	LOC100692924	Oreochromis niloticus (Nile tilapia) (Tilapia nilotica)	sister chromatid cohesion [GO:0007062]	cohesin complex [GO:0008278]; nucleus [GO:0005634]	ATP binding [GO:0005524]; ATP hydrolysis activity [GO:0016887]	0.99431	-0.13828	LLIDYSELETDTK	868.36	0	0	0	0	0	1125.4	1074.1	917.7	436.09	0	0	0	0	0	0	0	0	0	0	0	0	0	0	0	0	0	0	886.47	0	0	0	0	0	0	0	0	477.72	338.1	0
A0A669DQX1	Photoreceptor-specific nuclear receptor	NR2E3	Oreochromis niloticus (Nile tilapia) (Tilapia nilotica)		nucleus [GO:0005634]	DNA-binding transcription factor activity [GO:0003700]; sequence-specific DNA binding [GO:0043565]; zinc ion binding [GO:0008270]	0.99253	-0.32188	AIVLFKPETRGLK	0	0	0	0	0	0	0	0	0	0	0	0	0	0	0	0	0	0	0	0	0	0	0	0	0	0	0	0	0	0	0	0	0	0	0	0	0	0	0	0
A0A669DQX7	Serine protease 23	PRSS35	Oreochromis niloticus (Nile tilapia) (Tilapia nilotica)	proteolysis [GO:0006508]		serine-type endopeptidase activity [GO:0004252]	0.99388	-0.33863	GLNRVRR	0	0	0	0	0	0	0	0	0	0	0	0	0	0	0	0	0	0	0	0	0	0	0	0	0	0	0	0	0	0	0	0	0	0	0	0	0	0	0	0
A0A669DR00	Zinc finger, MYND-type containing 11		Oreochromis niloticus (Nile tilapia) (Tilapia nilotica)	regulation of transcription elongation by RNA polymerase II [GO:0034243]		metal ion binding [GO:0046872]; transcription corepressor activity [GO:0003714]	1.0109	-1.1741	THTVEPK	0	0	0	0	0	0	0	0	0	0	0	0	0	0	0	0	0	0	0	0	0	0	0	0	0	0	0	0	0	0	0	0	0	0	0	0	0	0	0	0
A0A669DR11	Zinc finger HIT-type containing 6	ZNHIT6	Oreochromis niloticus (Nile tilapia) (Tilapia nilotica)				0.99442	-0.33473	LIFPQSSSEFTQR	0	0	0	0	0	0	0	0	0	0	0	0	0	0	0	0	0	0	0	0	0	0	0	0	0	0	0	0	0	0	0	0	523.12	0	0	0	0	0	0	0
A0A669DR51	Voltage-dependent R-type calcium channel subunit alpha-1E	CACNA1E	Oreochromis niloticus (Nile tilapia) (Tilapia nilotica)	regulation of monoatomic ion transmembrane transport [GO:0034765]	voltage-gated calcium channel complex [GO:0005891]	metal ion binding [GO:0046872]; voltage-gated calcium channel activity [GO:0005245]	0.98586	-0.76167	RQQQVER	0	0	0	0	0	0	0	0	0	0	0	0	0	0	0	0	0	0	0	0	0	0	0	0	0	0	0	0	0	0	0	0	0	0	0	0	0	0	0	0
A0A669DR74	Ribonucleoside-diphosphate reductase subunit M2	RRM2	Oreochromis niloticus (Nile tilapia) (Tilapia nilotica)	deoxyribonucleotide biosynthetic process [GO:0009263]		oxidoreductase activity [GO:0016491]	1.0034	-1.4662	VGVGLMFK	0	0	0	0	0	0	0	0	0	0	0	0	0	0	0	0	0	0	0	0	0	0	0	0	0	0	0	0	0	0	0	0	0	0	0	0	0	0	0	0
A0A669DRC1	Rho guanine nucleotide exchange factor 12	LOC100708196	Oreochromis niloticus (Nile tilapia) (Tilapia nilotica)	intracellular signal transduction [GO:0035556]; RNA processing [GO:0006396]	cytoplasm [GO:0005737]; membrane [GO:0016020]	adenosine deaminase activity [GO:0004000]; guanyl-nucleotide exchange factor activity [GO:0005085]; RNA binding [GO:0003723]	1.0029	-0.97329	IKFPNIRPPR	0	0	0	0	0	0	0	0	0	0	0	0	0	0	0	0	0	0	0	0	0	0	0	0	0	0	0	0	0	0	0	0	0	0	0	0	0	0	0	0
A0A669DRF5	FA complementation group E	fance	Oreochromis niloticus (Nile tilapia) (Tilapia nilotica)	interstrand cross-link repair [GO:0036297]	Fanconi anaemia nuclear complex [GO:0043240]		1.007	-0.91394	SLMSGTSGTSR	0	0	0	0	1028	955.39	0	0	0	0	0	0	0	0	0	0	0	0	0	0	0	0	0	0	0	0	0	0	0	0	0	0	0	0	0	0	0	0	0	0
A0A669DRF7	Cerebellin-2	LOC100704869	Oreochromis niloticus (Nile tilapia) (Tilapia nilotica)				1.0034	-1.4662	GTLMGGWK	0	0	0	0	0	0	0	0	0	0	0	0	0	0	0	0	0	0	0	0	0	0	0	0	0	0	0	0	0	0	0	0	0	0	0	0	0	0	0	0
A0A669DRG3	BED-type domain-containing protein		Oreochromis niloticus (Nile tilapia) (Tilapia nilotica)		nucleus [GO:0005634]	DNA binding [GO:0003677]; metal ion binding [GO:0046872]; protein dimerization activity [GO:0046983]	0.99791	-1.0301	CIVEKIPTK	0	0	0	0	0	0	0	0	0	0	0	0	0	0	0	0	0	0	0	0	0	0	0	0	0	0	0	0	0	0	0	0	0	0	0	0	0	0	0	0
A0A669DRG5	Coiled-coil domain containing 112	ccdc112	Oreochromis niloticus (Nile tilapia) (Tilapia nilotica)				1.0036	-1.4662	LPAAPTVR	0	0	0	32917	0	29236	0	0	37297	30074	0	0	27634	28281	0	0	0	17346	0	35179	0	0	0	0	28232	0	26610	0	0	0	0	35077	29799	0	0	24827	0	0	0	0
A0A669DRQ3	DAB2 interacting protein	dab2ip	Oreochromis niloticus (Nile tilapia) (Tilapia nilotica)	regulation of GTPase activity [GO:0043087]		GTPase activator activity [GO:0005096]	0.98837	-0.59014	QYQQEIALLQEKLR	0	0	0	0	0	0	0	0	0	0	0	0	0	0	0	0	0	0	0	0	0	0	0	0	0	0	0	0	0	0	0	0	0	0	0	0	0	0	0	0
A0A669DS14	Sortilin related VPS10 domain containing receptor 1		Oreochromis niloticus (Nile tilapia) (Tilapia nilotica)		membrane [GO:0016020]		1.0035	-1.4035	WRGKELLLK	0	0	0	0	0	0	0	0	0	0	0	0	0	0	0	0	0	0	0	0	0	0	0	0	0	0	0	0	0	0	0	0	0	0	0	0	0	0	0	0
A0A669DSB9	Matrix metalloproteinase-17	LOC100702797	Oreochromis niloticus (Nile tilapia) (Tilapia nilotica)	proteolysis [GO:0006508]	extracellular matrix [GO:0031012]	metalloendopeptidase activity [GO:0004222]; zinc ion binding [GO:0008270]	1	-2.425	AIKAMQK	0	0	0	0	0	0	0	0	0	0	0	0	0	0	0	0	0	0	0	0	0	0	0	0	0	0	0	0	0	0	0	0	0	0	0	0	0	0	0	0
A0A669DSJ1	Protocadherin 2 alpha a 15		Oreochromis niloticus (Nile tilapia) (Tilapia nilotica)	homophilic cell adhesion via plasma membrane adhesion molecules [GO:0007156]	plasma membrane [GO:0005886]	calcium ion binding [GO:0005509]	1.0066	-1.5548	QYRLEISESVLPGLR	0	0	0	0	0	0	724.22	753.5	810.43	0	0	0	0	0	0	0	0	0	0	0	0	0	410.05	0	0	0	0	0	0	361.8	0	0	0	0	0	0	0	0	0	0
A0A669DSK3	Vesicular glutamate transporter 1	LOC100692232	Oreochromis niloticus (Nile tilapia) (Tilapia nilotica)		membrane [GO:0016020]	transmembrane transporter activity [GO:0022857]	1.0106	-1.1741	CIFDACR	0	0	0	0	0	0	0	0	0	0	0	0	0	0	0	0	0	0	0	0	0	0	0	0	0	0	0	0	0	0	0	0	0	0	0	0	0	0	0	0
A0A669DSK5	Reverse transcriptase domain-containing protein		Oreochromis niloticus (Nile tilapia) (Tilapia nilotica)			catalytic activity [GO:0003824]	0.99117	-0.31697	VFKEVLDKK	0	0	0	0	0	0	0	0	0	0	0	0	0	0	0	0	0	0	0	0	0	0	0	0	0	0	0	0	0	0	0	0	0	0	0	0	0	0	0	0
A0A669DSP6	Talin 2a		Oreochromis niloticus (Nile tilapia) (Tilapia nilotica)	cell adhesion [GO:0007155]	cytoplasm [GO:0005737]; cytoskeleton [GO:0005856]; focal adhesion [GO:0005925]; ruffle [GO:0001726]	actin filament binding [GO:0051015]; structural constituent of cytoskeleton [GO:0005200]	1.0014	-2.3821	ALGELISATK	0	0	0	0	0	0	0	0	0	0	0	0	0	0	0	0	0	0	0	0	0	0	0	0	0	0	0	0	0	0	0	0	0	0	0	0	0	0	0	0
A0A669DSR5	Zgc:163098		Oreochromis niloticus (Nile tilapia) (Tilapia nilotica)	RNA processing [GO:0006396]		RNA binding [GO:0003723]	0.999	-1.0518	ATITRSY	0	0	0	0	0	0	0	0	0	0	0	0	0	0	0	0	0	0	0	0	0	0	0	0	0	0	0	0	0	0	0	0	0	0	0	0	0	0	0	0
A0A669DSR8	Diacylglycerol kinase (DAG kinase) (EC 2.7.1.107)		Oreochromis niloticus (Nile tilapia) (Tilapia nilotica)	cell development [GO:0048468]; glycerolipid metabolic process [GO:0046486]; protein kinase C-activating G protein-coupled receptor signaling pathway [GO:0007205]		ATP binding [GO:0005524]; calcium ion binding [GO:0005509]; diacylglycerol kinase activity [GO:0004143]	0.99861	-1.0301	NRLLFLIYR	0	931.21	0	1040.6	0	0	0	0	0	0	0	0	737.62	0	0	0	0	0	0	0	0	489.52	0	0	0	0	0	0	639.02	0	754.43	744.4	763.7	0	0	0	0	0	0	0
A0A669DT35	Eukaryotic translation initiation factor 3 subunit C (eIF3c) (Eukaryotic translation initiation factor 3 subunit 8)	EIF3C EIF3S8	Oreochromis niloticus (Nile tilapia) (Tilapia nilotica)	formation of cytoplasmic translation initiation complex [GO:0001732]	eukaryotic 43S preinitiation complex [GO:0016282]; eukaryotic 48S preinitiation complex [GO:0033290]; eukaryotic translation initiation factor 3 complex [GO:0005852]	RNA binding [GO:0003723]; translation initiation factor activity [GO:0003743]; translation initiation factor binding [GO:0031369]	1.0043	-0.87926	LGNLVENNER	0	4626.6	0	2962.5	0	0	0	0	0	2945.6	2921.6	0	0	0	1558.7	0	0	0	0	0	4015.3	0	0	0	0	0	0	7792.8	7942.6	7883.3	0	0	2035.3	1046	0	0	0	0	0	0
A0A669DTX8	Protein kinase domain-containing protein		Oreochromis niloticus (Nile tilapia) (Tilapia nilotica)	protein phosphorylation [GO:0006468]		ATP binding [GO:0005524]; protein kinase activity [GO:0004672]	1.0036	-1.4662	LTHLAWMR	0	0	0	0	0	0	0	0	0	416.1	466.32	0	445.15	0	410.62	0	0	0	0	0	510.55	0	0	0	0	0	0	570.28	600.1	582.9	547.79	0	575.37	0	0	0	0	531.64	0	0
A0A669DTY6	carnitine O-palmitoyltransferase (EC 2.3.1.21)		Oreochromis niloticus (Nile tilapia) (Tilapia nilotica)	fatty acid beta-oxidation [GO:0006635]	mitochondrial outer membrane [GO:0005741]	carnitine O-palmitoyltransferase activity [GO:0004095]	0.98176	-0.39719	KLERGELAPLR	0	0	0	0	0	0	0	988.02	0	0	0	0	0	0	0	0	0	0	0	0	0	0	0	0	0	0	0	0	0	0	0	0	0	0	0	0	0	0	0	0
A0A669DUC2	NACHT, LRR and PYD domains-containing protein 1b allele 3-like	LOC102082520	Oreochromis niloticus (Nile tilapia) (Tilapia nilotica)	regulation of apoptotic process [GO:0042981]	cytoplasm [GO:0005737]		0.98837	-0.11515	NVVIHHVLRTRK	0	0	0	0	0	0	0	0	0	0	0	0	0	0	0	0	0	0	0	0	0	0	0	0	0	0	0	0	0	0	0	0	0	0	0	0	0	0	0	0
A0A669DUC8	Carnitine O-acetyltransferase	LOC100707255	Oreochromis niloticus (Nile tilapia) (Tilapia nilotica)			acyltransferase activity [GO:0016746]	1.0132	-1.1741	VSNELYR	0	0	0	0	0	0	0	0	0	2611.3	0	0	0	0	0	0	0	0	0	0	0	0	0	0	0	1876.9	0	0	0	0	0	0	0	0	0	0	0	0	0	0
A0A669DUJ1	TTF-type domain-containing protein		Oreochromis niloticus (Nile tilapia) (Tilapia nilotica)			protein dimerization activity [GO:0046983]	0.9963	-5.9795	QGQAFRGHDESESTDNRGNFR	0	0	0	0	0	0	0	0	0	0	0	0	0	0	0	0	0	657.01	0	0	0	0	0	0	0	0	0	0	0	0	0	0	0	0	0	0	0	0	0	0
A0A669DUN2	Ubiquitin-associated protein 2	LOC100696291	Oreochromis niloticus (Nile tilapia) (Tilapia nilotica)		cytoplasm [GO:0005737]	DNA binding [GO:0003677]	1.0117	-0.20505	VAGVRGRGR	0	0	0	0	0	0	0	0	0	0	0	0	0	0	0	0	0	0	0	0	0	0	0	0	0	0	0	0	0	0	0	0	0	0	0	0	0	0	0	0
A0A669DUQ5	Pleckstrin homology domain containing, family H (with MyTH4 domain) member 2		Oreochromis niloticus (Nile tilapia) (Tilapia nilotica)		cytoskeleton [GO:0005856]		1	-1.9324	ISATSSIAR	0	0	0	0	0	0	0	0	0	0	0	0	0	0	0	0	0	0	0	0	0	0	0	0	0	0	0	0	0	0	0	0	0	0	0	0	0	0	0	0
A0A669DUW2	CENP-T/Histone H4 histone fold domain-containing protein		Oreochromis niloticus (Nile tilapia) (Tilapia nilotica)		nucleosome [GO:0000786]; nucleus [GO:0005634]	DNA binding [GO:0003677]; protein heterodimerization activity [GO:0046982]; structural constituent of chromatin [GO:0030527]	0	5.8035	ISGLIYEETR	0	0	0	0	0	0	0	0	0	0	0	0	0	0	0	0	0	0	0	0	0	1465.9	1517.4	861.06	0	0	0	0	0	0	0	0	0	0	0	0	0	0	0	0
A0A669DV11	MDM4 regulator of p53	mdm4	Oreochromis niloticus (Nile tilapia) (Tilapia nilotica)	negative regulation of apoptotic process [GO:0043066]; regulation of cell cycle [GO:0051726]	nucleus [GO:0005634]	metal ion binding [GO:0046872]	0.99609	-4.4575	EVMHYLGQYIMGK	0	0	0	0	0	0	0	0	0	0	0	0	0	0	0	0	0	0	0	0	0	0	0	0	0	0	0	0	0	0	0	0	0	0	0	0	0	0	0	0
A0A669DV31	Basic, immunoglobulin-like variable motif containing		Oreochromis niloticus (Nile tilapia) (Tilapia nilotica)				0.98292	-0.63073	ASKKGNGK	0	0	0	0	0	0	0	0	0	0	0	0	0	0	0	0	0	0	0	0	0	0	0	0	0	0	0	0	0	0	0	0	0	0	0	0	0	0	0	0
A0A669DV95	60S ribosomal protein L34		Oreochromis niloticus (Nile tilapia) (Tilapia nilotica)	translation [GO:0006412]	ribonucleoprotein complex [GO:1990904]; ribosome [GO:0005840]	structural constituent of ribosome [GO:0003735]	0.99629	-0.8319	IVVKVLKAQAQSQK	0	0	0	0	0	0	0	0	0	0	0	0	0	931.55	0	0	0	0	0	0	0	0	0	0	0	0	0	0	0	0	0	0	0	0	0	0	0	0	0	0
A0A669DVJ8	Uncharacterized LOC102076966	LOC102076966	Oreochromis niloticus (Nile tilapia) (Tilapia nilotica)	protein phosphorylation [GO:0006468]	membrane [GO:0016020]	ATP binding [GO:0005524]; protein kinase activity [GO:0004672]	1.0017	-1.4662	EDLSVKPR	0	0	0	0	0	0	0	0	0	0	0	0	0	0	0	0	0	0	0	0	0	0	0	0	0	0	0	0	0	0	0	0	986.67	0	0	0	0	0	0	0
A0A669DVK1	Vitronectin	LOC100692624	Oreochromis niloticus (Nile tilapia) (Tilapia nilotica)				1.0019	-1.0796	INCQGKSYIFK	0	0	0	0	0	0	0	0	0	0	0	0	0	0	0	0	0	0	0	0	978.86	0	0	0	0	0	0	0	1993.4	0	0	0	0	0	0	0	0	0	0	0
A0A669DVX7	Chemokine interleukin-8-like domain-containing protein		Oreochromis niloticus (Nile tilapia) (Tilapia nilotica)				1.0017	-1.4662	IVYSQFFK	0	0	0	0	0	0	0	0	0	0	0	0	0	0	0	0	0	0	0	0	0	0	0	0	0	0	0	0	0	0	0	0	0	0	0	0	0	0	0	0
A0A669DW65	Alpha-2-macroglobulin bait region domain-containing protein		Oreochromis niloticus (Nile tilapia) (Tilapia nilotica)	negative regulation of peptidase activity [GO:0010466]	extracellular space [GO:0005615]	serine-type endopeptidase inhibitor activity [GO:0004867]	0.99844	-1.7637	SVLIKEPGNILDVDK	892.37	1007	918.91	818.95	0	1049.8	0	1136.9	1051.4	0	0	1147.9	820.48	988.67	0	904.82	958.39	851.17	0	988.71	886.42	948.71	928.9	873.16	0	893.84	844.99	1081	970.87	1150.1	808.62	940	0	1097.3	1002.9	0	0	942.71	840.27	1017.3
A0A669DW90	Polycomb protein suz12-B	LOC100701898	Oreochromis niloticus (Nile tilapia) (Tilapia nilotica)		nucleus [GO:0005634]	metal ion binding [GO:0046872]	0.99296	-0.63073	NSRNNVKR	0	0	0	0	0	0	0	0	0	0	0	0	0	0	0	0	0	0	0	0	0	0	0	0	0	0	0	0	0	0	0	0	0	0	0	0	0	0	0	0
A0A669DWB4	PWWP domain-containing protein		Oreochromis niloticus (Nile tilapia) (Tilapia nilotica)		nucleus [GO:0005634]		1.0004	-1.887	LKEKEAQK	0	0	0	0	0	0	0	0	0	0	0	0	0	0	0	0	0	0	0	0	0	0	0	0	0	0	0	0	0	0	0	0	0	0	0	0	0	0	0	0
A0A669DWB8	non-specific serine/threonine protein kinase (EC 2.7.11.1)	MARK1	Oreochromis niloticus (Nile tilapia) (Tilapia nilotica)	protein phosphorylation [GO:0006468]	cytoplasm [GO:0005737]; dendrite [GO:0030425]	ATP binding [GO:0005524]; protein serine/threonine kinase activity [GO:0004674]	0	0.32139	IIDKTQLNPTSLQKVSLLK	0	0	0	0	0	0	0	0	0	2850.8	1750.1	0	0	0	0	0	0	0	0	0	0	0	0	2538.7	0	0	0	0	0	0	0	0	0	0	0	0	0	0	0	0
A0A669DWI0	F-actin monooxygenase (EC 1.14.13.225)	mical2	Oreochromis niloticus (Nile tilapia) (Tilapia nilotica)	animal organ development [GO:0048513]	cytoplasm [GO:0005737]	actin binding [GO:0003779]; FAD binding [GO:0071949]; metal ion binding [GO:0046872]; monooxygenase activity [GO:0004497]	1.0117	-1.1741	KPFHPPK	0	0	0	0	0	0	0	0	0	0	0	0	0	0	0	0	0	0	0	0	0	0	0	0	0	0	0	0	0	0	0	0	0	0	0	0	0	0	0	0
A0A669DWS6	non-specific serine/threonine protein kinase (EC 2.7.11.1)		Oreochromis niloticus (Nile tilapia) (Tilapia nilotica)	protein phosphorylation [GO:0006468]; proteolysis [GO:0006508]		ATP binding [GO:0005524]; magnesium ion binding [GO:0000287]; protein serine/threonine kinase activity [GO:0004674]	0.98886	-0.1176	RESLGSVTLR	0	0	0	0	0	0	0	0	0	0	0	0	0	0	0	0	0	0	0	0	0	0	0	0	0	0	0	0	0	0	0	0	0	0	0	0	0	0	0	0
A0A669DWS8	Transcription initiation factor TFIID subunit 4	LOC109202667	Oreochromis niloticus (Nile tilapia) (Tilapia nilotica)	DNA-templated transcription initiation [GO:0006352]; transcription by RNA polymerase II [GO:0006366]	transcription factor TFIID complex [GO:0005669]	protein heterodimerization activity [GO:0046982]	0.99333	-0.33863	RITTPRR	0	0	0	0	0	0	0	0	0	0	0	0	0	0	0	0	0	0	0	0	0	0	0	0	0	0	0	0	0	0	0	0	0	0	0	0	0	0	0	0
A0A669DWT6	Kinesin-like protein	LOC100691451	Oreochromis niloticus (Nile tilapia) (Tilapia nilotica)	microtubule-based movement [GO:0007018]; system development [GO:0048731]	microtubule [GO:0005874]	ATP binding [GO:0005524]; microtubule binding [GO:0008017]; microtubule motor activity [GO:0003777]	0.99666	-4.158	SERLEELSFLHERHEQTK	0	0	0	0	0	0	0	0	0	0	0	0	0	0	0	0	0	0	0	0	0	0	0	0	0	0	0	0	0	0	0	0	0	0	0	0	0	0	0	0
A0A669DWU8	Solute carrier family 39 member 1		Oreochromis niloticus (Nile tilapia) (Tilapia nilotica)		membrane [GO:0016020]	metal ion transmembrane transporter activity [GO:0046873]	0.98722	-0.56364	EVKVSILFVLKHK	0	0	0	0	0	0	0	0	0	0	0	0	815.34	0	0	979.88	0	0	0	0	0	0	0	0	873.91	0	0	0	0	0	0	0	0	0	0	0	0	0	967.19	0
A0A669DWW8	SLC12A transporter C-terminal domain-containing protein		Oreochromis niloticus (Nile tilapia) (Tilapia nilotica)		membrane [GO:0016020]	chloride:monoatomic cation symporter activity [GO:0015377]	1	-0.0047515	EIIPSLMMEQR	0	0	0	0	0	0	0	0	0	0	0	0	0	0	0	0	0	0	0	0	0	0	1021.3	1080.9	0	0	0	0	0	0	0	0	0	0	0	0	0	0	0	0
A0A669DWY1	Cyclin dependent kinase 19	cdk19	Oreochromis niloticus (Nile tilapia) (Tilapia nilotica)	protein phosphorylation [GO:0006468]	cytoplasm [GO:0005737]	ATP binding [GO:0005524]; protein serine/threonine kinase activity [GO:0004674]	1.0118	-1.3439	HKVKPDSK	0	0	0	0	0	0	0	0	0	0	0	0	0	0	0	0	0	0	0	0	0	0	0	0	0	0	0	0	0	0	0	0	0	0	0	0	0	0	0	0
A0A669DXA0	NOP56 ribonucleoprotein	nop56	Oreochromis niloticus (Nile tilapia) (Tilapia nilotica)	ribosome biogenesis [GO:0042254]	box C/D RNP complex [GO:0031428]; nucleolus [GO:0005730]; small-subunit processome [GO:0032040]	snoRNA binding [GO:0030515]	0.98601	-0.3656	AKVKFNVNR	0	0	0	0	0	0	0	0	0	0	0	0	0	0	0	0	0	0	0	0	0	0	0	0	0	0	0	0	0	0	0	0	0	0	0	0	0	0	0	0
A0A669DXB2	AP-3 complex subunit beta	ap3b1	Oreochromis niloticus (Nile tilapia) (Tilapia nilotica)	intracellular protein transport [GO:0006886]; vesicle-mediated transport [GO:0016192]	AP-3 adaptor complex [GO:0030123]; clathrin adaptor complex [GO:0030131]; clathrin-coated vesicle membrane [GO:0030665]		1.0008	-0.84465	SVMASMLLR	0	0	0	0	0	0	0	0	0	0	0	0	0	0	0	0	0	0	0	0	0	0	0	718.3	0	0	0	0	0	0	0	0	0	0	0	0	0	0	0	0
A0A669DXJ4	SH2 domain-containing adapter protein F	SHF	Oreochromis niloticus (Nile tilapia) (Tilapia nilotica)				1.004	-0.97329	ISKAFAVEIK	0	0	0	0	0	0	0	0	0	0	0	0	0	0	0	0	0	0	0	0	0	0	0	0	0	0	0	0	0	0	0	0	0	0	0	0	0	0	0	0
A0A669DXM3	Zinc finger protein 366		Oreochromis niloticus (Nile tilapia) (Tilapia nilotica)				1.0019	-1.4662	QGSPGEPR	0	0	0	0	0	0	0	0	0	0	0	0	0	0	0	0	0	0	0	0	0	0	0	0	0	0	0	0	0	0	0	0	0	0	0	0	0	0	0	0
A0A669DY00	polyribonucleotide nucleotidyltransferase (EC 2.7.7.8) (Polynucleotide phosphorylase 1)	PNPT1	Oreochromis niloticus (Nile tilapia) (Tilapia nilotica)	mRNA catabolic process [GO:0006402]; RNA processing [GO:0006396]	cytoplasm [GO:0005737]	polyribonucleotide nucleotidyltransferase activity [GO:0004654]; RNA binding [GO:0003723]	1.01	-1.141	ISRDEAINK	65436	0	0	0	0	0	103410	0	0	60352	0	60007	54868	0	53240	0	0	56916	0	77671	0	0	72268	81467	45462	0	53697	0	73916	68608	0	0	0	0	53279	61105	0	63964	70284	64662
A0A669DY36	Protein-serine/threonine kinase (EC 2.7.11.-)		Oreochromis niloticus (Nile tilapia) (Tilapia nilotica)	phosphorylation [GO:0016310]	mitochondrial matrix [GO:0005759]	ATP binding [GO:0005524]; protein kinase activity [GO:0004672]	0.98052	-0.45103	RVPFVYLFIK	0	0	0	0	787.02	0	1013.7	0	0	0	0	527.51	0	0	479.22	554.79	0	0	0	0	0	0	0	0	0	0	0	562.4	0	0	0	0	0	0	0	0	0	0	0	0
A0A669DY42	Tetratricopeptide repeat domain 37	ttc37	Oreochromis niloticus (Nile tilapia) (Tilapia nilotica)	RNA catabolic process [GO:0006401]	Ski complex [GO:0055087]		0.98488	-0.3732	DRSKAHTHLLK	0	0	0	0	0	0	0	0	0	0	0	0	0	0	0	0	0	0	0	0	0	0	0	0	0	0	0	0	0	0	0	0	0	0	0	0	0	0	0	0
A0A669DYD8	VPS9 domain containing 1	vps9d1	Oreochromis niloticus (Nile tilapia) (Tilapia nilotica)	vesicle-mediated transport [GO:0016192]		guanyl-nucleotide exchange factor activity [GO:0005085]	1.0007	-1.8869	AVKEHLK	0	0	0	0	0	0	38923	0	0	0	0	0	0	0	0	0	0	0	0	0	0	0	0	0	0	0	0	0	0	0	0	0	0	0	0	0	0	0	0	0
A0A669DYE4	Uncharacterized protein		Oreochromis niloticus (Nile tilapia) (Tilapia nilotica)				1.001	-2.3976	DPKNANEK	0	0	0	0	0	0	0	4032.4	0	0	0	0	0	0	0	0	0	0	0	0	0	0	0	0	0	0	0	0	0	0	0	0	0	0	0	0	0	0	0	0
A0A669DYE9	Elongation factor for RNA polymerase II 2	ell2	Oreochromis niloticus (Nile tilapia) (Tilapia nilotica)	transcription elongation by RNA polymerase II [GO:0006368]	transcription elongation factor complex [GO:0008023]		0.98579	-0.76167	KLEVLAR	0	0	0	0	0	0	0	0	0	0	0	0	0	0	0	0	0	0	0	0	0	0	0	0	0	0	0	0	0	0	0	0	0	0	0	394.29	0	0	0	0
A0A669DYP3	Parkin coregulated	pacrg	Oreochromis niloticus (Nile tilapia) (Tilapia nilotica)				1.0024	-1.4662	EELPIAVK	0	0	0	0	0	0	0	0	0	0	0	0	0	0	0	0	0	0	0	0	0	0	0	0	0	0	0	0	0	0	0	0	0	0	0	0	0	0	0	0
A0A669DYS5	Sodium-coupled neutral amino acid transporter 3	LOC100696164	Oreochromis niloticus (Nile tilapia) (Tilapia nilotica)		membrane [GO:0016020]		0.99639	-2.9194	TQAIIYR	0	0	0	0	0	0	0	0	0	0	0	0	0	0	0	0	0	0	0	0	0	0	0	0	0	0	0	0	0	0	0	0	0	0	0	0	0	0	0	0
A0A669DYY7	Reprimo-like		Oreochromis niloticus (Nile tilapia) (Tilapia nilotica)		membrane [GO:0016020]		0.95601	-0.021625	SESMINFLVRDR	0	0	0	0	0	0	0	0	0	0	0	0	0	0	0	0	0	0	0	0	0	623.04	653.54	0	0	0	0	0	0	0	0	0	0	0	0	0	0	0	0	0
A0A669DZ02	Pecanex-like protein	pcnx2	Oreochromis niloticus (Nile tilapia) (Tilapia nilotica)		membrane [GO:0016020]		0.97414	-0.17087	IYYKLKLFPGK	0	0	0	0	0	0	0	0	0	0	0	0	0	0	0	0	0	0	0	0	0	0	0	0	0	0	0	0	0	0	0	0	0	0	0	0	0	0	0	0
A0A669DZ04	RB transcriptional corepressor like 1	rbl1	Oreochromis niloticus (Nile tilapia) (Tilapia nilotica)	cell cycle [GO:0007049]; chromatin organization [GO:0006325]; regulation of cell cycle [GO:0051726]; regulation of transcription by RNA polymerase II [GO:0006357]	nucleus [GO:0005634]		0	0.25163	ILENVMVQETKR	642.88	569.82	0	0	0	0	1524.8	1634.3	1306	0	0	0	0	0	0	0	0	0	0	608.94	0	946.75	886.71	764.78	0	0	0	0	1923.5	1739.2	570.47	583.76	0	0	0	0	0	0	612.05	0
A0A669DZ87	U1-type domain-containing protein		Oreochromis niloticus (Nile tilapia) (Tilapia nilotica)			nucleic acid binding [GO:0003676]; zinc ion binding [GO:0008270]	0.98431	-0.37436	EYLMKELERLR	0	0	0	0	0	0	1737.7	0	0	0	0	0	0	0	0	0	0	0	0	0	0	0	0	0	0	0	0	0	0	0	0	0	0	0	0	0	0	0	0	0
A0A669DZA5	Chloride intracellular channel protein 6	LOC100712295	Oreochromis niloticus (Nile tilapia) (Tilapia nilotica)		chloride channel complex [GO:0034707]	chloride channel activity [GO:0005254]	1.0026	-1.0763	ELKSVIKDESLPK	0	0	0	0	0	0	0	0	0	0	0	0	0	0	0	0	0	0	0	0	0	0	0	0	0	0	0	0	0	0	0	0	0	0	0	0	0	0	0	0
A0A669DZA7	Ig-like domain-containing protein		Oreochromis niloticus (Nile tilapia) (Tilapia nilotica)				1.0029	-2.0907	ALEWVANIR	0	0	0	0	0	0	0	0	0	0	0	0	0	0	0	0	0	0	0	0	0	0	0	0	0	0	0	0	0	0	0	0	0	0	0	0	0	0	0	0
A0A669DZB3	Chloride intracellular channel protein	LOC100694858	Oreochromis niloticus (Nile tilapia) (Tilapia nilotica)	negative regulation of ryanodine-sensitive calcium-release channel activity [GO:0060315]	chloride channel complex [GO:0034707]; cytoplasm [GO:0005737]	chloride channel activity [GO:0005254]; voltage-gated monoatomic ion channel activity [GO:0005244]	1.0118	-1.1524	FTVTTVDMR	0	0	0	0	0	0	0	0	0	0	0	0	0	0	0	0	0	0	0	0	0	0	0	0	0	0	0	0	0	0	0	0	0	0	0	0	0	0	0	0
A0A669DZG3	WD repeat domain 7	WDR7	Oreochromis niloticus (Nile tilapia) (Tilapia nilotica)				1.0012	-1.4662	LPAHSTIR	0	0	0	0	0	0	0	0	0	0	0	0	0	0	0	0	0	0	0	0	0	0	0	0	0	691.01	0	0	0	0	0	0	0	0	0	0	0	0	0	0
A0A669DZI3	Histone H3		Oreochromis niloticus (Nile tilapia) (Tilapia nilotica)		nucleosome [GO:0000786]; nucleus [GO:0005634]	DNA binding [GO:0003677]; protein heterodimerization activity [GO:0046982]; structural constituent of chromatin [GO:0030527]	0.9993	-1.002	STELLIR	0	0	0	0	0	0	0	0	0	0	0	0	0	0	0	0	0	0	0	0	0	807.11	787.42	893.66	0	0	0	0	0	0	0	0	0	0	0	0	0	0	0	0
A0A669DZL8	Interleukin 18 receptor 1		Oreochromis niloticus (Nile tilapia) (Tilapia nilotica)		membrane [GO:0016020]	hydrolase activity [GO:0016787]; interleukin-1 receptor activity [GO:0004908]	0.97972	-0.099711	EEIIKTTSLIFR	0	0	0	0	0	0	0	0	0	0	0	0	0	0	0	0	0	0	0	0	414.08	0	0	0	0	0	0	0	0	0	0	0	0	0	0	0	0	0	0	0
A0A669DZR0	protein kinase C (EC 2.7.11.13)		Oreochromis niloticus (Nile tilapia) (Tilapia nilotica)	protein phosphorylation [GO:0006468]; signal transduction [GO:0007165]	cytoplasm [GO:0005737]	ATP binding [GO:0005524]; calcium-dependent protein kinase C activity [GO:0004698]	0.98575	-0.47233	DWRALSGVKFLR	0	0	691.48	0	0	0	0	0	0	0	0	0	409.62	0	0	0	0	0	0	0	0	0	0	0	0	0	0	0	0	0	0	0	0	0	0	0	0	0	0	912.99
A0A669DZW5	6-phosphofructokinase (EC 2.7.1.11) (Phosphohexokinase)		Oreochromis niloticus (Nile tilapia) (Tilapia nilotica)	fructose 6-phosphate metabolic process [GO:0006002]	cytoplasm [GO:0005737]	6-phosphofructokinase activity [GO:0003872]; ATP binding [GO:0005524]; metal ion binding [GO:0046872]	1.0189	0.031924	RTLVFQPVVQLK	0	0	982.06	0	0	0	0	756.74	843.56	0	0	0	0	564.51	0	0	0	0	2500.7	0	0	0	0	0	804.33	0	0	0	0	0	470.22	0	0	0	0	0	585.8	0	0	0
A0A669DZZ7	Heat shock protein 4a		Oreochromis niloticus (Nile tilapia) (Tilapia nilotica)			ATP binding [GO:0005524]; ATP-dependent protein folding chaperone [GO:0140662]	0.98025	-0.4022	IIEAYKAK	0	0	0	0	0	0	0	0	0	0	0	0	0	0	0	0	0	0	0	0	0	0	0	0	0	0	0	0	0	0	0	0	0	0	0	0	0	0	0	0
A0A669E009	C-C motif chemokine	LOC100700696	Oreochromis niloticus (Nile tilapia) (Tilapia nilotica)	immune response [GO:0006955]	extracellular space [GO:0005615]	chemokine activity [GO:0008009]	1.0014	-1.4662	WVIDAIDR	0	0	0	0	0	0	0	0	0	0	0	0	0	0	0	0	0	0	0	0	0	0	0	0	0	0	0	0	0	0	0	0	0	780.66	0	0	0	0	0	0
A0A669E015	Cms1 ribosomal small subunit homolog	cmss1	Oreochromis niloticus (Nile tilapia) (Tilapia nilotica)				0.99445	-0.63073	TKTKPEKR	0	0	0	0	0	0	0	0	0	0	0	0	0	0	0	0	0	0	0	0	0	0	0	0	0	0	0	0	0	0	0	0	0	0	0	0	0	0	0	0
A0A669E048	ribonuclease H (EC 3.1.26.4)	LOC102082561	Oreochromis niloticus (Nile tilapia) (Tilapia nilotica)	DNA integration [GO:0015074]; proteolysis [GO:0006508]		aspartic-type endopeptidase activity [GO:0004190]; nucleic acid binding [GO:0003676]; RNA-directed DNA polymerase activity [GO:0003964]	0.99868	-1.0538	EYGLKLSPEK	0	0	0	0	0	0	0	0	0	0	0	0	0	0	0	0	0	0	0	0	0	0	0	0	0	0	0	0	0	0	0	0	0	0	0	0	0	0	0	0
A0A669E063	Solute carrier family 13 member 5b		Oreochromis niloticus (Nile tilapia) (Tilapia nilotica)		membrane [GO:0016020]	solute:sodium symporter activity [GO:0015370]	1.01	-1.1741	SAFHGAK	0	0	0	0	0	0	0	0	0	0	0	0	0	0	0	0	0	0	0	0	0	0	0	0	0	0	0	0	0	0	0	0	0	0	0	0	0	0	0	1655.2
A0A669E066	ARVCF delta catenin family member	arvcf	Oreochromis niloticus (Nile tilapia) (Tilapia nilotica)	cell-cell adhesion [GO:0098609]			0.9883	-0.35187	DAEWTTVFK	0	0	0	0	0	0	667.82	556.29	613.45	0	0	0	0	0	0	0	0	0	0	262.32	0	1000.2	1020.2	989.02	0	0	0	439.06	431.09	392.18	0	0	0	0	0	0	0	0	0	0
A0A669E097	Poly [ADP-ribose] polymerase (EC 2.4.2.30)	parp1	Oreochromis niloticus (Nile tilapia) (Tilapia nilotica)	DNA repair [GO:0006281]; innate immune response [GO:0045087]	chromosome [GO:0005694]; nucleus [GO:0005634]	DNA binding [GO:0003677]; NAD binding [GO:0051287]; NAD+ ADP-ribosyltransferase activity [GO:0003950]; nucleotidyltransferase activity [GO:0016779]; zinc ion binding [GO:0008270]	0.99735	-2.5931	AIESGGAAGGKGDQK	0	0	0	0	0	0	0	0	0	0	0	0	0	0	0	0	0	0	0	0	0	0	0	0	0	0	0	0	0	0	0	0	0	0	0	0	0	0	0	0
A0A669E0E8	Fas associated factor family member 2	faf2	Oreochromis niloticus (Nile tilapia) (Tilapia nilotica)				1.004	-1.3488	QGDLTGLESMDQCR	0	0	0	0	6531	0	14083	0	0	5137.1	0	0	0	2329.2	0	0	5007.9	0	0	0	0	0	0	0	0	0	0	0	0	8941.4	6073.9	5311.7	0	0	0	0	0	0	0	4617.5
A0A669E0M2	malate synthase (EC 2.3.3.9)	LOC100711605	Oreochromis niloticus (Nile tilapia) (Tilapia nilotica)	glyoxylate cycle [GO:0006097]; tricarboxylic acid cycle [GO:0006099]		malate synthase activity [GO:0004474]	1.0111	-0.19908	ELIMDLSPHLAQCSNIR	0	0	0	566.4	0	0	0	0	0	0	0	0	0	0	0	0	0	0	0	0	0	0	0	0	0	0	0	0	0	0	0	0	0	0	0	0	0	0	0	0
A0A669E0N5	Glomulin	LOC100709774	Oreochromis niloticus (Nile tilapia) (Tilapia nilotica)				0.993	-0.31697	AKEARDAAR	0	0	0	0	0	0	0	0	0	0	0	0	0	0	0	0	0	0	0	0	0	0	0	0	0	0	0	0	0	0	0	591.51	0	0	0	0	0	0	0	0
A0A669E0R8	Ras-related C3 botulinum toxin substrate 1-like	RAC1	Oreochromis niloticus (Nile tilapia) (Tilapia nilotica)	small GTPase mediated signal transduction [GO:0007264]		GTP binding [GO:0005525]; GTPase activity [GO:0003924]	0.99409	-0.82023	IALSPPPITKK	0	0	0	0	0	0	0	0	0	12058	0	0	0	0	0	0	0	0	0	0	0	0	0	0	0	0	0	0	0	0	0	0	0	0	0	0	0	0	0	0
A0A669E0Z6	MCF.2 cell line derived transforming sequence a		Oreochromis niloticus (Nile tilapia) (Tilapia nilotica)	intracellular signal transduction [GO:0035556]		guanyl-nucleotide exchange factor activity [GO:0005085]	0.99708	-6.0157	LHQYLQLLR	0	0	717.73	0	0	736.15	0	0	0	0	0	0	0	0	0	0	0	0	981.39	0	0	0	720.21	0	0	0	0	1045.4	0	0	0	0	0	711.4	0	0	0	0	0	649.1
A0A669E139	C-X-C motif chemokine 10	LOC102077089	Oreochromis niloticus (Nile tilapia) (Tilapia nilotica)	defense response [GO:0006952]; immune response [GO:0006955]	extracellular space [GO:0005615]	chemokine activity [GO:0008009]	0.9882	-0.11515	WFPNLLKTLQKK	0	0	0	0	0	0	0	0	0	0	0	0	0	0	0	0	0	0	0	0	0	0	0	0	0	0	0	0	0	0	0	0	0	0	0	0	424.1	0	0	0
A0A669E157	Tyrosine-protein kinase receptor (EC 2.7.10.1)	LOC100711993	Oreochromis niloticus (Nile tilapia) (Tilapia nilotica)	protein autophosphorylation [GO:0046777]; transmembrane receptor protein tyrosine kinase signaling pathway [GO:0007169]	plasma membrane [GO:0005886]	ATP binding [GO:0005524]; insulin receptor substrate binding [GO:0043560]; phosphatidylinositol 3-kinase binding [GO:0043548]; transmembrane receptor protein tyrosine kinase activity [GO:0004714]	0.99715	-2.5998	CVSRQDYR	0	0	0	0	0	0	0	0	0	0	0	0	0	0	0	0	0	0	0	0	0	0	0	0	0	0	0	0	0	0	0	0	0	0	0	0	0	0	0	0
A0A669E158	Unconventional myosin-If	LOC100696178	Oreochromis niloticus (Nile tilapia) (Tilapia nilotica)	system development [GO:0048731]	myosin complex [GO:0016459]	actin binding [GO:0003779]; ATP binding [GO:0005524]; cytoskeletal motor activity [GO:0003774]	0.99475	-2.8043	LTISFGDR	0	0	0	0	0	0	0	0	0	0	0	849.05	0	0	0	0	0	0	0	0	0	0	0	0	0	0	0	0	0	0	0	0	0	0	0	0	0	0	0	0
A0A669E183	Vacuolar protein sorting-associated protein 37B	LOC102080564	Oreochromis niloticus (Nile tilapia) (Tilapia nilotica)	catabolic process [GO:0009056]; protein transport [GO:0015031]	ESCRT I complex [GO:0000813]; late endosome membrane [GO:0031902]		1.0017	-1.4662	VNLTQKPK	0	0	0	0	0	0	0	0	0	0	0	0	0	0	0	0	0	0	0	0	0	956.27	0	0	0	0	0	0	0	0	0	0	0	0	0	0	0	0	0	0
A0A669E1A3	RING-type E3 ubiquitin transferase (EC 2.3.2.27)	ttc3	Oreochromis niloticus (Nile tilapia) (Tilapia nilotica)	protein ubiquitination [GO:0016567]	cytoplasm [GO:0005737]	metal ion binding [GO:0046872]	1.0096	-1.1741	SQGDINK	0	0	0	0	0	1753.9	1912.1	0	2204.1	0	0	1724.8	0	1327.8	1298.3	0	0	0	0	0	0	0	0	0	0	0	0	0	0	0	1371.8	0	0	0	0	0	0	0	0	0
A0A669E1B6	Protein kinase cAMP-dependent type I regulatory subunit beta	prkar1b	Oreochromis niloticus (Nile tilapia) (Tilapia nilotica)	regulation of protein phosphorylation [GO:0001932]	cAMP-dependent protein kinase complex [GO:0005952]; cytoplasm [GO:0005737]; plasma membrane [GO:0005886]	cAMP binding [GO:0030552]; cAMP-dependent protein kinase regulator activity [GO:0008603]	1.0054	-0.2797	FLREHFEKLEK	0	0	0	0	0	0	0	0	0	0	0	0	0	0	0	0	0	0	0	0	0	0	0	0	0	0	0	0	0	0	0	0	0	0	0	0	0	0	0	0
A0A669E1B9	HEAT repeat containing 5A	heatr5a	Oreochromis niloticus (Nile tilapia) (Tilapia nilotica)				1.0032	-1.3992	SLITTSPHLKSRLQAAIK	90468	0	0	0	0	0	0	0	0	0	0	0	0	0	0	0	0	0	0	0	0	0	0	0	0	0	0	0	0	0	0	0	0	0	0	0	0	0	0	0
A0A669E1D4	Complement C4	LOC100704190	Oreochromis niloticus (Nile tilapia) (Tilapia nilotica)		extracellular space [GO:0005615]	endopeptidase inhibitor activity [GO:0004866]	1.0034	-1.3636	IPMERTCRER	0	0	0	0	0	0	0	0	0	0	0	0	0	0	0	0	0	0	0	0	0	0	0	0	0	0	0	0	0	0	0	0	0	0	0	0	0	0	0	0
A0A669E1I2	Suppressor of cytokine signaling 7	socs7	Oreochromis niloticus (Nile tilapia) (Tilapia nilotica)	intracellular signal transduction [GO:0035556]; negative regulation of signal transduction [GO:0009968]; protein ubiquitination [GO:0016567]			1.0022	-1.4601	EFLLNRKR	0	0	0	0	0	0	0	0	0	0	0	0	0	0	0	0	0	0	0	0	0	0	0	0	0	0	0	0	0	0	0	0	0	0	0	0	0	0	0	0
A0A669E1K0	KAT8 regulatory NSL complex subunit 2 (NSL complex protein NSL2) (Non-specific lethal 2 homolog)	kansl2	Oreochromis niloticus (Nile tilapia) (Tilapia nilotica)		histone acetyltransferase complex [GO:0000123]; nucleus [GO:0005634]		1.0044	-1.106	LEGLDFCIK	0	0	0	0	0	0	0	0	0	0	3175.6	0	0	0	0	0	0	0	0	11395	0	0	1255.6	1277.6	3315.1	0	0	0	0	0	0	0	0	0	0	0	0	13614	0	0
A0A669E1Q5	ADAM metallopeptidase with thrombospondin type 1 motif 3	adamts3	Oreochromis niloticus (Nile tilapia) (Tilapia nilotica)	extracellular matrix organization [GO:0030198]; proteolysis [GO:0006508]	extracellular region [GO:0005576]	metal ion binding [GO:0046872]; metalloendopeptidase activity [GO:0004222]	0.9653	-0.0097539	TRGAFSLPKGAR	0	0	0	0	0	0	0	0	1281.2	0	0	0	0	0	0	0	0	0	0	0	0	0	0	0	0	0	0	0	0	0	0	0	0	0	0	0	0	0	0	0
A0A669E1U9	Rho GTPase activating protein 12	arhgap12	Oreochromis niloticus (Nile tilapia) (Tilapia nilotica)	signal transduction [GO:0007165]		GTPase activator activity [GO:0005096]	1.0024	-1.4662	HPLTPSEK	0	0	0	0	0	0	0	0	0	0	0	0	0	0	0	0	0	0	0	0	0	0	0	0	0	0	0	0	0	0	0	0	0	0	0	0	0	0	0	0
A0A669E225	Suppressor of tumorigenicity 14 protein homolog	LOC100701219	Oreochromis niloticus (Nile tilapia) (Tilapia nilotica)	proteolysis [GO:0006508]	membrane [GO:0016020]	serine-type endopeptidase activity [GO:0004252]	0.98243	-0.74537	QSRLATAPDVK	0	0	0	0	0	0	0	0	0	0	0	0	0	0	0	0	0	0	0	0	0	0	0	0	0	0	0	0	0	0	0	0	0	0	0	0	0	0	0	0
A0A669E286	BCL2 interacting protein 2	bnip2	Oreochromis niloticus (Nile tilapia) (Tilapia nilotica)				1.0015	-1.4342	KKMPTVGWLR	0	0	0	0	0	0	0	0	0	0	0	0	0	0	0	0	0	0	0	0	0	0	0	0	0	0	0	0	0	0	0	0	0	0	0	0	0	0	0	0
A0A669E2A1	Phosphoinositide phospholipase C (EC 3.1.4.11)	LOC100701990	Oreochromis niloticus (Nile tilapia) (Tilapia nilotica)	intracellular signal transduction [GO:0035556]; lipid catabolic process [GO:0016042]		phosphatidylinositol phospholipase C activity [GO:0004435]	1.0116	-1.1741	VYPSPMR	0	0	0	0	0	0	0	0	0	0	0	0	0	0	0	0	0	0	0	0	0	0	0	0	0	0	0	0	0	0	0	0	0	0	0	0	0	0	0	0
A0A669E2A7	Protein kinase C (EC 2.7.11.13)	LOC100699493	Oreochromis niloticus (Nile tilapia) (Tilapia nilotica)	cell development [GO:0048468]; protein phosphorylation [GO:0006468]	cytoplasm [GO:0005737]; membrane [GO:0016020]	ATP binding [GO:0005524]; calcium-dependent protein kinase C activity [GO:0004698]; zinc ion binding [GO:0008270]	1.01	-1.1435	LEIPPPFKPR	1170.5	0	0	1208.9	0	1249.8	0	0	0	0	0	0	0	0	657.46	0	856.98	0	0	927.74	0	0	0	0	0	0	0	0	0	0	0	0	0	0	0	0	0	0	0	0
A0A669E2G1	Cullin 4B		Oreochromis niloticus (Nile tilapia) (Tilapia nilotica)	protein ubiquitination [GO:0016567]; ubiquitin-dependent protein catabolic process [GO:0006511]	cullin-RING ubiquitin ligase complex [GO:0031461]	ubiquitin protein ligase binding [GO:0031625]	0.98725	-0.58331	DIMVQFK	0	0	0	0	0	0	366.5	0	2505	0	0	0	0	0	0	0	0	0	2438.1	0	0	0	0	0	0	0	0	0	549.77	2961.6	0	0	0	0	0	0	0	0	0	0
A0A669E2H8	Adenylate cyclase type 6 (EC 4.6.1.1)		Oreochromis niloticus (Nile tilapia) (Tilapia nilotica)	cAMP biosynthetic process [GO:0006171]; intracellular signal transduction [GO:0035556]	plasma membrane [GO:0005886]	adenylate cyclase activity [GO:0004016]; ATP binding [GO:0005524]; metal ion binding [GO:0046872]	0.99544	-0.63073	KLERLYQR	0	0	0	0	0	0	0	0	0	0	0	0	777.06	0	0	0	0	0	0	0	791.2	0	0	0	0	0	0	0	0	0	0	0	0	0	0	0	0	0	1149.8	0
A0A669E2Y3	P2X purinoceptor	p2rx7	Oreochromis niloticus (Nile tilapia) (Tilapia nilotica)	response to ATP [GO:0033198]	plasma membrane [GO:0005886]; postsynapse [GO:0098794]	ATP binding [GO:0005524]; extracellularly ATP-gated monoatomic cation channel activity [GO:0004931]; purinergic nucleotide receptor activity [GO:0001614]	0.95652	0.080785	INIMMLWNR	0	0	0	0	0	0	0	0	0	0	0	0	0	0	0	501.84	0	0	0	1822.3	0	0	1387.7	0	0	0	0	0	0	0	900.24	981.61	0	0	0	0	0	0	0	797.31
A0A669E309	Extracellular matrix protein 2	ECM2	Oreochromis niloticus (Nile tilapia) (Tilapia nilotica)				1.0066	-1.2381	KNKLTSAGIDSK	0	0	0	0	0	0	0	0	0	0	0	0	0	0	0	0	0	0	0	0	0	0	0	0	0	0	0	0	0	0	0	0	0	0	0	0	0	0	0	0
A0A669E337	Scm polycomb group protein like 4		Oreochromis niloticus (Nile tilapia) (Tilapia nilotica)		nucleus [GO:0005634]		1.0013	-1.0518	GRKPGFK	0	0	0	0	0	0	0	0	0	0	0	0	0	0	0	0	0	0	0	0	0	0	0	0	0	0	0	0	0	0	0	0	0	0	0	589.48	0	0	0	0
A0A669E349	Cytohesin 2	CYTH2	Oreochromis niloticus (Nile tilapia) (Tilapia nilotica)	regulation of ARF protein signal transduction [GO:0032012]		guanyl-nucleotide exchange factor activity [GO:0005085]	0.99282	-0.18185	RKGVLLQEIQR	0	0	0	0	0	0	0	0	0	0	0	0	0	0	0	0	0	0	0	0	0	0	0	0	0	0	0	0	0	0	0	0	0	0	0	0	0	0	0	0
A0A669E3G1	Integrase catalytic domain-containing protein		Oreochromis niloticus (Nile tilapia) (Tilapia nilotica)	DNA integration [GO:0015074]		nucleic acid binding [GO:0003676]	0.98198	-0.74569	LRNYHRSK	1093.9	1127.4	1187.6	608.99	565.43	586.59	1651.7	1676.1	1534.5	455.53	0	0	0	405.4	0	606.36	515.65	560.25	692.53	649.68	0	522	509.75	536.89	0	0	338.61	707.47	793.65	895.78	994.84	969.16	974.64	709	696.72	692.24	560.69	482.66	540.44	494.04
A0A669E3M8	G protein-coupled receptor kinase (EC 2.7.11.-)	grk3	Oreochromis niloticus (Nile tilapia) (Tilapia nilotica)	protein phosphorylation [GO:0006468]; signal transduction [GO:0007165]	cytoplasm [GO:0005737]	ATP binding [GO:0005524]; beta-adrenergic receptor kinase activity [GO:0047696]; G protein-coupled receptor kinase activity [GO:0004703]	0.99495	-0.63073	DKKCILLR	0	0	0	0	0	0	0	0	0	0	0	0	0	0	0	0	0	0	0	0	0	0	0	0	0	0	0	0	0	0	0	0	0	0	0	0	0	0	0	0
A0A669E3P0	ribonuclease H (EC 3.1.26.4)		Oreochromis niloticus (Nile tilapia) (Tilapia nilotica)	DNA integration [GO:0015074]		nucleic acid binding [GO:0003676]	1.0013	-1.0518	LLREWDR	0	0	0	0	0	0	861.98	0	0	0	0	0	0	0	0	0	0	0	0	0	0	0	0	0	0	0	0	0	0	0	0	0	0	0	0	0	0	0	0	0
A0A669E3W3	Ribosomal RNA-processing protein 40	exosc3	Oreochromis niloticus (Nile tilapia) (Tilapia nilotica)	regulation of gene expression [GO:0010468]; rRNA processing [GO:0006364]	cytoplasm [GO:0005737]; exosome (RNase complex) [GO:0000178]	RNA binding [GO:0003723]	1.0019	-1.4662	ISLTAPVK	0	0	0	418.69	444.13	0	0	0	584.15	0	0	0	337.69	0	0	0	0	0	0	0	0	0	0	0	0	0	1066.1	0	0	0	0	0	0	0	449.46	394.29	0	0	0	0
A0A669E422	Nitrilase family, member 2		Oreochromis niloticus (Nile tilapia) (Tilapia nilotica)	nitrogen compound metabolic process [GO:0006807]		hydrolase activity, acting on carbon-nitrogen (but not peptide) bonds, in linear amides [GO:0016811]	0.99213	-0.33863	TRRIQGF	0	0	0	0	0	0	964.81	0	0	0	0	0	759.43	0	0	0	0	0	0	0	973.7	0	0	0	0	0	0	0	0	0	0	0	0	0	0	0	0	452.58	0	821.42
A0A669E473	Cullin-associated and neddylation-dissociated 1		Oreochromis niloticus (Nile tilapia) (Tilapia nilotica)	SCF complex assembly [GO:0010265]			1.0041	-1.0956	HTVDDGLDLR	0	0	0	0	0	0	388.97	0	0	0	0	0	0	0	0	0	0	0	0	0	0	0	0	0	0	0	0	0	0	0	0	0	0	0	0	0	0	0	0	0
A0A669E4B8	DNA topoisomerase I (EC 5.6.2.1) (DNA topoisomerase 1)		Oreochromis niloticus (Nile tilapia) (Tilapia nilotica)	DNA topological change [GO:0006265]	chromosome [GO:0005694]; membrane [GO:0016020]; nucleus [GO:0005634]	DNA binding [GO:0003677]; DNA topoisomerase type I (single strand cut, ATP-independent) activity [GO:0003917]	1.0044	-1.0956	IEEQLMK	0	0	0	0	0	0	0	0	0	0	0	0	0	0	0	0	0	0	0	0	0	0	0	0	0	0	0	0	0	0	0	0	0	0	0	0	0	0	0	0
A0A669E4C5	Programmed cell death protein 4	LOC100708189	Oreochromis niloticus (Nile tilapia) (Tilapia nilotica)	negative regulation of DNA-templated transcription [GO:0045892]	cytoplasm [GO:0005737]		1.0103	-1.1741	LLQSFWK	0	0	0	0	0	0	0	0	0	0	0	0	0	0	0	0	0	0	0	0	0	0	0	0	0	0	0	0	0	0	0	0	0	0	0	0	0	0	0	0
A0A669E4E6	Rho guanine nucleotide exchange factor 9 (Collybistin) (Rac/Cdc42 guanine nucleotide exchange factor 9)	arhgef9	Oreochromis niloticus (Nile tilapia) (Tilapia nilotica)		cytoplasm [GO:0005737]; postsynaptic density [GO:0014069]	guanyl-nucleotide exchange factor activity [GO:0005085]	0.99627	-4.1539	DICEGYLR	0	0	0	0	0	0	0	673.44	0	0	523.32	0	0	0	0	0	0	0	0	0	0	0	475.2	1511.1	0	0	0	0	0	0	0	0	0	0	0	0	0	0	0	0
A0A669E4J5	ribonuclease H (EC 3.1.26.4)		Oreochromis niloticus (Nile tilapia) (Tilapia nilotica)	DNA integration [GO:0015074]; proteolysis [GO:0006508]		aspartic-type endopeptidase activity [GO:0004190]; nucleic acid binding [GO:0003676]; RNA-directed DNA polymerase activity [GO:0003964]	0.98237	-0.39719	VKNWVRPTNRK	0	0	0	0	0	0	0	0	0	0	0	0	0	0	0	0	0	0	0	0	0	0	0	0	0	0	0	0	0	0	0	0	0	0	0	0	0	0	0	0
A0A669E4Q3	Heat shock protein family A (Hsp70) member 4	hspa4	Oreochromis niloticus (Nile tilapia) (Tilapia nilotica)			ATP binding [GO:0005524]; ATP-dependent protein folding chaperone [GO:0140662]	0.99802	-1.0538	NTVQGFKK	0	0	0	0	0	0	0	1277.5	0	0	0	0	0	0	0	0	0	0	1234.1	0	0	0	0	0	0	0	0	0	0	0	907.45	0	0	0	0	0	0	0	0	0
A0A669E4S3	Uncharacterized LOC102075892	LOC102075892	Oreochromis niloticus (Nile tilapia) (Tilapia nilotica)	proteolysis [GO:0006508]		cysteine-type peptidase activity [GO:0008234]	0.98489	-0.60589	NAKPYVKPAVLTSK	0	0	0	0	0	0	0	0	0	0	0	0	0	0	0	0	0	0	0	0	0	0	0	0	0	0	0	0	0	0	0	0	0	0	0	0	0	0	0	0
A0A669E4U8	Uncharacterized LOC100708399	LOC100708399	Oreochromis niloticus (Nile tilapia) (Tilapia nilotica)			GTP binding [GO:0005525]	1.0067	-1.3439	QKIGTLTR	0	0	0	0	0	0	0	0	0	0	0	0	0	0	0	0	0	0	0	0	0	0	0	0	0	0	0	0	0	0	0	0	0	0	0	0	0	0	0	0
A0A669E4V2	Uncharacterized protein		Oreochromis niloticus (Nile tilapia) (Tilapia nilotica)				1.0098	-0.26014	HNKLLALSRR	0	0	0	0	0	0	0	0	0	0	0	0	0	0	0	0	0	0	0	0	0	0	0	0	0	0	0	0	0	0	0	0	0	0	0	0	0	0	0	0
A0A669E512	ATP-dependent DNA helicase (EC 3.6.4.12)		Oreochromis niloticus (Nile tilapia) (Tilapia nilotica)	DNA recombination [GO:0006310]; DNA repair [GO:0006281]; telomere maintenance [GO:0000723]		ATP binding [GO:0005524]; DNA helicase activity [GO:0003678]; hydrolase activity [GO:0016787]	1.0002	-2.2316	NELPDTLK	0	0	0	0	0	0	0	0	0	0	0	0	0	0	0	0	0	0	0	0	0	0	0	0	0	340.7	371.44	0	0	0	0	0	0	0	0	0	0	0	0	0
A0A669E5E6	Protein Wnt	LOC100695663	Oreochromis niloticus (Nile tilapia) (Tilapia nilotica)	animal organ development [GO:0048513]; Wnt signaling pathway [GO:0016055]	extracellular region [GO:0005576]	signaling receptor binding [GO:0005102]	0.97596	0.015402	EKYDSAVAMKLNSR	0	0	0	0	0	0	0	0	0	0	0	0	0	0	0	0	0	0	0	0	0	0	0	0	0	892.82	0	1854.6	0	0	0	1380.2	0	0	0	0	0	0	0	0
A0A669E5K2	3-oxo-5-alpha-steroid 4-dehydrogenase (EC 1.3.1.22)	srd5a2	Oreochromis niloticus (Nile tilapia) (Tilapia nilotica)	androgen biosynthetic process [GO:0006702]; sex differentiation [GO:0007548]	membrane [GO:0016020]	3-oxo-5-alpha-steroid 4-dehydrogenase activity [GO:0003865]; cholestenone 5-alpha-reductase activity [GO:0047751]	1.0045	-1.3691	ALVPFIF	0	0	0	998.11	0	0	1313.1	0	0	679.69	697.28	0	669.18	0	0	675.8	0	0	0	777.73	0	0	0	0	1127	0	457.37	814.25	0	784.3	0	740.92	758.96	0	509.91	0	0	0	0	0
A0A669E5M9	Calcium channel, voltage-dependent, alpha 2/delta subunit 4a		Oreochromis niloticus (Nile tilapia) (Tilapia nilotica)		membrane [GO:0016020]		0.98917	-0.0071776	LLVEELHVKGEGKVK	0	0	0	0	0	0	0	0	0	0	0	0	0	0	0	0	0	0	0	0	0	0	0	0	0	0	0	0	0	0	0	0	0	0	0	0	0	0	0	0
A0A669E5V6	Protein NLRC3-like	LOC100702410	Oreochromis niloticus (Nile tilapia) (Tilapia nilotica)				1.0134	-1.1741	IAVHFLR	0	0	0	0	0	0	0	0	0	0	0	0	0	0	0	0	0	0	0	0	0	0	0	0	0	0	10794	0	0	0	0	0	0	0	0	0	0	0	0	0
A0A669E5W5	ATP-binding cassette, sub-family C (CFTR/MRP), member 4		Oreochromis niloticus (Nile tilapia) (Tilapia nilotica)		membrane [GO:0016020]	ABC-type transporter activity [GO:0140359]; ATP binding [GO:0005524]; ATP hydrolysis activity [GO:0016887]	0.99237	-0.31697	RKEIHQILK	0	0	4672.1	0	0	0	0	0	0	0	0	0	0	0	0	0	0	0	0	0	0	0	0	0	0	0	0	0	0	0	0	0	0	0	0	0	0	0	0	0
A0A669E5Y9	Golgin subfamily A member 7	LOC102076673	Oreochromis niloticus (Nile tilapia) (Tilapia nilotica)		membrane [GO:0016020]		1.0104	-1.3439	YIKDQNEK	0	0	0	0	0	0	0	0	6044.2	0	0	0	0	0	0	0	0	0	0	0	0	0	0	2213.2	0	0	0	0	0	0	0	0	0	0	0	0	0	0	0	0
A0A669E677	Cdc42 effector protein 1	LOC102078793	Oreochromis niloticus (Nile tilapia) (Tilapia nilotica)		endomembrane system [GO:0012505]		1.0093	-1.1741	TPDASAR	0	0	0	0	0	0	0	0	0	0	0	0	0	0	0	0	0	0	0	0	0	0	0	0	0	0	0	0	0	0	0	0	0	0	0	0	0	0	0	0
A0A669E6F1	Exosome component 10	exosc10	Oreochromis niloticus (Nile tilapia) (Tilapia nilotica)	exonucleolytic trimming to generate mature 3'-end of 5.8S rRNA from tricistronic rRNA transcript (SSU-rRNA, 5.8S rRNA, LSU-rRNA) [GO:0000467]	nuclear exosome (RNase complex) [GO:0000176]	3'-5'-RNA exonuclease activity [GO:0000175]; nucleic acid binding [GO:0003676]; nucleotide binding [GO:0000166]	0.98586	-0.11515	NITRPQLKFKEK	0	687.55	0	834.73	0	0	945.22	0	0	0	0	0	0	0	0	0	0	0	0	699.2	0	0	0	0	0	0	0	0	0	0	0	0	0	0	0	0	0	0	0	0
A0A669E6I5	Integrase catalytic domain-containing protein		Oreochromis niloticus (Nile tilapia) (Tilapia nilotica)	DNA integration [GO:0015074]		nucleic acid binding [GO:0003676]	0.9403	0.045269	ASVKLVSSR	0	0	0	0	0	0	0	0	0	0	0	0	0	0	0	0	0	0	0	0	0	0	0	0	0	0	0	0	0	0	0	0	0	0	0	0	0	0	0	0
A0A669E6J0	FYVE, RhoGEF and PH domain-containing protein 4	LOC100709969	Oreochromis niloticus (Nile tilapia) (Tilapia nilotica)		cytoplasm [GO:0005737]; cytoskeleton [GO:0005856]	guanyl-nucleotide exchange factor activity [GO:0005085]; metal ion binding [GO:0046872]	1.006	-1.0956	VLLQHAPFLR	0	0	0	0	0	0	0	0	0	0	0	0	0	0	0	0	0	0	0	0	0	0	0	0	0	0	0	0	0	0	0	0	0	0	0	0	0	0	0	0
A0A669E6K3	Dystonin	DST	Oreochromis niloticus (Nile tilapia) (Tilapia nilotica)	intermediate filament cytoskeleton organization [GO:0045104]	cell projection [GO:0042995]; cytoplasm [GO:0005737]; membrane [GO:0016020]; microtubule [GO:0005874]	actin binding [GO:0003779]; calcium ion binding [GO:0005509]; microtubule binding [GO:0008017]	0.98339	-0.53779	SAQLSSLLQEVK	0	0	0	0	0	0	0	0	0	0	0	0	0	0	0	0	0	0	0	0	0	0	0	0	0	0	0	0	0	0	0	0	0	0	0	0	0	0	0	0
A0A669E6U2	procollagen-proline 3-dioxygenase (EC 1.14.11.7)		Oreochromis niloticus (Nile tilapia) (Tilapia nilotica)	collagen metabolic process [GO:0032963]	membrane [GO:0016020]	iron ion binding [GO:0005506]; L-ascorbic acid binding [GO:0031418]; procollagen-proline 3-dioxygenase activity [GO:0019797]	0.90909	0.066196	SLLLFYPSDK	0	0	0	1819.5	0	1738.1	0	0	0	0	0	0	624.46	0	0	1348.7	0	1334.5	0	1147	0	980.91	0	0	0	0	0	0	0	0	0	0	1374.6	0	0	1076	0	0	0	0
A0A669E7C4	SUN domain-containing protein 1	LOC100710707	Oreochromis niloticus (Nile tilapia) (Tilapia nilotica)		membrane [GO:0016020]		0.97134	-0.14492	EEESKQR	0	0	0	0	0	0	0	0	0	0	0	0	0	0	0	0	0	0	0	0	0	0	0	0	0	0	0	0	0	0	0	0	0	0	0	0	0	0	0	0
A0A669E7G7	SGNH hydrolase-type esterase domain-containing protein		Oreochromis niloticus (Nile tilapia) (Tilapia nilotica)				0.98584	-0.60558	YLKTILKPKSTGER	0	0	0	0	0	500.39	0	0	0	0	0	0	0	0	0	0	0	0	0	0	0	0	0	0	0	0	0	0	0	0	0	0	0	0	0	0	0	0	0	0
A0A669E7G8	Gastrula zinc finger protein XlCGF8.2DB-like	LOC112847820	Oreochromis niloticus (Nile tilapia) (Tilapia nilotica)				0.98532	-0.60558	RSLKSHQLIHSGVK	0	0	0	0	0	0	0	0	563.78	0	0	0	0	0	0	0	0	0	0	0	0	0	0	0	0	0	0	0	0	0	0	0	0	0	0	0	0	0	0	0
A0A669E7Z5	Amino acid transporter	LOC100701901	Oreochromis niloticus (Nile tilapia) (Tilapia nilotica)	L-alpha-amino acid transmembrane transport [GO:1902475]	membrane [GO:0016020]	symporter activity [GO:0015293]	1.0057	-0.10129	ERVRTVSVSIYLLV	0	0	0	0	0	0	540.02	0	572.17	0	0	0	0	0	0	0	0	0	0	0	0	0	0	0	0	0	0	0	0	0	0	0	0	0	0	0	0	0	0	0
A0A669E8A1	Si:ch211-284e13.4		Oreochromis niloticus (Nile tilapia) (Tilapia nilotica)	insulin receptor signaling pathway [GO:0008286]		insulin receptor binding [GO:0005158]	0.98374	-0.74001	GGGVGYSKR	0	0	0	0	0	0	0	0	0	0	0	0	0	0	0	0	0	0	0	0	0	0	0	0	0	0	0	0	0	0	0	0	0	0	0	0	0	0	0	0
A0A669E8L0	C3H1-type domain-containing protein	LOC100702635	Oreochromis niloticus (Nile tilapia) (Tilapia nilotica)	negative regulation of DNA-templated transcription [GO:0045892]; RNA metabolic process [GO:0016070]		metal ion binding [GO:0046872]; RNA binding [GO:0003723]	1.0089	-1.5445	LSKGFSNR	0	0	0	0	0	0	0	0	0	0	0	0	0	0	0	0	0	0	0	0	0	0	0	0	0	0	0	0	0	0	0	0	0	0	0	0	0	0	0	0
A0A669E8M1	F-actin-uncapping protein LRRC16A	LOC100710447	Oreochromis niloticus (Nile tilapia) (Tilapia nilotica)		cytoplasm [GO:0005737]		0.98804	-0.6534	TVFSHRK	0	0	0	0	0	947.91	0	0	1825.9	0	0	621.28	0	0	0	0	0	0	0	0	0	1025.7	0	0	648.39	694.25	0	1281.8	1366.7	0	0	0	0	555.1	0	0	0	1102.6	906.21	738.44
A0A669E8N1	Pumilio RNA binding family member 2	pum2	Oreochromis niloticus (Nile tilapia) (Tilapia nilotica)			lipid transporter activity [GO:0005319]; RNA binding [GO:0003723]	0.99707	-4.8246	NIMVPVQELLNELYAFDFK	0	0	0	0	0	0	0	0	0	0	0	0	0	0	0	0	0	0	4085.6	0	0	0	0	0	0	0	0	0	0	0	0	0	0	0	0	0	0	0	0	0
A0A669E8N3	Synaptic Ras GTPase activating protein 1a		Oreochromis niloticus (Nile tilapia) (Tilapia nilotica)	regulation of GTPase activity [GO:0043087]	membrane [GO:0016020]	GTPase activator activity [GO:0005096]	0.99455	-2.805	AVKPNKDNSR	0	0	0	0	0	0	0	2049.7	0	0	0	0	0	0	0	0	1055.8	0	0	0	0	0	0	0	0	0	0	0	0	0	0	0	0	0	0	0	0	0	0	0
A0A669E8R5	NACHT domain-containing protein		Oreochromis niloticus (Nile tilapia) (Tilapia nilotica)				1.0036	-0.97329	VLDLSLNKLK	0	0	0	0	0	0	0	305.12	0	0	0	0	0	0	0	0	0	0	0	0	0	0	0	0	0	0	0	0	0	0	0	0	0	0	0	0	0	0	0	0
A0A669E8R7	Neogenin 1	neo1	Oreochromis niloticus (Nile tilapia) (Tilapia nilotica)		membrane [GO:0016020]		1.0117	-1.1615	LELKPMDK	0	0	11897	0	0	0	0	0	0	0	0	0	0	0	0	0	0	0	0	0	8637	0	0	0	0	0	0	0	0	0	0	0	0	0	0	0	0	0	0	0
A0A669E8S9	C-type lectin domain family 10 member A	LOC100701822	Oreochromis niloticus (Nile tilapia) (Tilapia nilotica)		membrane [GO:0016020]		0.96923	-0.16713	TVDFSRFSRYR	0	0	0	0	0	0	0	0	0	0	910.9	0	0	0	0	0	0	0	0	0	0	0	0	0	0	0	0	0	0	0	0	0	0	0	0	0	0	0	0	0
A0A669E947	Natural killer cell triggering receptor	nktr	Oreochromis niloticus (Nile tilapia) (Tilapia nilotica)	protein folding [GO:0006457]; protein peptidyl-prolyl isomerization [GO:0000413]		peptidyl-prolyl cis-trans isomerase activity [GO:0003755]	0.97854	-0.39773	STNRHKSR	0	0	0	0	0	0	0	0	0	0	0	0	0	0	0	0	0	0	0	0	0	0	0	0	0	0	0	0	0	0	0	0	0	0	0	0	0	0	0	0
A0A669E9B7	SAM and SH3 domain containing 1	sash1	Oreochromis niloticus (Nile tilapia) (Tilapia nilotica)		cellular anatomical entity [GO:0110165]		1.0062	0.031727	THPKKPPIPPPVPAK	516.36	0	0	0	0	0	0	0	0	0	0	0	0	0	0	0	0	0	852.89	0	842.9	0	0	0	0	0	0	0	0	0	0	0	0	0	0	0	0	0	0	709.51
A0A669E9M9	PiggyBac transposable element-derived protein 3	LOC102080225	Oreochromis niloticus (Nile tilapia) (Tilapia nilotica)				0.98814	-0.11515	NRLKQYLPSKPK	0	1019.2	0	1289.1	1219.4	1247.6	0	0	0	0	0	0	0	0	448.98	0	858.69	766.01	1791.3	1618.8	0	0	0	0	0	701.43	0	0	0	0	0	0	0	0	0	0	0	0	0	0
A0A669E9N0	Transmembrane protein 62	tmem62	Oreochromis niloticus (Nile tilapia) (Tilapia nilotica)		membrane [GO:0016020]	hydrolase activity [GO:0016787]	1.0106	-1.1741	VEDAAGR	0	0	0	0	0	0	0	0	0	0	0	0	0	0	0	0	0	0	0	0	0	0	0	0	0	0	0	0	0	0	0	0	0	0	0	0	0	0	0	0
A0A669E9Q7	Interleukin 17 receptor E	il17re	Oreochromis niloticus (Nile tilapia) (Tilapia nilotica)	inflammatory response [GO:0006954]	membrane [GO:0016020]	interleukin-17 receptor activity [GO:0030368]	0.99803	-3.6583	DGAKLCDDK	0	0	0	0	0	0	0	0	0	0	0	0	0	0	0	0	0	0	0	0	0	0	0	0	0	0	0	0	0	0	0	0	0	0	0	0	3851.4	3647.6	0	0
A0A669E9X5	FAT atypical cadherin 3b		Oreochromis niloticus (Nile tilapia) (Tilapia nilotica)	homophilic cell adhesion via plasma membrane adhesion molecules [GO:0007156]	plasma membrane [GO:0005886]	calcium ion binding [GO:0005509]	1.0029	-1.078	AARAPVR	0	251.7	0	0	0	0	0	345.29	0	0	0	284.95	0	0	0	0	0	0	0	0	0	0	0	0	0	0	0	0	0	0	0	0	0	0	0	0	0	0	0	0
A0A669E9Y6	AIG1-type G domain-containing protein		Oreochromis niloticus (Nile tilapia) (Tilapia nilotica)			GTP binding [GO:0005525]	0.92481	0.046552	YEAGILKLMEEVVDLEMEK	0	0	0	0	0	0	1066	0	0	0	0	0	0	0	0	0	0	0	0	0	0	0	0	0	0	0	0	0	0	0	0	0	0	0	0	0	0	0	0	0
A0A669EA73	Cullin 4A		Oreochromis niloticus (Nile tilapia) (Tilapia nilotica)	protein ubiquitination [GO:0016567]; ubiquitin-dependent protein catabolic process [GO:0006511]	membrane [GO:0016020]	ubiquitin protein ligase binding [GO:0031625]	1.0004	-1.9552	FPVKVIK	0	0	0	0	0	0	0	0	0	0	0	0	0	0	0	0	0	0	0	0	0	0	0	0	0	0	0	0	0	0	0	0	0	0	0	0	0	0	0	0
A0A669EA94	Reverse transcriptase domain-containing protein		Oreochromis niloticus (Nile tilapia) (Tilapia nilotica)			catalytic activity [GO:0003824]	1.002	-1.0551	ILTNQTLSTQFKLSRGTR	0	0	0	0	0	0	0	0	0	0	0	0	0	0	0	0	0	0	0	0	0	517.65	0	0	0	0	0	0	0	0	0	0	0	0	0	0	0	0	0	0
A0A669EAF0	UDP-glucose glycoprotein glucosyltransferase 1	uggt1	Oreochromis niloticus (Nile tilapia) (Tilapia nilotica)	protein glycosylation [GO:0006486]	endoplasmic reticulum lumen [GO:0005788]	UDP-glucose:glycoprotein glucosyltransferase activity [GO:0003980]	0.99199	-0.33732	LSVGDVVKVLEKK	0	0	0	0	0	0	0	0	0	0	0	0	0	0	0	0	0	0	0	0	0	0	0	0	0	0	0	0	0	0	0	0	0	0	0	0	0	0	0	0
A0A669EAG9	Basonuclin 2	bnc2	Oreochromis niloticus (Nile tilapia) (Tilapia nilotica)				1.0036	-0.97329	AEGRADGGYR	0	0	0	0	0	0	0	0	0	0	0	0	0	0	0	0	0	0	0	0	0	0	0	0	0	0	0	0	0	0	0	0	0	0	0	0	0	0	0	0
A0A669EAH0	Rho GTPase-activating protein 7	LOC100692827	Oreochromis niloticus (Nile tilapia) (Tilapia nilotica)	lipid transport [GO:0006869]; signal transduction [GO:0007165]	cytoplasm [GO:0005737]	GTPase activator activity [GO:0005096]; lipid binding [GO:0008289]	1.0016	-1.0538	RDHHFLDK	0	0	0	0	0	0	0	0	0	0	0	0	0	0	0	0	0	0	0	0	0	0	0	0	0	0	0	0	0	0	0	0	0	0	0	0	0	0	0	0
A0A669EAR7	Cell death inducing DFFA like effector c	cidec	Oreochromis niloticus (Nile tilapia) (Tilapia nilotica)	apoptotic process [GO:0006915]			0.99826	-1.0301	VLNADRSVK	0	0	0	0	0	0	0	0	0	0	0	0	0	0	0	0	0	0	0	0	0	0	0	0	0	0	0	0	0	0	0	0	0	0	0	0	0	0	0	0
A0A669EAW1	non-specific serine/threonine protein kinase (EC 2.7.11.1)	atm	Oreochromis niloticus (Nile tilapia) (Tilapia nilotica)	DNA repair [GO:0006281]; phosphorylation [GO:0016310]	nucleus [GO:0005634]	ATP binding [GO:0005524]; protein serine/threonine kinase activity [GO:0004674]	1.0007	-1.4451	AAAQCLK	0	0	0	0	1667.6	0	0	0	0	0	0	0	0	0	0	0	0	0	0	0	0	0	0	0	0	0	0	0	0	0	0	0	0	0	0	0	0	0	0	0
A0A669EB70	Membrane integral NOTCH2 associated receptor 1	MINAR1	Oreochromis niloticus (Nile tilapia) (Tilapia nilotica)		membrane [GO:0016020]		1.0007	-1.0518	DGKASQR	0	0	0	0	0	0	0	0	0	0	0	0	0	0	0	0	0	0	0	0	0	0	0	0	0	0	0	0	0	0	0	0	0	0	0	0	0	0	0	0
A0A669EBA6	Phosphate carrier protein, mitochondrial (Phosphate transport protein) (Solute carrier family 25 member 3)	slc25a3	Oreochromis niloticus (Nile tilapia) (Tilapia nilotica)	mitochondrial phosphate ion transmembrane transport [GO:1990547]	mitochondrial inner membrane [GO:0005743]	inorganic phosphate transmembrane transporter activity [GO:0005315]; symporter activity [GO:0015293]	1.0096	-1.2689	EDGVRGLAK	0	0	0	0	0	0	0	0	0	0	0	0	0	0	0	0	0	0	0	0	0	0	0	0	0	0	0	0	0	0	0	0	0	0	0	0	0	0	0	0
A0A669EBB6	Polypeptide N-acetylgalactosaminyltransferase (EC 2.4.1.-) (Protein-UDP acetylgalactosaminyltransferase)	galnt13	Oreochromis niloticus (Nile tilapia) (Tilapia nilotica)	protein glycosylation [GO:0006486]	Golgi membrane [GO:0000139]	carbohydrate binding [GO:0030246]; polypeptide N-acetylgalactosaminyltransferase activity [GO:0004653]	0.98624	-0.76167	KLENYVR	0	0	0	0	0	0	0	0	0	0	0	0	0	0	0	0	0	0	0	0	0	0	0	0	0	0	0	0	0	0	0	0	0	0	0	0	0	0	0	0
A0A669EBF6	Proline-, glutamic acid- and leucine-rich protein 1	LOC100696643	Oreochromis niloticus (Nile tilapia) (Tilapia nilotica)		membrane [GO:0016020]		1	-0.19503	LRIQQQQRQR	0	0	0	0	0	0	0	0	0	0	0	0	0	0	0	0	0	0	0	0	0	0	0	0	0	0	0	0	0	0	0	0	0	0	0	0	0	0	0	0
A0A669EBH2	Ribosomal protein S14	RPS14	Oreochromis niloticus (Nile tilapia) (Tilapia nilotica)	translation [GO:0006412]	ribonucleoprotein complex [GO:1990904]; ribosome [GO:0005840]	structural constituent of ribosome [GO:0003735]	0.97981	-0.099711	FVFLFILKFLTK	0	0	0	0	0	0	0	0	0	0	0	0	0	0	0	0	0	0	0	0	0	384.87	0	0	0	0	0	0	0	0	0	0	0	0	0	0	0	0	0	0
A0A669EBI2	Phospholipid-transporting ATPase (EC 7.6.2.1)	LOC100707985	Oreochromis niloticus (Nile tilapia) (Tilapia nilotica)	phospholipid transport [GO:0015914]	membrane [GO:0016020]	ATP binding [GO:0005524]; ATP hydrolysis activity [GO:0016887]; ATPase-coupled intramembrane lipid transporter activity [GO:0140326]; magnesium ion binding [GO:0000287]	1.0027	-2.1483	GADTIIYER	0	0	0	0	0	0	0	0	0	0	0	0	0	0	0	0	0	0	0	0	0	0	0	0	0	0	0	0	0	2979.9	0	0	0	0	0	0	0	0	0	0
A0A669EBP6	U3 small nucleolar RNA-associated protein 11 (U3 snoRNA-associated protein 11)	utp11	Oreochromis niloticus (Nile tilapia) (Tilapia nilotica)	rRNA processing [GO:0006364]	nucleolus [GO:0005730]; small-subunit processome [GO:0032040]		0.98659	-0.36513	QRKHQYK	0	0	0	0	0	0	0	0	0	0	806.34	0	0	0	0	0	0	0	0	0	0	0	0	0	0	0	0	0	0	0	0	0	0	0	0	0	0	0	0	0
A0A669EBS6	Ribosomal protein L15	rpl15	Oreochromis niloticus (Nile tilapia) (Tilapia nilotica)	translation [GO:0006412]	ribonucleoprotein complex [GO:1990904]; ribosome [GO:0005840]	structural constituent of ribosome [GO:0003735]	0.99243	-0.31697	RRNTLQLHR	0	0	0	0	0	0	0	0	0	0	0	0	0	0	0	0	0	0	0	0	0	0	0	0	0	0	0	0	0	0	0	0	0	0	0	0	0	0	0	0
A0A669EBW3	Protocadherin alpha-C2	LOC102079396	Oreochromis niloticus (Nile tilapia) (Tilapia nilotica)	homophilic cell adhesion via plasma membrane adhesion molecules [GO:0007156]	plasma membrane [GO:0005886]	calcium ion binding [GO:0005509]	0.99344	-0.33863	MKDRISK	0	0	0	0	0	0	0	0	0	0	0	0	0	0	0	0	0	0	0	0	0	0	0	0	0	0	0	0	0	0	0	0	0	0	0	0	0	0	0	0
A0A669EBZ5	FRAS1 related extracellular matrix 3	frem3	Oreochromis niloticus (Nile tilapia) (Tilapia nilotica)	cell adhesion [GO:0007155]; cell communication [GO:0007154]	membrane [GO:0016020]		0.9829	-0.45417	FVAEAPYSTIGK	0	0	0	0	0	0	0	0	0	0	0	0	0	0	0	0	0	0	0	0	0	0	0	0	0	0	0	0	0	0	0	0	0	0	0	0	0	0	0	0
A0A669EBZ7	RING-type E3 ubiquitin transferase (EC 2.3.2.27)	LOC100711508	Oreochromis niloticus (Nile tilapia) (Tilapia nilotica)				0.98293	-0.63073	IKEGKSVR	0	0	0	0	0	612.92	0	0	0	0	0	0	0	0	0	0	0	0	483.2	0	0	0	0	0	0	0	0	0	0	0	0	0	0	0	0	0	0	0	0	0
A0A669EC25	Centrosomal protein of 170 kDa protein B	CEP170B	Oreochromis niloticus (Nile tilapia) (Tilapia nilotica)				0.97788	-0.098279	YAGSGSRRR	0	0	0	0	0	0	0	0	0	0	0	0	0	0	0	0	0	0	0	0	0	0	6171.4	0	0	0	0	0	0	0	0	0	0	0	0	0	0	0	0	0
A0A669EC40	RAS protein activator like 1	RASAL1	Oreochromis niloticus (Nile tilapia) (Tilapia nilotica)	cellular response to calcium ion [GO:0071277]; intracellular signal transduction [GO:0035556]; negative regulation of Ras protein signal transduction [GO:0046580]; regulation of GTPase activity [GO:0043087]		GTPase activator activity [GO:0005096]; metal ion binding [GO:0046872]	1.0113	-1.1741	VSIYNER	0	0	0	0	0	0	0	0	0	0	0	0	0	2157.3	0	0	0	0	0	0	0	0	0	0	2372.5	0	0	0	0	0	0	0	0	0	0	0	0	0	0	0
A0A669ECN6	SUN domain containing ossification factor		Oreochromis niloticus (Nile tilapia) (Tilapia nilotica)		membrane [GO:0016020]		0.99959	-2.493	KQMEEMQK	4256.2	4208.5	0	0	0	0	6656.1	7224.8	6533.4	1525.3	0	0	0	1105.7	982.13	0	0	0	0	0	0	0	0	0	0	0	0	2639.8	2529.7	0	2723	0	2815.2	0	2003.9	0	1767	1386.3	0	0
A0A669ECR2	ATP-dependent RNA helicase (EC 3.6.4.13)		Oreochromis niloticus (Nile tilapia) (Tilapia nilotica)			ATP binding [GO:0005524]; hydrolase activity [GO:0016787]; RNA binding [GO:0003723]; RNA helicase activity [GO:0003724]	1.01	-1.3072	ILSKPLEIQVGGR	0	0	0	0	0	0	0	0	0	0	0	0	0	0	0	0	0	0	0	0	0	0	0	0	0	0	0	0	0	0	0	0	0	0	0	0	720.09	0	0	0
A0A669ECV3	Cathepsin L	LOC100705613	Oreochromis niloticus (Nile tilapia) (Tilapia nilotica)	proteolysis [GO:0006508]		cysteine-type peptidase activity [GO:0008234]	1.0022	-1.4662	MCSSAVVN	0	0	0	0	0	0	0	0	0	0	0	0	0	0	0	0	0	0	0	0	0	0	0	0	0	0	0	0	0	0	0	0	0	0	0	0	0	0	0	0
A0A669ECV5	Protein piccolo	LOC106097889	Oreochromis niloticus (Nile tilapia) (Tilapia nilotica)		cell projection [GO:0042995]; organelle [GO:0043226]; presynaptic active zone [GO:0048786]	metal ion binding [GO:0046872]	0.99301	-0.31697	SQPVSPKRK	0	0	0	0	0	0	0	0	0	0	0	0	0	0	0	0	0	0	0	0	0	0	0	0	0	0	0	0	0	0	0	0	0	0	0	0	0	0	0	0
A0A669ECW5	Otoferlin	otof	Oreochromis niloticus (Nile tilapia) (Tilapia nilotica)		membrane [GO:0016020]	metal ion binding [GO:0046872]	1.0119	-1.1741	ALMVHLK	0	0	0	0	0	0	0	0	0	0	0	0	0	0	0	0	0	0	0	0	0	0	0	0	0	0	0	0	0	0	0	0	0	0	0	0	0	0	0	0
A0A669ECY9	Phosphatidylinositol transfer protein membrane associated 2	PITPNM2	Oreochromis niloticus (Nile tilapia) (Tilapia nilotica)		cellular anatomical entity [GO:0110165]	metal ion binding [GO:0046872]; phospholipid transporter activity [GO:0005548]	0.97214	-0.17033	CRTLLNE	0	0	0	0	0	0	0	0	0	0	0	0	0	0	0	0	0	0	0	0	0	0	0	0	0	0	0	0	0	0	0	0	0	0	0	0	0	0	0	0
A0A669ECZ3	YqaJ viral recombinase domain-containing protein		Oreochromis niloticus (Nile tilapia) (Tilapia nilotica)	DNA repair [GO:0006281]	membrane [GO:0016020]		0.999	-1.0518	LTASRFR	0	0	0	0	0	0	0	0	0	0	0	0	0	0	0	0	0	0	0	0	0	0	0	0	0	0	0	0	0	0	0	0	0	0	0	0	0	0	0	0
A0A669EDC6	GRAM domain containing 4a		Oreochromis niloticus (Nile tilapia) (Tilapia nilotica)	apoptotic process [GO:0006915]	membrane [GO:0016020]		1.0114	-0.25733	MKLCYDLR	0	0	0	0	0	0	0	0	363.09	0	0	0	0	0	0	0	0	0	0	0	0	0	0	0	0	0	0	0	0	0	0	0	0	0	0	0	0	0	0	0
A0A669EDH5	Ventral anterior homeobox 1		Oreochromis niloticus (Nile tilapia) (Tilapia nilotica)		nucleus [GO:0005634]	DNA binding [GO:0003677]; DNA-binding transcription factor activity, RNA polymerase II-specific [GO:0000981]	0.99867	-1.0518	NGLKEGK	0	0	0	0	1497.4	0	0	0	0	0	0	0	0	0	0	0	0	0	0	0	0	0	0	0	0	3844.5	0	0	0	0	0	0	0	0	0	0	0	0	0	0
A0A669EDI8	Coiled-coil domain containing 142	ccdc142	Oreochromis niloticus (Nile tilapia) (Tilapia nilotica)				0.998	-0.83636	FSTLDSSLPR	0	0	0	0	0	0	0	0	0	0	0	0	0	0	0	0	0	0	0	0	0	0	0	0	0	0	0	0	0	0	0	0	0	0	0	0	0	0	0	0
A0A669EDL0	RING-type E3 ubiquitin transferase (EC 2.3.2.27)	maea	Oreochromis niloticus (Nile tilapia) (Tilapia nilotica)	proteasome-mediated ubiquitin-dependent protein catabolic process [GO:0043161]		ubiquitin protein ligase activity [GO:0061630]	0.98439	-0.38622	VPYETLNKR	0	0	0	0	0	0	0	0	0	0	0	0	0	0	0	0	0	0	0	0	0	0	0	0	0	0	0	0	0	0	0	0	0	0	0	0	0	0	0	0
A0A669EDQ7	Angiomotin like 2	amotl2	Oreochromis niloticus (Nile tilapia) (Tilapia nilotica)		cytoplasm [GO:0005737]		0.99578	-2.9194	LIQEQLR	0	0	0	0	0	0	0	0	0	0	0	0	0	0	0	0	0	0	0	0	0	0	0	0	0	0	0	1816.2	0	0	0	0	0	0	0	0	0	0	0	0
A0A669EDZ3	SEL1L adaptor subunit of ERAD E3 ubiquitin ligase	sel1l	Oreochromis niloticus (Nile tilapia) (Tilapia nilotica)				0.99541	-0.1375	KELYEKLLK	1116.7	0	0	0	1271.5	0	0	0	0	0	0	911.71	0	0	0	0	0	0	0	1325.1	1380.7	0	0	476	976.7	0	0	0	899.79	0	0	0	0	0	0	0	0	0	0	1360
A0A669EE65	Huntingtin	htt	Oreochromis niloticus (Nile tilapia) (Tilapia nilotica)		cytoplasm [GO:0005737]; nucleus [GO:0005634]		1.0102	-1.1578	ALMDSNLPR	0	0	0	0	0	0	0	0	0	0	0	0	0	0	0	0	0	0	0	0	0	957.73	0	0	0	0	0	0	0	0	0	0	0	0	0	0	0	0	0	0
A0A669EEA2	Transient receptor potential cation channel, subfamily M, member 1a		Oreochromis niloticus (Nile tilapia) (Tilapia nilotica)	monoatomic cation transmembrane transport [GO:0098655]; protein tetramerization [GO:0051262]	membrane [GO:0016020]	monoatomic ion channel activity [GO:0005216]	1.0046	-0.91394	VGGADDEPRPK	0	0	0	0	0	0	0	0	0	0	0	0	0	0	0	0	0	0	0	0	0	0	0	0	0	0	0	0	0	0	0	0	0	0	0	0	0	0	0	0
A0A669EED6	Si:ch211-107m4.1		Oreochromis niloticus (Nile tilapia) (Tilapia nilotica)		nucleus [GO:0005634]		0.99344	-0.33863	GKKVSDR	0	0	0	0	0	0	0	0	0	0	0	0	0	0	0	679.57	0	0	0	0	0	0	0	0	1192.5	0	0	0	0	0	0	0	0	0	0	0	0	0	0	0
A0A669EEE6	Peptidase (mitochondrial processing) alpha		Oreochromis niloticus (Nile tilapia) (Tilapia nilotica)			metal ion binding [GO:0046872]	1.007	-0.9014	KNLHFLK	0	0	0	0	0	0	0	0	0	0	0	0	0	0	0	0	0	0	0	0	0	0	0	0	0	8723.4	0	0	0	0	0	0	0	0	0	0	0	0	0	0
A0A669EEI3	Immunoglobulin mu DNA binding protein 2	ighmbp2	Oreochromis niloticus (Nile tilapia) (Tilapia nilotica)			ATP binding [GO:0005524]; DNA binding [GO:0003677]; helicase activity [GO:0004386]; zinc ion binding [GO:0008270]	1.0122	-1.1741	TGELETR	0	0	0	0	0	0	0	0	0	0	0	0	0	0	0	0	0	0	0	0	0	0	0	0	0	0	0	0	0	0	0	0	0	0	0	0	0	0	0	0
A0A669EEM9	S1 RNA binding domain 1	SRBD1	Oreochromis niloticus (Nile tilapia) (Tilapia nilotica)	nucleobase-containing compound metabolic process [GO:0006139]		nucleic acid binding [GO:0003676]	0.99726	-1.0414	LPVSQRR	0	0	0	0	0	0	0	0	0	0	3409.5	0	0	0	0	0	0	0	0	0	0	0	0	0	0	0	0	0	0	0	0	0	0	3982.8	0	0	0	0	0	0
A0A669EET7	SCY1 like pseudokinase 3	scyl3	Oreochromis niloticus (Nile tilapia) (Tilapia nilotica)	protein phosphorylation [GO:0006468]		ATP binding [GO:0005524]; protein kinase activity [GO:0004672]	1.0118	-1.1524	GGAASPSSK	0	0	0	0	0	1753.9	0	0	0	0	0	0	0	0	0	0	0	0	0	0	0	0	0	0	0	0	0	0	0	0	0	0	0	2058.7	0	0	0	0	0	0
A0A669EEV0	Microtubule-associated protein 1S	LOC100702708	Oreochromis niloticus (Nile tilapia) (Tilapia nilotica)	microtubule cytoskeleton organization [GO:0000226]	microtubule [GO:0005874]	microtubule binding [GO:0008017]	0.99175	-0.31697	IKETGIKDK	0	0	0	0	0	0	0	0	2298.5	0	0	0	1765.6	0	0	0	2062.8	0	0	0	0	0	0	0	0	0	0	0	0	0	2075.6	0	0	0	0	0	0	0	0	0
A0A669EF23	Protein prune homolog 2	LOC100697171	Oreochromis niloticus (Nile tilapia) (Tilapia nilotica)		membrane [GO:0016020]		1.0026	-0.91841	SFIILHPSWFIR	0	0	0	0	0	0	0	0	0	0	0	0	0	0	0	0	0	0	0	770.03	0	0	0	0	0	0	0	0	0	0	0	0	0	0	0	0	0	0	0	0
A0A669EF53	Ig-like domain-containing protein		Oreochromis niloticus (Nile tilapia) (Tilapia nilotica)		membrane [GO:0016020]		1.0129	-0.20905	FSGTKPLKVRWLK	0	0	0	0	0	0	0	0	0	0	0	0	0	0	0	0	0	0	0	0	0	0	0	0	0	0	405.43	0	0	0	0	0	0	0	0	0	0	0	0	0
A0A669EFC3	Uncharacterized protein		Oreochromis niloticus (Nile tilapia) (Tilapia nilotica)				0.99821	-3.1285	ELRTVKQQLALIR	0	0	0	0	0	0	0	0	0	0	0	0	0	0	0	0	0	0	0	0	0	0	0	0	0	0	0	0	0	0	0	0	0	0	0	0	0	0	0	0
A0A669EFG4	AF4/FMR2 family member 4	aff4	Oreochromis niloticus (Nile tilapia) (Tilapia nilotica)	regulation of gene expression [GO:0010468]	nucleus [GO:0005634]		0.99845	-1.7831	CGGSSQSSK	0	0	0	0	0	0	0	0	0	0	0	0	0	0	0	0	0	0	0	0	0	0	0	0	0	0	0	0	0	0	0	0	0	0	0	0	0	0	0	0
A0A669EFI2	Phosphomannomutase (EC 5.4.2.8)	pmm1	Oreochromis niloticus (Nile tilapia) (Tilapia nilotica)	GDP-mannose biosynthetic process [GO:0009298]	cytoplasm [GO:0005737]	phosphomannomutase activity [GO:0004615]	1.0027	-1.4662	LCLEVLER	0	0	0	0	0	0	0	0	0	0	0	0	0	0	0	0	0	0	0	0	0	0	0	0	0	0	0	0	0	0	0	0	0	0	0	0	0	0	0	0
A0A669EFL8	Kinesin family member 14	kif14	Oreochromis niloticus (Nile tilapia) (Tilapia nilotica)	microtubule-based movement [GO:0007018]; system development [GO:0048731]		ATP binding [GO:0005524]; microtubule binding [GO:0008017]; microtubule motor activity [GO:0003777]	0.99689	-6.9826	FAQNKTSSSSSSSSRNTDETQTFK	1021.2	0	0	0	0	0	0	512.25	0	0	0	0	0	0	0	762.67	0	0	0	0	0	384.87	0	0	0	0	0	0	446.34	0	0	0	0	0	0	0	0	0	0	1466.7
A0A669EFS3	Mitogen-activated protein kinase kinase kinase 19		Oreochromis niloticus (Nile tilapia) (Tilapia nilotica)	protein phosphorylation [GO:0006468]	cytoplasm [GO:0005737]	ATP binding [GO:0005524]; protein kinase activity [GO:0004672]	0.99628	-4.344	TPKLLAPLDNR	0	993.57	0	0	0	969.02	0	1866.1	1304.9	0	0	0	669.18	616.73	0	0	670.87	0	0	0	741.36	0	0	0	0	0	0	0	0	0	696.24	0	0	0	0	0	992.21	0	981.56	0
A0A669EFT3	DnaJ heat shock protein family (Hsp40) member C8	dnajc8	Oreochromis niloticus (Nile tilapia) (Tilapia nilotica)				0.98059	-0.39719	KRALDVIHAGK	0	0	0	0	0	0	0	0	0	0	0	0	0	0	0	0	0	0	0	0	0	0	0	0	0	0	0	0	0	0	0	0	763.7	0	0	0	0	0	0	0
A0A669EFV6	Xylulokinase	xylb	Oreochromis niloticus (Nile tilapia) (Tilapia nilotica)	carbohydrate metabolic process [GO:0005975]		kinase activity [GO:0016301]	0.99967	-1.0518	INKTCGL	0	0	0	0	0	0	0	0	0	0	0	0	0	0	0	0	0	0	0	0	0	0	0	0	0	0	0	0	0	0	0	0	0	0	0	0	0	0	0	0
A0A669EG05	Epithelial cell transforming 2	ect2	Oreochromis niloticus (Nile tilapia) (Tilapia nilotica)	intracellular signal transduction [GO:0035556]; positive regulation of GTPase activity [GO:0043547]; regulation of cytokinesis, actomyosin contractile ring assembly [GO:2000431]	cytoplasm [GO:0005737]; nucleus [GO:0005634]	GTPase activator activity [GO:0005096]; guanyl-nucleotide exchange factor activity [GO:0005085]	1.0023	-2.014	ALAEGSKPSK	0	0	0	0	0	0	0	0	0	0	0	0	0	0	0	584.1	0	0	0	1019.5	0	0	0	0	0	0	479.34	0	0	0	0	0	0	0	0	0	0	0	0	737.45
A0A669EG21	Heterogeneous nuclear ribonucleoprotein L like	HNRNPLL	Oreochromis niloticus (Nile tilapia) (Tilapia nilotica)	mRNA processing [GO:0006397]	nucleus [GO:0005634]	RNA binding [GO:0003723]	0.99374	-0.7664	LCFSTSSHL	0	0	0	0	0	0	0	0	0	0	1253.4	0	0	0	0	0	0	0	0	0	0	0	0	0	0	0	1075	0	0	0	0	0	0	0	0	0	0	0	0	0
A0A669EG22	Dual specificity phosphatase 22b		Oreochromis niloticus (Nile tilapia) (Tilapia nilotica)	protein dephosphorylation [GO:0006470]		protein tyrosine/serine/threonine phosphatase activity [GO:0008138]	1.0027	-1.4662	LTSLLFYM	0	0	0	0	0	0	0	0	0	0	0	0	0	0	0	0	0	0	0	0	0	0	0	0	0	0	0	0	0	0	0	0	0	0	0	0	0	0	0	0
A0A669EG29	Phospholipase (EC 3.1.4.4)		Oreochromis niloticus (Nile tilapia) (Tilapia nilotica)	inositol lipid-mediated signaling [GO:0048017]; lipid catabolic process [GO:0016042]; phosphatidic acid biosynthetic process [GO:0006654]	cytoplasm [GO:0005737]; endomembrane system [GO:0012505]; intracellular membrane-bounded organelle [GO:0043231]	N-acylphosphatidylethanolamine-specific phospholipase D activity [GO:0070290]; phosphatidylinositol binding [GO:0035091]; phospholipase D activity [GO:0004630]	0.99402	-0.33863	RTRMSIR	0	0	0	0	0	0	0	0	0	0	0	0	0	0	0	0	0	0	0	0	0	0	0	0	0	0	0	0	0	0	0	0	0	0	0	0	0	0	1354	0
A0A669EG48	Leucine, glutamate and lysine rich 1	lekr1	Oreochromis niloticus (Nile tilapia) (Tilapia nilotica)				1.0075	-1.2286	LEKSEMKLR	0	0	0	827.42	0	0	0	0	0	0	0	0	0	0	0	0	0	0	0	0	0	0	0	0	0	0	0	0	0	0	0	0	0	0	0	0	0	0	0	0
A0A669EG83	1-phosphatidylinositol-3-phosphate 5-kinase (EC 2.7.1.150)	pikfyve	Oreochromis niloticus (Nile tilapia) (Tilapia nilotica)	intracellular signal transduction [GO:0035556]		1-phosphatidylinositol-3-phosphate 5-kinase activity [GO:0000285]; ATP binding [GO:0005524]; metal ion binding [GO:0046872]	1.0038	-1.6236	DLKELDVR	0	0	0	0	0	0	0	0	0	0	0	0	0	0	0	0	0	0	0	0	0	0	0	0	0	0	0	0	0	893.85	0	0	0	0	0	0	0	0	0	0
A0A669EG98	SWI/SNF related, matrix associated, actin dependent regulator of chromatin, subfamily a, member 4	SMARCA4	Oreochromis niloticus (Nile tilapia) (Tilapia nilotica)	regulation of DNA-templated transcription [GO:0006355]	nucleus [GO:0005634]	ATP binding [GO:0005524]; ATP-dependent chromatin remodeler activity [GO:0140658]; histone binding [GO:0042393]; hydrolase activity [GO:0016787]	0.99823	-1.7928	NPRRKPR	0	0	0	0	0	0	0	0	0	0	0	0	0	0	0	0	0	0	0	0	612.54	0	0	0	0	1050.6	0	0	0	0	0	0	0	0	0	0	0	0	0	0
A0A669EGG0	Keratin, type I cytoskeletal 18	LOC100707177	Oreochromis niloticus (Nile tilapia) (Tilapia nilotica)		intermediate filament [GO:0005882]	structural molecule activity [GO:0005198]	1.0068	-1.5672	ASSISMK	0	0	0	0	0	0	504.63	0	463.91	0	0	0	0	0	0	0	0	0	0	0	0	0	0	0	0	0	0	0	0	0	0	0	0	0	0	0	0	0	1589.4	0
A0A669EGH3	Integrase catalytic domain-containing protein		Oreochromis niloticus (Nile tilapia) (Tilapia nilotica)	DNA integration [GO:0015074]		nucleic acid binding [GO:0003676]	1.0023	-1.0546	VIDLTGVLPRSR	638.33	0	677.57	0	0	0	0	0	812.85	0	0	0	0	0	0	0	0	0	522.8	0	0	0	0	0	0	0	0	0	0	0	0	0	0	0	0	0	0	0	0	0
A0A669EGN2	Potassium intermediate/small conductance calcium-activated channel, subfamily N, member 3		Oreochromis niloticus (Nile tilapia) (Tilapia nilotica)		membrane [GO:0016020]	calmodulin binding [GO:0005516]; small conductance calcium-activated potassium channel activity [GO:0016286]	0.99589	-0.83338	EGAGGVGAVGTGAR	0	0	0	0	0	0	0	0	0	0	0	0	0	0	0	0	0	0	0	0	0	0	0	0	0	0	0	0	0	0	0	0	0	0	0	0	0	0	0	0
A0A669EGP3	Mitochondrial ribosomal protein L45	mrpl45	Oreochromis niloticus (Nile tilapia) (Tilapia nilotica)				1.0033	-0.97329	LSTLSKEGLK	0	0	0	0	0	1908.5	0	0	1627.3	0	0	0	1511.5	1371	0	0	1480.9	0	0	0	0	0	0	0	0	0	0	0	0	0	1715.7	0	0	0	0	0	0	1418.5	0	0
A0A669EGR9	C3H1-type domain-containing protein		Oreochromis niloticus (Nile tilapia) (Tilapia nilotica)			metal ion binding [GO:0046872]	1.0059	-0.95799	LESTVNNLR	0	0	0	0	0	0	0	0	0	0	0	0	0	0	0	0	0	0	0	0	0	0	0	0	0	0	0	0	0	0	0	0	0	0	0	0	0	0	0	0
A0A669EGV1	Nicotinamide-nucleotide adenylyltransferase (EC 2.7.7.1) (EC 2.7.7.18)		Oreochromis niloticus (Nile tilapia) (Tilapia nilotica)	NAD biosynthetic process [GO:0009435]		ATP binding [GO:0005524]; nicotinamide-nucleotide adenylyltransferase activity [GO:0000309]; nicotinate-nucleotide adenylyltransferase activity [GO:0004515]	0.99425	-0.83262	NETSATEVR	0	0	0	0	0	0	0	0	0	0	0	0	0	0	0	0	0	0	0	0	0	0	418.94	0	0	0	0	0	0	0	0	0	0	0	0	0	0	0	0	0
A0A669EGZ0	Nucleobindin-2	LOC100696340	Oreochromis niloticus (Nile tilapia) (Tilapia nilotica)		Golgi apparatus [GO:0005794]	calcium ion binding [GO:0005509]	1.0026	-0.91841	STLTVDHQALLK	0	0	0	0	0	0	0	0	0	0	0	0	0	0	0	0	0	0	0	0	0	0	0	0	0	0	0	0	0	0	0	0	0	0	0	0	0	0	0	0
A0A669EH05	IRG-type G domain-containing protein		Oreochromis niloticus (Nile tilapia) (Tilapia nilotica)		membrane [GO:0016020]	GTP binding [GO:0005525]	0.99381	-0.33732	IINKITVFQSRIK	0	0	0	0	0	0	0	0	0	0	0	0	0	0	0	0	0	0	0	0	0	0	0	0	0	0	0	0	0	0	0	0	0	0	0	0	0	0	0	0
A0A669EH39	Cytochrome c oxidase assembly factor 3		Oreochromis niloticus (Nile tilapia) (Tilapia nilotica)	mitochondrial cytochrome c oxidase assembly [GO:0033617]	mitochondrial inner membrane [GO:0005743]		0.99514	-0.33863	KNAARIR	395.93	0	0	0	0	0	0	0	0	0	0	0	0	0	0	0	0	0	0	0	0	0	0	0	0	0	0	0	0	0	0	0	0	0	0	0	0	0	0	0
A0A669EH56	Receptor-type tyrosine-protein phosphatase zeta	LOC100711602	Oreochromis niloticus (Nile tilapia) (Tilapia nilotica)	protein dephosphorylation [GO:0006470]	membrane [GO:0016020]	protein tyrosine phosphatase activity [GO:0004725]	0.99647	-4.1583	VITAPDTAISGNMAFPVK	0	0	0	0	0	0	0	0	0	0	0	0	0	0	0	0	0	0	0	0	0	0	0	0	0	0	0	0	0	0	0	0	0	0	0	0	0	0	0	0
A0A669EH59	Uncharacterized protein		Oreochromis niloticus (Nile tilapia) (Tilapia nilotica)				0.99147	-0.6349	LIARALEQEANAVK	0	0	0	0	0	0	0	0	0	0	0	0	0	0	0	0	0	0	0	0	0	933.74	0	879.39	0	0	0	0	0	0	0	0	0	0	0	0	0	0	0	0
A0A669EHA1	Bromodomain containing 1	brd1	Oreochromis niloticus (Nile tilapia) (Tilapia nilotica)		nucleus [GO:0005634]	metal ion binding [GO:0046872]	1.0044	-0.97329	SKMVPLGIDK	0	0	0	0	0	0	0	0	0	0	0	0	0	0	0	0	0	0	0	0	0	0	0	0	0	0	0	0	0	0	0	0	0	0	0	0	0	0	0	0
A0A669EHB2	G-protein coupled receptors family 3 profile domain-containing protein		Oreochromis niloticus (Nile tilapia) (Tilapia nilotica)		plasma membrane [GO:0005886]	G protein-coupled receptor activity [GO:0004930]	0.99646	-3.8311	DTFLEVVEIIK	0	0	0	0	0	0	0	0	0	0	0	0	0	0	0	0	0	0	0	0	0	0	0	0	0	0	0	0	0	0	0	0	0	0	0	0	0	0	0	884.31
A0A669EHE6	Protocadherin-11 X-linked	LOC100697944	Oreochromis niloticus (Nile tilapia) (Tilapia nilotica)	homophilic cell adhesion via plasma membrane adhesion molecules [GO:0007156]	plasma membrane [GO:0005886]	calcium ion binding [GO:0005509]	0.98545	-0.61839	LDREKQER	0	0	0	0	0	0	0	0	0	0	0	0	0	0	0	0	0	0	0	0	0	0	0	862.7	0	0	0	0	0	0	0	0	507.8	0	0	0	0	0	0	0
A0A669EHE9	Centrosomal protein 126	cep126	Oreochromis niloticus (Nile tilapia) (Tilapia nilotica)	cytoplasmic microtubule organization [GO:0031122]; mitotic spindle organization [GO:0007052]; non-motile cilium assembly [GO:1905515]	centrosome [GO:0005813]; ciliary base [GO:0097546]		0.9812	-0.39719	APALERGRVLR	0	0	0	0	950.82	0	0	0	0	0	0	0	0	0	0	0	0	0	0	0	0	0	0	0	0	0	0	0	0	0	0	0	0	0	0	0	0	0	0	0
A0A669EHF3	Regulating synaptic membrane exocytosis 1	RIMS1	Oreochromis niloticus (Nile tilapia) (Tilapia nilotica)	exocytosis [GO:0006887]	membrane [GO:0016020]; synapse [GO:0045202]	metal ion binding [GO:0046872]; small GTPase binding [GO:0031267]	0.998	-1.7459	ITLSKRSAMPR	0	0	0	0	814.33	0	0	0	0	0	0	0	0	0	0	0	0	0	0	0	0	0	0	0	0	0	0	0	0	0	787.43	0	0	0	0	0	0	0	0	0
A0A669EHJ9	Ecotropic viral integration site 5 like	EVI5L	Oreochromis niloticus (Nile tilapia) (Tilapia nilotica)				0	0.4435	RALSHIQVSHLSEMLGANKK	0	3737.2	0	476.49	0	0	8575.2	0	0	0	0	0	0	0	0	0	0	0	0	0	0	0	2972	0	4623.5	0	0	0	0	0	0	0	0	0	2071.2	0	0	0	0	0
A0A669EHK3	Uncharacterized protein		Oreochromis niloticus (Nile tilapia) (Tilapia nilotica)				0.99832	-1.0518	SQKTTER	0	0	0	0	0	0	1012.5	0	0	0	611.42	0	0	0	0	0	0	0	0	0	0	0	0	0	0	0	0	0	0	0	0	0	0	0	0	0	0	0	0	0
A0A669EHL8	Trafficking kinesin protein 1	trak1	Oreochromis niloticus (Nile tilapia) (Tilapia nilotica)		early endosome [GO:0005769]; mitochondrion [GO:0005739]		1.0105	-1.1551	DLEEENKSLR	0	0	0	0	0	0	0	0	0	1005.1	0	0	0	0	0	0	0	0	0	0	0	0	0	0	0	0	0	0	0	0	0	0	0	0	0	0	0	0	0	0
A0A669EHT4	Rab11 family-interacting protein 5	sfxn5	Oreochromis niloticus (Nile tilapia) (Tilapia nilotica)	protein transport [GO:0015031]	endosome [GO:0005768]; membrane [GO:0016020]	small GTPase binding [GO:0031267]	1.0023	-1.0795	SGPMLGEKEER	1661.1	1655.1	1543.3	1140.6	1099.4	0	0	0	0	0	1017.4	0	0	0	0	879.42	893.46	902.87	789.8	781.89	0	1008.9	973.4	904.78	558.38	564.07	592.14	1484.2	1440.8	1540.2	0	0	758.61	0	0	0	1085.7	1111.1	0	743.02
A0A669EHZ3	Tripartite motif-containing protein 46	LOC100708191	Oreochromis niloticus (Nile tilapia) (Tilapia nilotica)		cellular anatomical entity [GO:0110165]	zinc ion binding [GO:0008270]	1.011	-1.1741	VSNLNNG	0	0	0	0	0	0	0	0	0	0	0	0	0	0	0	0	0	0	0	0	0	0	0	0	0	0	0	0	0	0	0	0	0	0	0	0	0	0	0	0
A0A669EI90	Cartilage oligomeric matrix protein	comp	Oreochromis niloticus (Nile tilapia) (Tilapia nilotica)	cell adhesion [GO:0007155]	extracellular region [GO:0005576]	calcium ion binding [GO:0005509]	1.0129	-0.24283	LLWKDARNVGWK	0	0	0	0	0	0	0	0	0	0	0	0	0	0	0	0	0	0	0	0	0	966.57	754.28	0	0	0	0	0	0	0	0	0	0	0	0	0	0	0	0	0
A0A669EI98	Contactin 5	cntn5	Oreochromis niloticus (Nile tilapia) (Tilapia nilotica)		membrane [GO:0016020]		0.9986	-1.0079	ASPKPRITWK	0	0	0	0	0	0	0	0	0	0	0	0	0	0	0	0	0	0	0	0	601.91	0	0	0	0	0	0	0	0	0	0	0	0	0	0	0	0	0	0	0
A0A669EIA8	Spindle assembly abnormal protein 6 homolog		Oreochromis niloticus (Nile tilapia) (Tilapia nilotica)	cell cycle [GO:0007049]	cytoplasm [GO:0005737]; microtubule organizing center [GO:0005815]		0.98545	-0.62118	AEKHVLEMKLK	0	0	0	0	0	0	0	0	0	0	0	0	0	0	0	0	0	0	509.87	475.27	568.49	0	0	0	0	0	0	0	0	0	0	0	0	0	0	0	0	0	0	0
A0A669EID6	Zinc finger protein 638	LOC102081126	Oreochromis niloticus (Nile tilapia) (Tilapia nilotica)		nucleus [GO:0005634]	nucleic acid binding [GO:0003676]; zinc ion binding [GO:0008270]	1.0007	-1.6958	RSSHSCSR	0	0	0	0	0	0	0	0	0	0	0	0	0	0	0	0	0	0	0	0	0	0	0	0	0	0	0	0	0	0	0	0	0	0	0	0	0	0	0	3167.4
A0A669EIH8	Uncharacterized LOC100710086	LOC100710086	Oreochromis niloticus (Nile tilapia) (Tilapia nilotica)		nucleus [GO:0005634]	nucleic acid binding [GO:0003676]; zinc ion binding [GO:0008270]	0.99901	-3.4366	GNDEKTLLEESSK	0	0	0	0	0	0	0	0	0	0	0	0	0	0	0	0	0	0	0	0	1781.8	0	0	0	0	0	0	0	0	0	0	0	0	0	0	0	0	0	0	0
A0A669EII5	Death associated protein kinase 2	dapk2	Oreochromis niloticus (Nile tilapia) (Tilapia nilotica)	protein phosphorylation [GO:0006468]	cytoplasm [GO:0005737]	ATP binding [GO:0005524]; protein serine/threonine kinase activity [GO:0004674]	0.98885	-0.11593	GVKKEEIAR	0	0	1200	0	0	0	0	3543.8	0	0	0	0	0	0	0	0	0	0	0	0	0	0	0	0	0	452.81	0	0	0	0	0	0	0	0	0	0	0	0	0	0
A0A669EIJ4	Protein kinase domain-containing protein		Oreochromis niloticus (Nile tilapia) (Tilapia nilotica)	protein phosphorylation [GO:0006468]	cytoplasm [GO:0005737]	ATP binding [GO:0005524]; protein kinase activity [GO:0004672]	0.99646	-1.841	GPFGRSPHGR	0	0	0	0	0	0	0	0	0	0	0	0	0	812.46	0	0	0	0	0	0	0	0	0	0	0	0	0	0	0	0	0	0	0	0	0	0	0	0	0	0
A0A669EIK9	Peptidase M12B domain-containing protein		Oreochromis niloticus (Nile tilapia) (Tilapia nilotica)	extracellular matrix organization [GO:0030198]; proteolysis [GO:0006508]	extracellular region [GO:0005576]	metal ion binding [GO:0046872]; metalloendopeptidase activity [GO:0004222]	1.0045	-1.3472	LTPCSSKCR	0	0	989.22	0	0	0	0	0	0	0	0	0	0	0	0	0	0	0	0	0	0	0	0	0	0	0	0	0	0	0	0	0	0	0	0	0	0	0	0	0
A0A669EIR1	ribonuclease H (EC 3.1.26.4)		Oreochromis niloticus (Nile tilapia) (Tilapia nilotica)	DNA integration [GO:0015074]		nucleic acid binding [GO:0003676]	0.98329	-0.74001	RITTANITK	0	0	0	0	0	0	0	0	0	0	0	0	0	0	0	0	0	0	0	0	0	0	0	0	0	0	0	0	0	0	0	0	0	0	0	0	0	0	0	0
A0A669EJ24	Serine/threonine-protein kinase tousled-like 2	LOC100711184	Oreochromis niloticus (Nile tilapia) (Tilapia nilotica)	protein phosphorylation [GO:0006468]	cytoplasm [GO:0005737]	ATP binding [GO:0005524]; protein kinase activity [GO:0004672]	1	-1.0518	LLIEKSK	0	402.79	0	0	0	0	0	0	0	0	0	0	0	0	0	0	0	0	0	0	418.26	0	0	0	0	0	0	0	0	0	0	0	0	0	0	0	0	0	0	0
A0A669EJ25	TSR1 ribosome maturation factor	tsr1	Oreochromis niloticus (Nile tilapia) (Tilapia nilotica)	ribosome biogenesis [GO:0042254]	nucleolus [GO:0005730]		0.99445	-0.63073	WGRRGHIK	0	0	0	0	0	0	0	0	0	0	0	0	0	0	0	0	0	0	0	0	0	0	0	0	925.95	0	0	0	0	0	0	0	0	0	0	0	0	0	0	0
A0A669EJ70	Ligand dependent nuclear receptor corepressor like	lcorl	Oreochromis niloticus (Nile tilapia) (Tilapia nilotica)				1.0075	-1.5491	GSPSSETTEVER	0	0	0	0	0	0	0	0	0	0	0	0	0	0	0	0	0	0	0	0	0	2052.4	0	0	0	8565.1	0	0	2420.2	0	0	0	0	0	0	3582	0	0	0	0
A0A669EJ76	Synaptotagmin-like protein 2	LOC100701038	Oreochromis niloticus (Nile tilapia) (Tilapia nilotica)	intracellular protein transport [GO:0006886]		small GTPase binding [GO:0031267]	0.99861	-3.3078	EVIESQEEVK	0	789.38	0	0	0	1060.6	0	896	0	0	0	0	0	790.02	0	0	0	0	1040.3	0	0	0	0	0	0	0	0	0	0	0	779.22	0	0	0	0	0	440.3	0	621.09	0
A0A669EJ80	Serine/threonine-protein kinase MAK	MAK	Oreochromis niloticus (Nile tilapia) (Tilapia nilotica)	protein phosphorylation [GO:0006468]	cytoplasm [GO:0005737]	ATP binding [GO:0005524]; protein kinase activity [GO:0004672]	0.97248	-0.067582	KPTITSLRNSCR	0	0	0	0	0	0	0	468.29	539.18	0	0	0	0	0	0	0	0	0	0	0	0	0	0	0	0	0	0	0	0	0	0	0	0	0	0	0	0	0	0	0
A0A669EJD1	Ninein	nin	Oreochromis niloticus (Nile tilapia) (Tilapia nilotica)		membrane [GO:0016020]	calcium ion binding [GO:0005509]	1.0073	-1.2033	DLYVENAQLLK	0	0	0	0	0	0	0	0	0	0	0	0	0	0	0	0	0	0	0	0	0	0	0	0	0	0	0	0	0	0	0	0	0	0	0	0	0	0	0	0
A0A669EJK1	Myosin XVIIIAb		Oreochromis niloticus (Nile tilapia) (Tilapia nilotica)	system development [GO:0048731]	myosin complex [GO:0016459]	actin binding [GO:0003779]; ATP binding [GO:0005524]; cytoskeletal motor activity [GO:0003774]	1.0088	-1.3184	TTMLDRSPDGGVYR	0	0	0	0	0	0	0	0	0	0	0	0	0	0	0	0	0	0	0	0	0	0	0	0	0	0	0	0	0	0	0	0	0	0	0	0	0	0	0	0
A0A669EJV1	Abnormal spindle microtubule assembly	aspm	Oreochromis niloticus (Nile tilapia) (Tilapia nilotica)		cytoplasm [GO:0005737]; nucleus [GO:0005634]		0.9963	-5.8618	AAVLIQQK	0	1294.5	0	0	816.48	1206.7	0	0	0	0	0	79784	0	0	0	0	0	0	0	0	0	0	561.61	0	0	0	0	0	0	0	0	0	0	0	0	0	0	0	0	0
A0A669EJZ9	Myelin basic protein	LOC106096431	Oreochromis niloticus (Nile tilapia) (Tilapia nilotica)		myelin sheath [GO:0043209]	structural constituent of myelin sheath [GO:0019911]	0.99495	-0.63073	SQSAKGKK	1263	0	0	0	0	0	0	0	0	0	0	0	0	0	0	0	0	0	0	0	0	0	0	0	0	0	0	0	0	0	0	0	0	0	0	0	0	0	0	0
A0A669EK00	Conserved oligomeric Golgi complex subunit 6 (COG complex subunit 6) (Component of oligomeric Golgi complex 6)	cog6	Oreochromis niloticus (Nile tilapia) (Tilapia nilotica)	intra-Golgi vesicle-mediated transport [GO:0006891]; protein transport [GO:0015031]	Golgi membrane [GO:0000139]; Golgi transport complex [GO:0017119]		0	0.27116	LDNDKEMLEALK	0	0	0	0	0	0	0	0	0	0	0	0	0	0	0	0	0	0	0	0	0	634.6	521.72	416.53	0	0	0	0	0	0	0	0	0	0	0	0	0	0	0	0
A0A669EK83	receptor protein serine/threonine kinase (EC 2.7.11.30)		Oreochromis niloticus (Nile tilapia) (Tilapia nilotica)	protein phosphorylation [GO:0006468]	membrane [GO:0016020]	ATP binding [GO:0005524]; transmembrane receptor protein serine/threonine kinase activity [GO:0004675]	1.0048	-1.3439	LDPKEVDK	0	0	0	0	0	0	0	0	0	0	0	0	0	0	0	0	0	0	0	0	0	0	0	0	0	0	0	0	0	0	977.55	0	0	0	0	0	0	0	0	0
A0A669EKJ2	GLI family zinc finger 3	gli3	Oreochromis niloticus (Nile tilapia) (Tilapia nilotica)	regulation of transcription by RNA polymerase II [GO:0006357]	nucleus [GO:0005634]	RNA polymerase II transcription regulatory region sequence-specific DNA binding [GO:0000977]	1.0054	-1.0956	ASAVPNMLGK	0	0	0	0	0	0	0	0	0	0	0	0	0	0	0	0	0	0	0	0	0	0	0	0	0	0	0	0	0	0	0	0	0	0	0	0	0	0	0	0
A0A669EKJ4	Ryanodine receptor 3	RYR3	Oreochromis niloticus (Nile tilapia) (Tilapia nilotica)	intracellular calcium ion homeostasis [GO:0006874]	sarcoplasmic reticulum membrane [GO:0033017]	calmodulin binding [GO:0005516]; ryanodine-sensitive calcium-release channel activity [GO:0005219]	0.99938	-2.2527	EAQQPMEGLLEK	0	0	0	0	0	0	0	0	0	0	0	0	0	0	0	0	0	0	0	0	0	0	1142.3	1186.7	0	0	0	0	0	0	0	0	0	0	0	0	0	0	0	0
A0A669EKK4	Dedicator of cytokinesis protein 7	LOC100691522	Oreochromis niloticus (Nile tilapia) (Tilapia nilotica)	small GTPase mediated signal transduction [GO:0007264]	cellular anatomical entity [GO:0110165]	guanyl-nucleotide exchange factor activity [GO:0005085]	0.99651	-7.4406	GFVFNLIR	0	0	0	0	0	0	0	0	0	0	0	0	0	0	0	0	0	0	0	0	0	0	0	0	0	0	0	0	0	0	0	0	0	0	0	0	0	0	0	0
A0A669EKQ5	Inhibitor of Bruton agammaglobulinemia tyrosine kinase		Oreochromis niloticus (Nile tilapia) (Tilapia nilotica)				0.98491	-0.37829	GEEKGKSQEDR	0	0	0	0	0	0	0	0	0	0	0	0	0	0	0	0	0	0	0	0	0	0	0	0	0	0	0	0	0	0	0	0	0	0	0	0	0	0	0	0
A0A669EKR3	SRC kinase signaling inhibitor 1	SRCIN1	Oreochromis niloticus (Nile tilapia) (Tilapia nilotica)		cellular anatomical entity [GO:0110165]		0.9998	-2.5137	ALSMEVR	0	0	0	0	0	0	0	0	0	0	0	0	0	0	0	0	0	0	0	0	0	0	0	0	0	0	0	0	764.05	0	0	0	0	0	0	0	0	0	0	0
A0A669EKU9	Fumarylacetoacetate hydrolase domain containing 2A	FAHD2A	Oreochromis niloticus (Nile tilapia) (Tilapia nilotica)			catalytic activity [GO:0003824]	0.96703	0.08149	VVCVGMNYR	0	0	0	0	0	0	389.7	0	0	0	0	0	0	0	0	0	0	0	0	0	0	0	0	0	0	0	0	0	0	0	0	0	0	0	0	0	0	0	0	0
A0A669EKW1	Transmembrane protein 117	tmem117	Oreochromis niloticus (Nile tilapia) (Tilapia nilotica)		membrane [GO:0016020]		0.99116	-0.33863	TYERIKR	0	0	0	0	0	0	0	0	0	0	751.75	0	0	0	0	0	0	0	0	0	0	0	0	0	0	0	0	0	0	0	0	0	0	0	0	0	0	0	0	0
A0A669EKY2	Desmoplakin	dsp	Oreochromis niloticus (Nile tilapia) (Tilapia nilotica)	intermediate filament cytoskeleton organization [GO:0045104]	cytoskeleton [GO:0005856]		1.0066	-1.5195	KIPFTEAKNK	0	0	0	0	0	0	0	0	0	0	0	0	0	0	0	0	0	0	0	0	0	0	0	0	0	0	0	0	0	0	0	0	0	0	0	0	0	0	0	0
A0A669EKZ4	Solute carrier family 13 member 4	slc13a4	Oreochromis niloticus (Nile tilapia) (Tilapia nilotica)		membrane [GO:0016020]	solute:sodium symporter activity [GO:0015370]	0.99373	-0.73588	QELSTLSDTK	996.55	0	0	0	0	0	0	0	0	0	0	0	0	0	0	0	0	0	0	0	0	0	0	0	0	0	0	0	0	0	0	0	0	0	0	0	0	0	0	0
A0A669EL15	C-C motif chemokine 4	LOC100691327	Oreochromis niloticus (Nile tilapia) (Tilapia nilotica)	immune response [GO:0006955]	extracellular space [GO:0005615]	chemokine activity [GO:0008009]	1.0036	-0.97329	IEPPVKMSLK	0	0	0	0	0	0	0	0	0	0	0	0	0	0	0	0	0	0	0	0	0	0	0	0	0	0	0	0	0	0	0	0	0	0	0	0	0	0	0	0
A0A669EL42	Cell division cycle and apoptosis regulator 1		Oreochromis niloticus (Nile tilapia) (Tilapia nilotica)	cell cycle [GO:0007049]; regulation of DNA-templated transcription [GO:0006355]	cytoplasm [GO:0005737]		1.0012	-1.4662	ALAALPTK	0	0	0	0	0	0	0	0	0	0	0	0	0	0	0	0	0	0	0	0	0	0	0	0	0	0	0	0	0	0	0	0	0	0	0	0	0	0	0	0
A0A669EL85	Mitogen-activated protein kinase (EC 2.7.11.24)		Oreochromis niloticus (Nile tilapia) (Tilapia nilotica)	protein phosphorylation [GO:0006468]	cytoplasm [GO:0005737]	ATP binding [GO:0005524]; MAP kinase activity [GO:0004707]	0.98684	-0.11515	AHILRGPHKQVK	0	0	819.85	0	0	0	0	0	0	0	0	0	0	0	0	0	0	0	0	0	0	0	0	0	0	760.46	802.35	0	0	0	0	0	0	0	0	0	0	0	0	0
A0A669EL94	Armadillo like helical domain containing 3	armh3	Oreochromis niloticus (Nile tilapia) (Tilapia nilotica)		membrane [GO:0016020]		0.99359	-0.05427	YASIVMQDTK	0	1199.5	0	738.62	691.56	721.54	1209.2	1142.4	1261.4	763.25	725.22	608.6	0	0	0	0	0	0	574.75	0	640.92	0	592.61	0	0	0	0	1028.6	1018.2	977.39	0	0	0	0	0	0	0	0	940.61	0
A0A669ELE3	Anion exchange protein	slc4a2	Oreochromis niloticus (Nile tilapia) (Tilapia nilotica)		plasma membrane [GO:0005886]	monoatomic anion transmembrane transporter activity [GO:0008509]; solute:inorganic anion antiporter activity [GO:0005452]	0.99238	-0.31697	LGREHPLKR	0	0	0	0	0	0	0	0	0	0	0	0	0	0	0	0	0	0	0	0	0	0	0	0	0	0	0	0	0	902.25	0	0	0	0	0	0	0	0	0	0
A0A669ELH7	Spectrin repeat containing, nuclear envelope 1b		Oreochromis niloticus (Nile tilapia) (Tilapia nilotica)	cellular localization [GO:0051641]	membrane [GO:0016020]; nuclear envelope [GO:0005635]	actin binding [GO:0003779]	1.0034	-2.0693	KLEQHKEVLK	0	0	0	0	0	0	0	0	0	0	0	0	0	0	0	0	0	0	0	0	0	1585.4	1735.5	1789.9	0	0	0	0	0	0	0	0	0	0	0	0	0	472.85	0	0
A0A669ELJ8	Dedicator of cytokinesis 3		Oreochromis niloticus (Nile tilapia) (Tilapia nilotica)	small GTPase mediated signal transduction [GO:0007264]	cytoplasm [GO:0005737]	guanyl-nucleotide exchange factor activity [GO:0005085]	0.99959	-2.2912	EFLHYPAQTEWHR	0	0	0	0	0	0	0	0	0	0	0	0	0	0	0	0	0	0	0	0	0	0	0	0	0	0	0	0	0	0	0	0	0	0	0	0	0	0	0	0
A0A669ELK0	ribonuclease H (EC 3.1.26.4)		Oreochromis niloticus (Nile tilapia) (Tilapia nilotica)	DNA integration [GO:0015074]		nucleic acid binding [GO:0003676]	0.99795	-1.049	VVLDRLR	0	0	0	0	0	0	0	0	0	0	81290	0	0	0	0	0	59368	0	0	0	0	0	0	0	0	0	0	0	76266	0	0	0	0	0	0	0	0	0	0	0
A0A669ELL3	Uncharacterized protein		Oreochromis niloticus (Nile tilapia) (Tilapia nilotica)			zinc ion binding [GO:0008270]	0.99938	-2.4874	AGVDWTER	0	0	0	0	0	0	0	0	0	0	0	0	0	0	0	0	0	0	0	0	0	0	0	3296.9	0	0	0	0	0	0	0	0	0	0	0	0	0	0	0	0
A0A669ELR1	Integrin alpha-5	LOC100711983	Oreochromis niloticus (Nile tilapia) (Tilapia nilotica)	cell adhesion [GO:0007155]; integrin-mediated signaling pathway [GO:0007229]	integrin complex [GO:0008305]		1.0058	-0.88821	KMPYAIQPK	0	0	0	0	0	0	0	0	0	0	0	0	0	0	0	0	0	0	0	0	0	0	0	0	0	0	0	0	0	0	0	0	0	0	0	0	0	0	0	0
A0A669ELS2	Zinc finger SWIM-type containing 7	zswim7	Oreochromis niloticus (Nile tilapia) (Tilapia nilotica)				0.98745	-0.60589	AVHQGCGHCVLNFL	0	0	0	0	0	0	0	0	0	0	0	0	0	0	0	0	0	0	0	0	0	740.27	0	0	0	0	0	0	0	0	0	0	0	0	0	0	0	0	0	0
A0A669ELY6	Histone-lysine N-methyltransferase SETD1B-A	LOC100692647	Oreochromis niloticus (Nile tilapia) (Tilapia nilotica)	histone H3-K4 methylation [GO:0051568]	Set1C/COMPASS complex [GO:0048188]	histone H3K4 trimethyltransferase activity [GO:0140999]; RNA binding [GO:0003723]	0.99764	-3.7762	DKIKYLQSTR	0	0	0	0	0	0	0	0	0	0	0	0	0	0	0	0	0	0	0	0	0	0	0	0	0	0	0	0	0	0	0	0	0	0	0	0	0	0	0	0
A0A669EM69	Carboxypeptidase D	cpd	Oreochromis niloticus (Nile tilapia) (Tilapia nilotica)	proteolysis [GO:0006508]	membrane [GO:0016020]	metallocarboxypeptidase activity [GO:0004181]; zinc ion binding [GO:0008270]	0.99055	-0.76452	KSLLSMLVEIHK	0	0	0	0	0	0	0	0	0	0	0	0	0	0	0	0	0	0	0	0	0	0	0	0	0	0	0	0	0	0	0	0	0	0	0	0	0	0	0	0
A0A669EMD8	Si:ch211-156l18.7		Oreochromis niloticus (Nile tilapia) (Tilapia nilotica)		intermediate filament [GO:0005882]	structural molecule activity [GO:0005198]	0	35.983	LAADDFR	2895.7	2863.5	2557.2	1643.6	1934.7	1807.1	4538.4	4721.5	4317.8	1254.8	1315.4	1331.6	862.12	853.52	852.21	1562.2	1442.1	1534.5	2013.6	1952.1	1948.7	15471	14326	11909	1219.2	1040.6	1195.3	2392.8	2552	2547.3	1955.4	2319.8	2139.6	1716.9	1635.3	1776.6	1584.9	1472.5	1709.3	1595.6
A0A669EMG1	Sacsin	LOC106097615	Oreochromis niloticus (Nile tilapia) (Tilapia nilotica)				1.0023	-2.1742	HKTNPGIK	0	0	0	0	0	0	1032.3	1065.4	0	0	0	0	0	0	0	0	0	0	0	0	0	1521.8	0	0	0	0	0	0	0	0	0	0	0	0	0	0	0	0	0	0
A0A669EMG4	IQ motif and Sec7 domain ArfGEF 2a		Oreochromis niloticus (Nile tilapia) (Tilapia nilotica)	regulation of ARF protein signal transduction [GO:0032012]		guanyl-nucleotide exchange factor activity [GO:0005085]	0.99713	-0.83452	LSQENKDLR	0	0	0	0	0	0	0	0	0	0	0	0	0	0	0	0	0	0	0	0	0	0	0	0	0	0	0	0	0	0	0	0	0	0	0	0	0	0	0	0
A0A669EMH0	Phosphofructokinase, muscle b		Oreochromis niloticus (Nile tilapia) (Tilapia nilotica)	fructose 6-phosphate metabolic process [GO:0006002]	cytoplasm [GO:0005737]	6-phosphofructokinase activity [GO:0003872]; metal ion binding [GO:0046872]	0.98588	-0.76167	RGLESAI	0	0	0	0	0	0	0	0	1828.4	0	0	0	0	0	0	0	0	0	0	0	0	0	0	0	0	0	0	835.31	0	0	0	0	0	0	0	0	0	718.54	0	0
A0A669EMK4	B30.2/SPRY domain-containing protein		Oreochromis niloticus (Nile tilapia) (Tilapia nilotica)				1.0124	-1.1741	GVPIEFK	0	0	0	0	0	0	0	0	0	0	0	0	0	0	0	0	0	0	0	0	0	0	0	0	0	0	0	0	0	0	0	0	0	0	0	0	0	0	0	0
A0A669EMN0	Ras association domain family member 1	RASSF1	Oreochromis niloticus (Nile tilapia) (Tilapia nilotica)	signal transduction [GO:0007165]			1.0025	-2.1548	LARPVSVPTPK	0	0	0	0	0	0	0	0	0	0	0	0	0	0	0	0	0	0	0	0	0	0	0	0	0	0	0	0	0	0	0	0	0	0	0	0	0	0	0	0
A0A669ENB4	Arachidonate 12-lipoxygenase, 12R-type	LOC100706043	Oreochromis niloticus (Nile tilapia) (Tilapia nilotica)	lipid oxidation [GO:0034440]		metal ion binding [GO:0046872]; oxidoreductase activity, acting on single donors with incorporation of molecular oxygen, incorporation of two atoms of oxygen [GO:0016702]	1.0148	-1.1741	GASSFVR	0	0	0	0	0	0	0	0	0	0	0	0	0	0	0	0	0	0	0	0	0	0	0	0	0	0	0	0	0	0	0	0	0	0	0	0	0	0	0	0
A0A669END4	Integrase catalytic domain-containing protein		Oreochromis niloticus (Nile tilapia) (Tilapia nilotica)	DNA integration [GO:0015074]		nucleic acid binding [GO:0003676]	0.99273	-0.80166	AKVHKHIK	0	0	0	0	0	0	0	0	0	0	332.81	0	0	0	0	0	0	0	0	0	0	0	0	0	742.89	0	666.06	0	0	0	0	0	0	0	0	0	0	0	0	0
A0A669ENE1	Discs large MAGUK scaffold protein 5	dlg5	Oreochromis niloticus (Nile tilapia) (Tilapia nilotica)				0.99719	-2.9275	IKIPSTPR	0	0	0	0	0	0	0	0	0	0	0	0	0	0	0	0	0	0	0	0	0	0	0	0	0	0	0	0	0	0	0	0	0	0	0	0	0	0	0	0
A0A669ENE7	Importin subunit alpha	kpna6	Oreochromis niloticus (Nile tilapia) (Tilapia nilotica)	protein import into nucleus [GO:0006606]	cytoplasm [GO:0005737]	nuclear import signal receptor activity [GO:0061608]	1.0054	-1.0956	SGGMTAQMLR	0	0	0	0	0	0	0	0	0	0	0	0	0	0	0	0	0	0	0	0	0	0	0	0	0	0	0	0	0	0	0	0	0	0	0	0	0	0	0	0
A0A669ENG2	Ladderlectin-like	LOC100707134	Oreochromis niloticus (Nile tilapia) (Tilapia nilotica)		membrane [GO:0016020]		1.0131	-1.1741	LLADTEK	0	0	0	0	0	0	0	0	0	0	0	0	0	0	0	0	0	0	0	0	0	0	0	0	0	0	0	0	0	0	0	0	0	0	0	0	0	0	0	0
A0A669ENG6	IK cytokine		Oreochromis niloticus (Nile tilapia) (Tilapia nilotica)		nucleus [GO:0005634]		0.99619	-2.9194	SYYAKLR	0	0	0	0	0	0	0	0	0	0	0	0	0	0	0	0	0	0	0	0	0	0	0	0	0	0	0	0	0	0	0	0	0	0	0	0	0	0	0	0
A0A669ENK5	Grass carp reovirus (GCRV)-induced gene 2p		Oreochromis niloticus (Nile tilapia) (Tilapia nilotica)			NAD+ ADP-ribosyltransferase activity [GO:0003950]	0	1.7638	TELQELLAK	0	0	0	0	0	0	0	0	0	0	0	0	0	0	0	0	0	0	0	0	0	408.34	0	0	0	0	0	0	0	0	0	0	0	0	0	0	0	0	0	0
A0A669ENL3	Plakophilin 2	pkp2	Oreochromis niloticus (Nile tilapia) (Tilapia nilotica)	cell-cell adhesion [GO:0098609]			1.0139	-1.1741	TETGPTR	0	0	0	0	0	0	0	0	0	0	0	0	0	0	0	0	0	0	0	0	0	0	0	0	0	0	0	0	0	0	0	0	0	0	0	0	0	0	0	0
A0A669ENR9	Solute carrier family 24 member 5		Oreochromis niloticus (Nile tilapia) (Tilapia nilotica)		membrane [GO:0016020]	antiporter activity [GO:0015297]; calcium ion transmembrane transporter activity [GO:0015085]	0.99881	-3.4834	IETQRLLGWNDDTSLR	0	0	0	0	0	0	0	1554	0	0	0	0	0	0	0	0	731.2	0	0	0	0	0	0	0	0	0	0	0	0	0	0	0	0	0	0	0	0	0	0	0
A0A669ENU0	DNA (cytosine-5)-methyltransferase (EC 2.1.1.37)	dnmt1	Oreochromis niloticus (Nile tilapia) (Tilapia nilotica)		nucleus [GO:0005634]	chromatin binding [GO:0003682]; DNA (cytosine-5-)-methyltransferase activity [GO:0003886]; DNA binding [GO:0003677]; zinc ion binding [GO:0008270]	1.0119	-0.26206	FGGSGKSKQACK	0	0	0	0	0	0	0	0	0	0	0	0	0	0	0	0	0	0	0	0	0	0	0	0	0	0	0	0	0	0	0	0	0	1305.6	0	0	0	0	0	0
A0A669ENV8	Synaptic vesicle glycoprotein 2B	LOC100697206	Oreochromis niloticus (Nile tilapia) (Tilapia nilotica)	chemical synaptic transmission [GO:0007268]	membrane [GO:0016020]; synapse [GO:0045202]	transmembrane transporter activity [GO:0022857]	1	-2.5097	AFERGDDEIICLCGR	0	0	0	0	0	0	0	0	0	0	0	0	0	0	0	0	0	0	0	0	0	1012	0	0	0	0	0	0	0	0	0	0	0	0	0	0	0	0	0	0
A0A669ENW6	sn-1-specific diacylglycerol lipase (EC 3.1.1.116)	daglb	Oreochromis niloticus (Nile tilapia) (Tilapia nilotica)	lipid metabolic process [GO:0006629]	membrane [GO:0016020]		1.0011	-0.94685	YGEAILSER	4256.2	0	0	0	0	0	0	0	0	0	0	0	932.03	940.85	0	0	0	0	2703.9	0	0	0	2185.8	0	0	0	1100.8	0	0	0	0	0	0	0	2003.9	0	0	0	0	0
A0A669ENX2	Receptor protein-tyrosine kinase (EC 2.7.10.1)	LOC100711613	Oreochromis niloticus (Nile tilapia) (Tilapia nilotica)	ERBB signaling pathway [GO:0038127]; protein phosphorylation [GO:0006468]; regulation of cell population proliferation [GO:0042127]	plasma membrane region [GO:0098590]	ATP binding [GO:0005524]; transmembrane receptor protein tyrosine kinase activity [GO:0004714]	1.0119	-1.1741	LLTADEK	0	0	0	0	0	0	0	1964.3	0	0	0	0	0	0	0	0	0	0	0	0	0	0	0	0	0	0	0	0	0	0	0	0	0	0	0	0	0	0	0	0
A0A669EP19	Proteasome subunit beta	psmb7	Oreochromis niloticus (Nile tilapia) (Tilapia nilotica)	immune system process [GO:0002376]; proteolysis involved in protein catabolic process [GO:0051603]	cytoplasm [GO:0005737]; nucleus [GO:0005634]; proteasome core complex [GO:0005839]	threonine-type endopeptidase activity [GO:0004298]	1.0097	-1.1453	LPRVATANRMLK	0	0	691.48	712.32	0	0	811.2	0	0	0	0	0	0	0	0	0	0	0	0	0	0	0	0	0	0	0	0	0	0	0	0	0	0	0	0	0	0	607.42	0	0
A0A669EP29	Transporter		Oreochromis niloticus (Nile tilapia) (Tilapia nilotica)		membrane [GO:0016020]	symporter activity [GO:0015293]	0.96552	0.022243	TNSLQILHLFK	0	0	0	0	0	0	0	0	0	0	0	0	0	0	0	0	938.13	0	0	0	0	0	0	0	0	0	751.96	2645.4	0	0	0	0	0	0	0	0	0	0	0	0
A0A669EP50	Acetyl-CoA acetyltransferase 1	acat1	Oreochromis niloticus (Nile tilapia) (Tilapia nilotica)			acyltransferase activity, transferring groups other than amino-acyl groups [GO:0016747]	0.97959	-0.065396	IVGHMVHNLK	0	0	0	0	0	0	0	0	0	0	0	0	0	0	0	0	0	0	0	0	0	0	0	0	0	0	0	982.65	0	0	0	0	0	0	0	0	0	0	0	0
A0A669EP94	[histone H3]-trimethyl-L-lysine(9) demethylase (EC 1.14.11.66)	LOC100703178	Oreochromis niloticus (Nile tilapia) (Tilapia nilotica)		nucleus [GO:0005634]	histone H3K9me2/H3K9me3 demethylase activity [GO:0140684]; metal ion binding [GO:0046872]	1.0019	-1.4662	HLDTLSPR	0	0	0	0	0	0	0	0	0	0	0	0	0	0	0	0	0	0	0	0	0	0	0	0	0	0	0	0	0	0	0	0	0	0	0	0	0	0	0	0
A0A669EPL7	Transformation/transcription domain associated protein	trrap	Oreochromis niloticus (Nile tilapia) (Tilapia nilotica)	protein phosphorylation [GO:0006468]		protein kinase activity [GO:0004672]	1.0121	-1.1741	NYSIPQK	0	0	0	0	0	0	0	0	0	0	0	0	0	0	0	0	0	0	0	0	0	0	0	0	0	0	0	0	0	0	0	0	0	0	0	0	0	0	0	0
A0A669EPR8	Microtubule-associated protein		Oreochromis niloticus (Nile tilapia) (Tilapia nilotica)		cytoplasm [GO:0005737]; microtubule [GO:0005874]	microtubule binding [GO:0008017]	0.98313	-0.50533	IINQPLPDFKNVK	0	0	0	0	0	0	0	0	0	0	0	0	0	0	0	0	0	0	0	0	0	0	861.38	0	0	0	0	0	0	0	0	0	0	0	0	0	0	0	0	0
A0A669EPS9	ABC-type glutathione-S-conjugate transporter (EC 7.6.2.3)	LOC100707969	Oreochromis niloticus (Nile tilapia) (Tilapia nilotica)		plasma membrane [GO:0005886]	ABC-type transporter activity [GO:0140359]; ATP binding [GO:0005524]; ATP hydrolysis activity [GO:0016887]	0.99441	-0.33292	VNTKHLSKLYICK	0	0	0	0	0	0	0	0	0	0	0	0	0	0	0	0	0	0	0	0	0	1430.8	0	0	0	0	0	0	0	0	0	0	0	0	0	0	0	0	0	0
A0A669EPU6	Telomere length regulation protein TEL2 homolog	telo2	Oreochromis niloticus (Nile tilapia) (Tilapia nilotica)				1.0017	-1.4662	YHADQYVR	0	0	0	0	0	0	0	0	0	1463.4	0	0	0	0	0	0	0	0	0	0	0	0	0	0	0	0	0	0	0	0	0	0	0	0	0	0	0	0	0	0
A0A669EQ13	Cytochrome P450 3A (EC 1.14.14.-)		Oreochromis niloticus (Nile tilapia) (Tilapia nilotica)		endoplasmic reticulum membrane [GO:0005789]	heme binding [GO:0020037]; iron ion binding [GO:0005506]; oxidoreductase activity, acting on paired donors, with incorporation or reduction of molecular oxygen, reduced flavin or flavoprotein as one donor, and incorporation of one atom of oxygen [GO:0016712]	0.95906	-0.022614	QHSTVLISSMKK	0	0	0	0	0	0	0	0	0	0	0	0	0	0	0	0	0	0	0	0	0	0	871.65	0	0	0	0	0	0	0	0	0	0	0	0	0	0	0	0	0
A0A669EQ34	C5a anaphylatoxin chemotactic receptor 1-like	LOC100690266	Oreochromis niloticus (Nile tilapia) (Tilapia nilotica)	chemotaxis [GO:0006935]	membrane [GO:0016020]	complement receptor activity [GO:0004875]; G protein-coupled receptor activity [GO:0004930]	0.99834	-1.0518	TQRGMTR	0	0	0	0	0	0	0	0	0	0	0	0	0	0	0	0	0	0	0	0	0	0	0	0	0	0	0	0	0	0	0	0	0	0	0	0	0	0	0	0
A0A669EQ52	Poly [ADP-ribose] polymerase (PARP) (EC 2.4.2.-)	LOC100704951	Oreochromis niloticus (Nile tilapia) (Tilapia nilotica)			NAD+ ADP-ribosyltransferase activity [GO:0003950]	0.99901	-3.2773	IAKTIHR	395.93	0	0	0	0	0	0	0	0	0	0	0	0	0	0	0	0	0	0	0	0	0	0	0	0	0	0	0	0	0	0	0	0	0	0	0	0	0	0	0
A0A669EQ67	Extracellular sulfatase Sulf-2	SULF2	Oreochromis niloticus (Nile tilapia) (Tilapia nilotica)		cell surface [GO:0009986]; endoplasmic reticulum [GO:0005783]; Golgi stack [GO:0005795]	sulfuric ester hydrolase activity [GO:0008484]	0.99955	-1.7077	NLREVRGHLK	0	0	0	0	0	0	0	0	0	0	0	0	0	0	0	0	462.91	414.6	0	0	0	0	0	0	0	0	0	0	0	0	0	0	0	0	0	0	0	0	0	0
A0A669EQC4	Uncharacterized LOC102079890	LOC102079890	Oreochromis niloticus (Nile tilapia) (Tilapia nilotica)			ubiquitin-protein transferase activity [GO:0004842]	1.0032	-2.0673	EKLLEIK	0	0	0	0	0	819.2	0	0	0	0	0	0	0	0	0	0	0	811.88	0	0	0	0	0	0	0	0	0	0	0	0	0	0	0	0	0	0	424.1	0	0	0
A0A669EQD2	Cell surface A33 antigen-like	LOC100698318	Oreochromis niloticus (Nile tilapia) (Tilapia nilotica)		plasma membrane [GO:0005886]		1.0118	-1.1524	DSYEDSSVK	0	0	0	0	0	0	0	0	0	0	0	0	0	0	0	0	0	0	0	0	0	0	0	0	0	0	0	0	0	0	0	0	0	0	0	0	0	0	0	0
A0A669EQF6	Reverse transcriptase domain-containing protein		Oreochromis niloticus (Nile tilapia) (Tilapia nilotica)				1.0113	-0.26014	SSKVLAYKLR	0	0	0	0	0	0	0	0	0	0	0	0	0	0	0	0	0	0	0	0	0	0	0	0	0	0	0	9625.5	0	0	0	0	0	0	0	0	0	0	0	0
A0A669EQQ4	Centromere protein E	cenpe	Oreochromis niloticus (Nile tilapia) (Tilapia nilotica)	microtubule-based movement [GO:0007018]; system development [GO:0048731]		ATP binding [GO:0005524]; microtubule binding [GO:0008017]; microtubule motor activity [GO:0003777]	1.0146	-0.22411	ERDELQEILEGLR	0	0	0	0	0	0	0	546.12	0	0	0	0	0	0	0	0	0	0	0	0	0	0	0	0	0	0	0	0	0	0	0	0	0	0	0	0	0	0	0	0
A0A669EQQ5	G protein nucleolar 1 (putative)	gnl1	Oreochromis niloticus (Nile tilapia) (Tilapia nilotica)			GTP binding [GO:0005525]; GTPase activity [GO:0003924]	0.99361	-0.31697	GYKTAKAAR	0	0	0	0	0	0	0	0	0	0	0	0	0	0	0	0	0	0	0	0	0	0	0	0	0	0	0	0	0	0	0	0	0	0	0	0	0	0	0	0
A0A669EQR8	Neurogenin 3		Oreochromis niloticus (Nile tilapia) (Tilapia nilotica)			protein dimerization activity [GO:0046983]	1.005	-1.6144	GLLPPATR	0	0	0	0	0	29236	0	0	0	0	0	0	0	0	0	0	0	0	0	0	0	0	0	0	0	0	0	29769	0	0	0	0	0	0	0	0	0	0	0	0
A0A669EQU1	Sushi, von Willebrand factor type A, EGF and pentraxin domain containing 1		Oreochromis niloticus (Nile tilapia) (Tilapia nilotica)	animal organ development [GO:0048513]; cell development [GO:0048468]; system development [GO:0048731]	extracellular region [GO:0005576]	calcium ion binding [GO:0005509]	1.0038	-1.4662	AVACVSAR	0	0	0	0	0	0	0	0	0	0	0	0	0	0	0	0	0	0	0	0	0	743.84	752.61	835.22	0	0	0	0	0	0	0	0	0	0	0	0	0	0	0	0
A0A669EQX4	DNA helicase (EC 3.6.4.12)	chd8	Oreochromis niloticus (Nile tilapia) (Tilapia nilotica)			ATP binding [GO:0005524]; ATP-dependent chromatin remodeler activity [GO:0140658]; hydrolase activity [GO:0016787]	1.0121	-1.1524	EHLIPGAYK	0	0	0	0	0	0	0	0	0	0	0	0	0	0	0	0	0	0	0	0	0	0	0	0	0	0	0	0	0	0	0	0	0	0	0	0	0	0	0	0
A0A669ER73	Nonsense-mediated mRNA decay factor	lamc2	Oreochromis niloticus (Nile tilapia) (Tilapia nilotica)	nuclear-transcribed mRNA catabolic process, nonsense-mediated decay [GO:0000184]	nucleus [GO:0005634]		0.9948	-0.30634	KTPVSEAKK	0	0	0	0	0	0	0	0	0	0	0	0	0	2216.3	0	0	0	0	0	0	0	0	0	0	0	0	0	0	0	0	0	0	0	0	0	0	0	2256.2	0	0
A0A669ERG8	alanine transaminase (EC 2.6.1.2)		Oreochromis niloticus (Nile tilapia) (Tilapia nilotica)	biosynthetic process [GO:0009058]; L-alanine catabolic process [GO:0042853]		pyridoxal phosphate binding [GO:0030170]; transaminase activity [GO:0008483]	1.004	-1.3439	ETIEKVIR	0	0	0	0	0	0	0	0	0	0	0	0	0	0	0	0	0	0	0	0	0	0	0	0	0	0	0	0	0	0	0	0	0	0	0	0	0	0	0	0
A0A669ERI1	Serine/threonine-protein phosphatase 6 regulatory ankyrin repeat subunit C	ANKRD52	Oreochromis niloticus (Nile tilapia) (Tilapia nilotica)				0.98926	-0.71624	DQGLLTPLHR	0	0	0	0	0	0	0	0	0	0	0	0	0	0	0	0	0	0	0	0	0	0	0	0	0	0	0	0	0	0	0	0	0	0	0	0	0	0	0	0
A0A669ERJ3	Uncharacterized protein		Oreochromis niloticus (Nile tilapia) (Tilapia nilotica)				0.99385	-0.33764	GLIITMPLVHHLK	0	0	0	0	0	0	0	0	0	0	0	0	0	0	0	0	0	0	0	0	0	0	0	0	0	0	0	0	0	0	0	0	0	0	0	0	0	0	0	0
A0A669ERK0	hyaluronoglucosaminidase (EC 3.2.1.35)	cemip2	Oreochromis niloticus (Nile tilapia) (Tilapia nilotica)		plasma membrane [GO:0005886]	hyalurononglucosaminidase activity [GO:0004415]	0	0.93939	RKDLELLK	0	0	1687.3	1278.5	1438.4	0	1555.3	0	1559.8	1651.5	1674.7	0	0	0	0	0	0	0	0	1387.8	0	1365.7	1316.4	0	1276	0	1206.9	0	1657.7	1824.3	0	1363.1	1389.3	1514.4	1455.5	1251.8	1319.8	0	0	1432
A0A669ERN5	Girdin	LOC100711774	Oreochromis niloticus (Nile tilapia) (Tilapia nilotica)	cytoskeleton-dependent intracellular transport [GO:0030705]	cytoplasm [GO:0005737]		0.98269	-0.53381	LEKENKHLLK	0	0	0	0	0	0	0	0	0	0	0	0	0	560.02	0	0	0	0	0	0	1172.7	0	0	0	0	632.21	0	0	0	0	0	0	0	0	0	0	0	0	0	0
A0A669ERQ0	Laminin subunit gamma 1	lamc1	Oreochromis niloticus (Nile tilapia) (Tilapia nilotica)	anatomical structure development [GO:0048856]	basement membrane [GO:0005604]		0.99864	-1.0518	ANRGFIR	0	0	0	0	0	0	0	0	0	0	0	1045.6	0	0	0	0	0	0	0	0	0	0	0	0	0	0	0	0	0	0	0	0	0	0	0	0	0	0	0	0
A0A669ERS6	non-specific serine/threonine protein kinase (EC 2.7.11.1)	trio	Oreochromis niloticus (Nile tilapia) (Tilapia nilotica)	protein phosphorylation [GO:0006468]	cytoplasm [GO:0005737]; membrane [GO:0016020]	ATP binding [GO:0005524]; guanyl-nucleotide exchange factor activity [GO:0005085]; protein serine/threonine kinase activity [GO:0004674]	1.0061	-1.6084	EHEEFHITAK	0	0	0	0	0	0	0	0	0	0	0	0	0	0	0	0	0	0	0	0	0	0	0	0	0	0	0	0	0	0	0	0	0	0	0	0	0	0	0	0
A0A669ES06	Reverse transcriptase domain-containing protein		Oreochromis niloticus (Nile tilapia) (Tilapia nilotica)				0.98528	-0.60403	CSSFSLFKNMFKNR	0	0	0	0	0	0	0	0	0	0	0	0	0	0	0	0	0	0	0	0	0	10795	10875	9588.4	0	0	0	0	0	0	0	0	0	0	0	0	0	0	0	0
A0A669ESA8	Peroxisomal ATPase PEX1 (Peroxin-1)	pex1	Oreochromis niloticus (Nile tilapia) (Tilapia nilotica)	peroxisome organization [GO:0007031]	cytosol [GO:0005829]; peroxisome [GO:0005777]	ATP binding [GO:0005524]; ATP hydrolysis activity [GO:0016887]	1.0089	-1.3439	VPSPKEMR	0	959.91	0	0	0	1294.5	0	0	0	0	0	1330.1	0	0	0	0	0	0	0	0	0	0	0	0	0	0	0	0	0	0	0	0	0	0	0	0	0	658.59	0	0
A0A669ESC7	Propionyl-CoA carboxylase alpha chain, mitochondrial (EC 6.4.1.3) (Propanoyl-CoA:carbon dioxide ligase subunit alpha)		Oreochromis niloticus (Nile tilapia) (Tilapia nilotica)	lipid catabolic process [GO:0016042]	membrane [GO:0016020]; mitochondrial matrix [GO:0005759]	ATP binding [GO:0005524]; metal ion binding [GO:0046872]; propionyl-CoA carboxylase activity [GO:0004658]	1.0015	-1.3947	SYLNMDAIMDAIR	0	0	0	0	0	0	0	0	0	0	0	0	0	0	0	0	0	0	0	0	0	977.19	964.46	990.92	0	0	0	0	0	0	0	0	0	0	0	0	0	0	0	0
A0A669ESE4	Focadhesin	focad	Oreochromis niloticus (Nile tilapia) (Tilapia nilotica)	regulation of post-transcriptional gene silencing [GO:0060147]			1.0022	-0.97329	HTQGLIKVIR	0	0	0	0	0	0	0	0	0	0	0	0	0	0	0	0	0	0	0	0	0	0	0	0	0	0	3200.9	0	0	0	0	0	0	0	0	0	0	0	0	0
A0A669ESH0	Phosphatidylinositol glycan anchor biosynthesis, class T		Oreochromis niloticus (Nile tilapia) (Tilapia nilotica)	attachment of GPI anchor to protein [GO:0016255]	GPI-anchor transamidase complex [GO:0042765]		0.99867	-1.7797	LKTKQPR	0	0	0	0	0	0	0	0	0	0	0	0	0	0	0	0	0	0	0	0	0	0	0	0	0	0	0	0	731.86	0	0	0	0	0	0	0	0	0	0	0
A0A669ESJ3	protein kinase C (EC 2.7.11.13)	pkn1	Oreochromis niloticus (Nile tilapia) (Tilapia nilotica)	protein phosphorylation [GO:0006468]; signal transduction [GO:0007165]	cytoplasm [GO:0005737]; nucleus [GO:0005634]	ATP binding [GO:0005524]; calcium-dependent protein kinase C activity [GO:0004698]; small GTPase binding [GO:0031267]	1.0075	-1.5548	QPFFKSMDWEALLQK	0	0	0	0	0	0	0	0	0	0	0	0	0	0	0	0	0	0	0	0	0	0	0	0	0	0	0	0	0	0	0	0	0	0	0	0	0	0	0	0
A0A669ESJ5	Reverse transcriptase domain-containing protein		Oreochromis niloticus (Nile tilapia) (Tilapia nilotica)			catalytic activity [GO:0003824]	0.98185	-0.17087	QLMRLRDQLLK	0	0	0	0	0	0	0	0	0	0	0	0	0	0	0	0	0	0	0	0	619.26	0	0	0	0	0	0	0	0	0	0	0	0	0	0	0	0	0	0	0
A0A669ESK2	Ankyrin repeat domain 44		Oreochromis niloticus (Nile tilapia) (Tilapia nilotica)				0.99327	-0.33863	RNVIRNK	2664.7	0	0	0	0	0	0	0	0	0	0	0	0	0	0	0	0	0	0	0	0	0	0	0	7951.9	0	0	0	0	0	0	2402.6	0	0	3538.8	0	0	0	0	0
A0A669ESQ4	Negative elongation factor E	nelfe	Oreochromis niloticus (Nile tilapia) (Tilapia nilotica)	regulation of DNA-templated transcription [GO:0006355]	chromosome [GO:0005694]; NELF complex [GO:0032021]	RNA binding [GO:0003723]	0.99821	-3.2337	DLDRERDR	0	0	0	0	0	0	0	0	0	0	0	0	0	0	0	0	0	0	0	0	0	0	0	0	0	0	0	0	0	0	0	0	0	0	0	0	0	0	0	0
A0A669ESU4	Rho GDP-dissociation inhibitor 1	LOC100699327	Oreochromis niloticus (Nile tilapia) (Tilapia nilotica)	Rho protein signal transduction [GO:0007266]	cytoplasm [GO:0005737]	Rho GDP-dissociation inhibitor activity [GO:0005094]	0.99359	-0.31697	IKICFKVNK	0	0	0	0	0	0	0	0	0	0	0	0	0	0	0	0	0	0	0	0	0	0	0	0	0	0	0	0	0	0	0	0	0	0	0	0	0	0	0	0
A0A669ESY5	Neuropilin	nrp2	Oreochromis niloticus (Nile tilapia) (Tilapia nilotica)	angiogenesis [GO:0001525]; axon guidance [GO:0007411]; regulation of response to external stimulus [GO:0032101]	membrane [GO:0016020]	heparin binding [GO:0008201]; metal ion binding [GO:0046872]; semaphorin receptor activity [GO:0017154]; vascular endothelial growth factor receptor activity [GO:0005021]	1.0069	-1.1103	VPQPVLARFVR	0	0	0	0	0	0	0	0	0	0	0	0	0	0	0	0	0	0	0	0	0	0	0	0	0	0	0	0	0	0	0	0	0	0	0	0	0	0	0	0
[truncated: 949 more rows]
[truncated: 86 more columns]
