# Supplementary material for: Proteomic and phosphoproteomic profilings reveal distinct cellular responses during Tilapinevirus tilapiae entry and replication
Source: PeerJ. 2025 Feb 21;13:e18923. doi: 10.7717/peerj.18923 (PMC11849505; doi:10.7717/peerj.18923)
Supplement: Supplemental Information 3 [file peerj-13-18923-s003.xlsx]

## Sheet: Sheet 1
	f.value	p.value	-log10(p)	FDR	Fisher's LSD
A0A669DW65	62.739	4.6346e-23	22.334	8.1846e-20	E11_BL - E11_10min; E11_BL - E11_30min; E11_BL - E11_1hr; E11_BL - E11_3hr; E11_BL - E11_6hr; E11_BL - E11_24hr
A0A669B0F9	41.812	6.0902e-19	18.215	4.7683e-16	E11_BL - E11_10min; E11_BL - E11_30min; E11_BL - E11_1hr; E11_BL - E11_3hr; E11_BL - E11_6hr; E11_BL - E11_24hr
A0A669BUB2	41.286	8.1001e-19	18.092	4.7683e-16	E11_BL - E11_10min; E11_BL - E11_30min; E11_BL - E11_1hr; E11_BL - E11_3hr; E11_BL - E11_6hr; E11_BL - E11_24hr; E11_10min - E11_30min; E11_10min - E11_1hr; E11_10min - E11_3hr; E11_10min - E11_6hr; E11_10min - E11_24hr
X2KK51	34.45	4.3926e-17	16.357	1.9393e-14	E11_BL - E11_1hr; E11_BL - E11_3hr; E11_BL - E11_6hr; E11_BL - E11_24hr; E11_10min - E11_3hr; E11_10min - E11_6hr; E11_10min - E11_24hr; E11_30min - E11_3hr; E11_30min - E11_6hr; E11_30min - E11_24hr; E11_1hr - E11_24hr; E11_3hr - E11_24hr; E11_6hr - E11_24hr
A0A669ESI8	29.543	1.1465e-15	14.941	4.0494e-13	E11_BL - E11_1hr; E11_BL - E11_3hr; E11_BL - E11_6hr; E11_BL - E11_24hr; E11_10min - E11_1hr; E11_10min - E11_3hr; E11_10min - E11_6hr; E11_10min - E11_24hr; E11_30min - E11_1hr; E11_30min - E11_3hr; E11_30min - E11_6hr; E11_30min - E11_24hr
I3KQM9	28.898	1.8124e-15	14.742	5.3346e-13	E11_BL - E11_10min; E11_BL - E11_30min; E11_BL - E11_1hr; E11_BL - E11_3hr; E11_BL - E11_6hr; E11_BL - E11_24hr; E11_10min - E11_30min; E11_10min - E11_1hr; E11_10min - E11_3hr; E11_10min - E11_6hr; E11_10min - E11_24hr
A0A669BMH6	27.317	5.7559e-15	14.24	1.4521e-12	E11_BL - E11_10min; E11_BL - E11_30min; E11_BL - E11_1hr; E11_BL - E11_3hr; E11_BL - E11_6hr; E11_BL - E11_24hr
A0A669DAQ0	22.581	2.5097e-13	12.6	5.5403e-11	E11_BL - E11_10min; E11_BL - E11_30min; E11_BL - E11_1hr; E11_BL - E11_3hr; E11_BL - E11_6hr; E11_BL - E11_24hr; E11_10min - E11_30min; E11_10min - E11_1hr; E11_10min - E11_3hr; E11_10min - E11_6hr; E11_10min - E11_24hr
I3KTF5	19.487	4.0042e-12	11.397	7.8572e-10	E11_BL - E11_1hr; E11_BL - E11_3hr; E11_BL - E11_24hr; E11_10min - E11_24hr; E11_30min - E11_1hr; E11_30min - E11_24hr; E11_1hr - E11_24hr; E11_3hr - E11_24hr; E11_6hr - E11_24hr
I3JAS8	18.637	9.003e-12	11.046	1.5899e-09	E11_BL - E11_10min; E11_BL - E11_30min; E11_BL - E11_1hr; E11_BL - E11_3hr; E11_BL - E11_6hr; E11_BL - E11_24hr
A0A669BWH7	18.395	1.1392e-11	10.943	1.8289e-09	E11_BL - E11_30min; E11_BL - E11_1hr; E11_BL - E11_3hr; E11_BL - E11_6hr; E11_BL - E11_24hr; E11_10min - E11_30min; E11_10min - E11_1hr; E11_10min - E11_3hr; E11_10min - E11_6hr; E11_10min - E11_24hr; E11_30min - E11_3hr; E11_30min - E11_6hr; E11_30min - E11_24hr; E11_1hr - E11_6hr; E11_1hr - E11_24hr; E11_3hr - E11_24hr
A0A669F2E5	14.7	5.3569e-10	9.2711	7.8835e-08	E11_BL - E11_30min; E11_BL - E11_1hr; E11_BL - E11_3hr; E11_BL - E11_6hr; E11_BL - E11_24hr; E11_10min - E11_30min; E11_10min - E11_1hr; E11_10min - E11_3hr; E11_10min - E11_6hr; E11_10min - E11_24hr
I3JRH6	14.317	8.234e-10	9.0844	1.1186e-07	E11_BL - E11_10min; E11_BL - E11_30min; E11_BL - E11_1hr; E11_BL - E11_3hr; E11_BL - E11_6hr; E11_BL - E11_24hr; E11_10min - E11_1hr; E11_10min - E11_3hr; E11_10min - E11_24hr; E11_6hr - E11_1hr; E11_6hr - E11_3hr; E11_6hr - E11_24hr
I3KF98	11.102	4.0159e-08	7.3962	5.0097e-06	E11_BL - E11_10min; E11_BL - E11_30min; E11_BL - E11_1hr; E11_BL - E11_3hr; E11_BL - E11_6hr; E11_BL - E11_24hr
A0A669D405	11.058	4.2551e-08	7.3711	5.0097e-06	E11_BL - E11_10min; E11_BL - E11_30min; E11_BL - E11_1hr; E11_BL - E11_3hr; E11_BL - E11_6hr; E11_BL - E11_24hr
A0A669F9W3	9.9905	1.7532e-07	6.7562	1.8846e-05	E11_BL - E11_10min; E11_BL - E11_30min; E11_BL - E11_1hr; E11_BL - E11_3hr; E11_BL - E11_6hr; E11_BL - E11_24hr
A0A669F803	9.9653	1.8142e-07	6.7413	1.8846e-05	E11_24hr - E11_BL; E11_24hr - E11_10min; E11_24hr - E11_30min; E11_24hr - E11_1hr; E11_24hr - E11_3hr; E11_24hr - E11_6hr
I3KYV3	9.6325	2.863e-07	6.5432	2.8089e-05	E11_BL - E11_10min; E11_BL - E11_30min; E11_BL - E11_1hr; E11_BL - E11_3hr; E11_BL - E11_6hr; E11_BL - E11_24hr
I3J505	9.3259	4.3852e-07	6.358	4.0759e-05	E11_BL - E11_10min; E11_BL - E11_30min; E11_BL - E11_1hr; E11_BL - E11_3hr; E11_BL - E11_6hr; E11_BL - E11_24hr; E11_10min - E11_1hr; E11_10min - E11_24hr
Q8UW60	9.0359	6.6009e-07	6.1804	5.8286e-05	E11_BL - E11_10min; E11_BL - E11_30min; E11_BL - E11_1hr; E11_BL - E11_3hr; E11_BL - E11_6hr; E11_BL - E11_24hr; E11_10min - E11_1hr; E11_10min - E11_3hr; E11_10min - E11_24hr; E11_6hr - E11_1hr; E11_6hr - E11_3hr; E11_6hr - E11_24hr
A0A669BFI2	8.6831	1.0938e-06	5.9611	9.1986e-05	E11_BL - E11_10min; E11_BL - E11_1hr; E11_BL - E11_3hr; E11_BL - E11_6hr; E11_BL - E11_24hr; E11_10min - E11_3hr; E11_10min - E11_24hr; E11_30min - E11_1hr; E11_30min - E11_3hr; E11_30min - E11_6hr; E11_30min - E11_24hr; E11_1hr - E11_24hr; E11_6hr - E11_24hr
A0A669C7N8	7.4078	7.2944e-06	5.137	0.00058554	E11_BL - E11_10min; E11_BL - E11_30min; E11_BL - E11_1hr; E11_BL - E11_3hr; E11_BL - E11_6hr; E11_BL - E11_24hr
A0A669BD97	6.7918	1.9029e-05	4.7206	0.0014611	E11_BL - E11_10min; E11_BL - E11_30min; E11_BL - E11_1hr; E11_BL - E11_3hr; E11_BL - E11_6hr; E11_BL - E11_24hr
A0A669AX96	6.7259	2.1121e-05	4.6753	0.0015541	E11_BL - E11_10min; E11_BL - E11_30min; E11_BL - E11_1hr; E11_BL - E11_3hr; E11_BL - E11_6hr; E11_BL - E11_24hr
I3K9Q4	6.6308	2.4564e-05	4.6097	0.0017352	E11_BL - E11_10min; E11_BL - E11_30min; E11_BL - E11_1hr; E11_BL - E11_3hr; E11_BL - E11_6hr; E11_BL - E11_24hr; E11_10min - E11_1hr; E11_10min - E11_3hr; E11_10min - E11_6hr; E11_10min - E11_24hr
I3KN85	6.5889	2.6264e-05	4.5806	0.0017839	E11_BL - E11_10min; E11_BL - E11_30min; E11_BL - E11_1hr; E11_BL - E11_3hr; E11_BL - E11_6hr; E11_BL - E11_24hr; E11_10min - E11_1hr; E11_10min - E11_24hr; E11_30min - E11_24hr
A0A669CMJ9	6.5507	2.7912e-05	4.5542	0.0018257	E11_BL - E11_10min; E11_BL - E11_30min; E11_BL - E11_1hr; E11_BL - E11_3hr; E11_BL - E11_6hr; E11_BL - E11_24hr; E11_3hr - E11_10min; E11_24hr - E11_10min; E11_3hr - E11_30min; E11_24hr - E11_30min; E11_3hr - E11_6hr; E11_24hr - E11_6hr
A0A669CD39	6.3993	3.5586e-05	4.4487	0.0020783	E11_BL - E11_10min; E11_BL - E11_30min; E11_BL - E11_1hr; E11_BL - E11_3hr; E11_BL - E11_6hr; E11_BL - E11_24hr
A0A669CSQ8	6.3759	3.6952e-05	4.4324	0.0020783	E11_BL - E11_10min; E11_BL - E11_30min; E11_BL - E11_1hr; E11_BL - E11_3hr; E11_BL - E11_6hr; E11_BL - E11_24hr
I3K393	6.3739	3.7075e-05	4.4309	0.0020783	E11_BL - E11_10min; E11_BL - E11_30min; E11_BL - E11_1hr; E11_BL - E11_3hr; E11_BL - E11_6hr; E11_BL - E11_24hr
I3KBM4	6.348	3.8658e-05	4.4128	0.0020783	E11_BL - E11_10min; E11_BL - E11_30min; E11_BL - E11_1hr; E11_BL - E11_3hr; E11_BL - E11_6hr; E11_BL - E11_24hr
A0A669EPL7	6.3461	3.8775e-05	4.4114	0.0020783	E11_BL - E11_10min; E11_BL - E11_30min; E11_BL - E11_1hr; E11_BL - E11_3hr; E11_BL - E11_6hr; E11_BL - E11_24hr
I3IWF7	6.3451	3.8836e-05	4.4108	0.0020783	E11_BL - E11_10min; E11_BL - E11_30min; E11_BL - E11_1hr; E11_BL - E11_3hr; E11_BL - E11_6hr; E11_BL - E11_24hr
A0A669DFZ1	6.2451	4.5655e-05	4.3405	0.0023714	E11_BL - E11_10min; E11_BL - E11_30min; E11_BL - E11_1hr; E11_BL - E11_3hr; E11_BL - E11_6hr; E11_BL - E11_24hr
A0A669D3S9	6.1697	5.1606e-05	4.2873	0.0026039	E11_BL - E11_10min; E11_BL - E11_30min; E11_BL - E11_1hr; E11_BL - E11_3hr; E11_BL - E11_6hr; E11_BL - E11_24hr
I3IW83	6.1374	5.4391e-05	4.2645	0.0026682	E11_BL - E11_10min; E11_BL - E11_30min; E11_BL - E11_1hr; E11_BL - E11_3hr; E11_BL - E11_6hr; E11_BL - E11_24hr
A0A669D6L6	6.0075	6.7272e-05	4.1722	0.0032109	E11_BL - E11_10min; E11_BL - E11_30min; E11_BL - E11_1hr; E11_BL - E11_6hr; E11_BL - E11_24hr; E11_3hr - E11_10min; E11_3hr - E11_30min; E11_3hr - E11_6hr; E11_3hr - E11_24hr
I3JR11	5.9564	7.3153e-05	4.1358	0.0033997	E11_BL - E11_10min; E11_BL - E11_30min; E11_BL - E11_1hr; E11_BL - E11_3hr; E11_BL - E11_6hr; E11_BL - E11_24hr
A0A669C028	5.8255	9.0789e-05	4.042	0.0041111	E11_BL - E11_30min; E11_BL - E11_1hr; E11_BL - E11_3hr; E11_BL - E11_6hr; E11_BL - E11_24hr; E11_10min - E11_24hr; E11_30min - E11_24hr; E11_6hr - E11_24hr
A0A669E8K2	5.7991	9.4842e-05	4.023	0.0041873	E11_BL - E11_10min; E11_BL - E11_30min; E11_BL - E11_1hr; E11_BL - E11_3hr; E11_BL - E11_6hr; E11_BL - E11_24hr; E11_10min - E11_3hr; E11_10min - E11_24hr; E11_30min - E11_24hr; E11_6hr - E11_3hr; E11_6hr - E11_24hr
I3JTI2	5.5754	0.00013765	3.8612	0.0059289	E11_BL - E11_30min; E11_BL - E11_1hr; E11_BL - E11_3hr; E11_BL - E11_6hr; E11_BL - E11_24hr; E11_10min - E11_30min; E11_10min - E11_1hr; E11_10min - E11_3hr; E11_10min - E11_6hr; E11_10min - E11_24hr
A0A669D1F5	5.3875	0.0001888	3.724	0.0079387	E11_BL - E11_10min; E11_BL - E11_1hr; E11_BL - E11_3hr; E11_BL - E11_6hr; E11_BL - E11_24hr; E11_30min - E11_24hr; E11_1hr - E11_24hr; E11_6hr - E11_24hr
A0A669ETB5	4.9471	0.00040017	3.3978	0.016435	E11_BL - E11_10min; E11_BL - E11_1hr; E11_BL - E11_3hr; E11_BL - E11_6hr; E11_BL - E11_24hr; E11_10min - E11_24hr; E11_30min - E11_1hr; E11_30min - E11_3hr; E11_30min - E11_24hr
A0A669CQ16	4.8988	0.00043492	3.3616	0.017456	E11_BL - E11_3hr; E11_BL - E11_24hr; E11_10min - E11_30min; E11_10min - E11_3hr; E11_10min - E11_24hr; E11_1hr - E11_30min; E11_1hr - E11_3hr; E11_1hr - E11_6hr; E11_1hr - E11_24hr
A0A669F563	4.7632	0.00055	3.2596	0.021584	E11_BL - E11_10min; E11_BL - E11_30min; E11_BL - E11_3hr; E11_BL - E11_6hr; E11_BL - E11_24hr; E11_1hr - E11_10min; E11_1hr - E11_30min; E11_1hr - E11_6hr; E11_1hr - E11_24hr
I3KV21	4.7155	0.00059749	3.2237	0.022682	E11_BL - E11_10min; E11_BL - E11_30min; E11_1hr - E11_10min; E11_24hr - E11_10min; E11_1hr - E11_30min; E11_24hr - E11_30min; E11_1hr - E11_3hr; E11_1hr - E11_6hr
A0A669CMH4	4.7097	0.00060364	3.2192	0.022682	E11_BL - E11_10min; E11_BL - E11_30min; E11_BL - E11_1hr; E11_BL - E11_3hr; E11_BL - E11_6hr; E11_BL - E11_24hr
I3KKL3	4.6246	0.00070018	3.1548	0.025761	E11_BL - E11_30min; E11_BL - E11_1hr; E11_BL - E11_3hr; E11_BL - E11_6hr; E11_BL - E11_24hr; E11_10min - E11_30min; E11_10min - E11_1hr; E11_10min - E11_3hr; E11_10min - E11_6hr; E11_10min - E11_24hr
I3KP83	4.5371	0.00081599	3.0883	0.029409	E11_BL - E11_10min; E11_BL - E11_30min; E11_BL - E11_1hr; E11_BL - E11_3hr; E11_BL - E11_6hr; E11_BL - E11_24hr
A0A669DSR8	4.4449	0.00095944	3.018	0.033888	E11_BL - E11_10min; E11_BL - E11_30min; E11_BL - E11_3hr; E11_BL - E11_6hr; E11_BL - E11_24hr; E11_1hr - E11_10min; E11_1hr - E11_30min; E11_1hr - E11_3hr; E11_1hr - E11_6hr; E11_1hr - E11_24hr
A0A669D8W5	4.3989	0.0010404	2.9828	0.036026	E11_BL - E11_10min; E11_BL - E11_30min; E11_BL - E11_1hr; E11_BL - E11_3hr; E11_BL - E11_6hr; E11_BL - E11_24hr
A0A669EWS9	4.3689	0.001097	2.9598	0.037255	E11_BL - E11_10min; E11_BL - E11_1hr; E11_BL - E11_3hr; E11_BL - E11_24hr; E11_30min - E11_24hr; E11_6hr - E11_3hr; E11_6hr - E11_24hr
A0A669E1D5	4.2285	0.0014062	2.852	0.046855	E11_BL - E11_10min; E11_BL - E11_1hr; E11_BL - E11_3hr; E11_BL - E11_6hr; E11_BL - E11_24hr
