# Supplementary material for: Proteomic and phosphoproteomic profilings reveal distinct cellular responses during Tilapinevirus tilapiae entry and replication
Source: PeerJ. 2025 Feb 21;13:e18923. doi: 10.7717/peerj.18923 (PMC11849505; doi:10.7717/peerj.18923)
Supplement: Supplemental Information 4 [file peerj-13-18923-s004.xlsx]

## Sheet: Sheet 1
	f.value	p.value	-log10(p)	FDR	Fisher's LSD
A0A669FA79	29.483	1.1958e-15	14.922	1.9982e-12	RHTiB_BL - RHTiB_10min; RHTiB_BL - RHTiB_30min; RHTiB_BL - RHTiB_1hr; RHTiB_BL - RHTiB_3hr; RHTiB_BL - RHTiB_6hr; RHTiB_BL - RHTiB_24hr
A0A669CF08	27.882	3.7899e-15	14.421	3.1665e-12	RHTiB_BL - RHTiB_10min; RHTiB_BL - RHTiB_30min; RHTiB_BL - RHTiB_1hr; RHTiB_BL - RHTiB_3hr; RHTiB_BL - RHTiB_6hr; RHTiB_BL - RHTiB_24hr; RHTiB_10min - RHTiB_30min; RHTiB_10min - RHTiB_3hr; RHTiB_10min - RHTiB_6hr; RHTiB_24hr - RHTiB_6hr
A0A669D5Z8	26.009	1.5553e-14	13.808	8.663e-12	RHTiB_BL - RHTiB_10min; RHTiB_BL - RHTiB_30min; RHTiB_BL - RHTiB_1hr; RHTiB_BL - RHTiB_3hr; RHTiB_BL - RHTiB_6hr; RHTiB_BL - RHTiB_24hr
A0A669CFY3	21.435	6.7879e-13	12.168	2.8357e-10	RHTiB_BL - RHTiB_10min; RHTiB_BL - RHTiB_30min; RHTiB_BL - RHTiB_1hr; RHTiB_BL - RHTiB_3hr; RHTiB_BL - RHTiB_6hr; RHTiB_BL - RHTiB_24hr; RHTiB_10min - RHTiB_6hr
I3JGZ7	20.133	2.1946e-12	11.659	7.3343e-10	RHTiB_BL - RHTiB_10min; RHTiB_BL - RHTiB_30min; RHTiB_BL - RHTiB_1hr; RHTiB_BL - RHTiB_3hr; RHTiB_BL - RHTiB_6hr; RHTiB_BL - RHTiB_24hr
A0A669CUF4	19.623	3.5228e-12	11.453	9.811e-10	RHTiB_BL - RHTiB_10min; RHTiB_BL - RHTiB_30min; RHTiB_BL - RHTiB_1hr; RHTiB_BL - RHTiB_3hr; RHTiB_BL - RHTiB_6hr; RHTiB_BL - RHTiB_24hr; RHTiB_24hr - RHTiB_6hr
A0A669F2I5	14.942	4.0924e-10	9.388	8.6271e-08	RHTiB_BL - RHTiB_10min; RHTiB_BL - RHTiB_30min; RHTiB_BL - RHTiB_1hr; RHTiB_BL - RHTiB_3hr; RHTiB_BL - RHTiB_6hr; RHTiB_BL - RHTiB_24hr
A0A669DH77	14.893	4.321e-10	9.3644	8.6271e-08	RHTiB_BL - RHTiB_10min; RHTiB_BL - RHTiB_30min; RHTiB_BL - RHTiB_1hr; RHTiB_BL - RHTiB_3hr; RHTiB_BL - RHTiB_6hr; RHTiB_BL - RHTiB_24hr; RHTiB_24hr - RHTiB_30min; RHTiB_24hr - RHTiB_1hr; RHTiB_24hr - RHTiB_3hr; RHTiB_24hr - RHTiB_6hr
A0A669CN37	14.827	4.6466e-10	9.3329	8.6271e-08	RHTiB_BL - RHTiB_10min; RHTiB_BL - RHTiB_30min; RHTiB_BL - RHTiB_1hr; RHTiB_BL - RHTiB_3hr; RHTiB_BL - RHTiB_6hr; RHTiB_BL - RHTiB_24hr; RHTiB_10min - RHTiB_6hr; RHTiB_24hr - RHTiB_3hr; RHTiB_24hr - RHTiB_6hr
I3KV49	13.979	1.2102e-09	8.9172	2.0222e-07	RHTiB_BL - RHTiB_10min; RHTiB_BL - RHTiB_30min; RHTiB_BL - RHTiB_1hr; RHTiB_BL - RHTiB_3hr; RHTiB_BL - RHTiB_6hr; RHTiB_BL - RHTiB_24hr; RHTiB_30min - RHTiB_6hr; RHTiB_24hr - RHTiB_1hr; RHTiB_24hr - RHTiB_3hr; RHTiB_24hr - RHTiB_6hr
A0A669CQ16	13.237	2.8704e-09	8.5421	4.3604e-07	RHTiB_BL - RHTiB_10min; RHTiB_BL - RHTiB_30min; RHTiB_BL - RHTiB_1hr; RHTiB_BL - RHTiB_3hr; RHTiB_BL - RHTiB_6hr; RHTiB_BL - RHTiB_24hr; RHTiB_10min - RHTiB_3hr; RHTiB_10min - RHTiB_6hr; RHTiB_24hr - RHTiB_30min; RHTiB_24hr - RHTiB_3hr; RHTiB_24hr - RHTiB_6hr
I3J6Y0	13.074	3.4851e-09	8.4578	4.853e-07	RHTiB_BL - RHTiB_10min; RHTiB_BL - RHTiB_30min; RHTiB_BL - RHTiB_1hr; RHTiB_BL - RHTiB_3hr; RHTiB_BL - RHTiB_6hr; RHTiB_BL - RHTiB_24hr
I3KSC8	12.948	4.0484e-09	8.3927	5.2037e-07	RHTiB_BL - RHTiB_10min; RHTiB_BL - RHTiB_30min; RHTiB_BL - RHTiB_1hr; RHTiB_BL - RHTiB_3hr; RHTiB_BL - RHTiB_6hr; RHTiB_BL - RHTiB_24hr
I3JEZ1	12.668	5.6692e-09	8.2465	6.7666e-07	RHTiB_BL - RHTiB_10min; RHTiB_BL - RHTiB_30min; RHTiB_BL - RHTiB_1hr; RHTiB_BL - RHTiB_3hr; RHTiB_BL - RHTiB_6hr; RHTiB_BL - RHTiB_24hr
A0A669BSA8	12.013	1.266e-08	7.8976	1.4103e-06	RHTiB_BL - RHTiB_10min; RHTiB_BL - RHTiB_30min; RHTiB_BL - RHTiB_1hr; RHTiB_BL - RHTiB_3hr; RHTiB_BL - RHTiB_6hr; RHTiB_BL - RHTiB_24hr; RHTiB_24hr - RHTiB_3hr; RHTiB_24hr - RHTiB_6hr
I3JT09	11.906	1.4458e-08	7.8399	1.51e-06	RHTiB_BL - RHTiB_10min; RHTiB_BL - RHTiB_30min; RHTiB_BL - RHTiB_1hr; RHTiB_BL - RHTiB_3hr; RHTiB_BL - RHTiB_6hr; RHTiB_BL - RHTiB_24hr; RHTiB_3hr - RHTiB_6hr
A0A669BXG9	11.372	2.8392e-08	7.5468	2.7908e-06	RHTiB_BL - RHTiB_10min; RHTiB_BL - RHTiB_30min; RHTiB_BL - RHTiB_1hr; RHTiB_BL - RHTiB_3hr; RHTiB_BL - RHTiB_6hr; RHTiB_BL - RHTiB_24hr; RHTiB_1hr - RHTiB_6hr; RHTiB_24hr - RHTiB_6hr
A0A669DJ50	11.195	3.5631e-08	7.4482	3.1809e-06	RHTiB_BL - RHTiB_10min; RHTiB_BL - RHTiB_30min; RHTiB_BL - RHTiB_1hr; RHTiB_BL - RHTiB_3hr; RHTiB_BL - RHTiB_6hr; RHTiB_BL - RHTiB_24hr
I3IWY3	11.184	3.6168e-08	7.4417	3.1809e-06	RHTiB_BL - RHTiB_10min; RHTiB_BL - RHTiB_30min; RHTiB_BL - RHTiB_1hr; RHTiB_BL - RHTiB_3hr; RHTiB_BL - RHTiB_6hr; RHTiB_BL - RHTiB_24hr
A0A669CQV2	10.986	4.6688e-08	7.3308	3.9008e-06	RHTiB_BL - RHTiB_10min; RHTiB_BL - RHTiB_30min; RHTiB_BL - RHTiB_1hr; RHTiB_BL - RHTiB_3hr; RHTiB_BL - RHTiB_6hr; RHTiB_BL - RHTiB_24hr; RHTiB_10min - RHTiB_6hr; RHTiB_10min - RHTiB_24hr; RHTiB_3hr - RHTiB_30min; RHTiB_3hr - RHTiB_1hr; RHTiB_3hr - RHTiB_6hr; RHTiB_3hr - RHTiB_24hr
A0A669E3G1	10.734	6.4946e-08	7.1874	5.1679e-06	RHTiB_BL - RHTiB_1hr; RHTiB_BL - RHTiB_3hr; RHTiB_BL - RHTiB_6hr; RHTiB_BL - RHTiB_24hr; RHTiB_10min - RHTiB_30min; RHTiB_10min - RHTiB_1hr; RHTiB_10min - RHTiB_3hr; RHTiB_10min - RHTiB_6hr; RHTiB_10min - RHTiB_24hr; RHTiB_30min - RHTiB_1hr; RHTiB_30min - RHTiB_3hr; RHTiB_30min - RHTiB_6hr; RHTiB_30min - RHTiB_24hr
A0A669F0E5	10.259	1.2207e-07	6.9134	9.272e-06	RHTiB_BL - RHTiB_10min; RHTiB_BL - RHTiB_30min; RHTiB_BL - RHTiB_1hr; RHTiB_BL - RHTiB_3hr; RHTiB_BL - RHTiB_6hr; RHTiB_BL - RHTiB_24hr
I3JUB1	10.086	1.5413e-07	6.8121	1.1198e-05	RHTiB_BL - RHTiB_1hr; RHTiB_BL - RHTiB_3hr; RHTiB_BL - RHTiB_6hr; RHTiB_BL - RHTiB_24hr; RHTiB_10min - RHTiB_30min; RHTiB_10min - RHTiB_1hr; RHTiB_10min - RHTiB_3hr; RHTiB_10min - RHTiB_6hr; RHTiB_10min - RHTiB_24hr; RHTiB_30min - RHTiB_3hr; RHTiB_30min - RHTiB_6hr; RHTiB_30min - RHTiB_24hr; RHTiB_1hr - RHTiB_24hr
I3KQ30	9.9224	1.9235e-07	6.7159	1.3392e-05	RHTiB_BL - RHTiB_10min; RHTiB_BL - RHTiB_30min; RHTiB_BL - RHTiB_1hr; RHTiB_BL - RHTiB_3hr; RHTiB_BL - RHTiB_6hr; RHTiB_BL - RHTiB_24hr; RHTiB_24hr - RHTiB_30min; RHTiB_24hr - RHTiB_1hr; RHTiB_24hr - RHTiB_6hr
I3JNG0	9.4812	3.531e-07	6.4521	2.3601e-05	RHTiB_BL - RHTiB_10min; RHTiB_BL - RHTiB_30min; RHTiB_BL - RHTiB_1hr; RHTiB_BL - RHTiB_3hr; RHTiB_BL - RHTiB_6hr; RHTiB_BL - RHTiB_24hr
I3K4R2	9.2784	4.6873e-07	6.3291	3.0125e-05	RHTiB_BL - RHTiB_10min; RHTiB_BL - RHTiB_30min; RHTiB_BL - RHTiB_1hr; RHTiB_BL - RHTiB_3hr; RHTiB_BL - RHTiB_6hr; RHTiB_BL - RHTiB_24hr; RHTiB_24hr - RHTiB_30min; RHTiB_24hr - RHTiB_3hr; RHTiB_24hr - RHTiB_6hr
A0A669F9Q3	9.0371	6.59e-07	6.1811	4.0785e-05	RHTiB_10min - RHTiB_BL; RHTiB_10min - RHTiB_30min; RHTiB_10min - RHTiB_1hr; RHTiB_10min - RHTiB_3hr; RHTiB_10min - RHTiB_6hr; RHTiB_10min - RHTiB_24hr
A0A669DA65	8.9138	7.8538e-07	6.1049	4.687e-05	RHTiB_BL - RHTiB_10min; RHTiB_BL - RHTiB_30min; RHTiB_BL - RHTiB_1hr; RHTiB_BL - RHTiB_3hr; RHTiB_BL - RHTiB_6hr; RHTiB_BL - RHTiB_24hr; RHTiB_30min - RHTiB_10min; RHTiB_1hr - RHTiB_10min; RHTiB_30min - RHTiB_3hr; RHTiB_30min - RHTiB_6hr; RHTiB_30min - RHTiB_24hr; RHTiB_1hr - RHTiB_3hr; RHTiB_1hr - RHTiB_6hr; RHTiB_1hr - RHTiB_24hr
I3JQR3	8.1036	2.5539e-06	5.5928	0.00014716	RHTiB_BL - RHTiB_10min; RHTiB_BL - RHTiB_30min; RHTiB_BL - RHTiB_1hr; RHTiB_BL - RHTiB_3hr; RHTiB_BL - RHTiB_6hr; RHTiB_BL - RHTiB_24hr
I3K3J4	7.9864	3.0402e-06	5.5171	0.00016934	RHTiB_10min - RHTiB_BL; RHTiB_BL - RHTiB_1hr; RHTiB_BL - RHTiB_3hr; RHTiB_10min - RHTiB_30min; RHTiB_10min - RHTiB_1hr; RHTiB_10min - RHTiB_3hr; RHTiB_10min - RHTiB_6hr; RHTiB_10min - RHTiB_24hr; RHTiB_30min - RHTiB_1hr; RHTiB_30min - RHTiB_3hr; RHTiB_30min - RHTiB_24hr
A0A669F2Q6	7.8208	3.8959e-06	5.4094	0.00021	RHTiB_BL - RHTiB_10min; RHTiB_BL - RHTiB_30min; RHTiB_BL - RHTiB_1hr; RHTiB_BL - RHTiB_3hr; RHTiB_BL - RHTiB_6hr; RHTiB_BL - RHTiB_24hr
A0A669BQI1	7.5324	6.0289e-06	5.2198	0.00031482	RHTiB_BL - RHTiB_10min; RHTiB_BL - RHTiB_30min; RHTiB_BL - RHTiB_1hr; RHTiB_BL - RHTiB_3hr; RHTiB_BL - RHTiB_6hr; RHTiB_BL - RHTiB_24hr
I3JS45	7.4387	6.9568e-06	5.1576	0.00035227	RHTiB_10min - RHTiB_BL; RHTiB_BL - RHTiB_1hr; RHTiB_BL - RHTiB_3hr; RHTiB_10min - RHTiB_30min; RHTiB_10min - RHTiB_1hr; RHTiB_10min - RHTiB_3hr; RHTiB_10min - RHTiB_6hr; RHTiB_10min - RHTiB_24hr; RHTiB_30min - RHTiB_1hr; RHTiB_30min - RHTiB_3hr; RHTiB_6hr - RHTiB_1hr; RHTiB_24hr - RHTiB_1hr; RHTiB_6hr - 5
A0A669B0P9	7.4056	7.3187e-06	5.1356	0.00035969	RHTiB_BL - RHTiB_10min; RHTiB_BL - RHTiB_30min; RHTiB_BL - RHTiB_1hr; RHTiB_BL - RHTiB_3hr; RHTiB_BL - RHTiB_6hr; RHTiB_BL - RHTiB_24hr; RHTiB_10min - RHTiB_30min; RHTiB_10min - RHTiB_1hr; RHTiB_10min - 5
A0A669DUN2	6.3155	4.0739e-05	4.39	0.001945	RHTiB_BL - RHTiB_10min; RHTiB_BL - RHTiB_30min; RHTiB_BL - RHTiB_1hr; RHTiB_BL - RHTiB_3hr; RHTiB_BL - RHTiB_6hr; RHTiB_BL - RHTiB_24hr
I3JN92	6.2498	4.5308e-05	4.3438	0.0021031	RHTiB_BL - RHTiB_10min; RHTiB_BL - RHTiB_30min; RHTiB_BL - RHTiB_1hr; RHTiB_BL - RHTiB_3hr; RHTiB_BL - RHTiB_6hr; RHTiB_BL - RHTiB_24hr
A0A669C5Y3	5.8788	8.3138e-05	4.0802	0.0037547	RHTiB_BL - RHTiB_10min; RHTiB_BL - RHTiB_30min; RHTiB_BL - RHTiB_1hr; RHTiB_BL - RHTiB_3hr; RHTiB_BL - RHTiB_6hr; RHTiB_BL - RHTiB_24hr
I3KU43	5.858	8.6039e-05	4.0653	0.0037835	RHTiB_BL - RHTiB_10min; RHTiB_BL - RHTiB_30min; RHTiB_BL - RHTiB_1hr; RHTiB_BL - RHTiB_3hr; RHTiB_BL - RHTiB_6hr; RHTiB_BL - RHTiB_24hr
A0A669EZN6	5.781	9.7732e-05	4.01	0.0041874	RHTiB_BL - RHTiB_10min; RHTiB_BL - RHTiB_30min; RHTiB_BL - RHTiB_1hr; RHTiB_BL - RHTiB_3hr; RHTiB_BL - RHTiB_6hr; RHTiB_BL - RHTiB_24hr
I3KPP9	5.6512	0.00012129	3.9162	0.0050668	RHTiB_BL - RHTiB_10min; RHTiB_BL - RHTiB_30min; RHTiB_BL - RHTiB_1hr; RHTiB_BL - RHTiB_3hr; RHTiB_BL - RHTiB_6hr; RHTiB_BL - RHTiB_24hr
A0A669D6T1	5.5936	0.00013353	3.8744	0.0053225	RHTiB_10min - RHTiB_BL; RHTiB_3hr - RHTiB_BL; RHTiB_10min - RHTiB_30min; RHTiB_10min - RHTiB_1hr; RHTiB_10min - RHTiB_6hr; RHTiB_10min - RHTiB_24hr; RHTiB_3hr - RHTiB_30min; RHTiB_3hr - RHTiB_1hr; RHTiB_3hr - RHTiB_6hr; RHTiB_3hr - RHTiB_24hr
I3J351	5.5925	0.00013378	3.8736	0.0053225	RHTiB_BL - RHTiB_10min; RHTiB_BL - RHTiB_30min; RHTiB_BL - RHTiB_1hr; RHTiB_BL - RHTiB_3hr; RHTiB_BL - RHTiB_6hr; RHTiB_BL - RHTiB_24hr; RHTiB_10min - RHTiB_6hr; RHTiB_10min - RHTiB_24hr
A0A669CZJ1	5.5744	0.00013788	3.8605	0.005358	RHTiB_10min - RHTiB_BL; RHTiB_30min - RHTiB_BL; RHTiB_6hr - RHTiB_BL; RHTiB_24hr - RHTiB_BL; RHTiB_10min - RHTiB_1hr; RHTiB_10min - RHTiB_3hr; RHTiB_30min - RHTiB_1hr; RHTiB_6hr - RHTiB_1hr; RHTiB_24hr - 4
A0A669CLY5	5.5384	0.00014647	3.8343	0.0055624	RHTiB_10min - RHTiB_BL; RHTiB_10min - RHTiB_30min; RHTiB_10min - RHTiB_1hr; RHTiB_10min - RHTiB_3hr; RHTiB_10min - RHTiB_6hr; RHTiB_10min - RHTiB_24hr; RHTiB_6hr - RHTiB_1hr; RHTiB_6hr - 5
I3JS28	5.4542	0.00016871	3.7729	0.0062647	RHTiB_10min - RHTiB_BL; RHTiB_BL - RHTiB_1hr; RHTiB_10min - RHTiB_30min; RHTiB_10min - RHTiB_1hr; RHTiB_10min - RHTiB_3hr; RHTiB_10min - RHTiB_6hr; RHTiB_10min - RHTiB_24hr
I3IZK9	5.0793	0.0003189	3.4964	0.011584	RHTiB_BL - RHTiB_10min; RHTiB_BL - RHTiB_30min; RHTiB_BL - RHTiB_1hr; RHTiB_BL - RHTiB_3hr; RHTiB_BL - RHTiB_6hr; RHTiB_BL - RHTiB_24hr
A0A669CWD3	5.0648	0.00032689	3.4856	0.011622	RHTiB_10min - RHTiB_BL; RHTiB_10min - RHTiB_30min; RHTiB_10min - RHTiB_1hr; RHTiB_10min - RHTiB_3hr; RHTiB_10min - RHTiB_6hr; RHTiB_10min - RHTiB_24hr
A0A669DY36	4.9103	0.00042635	3.3702	0.014842	RHTiB_BL - RHTiB_10min; RHTiB_BL - RHTiB_30min; RHTiB_BL - RHTiB_1hr; RHTiB_BL - RHTiB_3hr; RHTiB_BL - RHTiB_6hr; RHTiB_BL - RHTiB_24hr
A0A669BG50	4.8403	0.0004812	3.3177	0.01641	RHTiB_BL - RHTiB_30min; RHTiB_BL - RHTiB_1hr; RHTiB_BL - RHTiB_3hr; RHTiB_BL - RHTiB_6hr; RHTiB_BL - RHTiB_24hr; RHTiB_10min - RHTiB_30min; RHTiB_10min - RHTiB_1hr; RHTiB_10min - RHTiB_3hr; RHTiB_10min - RHTiB_6hr; RHTiB_10min - RHTiB_24hr
I3KYM8	4.7306	0.00058206	3.235	0.019415	RHTiB_BL - RHTiB_30min; RHTiB_BL - RHTiB_1hr; RHTiB_BL - RHTiB_3hr; RHTiB_BL - RHTiB_6hr; RHTiB_BL - RHTiB_24hr; RHTiB_10min - RHTiB_30min; RHTiB_10min - RHTiB_6hr; RHTiB_3hr - RHTiB_30min; RHTiB_3hr - RHTiB_6hr
A0A669E3W3	4.7203	0.00059256	3.2273	0.019415	RHTiB_BL - RHTiB_10min; RHTiB_BL - RHTiB_30min; RHTiB_BL - RHTiB_1hr; RHTiB_BL - RHTiB_3hr; RHTiB_BL - RHTiB_6hr; RHTiB_BL - RHTiB_24hr
A0A669DW65	4.6629	0.00065483	3.1839	0.021043	RHTiB_10min - RHTiB_BL; RHTiB_30min - RHTiB_BL; RHTiB_1hr - RHTiB_BL; RHTiB_3hr - RHTiB_BL; RHTiB_6hr - RHTiB_BL; RHTiB_24hr - 1
I3J833	4.6095	0.00071889	3.1433	0.022604	RHTiB_BL - RHTiB_10min; RHTiB_BL - RHTiB_30min; RHTiB_BL - RHTiB_1hr; RHTiB_BL - RHTiB_3hr; RHTiB_BL - RHTiB_6hr; RHTiB_BL - RHTiB_24hr
A0A669C7N8	4.6003	0.00073046	3.1364	0.022604	RHTiB_BL - RHTiB_10min; RHTiB_BL - RHTiB_1hr; RHTiB_BL - RHTiB_3hr; RHTiB_BL - RHTiB_6hr; RHTiB_BL - RHTiB_24hr; RHTiB_30min - RHTiB_10min; RHTiB_30min - RHTiB_3hr; RHTiB_30min - RHTiB_6hr; RHTiB_30min - RHTiB_24hr
A0A669CN06	4.5694	0.00077112	3.1129	0.023428	RHTiB_6hr - RHTiB_BL; RHTiB_6hr - RHTiB_10min; RHTiB_6hr - RHTiB_30min; RHTiB_6hr - RHTiB_1hr; RHTiB_6hr - RHTiB_3hr; RHTiB_6hr - RHTiB_24hr
A0A669F709	4.3574	0.0011194	2.951	0.033403	RHTiB_10min - RHTiB_BL; RHTiB_10min - RHTiB_30min; RHTiB_10min - RHTiB_1hr; RHTiB_10min - RHTiB_3hr; RHTiB_10min - RHTiB_6hr; RHTiB_10min - RHTiB_24hr
A0A669CXE6	4.2133	0.0014448	2.8402	0.034445	RHTiB_6hr - RHTiB_BL; RHTiB_6hr - RHTiB_10min; RHTiB_6hr - RHTiB_30min; RHTiB_6hr - RHTiB_1hr; RHTiB_6hr - RHTiB_3hr; RHTiB_6hr - RHTiB_24hr
A0A669ECN6	4.0721	0.0018577	2.731	0.034445	RHTiB_10min - RHTiB_BL; RHTiB_10min - RHTiB_30min; RHTiB_10min - RHTiB_1hr; RHTiB_10min - RHTiB_3hr; RHTiB_10min - RHTiB_6hr; RHTiB_10min - RHTiB_24hr
I3KXZ4	3.9996	0.0021146	2.6748	0.034445	RHTiB_24hr - RHTiB_BL; RHTiB_24hr - RHTiB_10min; RHTiB_24hr - RHTiB_30min; RHTiB_24hr - RHTiB_1hr; RHTiB_24hr - RHTiB_3hr; RHTiB_24hr - RHTiB_6hr
A0A669DN44	3.9989	0.0021172	2.6742	0.034445	RHTiB_24hr - RHTiB_BL; RHTiB_24hr - RHTiB_10min; RHTiB_24hr - RHTiB_30min; RHTiB_24hr - RHTiB_1hr; RHTiB_24hr - RHTiB_3hr; RHTiB_24hr - RHTiB_6hr
A0A669ESC7	3.9989	0.0021175	2.6742	0.034445	RHTiB_24hr - RHTiB_BL; RHTiB_24hr - RHTiB_10min; RHTiB_24hr - RHTiB_30min; RHTiB_24hr - RHTiB_1hr; RHTiB_24hr - RHTiB_3hr; RHTiB_24hr - RHTiB_6hr
A0A669CYZ5	3.9984	0.0021194	2.6738	0.034445	RHTiB_24hr - RHTiB_BL; RHTiB_24hr - RHTiB_10min; RHTiB_24hr - RHTiB_30min; RHTiB_24hr - RHTiB_1hr; RHTiB_24hr - RHTiB_3hr; RHTiB_24hr - RHTiB_6hr
I3KSS1	3.9983	0.0021196	2.6737	0.034445	RHTiB_24hr - RHTiB_BL; RHTiB_24hr - RHTiB_10min; RHTiB_24hr - RHTiB_30min; RHTiB_24hr - RHTiB_1hr; RHTiB_24hr - RHTiB_3hr; RHTiB_24hr - RHTiB_6hr
A0A669BFA3	3.9979	0.0021211	2.6734	0.034445	RHTiB_6hr - RHTiB_BL; RHTiB_6hr - RHTiB_10min; RHTiB_6hr - RHTiB_30min; RHTiB_6hr - RHTiB_1hr; RHTiB_6hr - RHTiB_3hr; RHTiB_6hr - RHTiB_24hr
I3KCE6	3.9978	0.0021213	2.6734	0.034445	RHTiB_24hr - RHTiB_BL; RHTiB_24hr - RHTiB_10min; RHTiB_24hr - RHTiB_30min; RHTiB_24hr - RHTiB_1hr; RHTiB_24hr - RHTiB_3hr; RHTiB_24hr - RHTiB_6hr
I3IZF4	3.9977	0.002122	2.6733	0.034445	RHTiB_6hr - RHTiB_BL; RHTiB_6hr - RHTiB_10min; RHTiB_6hr - RHTiB_30min; RHTiB_6hr - RHTiB_1hr; RHTiB_6hr - RHTiB_3hr; RHTiB_6hr - RHTiB_24hr
A0A669D9Y9	3.9973	0.0021235	2.6729	0.034445	RHTiB_24hr - RHTiB_BL; RHTiB_24hr - RHTiB_10min; RHTiB_24hr - RHTiB_30min; RHTiB_24hr - RHTiB_1hr; RHTiB_24hr - RHTiB_3hr; RHTiB_24hr - RHTiB_6hr
I3JQI9	3.997	0.0021247	2.6727	0.034445	RHTiB_24hr - RHTiB_BL; RHTiB_24hr - RHTiB_10min; RHTiB_24hr - RHTiB_30min; RHTiB_24hr - RHTiB_1hr; RHTiB_24hr - RHTiB_3hr; RHTiB_24hr - RHTiB_6hr
I3JC57	3.9964	0.0021269	2.6723	0.034445	RHTiB_24hr - RHTiB_BL; RHTiB_24hr - RHTiB_10min; RHTiB_24hr - RHTiB_30min; RHTiB_24hr - RHTiB_1hr; RHTiB_24hr - RHTiB_3hr; RHTiB_24hr - RHTiB_6hr
A0A669B9H7	3.9962	0.0021276	2.6721	0.034445	RHTiB_24hr - RHTiB_BL; RHTiB_24hr - RHTiB_10min; RHTiB_24hr - RHTiB_30min; RHTiB_24hr - RHTiB_1hr; RHTiB_24hr - RHTiB_3hr; RHTiB_24hr - RHTiB_6hr
A0A669B3I8	3.9959	0.0021286	2.6719	0.034445	RHTiB_24hr - RHTiB_BL; RHTiB_24hr - RHTiB_10min; RHTiB_24hr - RHTiB_30min; RHTiB_24hr - RHTiB_1hr; RHTiB_24hr - RHTiB_3hr; RHTiB_24hr - RHTiB_6hr
I3KP31	3.9957	0.0021295	2.6717	0.034445	RHTiB_6hr - RHTiB_BL; RHTiB_6hr - RHTiB_10min; RHTiB_6hr - RHTiB_30min; RHTiB_6hr - RHTiB_1hr; RHTiB_6hr - RHTiB_3hr; RHTiB_6hr - RHTiB_24hr
A0A669CWI0	3.9936	0.0021376	2.6701	0.034445	RHTiB_6hr - RHTiB_BL; RHTiB_6hr - RHTiB_10min; RHTiB_6hr - RHTiB_30min; RHTiB_6hr - RHTiB_1hr; RHTiB_6hr - RHTiB_3hr; RHTiB_6hr - RHTiB_24hr
I3KKR9	3.9932	0.0021391	2.6698	0.034445	RHTiB_24hr - RHTiB_BL; RHTiB_24hr - RHTiB_10min; RHTiB_24hr - RHTiB_30min; RHTiB_24hr - RHTiB_1hr; RHTiB_24hr - RHTiB_3hr; RHTiB_24hr - RHTiB_6hr
I3KCS6	3.9926	0.0021413	2.6693	0.034445	RHTiB_6hr - RHTiB_BL; RHTiB_6hr - RHTiB_10min; RHTiB_6hr - RHTiB_30min; RHTiB_6hr - RHTiB_1hr; RHTiB_6hr - RHTiB_3hr; RHTiB_6hr - RHTiB_24hr
A0A669B759	3.9924	0.0021423	2.6691	0.034445	RHTiB_24hr - RHTiB_BL; RHTiB_24hr - RHTiB_10min; RHTiB_24hr - RHTiB_30min; RHTiB_24hr - RHTiB_1hr; RHTiB_24hr - RHTiB_3hr; RHTiB_24hr - RHTiB_6hr
A0A669DIG8	3.9906	0.0021492	2.6677	0.034445	RHTiB_24hr - RHTiB_BL; RHTiB_24hr - RHTiB_10min; RHTiB_24hr - RHTiB_30min; RHTiB_24hr - RHTiB_1hr; RHTiB_24hr - RHTiB_3hr; RHTiB_24hr - RHTiB_6hr
A0A669BTW4	3.9905	0.0021495	2.6677	0.034445	RHTiB_BL - RHTiB_30min; RHTiB_BL - RHTiB_1hr; RHTiB_BL - RHTiB_6hr; RHTiB_BL - RHTiB_24hr; RHTiB_3hr - RHTiB_30min; RHTiB_3hr - RHTiB_1hr; RHTiB_3hr - RHTiB_6hr; RHTiB_3hr - RHTiB_24hr
I3JRZ7	3.9893	0.002154	2.6668	0.034445	RHTiB_24hr - RHTiB_BL; RHTiB_24hr - RHTiB_10min; RHTiB_24hr - RHTiB_30min; RHTiB_24hr - RHTiB_1hr; RHTiB_24hr - RHTiB_3hr; RHTiB_24hr - RHTiB_6hr
A0A669BCQ3	3.9893	0.0021542	2.6667	0.034445	RHTiB_24hr - RHTiB_BL; RHTiB_24hr - RHTiB_10min; RHTiB_24hr - RHTiB_30min; RHTiB_24hr - RHTiB_1hr; RHTiB_24hr - RHTiB_3hr; RHTiB_24hr - RHTiB_6hr
A0A669BPM4	3.989	0.0021554	2.6665	0.034445	RHTiB_24hr - RHTiB_BL; RHTiB_24hr - RHTiB_10min; RHTiB_24hr - RHTiB_30min; RHTiB_24hr - RHTiB_1hr; RHTiB_24hr - RHTiB_3hr; RHTiB_24hr - RHTiB_6hr
A0A669BPU2	3.9889	0.0021555	2.6664	0.034445	RHTiB_24hr - RHTiB_BL; RHTiB_24hr - RHTiB_10min; RHTiB_24hr - RHTiB_30min; RHTiB_24hr - RHTiB_1hr; RHTiB_24hr - RHTiB_3hr; RHTiB_24hr - RHTiB_6hr
Q49RA9	3.9887	0.0021562	2.6663	0.034445	RHTiB_1hr - RHTiB_BL; RHTiB_1hr - RHTiB_10min; RHTiB_1hr - RHTiB_30min; RHTiB_1hr - RHTiB_3hr; RHTiB_1hr - RHTiB_6hr; RHTiB_1hr - RHTiB_24hr
B1NA45	3.9881	0.0021587	2.6658	0.034445	RHTiB_BL - RHTiB_10min; RHTiB_BL - RHTiB_30min; RHTiB_BL - RHTiB_1hr; RHTiB_BL - RHTiB_3hr; RHTiB_BL - RHTiB_6hr; RHTiB_BL - RHTiB_24hr
I3KNN4	3.9879	0.0021596	2.6656	0.034445	RHTiB_24hr - RHTiB_BL; RHTiB_24hr - RHTiB_10min; RHTiB_24hr - RHTiB_30min; RHTiB_24hr - RHTiB_1hr; RHTiB_24hr - RHTiB_3hr; RHTiB_24hr - RHTiB_6hr
I3JCM5	3.9866	0.0021643	2.6647	0.034445	RHTiB_24hr - RHTiB_BL; RHTiB_24hr - RHTiB_10min; RHTiB_24hr - RHTiB_30min; RHTiB_24hr - RHTiB_1hr; RHTiB_24hr - RHTiB_3hr; RHTiB_24hr - RHTiB_6hr
A0A669BFD1	3.983	0.0021785	2.6618	0.034445	RHTiB_24hr - RHTiB_BL; RHTiB_24hr - RHTiB_10min; RHTiB_24hr - RHTiB_30min; RHTiB_24hr - RHTiB_1hr; RHTiB_24hr - RHTiB_3hr; RHTiB_24hr - RHTiB_6hr
I3KHI4	3.9824	0.0021809	2.6614	0.034445	RHTiB_24hr - RHTiB_BL; RHTiB_24hr - RHTiB_10min; RHTiB_24hr - RHTiB_30min; RHTiB_24hr - RHTiB_1hr; RHTiB_24hr - RHTiB_3hr; RHTiB_24hr - RHTiB_6hr
I3JKR9	3.9822	0.0021815	2.6613	0.034445	RHTiB_24hr - RHTiB_BL; RHTiB_24hr - RHTiB_10min; RHTiB_24hr - RHTiB_30min; RHTiB_24hr - RHTiB_1hr; RHTiB_24hr - RHTiB_3hr; RHTiB_24hr - RHTiB_6hr
A0A669EQU1	3.9744	0.0022122	2.6552	0.034445	RHTiB_24hr - RHTiB_BL; RHTiB_24hr - RHTiB_10min; RHTiB_24hr - RHTiB_30min; RHTiB_24hr - RHTiB_1hr; RHTiB_24hr - RHTiB_3hr; RHTiB_24hr - RHTiB_6hr
I3J7H1	3.9724	0.0022203	2.6536	0.034445	RHTiB_24hr - RHTiB_BL; RHTiB_24hr - RHTiB_10min; RHTiB_24hr - RHTiB_30min; RHTiB_24hr - RHTiB_1hr; RHTiB_24hr - RHTiB_3hr; RHTiB_24hr - RHTiB_6hr
A0A669DZI3	3.9719	0.0022222	2.6532	0.034445	RHTiB_24hr - RHTiB_BL; RHTiB_24hr - RHTiB_10min; RHTiB_24hr - RHTiB_30min; RHTiB_24hr - RHTiB_1hr; RHTiB_24hr - RHTiB_3hr; RHTiB_24hr - RHTiB_6hr
A0A669ES06	3.9715	0.002224	2.6529	0.034445	RHTiB_24hr - RHTiB_BL; RHTiB_24hr - RHTiB_10min; RHTiB_24hr - RHTiB_30min; RHTiB_24hr - RHTiB_1hr; RHTiB_24hr - RHTiB_3hr; RHTiB_24hr - RHTiB_6hr
I3IVQ1	3.9713	0.0022245	2.6528	0.034445	RHTiB_10min - RHTiB_BL; RHTiB_10min - RHTiB_30min; RHTiB_10min - RHTiB_1hr; RHTiB_10min - RHTiB_3hr; RHTiB_10min - RHTiB_6hr; RHTiB_10min - RHTiB_24hr
A0A669F1L0	3.9685	0.0022356	2.6506	0.034445	RHTiB_24hr - RHTiB_BL; RHTiB_24hr - RHTiB_10min; RHTiB_24hr - RHTiB_30min; RHTiB_24hr - RHTiB_1hr; RHTiB_24hr - RHTiB_3hr; RHTiB_24hr - RHTiB_6hr
I3K3G7	3.9668	0.0022428	2.6492	0.034445	RHTiB_24hr - RHTiB_BL; RHTiB_24hr - RHTiB_10min; RHTiB_24hr - RHTiB_30min; RHTiB_24hr - RHTiB_1hr; RHTiB_24hr - RHTiB_3hr; RHTiB_24hr - RHTiB_6hr
I3KPM1	3.9643	0.0022526	2.6473	0.034445	RHTiB_24hr - RHTiB_BL; RHTiB_24hr - RHTiB_10min; RHTiB_24hr - RHTiB_30min; RHTiB_24hr - RHTiB_1hr; RHTiB_24hr - RHTiB_3hr; RHTiB_24hr - RHTiB_6hr
A0A669B1X4	3.9642	0.002253	2.6472	0.034445	RHTiB_10min - RHTiB_BL; RHTiB_10min - RHTiB_30min; RHTiB_10min - RHTiB_1hr; RHTiB_10min - RHTiB_3hr; RHTiB_10min - RHTiB_6hr; RHTiB_10min - RHTiB_24hr
A0A669F231	3.9631	0.0022575	2.6464	0.034445	RHTiB_10min - RHTiB_BL; RHTiB_10min - RHTiB_30min; RHTiB_10min - RHTiB_1hr; RHTiB_10min - RHTiB_3hr; RHTiB_10min - RHTiB_6hr; RHTiB_10min - RHTiB_24hr
A0A669CBG0	3.9625	0.0022599	2.6459	0.034445	RHTiB_24hr - RHTiB_BL; RHTiB_24hr - RHTiB_10min; RHTiB_24hr - RHTiB_30min; RHTiB_24hr - RHTiB_1hr; RHTiB_24hr - RHTiB_3hr; RHTiB_24hr - RHTiB_6hr
I3JTI1	3.9573	0.0022811	2.6419	0.034445	RHTiB_24hr - RHTiB_BL; RHTiB_24hr - RHTiB_10min; RHTiB_24hr - RHTiB_30min; RHTiB_24hr - RHTiB_1hr; RHTiB_24hr - RHTiB_3hr; RHTiB_24hr - RHTiB_6hr
I3JQ41	3.9569	0.0022828	2.6415	0.034445	RHTiB_24hr - RHTiB_BL; RHTiB_24hr - RHTiB_10min; RHTiB_24hr - RHTiB_30min; RHTiB_24hr - RHTiB_1hr; RHTiB_24hr - RHTiB_3hr; RHTiB_24hr - RHTiB_6hr
I3KVU5	3.9562	0.0022855	2.641	0.034445	RHTiB_24hr - RHTiB_BL; RHTiB_24hr - RHTiB_10min; RHTiB_24hr - RHTiB_30min; RHTiB_24hr - RHTiB_1hr; RHTiB_24hr - RHTiB_3hr; RHTiB_24hr - RHTiB_6hr
A0A669DL02	3.9549	0.0022908	2.64	0.034445	RHTiB_24hr - RHTiB_BL; RHTiB_24hr - RHTiB_10min; RHTiB_24hr - RHTiB_30min; RHTiB_24hr - RHTiB_1hr; RHTiB_24hr - RHTiB_3hr; RHTiB_24hr - RHTiB_6hr
I3JUU3	3.9523	0.0023016	2.638	0.034445	RHTiB_1hr - RHTiB_BL; RHTiB_1hr - RHTiB_10min; RHTiB_1hr - RHTiB_30min; RHTiB_1hr - RHTiB_3hr; RHTiB_1hr - RHTiB_6hr; RHTiB_1hr - RHTiB_24hr
A0A669EIA8	3.9509	0.0023073	2.6369	0.034445	RHTiB_24hr - RHTiB_BL; RHTiB_24hr - RHTiB_10min; RHTiB_24hr - RHTiB_30min; RHTiB_24hr - RHTiB_1hr; RHTiB_24hr - RHTiB_3hr; RHTiB_24hr - RHTiB_6hr
A0A669F275	3.9493	0.0023143	2.6356	0.034445	RHTiB_24hr - RHTiB_BL; RHTiB_24hr - RHTiB_10min; RHTiB_24hr - RHTiB_30min; RHTiB_24hr - RHTiB_1hr; RHTiB_24hr - RHTiB_3hr; RHTiB_24hr - RHTiB_6hr
I3IU49	3.9476	0.0023212	2.6343	0.034445	RHTiB_24hr - RHTiB_BL; RHTiB_24hr - RHTiB_10min; RHTiB_24hr - RHTiB_30min; RHTiB_24hr - RHTiB_1hr; RHTiB_24hr - RHTiB_3hr; RHTiB_24hr - RHTiB_6hr
I3JMN2	3.9438	0.0023368	2.6314	0.034445	RHTiB_24hr - RHTiB_BL; RHTiB_24hr - RHTiB_10min; RHTiB_24hr - RHTiB_30min; RHTiB_24hr - RHTiB_1hr; RHTiB_24hr - RHTiB_3hr; RHTiB_24hr - RHTiB_6hr
A0A669B1D9	3.942	0.0023446	2.6299	0.034445	RHTiB_BL - RHTiB_10min; RHTiB_BL - RHTiB_30min; RHTiB_BL - RHTiB_1hr; RHTiB_BL - RHTiB_3hr; RHTiB_BL - RHTiB_6hr; RHTiB_BL - RHTiB_24hr
I3J6C5	3.9418	0.0023453	2.6298	0.034445	RHTiB_24hr - RHTiB_BL; RHTiB_24hr - RHTiB_10min; RHTiB_24hr - RHTiB_30min; RHTiB_24hr - RHTiB_1hr; RHTiB_24hr - RHTiB_3hr; RHTiB_24hr - RHTiB_6hr
A0A669AZC7	3.9381	0.0023611	2.6269	0.034445	RHTiB_3hr - RHTiB_BL; RHTiB_3hr - RHTiB_10min; RHTiB_3hr - RHTiB_30min; RHTiB_3hr - RHTiB_1hr; RHTiB_3hr - RHTiB_6hr; RHTiB_3hr - RHTiB_24hr
I3J2J8	3.9365	0.0023677	2.6257	0.034445	RHTiB_24hr - RHTiB_BL; RHTiB_24hr - RHTiB_10min; RHTiB_24hr - RHTiB_30min; RHTiB_24hr - RHTiB_1hr; RHTiB_24hr - RHTiB_3hr; RHTiB_24hr - RHTiB_6hr
I3K8W0	3.9286	0.0024014	2.6195	0.034445	RHTiB_24hr - RHTiB_BL; RHTiB_24hr - RHTiB_10min; RHTiB_24hr - RHTiB_30min; RHTiB_24hr - RHTiB_1hr; RHTiB_24hr - RHTiB_3hr; RHTiB_24hr - RHTiB_6hr
A0A669EDL0	3.928	0.0024043	2.619	0.034445	RHTiB_BL - RHTiB_10min; RHTiB_BL - RHTiB_30min; RHTiB_BL - RHTiB_1hr; RHTiB_BL - RHTiB_3hr; RHTiB_BL - RHTiB_6hr; RHTiB_BL - RHTiB_24hr
A0A669C7G5	3.9268	0.0024093	2.6181	0.034445	RHTiB_BL - RHTiB_10min; RHTiB_BL - RHTiB_30min; RHTiB_BL - RHTiB_1hr; RHTiB_BL - RHTiB_3hr; RHTiB_BL - RHTiB_6hr; RHTiB_BL - RHTiB_24hr
A0A669DB14	3.9224	0.0024286	2.6146	0.034445	RHTiB_6hr - RHTiB_BL; RHTiB_6hr - RHTiB_10min; RHTiB_6hr - RHTiB_30min; RHTiB_6hr - RHTiB_1hr; RHTiB_6hr - RHTiB_3hr; RHTiB_6hr - RHTiB_24hr
I3J9R0	3.9215	0.0024324	2.614	0.034445	RHTiB_24hr - RHTiB_BL; RHTiB_24hr - RHTiB_10min; RHTiB_24hr - RHTiB_30min; RHTiB_24hr - RHTiB_1hr; RHTiB_24hr - RHTiB_3hr; RHTiB_24hr - RHTiB_6hr
A0A669F5U9	3.9065	0.0024986	2.6023	0.035085	RHTiB_10min - RHTiB_BL; RHTiB_10min - RHTiB_30min; RHTiB_10min - RHTiB_1hr; RHTiB_10min - RHTiB_3hr; RHTiB_10min - RHTiB_6hr; RHTiB_10min - RHTiB_24hr
I3IX58	3.8961	0.002546	2.5941	0.03523	RHTiB_24hr - RHTiB_BL; RHTiB_24hr - RHTiB_10min; RHTiB_24hr - RHTiB_30min; RHTiB_24hr - RHTiB_1hr; RHTiB_24hr - RHTiB_3hr; RHTiB_24hr - RHTiB_6hr
A0A669CK18	3.895	0.002551	2.5933	0.03523	RHTiB_24hr - RHTiB_BL; RHTiB_24hr - RHTiB_10min; RHTiB_24hr - RHTiB_30min; RHTiB_24hr - RHTiB_1hr; RHTiB_24hr - RHTiB_3hr; RHTiB_24hr - RHTiB_6hr
A0A669DKY7	3.8643	0.0026956	2.5693	0.036863	RHTiB_24hr - RHTiB_BL; RHTiB_24hr - RHTiB_10min; RHTiB_24hr - RHTiB_30min; RHTiB_24hr - RHTiB_1hr; RHTiB_24hr - RHTiB_3hr; RHTiB_24hr - RHTiB_6hr
A0A669C1T2	3.8594	0.0027195	2.5655	0.036863	RHTiB_BL - RHTiB_10min; RHTiB_BL - RHTiB_30min; RHTiB_BL - RHTiB_1hr; RHTiB_BL - RHTiB_3hr; RHTiB_BL - RHTiB_6hr; RHTiB_BL - RHTiB_24hr
I3J5R6	3.8561	0.0027355	2.563	0.036863	RHTiB_24hr - RHTiB_BL; RHTiB_24hr - RHTiB_10min; RHTiB_24hr - RHTiB_30min; RHTiB_24hr - RHTiB_1hr; RHTiB_24hr - RHTiB_3hr; RHTiB_24hr - RHTiB_6hr
A0A669DDI3	3.8138	0.0029521	2.5299	0.039277	RHTiB_BL - RHTiB_10min; RHTiB_BL - RHTiB_30min; RHTiB_BL - RHTiB_1hr; RHTiB_BL - RHTiB_3hr; RHTiB_BL - RHTiB_6hr; RHTiB_BL - RHTiB_24hr
A0A669ELH7	3.81	0.0029724	2.5269	0.039277	RHTiB_24hr - RHTiB_BL; RHTiB_24hr - RHTiB_10min; RHTiB_24hr - RHTiB_30min; RHTiB_24hr - RHTiB_1hr; RHTiB_24hr - RHTiB_3hr; RHTiB_24hr - RHTiB_6hr
I3JIB6	3.8076	0.0029852	2.525	0.039277	RHTiB_24hr - RHTiB_BL; RHTiB_24hr - RHTiB_10min; RHTiB_24hr - RHTiB_30min; RHTiB_24hr - RHTiB_1hr; RHTiB_24hr - RHTiB_3hr; RHTiB_24hr - RHTiB_6hr
A0A669EWT0	3.7795	0.0031405	2.503	0.040998	RHTiB_10min - RHTiB_BL; RHTiB_3hr - RHTiB_BL; RHTiB_10min - RHTiB_30min; RHTiB_10min - RHTiB_24hr; RHTiB_3hr - RHTiB_30min; RHTiB_6hr - RHTiB_30min; RHTiB_3hr - RHTiB_1hr; RHTiB_3hr - RHTiB_24hr; RHTiB_6hr - RHTiB_24hr
A0A669EK00	3.7695	0.0031976	2.4952	0.041421	RHTiB_24hr - RHTiB_BL; RHTiB_24hr - RHTiB_10min; RHTiB_24hr - RHTiB_30min; RHTiB_24hr - RHTiB_1hr; RHTiB_24hr - RHTiB_3hr; RHTiB_24hr - RHTiB_6hr
A0A669EUN8	3.7559	0.0032769	2.4845	0.042121	RHTiB_BL - RHTiB_10min; RHTiB_BL - RHTiB_30min; RHTiB_BL - RHTiB_1hr; RHTiB_BL - RHTiB_3hr; RHTiB_BL - RHTiB_6hr; RHTiB_BL - RHTiB_24hr
A0A669CJS8	3.7253	0.0034632	2.4605	0.044175	RHTiB_BL - RHTiB_1hr; RHTiB_BL - RHTiB_24hr; RHTiB_10min - RHTiB_30min; RHTiB_10min - RHTiB_1hr; RHTiB_10min - RHTiB_3hr; RHTiB_10min - RHTiB_6hr; RHTiB_10min - RHTiB_24hr
A0A669DRC1	3.7025	0.0036086	2.4427	0.045681	RHTiB_BL - RHTiB_10min; RHTiB_BL - RHTiB_30min; RHTiB_BL - RHTiB_1hr; RHTiB_BL - RHTiB_3hr; RHTiB_BL - RHTiB_6hr; RHTiB_BL - RHTiB_24hr
A0A669EBH2	3.6861	0.0037169	2.4298	0.046699	RHTiB_BL - RHTiB_10min; RHTiB_BL - RHTiB_30min; RHTiB_BL - RHTiB_1hr; RHTiB_BL - RHTiB_3hr; RHTiB_BL - RHTiB_6hr; RHTiB_BL - RHTiB_24hr
A0A669EZC6	3.6745	0.0037959	2.4207	0.047256	RHTiB_24hr - RHTiB_BL; RHTiB_24hr - RHTiB_10min; RHTiB_24hr - RHTiB_30min; RHTiB_24hr - RHTiB_1hr; RHTiB_24hr - RHTiB_3hr; RHTiB_24hr - RHTiB_6hr
A0A669END4	3.6713	0.0038178	2.4182	0.047256	RHTiB_BL - RHTiB_10min; RHTiB_BL - RHTiB_30min; RHTiB_BL - RHTiB_1hr; RHTiB_BL - RHTiB_3hr; RHTiB_BL - RHTiB_6hr
I3J6T4	3.658	0.0039108	2.4077	0.04805	RHTiB_6hr - RHTiB_BL; RHTiB_6hr - RHTiB_10min; RHTiB_6hr - RHTiB_30min; RHTiB_6hr - RHTiB_1hr; RHTiB_6hr - RHTiB_3hr; RHTiB_6hr - RHTiB_24hr
