# Supplementary material for: Proteomic and phosphoproteomic profilings reveal distinct cellular responses during Tilapinevirus tilapiae entry and replication
Source: PeerJ. 2025 Feb 21;13:e18923. doi: 10.7717/peerj.18923 (PMC11849505; doi:10.7717/peerj.18923)
Supplement: Supplemental Information 5 [file peerj-13-18923-s005.xlsx]

## Sheet: 10 min
anova_posthoc
			f.value	p.value	-log10(p)	FDR	Fisher's LSD
A0A669DW65			62.739	4.6346e-23	22.334	8.1846e-20	E11_BL - E11_10min; E11_BL - E11_30min; E11_BL - E11_1hr; E11_BL - E11_3hr; E11_BL - E11_6hr; E11_BL - E11_24hr
A0A669B0F9			41.812	6.0902e-19	18.215	4.7683e-16	E11_BL - E11_10min; E11_BL - E11_30min; E11_BL - E11_1hr; E11_BL - E11_3hr; E11_BL - E11_6hr; E11_BL - E11_24hr
A0A669BMH6			27.317	5.7559e-15	14.24	1.4521e-12	E11_BL - E11_10min; E11_BL - E11_30min; E11_BL - E11_1hr; E11_BL - E11_3hr; E11_BL - E11_6hr; E11_BL - E11_24hr
I3JAS8			18.637	9.003e-12	11.046	1.5899e-09	E11_BL - E11_10min; E11_BL - E11_30min; E11_BL - E11_1hr; E11_BL - E11_3hr; E11_BL - E11_6hr; E11_BL - E11_24hr
I3KF98			11.102	4.0159e-08	7.3962	5.0097e-06	E11_BL - E11_10min; E11_BL - E11_30min; E11_BL - E11_1hr; E11_BL - E11_3hr; E11_BL - E11_6hr; E11_BL - E11_24hr
A0A669D405			11.058	4.2551e-08	7.3711	5.0097e-06	E11_BL - E11_10min; E11_BL - E11_30min; E11_BL - E11_1hr; E11_BL - E11_3hr; E11_BL - E11_6hr; E11_BL - E11_24hr
A0A669F9W3			9.9905	1.7532e-07	6.7562	1.8846e-05	E11_BL - E11_10min; E11_BL - E11_30min; E11_BL - E11_1hr; E11_BL - E11_3hr; E11_BL - E11_6hr; E11_BL - E11_24hr
I3KYV3			9.6325	2.863e-07	6.5432	2.8089e-05	E11_BL - E11_10min; E11_BL - E11_30min; E11_BL - E11_1hr; E11_BL - E11_3hr; E11_BL - E11_6hr; E11_BL - E11_24hr
A0A669C7N8			7.4078	7.2944e-06	5.137	0.00058554	E11_BL - E11_10min; E11_BL - E11_30min; E11_BL - E11_1hr; E11_BL - E11_3hr; E11_BL - E11_6hr; E11_BL - E11_24hr
A0A669BD97			6.7918	1.9029e-05	4.7206	0.0014611	E11_BL - E11_10min; E11_BL - E11_30min; E11_BL - E11_1hr; E11_BL - E11_3hr; E11_BL - E11_6hr; E11_BL - E11_24hr
A0A669AX96			6.7259	2.1121e-05	4.6753	0.0015541	E11_BL - E11_10min; E11_BL - E11_30min; E11_BL - E11_1hr; E11_BL - E11_3hr; E11_BL - E11_6hr; E11_BL - E11_24hr
A0A669CD39			6.3993	3.5586e-05	4.4487	0.0020783	E11_BL - E11_10min; E11_BL - E11_30min; E11_BL - E11_1hr; E11_BL - E11_3hr; E11_BL - E11_6hr; E11_BL - E11_24hr
A0A669CSQ8			6.3759	3.6952e-05	4.4324	0.0020783	E11_BL - E11_10min; E11_BL - E11_30min; E11_BL - E11_1hr; E11_BL - E11_3hr; E11_BL - E11_6hr; E11_BL - E11_24hr
I3K393			6.3739	3.7075e-05	4.4309	0.0020783	E11_BL - E11_10min; E11_BL - E11_30min; E11_BL - E11_1hr; E11_BL - E11_3hr; E11_BL - E11_6hr; E11_BL - E11_24hr
I3KBM4			6.348	3.8658e-05	4.4128	0.0020783	E11_BL - E11_10min; E11_BL - E11_30min; E11_BL - E11_1hr; E11_BL - E11_3hr; E11_BL - E11_6hr; E11_BL - E11_24hr
A0A669EPL7			6.3461	3.8775e-05	4.4114	0.0020783	E11_BL - E11_10min; E11_BL - E11_30min; E11_BL - E11_1hr; E11_BL - E11_3hr; E11_BL - E11_6hr; E11_BL - E11_24hr
I3IWF7			6.3451	3.8836e-05	4.4108	0.0020783	E11_BL - E11_10min; E11_BL - E11_30min; E11_BL - E11_1hr; E11_BL - E11_3hr; E11_BL - E11_6hr; E11_BL - E11_24hr
A0A669DFZ1			6.2451	4.5655e-05	4.3405	0.0023714	E11_BL - E11_10min; E11_BL - E11_30min; E11_BL - E11_1hr; E11_BL - E11_3hr; E11_BL - E11_6hr; E11_BL - E11_24hr
A0A669D3S9			6.1697	5.1606e-05	4.2873	0.0026039	E11_BL - E11_10min; E11_BL - E11_30min; E11_BL - E11_1hr; E11_BL - E11_3hr; E11_BL - E11_6hr; E11_BL - E11_24hr
I3IW83			6.1374	5.4391e-05	4.2645	0.0026682	E11_BL - E11_10min; E11_BL - E11_30min; E11_BL - E11_1hr; E11_BL - E11_3hr; E11_BL - E11_6hr; E11_BL - E11_24hr
I3JR11			5.9564	7.3153e-05	4.1358	0.0033997	E11_BL - E11_10min; E11_BL - E11_30min; E11_BL - E11_1hr; E11_BL - E11_3hr; E11_BL - E11_6hr; E11_BL - E11_24hr
A0A669CMH4			4.7097	0.00060364	3.2192	0.022682	E11_BL - E11_10min; E11_BL - E11_30min; E11_BL - E11_1hr; E11_BL - E11_3hr; E11_BL - E11_6hr; E11_BL - E11_24hr
I3KP83			4.5371	0.00081599	3.0883	0.029409	E11_BL - E11_10min; E11_BL - E11_30min; E11_BL - E11_1hr; E11_BL - E11_3hr; E11_BL - E11_6hr; E11_BL - E11_24hr
A0A669D8W5			4.3989	0.0010404	2.9828	0.036026	E11_BL - E11_10min; E11_BL - E11_30min; E11_BL - E11_1hr; E11_BL - E11_3hr; E11_BL - E11_6hr; E11_BL - E11_24hr

## Sheet: PP 10 min
anova_posthoc
		f.value	p.value	-log10(p)	FDR	Fisher's LSD
A0A669FA79		29.483	1.1958e-15	14.922	1.9982e-12	E11_BL - E11_10min; E11_BL - E11_30min; E11_BL - E11_1hr; E11_BL - E11_3hr; E11_BL - E11_6hr; E11_BL - E11_24hr
A0A669D5Z8		26.009	1.5553e-14	13.808	8.663e-12	E11_BL - E11_10min; E11_BL - E11_30min; E11_BL - E11_1hr; E11_BL - E11_3hr; E11_BL - E11_6hr; E11_BL - E11_24hr
I3JGZ7		20.133	2.1946e-12	11.659	7.3343e-10	E11_BL - E11_10min; E11_BL - E11_30min; E11_BL - E11_1hr; E11_BL - E11_3hr; E11_BL - E11_6hr; E11_BL - E11_24hr
A0A669F2I5		14.942	4.0924e-10	9.388	8.6271e-08	E11_BL - E11_10min; E11_BL - E11_30min; E11_BL - E11_1hr; E11_BL - E11_3hr; E11_BL - E11_6hr; E11_BL - E11_24hr
I3J6Y0		13.074	3.4851e-09	8.4578	4.853e-07	E11_BL - E11_10min; E11_BL - E11_30min; E11_BL - E11_1hr; E11_BL - E11_3hr; E11_BL - E11_6hr; E11_BL - E11_24hr
I3KSC8		12.948	4.0484e-09	8.3927	5.2037e-07	E11_BL - E11_10min; E11_BL - E11_30min; E11_BL - E11_1hr; E11_BL - E11_3hr; E11_BL - E11_6hr; E11_BL - E11_24hr
I3JEZ1		12.668	5.6692e-09	8.2465	6.7666e-07	E11_BL - E11_10min; E11_BL - E11_30min; E11_BL - E11_1hr; E11_BL - E11_3hr; E11_BL - E11_6hr; E11_BL - E11_24hr
A0A669DJ50		11.195	3.5631e-08	7.4482	3.1809e-06	E11_BL - E11_10min; E11_BL - E11_30min; E11_BL - E11_1hr; E11_BL - E11_3hr; E11_BL - E11_6hr; E11_BL - E11_24hr
I3IWY3		11.184	3.6168e-08	7.4417	3.1809e-06	E11_BL - E11_10min; E11_BL - E11_30min; E11_BL - E11_1hr; E11_BL - E11_3hr; E11_BL - E11_6hr; E11_BL - E11_24hr
A0A669F0E5		10.259	1.2207e-07	6.9134	9.272e-06	E11_BL - E11_10min; E11_BL - E11_30min; E11_BL - E11_1hr; E11_BL - E11_3hr; E11_BL - E11_6hr; E11_BL - E11_24hr
I3JNG0		9.4812	3.531e-07	6.4521	2.3601e-05	E11_BL - E11_10min; E11_BL - E11_30min; E11_BL - E11_1hr; E11_BL - E11_3hr; E11_BL - E11_6hr; E11_BL - E11_24hr
I3JQR3		8.1036	2.5539e-06	5.5928	0.00014716	E11_BL - E11_10min; E11_BL - E11_30min; E11_BL - E11_1hr; E11_BL - E11_3hr; E11_BL - E11_6hr; E11_BL - E11_24hr
A0A669F2Q6		7.8208	3.8959e-06	5.4094	0.00021	E11_BL - E11_10min; E11_BL - E11_30min; E11_BL - E11_1hr; E11_BL - E11_3hr; E11_BL - E11_6hr; E11_BL - E11_24hr
A0A669BQI1		7.5324	6.0289e-06	5.2198	0.00031482	E11_BL - E11_10min; E11_BL - E11_30min; E11_BL - E11_1hr; E11_BL - E11_3hr; E11_BL - E11_6hr; E11_BL - E11_24hr
A0A669DUN2		6.3155	4.0739e-05	4.39	0.001945	E11_BL - E11_10min; E11_BL - E11_30min; E11_BL - E11_1hr; E11_BL - E11_3hr; E11_BL - E11_6hr; E11_BL - E11_24hr
I3JN92		6.2498	4.5308e-05	4.3438	0.0021031	E11_BL - E11_10min; E11_BL - E11_30min; E11_BL - E11_1hr; E11_BL - E11_3hr; E11_BL - E11_6hr; E11_BL - E11_24hr
A0A669C5Y3		5.8788	8.3138e-05	4.0802	0.0037547	E11_BL - E11_10min; E11_BL - E11_30min; E11_BL - E11_1hr; E11_BL - E11_3hr; E11_BL - E11_6hr; E11_BL - E11_24hr
I3KU43		5.858	8.6039e-05	4.0653	0.0037835	E11_BL - E11_10min; E11_BL - E11_30min; E11_BL - E11_1hr; E11_BL - E11_3hr; E11_BL - E11_6hr; E11_BL - E11_24hr
A0A669EZN6		5.781	9.7732e-05	4.01	0.0041874	E11_BL - E11_10min; E11_BL - E11_30min; E11_BL - E11_1hr; E11_BL - E11_3hr; E11_BL - E11_6hr; E11_BL - E11_24hr
I3KPP9		5.6512	0.00012129	3.9162	0.0050668	E11_BL - E11_10min; E11_BL - E11_30min; E11_BL - E11_1hr; E11_BL - E11_3hr; E11_BL - E11_6hr; E11_BL - E11_24hr
I3IZK9		5.0793	0.0003189	3.4964	0.011584	E11_BL - E11_10min; E11_BL - E11_30min; E11_BL - E11_1hr; E11_BL - E11_3hr; E11_BL - E11_6hr; E11_BL - E11_24hr
A0A669DY36		4.9103	0.00042635	3.3702	0.014842	E11_BL - E11_10min; E11_BL - E11_30min; E11_BL - E11_1hr; E11_BL - E11_3hr; E11_BL - E11_6hr; E11_BL - E11_24hr
A0A669E3W3		4.7203	0.00059256	3.2273	0.019415	E11_BL - E11_10min; E11_BL - E11_30min; E11_BL - E11_1hr; E11_BL - E11_3hr; E11_BL - E11_6hr; E11_BL - E11_24hr
I3J833		4.6095	0.00071889	3.1433	0.022604	E11_BL - E11_10min; E11_BL - E11_30min; E11_BL - E11_1hr; E11_BL - E11_3hr; E11_BL - E11_6hr; E11_BL - E11_24hr
B1NA45		3.9881	0.0021587	2.6658	0.034445	E11_BL - E11_10min; E11_BL - E11_30min; E11_BL - E11_1hr; E11_BL - E11_3hr; E11_BL - E11_6hr; E11_BL - E11_24hr
A0A669B1D9		3.942	0.0023446	2.6299	0.034445	E11_BL - E11_10min; E11_BL - E11_30min; E11_BL - E11_1hr; E11_BL - E11_3hr; E11_BL - E11_6hr; E11_BL - E11_24hr
A0A669EDL0		3.928	0.0024043	2.619	0.034445	E11_BL - E11_10min; E11_BL - E11_30min; E11_BL - E11_1hr; E11_BL - E11_3hr; E11_BL - E11_6hr; E11_BL - E11_24hr
A0A669C7G5		3.9268	0.0024093	2.6181	0.034445	E11_BL - E11_10min; E11_BL - E11_30min; E11_BL - E11_1hr; E11_BL - E11_3hr; E11_BL - E11_6hr; E11_BL - E11_24hr
A0A669C1T2		3.8594	0.0027195	2.5655	0.036863	E11_BL - E11_10min; E11_BL - E11_30min; E11_BL - E11_1hr; E11_BL - E11_3hr; E11_BL - E11_6hr; E11_BL - E11_24hr
A0A669DDI3		3.8138	0.0029521	2.5299	0.039277	E11_BL - E11_10min; E11_BL - E11_30min; E11_BL - E11_1hr; E11_BL - E11_3hr; E11_BL - E11_6hr; E11_BL - E11_24hr
A0A669EUN8		3.7559	0.0032769	2.4845	0.042121	E11_BL - E11_10min; E11_BL - E11_30min; E11_BL - E11_1hr; E11_BL - E11_3hr; E11_BL - E11_6hr; E11_BL - E11_24hr
A0A669DRC1		3.7025	0.0036086	2.4427	0.045681	E11_BL - E11_10min; E11_BL - E11_30min; E11_BL - E11_1hr; E11_BL - E11_3hr; E11_BL - E11_6hr; E11_BL - E11_24hr
A0A669EBH2		3.6861	0.0037169	2.4298	0.046699	E11_BL - E11_10min; E11_BL - E11_30min; E11_BL - E11_1hr; E11_BL - E11_3hr; E11_BL - E11_6hr; E11_BL - E11_24hr

## Sheet: 24 h
anova_posthoc
	f.value	p.value	-log10(p)	FDR	Fisher's LSD
A0A669F803	9.9653	1.8142e-07	6.7413	1.8846e-05	E11_24hr - E11_BL; E11_24hr - E11_10min; E11_24hr - E11_30min; E11_24hr - E11_1hr; E11_24hr - E11_3hr; E11_24hr - E11_6hr

## Sheet: PP 24 h
anova_posthoc
	f.value	p.value	-log10(p)	FDR	Fisher's LSD
I3KXZ4	3.9996	0.0021146	2.6748	0.034445	E11_24hr - E11_BL; E11_24hr - E11_10min; E11_24hr - E11_30min; E11_24hr - E11_1hr; E11_24hr - E11_3hr; 7 E11_6hr
A0A669DN44	3.9989	0.0021172	2.6742	0.034445	E11_24hr - E11_BL; E11_24hr - E11_10min; E11_24hr - E11_30min; E11_24hr - E11_1hr; E11_24hr - E11_3hr; 7 E11_6hr
A0A669ESC7	3.9989	0.0021175	2.6742	0.034445	E11_24hr - E11_BL; E11_24hr - E11_10min; E11_24hr - E11_30min; E11_24hr - E11_1hr; E11_24hr - E11_3hr; 7 E11_6hr
A0A669CYZ5	3.9984	0.0021194	2.6738	0.034445	E11_24hr - E11_BL; E11_24hr - E11_10min; E11_24hr - E11_30min; E11_24hr - E11_1hr; E11_24hr - E11_3hr; 7 E11_6hr
I3KSS1	3.9983	0.0021196	2.6737	0.034445	E11_24hr - E11_BL; E11_24hr - E11_10min; E11_24hr - E11_30min; E11_24hr - E11_1hr; E11_24hr - E11_3hr; 7 E11_6hr
I3KCE6	3.9978	0.0021213	2.6734	0.034445	E11_24hr - E11_BL; E11_24hr - E11_10min; E11_24hr - E11_30min; E11_24hr - E11_1hr; E11_24hr - E11_3hr; 7 E11_6hr
A0A669D9Y9	3.9973	0.0021235	2.6729	0.034445	E11_24hr - E11_BL; E11_24hr - E11_10min; E11_24hr - E11_30min; E11_24hr - E11_1hr; E11_24hr - E11_3hr; 7 E11_6hr
I3JQI9	3.997	0.0021247	2.6727	0.034445	E11_24hr - E11_BL; E11_24hr - E11_10min; E11_24hr - E11_30min; E11_24hr - E11_1hr; E11_24hr - E11_3hr; 7 E11_6hr
I3JC57	3.9964	0.0021269	2.6723	0.034445	E11_24hr - E11_BL; E11_24hr - E11_10min; E11_24hr - E11_30min; E11_24hr - E11_1hr; E11_24hr - E11_3hr; 7 E11_6hr
A0A669B9H7	3.9962	0.0021276	2.6721	0.034445	E11_24hr - E11_BL; E11_24hr - E11_10min; E11_24hr - E11_30min; E11_24hr - E11_1hr; E11_24hr - E11_3hr; 7 E11_6hr
A0A669B3I8	3.9959	0.0021286	2.6719	0.034445	E11_24hr - E11_BL; E11_24hr - E11_10min; E11_24hr - E11_30min; E11_24hr - E11_1hr; E11_24hr - E11_3hr; 7 E11_6hr
I3KKR9	3.9932	0.0021391	2.6698	0.034445	E11_24hr - E11_BL; E11_24hr - E11_10min; E11_24hr - E11_30min; E11_24hr - E11_1hr; E11_24hr - E11_3hr; 7 E11_6hr
A0A669B759	3.9924	0.0021423	2.6691	0.034445	E11_24hr - E11_BL; E11_24hr - E11_10min; E11_24hr - E11_30min; E11_24hr - E11_1hr; E11_24hr - E11_3hr; 7 E11_6hr
A0A669DIG8	3.9906	0.0021492	2.6677	0.034445	E11_24hr - E11_BL; E11_24hr - E11_10min; E11_24hr - E11_30min; E11_24hr - E11_1hr; E11_24hr - E11_3hr; 7 E11_6hr
I3JRZ7	3.9893	0.002154	2.6668	0.034445	E11_24hr - E11_BL; E11_24hr - E11_10min; E11_24hr - E11_30min; E11_24hr - E11_1hr; E11_24hr - E11_3hr; 7 E11_6hr
A0A669BCQ3	3.9893	0.0021542	2.6667	0.034445	E11_24hr - E11_BL; E11_24hr - E11_10min; E11_24hr - E11_30min; E11_24hr - E11_1hr; E11_24hr - E11_3hr; 7 E11_6hr
A0A669BPM4	3.989	0.0021554	2.6665	0.034445	E11_24hr - E11_BL; E11_24hr - E11_10min; E11_24hr - E11_30min; E11_24hr - E11_1hr; E11_24hr - E11_3hr; 7 E11_6hr
A0A669BPU2	3.9889	0.0021555	2.6664	0.034445	E11_24hr - E11_BL; E11_24hr - E11_10min; E11_24hr - E11_30min; E11_24hr - E11_1hr; E11_24hr - E11_3hr; 7 E11_6hr
I3KNN4	3.9879	0.0021596	2.6656	0.034445	E11_24hr - E11_BL; E11_24hr - E11_10min; E11_24hr - E11_30min; E11_24hr - E11_1hr; E11_24hr - E11_3hr; 7 E11_6hr
I3JCM5	3.9866	0.0021643	2.6647	0.034445	E11_24hr - E11_BL; E11_24hr - E11_10min; E11_24hr - E11_30min; E11_24hr - E11_1hr; E11_24hr - E11_3hr; 7 E11_6hr
A0A669BFD1	3.983	0.0021785	2.6618	0.034445	E11_24hr - E11_BL; E11_24hr - E11_10min; E11_24hr - E11_30min; E11_24hr - E11_1hr; E11_24hr - E11_3hr; 7 E11_6hr
I3KHI4	3.9824	0.0021809	2.6614	0.034445	E11_24hr - E11_BL; E11_24hr - E11_10min; E11_24hr - E11_30min; E11_24hr - E11_1hr; E11_24hr - E11_3hr; 7 E11_6hr
I3JKR9	3.9822	0.0021815	2.6613	0.034445	E11_24hr - E11_BL; E11_24hr - E11_10min; E11_24hr - E11_30min; E11_24hr - E11_1hr; E11_24hr - E11_3hr; 7 E11_6hr
A0A669EQU1	3.9744	0.0022122	2.6552	0.034445	E11_24hr - E11_BL; E11_24hr - E11_10min; E11_24hr - E11_30min; E11_24hr - E11_1hr; E11_24hr - E11_3hr; 7 E11_6hr
I3J7H1	3.9724	0.0022203	2.6536	0.034445	E11_24hr - E11_BL; E11_24hr - E11_10min; E11_24hr - E11_30min; E11_24hr - E11_1hr; E11_24hr - E11_3hr; 7 E11_6hr
A0A669DZI3	3.9719	0.0022222	2.6532	0.034445	E11_24hr - E11_BL; E11_24hr - E11_10min; E11_24hr - E11_30min; E11_24hr - E11_1hr; E11_24hr - E11_3hr; 7 E11_6hr
A0A669ES06	3.9715	0.002224	2.6529	0.034445	E11_24hr - E11_BL; E11_24hr - E11_10min; E11_24hr - E11_30min; E11_24hr - E11_1hr; E11_24hr - E11_3hr; 7 E11_6hr
A0A669F1L0	3.9685	0.0022356	2.6506	0.034445	E11_24hr - E11_BL; E11_24hr - E11_10min; E11_24hr - E11_30min; E11_24hr - E11_1hr; E11_24hr - E11_3hr; 7 E11_6hr
I3K3G7	3.9668	0.0022428	2.6492	0.034445	E11_24hr - E11_BL; E11_24hr - E11_10min; E11_24hr - E11_30min; E11_24hr - E11_1hr; E11_24hr - E11_3hr; 7 E11_6hr
I3KPM1	3.9643	0.0022526	2.6473	0.034445	E11_24hr - E11_BL; E11_24hr - E11_10min; E11_24hr - E11_30min; E11_24hr - E11_1hr; E11_24hr - E11_3hr; 7 E11_6hr
A0A669CBG0	3.9625	0.0022599	2.6459	0.034445	E11_24hr - E11_BL; E11_24hr - E11_10min; E11_24hr - E11_30min; E11_24hr - E11_1hr; E11_24hr - E11_3hr; 7 E11_6hr
I3JTI1	3.9573	0.0022811	2.6419	0.034445	E11_24hr - E11_BL; E11_24hr - E11_10min; E11_24hr - E11_30min; E11_24hr - E11_1hr; E11_24hr - E11_3hr; 7 E11_6hr
I3JQ41	3.9569	0.0022828	2.6415	0.034445	E11_24hr - E11_BL; E11_24hr - E11_10min; E11_24hr - E11_30min; E11_24hr - E11_1hr; E11_24hr - E11_3hr; 7 E11_6hr
I3KVU5	3.9562	0.0022855	2.641	0.034445	E11_24hr - E11_BL; E11_24hr - E11_10min; E11_24hr - E11_30min; E11_24hr - E11_1hr; E11_24hr - E11_3hr; 7 E11_6hr
A0A669DL02	3.9549	0.0022908	2.64	0.034445	E11_24hr - E11_BL; E11_24hr - E11_10min; E11_24hr - E11_30min; E11_24hr - E11_1hr; E11_24hr - E11_3hr; 7 E11_6hr
A0A669EIA8	3.9509	0.0023073	2.6369	0.034445	E11_24hr - E11_BL; E11_24hr - E11_10min; E11_24hr - E11_30min; E11_24hr - E11_1hr; E11_24hr - E11_3hr; 7 E11_6hr
A0A669F275	3.9493	0.0023143	2.6356	0.034445	E11_24hr - E11_BL; E11_24hr - E11_10min; E11_24hr - E11_30min; E11_24hr - E11_1hr; E11_24hr - E11_3hr; 7 E11_6hr
I3IU49	3.9476	0.0023212	2.6343	0.034445	E11_24hr - E11_BL; E11_24hr - E11_10min; E11_24hr - E11_30min; E11_24hr - E11_1hr; E11_24hr - E11_3hr; 7 E11_6hr
I3JMN2	3.9438	0.0023368	2.6314	0.034445	E11_24hr - E11_BL; E11_24hr - E11_10min; E11_24hr - E11_30min; E11_24hr - E11_1hr; E11_24hr - E11_3hr; 7 E11_6hr
I3J6C5	3.9418	0.0023453	2.6298	0.034445	E11_24hr - E11_BL; E11_24hr - E11_10min; E11_24hr - E11_30min; E11_24hr - E11_1hr; E11_24hr - E11_3hr; 7 E11_6hr
I3J2J8	3.9365	0.0023677	2.6257	0.034445	E11_24hr - E11_BL; E11_24hr - E11_10min; E11_24hr - E11_30min; E11_24hr - E11_1hr; E11_24hr - E11_3hr; 7 E11_6hr
I3K8W0	3.9286	0.0024014	2.6195	0.034445	E11_24hr - E11_BL; E11_24hr - E11_10min; E11_24hr - E11_30min; E11_24hr - E11_1hr; E11_24hr - E11_3hr; 7 E11_6hr
I3J9R0	3.9215	0.0024324	2.614	0.034445	E11_24hr - E11_BL; E11_24hr - E11_10min; E11_24hr - E11_30min; E11_24hr - E11_1hr; E11_24hr - E11_3hr; 7 E11_6hr
I3IX58	3.8961	0.002546	2.5941	0.03523	E11_24hr - E11_BL; E11_24hr - E11_10min; E11_24hr - E11_30min; E11_24hr - E11_1hr; E11_24hr - E11_3hr; 7 E11_6hr
A0A669CK18	3.895	0.002551	2.5933	0.03523	E11_24hr - E11_BL; E11_24hr - E11_10min; E11_24hr - E11_30min; E11_24hr - E11_1hr; E11_24hr - E11_3hr; 7 E11_6hr
A0A669DKY7	3.8643	0.0026956	2.5693	0.036863	E11_24hr - E11_BL; E11_24hr - E11_10min; E11_24hr - E11_30min; E11_24hr - E11_1hr; E11_24hr - E11_3hr; 7 E11_6hr
I3J5R6	3.8561	0.0027355	2.563	0.036863	E11_24hr - E11_BL; E11_24hr - E11_10min; E11_24hr - E11_30min; E11_24hr - E11_1hr; E11_24hr - E11_3hr; 7 E11_6hr
A0A669ELH7	3.81	0.0029724	2.5269	0.039277	E11_24hr - E11_BL; E11_24hr - E11_10min; E11_24hr - E11_30min; E11_24hr - E11_1hr; E11_24hr - E11_3hr; 7 E11_6hr
I3JIB6	3.8076	0.0029852	2.525	0.039277	E11_24hr - E11_BL; E11_24hr - E11_10min; E11_24hr - E11_30min; E11_24hr - E11_1hr; E11_24hr - E11_3hr; 7 E11_6hr
A0A669EK00	3.7695	0.0031976	2.4952	0.041421	E11_24hr - E11_BL; E11_24hr - E11_10min; E11_24hr - E11_30min; E11_24hr - E11_1hr; E11_24hr - E11_3hr; 7 E11_6hr
A0A669EZC6	3.6745	0.0037959	2.4207	0.047256	E11_24hr - E11_BL; E11_24hr - E11_10min; E11_24hr - E11_30min; E11_24hr - E11_1hr; E11_24hr - E11_3hr; 7 E11_6hr
