# Supplementary material for: Proteomic and phosphoproteomic profilings reveal distinct cellular responses during Tilapinevirus tilapiae entry and replication
Source: PeerJ. 2025 Feb 21;13:e18923. doi: 10.7717/peerj.18923 (PMC11849505; doi:10.7717/peerj.18923)
Supplement: Supplemental Information 6 [file peerj-13-18923-s006.xlsx]

## Sheet: 10 min
KeGG E11_10_min
Enrichment FDR	nGenes	Pathway Genes	Fold Enrichment	Pathway	URL	Genes
1.09845e-14	12	79	42.7492	RNA degradation	http://www.genome.jp/kegg-bin/show_pathway?hsa03018	EXOSC7 EXOSC5 DIS3 EXOSC3 EXOSC8 EXOSC9 EXOSC2 EXOSC1 EXOSC10 EXOSC4 C1D EXOSC6
8.00752e-10	11	159	19.4701	Necroptosis	http://www.genome.jp/kegg-bin/show_pathway?hsa04217	CASP8 TNFRSF1A JAK2 STAT1 STAT5A TRAF2 RIPK1 CASP1 FADD STAT3 STAT5B
2.56995e-08	10	171	16.458	Influenza A	http://www.genome.jp/kegg-bin/show_pathway?hsa05164	CASP8 TNFRSF1A XPO1 JAK2 STAT1 CALCOCO2 CASP1 FADD CIITA SOCS3
7.6418e-08	10	197	14.2859	Pathogenic Escherichia coli infection	http://www.genome.jp/kegg-bin/show_pathway?hsa05130	CASP8 TNFRSF1A RHOA TRAF2 RIPK1 CASP1 RPS3 FADD PTPN11 ARHGEF12
1.55729e-07	9	162	15.6351	JAK-STAT signaling pathway	http://www.genome.jp/kegg-bin/show_pathway?hsa04630	JAK2 GHR STAT1 STAT5A STAT3 STAT5B PTPN11 SOCS3 SOCS1
1.55729e-07	7	70	28.1432	Prolactin signaling pathway	http://www.genome.jp/kegg-bin/show_pathway?hsa04917	JAK2 STAT1 STAT5A STAT3 STAT5B SOCS3 SOCS1
2.1803e-07	8	119	18.9198	Growth hormone synthesis, secretion and action	http://www.genome.jp/kegg-bin/show_pathway?hsa04935	JAK2 GHR STAT1 STAT5A STAT3 STAT5B SOCS3 SOCS1
1.66708e-06	8	157	14.3405	Hepatitis C	http://www.genome.jp/kegg-bin/show_pathway?hsa05160	CASP8 TNFRSF1A STAT1 TRAF2 RIPK1 FADD STAT3 SOCS3
1.91197e-06	7	108	18.241	Nucleocytoplasmic transport	http://www.genome.jp/kegg-bin/show_pathway?hsa03013	XPO1 RANGAP1 KPNB1 XPO5 RAN RANBP2 NUP62
2.00952e-06	7	112	17.5895	Toxoplasmosis	http://www.genome.jp/kegg-bin/show_pathway?hsa05145	CASP8 TNFRSF1A JAK2 STAT1 STAT3 CIITA SOCS1
2.00952e-06	9	232	10.9176	Coronavirus disease	http://www.genome.jp/kegg-bin/show_pathway?hsa05171	TNFRSF1A RPS5 STAT1 RPS6 CASP1 RPS2 RPS3 STAT3 RPS23
2.09e-06	6	69	24.4724	Adipocytokine signaling pathway	http://www.genome.jp/kegg-bin/show_pathway?hsa04920	TNFRSF1A JAK2 TRAF2 STAT3 PTPN11 SOCS3
2.70071e-06	9	249	10.1722	Salmonella infection	http://www.genome.jp/kegg-bin/show_pathway?hsa05132	CASP8 TNFRSF1A RHOA TRAF2 RIPK1 CASP1 RPS3 FADD PTPRC
2.70071e-06	8	179	12.578	Tuberculosis	http://www.genome.jp/kegg-bin/show_pathway?hsa05152	CASP8 TNFRSF1A RHOA JAK2 STAT1 FADD CIITA ARHGEF12
1.33216e-05	8	224	10.0511	Human cytomegalovirus infection	http://www.genome.jp/kegg-bin/show_pathway?hsa05163	CASP8 TNFRSF1A RHOA TRAF2 RIPK1 FADD STAT3 ARHGEF12
1.61719e-05	7	161	12.2362	Hepatitis B	http://www.genome.jp/kegg-bin/show_pathway?hsa05161	CASP8 JAK2 STAT1 STAT5A FADD STAT3 STAT5B
1.6919e-05	6	104	16.2365	C-type lectin receptor signaling pathway	http://www.genome.jp/kegg-bin/show_pathway?hsa04625	CASP8 RHOA STAT1 CASP1 PTPN11 ARHGEF12
2.24866e-05	11	530	5.84104	Pathways in cancer	http://www.genome.jp/kegg-bin/show_pathway?hsa05200	CASP8 RHOA JAK2 STAT1 STAT5A TRAF2 FADD STAT3 STAT5B ARHGEF12 GSTA1
2.33356e-05	6	112	15.0767	TNF signaling pathway	http://www.genome.jp/kegg-bin/show_pathway?hsa04668	CASP8 TNFRSF1A TRAF2 RIPK1 FADD SOCS3
2.71437e-05	7	180	10.9446	NOD-like receptor signaling pathway	http://www.genome.jp/kegg-bin/show_pathway?hsa04621	CASP8 RHOA STAT1 TRAF2 RIPK1 CASP1 FADD
4.23307e-05	7	194	10.1548	Kaposi sarcoma-associated herpesvirus infection	http://www.genome.jp/kegg-bin/show_pathway?hsa05167	CASP8 TNFRSF1A JAK2 STAT1 TRAF2 FADD STAT3
5.43678e-05	7	203	9.70456	Viral carcinogenesis	http://www.genome.jp/kegg-bin/show_pathway?hsa05203	CASP8 RHOA RANBP1 STAT5A TRAF2 STAT3 STAT5B
5.67304e-05	6	135	12.5081	Apoptosis	http://www.genome.jp/kegg-bin/show_pathway?hsa04210	CASP8 TNFRSF1A TRAF2 RIPK1 ENDOG FADD
6.42618e-05	6	139	12.1481	Measles	http://www.genome.jp/kegg-bin/show_pathway?hsa05162	CASP8 STAT1 STAT5A FADD STAT3 STAT5B
6.74589e-05	7	214	9.20572	Lipid and atherosclerosis	http://www.genome.jp/kegg-bin/show_pathway?hsa05417	CASP8 TNFRSF1A RHOA JAK2 TRAF2 CASP1 STAT3
0.000159165	7	246	8.00823	Shigellosis	http://www.genome.jp/kegg-bin/show_pathway?hsa05131	TNFRSF1A RHOA TRAF2 CALCOCO2 RIPK1 CASP1 U2AF1
0.000160532	5	100	14.0716	AGE-RAGE signaling pathway in diabetic complications	http://www.genome.jp/kegg-bin/show_pathway?hsa04933	JAK2 STAT1 STAT5A STAT3 STAT5B
0.000224168	5	108	13.0293	Th17 cell differentiation	http://www.genome.jp/kegg-bin/show_pathway?hsa04659	JAK2 STAT1 STAT5A STAT3 STAT5B
0.000378193	6	197	8.57154	Chemical carcinogenesis	http://www.genome.jp/kegg-bin/show_pathway?hsa05207	JAK2 KPNB1 STAT5A STAT3 STAT5B GSTA1
0.000419788	6	202	8.35937	Epstein-Barr virus infection	http://www.genome.jp/kegg-bin/show_pathway?hsa05169	CASP8 STAT1 TRAF2 RIPK1 FADD STAT3

## Sheet: 24 h
Enrichment FDR	nGenes	Pathway Genes	Fold Enrichment	Pathway	URL	Genes
6.7153e-16	13	136	41.2671	Path:hsa04210 Apoptosis	http://www.genome.jp/kegg-bin/show_pathway?hsa04210	AKT1 APAF1 BIRC2 BIRC3 XIAP MAP3K5 DIABLO TRAF1 TRAF2 CASP3 CASP7 CASP9 LMNB2
3.65053e-13	8	32	107.929	Path:hsa04215 Apoptosis-multiple species	http://www.genome.jp/kegg-bin/show_pathway?hsa04215	APAF1 BIRC2 BIRC3 XIAP DIABLO CASP3 CASP7 CASP9
4.12473e-12	9	73	53.2254	Path:hsa01524 Platinum drug resistance	http://www.genome.jp/kegg-bin/show_pathway?hsa01524	ERBB2 AKT1 APAF1 BIRC2 BIRC3 XIAP MAP3K5 CASP3 CASP9
2.67851e-11	9	92	42.2332	Path:hsa05222 Small cell lung cancer	http://www.genome.jp/kegg-bin/show_pathway?hsa05222	AKT1 APAF1 BIRC2 BIRC3 XIAP TRAF1 TRAF2 CASP3 CASP9
3.44675e-10	14	530	11.4038	Path:hsa05200 Pathways in cancer	http://www.genome.jp/kegg-bin/show_pathway?hsa05200	ERBB2 AKT1 HIF1A APAF1 BIRC2 BIRC3 XIAP HSP90AA1 TERT TRAF1 TRAF2 CASP3 CASP7 CASP9
4.78137e-09	8	112	30.8369	Path:hsa04668 TNF signaling pathway	http://www.genome.jp/kegg-bin/show_pathway?hsa04668	AKT1 BIRC2 BIRC3 MAP3K5 TRAF1 TRAF2 CASP3 CASP7
3.11725e-08	9	214	18.1563	Path:hsa05417 Lipid and atherosclerosis	http://www.genome.jp/kegg-bin/show_pathway?hsa05417	AKT1 APAF1 HSPA8 HSP90AA1 MAP3K5 TRAF2 CASP3 CASP7 CASP9
1.35478e-07	7	112	26.9823	Path:hsa05145 Toxoplasmosis	http://www.genome.jp/kegg-bin/show_pathway?hsa05145	AKT1 BIRC2 BIRC3 XIAP HSPA8 CASP3 CASP9
1.58101e-07	8	183	18.8729	Path:hsa04621 NOD-like receptor signaling pathway	http://www.genome.jp/kegg-bin/show_pathway?hsa04621	TXNIP SUGT1 BIRC2 BIRC3 XIAP HSP90AA1 TRAF2 TXN
1.55189e-06	8	249	13.8704	Path:hsa05132 Salmonella infection	http://www.genome.jp/kegg-bin/show_pathway?hsa05132	AKT1 BIRC2 BIRC3 HSP90AA1 TRAF2 TXN CASP3 CASP7
2.90192e-06	5	57	37.8699	Path:hsa05134 Legionellosis	http://www.genome.jp/kegg-bin/show_pathway?hsa05134	APAF1 HSPA8 CASP3 CASP7 CASP9
4.59331e-06	8	294	11.7474	Path:hsa04010 MAPK signaling pathway	http://www.genome.jp/kegg-bin/show_pathway?hsa04010	ERBB2 AKT1 MRAS HSPA8 MAP3K5 PPP5C TRAF2 CASP3
3.86034e-05	3	13	99.627	Path:hsa03450 Non-homologous end-joining	http://www.genome.jp/kegg-bin/show_pathway?hsa03450	XRCC6 PRKDC XRCC5
4.61276e-05	5	104	20.7556	Path:hsa04064 NF-kappa B signaling pathway	http://www.genome.jp/kegg-bin/show_pathway?hsa04064	BIRC2 BIRC3 XIAP TRAF1 TRAF2
5.74244e-05	6	194	13.3521	Path:hsa05167 Kaposi sarcoma-associated herpesvirus infection	http://www.genome.jp/kegg-bin/show_pathway?hsa05167	AKT1 HIF1A TRAF2 UBC CASP3 CASP9
0.000165999	5	139	15.5294	Path:hsa05162 Measles	http://www.genome.jp/kegg-bin/show_pathway?hsa05162	AKT1 APAF1 HSPA8 CASP3 CASP9
0.000245232	5	159	13.576	Path:hsa04217 Necroptosis	http://www.genome.jp/kegg-bin/show_pathway?hsa04217	BIRC2 BIRC3 XIAP HSP90AA1 TRAF2
0.000245232	5	155	13.9264	Path:hsa04932 Non-alcoholic fatty liver disease	http://www.genome.jp/kegg-bin/show_pathway?hsa04932	AKT1 MAP3K5 TRAF2 CASP3 CASP7
0.000245232	7	384	7.86984	Path:hsa05010 Alzheimer disease	http://www.genome.jp/kegg-bin/show_pathway?hsa05010	AKT1 APAF1 MAP3K5 TRAF2 CASP3 CASP7 CASP9
0.000245232	6	266	9.73798	Path:hsa05012 Parkinson disease	http://www.genome.jp/kegg-bin/show_pathway?hsa05012	APAF1 MAP3K5 TXN UBC CASP3 CASP9
0.000245232	5	157	13.7489	Path:hsa05160 Hepatitis C	http://www.genome.jp/kegg-bin/show_pathway?hsa05160	AKT1 APAF1 TRAF2 CASP3 CASP9
0.000308367	5	169	12.7727	Path:hsa04141 Protein processing in endoplasmic reticulum	http://www.genome.jp/kegg-bin/show_pathway?hsa04141	HSPA8 HSP90AA1 MAP3K5 P4HB TRAF2
0.000500819	4	97	17.8028	Path:hsa05215 Prostate cancer	http://www.genome.jp/kegg-bin/show_pathway?hsa05215	ERBB2 AKT1 HSP90AA1 CASP9
0.000606867	5	200	10.7929	Path:hsa04510 Focal adhesion	http://www.genome.jp/kegg-bin/show_pathway?hsa04510	ERBB2 AKT1 BIRC2 BIRC3 XIAP
0.000606867	5	202	10.6861	Path:hsa05169 Epstein-Barr virus infection	http://www.genome.jp/kegg-bin/show_pathway?hsa05169	AKT1 APAF1 TRAF2 CASP3 CASP9
0.000606867	5	202	10.6861	Path:hsa05205 Proteoglycans in cancer	http://www.genome.jp/kegg-bin/show_pathway?hsa05205	ERBB2 AKT1 MRAS HIF1A CASP3
0.000612346	7	476	6.34878	Path:hsa05022 Pathways of neurodegeneration-multiple diseases	http://www.genome.jp/kegg-bin/show_pathway?hsa05022	APAF1 MAP3K5 TRAF2 UBC CASP3 CASP7 CASP9
0.000647129	4	109	15.8428	Path:hsa04066 HIF-1 signaling pathway	http://www.genome.jp/kegg-bin/show_pathway?hsa04066	ENO1 ERBB2 AKT1 HIF1A
0.000726281	7	495	6.10509	Path:hsa05168 Herpes simplex virus 1 infection	http://www.genome.jp/kegg-bin/show_pathway?hsa05168	AKT1 APAF1 BIRC2 BIRC3 TRAF2 CASP3 CASP9
0.00144616	4	138	12.5135	Path:hsa04915 Estrogen signaling pathway	http://www.genome.jp/kegg-bin/show_pathway?hsa04915	AKT1 FKBP5 HSPA8 HSP90AA1
0.00144616	4	138	12.5135	Path:hsa05418 Fluid shear stress and atherosclerosis	http://www.genome.jp/kegg-bin/show_pathway?hsa05418	AKT1 HSP90AA1 MAP3K5 TXN
0.00152421	4	142	12.161	Path:hsa04120 Ubiquitin mediated proteolysis	http://www.genome.jp/kegg-bin/show_pathway?hsa04120	BIRC2 BIRC3 XIAP UBC
0.00152421	3	58	22.3302	Path:hsa05213 Endometrial cancer	http://www.genome.jp/kegg-bin/show_pathway?hsa05213	ERBB2 AKT1 CASP9
0.00187301	5	273	7.9069	Path:hsa05020 Prion disease	http://www.genome.jp/kegg-bin/show_pathway?hsa05020	STIP1 APAF1 HSPA8 CASP3 CASP9
0.00235028	4	162	10.6597	Path:hsa05161 Hepatitis B	http://www.genome.jp/kegg-bin/show_pathway?hsa05161	AKT1 APAF1 CASP3 CASP9
0.00243059	3	70	18.5022	Path:hsa05230 Central carbon metabolism in cancer	http://www.genome.jp/kegg-bin/show_pathway?hsa05230	ERBB2 AKT1 HIF1A
0.00250061	3	72	17.9882	Path:hsa04137 Mitophagy-animal	http://www.genome.jp/kegg-bin/show_pathway?hsa04137	MRAS HIF1A UBC
0.00250061	3	72	17.9882	Path:hsa05223 Non-small cell lung cancer	http://www.genome.jp/kegg-bin/show_pathway?hsa05223	ERBB2 AKT1 CASP9
0.00251912	3	73	17.7418	Path:hsa04115 p53 signaling pathway	http://www.genome.jp/kegg-bin/show_pathway?hsa04115	APAF1 CASP3 CASP9
0.00251912	4	171	10.0986	Path:hsa05164 Influenza A	http://www.genome.jp/kegg-bin/show_pathway?hsa05164	AKT1 APAF1 CASP3 CASP9
0.00260493	5	306	7.0542	Path:hsa05016 Huntington disease	http://www.genome.jp/kegg-bin/show_pathway?hsa05016	APAF1 MAP3K5 TRAF2 CASP3 CASP9
0.0026495	3	76	17.0415	Path:hsa05212 Pancreatic cancer	http://www.genome.jp/kegg-bin/show_pathway?hsa05212	ERBB2 AKT1 CASP9
0.00277996	4	179	9.64731	Path:hsa05152 Tuberculosis	http://www.genome.jp/kegg-bin/show_pathway?hsa05152	AKT1 APAF1 CASP3 CASP9
0.00354168	4	193	8.9475	Path:hsa05202 Transcriptional misregulation in cancer	http://www.genome.jp/kegg-bin/show_pathway?hsa05202	H3-3B BIRC2 BIRC3 TRAF1
0.00354168	3	86	15.0599	Path:hsa05210 Colorectal cancer	http://www.genome.jp/kegg-bin/show_pathway?hsa05210	AKT1 CASP3 CASP9
0.00362992	4	197	8.76583	Path:hsa05130 Pathogenic Escherichia coli infection	http://www.genome.jp/kegg-bin/show_pathway?hsa05130	TRAF2 CASP3 CASP7 CASP9
0.00362992	4	197	8.76583	Path:hsa05207 Chemical carcinogenesis-receptor activation	http://www.genome.jp/kegg-bin/show_pathway?hsa05207	PTGES3 AKT1 XIAP HSP90AA1
0.00389879	4	202	8.54885	Path:hsa05203 Viral carcinogenesis	http://www.genome.jp/kegg-bin/show_pathway?hsa05203	H2BC5 TRAF1 TRAF2 CASP3
0.00407743	3	93	13.9264	Path:hsa04657 IL-17 signaling pathway	http://www.genome.jp/kegg-bin/show_pathway?hsa04657	HSP90AA1 TRAF2 CASP3
0.00408958	5	354	6.0977	Path:hsa04151 PI3K-Akt signaling pathway	http://www.genome.jp/kegg-bin/show_pathway?hsa04151	CDC37 ERBB2 AKT1 HSP90AA1 CASP9
0.00423309	4	210	8.22318	Path:hsa05170 Human immunodeficiency virus 1 infection	http://www.genome.jp/kegg-bin/show_pathway?hsa05170	AKT1 TRAF2 CASP3 CASP9
0.0044455	5	364	5.93018	Path:hsa05014 Amyotrophic lateral sclerosis	http://www.genome.jp/kegg-bin/show_pathway?hsa05014	APAF1 MAP3K5 TRAF2 CASP3 CASP9
0.00515834	4	224	7.70923	Path:hsa05163 Human cytomegalovirus infection	http://www.genome.jp/kegg-bin/show_pathway?hsa05163	AKT1 TRAF2 CASP3 CASP9
0.0071114	4	246	7.01979	Path:hsa05131 Shigellosis	http://www.genome.jp/kegg-bin/show_pathway?hsa05131	AKT1 H3-3B TRAF2 UBC
0.00734761	3	119	10.8836	Path:hsa04071 Sphingolipid signaling pathway	http://www.genome.jp/kegg-bin/show_pathway?hsa04071	AKT1 MAP3K5 TRAF2
0.00756498	3	121	10.7037	Path:hsa04919 Thyroid hormone signaling pathway	http://www.genome.jp/kegg-bin/show_pathway?hsa04919	AKT1 HIF1A CASP9
0.0112282	3	141	9.18547	Path:hsa04140 Autophagy-animal	http://www.genome.jp/kegg-bin/show_pathway?hsa04140	AKT1 MRAS HIF1A
0.0112282	3	141	9.18547	Path:hsa04936 Alcoholic liver disease	http://www.genome.jp/kegg-bin/show_pathway?hsa04936	AKT1 MAP3K5 CASP3
0.0112578	3	142	9.12078	Path:hsa05017 Spinocerebellar ataxia	http://www.genome.jp/kegg-bin/show_pathway?hsa05017	AKT1 MAP3K5 TRAF2
0.0124229	3	148	8.75102	Path:hsa05226 Gastric cancer	http://www.genome.jp/kegg-bin/show_pathway?hsa05226	ERBB2 AKT1 TERT
0.020628	2	59	14.6345	Path:hsa04370 VEGF signaling pathway	http://www.genome.jp/kegg-bin/show_pathway?hsa04370	AKT1 CASP9
0.0209642	2	60	14.3906	Path:hsa05416 Viral myocarditis	http://www.genome.jp/kegg-bin/show_pathway?hsa05416	CASP3 CASP9
0.0219769	2	62	13.9264	Path:hsa04213 Longevity regulating pathway-multiple species	http://www.genome.jp/kegg-bin/show_pathway?hsa04213	AKT1 HSPA8
0.022798	3	189	6.85265	Path:hsa04613 Neutrophil extracellular trap formation	http://www.genome.jp/kegg-bin/show_pathway?hsa04613	AKT1 H2BC5 H3-3B
0.0254343	2	68	12.6976	Path:hsa05211 Renal cell carcinoma	http://www.genome.jp/kegg-bin/show_pathway?hsa05211	AKT1 HIF1A
0.0257587	2	69	12.5135	Path:hsa04920 Adipocytokine signaling pathway	http://www.genome.jp/kegg-bin/show_pathway?hsa04920	AKT1 TRAF2
0.0305097	2	76	11.361	Path:hsa05133 Pertussis	http://www.genome.jp/kegg-bin/show_pathway?hsa05133	CASP3 CASP7
0.0315819	2	78	11.0697	Path:hsa04612 Antigen processing and presentation	http://www.genome.jp/kegg-bin/show_pathway?hsa04612	HSPA8 HSP90AA1
0.0318857	2	79	10.9295	Path:hsa01521 EGFR tyrosine kinase inhibitor resistance	http://www.genome.jp/kegg-bin/show_pathway?hsa01521	ERBB2 AKT1
0.0320316	3	222	5.83401	Path:hsa05166 Human T-cell leukemia virus 1 infection	http://www.genome.jp/kegg-bin/show_pathway?hsa05166	AKT1 XIAP TERT
0.0320316	3	223	5.80785	Path:hsa05208 Chemical carcinogenesis-reactive oxygen species	http://www.genome.jp/kegg-bin/show_pathway?hsa05208	AKT1 HIF1A MAP3K5
0.0343209	2	84	10.279	Path:hsa04012 ErbB signaling pathway	http://www.genome.jp/kegg-bin/show_pathway?hsa04012	ERBB2 AKT1
0.0377482	2	89	9.70151	Path:hsa05235 PD-L1 expression and PD-1 checkpoint pathway in cancer	http://www.genome.jp/kegg-bin/show_pathway?hsa05235	AKT1 HIF1A
0.0420868	2	95	9.08878	Path:hsa01522 Endocrine resistance	http://www.genome.jp/kegg-bin/show_pathway?hsa01522	ERBB2 AKT1
0.0440102	2	98	8.81055	Path:hsa05231 Choline metabolism in cancer	http://www.genome.jp/kegg-bin/show_pathway?hsa05231	AKT1 HIF1A
0.045099	2	100	8.63434	Path:hsa04933 AGE-RAGE signaling pathway in diabetic complications	http://www.genome.jp/kegg-bin/show_pathway?hsa04933	AKT1 CASP3
0.0461853	2	102	8.46504	Path:hsa04914 Progesterone-mediated oocyte maturation	http://www.genome.jp/kegg-bin/show_pathway?hsa04914	AKT1 HSP90AA1
0.0472692	2	104	8.30225	Path:hsa04625 C-type lectin receptor signaling pathway	http://www.genome.jp/kegg-bin/show_pathway?hsa04625	AKT1 MRAS
0.0500542	2	108	7.99476	Path:hsa04659 Th17 cell differentiation	http://www.genome.jp/kegg-bin/show_pathway?hsa04659	HIF1A HSP90AA1
0.0591043	2	119	7.25575	Path:hsa04722 Neurotrophin signaling pathway	http://www.genome.jp/kegg-bin/show_pathway?hsa04722	AKT1 MAP3K5
0.0648098	2	126	6.85265	Path:hsa04380 Osteoclast differentiation	http://www.genome.jp/kegg-bin/show_pathway?hsa04380	AKT1 TRAF2
0.072573	2	135	6.39581	Path:hsa05322 Systemic lupus erythematosus	http://www.genome.jp/kegg-bin/show_pathway?hsa05322	H2BC5 H3-3B
0.0736321	2	137	6.30244	Path:hsa05135 Yersinia infection	http://www.genome.jp/kegg-bin/show_pathway?hsa05135	AKT1 TRAF2
0.0737181	2	138	6.25677	Path:hsa04371 Apelin signaling pathway	http://www.genome.jp/kegg-bin/show_pathway?hsa04371	AKT1 MRAS
0.0739091	3	331	3.91284	Path:hsa05165 Human papillomavirus infection	http://www.genome.jp/kegg-bin/show_pathway?hsa05165	AKT1 TERT CASP3
0.0806756	2	147	5.8737	Path:hsa05224 Breast cancer	http://www.genome.jp/kegg-bin/show_pathway?hsa05224	ERBB2 AKT1
0.0807233	2	148	5.83401	Path:hsa04072 Phospholipase D signaling pathway	http://www.genome.jp/kegg-bin/show_pathway?hsa04072	AKT1 MRAS
0.0876737	2	156	5.53483	Path:hsa04218 Cellular senescence	http://www.genome.jp/kegg-bin/show_pathway?hsa04218	AKT1 MRAS
0.0876798	2	157	5.49958	Path:hsa04390 Hippo signaling pathway	http://www.genome.jp/kegg-bin/show_pathway?hsa04390	BIRC2 BIRC3
0.0906671	2	161	5.36294	Path:hsa05206 MicroRNAs in cancer	http://www.genome.jp/kegg-bin/show_pathway?hsa05206	ERBB2 CASP3
0.0956653	2	167	5.17026	Path:hsa05225 Hepatocellular carcinoma	http://www.genome.jp/kegg-bin/show_pathway?hsa05225	AKT1 TERT
0.0966322	2	169	5.10908	Path:hsa04530 Tight junction	http://www.genome.jp/kegg-bin/show_pathway?hsa04530	ERBB2 MAP3K5
0.113043	2	186	4.64212	Path:hsa05034 Alcoholism	http://www.genome.jp/kegg-bin/show_pathway?hsa05034	H2BC5 H3-3B
0.137806	2	210	4.11159	Path:hsa04015 Rap1 signaling pathway	http://www.genome.jp/kegg-bin/show_pathway?hsa04015	AKT1 MRAS
0.145241	1	41	10.5297	Path:hsa05219 Bladder cancer	http://www.genome.jp/kegg-bin/show_pathway?hsa05219	ERBB2
0.16197	2	235	3.67419	Path:hsa04014 Ras signaling pathway	http://www.genome.jp/kegg-bin/show_pathway?hsa04014	AKT1 MRAS
0.16197	1	47	9.18547	Path:hsa04973 Carbohydrate digestion and absorption	http://www.genome.jp/kegg-bin/show_pathway?hsa04973	AKT1
0.169979	1	50	8.63434	Path:hsa00330 Arginine and proline metabolism	http://www.genome.jp/kegg-bin/show_pathway?hsa00330	PRODH
0.193449	1	58	7.4434	Path:hsa04923 Regulation of lipolysis in adipocytes	http://www.genome.jp/kegg-bin/show_pathway?hsa04923	AKT1
