# Supplementary material for: Proteomic and phosphoproteomic profilings reveal distinct cellular responses during Tilapinevirus tilapiae entry and replication
Source: PeerJ. 2025 Feb 21;13:e18923. doi: 10.7717/peerj.18923 (PMC11849505; doi:10.7717/peerj.18923)
Supplement: Supplemental Information 7 [file peerj-13-18923-s007.xlsx]

## Sheet: Sheet 1
		f.value	p.value	#NAME?	FDR	Fisher's LSD
I3KTF5	Keratin, type II cytoskeletal 8	30.845	4.6456e-16	15.333	6.0579e-13	RHTiB_30min - RHTiB_BL; RHTiB_1hr - RHTiB_BL; RHTiB_6hr - RHTiB_BL; RHTiB_BL - RHTiB_24hr; RHTiB_10min - RHTiB_24hr; RHTiB_30min - RHTiB_24hr; RHTiB_1hr - RHTiB_24hr; RHTiB_3hr - RHTiB_24hr; RHTiB_6hr - RHTiB_24hr
A0A669CTQ5	Protein phosphatase 2 regulatory subunit B'alpha	26.511	1.0577e-14	13.976	1.2753e-05	RHTiB_BL - RHTiB_10min; RHTiB_BL - RHTiB_30min; RHTiB_BL - RHTiB_1hr; RHTiB_BL - RHTiB_3hr; RHTiB_BL - RHTiB_6hr; RHTiB_BL - RHTiB_24hr
I3K9W5	methenyltetrahydrofolate cyclohydrolase (EC 3.5.4.9)	26.258	1.2835e-14	13.892	0.0437	RHTiB_BL - RHTiB_10min; RHTiB_BL - RHTiB_30min; RHTiB_BL - RHTiB_1hr; RHTiB_BL - RHTiB_3hr; RHTiB_BL - RHTiB_6hr; RHTiB_BL - RHTiB_24hr
I3KG25	Tetraspanin 13	26.191	1.3509e-14	13.869	0.0437	RHTiB_BL - RHTiB_10min; RHTiB_BL - RHTiB_30min; RHTiB_BL - RHTiB_1hr; RHTiB_BL - RHTiB_3hr; RHTiB_BL - RHTiB_6hr; RHTiB_BL - RHTiB_24hr
A0A669CN37	Multidrug resistance-associated protein 5	20.317	1.8545e-12	11.732	0.0035373	RHTiB_BL - RHTiB_10min; RHTiB_BL - RHTiB_30min; RHTiB_BL - RHTiB_1hr; RHTiB_BL - RHTiB_6hr; RHTiB_BL - RHTiB_24hr; RHTiB_30min - RHTiB_10min; RHTiB_1hr - RHTiB_10min; RHTiB_3hr - RHTiB_10min; RHTiB_30min - RHTiB_6hr; RHTiB_3hr - RHTiB_6hr; RHTiB_3hr - RHTiB_24hr
A0A669D6L6	Neuropilin	15.537	2.1376e-10	9.6701	0.036767	RHTiB_BL - RHTiB_10min; RHTiB_BL - RHTiB_30min; RHTiB_BL - RHTiB_1hr; RHTiB_3hr - RHTiB_10min; RHTiB_6hr - RHTiB_10min; RHTiB_3hr - RHTiB_30min; RHTiB_6hr - RHTiB_30min; RHTiB_3hr - RHTiB_1hr; RHTiB_6hr - RHTiB_1hr
A0A669D3S9	Transgelin	13.523	2.0509e-09	8.6881	3.8204e-07	RHTiB_BL - RHTiB_24hr; RHTiB_10min - RHTiB_24hr; RHTiB_30min - RHTiB_24hr; RHTiB_1hr - RHTiB_24hr; RHTiB_3hr - RHTiB_24hr; RHTiB_6hr - RHTiB_24hr
A0A669DVQ0	Neuronal tyrosine phosphorylated phosphoinositide-3-kinase adaptor 1	10.592	7.8241e-08	7.1066	0.0026394	RHTiB_10min - RHTiB_BL; RHTiB_30min - RHTiB_BL; RHTiB_1hr - RHTiB_BL; RHTiB_3hr - RHTiB_BL; RHTiB_6hr - RHTiB_BL; RHTiB_24hr - RHTiB_BL; RHTiB_24hr - RHTiB_10min; RHTiB_24hr - RHTiB_30min; RHTiB_6hr - RHTiB_3hr; RHTiB_24hr - RHTiB_3hr
A0A669EAV9	Phosphatidylinositol 4-phosphate 5-kinase type-1 alpha	9.7861	2.3175e-07	6.635	4.404e-12	RHTiB_30min - RHTiB_BL; RHTiB_30min - RHTiB_10min; RHTiB_30min - RHTiB_1hr; RHTiB_30min - RHTiB_3hr; RHTiB_30min - RHTiB_6hr; RHTiB_30min - RHTiB_24hr
I3K0X5	Reticulon 4 interacting protein 1	9.7855	2.3195e-07	6.6346	4.404e-12	RHTiB_30min - RHTiB_BL; RHTiB_30min - RHTiB_10min; RHTiB_30min - RHTiB_1hr; RHTiB_30min - RHTiB_3hr; RHTiB_30min - RHTiB_6hr; RHTiB_30min - RHTiB_24hr
A0A669EU43	Uncharacterized protein	9.4721	3.5757e-07	6.4466	4.404e-12	RHTiB_30min - RHTiB_BL; RHTiB_30min - RHTiB_10min; RHTiB_30min - RHTiB_1hr; RHTiB_30min - RHTiB_3hr; RHTiB_30min - RHTiB_6hr; RHTiB_30min - RHTiB_24hr
A0A669D063	Alpha-ketoglutarate-dependent dioxygenase FTO (EC 1.14.11.53) (U6 small nuclear RNA (2'-O-methyladenosine-N(6)-)-demethylase FTO) (U6 small nuclear RNA N(6)-methyladenosine-demethylase FTO) (mRNA (2'-O-methyladenosine-N(6)-)-demethylase FTO) (mRNA N(6)-methyladenosine demethylase FTO) (tRNA N1-methyl adenine demethylase FTO)	7.3207	8.3394e-06	5.0789	3.0246e-05	RHTiB_30min - RHTiB_BL; RHTiB_30min - RHTiB_10min; RHTiB_30min - RHTiB_1hr; RHTiB_30min - RHTiB_3hr; RHTiB_30min - RHTiB_6hr; RHTiB_30min - RHTiB_24hr
I3J3Z6	Complement C4	7.1033	1.1677e-05	4.9327	3.0246e-05	RHTiB_30min - RHTiB_BL; RHTiB_30min - RHTiB_10min; RHTiB_30min - RHTiB_1hr; RHTiB_30min - RHTiB_3hr; RHTiB_30min - RHTiB_6hr; RHTiB_30min - RHTiB_24hr
I3KT03	LIM domain only 4	6.5413	2.8337e-05	4.5476	0.0029471	RHTiB_30min - RHTiB_BL; RHTiB_30min - RHTiB_10min; RHTiB_30min - RHTiB_1hr; RHTiB_30min - RHTiB_3hr; RHTiB_30min - RHTiB_6hr; RHTiB_30min - RHTiB_24hr
I3KEG8	Eotaxin-like	6.3665	3.7518e-05	4.4258	0.0030435	RHTiB_30min - RHTiB_BL; RHTiB_30min - RHTiB_10min; RHTiB_30min - RHTiB_1hr; RHTiB_30min - RHTiB_3hr; RHTiB_30min - RHTiB_6hr; RHTiB_30min - RHTiB_24hr
A0A669EHB3	Mitochondrial import inner membrane translocase subunit TIM44	6.3606	3.7878e-05	4.4216	0.0030435	RHTiB_30min - RHTiB_BL; RHTiB_30min - RHTiB_10min; RHTiB_30min - RHTiB_1hr; RHTiB_30min - RHTiB_3hr; RHTiB_30min - RHTiB_6hr; RHTiB_30min - RHTiB_24hr
A0A669BTM0	Copine 7	6.3518	3.842e-05	4.4154	0.0030435	RHTiB_30min - RHTiB_BL; RHTiB_30min - RHTiB_10min; RHTiB_30min - RHTiB_1hr; RHTiB_30min - RHTiB_3hr; RHTiB_30min - RHTiB_6hr; RHTiB_30min - RHTiB_24hr
A0A669CM34	SLIT-ROBO Rho GTPase activating protein 2	6.2571	4.4775e-05	4.349	0.032017	RHTiB_30min - RHTiB_BL; RHTiB_30min - RHTiB_10min; RHTiB_30min - RHTiB_1hr; RHTiB_30min - RHTiB_3hr; RHTiB_30min - RHTiB_6hr; RHTiB_30min - RHTiB_24hr
A0A669D9M5	Plexin-C1	6.2454	4.5631e-05	4.3407	0.038356	RHTiB_30min - RHTiB_BL; RHTiB_30min - RHTiB_10min; RHTiB_30min - RHTiB_1hr; RHTiB_30min - RHTiB_3hr; RHTiB_30min - RHTiB_6hr; RHTiB_30min - RHTiB_24hr
I3KT98	Transmembrane protein 131	6.2314	4.668e-05	4.3309	0.0437	RHTiB_30min - RHTiB_BL; RHTiB_30min - RHTiB_10min; RHTiB_30min - RHTiB_1hr; RHTiB_30min - RHTiB_3hr; RHTiB_30min - RHTiB_6hr; RHTiB_30min - RHTiB_24hr
A0A669C2N7	ATP-binding cassette, sub-family C (CFTR/MRP), member 4	6.1091	5.6966e-05	4.2444	0.0437	RHTiB_30min - RHTiB_BL; RHTiB_30min - RHTiB_10min; RHTiB_30min - RHTiB_1hr; RHTiB_30min - RHTiB_3hr; RHTiB_30min - RHTiB_6hr; RHTiB_30min - RHTiB_24hr
A0A669F3I8	Sorbin and SH3 domain containing 2a	5.8217	9.1358e-05	4.0393	0.0437	RHTiB_30min - RHTiB_BL; RHTiB_30min - RHTiB_10min; RHTiB_30min - RHTiB_1hr; RHTiB_30min - RHTiB_3hr; RHTiB_30min - RHTiB_6hr; RHTiB_30min - RHTiB_24hr
A0A669EA87	DNA topoisomerase 2 (EC 5.6.2.2)	4.748	0.00056472	3.2482	0.0437	RHTiB_30min - RHTiB_BL; RHTiB_30min - RHTiB_10min; RHTiB_30min - RHTiB_1hr; RHTiB_30min - RHTiB_3hr; RHTiB_30min - RHTiB_6hr; RHTiB_30min - RHTiB_24hr
I3KBF6	WD repeat and FYVE domain containing 1	4.6502	0.00066952	3.1742	0.0437	RHTiB_30min - RHTiB_BL; RHTiB_30min - RHTiB_10min; RHTiB_30min - RHTiB_1hr; RHTiB_30min - RHTiB_3hr; RHTiB_30min - RHTiB_6hr; RHTiB_30min - RHTiB_24hr
I3JWY6	AT-rich interactive domain-containing protein 5A	4.6207	0.00070489	3.1519	0.0437	RHTiB_30min - RHTiB_BL; RHTiB_30min - RHTiB_10min; RHTiB_30min - RHTiB_1hr; RHTiB_30min - RHTiB_3hr; RHTiB_30min - RHTiB_6hr; RHTiB_30min - RHTiB_24hr
I3JXJ2	Chordin	4.5613	0.00078205	3.1068	0.0437	RHTiB_30min - RHTiB_BL; RHTiB_30min - RHTiB_10min; RHTiB_30min - RHTiB_1hr; RHTiB_30min - RHTiB_3hr; RHTiB_30min - RHTiB_6hr; RHTiB_30min - RHTiB_24hr
A0A669E5T8	Tau tubulin kinase 2a	4.5338	0.0008207	3.0858	0.0437	RHTiB_30min - RHTiB_BL; RHTiB_30min - RHTiB_10min; RHTiB_30min - RHTiB_1hr; RHTiB_30min - RHTiB_3hr; RHTiB_30min - RHTiB_6hr; RHTiB_30min - RHTiB_24hr
A0A669EFC5	Pyridine nucleotide-disulphide oxidoreductase domain 2	4.5101	0.00085556	3.0677	0.0437	RHTiB_30min - RHTiB_BL; RHTiB_30min - RHTiB_10min; RHTiB_30min - RHTiB_1hr; RHTiB_30min - RHTiB_3hr; RHTiB_30min - RHTiB_6hr; RHTiB_30min - RHTiB_24hr
A0A669EWZ5	Glypican 2	4.5081	0.00085849	3.0663	0.0437	RHTiB_30min - RHTiB_BL; RHTiB_30min - RHTiB_10min; RHTiB_30min - RHTiB_1hr; RHTiB_30min - RHTiB_3hr; RHTiB_30min - RHTiB_6hr; RHTiB_30min - RHTiB_24hr
A0A669EAI4	Enhancer of mRNA-decapping protein 4	4.4925	0.00088243	3.0543	0.0437	RHTiB_30min - RHTiB_BL; RHTiB_30min - RHTiB_10min; RHTiB_30min - RHTiB_1hr; RHTiB_30min - RHTiB_3hr; RHTiB_30min - RHTiB_6hr; RHTiB_30min - RHTiB_24hr
A0A669F2F6	CDC5 cell division cycle 5-like (S. pombe)	4.4486	0.00095312	3.0209	0.0437	RHTiB_30min - RHTiB_BL; RHTiB_30min - RHTiB_10min; RHTiB_30min - RHTiB_1hr; RHTiB_30min - RHTiB_3hr; RHTiB_30min - RHTiB_6hr; RHTiB_30min - RHTiB_24hr
I3J053	Semaphorin 3B	4.3497	0.0011346	2.9451	0.0437	RHTiB_30min - RHTiB_BL; RHTiB_30min - RHTiB_10min; RHTiB_30min - RHTiB_1hr; RHTiB_30min - RHTiB_3hr; RHTiB_30min - RHTiB_6hr; RHTiB_30min - RHTiB_24hr
A0A669DIA7	Serotransferrin	4.2382	0.0013824	2.8594	0.0437	RHTiB_30min - RHTiB_BL; RHTiB_30min - RHTiB_10min; RHTiB_30min - RHTiB_1hr; RHTiB_30min - RHTiB_3hr; RHTiB_30min - RHTiB_6hr; RHTiB_30min - RHTiB_24hr
A0A669E1I2	Suppressor of cytokine signaling 7	4.1636	0.0015781	2.8019	0.0437	RHTiB_30min - RHTiB_BL; RHTiB_30min - RHTiB_10min; RHTiB_30min - RHTiB_1hr; RHTiB_30min - RHTiB_3hr; RHTiB_30min - RHTiB_6hr; RHTiB_30min - RHTiB_24hr
I3KT46	Sushi, nidogen and EGF like domains 1	4.14	0.001646	2.7836	0.0437	RHTiB_30min - RHTiB_BL; RHTiB_30min - RHTiB_10min; RHTiB_30min - RHTiB_1hr; RHTiB_30min - RHTiB_3hr; RHTiB_30min - RHTiB_6hr; RHTiB_30min - RHTiB_24hr
I3KCI4	Nipped-B protein	4.0161	0.0020531	2.6876	0.0437	RHTiB_30min - RHTiB_BL; RHTiB_30min - RHTiB_10min; RHTiB_30min - RHTiB_1hr; RHTiB_30min - RHTiB_3hr; RHTiB_30min - RHTiB_6hr; RHTiB_30min - RHTiB_24hr
A0A669BSQ5	Transmembrane protein 120A	3.9999	0.0021136	2.675	0.0437	RHTiB_30min - RHTiB_BL; RHTiB_30min - RHTiB_10min; RHTiB_30min - RHTiB_1hr; RHTiB_30min - RHTiB_3hr; RHTiB_30min - RHTiB_6hr; RHTiB_30min - RHTiB_24hr
I3K0Z3	Mitogen-activated protein kinase binding protein 1	3.9997	0.0021143	2.6748	0.046665	RHTiB_30min - RHTiB_BL; RHTiB_30min - RHTiB_10min; RHTiB_30min - RHTiB_1hr; RHTiB_30min - RHTiB_3hr; RHTiB_30min - RHTiB_6hr; RHTiB_30min - RHTiB_24hr
I3JV20	Plasmalemma vesicle associated protein	3.9997	0.0021145	2.6748	0.0029471	RHTiB_30min - RHTiB_BL; RHTiB_1hr - RHTiB_BL; RHTiB_3hr - RHTiB_BL; RHTiB_30min - RHTiB_10min; RHTiB_1hr - RHTiB_10min; RHTiB_3hr - RHTiB_10min; RHTiB_30min - RHTiB_6hr; RHTiB_30min - RHTiB_24hr; RHTiB_1hr - RHTiB_6hr; RHTiB_1hr - RHTiB_24hr; RHTiB_3hr - RHTiB_6hr; RHTiB_3hr - RHTiB_24hr
I3KTF3	Keratin, type I cytoskeletal 18	3.9996	0.0021145	2.6748	0.0437	RHTiB_30min - RHTiB_BL; RHTiB_1hr - RHTiB_BL; RHTiB_3hr - RHTiB_BL; RHTiB_6hr - RHTiB_BL; RHTiB_10min - RHTiB_24hr; RHTiB_30min - RHTiB_24hr; RHTiB_1hr - RHTiB_24hr; RHTiB_3hr - RHTiB_24hr; RHTiB_6hr - RHTiB_24hr
I3JRH6	Keratin 18a, tandem duplicate 1	3.9996	0.0021146	2.6748	0.0011713	RHTiB_30min - RHTiB_BL; RHTiB_1hr - RHTiB_BL; RHTiB_3hr - RHTiB_BL; RHTiB_6hr - RHTiB_BL; RHTiB_30min - RHTiB_10min; RHTiB_1hr - RHTiB_10min; RHTiB_6hr - RHTiB_10min; RHTiB_30min - RHTiB_24hr; RHTiB_1hr - RHTiB_24hr; RHTiB_6hr - RHTiB_3hr; RHTiB_6hr - RHTiB_24hr
I3J505	Actin, cytoplasmic 1	3.9996	0.0021148	2.6747	4.2388e-05	RHTiB_30min - RHTiB_BL; RHTiB_1hr - RHTiB_BL; RHTiB_3hr - RHTiB_BL; RHTiB_24hr - RHTiB_BL; RHTiB_30min - RHTiB_10min; RHTiB_1hr - RHTiB_10min; RHTiB_3hr - RHTiB_10min; RHTiB_30min - RHTiB_6hr; RHTiB_30min - RHTiB_24hr; RHTiB_1hr - RHTiB_6hr; RHTiB_1hr - RHTiB_24hr; RHTiB_3hr - RHTiB_6hr; RHTiB_24hr - RHTiB_6hr
I3KSF3	Zgc:153867	3.9993	0.0021157	2.6745	0.0437	RHTiB_30min - RHTiB_BL; RHTiB_3hr - RHTiB_BL; RHTiB_30min - RHTiB_10min; RHTiB_3hr - RHTiB_10min; RHTiB_30min - RHTiB_1hr; RHTiB_30min - RHTiB_6hr; RHTiB_30min - RHTiB_24hr; RHTiB_3hr - RHTiB_1hr; RHTiB_3hr - RHTiB_6hr; RHTiB_3hr - RHTiB_24hr
A0A669CEX9	Myosin regulatory light polypeptide 9	3.9992	0.0021162	2.6745	0.0437	RHTiB_30min - RHTiB_BL; RHTiB_3hr - RHTiB_BL; RHTiB_30min - RHTiB_10min; RHTiB_3hr - RHTiB_10min; RHTiB_30min - RHTiB_1hr; RHTiB_30min - RHTiB_6hr; RHTiB_30min - RHTiB_24hr; RHTiB_3hr - RHTiB_6hr; RHTiB_3hr - RHTiB_24hr
Q8UW60	Elongation factor 1-alpha	3.9992	0.0021163	2.6744	0.0487	RHTiB_30min - RHTiB_BL; RHTiB_3hr - RHTiB_BL; RHTiB_30min - RHTiB_10min; RHTiB_3hr - RHTiB_10min; RHTiB_30min - RHTiB_6hr; RHTiB_30min - RHTiB_24hr; RHTiB_3hr - RHTiB_6hr; RHTiB_3hr - RHTiB_24hr
A0A669B8J3	Angiotensin-converting enzyme (EC 3.4.-.-)	3.9991	0.0021165	2.6744	0.005415	RHTiB_1hr - RHTiB_BL; RHTiB_1hr - RHTiB_10min; RHTiB_1hr - RHTiB_30min; RHTiB_1hr - RHTiB_3hr; RHTiB_1hr - RHTiB_6hr; RHTiB_1hr - RHTiB_24hr
I3JF59	Axin interactor, dorsalization associated	3.9991	0.0021168	2.6743	0.0437	RHTiB_1hr - RHTiB_BL; RHTiB_1hr - RHTiB_10min; RHTiB_1hr - RHTiB_30min; RHTiB_1hr - RHTiB_3hr; RHTiB_1hr - RHTiB_6hr; RHTiB_1hr - RHTiB_24hr
I3KKL3	Sterile alpha motif domain-containing protein 9-like	3.999	0.002117	2.6743	0.038356	RHTiB_3hr - RHTiB_BL; RHTiB_1hr - RHTiB_10min; RHTiB_3hr - RHTiB_10min; RHTiB_3hr - RHTiB_30min; RHTiB_1hr - RHTiB_6hr; RHTiB_1hr - RHTiB_24hr; RHTiB_3hr - RHTiB_6hr; RHTiB_3hr - RHTiB_24hr
A0A669DFZ1	Structural maintenance of chromosomes flexible hinge domain containing 1	3.999	0.0021171	2.6743	0.00090622	RHTiB_3hr - RHTiB_BL; RHTiB_3hr - RHTiB_10min; RHTiB_3hr - RHTiB_30min; RHTiB_3hr - RHTiB_1hr; RHTiB_3hr - RHTiB_6hr; RHTiB_3hr - RHTiB_24hr
A0A669CUK0	Collagen, type XII, alpha 1a	3.9989	0.0021174	2.6742	0.0029471	RHTiB_3hr - RHTiB_BL; RHTiB_3hr - RHTiB_10min; RHTiB_3hr - RHTiB_30min; RHTiB_3hr - RHTiB_1hr; RHTiB_3hr - RHTiB_6hr; RHTiB_3hr - RHTiB_24hr
A0A669DT35	Eukaryotic translation initiation factor 3 subunit C (eIF3c) (Eukaryotic translation initiation factor 3 subunit 8)	3.9984	0.0021193	2.6738	0.036377	RHTiB_3hr - RHTiB_BL; RHTiB_3hr - RHTiB_10min; RHTiB_3hr - RHTiB_30min; RHTiB_3hr - RHTiB_1hr; RHTiB_3hr - RHTiB_6hr; RHTiB_3hr - RHTiB_24hr
A0A669B8N3	Spectrin alpha, non-erythrocytic 1	3.9977	0.002122	2.6733	0.038356	RHTiB_3hr - RHTiB_BL; RHTiB_3hr - RHTiB_10min; RHTiB_3hr - RHTiB_30min; RHTiB_3hr - RHTiB_1hr; RHTiB_3hr - RHTiB_6hr; RHTiB_3hr - RHTiB_24hr
I3K2C6	Glycerol-3-phosphate dehydrogenase 2 (mitochondrial)	3.9975	0.0021227	2.6731	0.038356	RHTiB_3hr - RHTiB_BL; RHTiB_3hr - RHTiB_10min; RHTiB_3hr - RHTiB_30min; RHTiB_3hr - RHTiB_1hr; RHTiB_3hr - RHTiB_6hr; RHTiB_3hr - RHTiB_24hr
I3K3J4	Sodium/potassium-transporting ATPase subunit alpha	3.994	0.0021361	2.6704	0.038356	RHTiB_3hr - RHTiB_BL; RHTiB_3hr - RHTiB_10min; RHTiB_3hr - RHTiB_30min; RHTiB_3hr - RHTiB_1hr; RHTiB_3hr - RHTiB_6hr; RHTiB_3hr - RHTiB_24hr
I3JAS7	Alpha-1,3-mannosyl-glycoprotein 2-beta-N-acetylglucosaminyltransferase (GNT-I) (GlcNAc-T I) (EC 2.4.1.101) (N-glycosyl-oligosaccharide-glycoprotein N-acetylglucosaminyltransferase I)	3.9912	0.0021469	2.6682	0.040093	RHTiB_3hr - RHTiB_BL; RHTiB_3hr - RHTiB_10min; RHTiB_3hr - RHTiB_30min; RHTiB_3hr - RHTiB_1hr; RHTiB_3hr - RHTiB_6hr; RHTiB_3hr - RHTiB_24hr
A0A669BLC9	NLRC4_HD2 domain-containing protein	3.9905	0.0021493	2.6677	0.0437	RHTiB_3hr - RHTiB_BL; RHTiB_3hr - RHTiB_10min; RHTiB_3hr - RHTiB_30min; RHTiB_3hr - RHTiB_1hr; RHTiB_3hr - RHTiB_6hr; RHTiB_3hr - RHTiB_24hr
A0A669D2C8	T-box transcription factor 15	3.9898	0.0021522	2.6671	0.0437	RHTiB_3hr - RHTiB_BL; RHTiB_3hr - RHTiB_10min; RHTiB_3hr - RHTiB_30min; RHTiB_3hr - RHTiB_1hr; RHTiB_3hr - RHTiB_6hr; RHTiB_3hr - RHTiB_24hr
A0A669CYK9	V-maf avian musculoaponeurotic fibrosarcoma oncogene homolog b (paralog b)	3.9876	0.0021605	2.6654	0.0437	RHTiB_3hr - RHTiB_BL; RHTiB_3hr - RHTiB_10min; RHTiB_3hr - RHTiB_30min; RHTiB_3hr - RHTiB_1hr; RHTiB_3hr - RHTiB_6hr; RHTiB_3hr - RHTiB_24hr
A0A669EYT5	Dynein axonemal assembly factor 5	3.9852	0.00217	2.6635	0.0437	RHTiB_3hr - RHTiB_BL; RHTiB_3hr - RHTiB_10min; RHTiB_3hr - RHTiB_30min; RHTiB_3hr - RHTiB_1hr; RHTiB_3hr - RHTiB_6hr; RHTiB_3hr - RHTiB_24hr
I3KMG7	Fas associated factor family member 2	3.9838	0.0021755	2.6624	0.0437	RHTiB_3hr - RHTiB_BL; RHTiB_3hr - RHTiB_10min; RHTiB_3hr - RHTiB_30min; RHTiB_3hr - RHTiB_1hr; RHTiB_3hr - RHTiB_6hr; RHTiB_3hr - RHTiB_24hr
A0A669CPF1	Perforin-1	3.9808	0.0021871	2.6601	0.0437	RHTiB_3hr - RHTiB_BL; RHTiB_3hr - RHTiB_10min; RHTiB_3hr - RHTiB_30min; RHTiB_3hr - RHTiB_1hr; RHTiB_3hr - RHTiB_6hr; RHTiB_3hr - RHTiB_24hr
A0A669B965	F-box protein 15	3.9795	0.0021922	2.6591	0.0437	RHTiB_3hr - RHTiB_BL; RHTiB_3hr - RHTiB_10min; RHTiB_3hr - RHTiB_30min; RHTiB_3hr - RHTiB_1hr; RHTiB_3hr - RHTiB_6hr; RHTiB_3hr - RHTiB_24hr
I3JGZ0	TNF receptor superfamily member 21	3.9786	0.0021957	2.6584	0.0437	RHTiB_3hr - RHTiB_BL; RHTiB_3hr - RHTiB_10min; RHTiB_3hr - RHTiB_30min; RHTiB_3hr - RHTiB_1hr; RHTiB_3hr - RHTiB_6hr; RHTiB_3hr - RHTiB_24hr
A0A669BIM7	Spartin	3.9719	0.0022221	2.6532	0.0437	RHTiB_3hr - RHTiB_BL; RHTiB_3hr - RHTiB_10min; RHTiB_3hr - RHTiB_30min; RHTiB_3hr - RHTiB_1hr; RHTiB_3hr - RHTiB_6hr; RHTiB_3hr - RHTiB_24hr
I3KEL4	Zona pellucida glycoprotein 3f, tandem duplicate 1	3.9685	0.0022359	2.6505	0.0437	RHTiB_6hr - RHTiB_BL; RHTiB_6hr - RHTiB_10min; RHTiB_6hr - RHTiB_30min; RHTiB_6hr - RHTiB_1hr; RHTiB_6hr - RHTiB_3hr; RHTiB_6hr - RHTiB_24hr
I3JNS4	Small RNA 2'-O-methyltransferase (EC 2.1.1.n8) (HEN1 methyltransferase homolog 1)	3.9666	0.0022436	2.6491	0.0437	RHTiB_6hr - RHTiB_BL; RHTiB_6hr - RHTiB_10min; RHTiB_24hr - RHTiB_10min; RHTiB_6hr - RHTiB_30min; RHTiB_6hr - RHTiB_1hr; RHTiB_24hr - RHTiB_1hr; RHTiB_6hr - RHTiB_3hr; RHTiB_24hr - RHTiB_3hr
I3JJX1	Ig-like domain-containing protein	3.9546	0.0022923	2.6397	4.8365e-10	RHTiB_6hr - RHTiB_BL; RHTiB_24hr - RHTiB_BL; RHTiB_6hr - RHTiB_10min; RHTiB_24hr - RHTiB_10min; RHTiB_6hr - RHTiB_30min; RHTiB_24hr - RHTiB_30min; RHTiB_6hr - RHTiB_1hr; RHTiB_24hr - RHTiB_1hr; RHTiB_6hr - RHTiB_3hr; RHTiB_24hr - RHTiB_3hr; RHTiB_6hr - RHTiB_24hr
A0A669EXK3	Myosin heavy chain 9	3.9502	0.0023104	2.6363	4.6457e-08	RHTiB_24hr - RHTiB_BL; RHTiB_24hr - RHTiB_10min; RHTiB_24hr - RHTiB_30min; RHTiB_24hr - RHTiB_1hr; RHTiB_24hr - RHTiB_3hr; RHTiB_24hr - RHTiB_6hr
A0A669DA65	Tensin-3	3.9497	0.0023123	2.6359	0.0437	RHTiB_24hr - RHTiB_BL; RHTiB_24hr - RHTiB_10min; RHTiB_24hr - RHTiB_30min; RHTiB_24hr - RHTiB_1hr; RHTiB_24hr - RHTiB_3hr; RHTiB_24hr - RHTiB_6hr
A0A669BWE0	C-1-tetrahydrofolate synthase, cytoplasmic (EC 1.5.1.5) (EC 3.5.4.9) (EC 6.3.4.3)	3.9051	0.002505	2.6012	0.0437	RHTiB_24hr - RHTiB_BL; RHTiB_24hr - RHTiB_10min; RHTiB_24hr - RHTiB_30min; RHTiB_24hr - RHTiB_1hr; RHTiB_24hr - RHTiB_3hr; RHTiB_24hr - RHTiB_6hr
A0A669DUQ5	Pleckstrin homology domain containing, family H (with MyTH4 domain) member 2	3.8735	0.0026516	2.5765	0.0437	RHTiB_24hr - RHTiB_BL; RHTiB_24hr - RHTiB_10min; RHTiB_24hr - RHTiB_30min; RHTiB_24hr - RHTiB_1hr; RHTiB_24hr - RHTiB_3hr; RHTiB_24hr - RHTiB_6hr
