# Supplementary material for: Proteomic and phosphoproteomic profilings reveal distinct cellular responses during Tilapinevirus tilapiae entry and replication
Source: PeerJ. 2025 Feb 21;13:e18923. doi: 10.7717/peerj.18923 (PMC11849505; doi:10.7717/peerj.18923)
Supplement: Supplemental Information 8 [file peerj-13-18923-s008.xlsx]

## Sheet: Sheet 1
Protein ID	Protein name	f.value	p.value	#NAME?	FDR	Fisher's LSD
A0A669CUF4	BCAS3 microtubule associated cell migration factor	5.542	0.00014557	3.8369	0.038605	RHTiB_BL - RHTiB_10min; RHTiB_BL - RHTiB_30min; RHTiB_BL - RHTiB_1hr; RHTiB_BL - RHTiB_3hr; RHTiB_BL - RHTiB_6hr; RHTiB_BL - RHTiB_24hr; RHTiB_1hr - RHTiB_30min; RHTiB_3hr - RHTiB_30min; RHTiB_6hr - RHTiB_30min; RHTiB_24hr - RHTiB_30min
A0A669DW65	Alpha-2-macroglobulin bait region domain-containing protein	8.6312	1.179e-06	5.9285	0.00078167	RHTiB_10min - RHTiB_BL; RHTiB_BL - RHTiB_24hr; RHTiB_10min - RHTiB_3hr; RHTiB_10min - RHTiB_6hr; RHTiB_10min - RHTiB_24hr; RHTiB_30min - RHTiB_3hr; RHTiB_30min - RHTiB_24hr; RHTiB_1hr - RHTiB_3hr; RHTiB_1hr - RHTiB_24hr; RHTiB_3hr - RHTiB_24hr; RHTiB_6hr - RHTiB_24hr
I3JVH3	NADH dehydrogenase [ubiquinone] 1 alpha subcomplex subunit 10, mitochondrial	10.943	4.9361e-08	7.3066	6.5452e-05	RHTiB_30min - RHTiB_BL; RHTiB_1hr - RHTiB_BL; RHTiB_3hr - RHTiB_BL; RHTiB_24hr - RHTiB_BL; RHTiB_30min - RHTiB_10min; RHTiB_1hr - RHTiB_10min; RHTiB_3hr - RHTiB_10min; RHTiB_24hr - RHTiB_10min; RHTiB_1hr - RHTiB_30min; RHTiB_30min - RHTiB_6hr; RHTiB_24hr - RHTiB_30min; RHTiB_1hr - RHTiB_3hr; RHTiB_1hr - RHTiB_6hr; RHTiB_3hr - RHTiB_6hr; RHTiB_24hr - RHTiB_6hr
I3K3Q3	60S ribosomal protein L17	6.3508	3.8479e-05	4.4148	0.012756	RHTiB_6hr - RHTiB_BL; RHTiB_24hr - RHTiB_BL; RHTiB_6hr - RHTiB_10min; RHTiB_24hr - RHTiB_10min; RHTiB_6hr - RHTiB_30min; RHTiB_24hr - RHTiB_30min; RHTiB_6hr - RHTiB_1hr; RHTiB_24hr - RHTiB_1hr; RHTiB_6hr - RHTiB_3hr; RHTiB_24hr - RHTiB_3hr
A0A669EYP7	GTPase IMAP family member 7	6.8424	1.7569e-05	4.7552	0.0077657	RHTiB_24hr - RHTiB_BL; RHTiB_24hr - RHTiB_10min; RHTiB_24hr - RHTiB_30min; RHTiB_24hr - RHTiB_1hr; RHTiB_24hr - RHTiB_3hr; RHTiB_24hr - RHTiB_6hr
