# Supplementary material for: Proteomic and phosphoproteomic profilings reveal distinct cellular responses during Tilapinevirus tilapiae entry and replication
Source: PeerJ. 2025 Feb 21;13:e18923. doi: 10.7717/peerj.18923 (PMC11849505; doi:10.7717/peerj.18923)
Supplement: Supplemental Information 9 [file peerj-13-18923-s009.xlsx]

## Sheet: 10 min
Protein ID	Protein name	FDR	Fisher's LSD
A0A669CTQ5	Protein phosphatase 2 regulatory subunit B'alpha	1.2753e-05	RHTiB_BL - RHTiB_10min; RHTiB_BL - RHTiB_30min; RHTiB_BL - RHTiB_1hr; RHTiB_BL - RHTiB_3hr; RHTiB_BL - RHTiB_6hr; RHTiB_BL - RHTiB_24hr
I3K9W5	methenyltetrahydrofolate cyclohydrolase (EC 3.5.4.9)	0.0437	RHTiB_BL - RHTiB_10min; RHTiB_BL - RHTiB_30min; RHTiB_BL - RHTiB_1hr; RHTiB_BL - RHTiB_3hr; RHTiB_BL - RHTiB_6hr; RHTiB_BL - RHTiB_24hr
I3KG25	Tetraspanin 13	0.0437	RHTiB_BL - RHTiB_10min; RHTiB_BL - RHTiB_30min; RHTiB_BL - RHTiB_1hr; RHTiB_BL - RHTiB_3hr; RHTiB_BL - RHTiB_6hr; RHTiB_BL - RHTiB_24hr
A0A669CN37	Multidrug resistance-associated protein 5	0.0035373	RHTiB_BL - RHTiB_10min; RHTiB_BL - RHTiB_30min; RHTiB_BL - RHTiB_1hr; RHTiB_BL - RHTiB_6hr; RHTiB_BL - RHTiB_24hr; RHTiB_30min - RHTiB_10min; RHTiB_1hr - RHTiB_10min; RHTiB_3hr - RHTiB_10min; RHTiB_30min - RHTiB_6hr; RHTiB_3hr - RHTiB_6hr; RHTiB_3hr - RHTiB_24hr

## Sheet: PP 10 min
Protein ID	Protein name	FDR	Fisher's LSD
A0A669CUF4	BCAS3 microtubule associated cell migration factor	5.542	0.00014557	3.8369	0.038605	RHTiB_BL - RHTiB_10min; RHTiB_BL - RHTiB_30min; RHTiB_BL - RHTiB_1hr; RHTiB_BL - RHTiB_3hr; RHTiB_BL - RHTiB_6hr; RHTiB_BL - RHTiB_24hr; RHTiB_1hr - RHTiB_30min; RHTiB_3hr - RHTiB_30min; RHTiB_6hr - RHTiB_30min; RHTiB_24hr - RHTiB_30min

## Sheet: 24 h
Protein ID	Protein name	FDR	Fisher's LSD
A0A669EXK3	24 h	Myosin heavy chain 9	4.6457e-08	RHTiB_24hr - RHTiB_BL; RHTiB_24hr - RHTiB_10min; RHTiB_24hr - RHTiB_30min; RHTiB_24hr - RHTiB_1hr; RHTiB_24hr - RHTiB_3hr; RHTiB_24hr - RHTiB_6hr
A0A669DA65	24 h	Tensin-3	0.0437	RHTiB_24hr - RHTiB_BL; RHTiB_24hr - RHTiB_10min; RHTiB_24hr - RHTiB_30min; RHTiB_24hr - RHTiB_1hr; RHTiB_24hr - RHTiB_3hr; RHTiB_24hr - RHTiB_6hr
A0A669BWE0	24 h	C-1-tetrahydrofolate synthase, cytoplasmic (EC 1.5.1.5) (EC 3.5.4.9) (EC 6.3.4.3)	0.0437	RHTiB_24hr - RHTiB_BL; RHTiB_24hr - RHTiB_10min; RHTiB_24hr - RHTiB_30min; RHTiB_24hr - RHTiB_1hr; RHTiB_24hr - RHTiB_3hr; RHTiB_24hr - RHTiB_6hr
A0A669DUQ5	24 h	Pleckstrin homology domain containing, family H (with MyTH4 domain) member 2	0.0437	RHTiB_24hr - RHTiB_BL; RHTiB_24hr - RHTiB_10min; RHTiB_24hr - RHTiB_30min; RHTiB_24hr - RHTiB_1hr; RHTiB_24hr - RHTiB_3hr; RHTiB_24hr - RHTiB_6hr

## Sheet: PP 24 h
Protein ID	Protein name	f.value	p.value	-log10(p)	FDR	Fisher's LSD
I3K3Q3	60S ribosomal protein L17	6.3508	3.8479e-05	4.4148	0.012756	RHTiB_6hr - RHTiB_BL; RHTiB_24hr - RHTiB_BL; RHTiB_6hr - RHTiB_10min; RHTiB_24hr - RHTiB_10min; RHTiB_6hr - RHTiB_30min; RHTiB_24hr - RHTiB_30min; RHTiB_6hr - RHTiB_1hr; RHTiB_24hr - RHTiB_1hr; RHTiB_6hr - RHTiB_3hr; RHTiB_24hr - RHTiB_3hr
A0A669EYP7	GTPase IMAP family member 7	6.8424	1.7569e-05	4.7552	0.0077657	RHTiB_24hr - RHTiB_BL; RHTiB_24hr - RHTiB_10min; RHTiB_24hr - RHTiB_30min; RHTiB_24hr - RHTiB_1hr; RHTiB_24hr - RHTiB_3hr; RHTiB_24hr - RHTiB_6hr
