# Supplementary material for: Proteomic and phosphoproteomic profilings reveal distinct cellular responses during Tilapinevirus tilapiae entry and replication
Source: PeerJ. 2025 Feb 21;13:e18923. doi: 10.7717/peerj.18923 (PMC11849505; doi:10.7717/peerj.18923)
Supplement: Supplemental Information 10 [file peerj-13-18923-s010.xlsx]

## Sheet: 10 min
	KeGG E11_10_min
Pathway	URL	Genes
Path:hsa04152 AMPK signaling pathway	http://www.genome.jp/kegg-bin/show_pathway?hsa04152	PPP2CA PPP2CB PPP2R1A PPP2R2A PPP2R5A PPP2R5C RPS6KB1
Path:hsa03015 mRNA surveillance pathway	http://www.genome.jp/kegg-bin/show_pathway?hsa03015	PPP2CA PPP2CB PPP2R1A PPP2R2A PPP2R5A PPP2R5C
Path:hsa04071 Sphingolipid signaling pathway	http://www.genome.jp/kegg-bin/show_pathway?hsa04071	PPP2CA PPP2CB PPP2R1A PPP2R2A PPP2R5A PPP2R5C
Path:hsa04728 Dopaminergic synapse	http://www.genome.jp/kegg-bin/show_pathway?hsa04728	PPP2CA PPP2CB PPP2R1A PPP2R2A PPP2R5A PPP2R5C
Path:hsa04261 Adrenergic signaling in cardiomyocytes	http://www.genome.jp/kegg-bin/show_pathway?hsa04261	PPP2CA PPP2CB PPP2R1A PPP2R2A PPP2R5A PPP2R5C
Path:hsa05165 Human papillomavirus infection	http://www.genome.jp/kegg-bin/show_pathway?hsa05165	PPP2CA PPP2CB PPP2R1A PPP2R2A PPP2R5A PPP2R5C RPS6KB1
Path:hsa04151 PI3K-Akt signaling pathway	http://www.genome.jp/kegg-bin/show_pathway?hsa04151	PPP2CA PPP2CB PPP2R1A PPP2R2A PPP2R5A PPP2R5C RPS6KB1
Path:hsa04114 Oocyte meiosis	http://www.genome.jp/kegg-bin/show_pathway?hsa04114	PPP2CA PPP2CB PPP2R1A PPP2R5A PPP2R5C
Path:hsa00670 One carbon pool by folate	http://www.genome.jp/kegg-bin/show_pathway?hsa00670	MTHFD2 AMT SHMT2
Path:hsa04350 TGF-beta signaling pathway	http://www.genome.jp/kegg-bin/show_pathway?hsa04350	PPP2CA PPP2CB PPP2R1A RPS6KB1
Path:hsa05142 Chagas disease	http://www.genome.jp/kegg-bin/show_pathway?hsa05142	PPP2CA PPP2CB PPP2R1A PPP2R2A
Path:hsa04390 Hippo signaling pathway	http://www.genome.jp/kegg-bin/show_pathway?hsa04390	PPP2CA PPP2CB PPP2R1A PPP2R2A
Path:hsa05160 Hepatitis C	http://www.genome.jp/kegg-bin/show_pathway?hsa05160	PPP2CA PPP2CB PPP2R1A PPP2R2A
Path:hsa04530 Tight junction	http://www.genome.jp/kegg-bin/show_pathway?hsa04530	PPP2CA PPP2CB PPP2R1A PPP2R2A
Path:hsa04730 Long-term depression	http://www.genome.jp/kegg-bin/show_pathway?hsa04730	PPP2CA PPP2CB PPP2R1A
Path:hsa04140 Autophagy-animal	http://www.genome.jp/kegg-bin/show_pathway?hsa04140	PPP2CA PPP2CB RPS6KB1
Path:hsa00630 Glyoxylate and dicarboxylate metabolism	http://www.genome.jp/kegg-bin/show_pathway?hsa00630	AMT SHMT2
Path:hsa04136 Autophagy-other	http://www.genome.jp/kegg-bin/show_pathway?hsa04136	PPP2CA PPP2CB
Path:hsa00260 Glycine serine and threonine metabolism	http://www.genome.jp/kegg-bin/show_pathway?hsa00260	AMT SHMT2
Path:hsa01200 Carbon metabolism	http://www.genome.jp/kegg-bin/show_pathway?hsa01200	AMT SHMT2
Path:hsa01240 Biosynthesis of cofactors	http://www.genome.jp/kegg-bin/show_pathway?hsa01240	MTHFD2 SHMT2
Path:hsa01523 Antifolate resistance	http://www.genome.jp/kegg-bin/show_pathway?hsa01523	SHMT2
Path:hsa04213 Longevity regulating pathway-multiple species	http://www.genome.jp/kegg-bin/show_pathway?hsa04213	RPS6KB1
Path:hsa01100 Metabolic pathways	http://www.genome.jp/kegg-bin/show_pathway?hsa01100	MTHFD2 AMT SHMT2
Path:hsa01230 Biosynthesis of amino acids	http://www.genome.jp/kegg-bin/show_pathway?hsa01230	SHMT2
Path:hsa01521 EGFR tyrosine kinase inhibitor resistance	http://www.genome.jp/kegg-bin/show_pathway?hsa01521	RPS6KB1
Path:hsa01522 Endocrine resistance	http://www.genome.jp/kegg-bin/show_pathway?hsa01522	RPS6KB1
Path:hsa04012 ErbB signaling pathway	http://www.genome.jp/kegg-bin/show_pathway?hsa04012	RPS6KB1
Path:hsa04211 Longevity regulating pathway	http://www.genome.jp/kegg-bin/show_pathway?hsa04211	RPS6KB1
Path:hsa04666 Fc gamma R-mediated phagocytosis	http://www.genome.jp/kegg-bin/show_pathway?hsa04666	RPS6KB1
Path:hsa05210 Colorectal cancer	http://www.genome.jp/kegg-bin/show_pathway?hsa05210	RPS6KB1
Path:hsa05212 Pancreatic cancer	http://www.genome.jp/kegg-bin/show_pathway?hsa05212	RPS6KB1
Path:hsa05221 Acute myeloid leukemia	http://www.genome.jp/kegg-bin/show_pathway?hsa05221	RPS6KB1
Path:hsa05231 Choline metabolism in cancer	http://www.genome.jp/kegg-bin/show_pathway?hsa05231	RPS6KB1
Path:hsa05235 PD-L1 expression and PD-1 checkpoint pathway in cancer	http://www.genome.jp/kegg-bin/show_pathway?hsa05235	RPS6KB1
Path:hsa04066 HIF-1 signaling pathway	http://www.genome.jp/kegg-bin/show_pathway?hsa04066	RPS6KB1
Path:hsa04931 Insulin resistance	http://www.genome.jp/kegg-bin/show_pathway?hsa04931	RPS6KB1
Path:hsa04371 Apelin signaling pathway	http://www.genome.jp/kegg-bin/show_pathway?hsa04371	RPS6KB1
Path:hsa04910 Insulin signaling pathway	http://www.genome.jp/kegg-bin/show_pathway?hsa04910	RPS6KB1
Path:hsa05224 Breast cancer	http://www.genome.jp/kegg-bin/show_pathway?hsa05224	RPS6KB1
Path:hsa05226 Gastric cancer	http://www.genome.jp/kegg-bin/show_pathway?hsa05226	RPS6KB1
Path:hsa04150 mTOR signaling pathway	http://www.genome.jp/kegg-bin/show_pathway?hsa04150	RPS6KB1
Path:hsa05225 Hepatocellular carcinoma	http://www.genome.jp/kegg-bin/show_pathway?hsa05225	RPS6KB1
Path:hsa05207 Chemical carcinogenesis-receptor activation	http://www.genome.jp/kegg-bin/show_pathway?hsa05207	RPS6KB1
Path:hsa05205 Proteoglycans in cancer	http://www.genome.jp/kegg-bin/show_pathway?hsa05205	RPS6KB1
Path:hsa05170 Human immunodeficiency virus 1 infection	http://www.genome.jp/kegg-bin/show_pathway?hsa05170	RPS6KB1
Path:hsa05163 Human cytomegalovirus infection	http://www.genome.jp/kegg-bin/show_pathway?hsa05163	RPS6KB1
Path:hsa04714 Thermogenesis	http://www.genome.jp/kegg-bin/show_pathway?hsa04714	RPS6KB1
Path:hsa05131 Shigellosis	http://www.genome.jp/kegg-bin/show_pathway?hsa05131	RPS6KB1

## Sheet: 24 h
Enrichment FDR	nGenes	Pathway Genes	Fold Enrichment	Pathway	URL	Genes
0.00408958	5	354	6.0977	Path:hsa04530 Tight junction	http://www.genome.jp/kegg-bin/show_pathway?hsa04530	MYL12B MYL9 MYL12A RHOA MYH9 MYH10 MYL6 ACTB
0.00423309	4	210	8.22318	Path:hsa04810 Regulation of actin cytoskeleton	http://www.genome.jp/kegg-bin/show_pathway?hsa04810	MYL12B MYL9 MYL12A ARHGEF12 RHOA MYH9 MYH10 ACTB
0.0044455	5	364	5.93018	Path:hsa04270 Vascular smooth muscle contraction	http://www.genome.jp/kegg-bin/show_pathway?hsa04270	MYL9 ARHGEF12 RHOA MYH9 MYH10 MYL6
0.00515834	4	224	7.70923	Path:hsa05132 Salmonella infection	http://www.genome.jp/kegg-bin/show_pathway?hsa05132	MYL12B MYL9 MYL12A HSP90AA1 RHOA PKN1 ACTB
0.0071114	4	246	7.01979	Path:hsa04670 Leukocyte transendothelial migration	http://www.genome.jp/kegg-bin/show_pathway?hsa04670	MYL12B MYL9 MYL12A RHOA ACTB
0.00734761	3	119	10.8836	Path:hsa04611 Platelet activation	http://www.genome.jp/kegg-bin/show_pathway?hsa04611	MYL12B MYL12A ARHGEF12 RHOA ACTB
0.00756498	3	121	10.7037	Path:hsa05131 Shigellosis	http://www.genome.jp/kegg-bin/show_pathway?hsa05131	MYL12B MYL9 MYL12A RHOA ACTB UBC
0.0112282	3	141	9.18547	Path:hsa04360 Axon guidance	http://www.genome.jp/kegg-bin/show_pathway?hsa04360	MYL12B MYL9 MYL12A ARHGEF12 RHOA
0.0112282	3	141	9.18547	Path:hsa04510 Focal adhesion	http://www.genome.jp/kegg-bin/show_pathway?hsa04510	MYL12B MYL9 MYL12A RHOA ACTB
0.0112578	3	142	9.12078	Path:hsa05130 Pathogenic Escherichia coli infection	http://www.genome.jp/kegg-bin/show_pathway?hsa05130	ARHGEF12 RHOA MYH9 MYH10 ACTB
0.0124229	3	148	8.75102	Path:hsa03015 mRNA surveillance pathway	http://www.genome.jp/kegg-bin/show_pathway?hsa03015	CASC3 MAGOH UPF3B EIF4A3
0.020628	2	59	14.6345	Path:hsa03013 Nucleocytoplasmic transport	http://www.genome.jp/kegg-bin/show_pathway?hsa03013	CASC3 MAGOH UPF3B EIF4A3
0.0209642	2	60	14.3906	Path:hsa05135 Yersinia infection	http://www.genome.jp/kegg-bin/show_pathway?hsa05135	ARHGEF12 RHOA PKN1 ACTB
0.0219769	2	62	13.9264	Path:hsa04921 Oxytocin signaling pathway	http://www.genome.jp/kegg-bin/show_pathway?hsa04921	MYL9 RHOA MYL6 ACTB
0.022798	3	189	6.85265	Path:hsa05418 Fluid shear stress and atherosclerosis	http://www.genome.jp/kegg-bin/show_pathway?hsa05418	HSP90AA1 RHOA ACTB
0.0254343	2	68	12.6976	Path:hsa04621 NOD-like receptor signaling pathway	http://www.genome.jp/kegg-bin/show_pathway?hsa04621	HSP90AA1 RHOA PKN1
0.0257587	2	69	12.5135	Path:hsa05205 Proteoglycans in cancer	http://www.genome.jp/kegg-bin/show_pathway?hsa05205	ARHGEF12 RHOA ACTB
0.0305097	2	76	11.361	Path:hsa04520 Adherens junction	http://www.genome.jp/kegg-bin/show_pathway?hsa04520	RHOA ACTB
0.0315819	2	78	11.0697	Path:hsa05100 Bacterial invasion of epithelial cells	http://www.genome.jp/kegg-bin/show_pathway?hsa05100	RHOA ACTB
0.0318857	2	79	10.9295	Path:hsa04625 C-type lectin receptor signaling pathway	http://www.genome.jp/kegg-bin/show_pathway?hsa04625	ARHGEF12 RHOA
0.0320316	3	222	5.83401	Path:hsa04722 Neurotrophin signaling pathway	http://www.genome.jp/kegg-bin/show_pathway?hsa04722	RHOA ARHGDIA
0.0320316	3	223	5.80785	Path:hsa03040 Spliceosome	http://www.genome.jp/kegg-bin/show_pathway?hsa03040	MAGOH EIF4A3
0.0343209	2	84	10.279	Path:hsa04022 cGMP-PKG signaling pathway	http://www.genome.jp/kegg-bin/show_pathway?hsa04022	MYL9 RHOA
0.0377482	2	89	9.70151	Path:hsa05152 Tuberculosis	http://www.genome.jp/kegg-bin/show_pathway?hsa05152	ARHGEF12 RHOA
0.0420868	2	95	9.08878	Path:hsa05200 Pathways in cancer	http://www.genome.jp/kegg-bin/show_pathway?hsa05200	ARHGEF12 HSP90AA1 RHOA
0.0440102	2	98	8.81055	Path:hsa04015 Rap1 signaling pathway	http://www.genome.jp/kegg-bin/show_pathway?hsa04015	RHOA ACTB
0.045099	2	100	8.63434	Path:hsa05417 Lipid and atherosclerosis	http://www.genome.jp/kegg-bin/show_pathway?hsa05417	HSP90AA1 RHOA
0.0461853	2	102	8.46504	Path:hsa04024 cAMP signaling pathway	http://www.genome.jp/kegg-bin/show_pathway?hsa04024	MYL9 RHOA
0.0472692	2	104	8.30225	Path:hsa05163 Human cytomegalovirus infection	http://www.genome.jp/kegg-bin/show_pathway?hsa05163	ARHGEF12 RHOA
0.0500542	2	108	7.99476	Path:hsa05012 Parkinson disease	http://www.genome.jp/kegg-bin/show_pathway?hsa05012	PSMD4 UBC
0.0591043	2	119	7.25575	Path:hsa04962 Vasopressin-regulated water reabsorption	http://www.genome.jp/kegg-bin/show_pathway?hsa04962	ARHGDIA
0.0648098	2	126	6.85265	Path:hsa03050 Proteasome	http://www.genome.jp/kegg-bin/show_pathway?hsa03050	PSMD4
0.072573	2	135	6.39581	Path:hsa04151 PI3K-Akt signaling pathway	http://www.genome.jp/kegg-bin/show_pathway?hsa04151	HSP90AA1 PKN1
0.0736321	2	137	6.30244	Path:hsa05110 Vibrio cholerae infection	http://www.genome.jp/kegg-bin/show_pathway?hsa05110	ACTB
0.0737181	2	138	6.25677	Path:hsa05014 Amyotrophic lateral sclerosis	http://www.genome.jp/kegg-bin/show_pathway?hsa05014	PSMD4 ACTB
0.0739091	3	331	3.91284	Path:hsa05416 Viral myocarditis	http://www.genome.jp/kegg-bin/show_pathway?hsa05416	ACTB
0.0806756	2	147	5.8737	Path:hsa03320 PPAR signaling pathway	http://www.genome.jp/kegg-bin/show_pathway?hsa03320	UBC
0.0807233	2	148	5.83401	Path:hsa04137 Mitophagy-animal	http://www.genome.jp/kegg-bin/show_pathway?hsa04137	UBC
0.0876737	2	156	5.53483	Path:hsa04612 Antigen processing and presentation	http://www.genome.jp/kegg-bin/show_pathway?hsa04612	HSP90AA1
0.0876798	2	157	5.49958	Path:hsa04971 Gastric acid secretion	http://www.genome.jp/kegg-bin/show_pathway?hsa04971	ACTB
0.0906671	2	161	5.36294	Path:hsa05133 Pertussis	http://www.genome.jp/kegg-bin/show_pathway?hsa05133	RHOA
0.0956653	2	167	5.17026	Path:hsa05412 Arrhythmogenic right ventricular cardiomyopathy	http://www.genome.jp/kegg-bin/show_pathway?hsa05412	ACTB
0.0966322	2	169	5.10908	Path:hsa05022 Pathways of neurodegeneration-multiple diseases	http://www.genome.jp/kegg-bin/show_pathway?hsa05022	PSMD4 UBC
0.113043	2	186	4.64212	Path:hsa05210 Colorectal cancer	http://www.genome.jp/kegg-bin/show_pathway?hsa05210	RHOA
0.137806	2	210	4.11159	Path:hsa04350 TGF-beta signaling pathway	http://www.genome.jp/kegg-bin/show_pathway?hsa04350	RHOA
0.145241	1	41	10.5297	Path:hsa04657 IL-17 signaling pathway	http://www.genome.jp/kegg-bin/show_pathway?hsa04657	HSP90AA1
0.16197	2	235	3.67419	Path:hsa04660 T cell receptor signaling pathway	http://www.genome.jp/kegg-bin/show_pathway?hsa04660	RHOA
0.16197	1	47	9.18547	Path:hsa04914 Progesterone-mediated oocyte maturation	http://www.genome.jp/kegg-bin/show_pathway?hsa04914	HSP90AA1
0.169979	1	50	8.63434	Path:hsa04972 Pancreatic secretion	http://www.genome.jp/kegg-bin/show_pathway?hsa04972	RHOA
0.193449	1	58	7.4434	Path:hsa05215 Prostate cancer	http://www.genome.jp/kegg-bin/show_pathway?hsa05215	HSP90AA1
				Path:hsa05410 Hypertrophic cardiomyopathy	http://www.genome.jp/kegg-bin/show_pathway?hsa05410	ACTB
				Path:hsa05414 Dilated cardiomyopathy	http://www.genome.jp/kegg-bin/show_pathway?hsa05414	ACTB
				Path:hsa04659 Th17 cell differentiation	http://www.genome.jp/kegg-bin/show_pathway?hsa04659	HSP90AA1
				Path:hsa04928 Parathyroid hormone synthesis secretion and action	http://www.genome.jp/kegg-bin/show_pathway?hsa04928	RHOA
				Path:hsa04071 Sphingolipid signaling pathway	http://www.genome.jp/kegg-bin/show_pathway?hsa04071	RHOA
				Path:hsa04919 Thyroid hormone signaling pathway	http://www.genome.jp/kegg-bin/show_pathway?hsa04919	ACTB
				Path:hsa04120 Ubiquitin mediated proteolysis	http://www.genome.jp/kegg-bin/show_pathway?hsa04120	UBC
				Path:hsa04210 Apoptosis	http://www.genome.jp/kegg-bin/show_pathway?hsa04210	ACTB
				Path:hsa04915 Estrogen signaling pathway	http://www.genome.jp/kegg-bin/show_pathway?hsa04915	HSP90AA1
				Path:hsa05017 Spinocerebellar ataxia	http://www.genome.jp/kegg-bin/show_pathway?hsa05017	PSMD4
				Path:hsa04072 Phospholipase D signaling pathway	http://www.genome.jp/kegg-bin/show_pathway?hsa04072	RHOA
				Path:hsa04141 Protein processing in endoplasmic reticulum	http://www.genome.jp/kegg-bin/show_pathway?hsa04141	HSP90AA1
				Path:hsa04145 Phagosome	http://www.genome.jp/kegg-bin/show_pathway?hsa04145	ACTB
				Path:hsa04150 mTOR signaling pathway	http://www.genome.jp/kegg-bin/show_pathway?hsa04150	RHOA
				Path:hsa04217 Necroptosis	http://www.genome.jp/kegg-bin/show_pathway?hsa04217	HSP90AA1
				Path:hsa04310 Wnt signaling pathway	http://www.genome.jp/kegg-bin/show_pathway?hsa04310	RHOA
				Path:hsa04390 Hippo signaling pathway	http://www.genome.jp/kegg-bin/show_pathway?hsa04390	ACTB
				Path:hsa05164 Influenza A	http://www.genome.jp/kegg-bin/show_pathway?hsa05164	ACTB
				Path:hsa05206 MicroRNAs in cancer	http://www.genome.jp/kegg-bin/show_pathway?hsa05206	RHOA
				Path:hsa05225 Hepatocellular carcinoma	http://www.genome.jp/kegg-bin/show_pathway?hsa05225	ACTB
				Path:hsa04062 Chemokine signaling pathway	http://www.genome.jp/kegg-bin/show_pathway?hsa04062	RHOA
				Path:hsa04613 Neutrophil extracellular trap formation	http://www.genome.jp/kegg-bin/show_pathway?hsa04613	ACTB
				Path:hsa05167 Kaposi sarcoma-associated herpesvirus infection	http://www.genome.jp/kegg-bin/show_pathway?hsa05167	UBC
				Path:hsa05169 Epstein-Barr virus infection	http://www.genome.jp/kegg-bin/show_pathway?hsa05169	PSMD4
				Path:hsa05203 Viral carcinogenesis	http://www.genome.jp/kegg-bin/show_pathway?hsa05203	RHOA
				Path:hsa05207 Chemical carcinogenesis-receptor activation	http://www.genome.jp/kegg-bin/show_pathway?hsa05207	HSP90AA1
